# Supplementary material for: Multisubstituted pyrimidines effectively inhibit bacterial growth and biofilm formation of Staphylococcus aureus
Source: PubMed Central journal article supplement (PMC8041844; doi:10.1038/s41598-021-86852-5), 2021-04-12

## Supplementary NMR Appendix

# Multisubstituted pyrimidines effectively inhibit bacterial growth and biofilm formation of *Staphylococcus aureus*

Riccardo Provenzani<sup>1†</sup>, Paola San-Martin-Galindo<sup>2†</sup>, Ghada Hassan<sup>1†</sup>, Ashenafi Legehar<sup>1</sup>, Aleksi Kallio<sup>1</sup>, Henri Xhaard<sup>1</sup>, Adyary Fallarero<sup>2</sup>,

Jari Yli-Kauhaluoma<sup>1\*</sup>

<sup>1</sup>Drug Research Program, Division of Pharmaceutical Chemistry and Technology, Faculty of Pharmacy, University of Helsinki, P.O. Box 56 (Viikinkaari 5 E), FI-00014, Helsinki, Finland

<sup>2</sup>Drug Research Program, Division of Pharmaceutical Biosciences, Faculty of Pharmacy, University of Helsinki, P.O. Box 56 (Viikinkaari 5 E), FI-00014, Helsinki, Finland

\*email: [jari.yli-kauhaluoma@helsinki.fi](mailto:jari.yli-kauhaluoma@helsinki.fi)

†These authors contributed equally to this work.

# NMR Spectra

Peak reports and multiplet assignments are provided for all compounds. Compound peaks are highlighted in **green** and solvent peaks in **yellow**. All 2D-NMR spectra are edited to highlight the correlation peaks. <sup>13</sup>C-HSQC spectra include DEPT-135 information with –CH– and –CH<sub>3</sub> correlation peaks in positive phase (**red**) while –CH<sub>2</sub>– correlation peaks in negative phase (**blue**). For most of the compounds, <sup>15</sup>N-HMBC spectrum and corresponding <sup>15</sup>N 1D projection are also reported.

## Table of contents

| Compounds                | Page |
|--------------------------|------|
| Compound <b>4b</b> ..... | 005  |
| Compound <b>4c</b> ..... | 011  |
| Compound <b>4d</b> ..... | 017  |
| Compound <b>4e</b> ..... | 023  |
| Compound <b>4f</b> ..... | 029  |
| Compound <b>5b</b> ..... | 037  |
| Compound <b>5c</b> ..... | 043  |
| Compound <b>5d</b> ..... | 049  |
| Compound <b>5e</b> ..... | 055  |

|          |            |       |     |
|----------|------------|-------|-----|
| Compound | <b>6b</b>  | ..... | 061 |
| Compound | <b>6c</b>  | ..... | 067 |
| Compound | <b>6d</b>  | ..... | 073 |
| Compound | <b>6e</b>  | ..... | 079 |
| Compound | <b>7a</b>  | ..... | 085 |
| Compound | <b>7b</b>  | ..... | 091 |
| Compound | <b>7c</b>  | ..... | 097 |
| Compound | <b>7d</b>  | ..... | 103 |
| Compound | <b>7e</b>  | ..... | 109 |
| Compound | <b>7f</b>  | ..... | 115 |
| Compound | <b>8d</b>  | ..... | 123 |
| Compound | <b>9a</b>  | ..... | 130 |
| Compound | <b>9b</b>  | ..... | 134 |
| Compound | <b>9c</b>  | ..... | 140 |
| Compound | <b>9d</b>  | ..... | 144 |
| Compound | <b>9e</b>  | ..... | 150 |
| Compound | <b>10a</b> | ..... | 156 |
| Compound | <b>10b</b> | ..... | 160 |

|          |            |       |     |
|----------|------------|-------|-----|
| Compound | <b>10c</b> | ..... | 166 |
| Compound | <b>10d</b> | ..... | 172 |
| Compound | <b>10e</b> | ..... | 178 |
| Compound | <b>10f</b> | ..... | 182 |
| Compound | <b>11d</b> | ..... | 188 |
| Compound | <b>12b</b> | ..... | 193 |
| Compound | <b>12d</b> | ..... | 199 |

$^1\text{H}$  NMR (400 MHz,  $\text{CDCl}_3$ )  $\delta$  11.09 (br s, 1H), 7.00 – 6.90 (m, 2H), 6.90 – 6.77 (m, 2H), 4.98 (s, 2H), 4.37 (t,  $J = 6.8$  Hz, 2H), 3.77 (s, 3H), 2.24 (s, 3H), 1.82 – 1.70 (m, 2H), 1.52 – 1.38 (m, 2H), 0.97 (t,  $J = 7.4$  Hz, 3H).

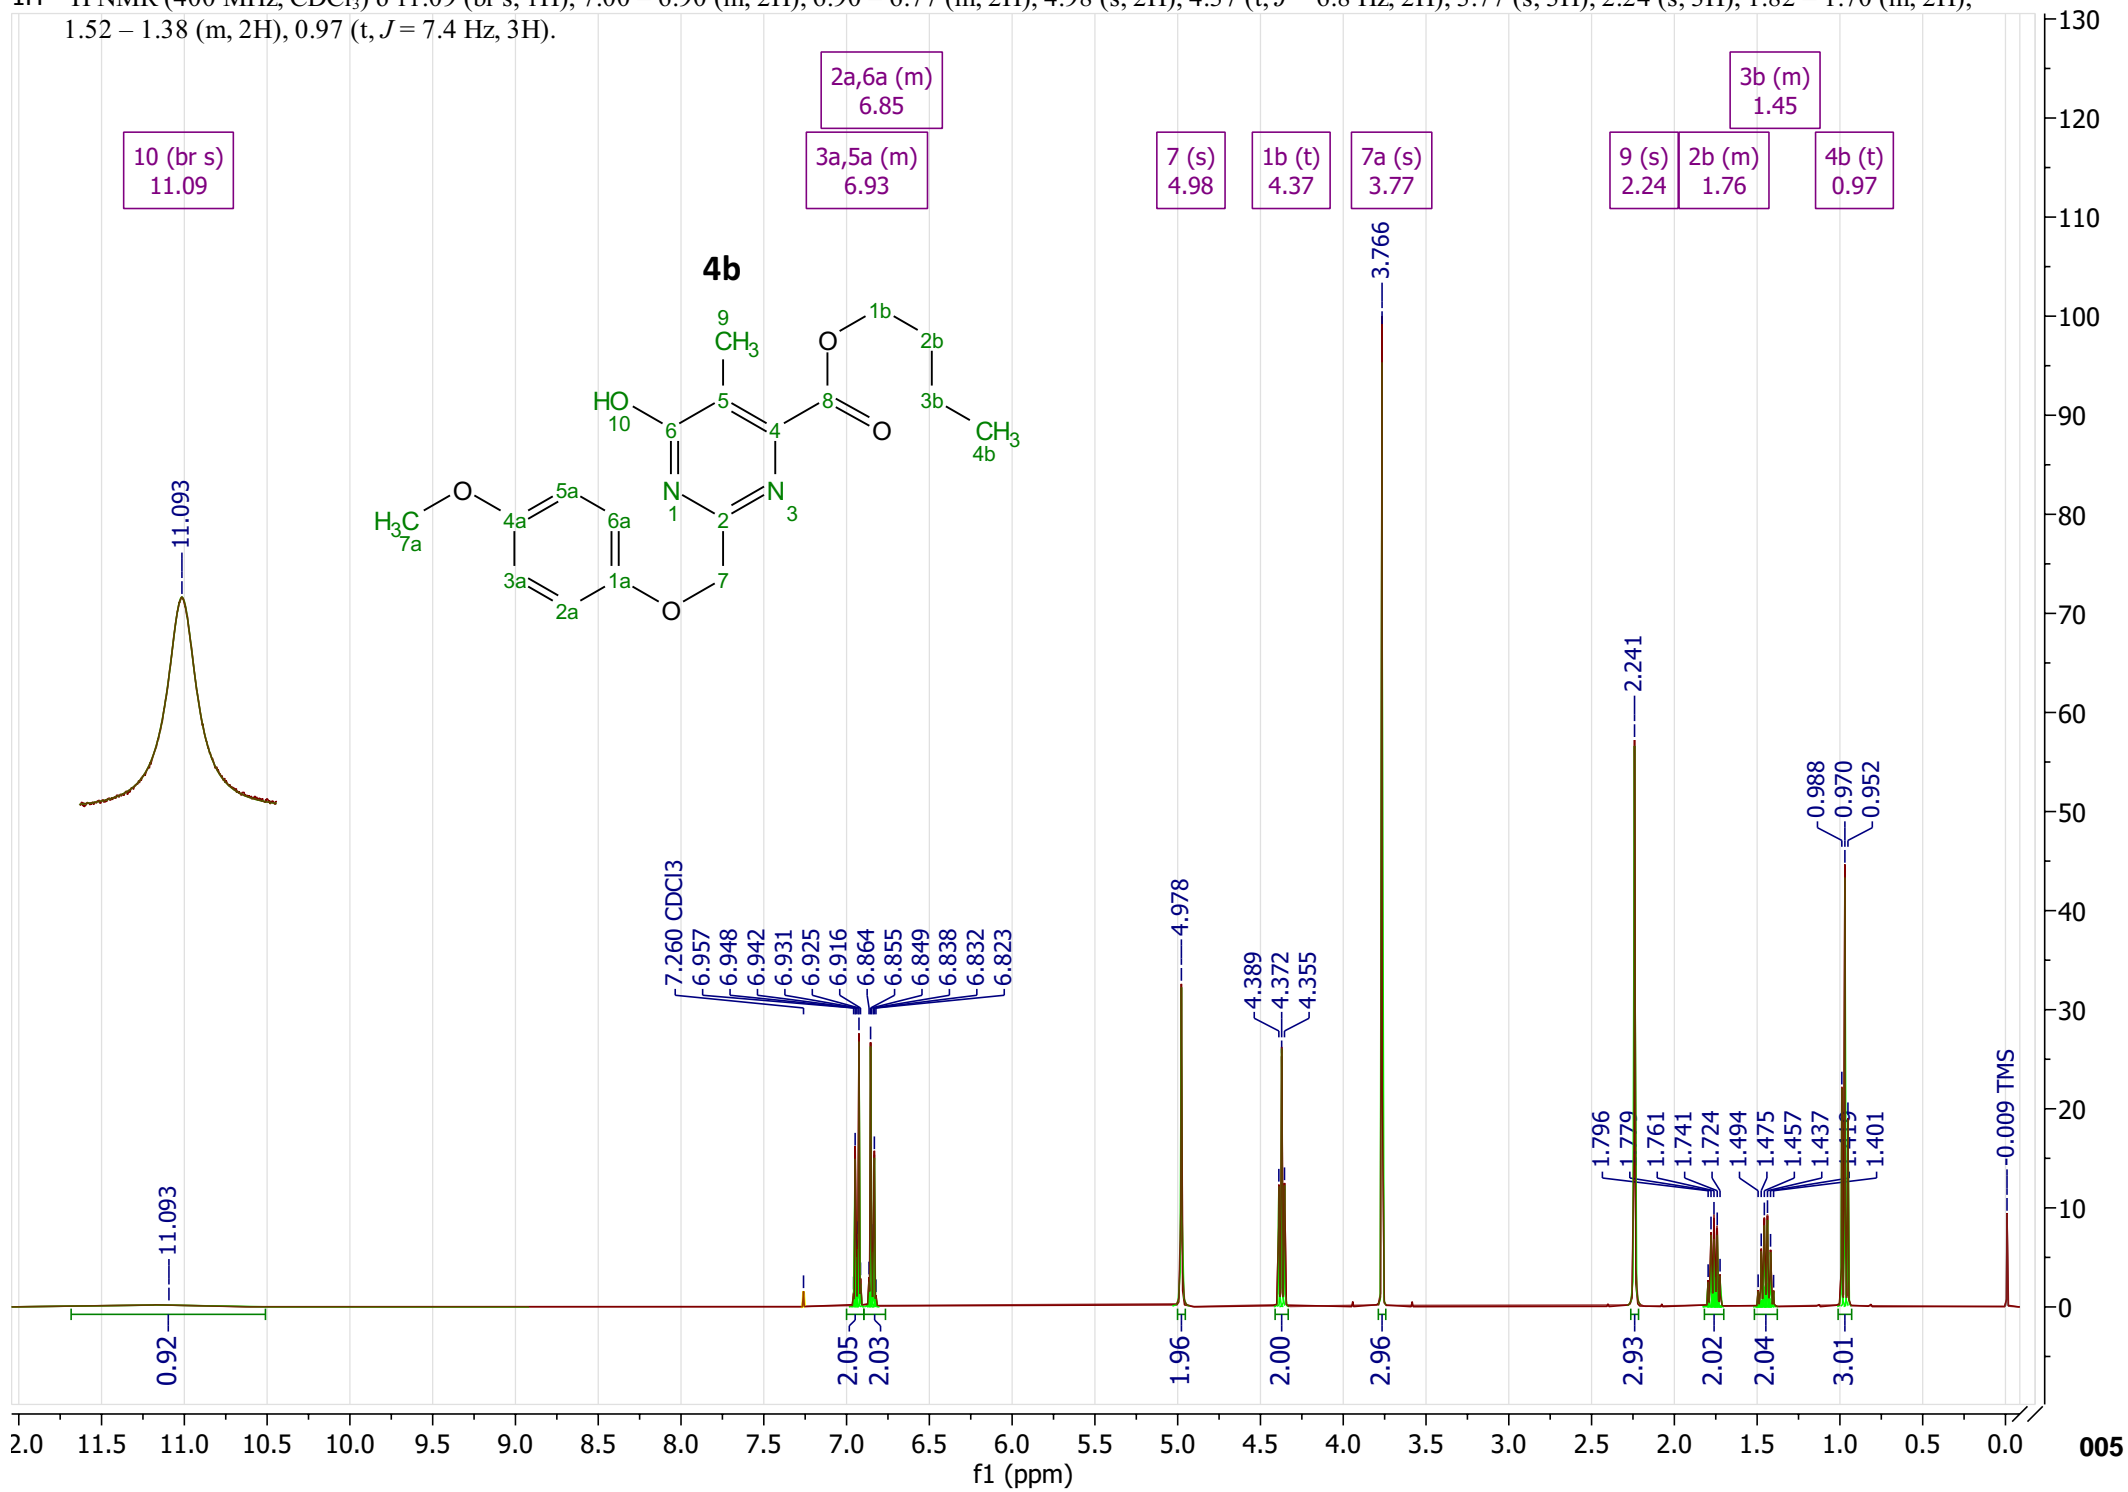

$^{13}\text{C}$  NMR (101 MHz,  $\text{CDCl}_3$ )  $\delta$  165.6, 163.7, 155.1, 154.7, 151.1, 150.1, 125.0, 115.9, 115.0, 67.3, 66.2, 55.8, 30.7, 19.3, 13.8, 11.8.

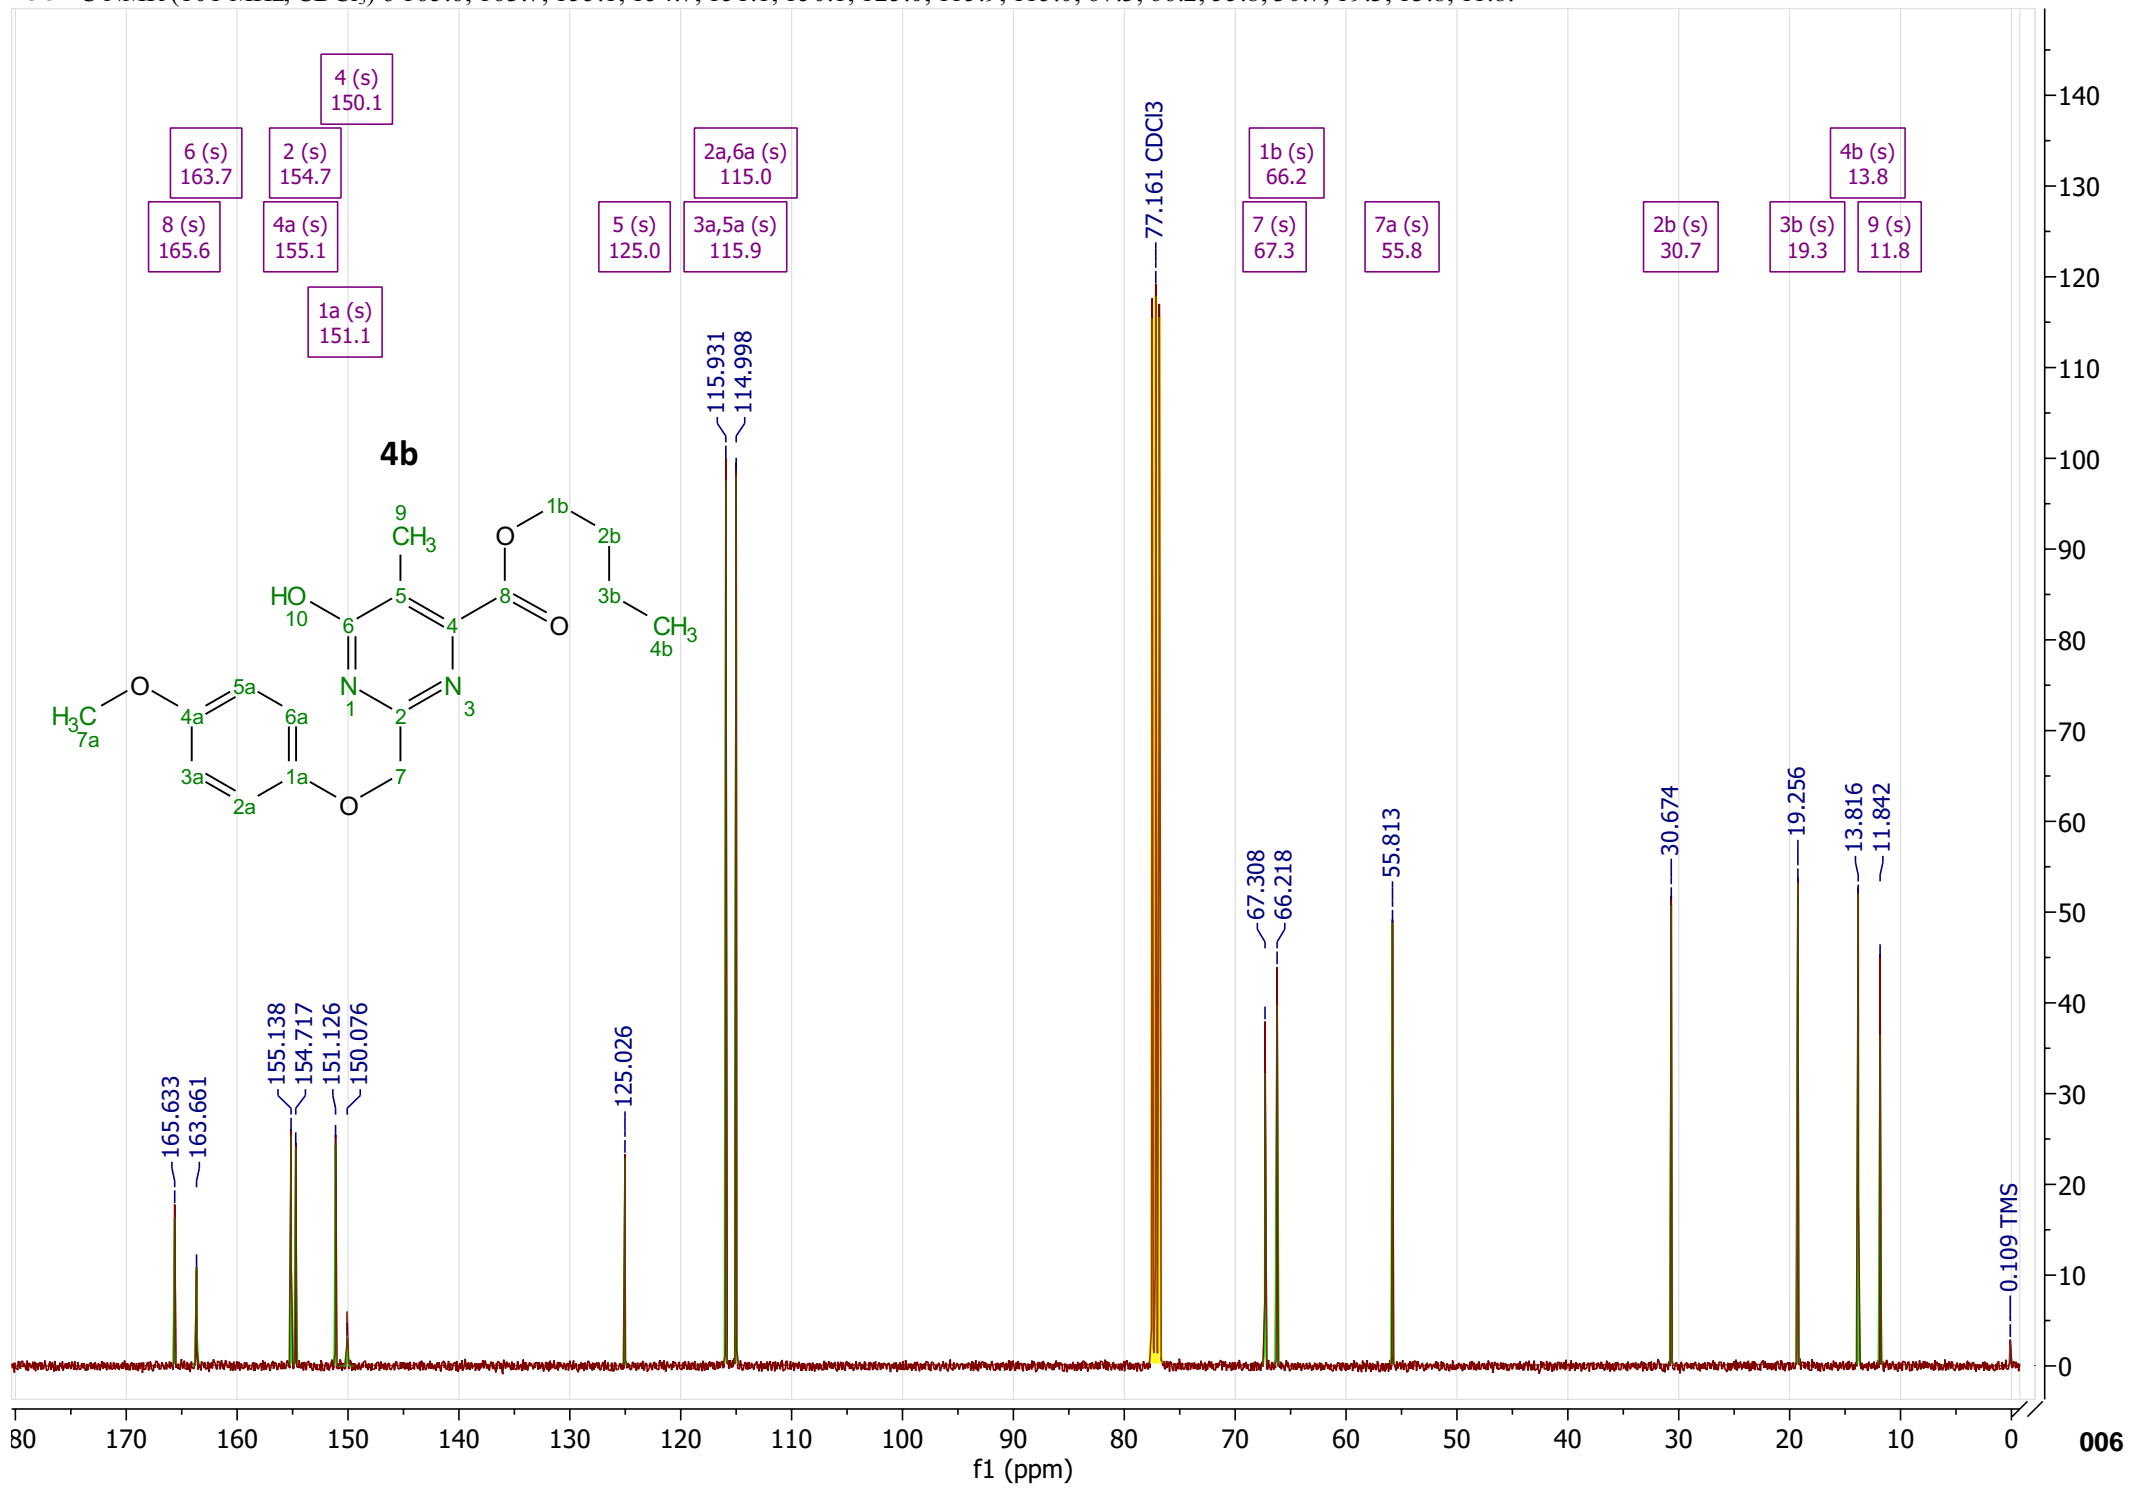

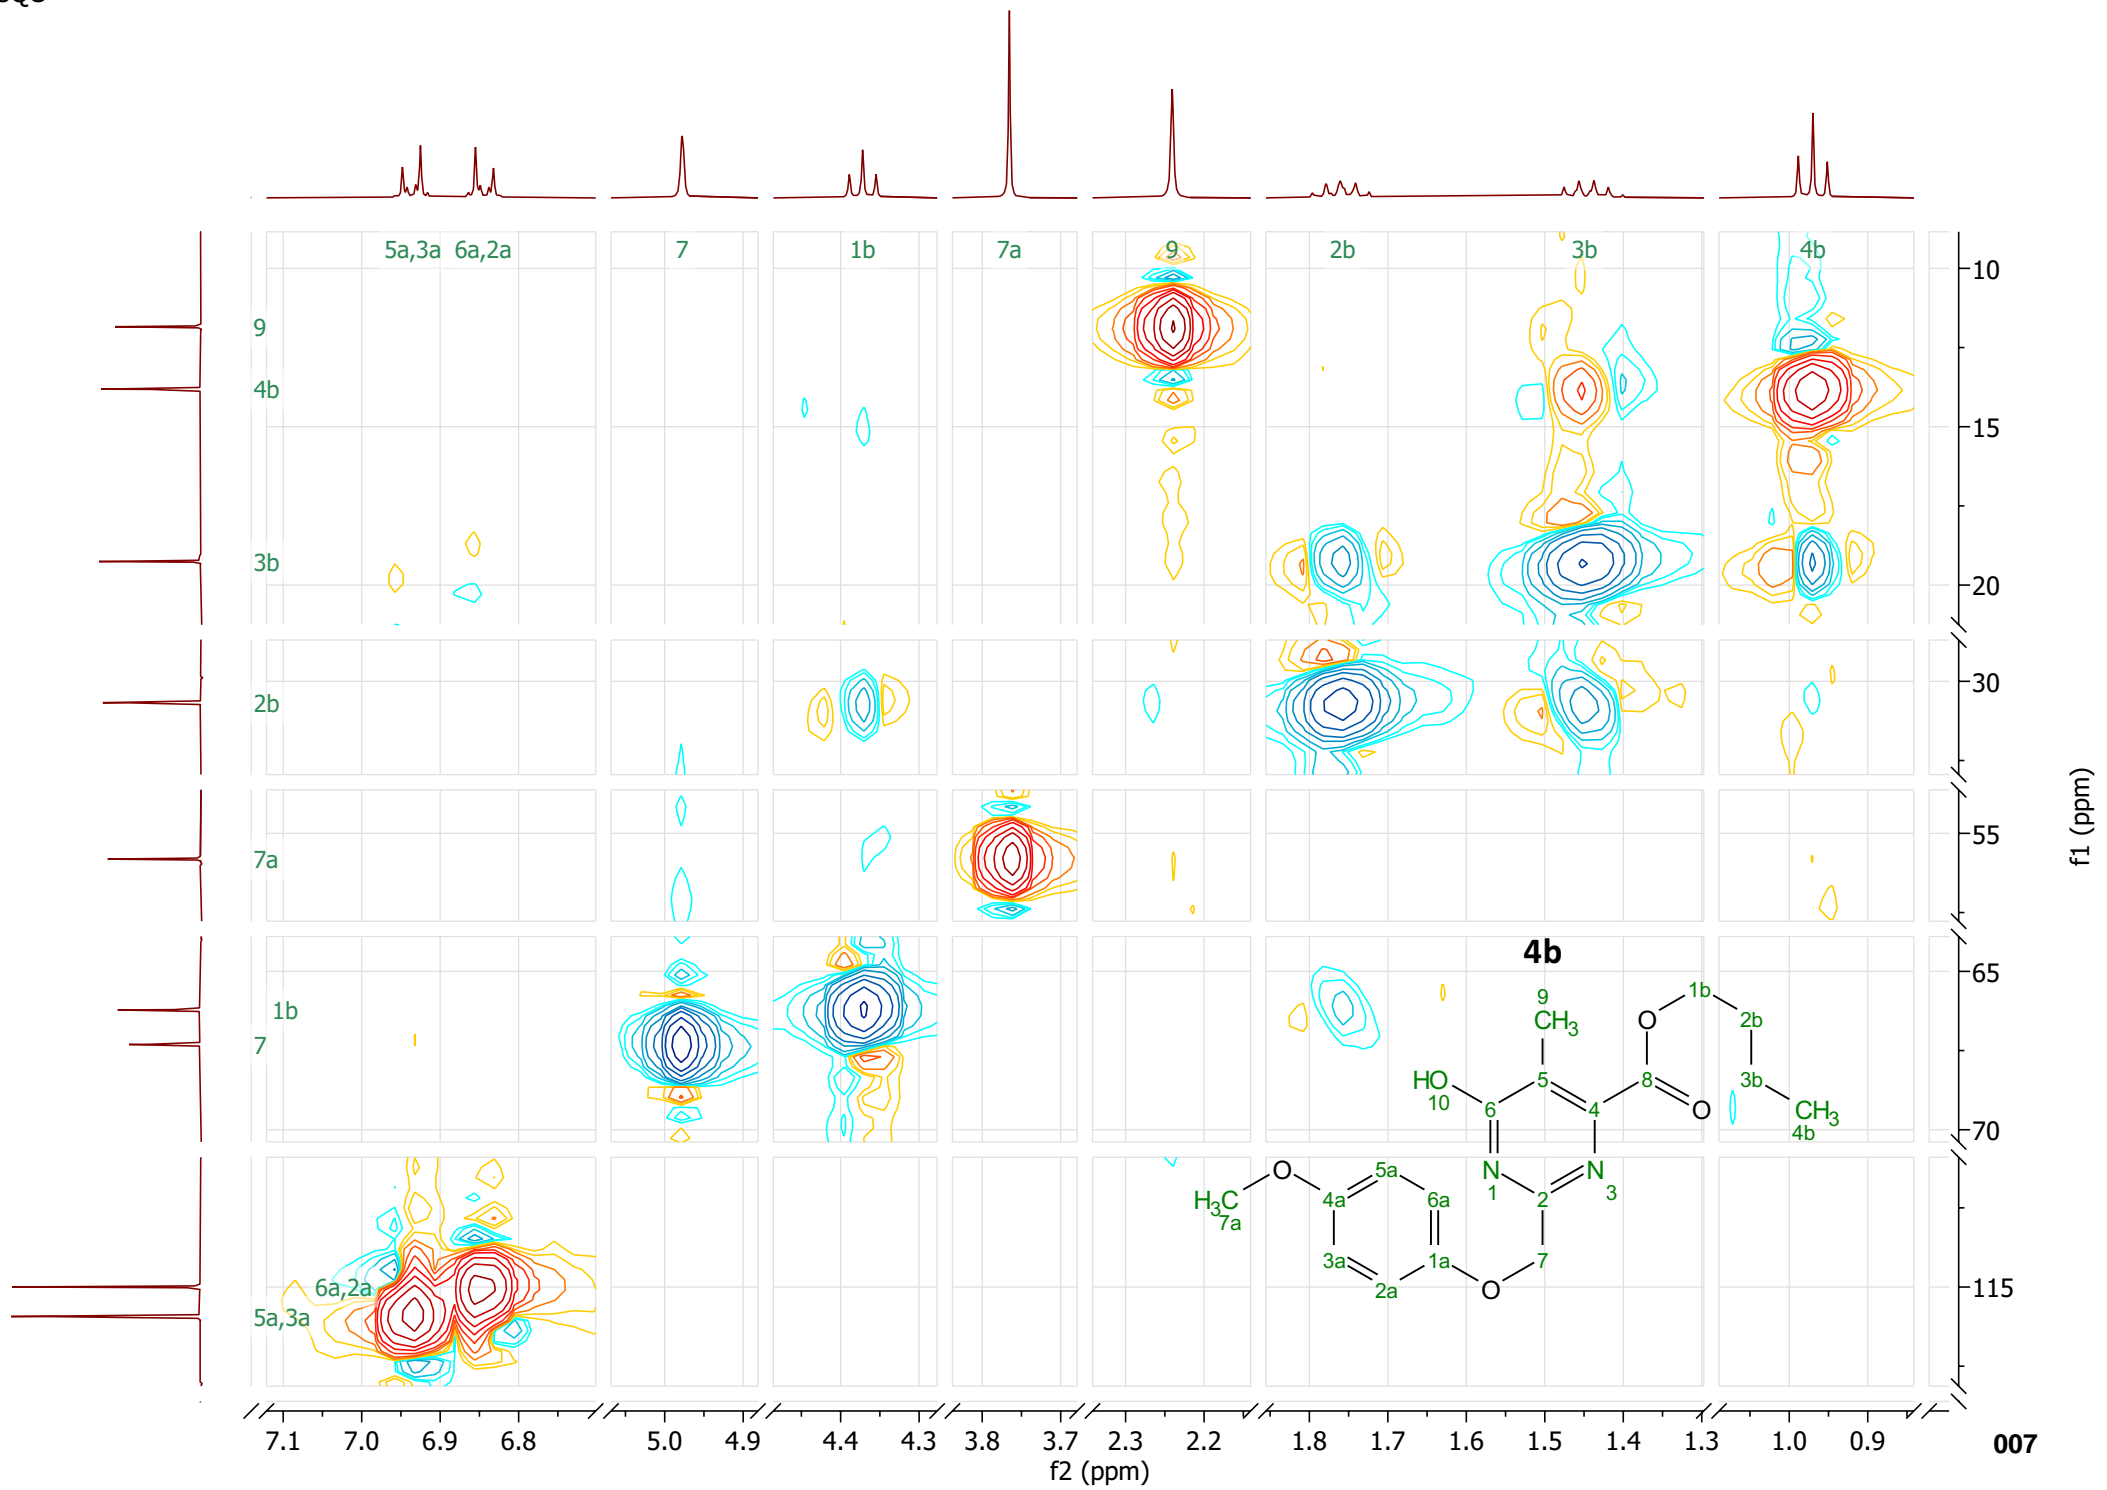

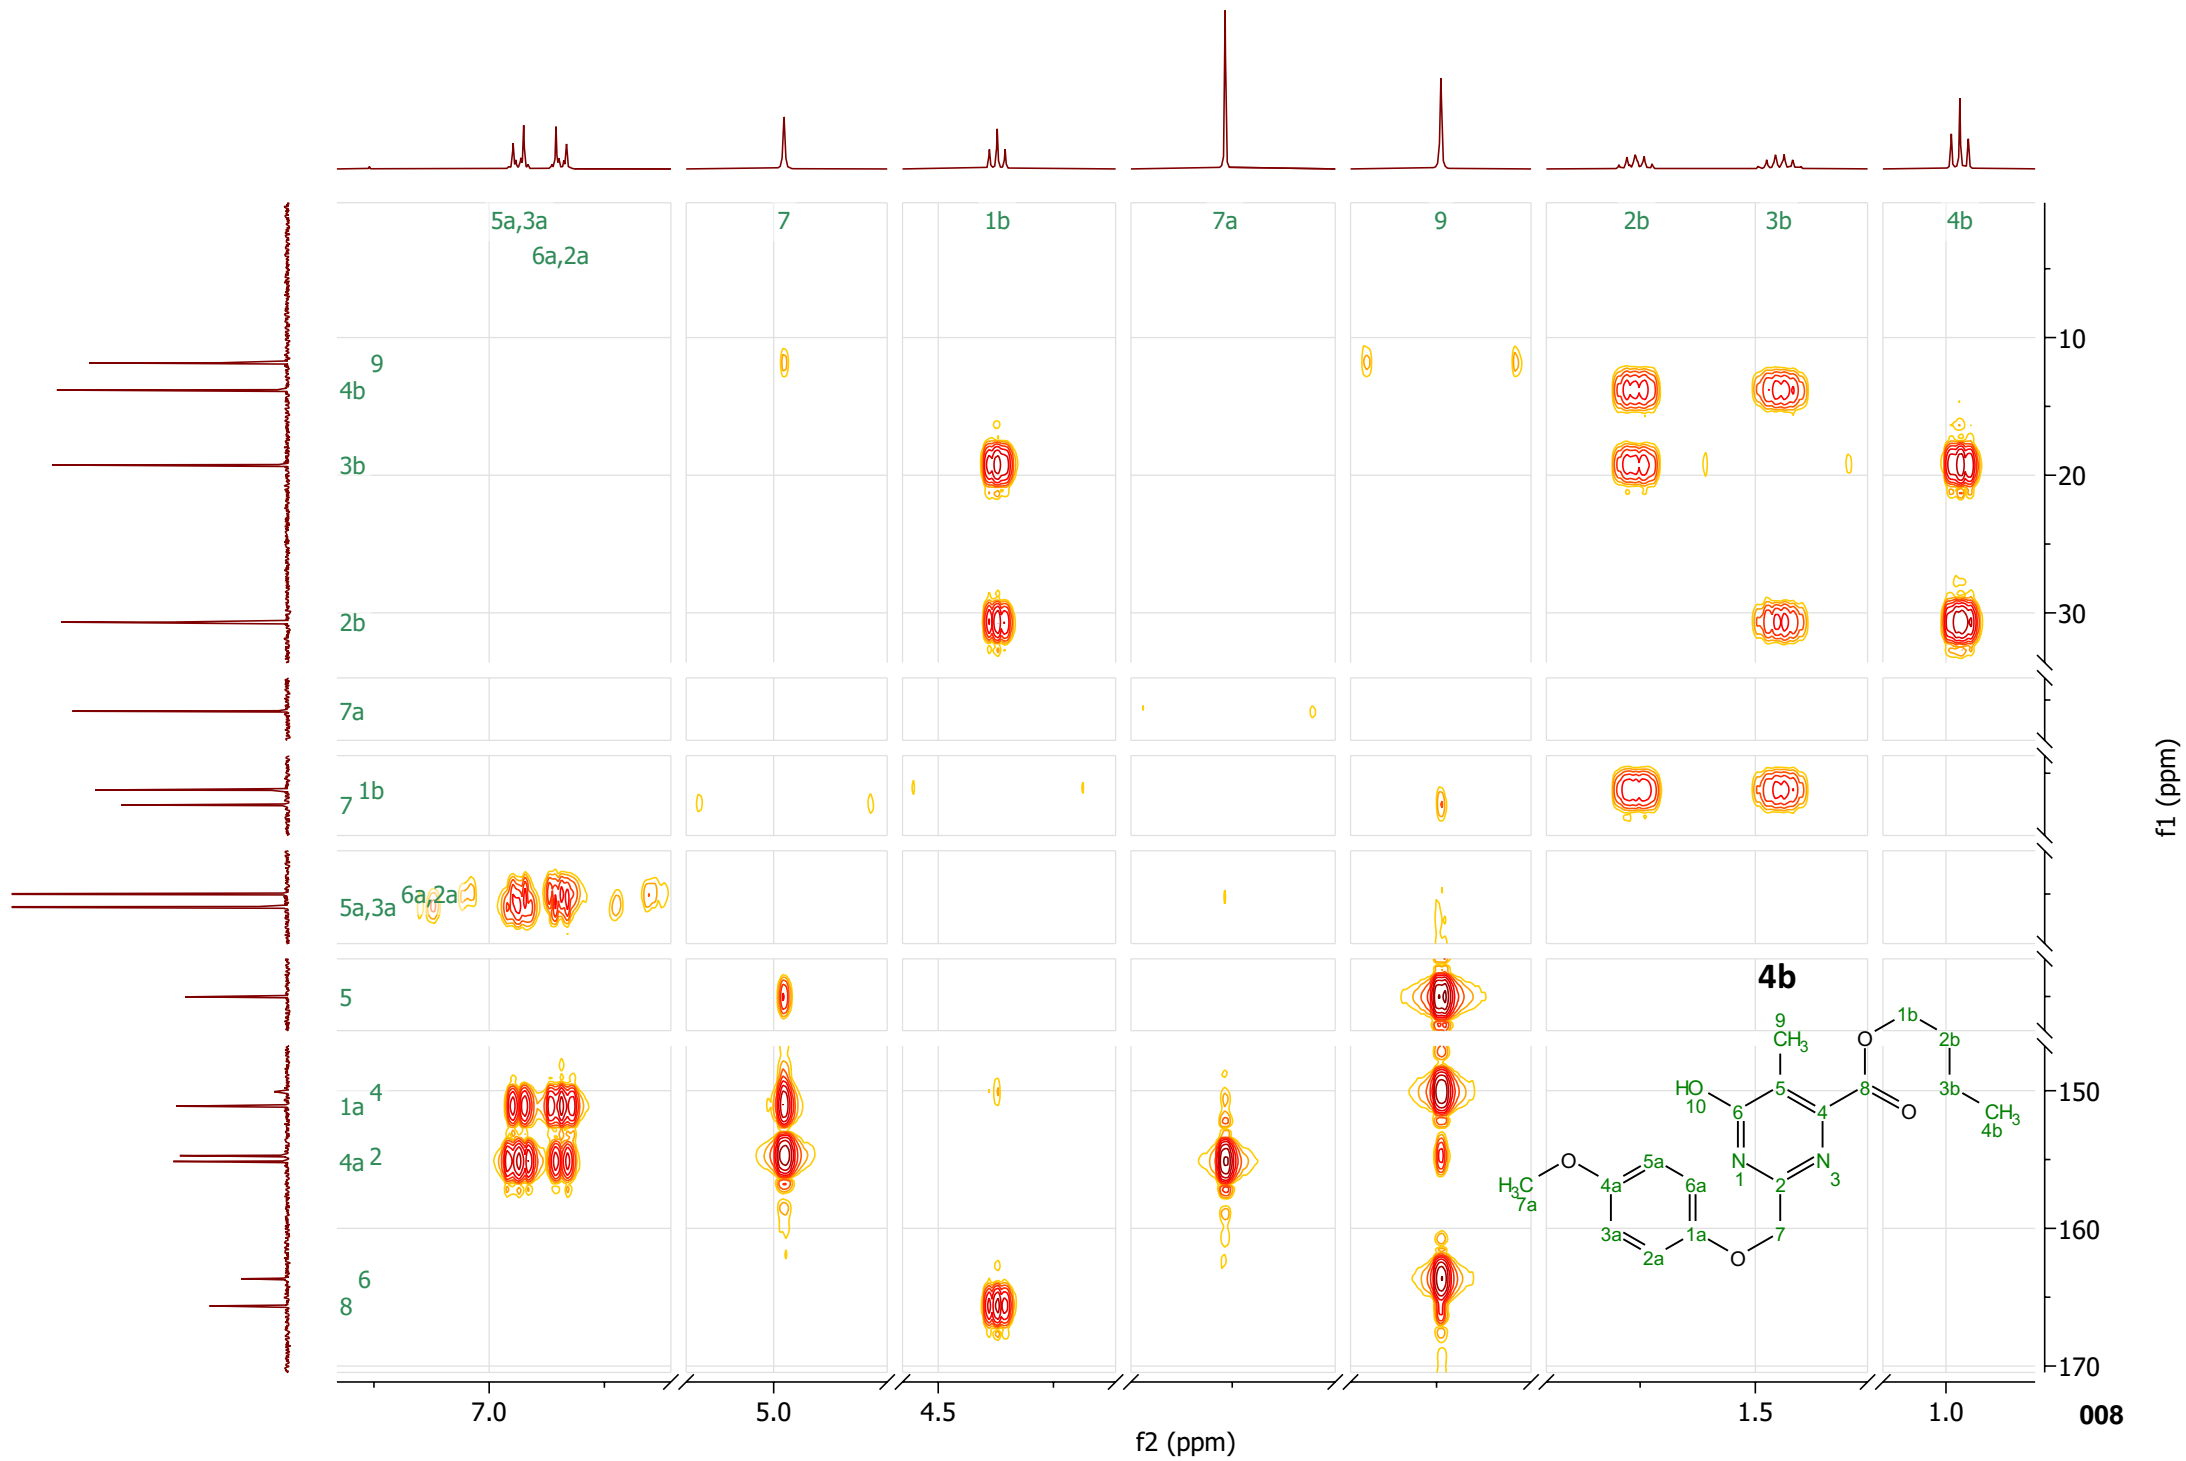



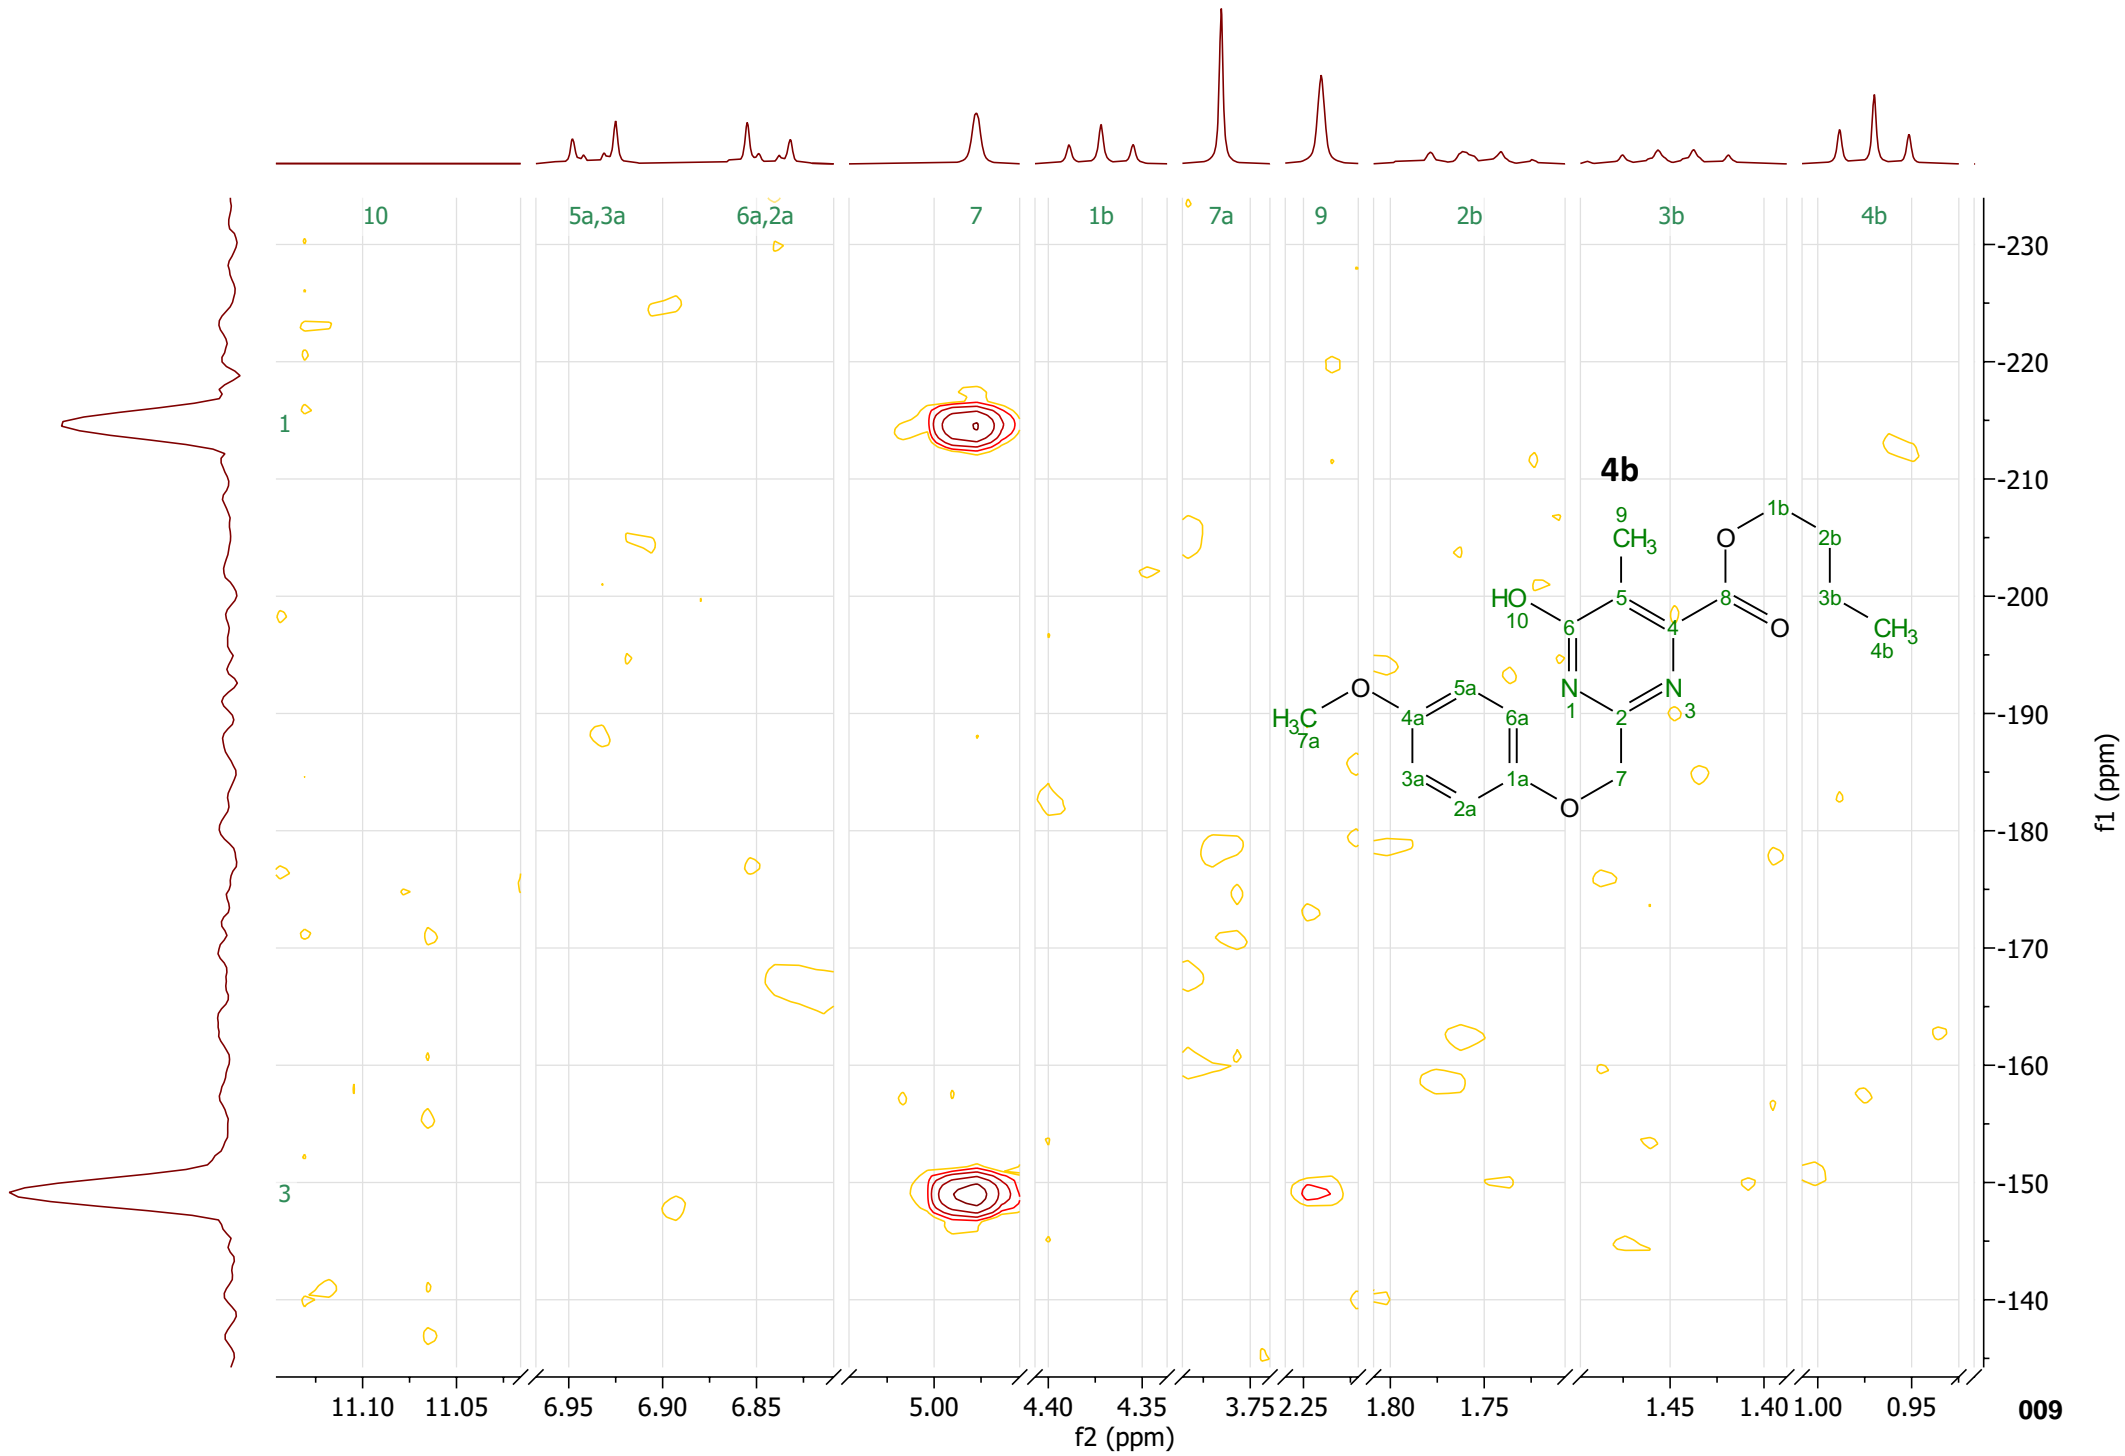

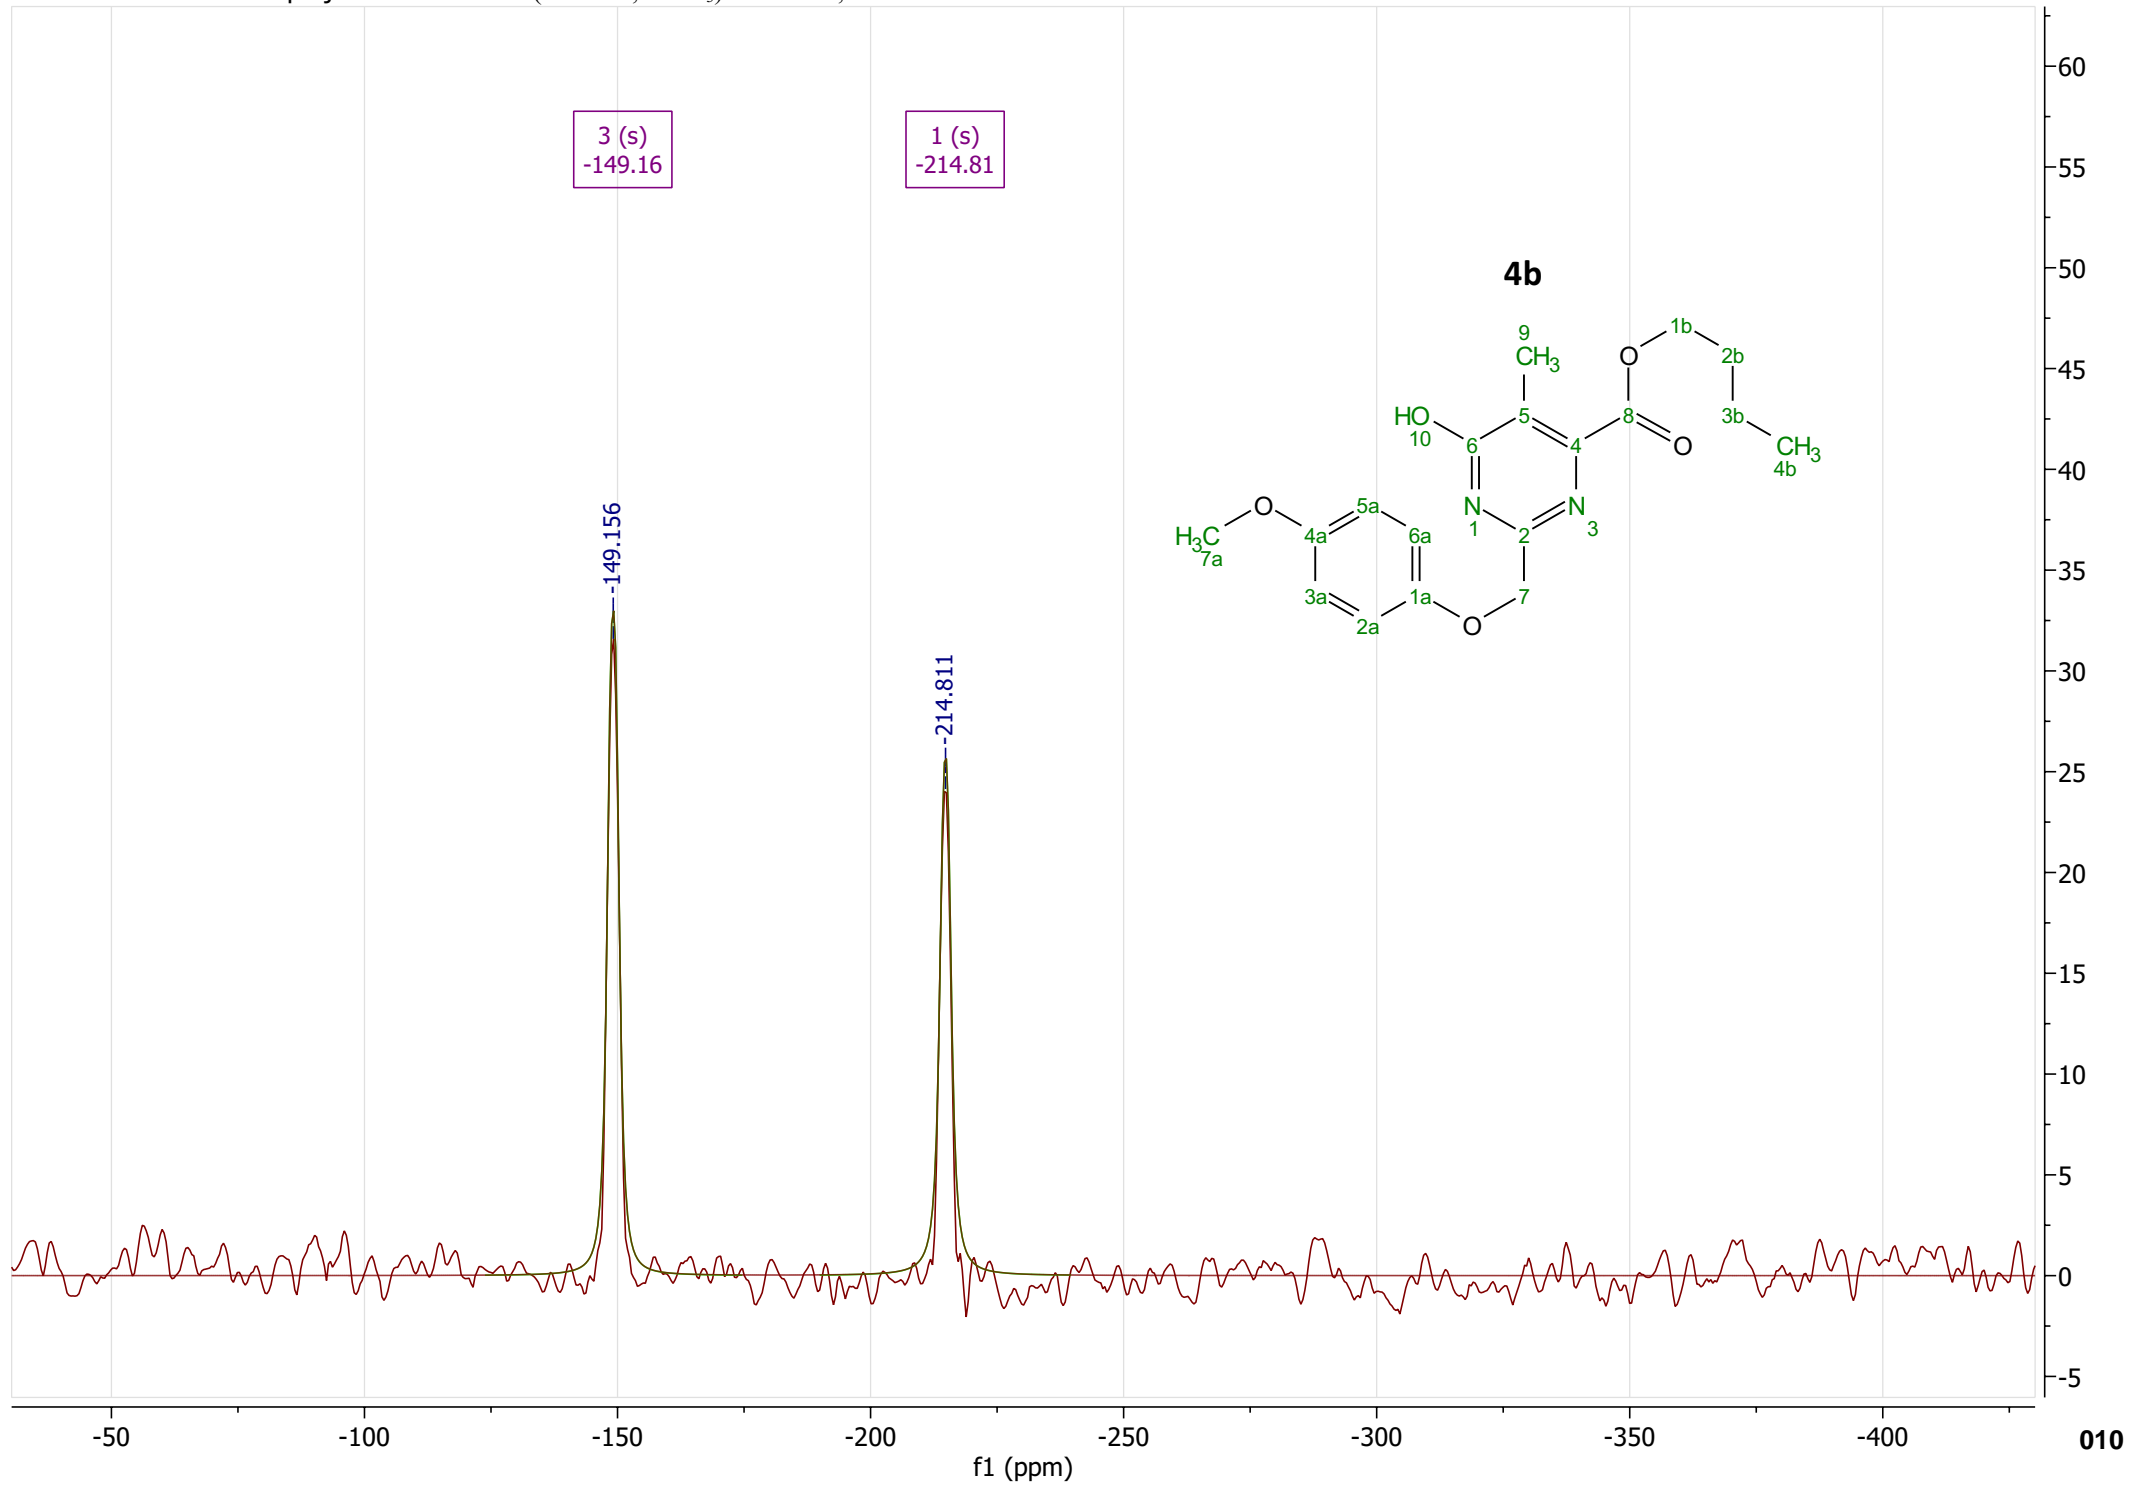

$^1\text{H}$  NMR (400 MHz,  $\text{CDCl}_3$ )  $\delta$  10.98 (br s, 1H), 6.98 – 6.89 (m, 2H), 6.89 – 6.79 (m, 2H), 4.98 (s, 2H), 4.36 (t,  $J = 6.9$  Hz, 2H), 3.77 (s, 3H), 2.24 (s, 3H), 1.83 – 1.70 (m, 2H), 1.47 – 1.22 (m, 8H), 0.88 (app t,  $J = 6.9$  Hz, 3H).

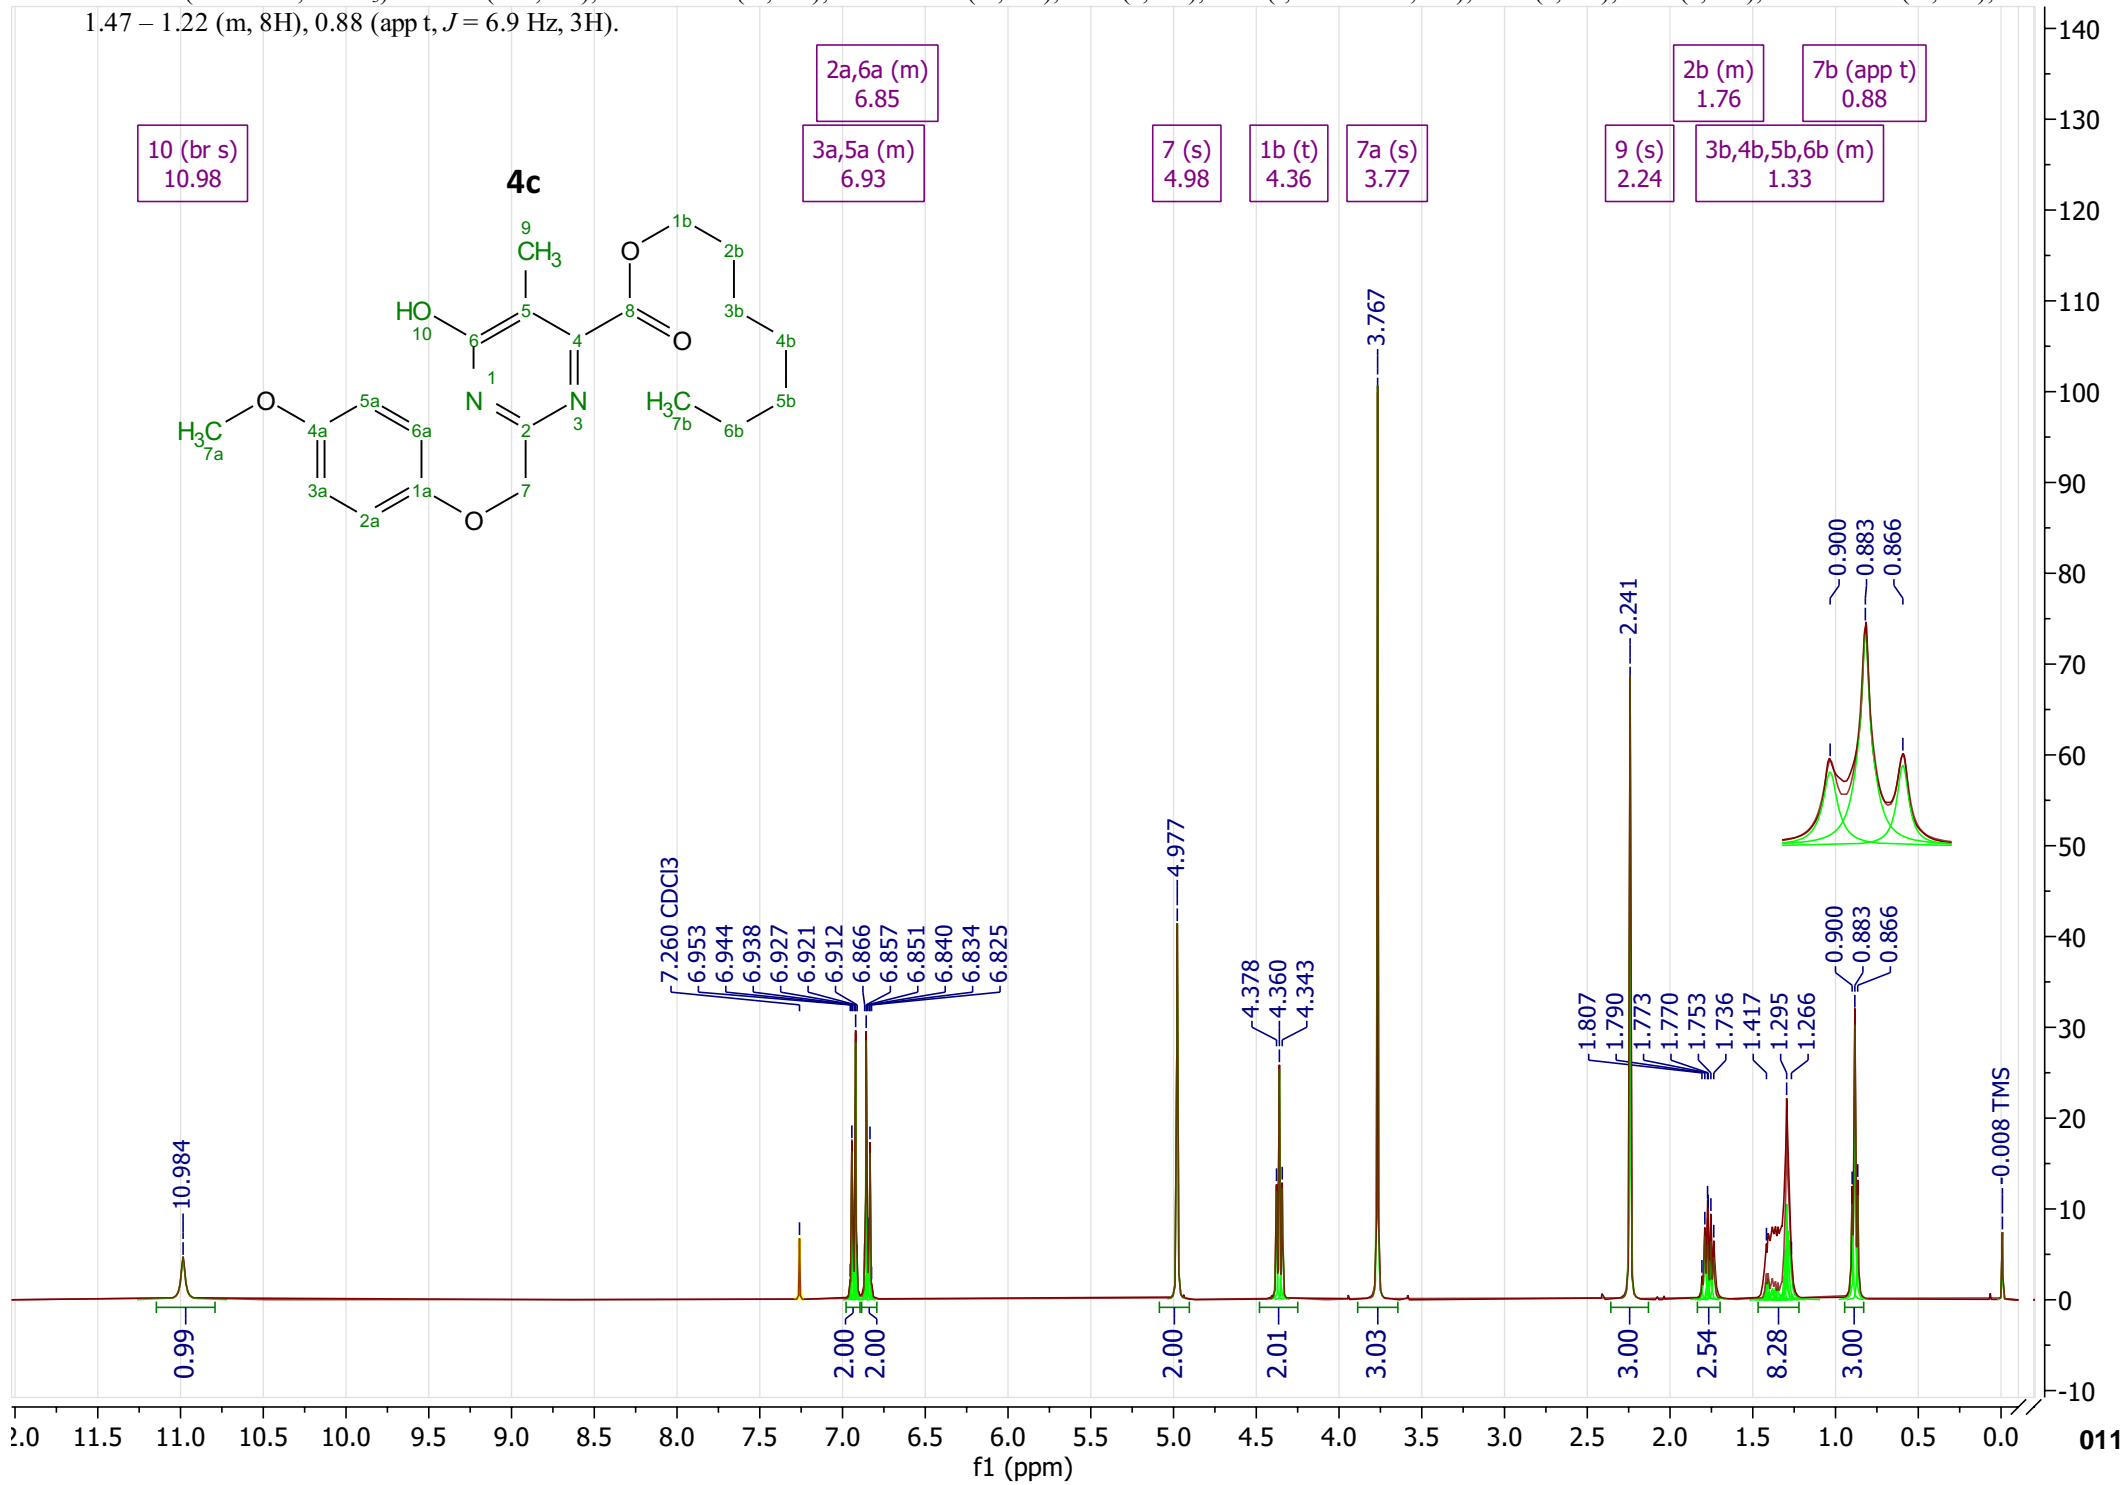

<sup>13</sup>C NMR (101 MHz, CDCl<sub>3</sub>) δ 165.7, 163.5, 155.2, 154.7, 151.1, 150.2, 125.0, 115.9 (sym, 2C), 115.0 (sym, 2C), 67.3, 66.5, 55.8, 31.8, 29.0, 28.6, 25.9, 22.7, 14.2, 11.8.

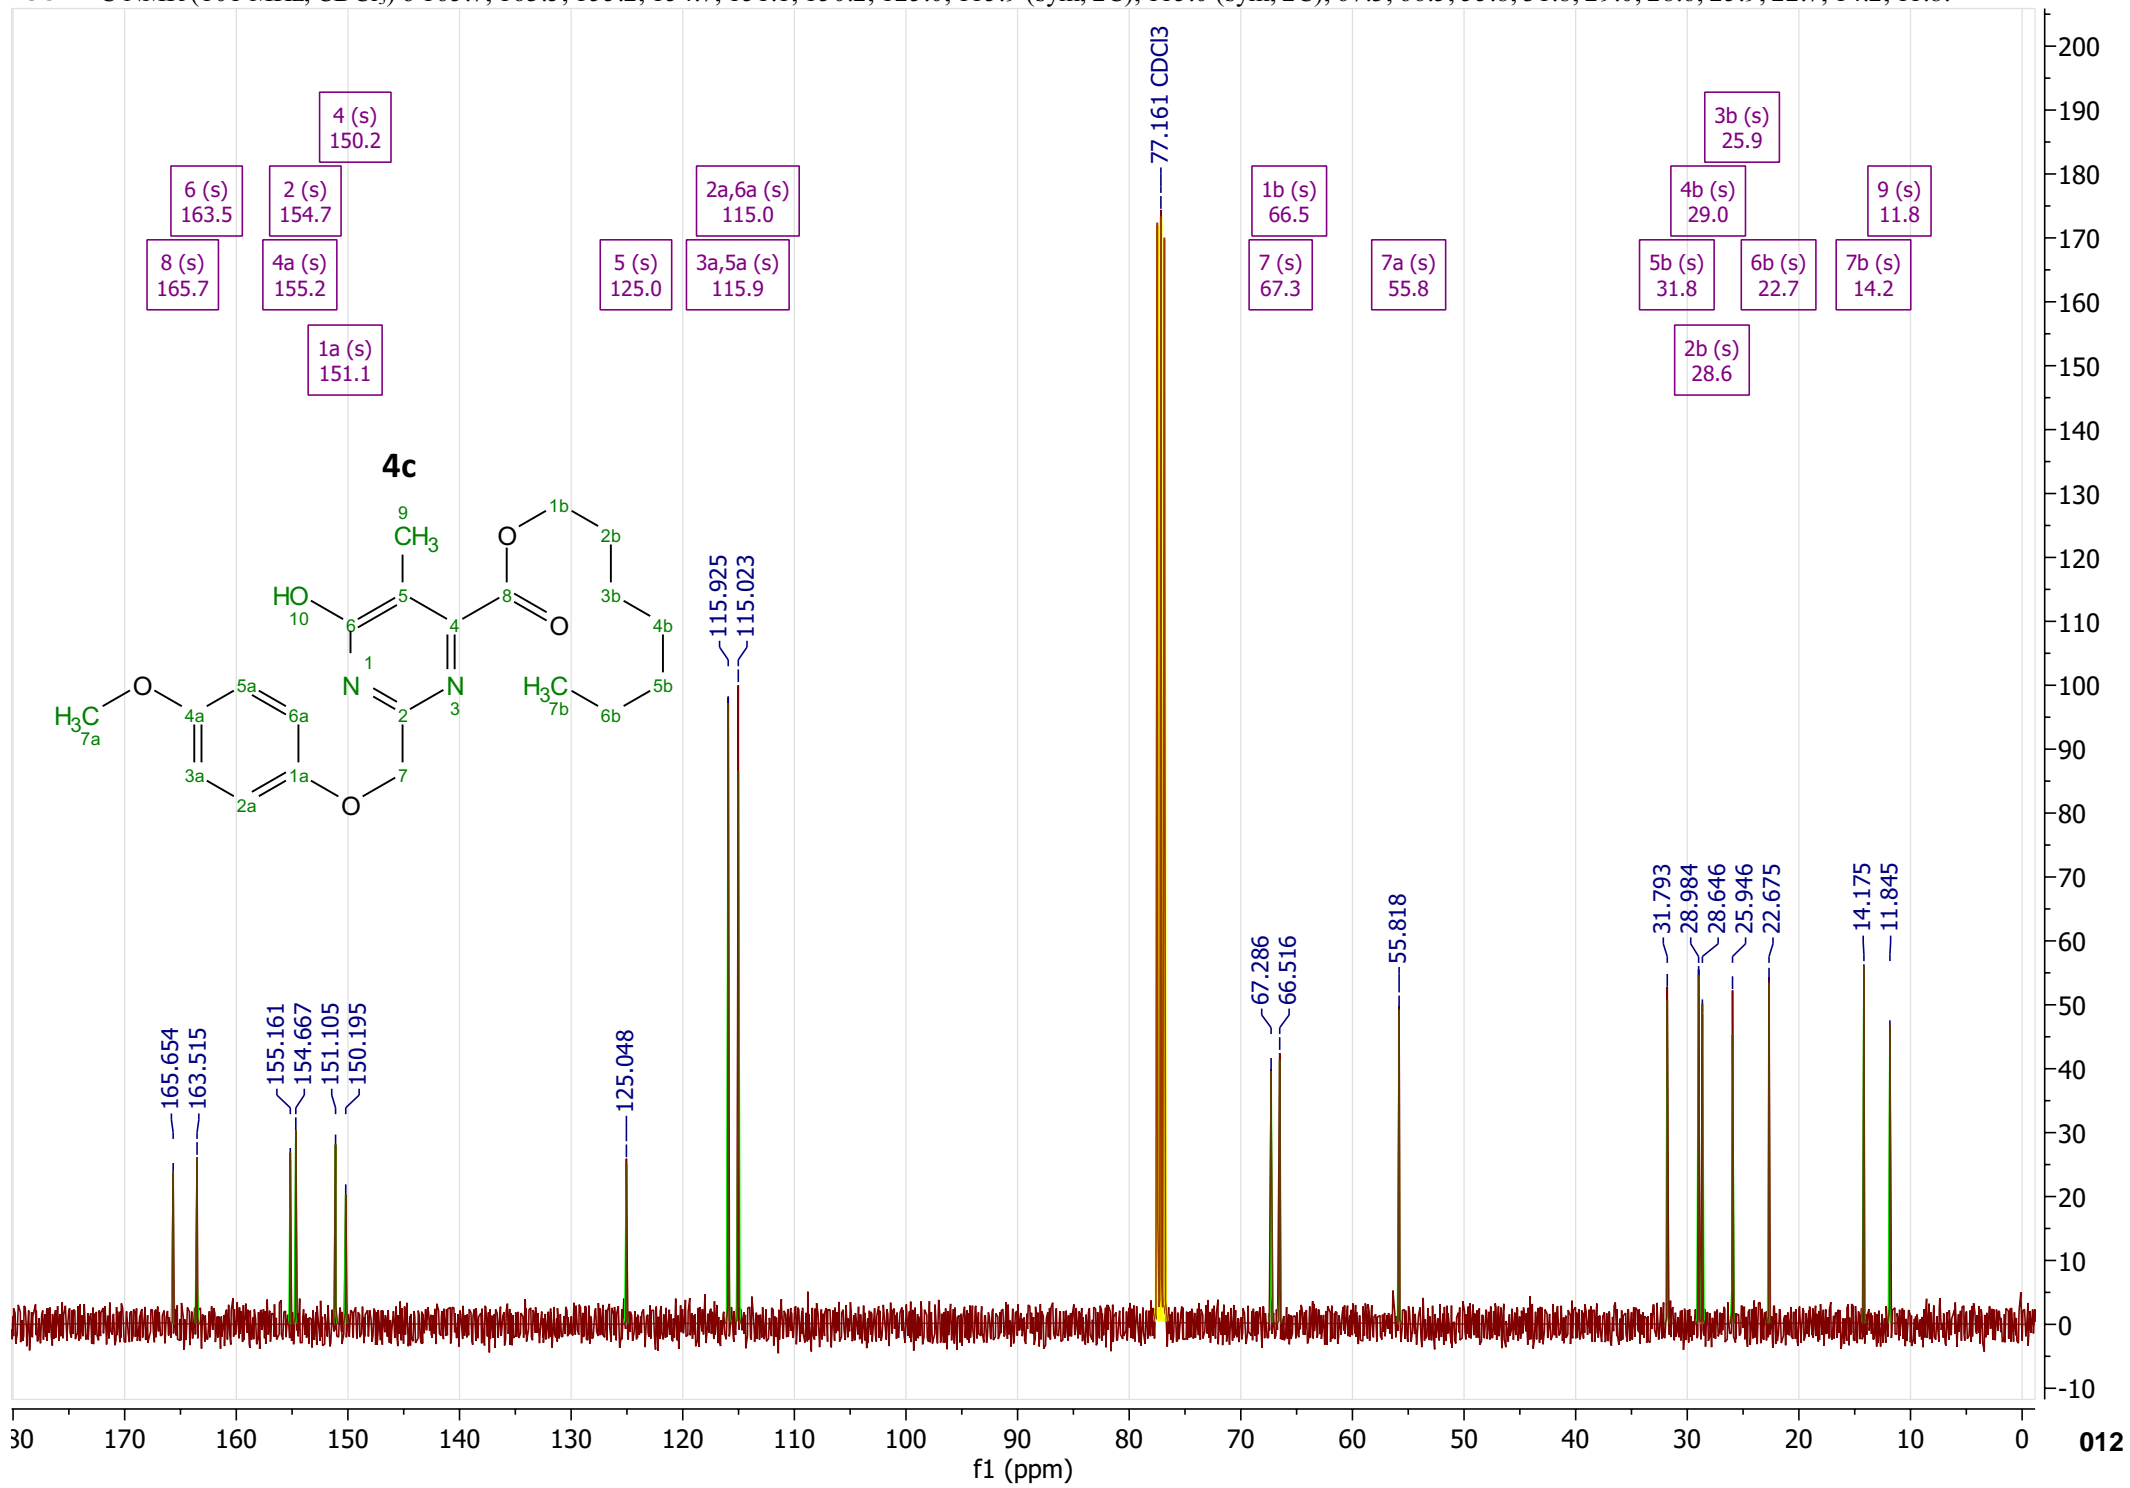

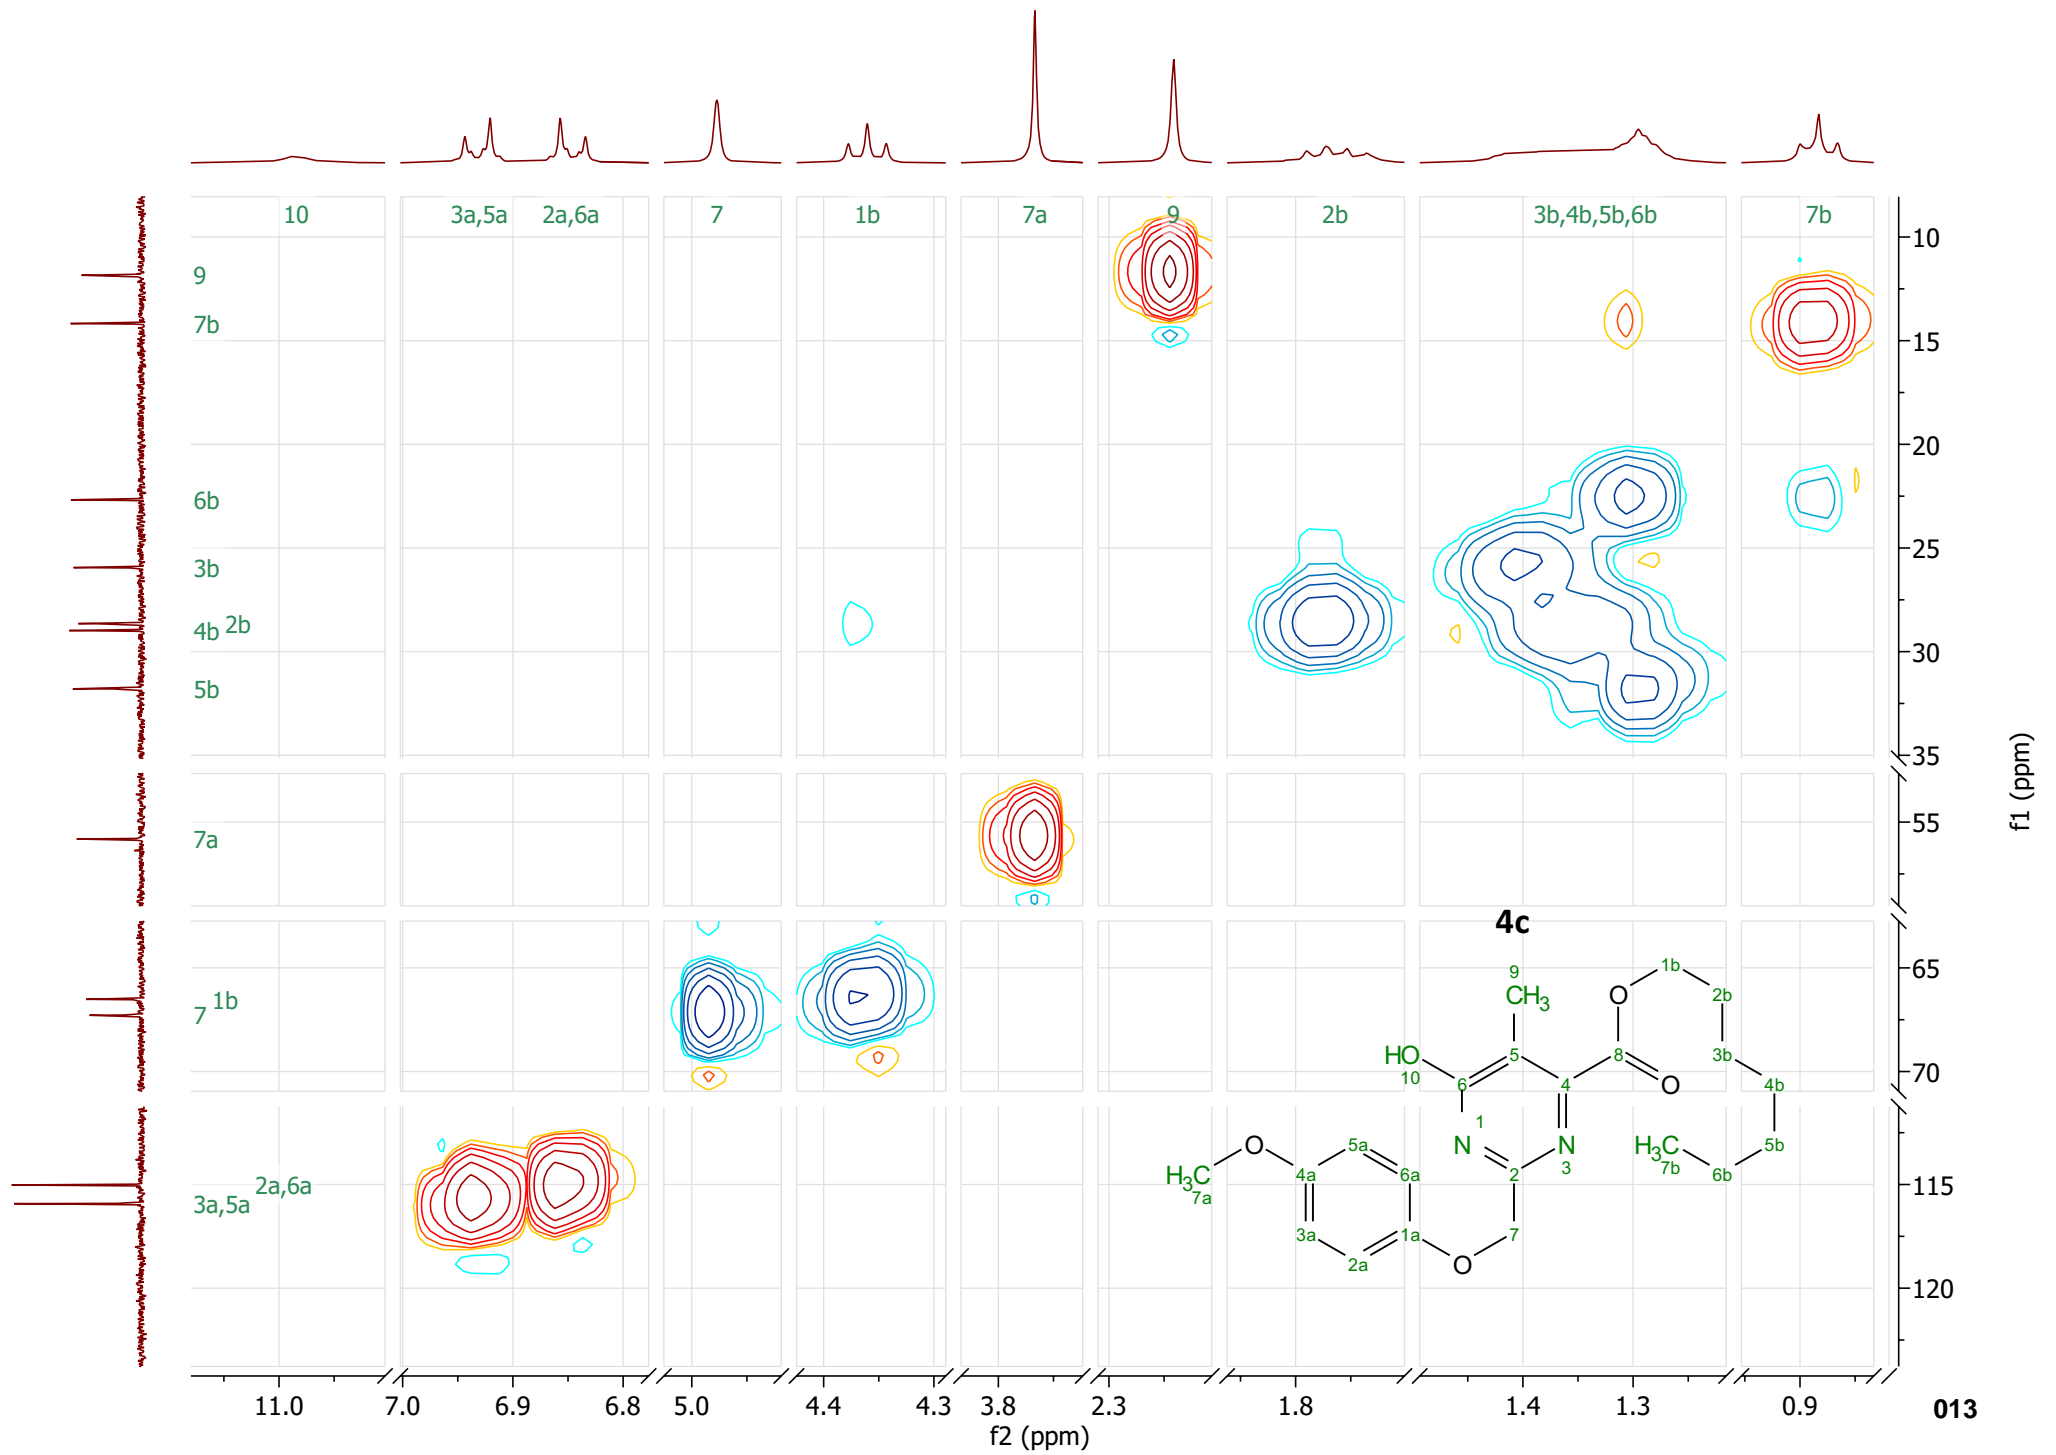

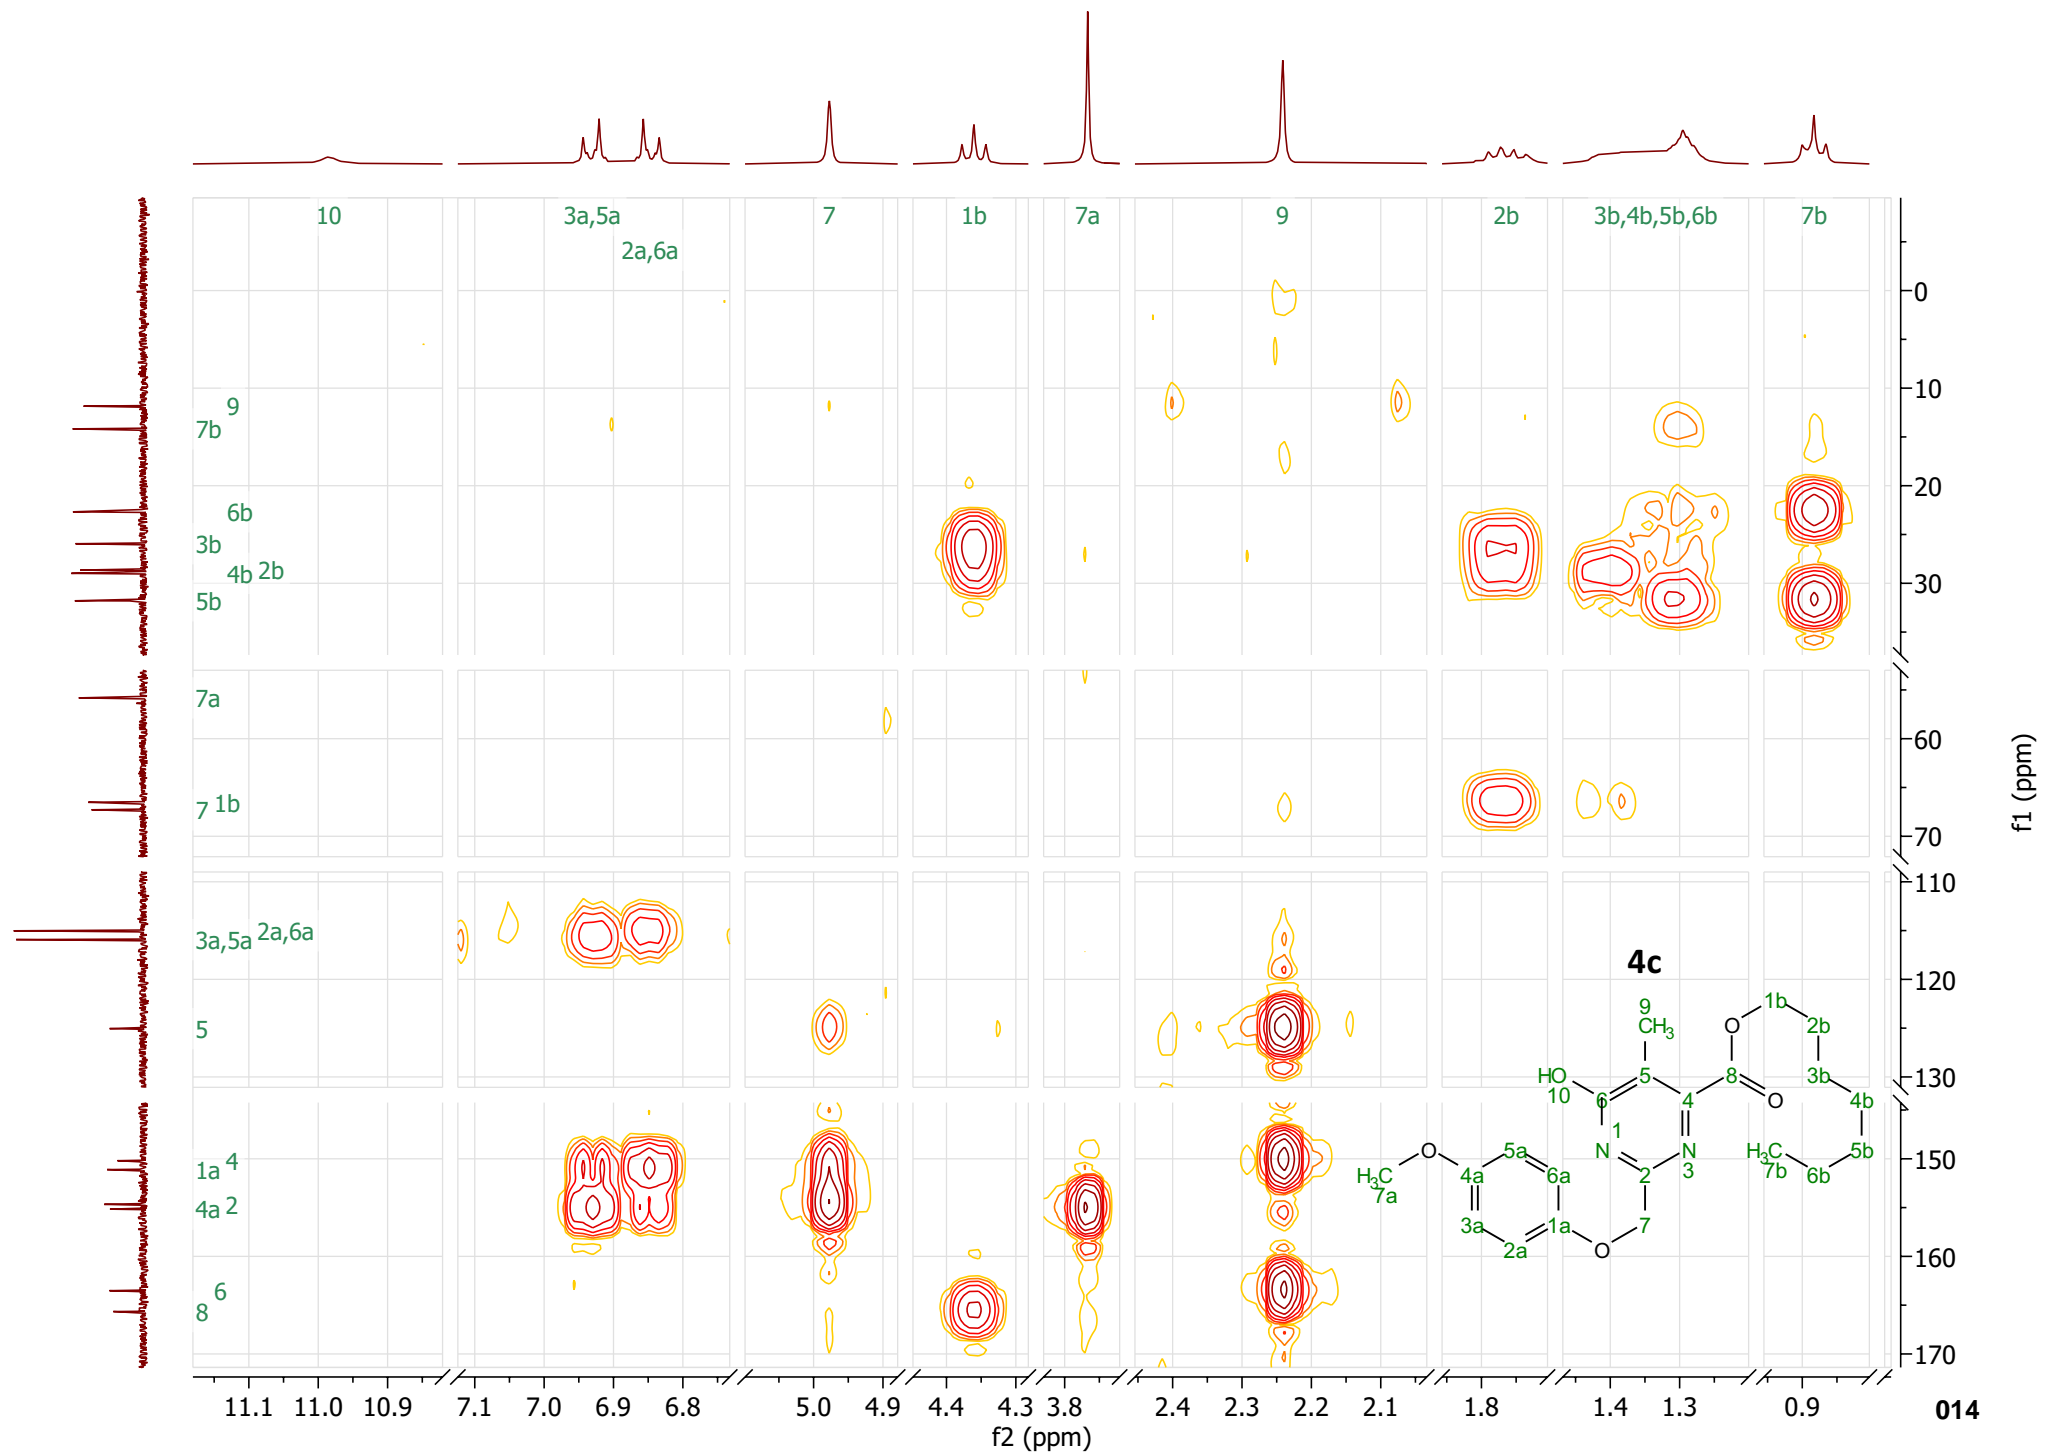

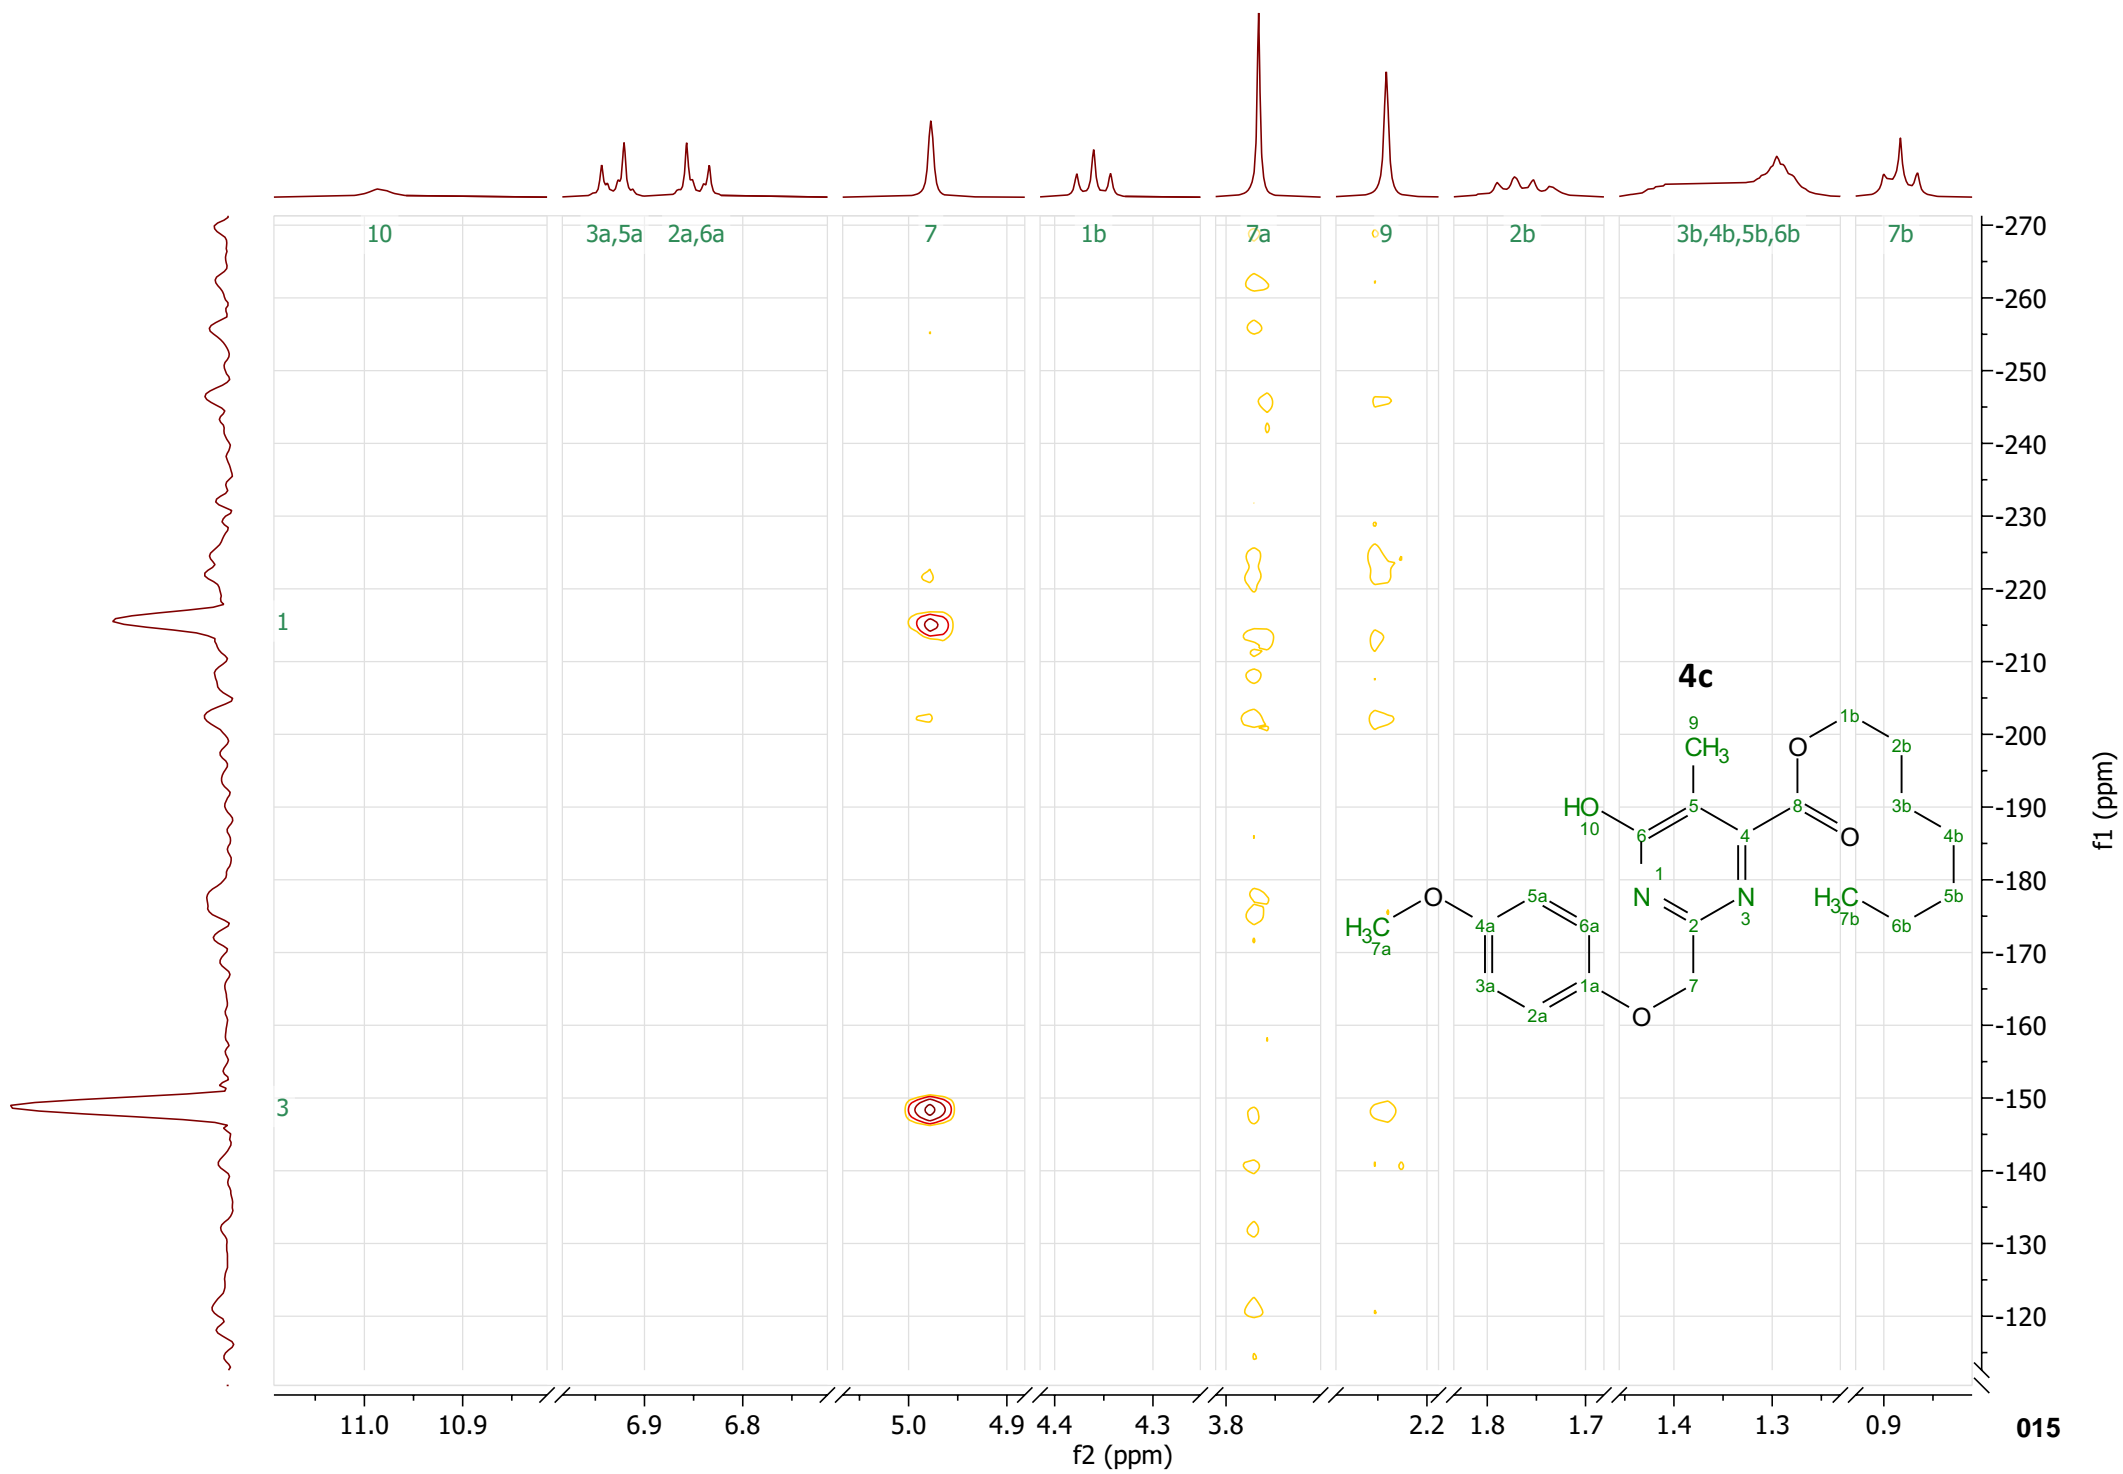

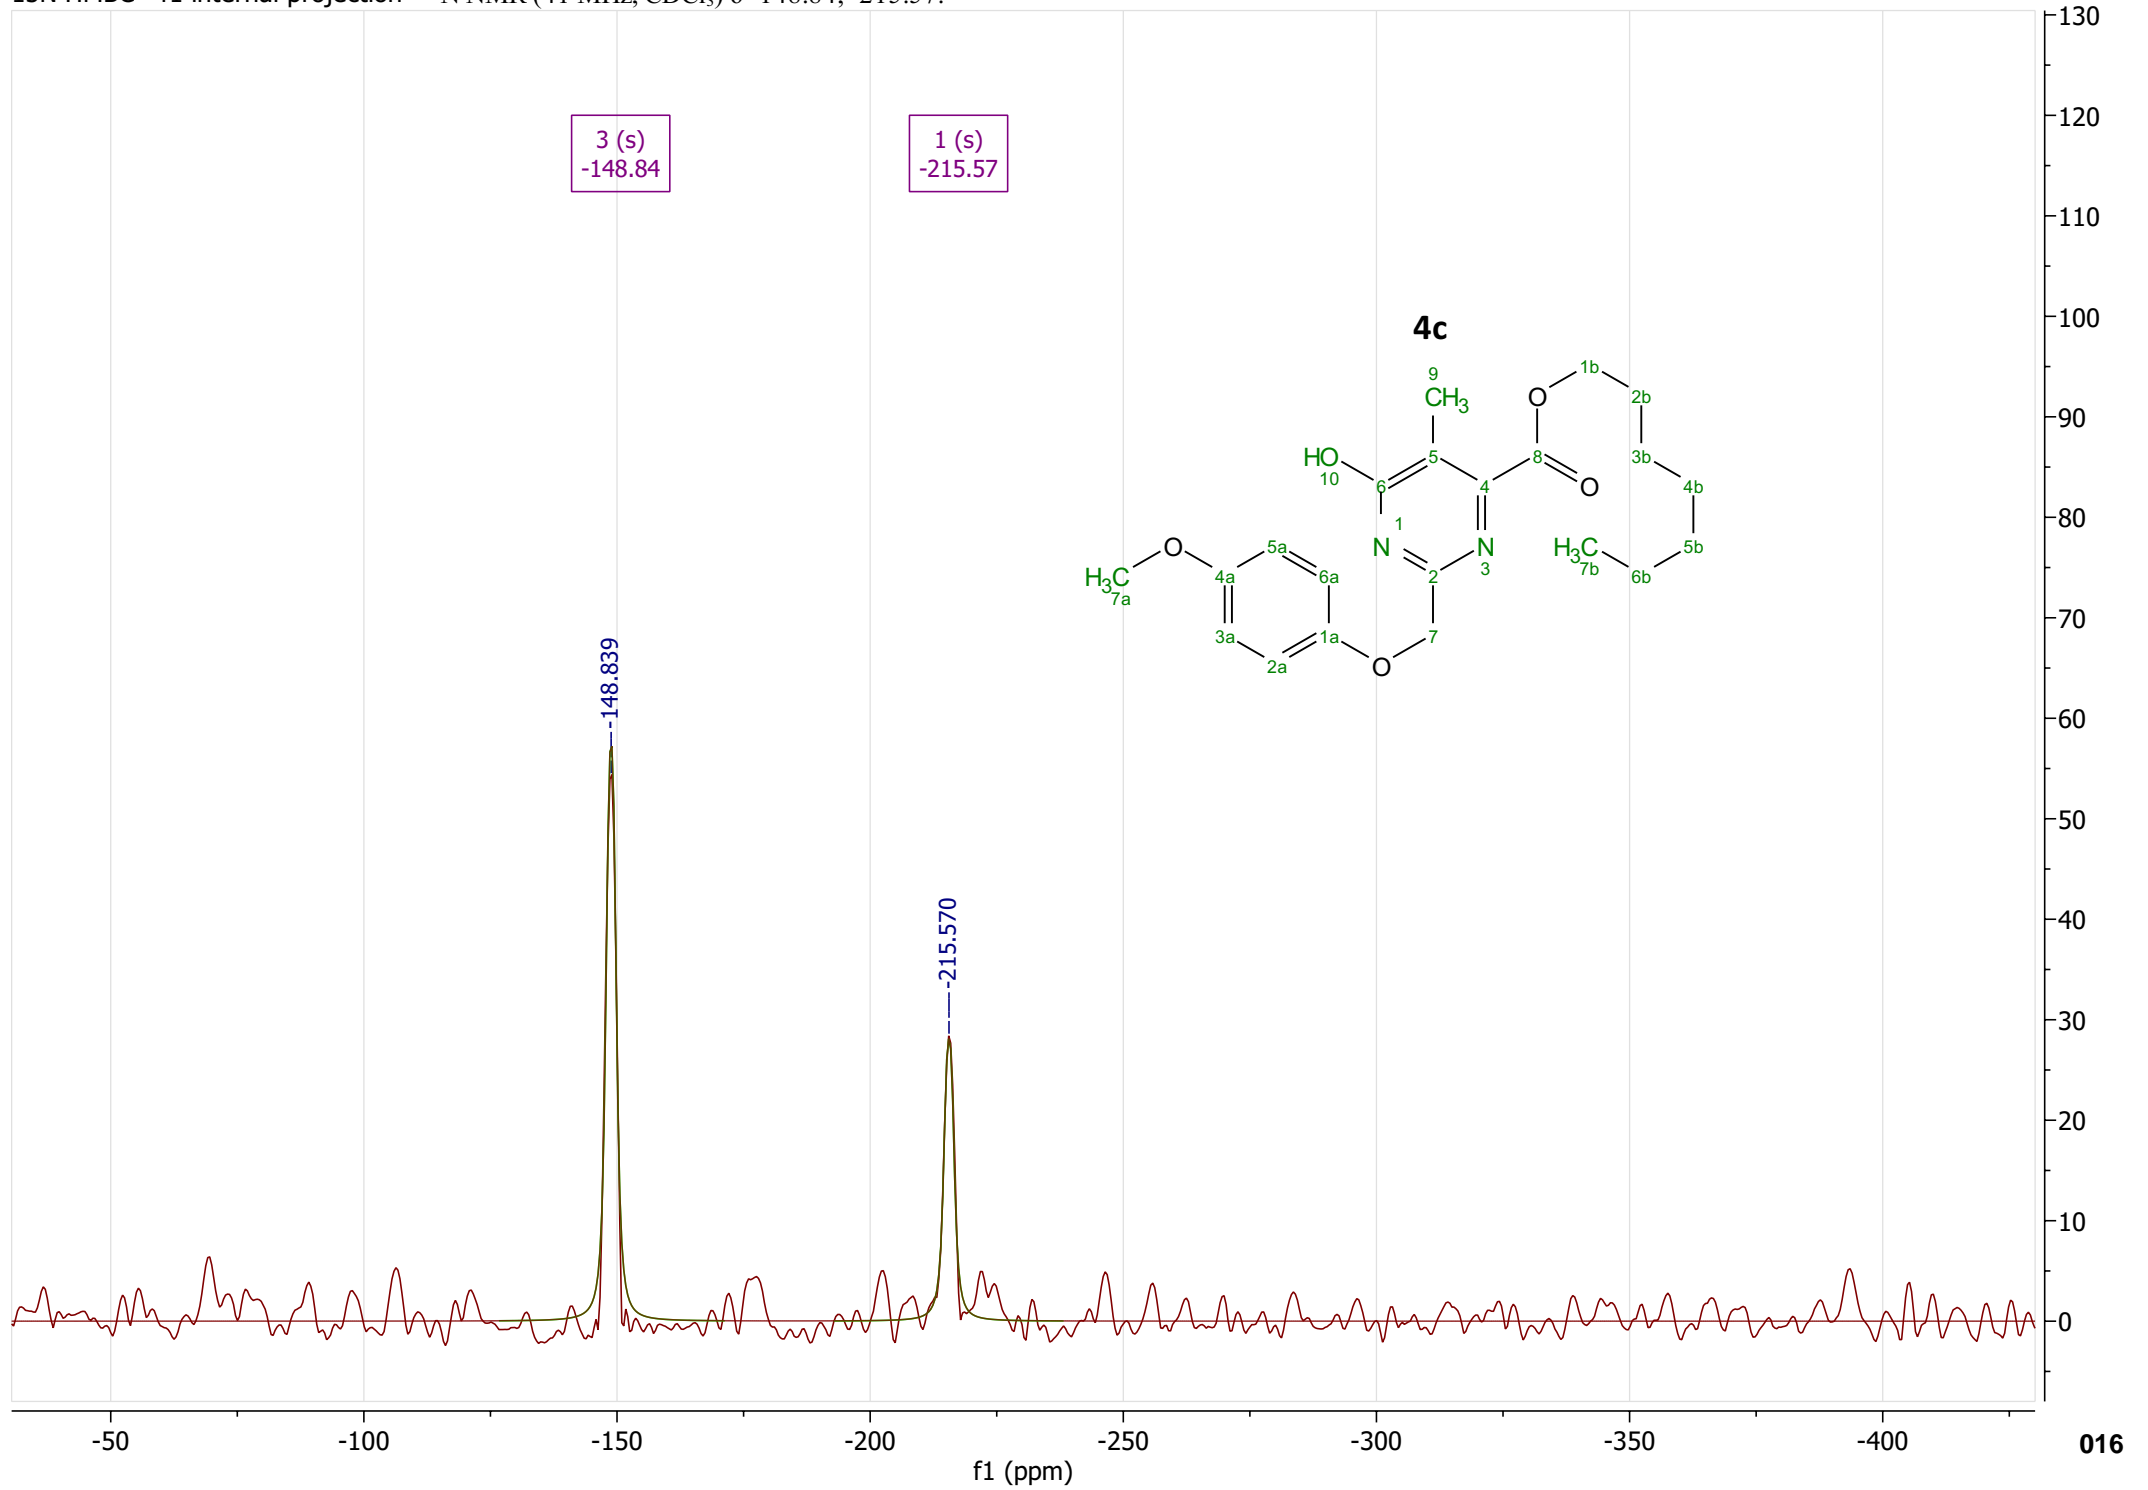



$^1\text{H}$  NMR (400 MHz,  $\text{CDCl}_3$ )  $\delta$  11.05 (br s, 1H), 7.03 – 6.89 (m, 2H), 6.89 – 6.75 (m, 2H), 4.98 (app d,  $J = 0.8$  Hz, 2H), 4.36 (t,  $J = 6.9$  Hz, 2H), 3.77 (s, 3H), 2.24 (app t,  $J = 0.7$  Hz, 3H), 1.86 – 1.67 (m, 2H), 1.47 – 1.36 (m, 2H), 1.36 – 1.18 (m, 8H), 0.88 (app t,  $J = 6.9$  Hz, 3H).

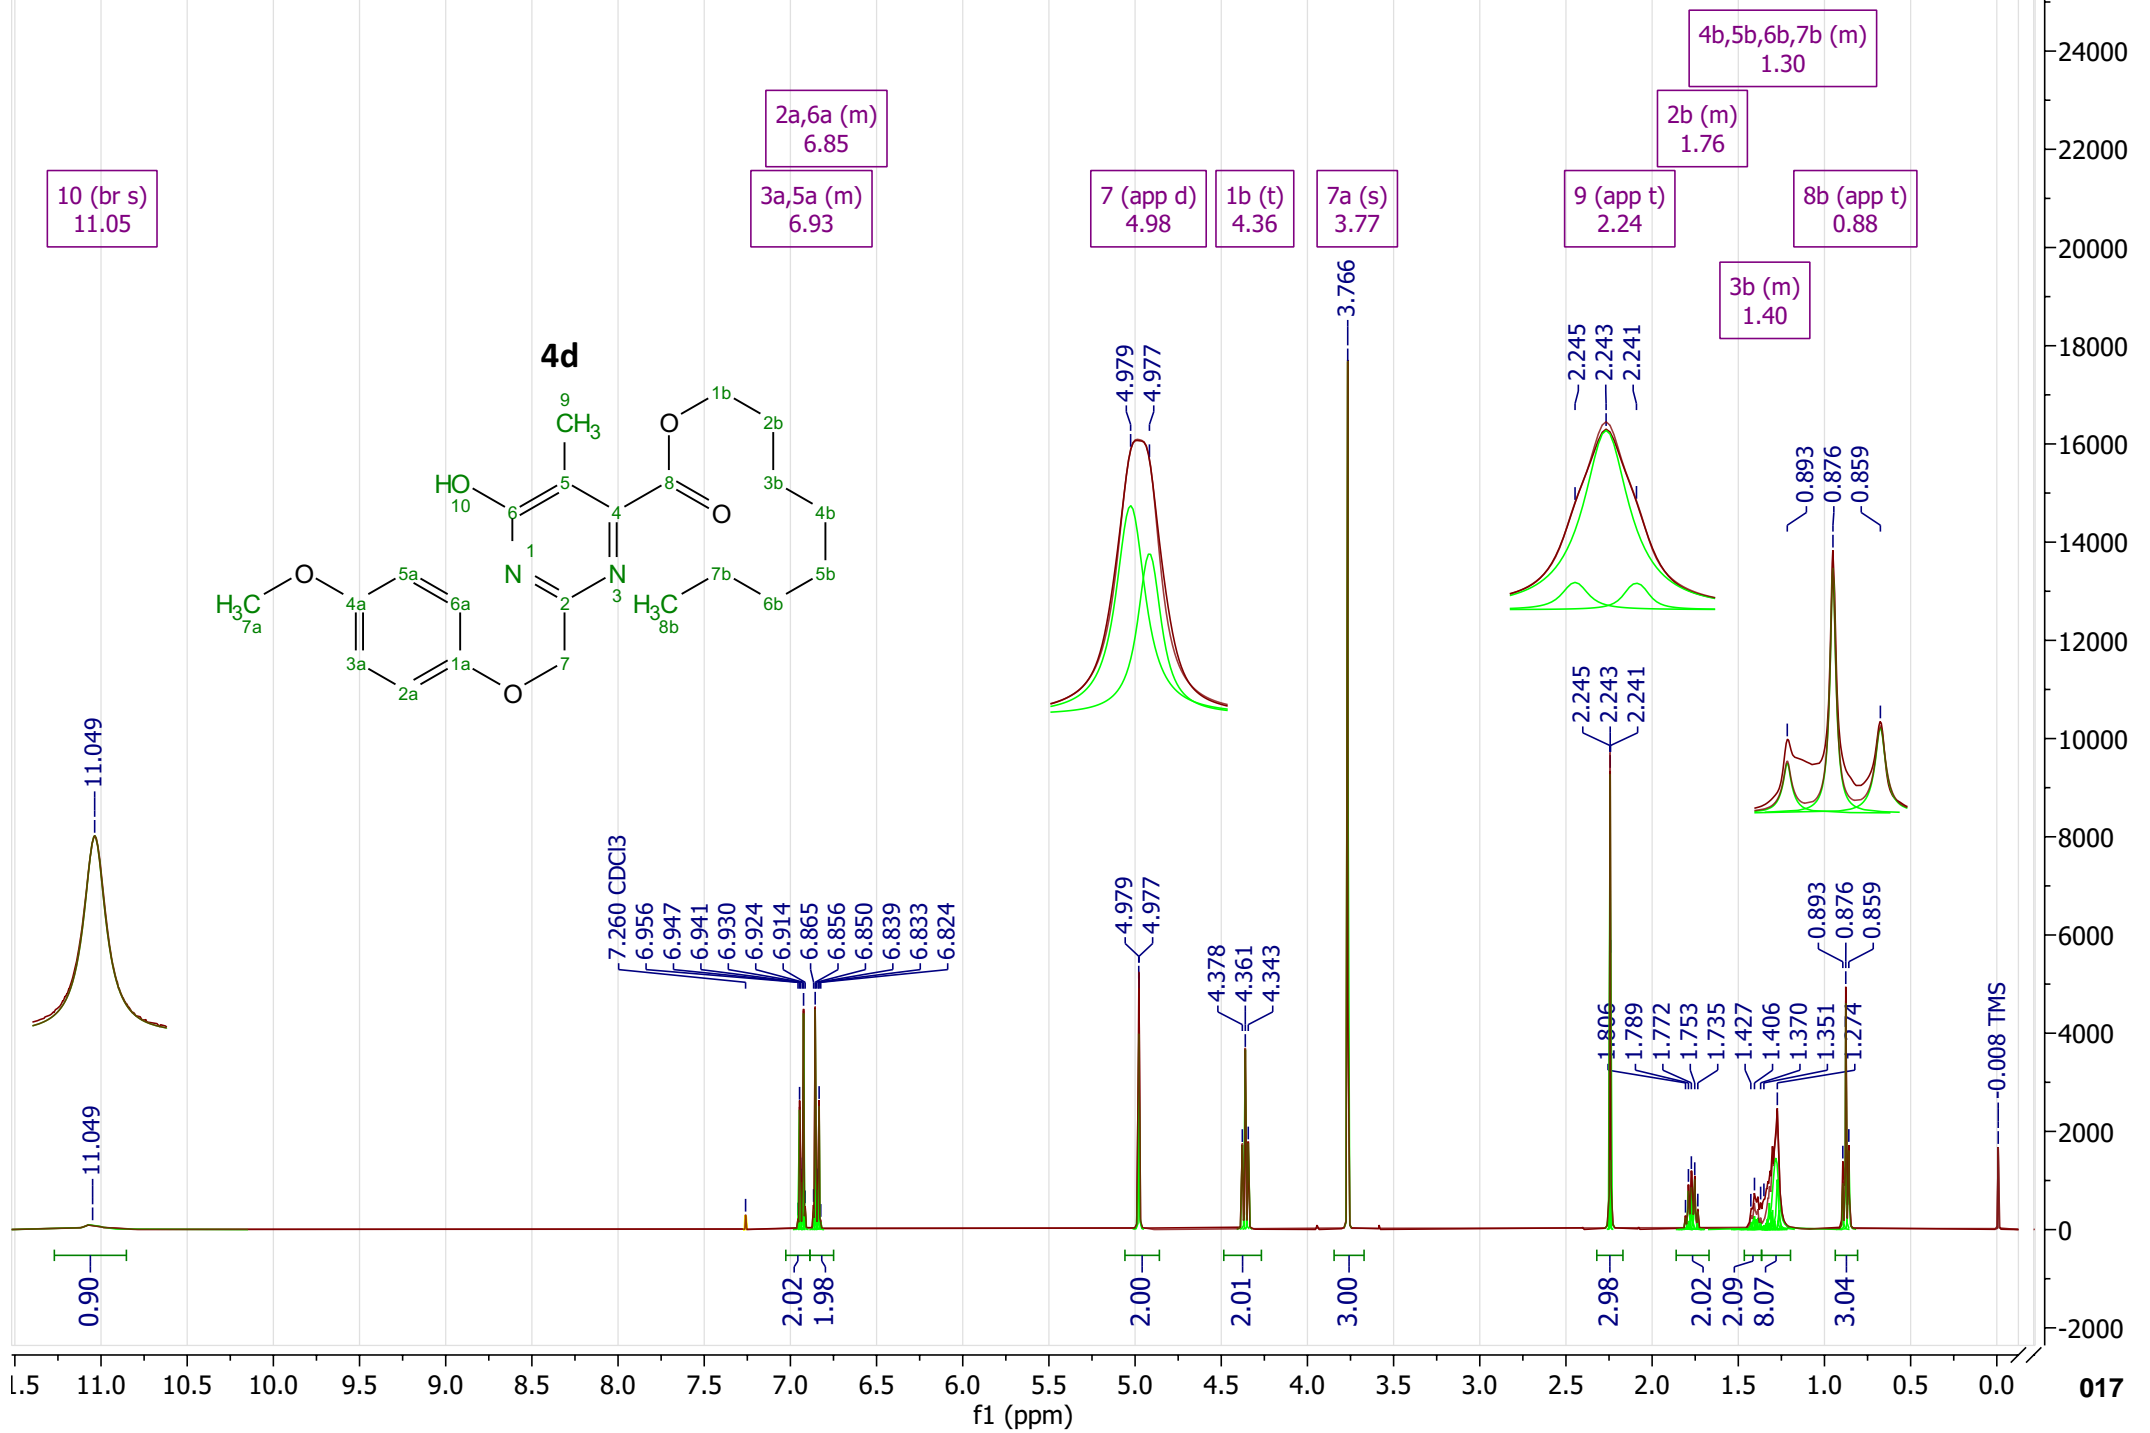

**13C** <sup>13</sup>C NMR (101 MHz, CDCl<sub>3</sub>) δ 165.6, 163.6, 155.2, 154.7, 151.1, 150.0, 125.1, 115.9 (sym, 2C), 115.0 (sym, 2C), 67.3, 66.5, 55.8, 31.9, 29.28, 29.26, 28.6, 26.0, 22.7, 14.2, 11.9.

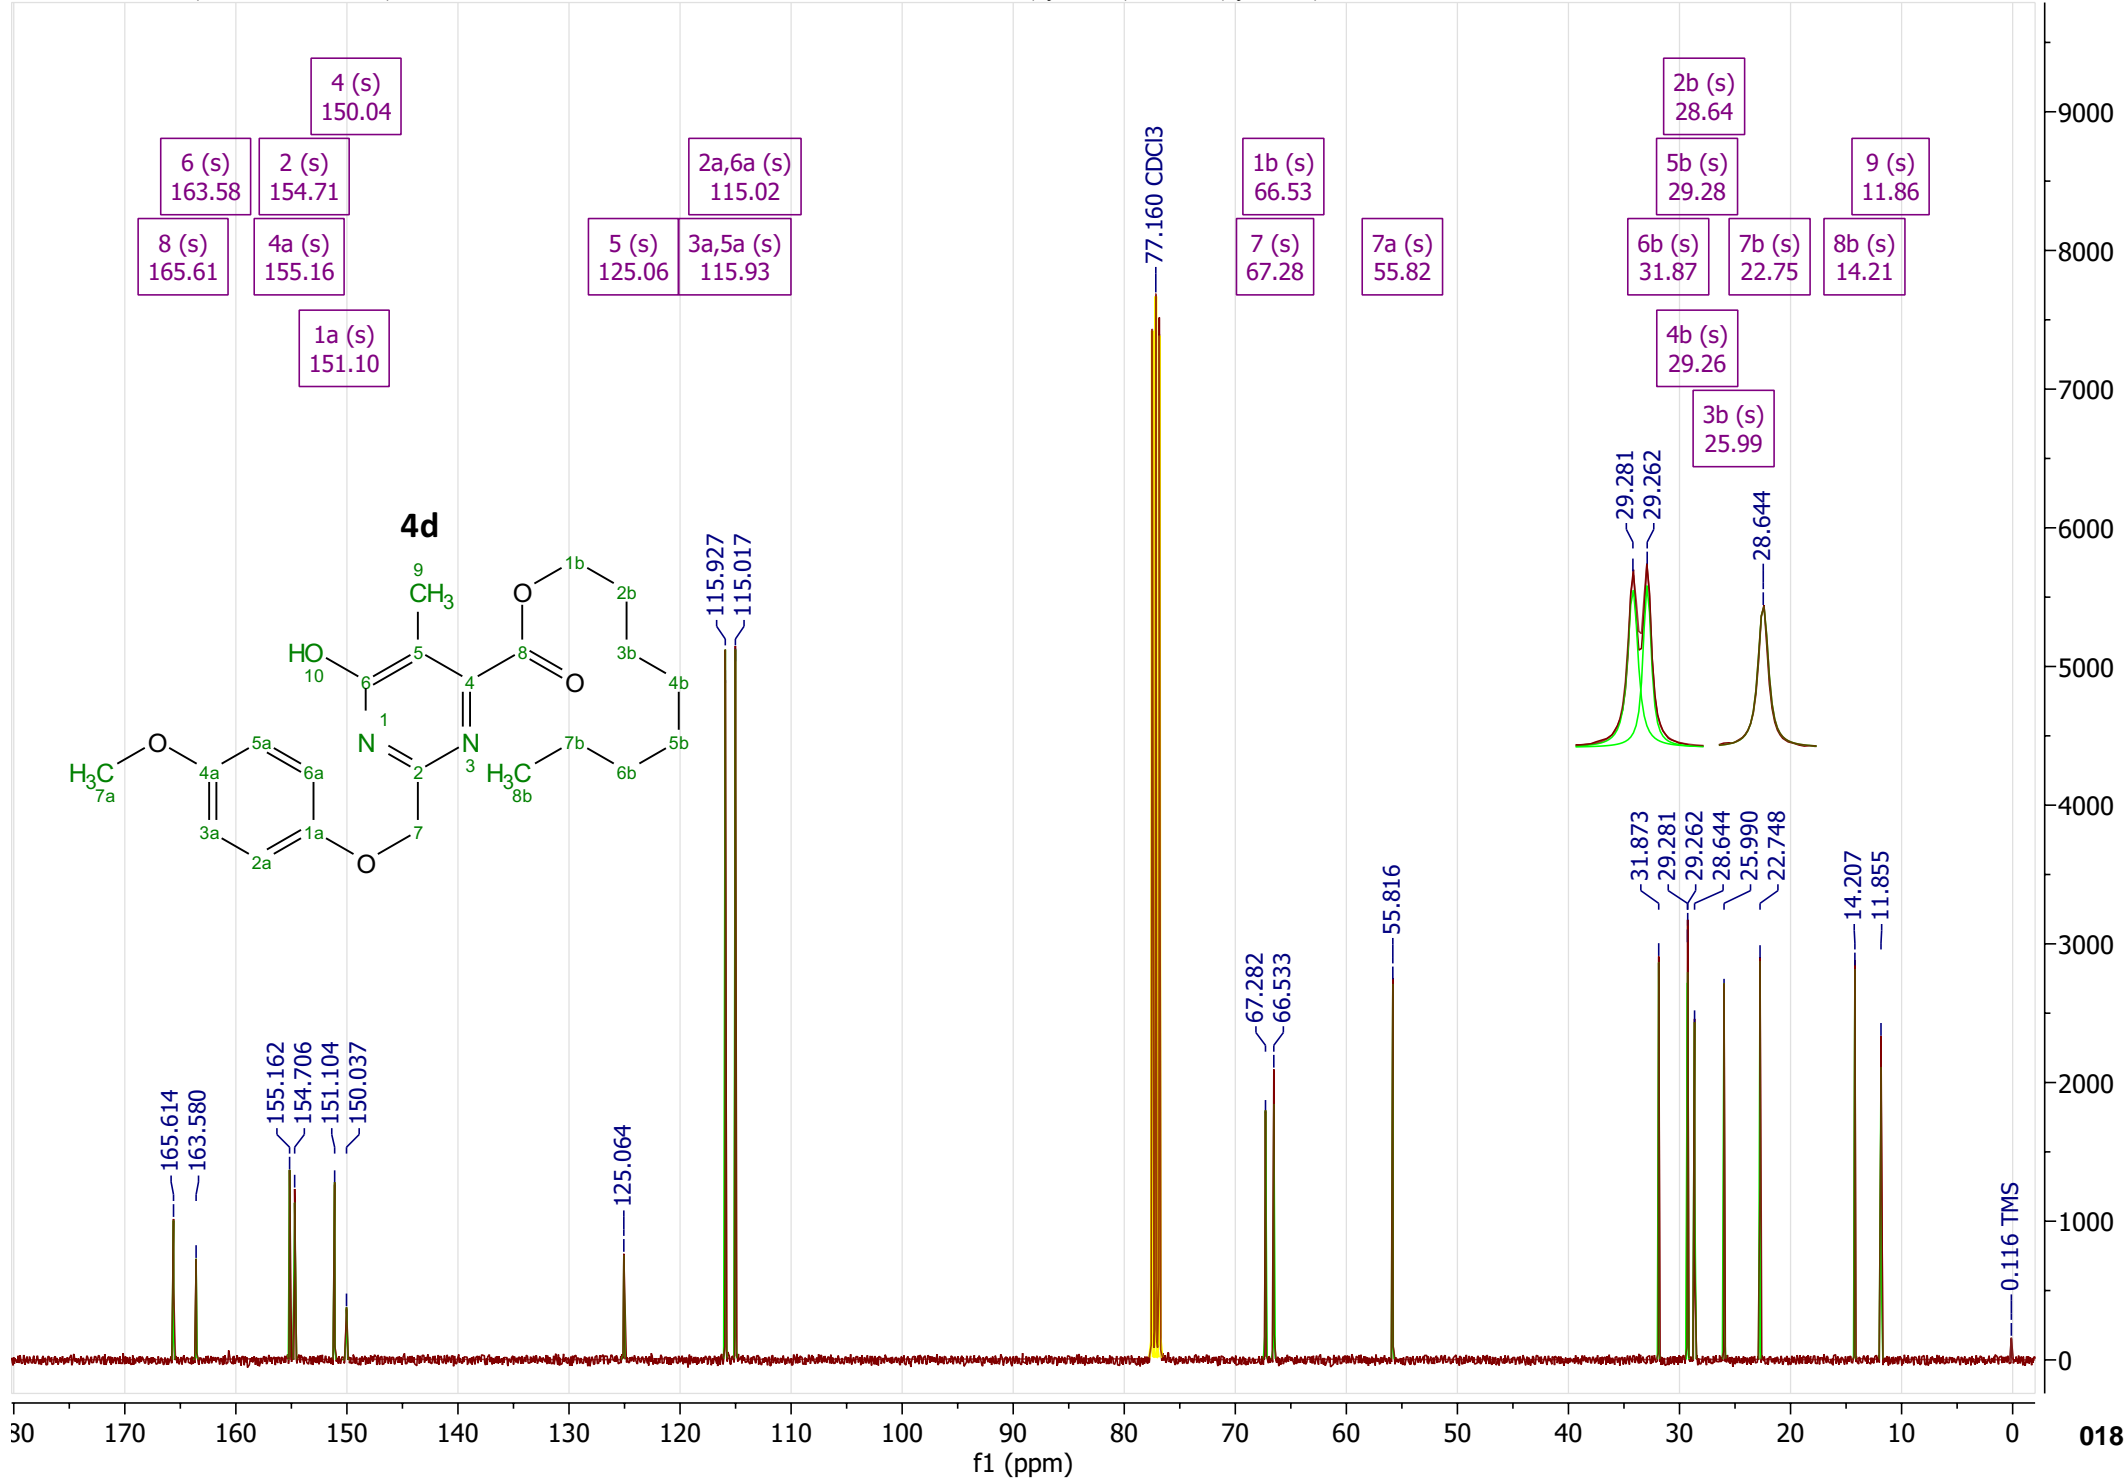

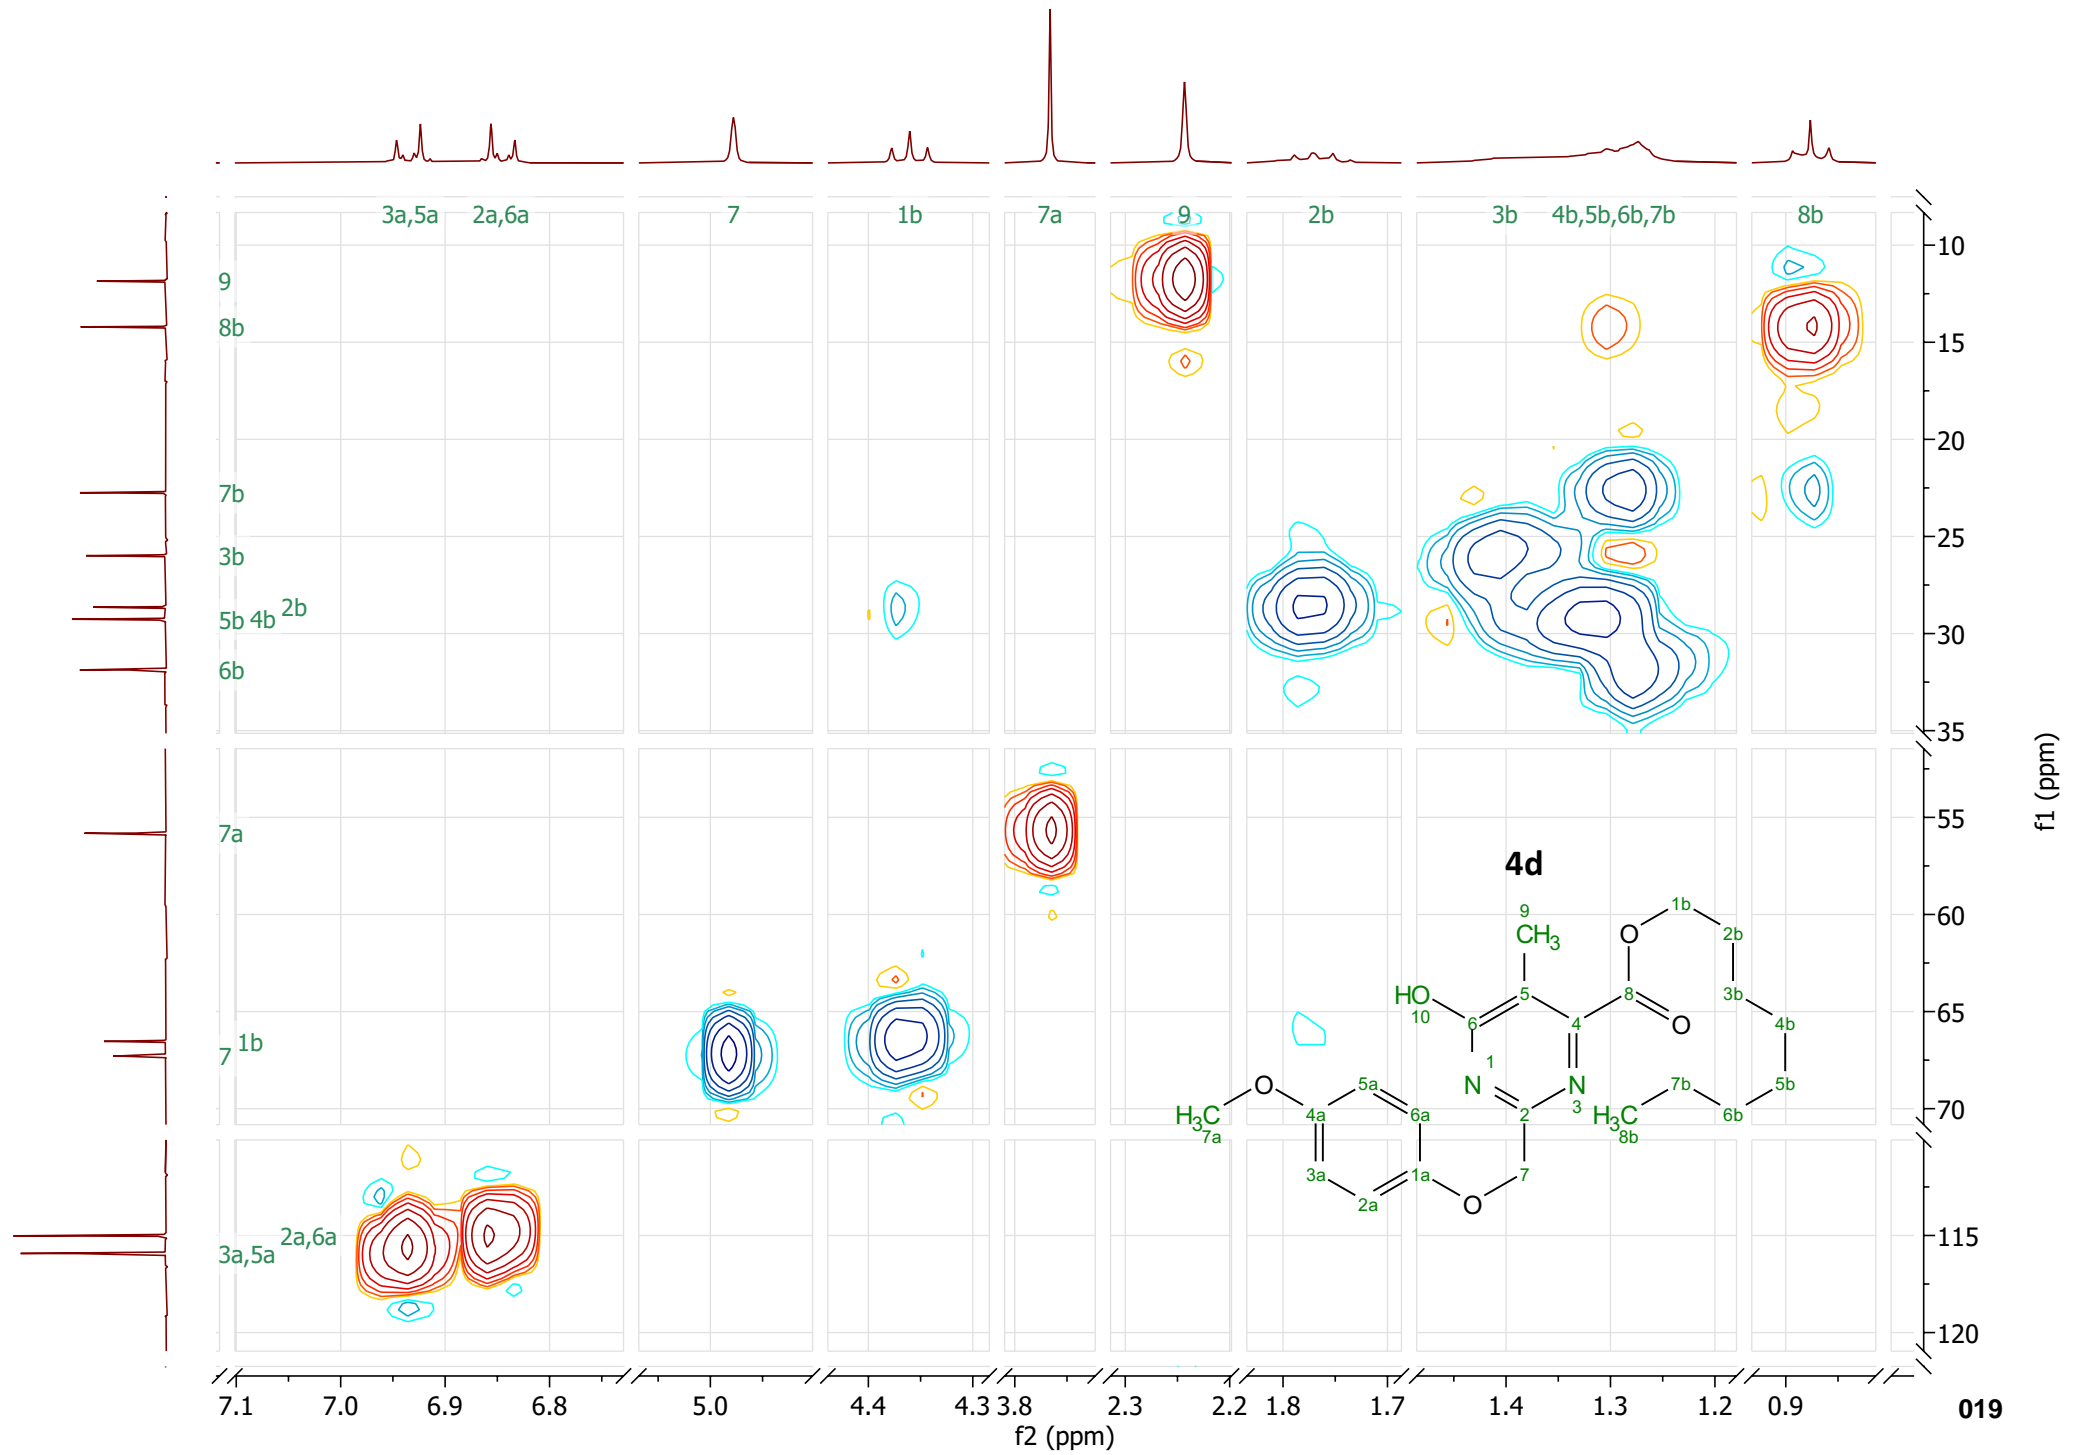

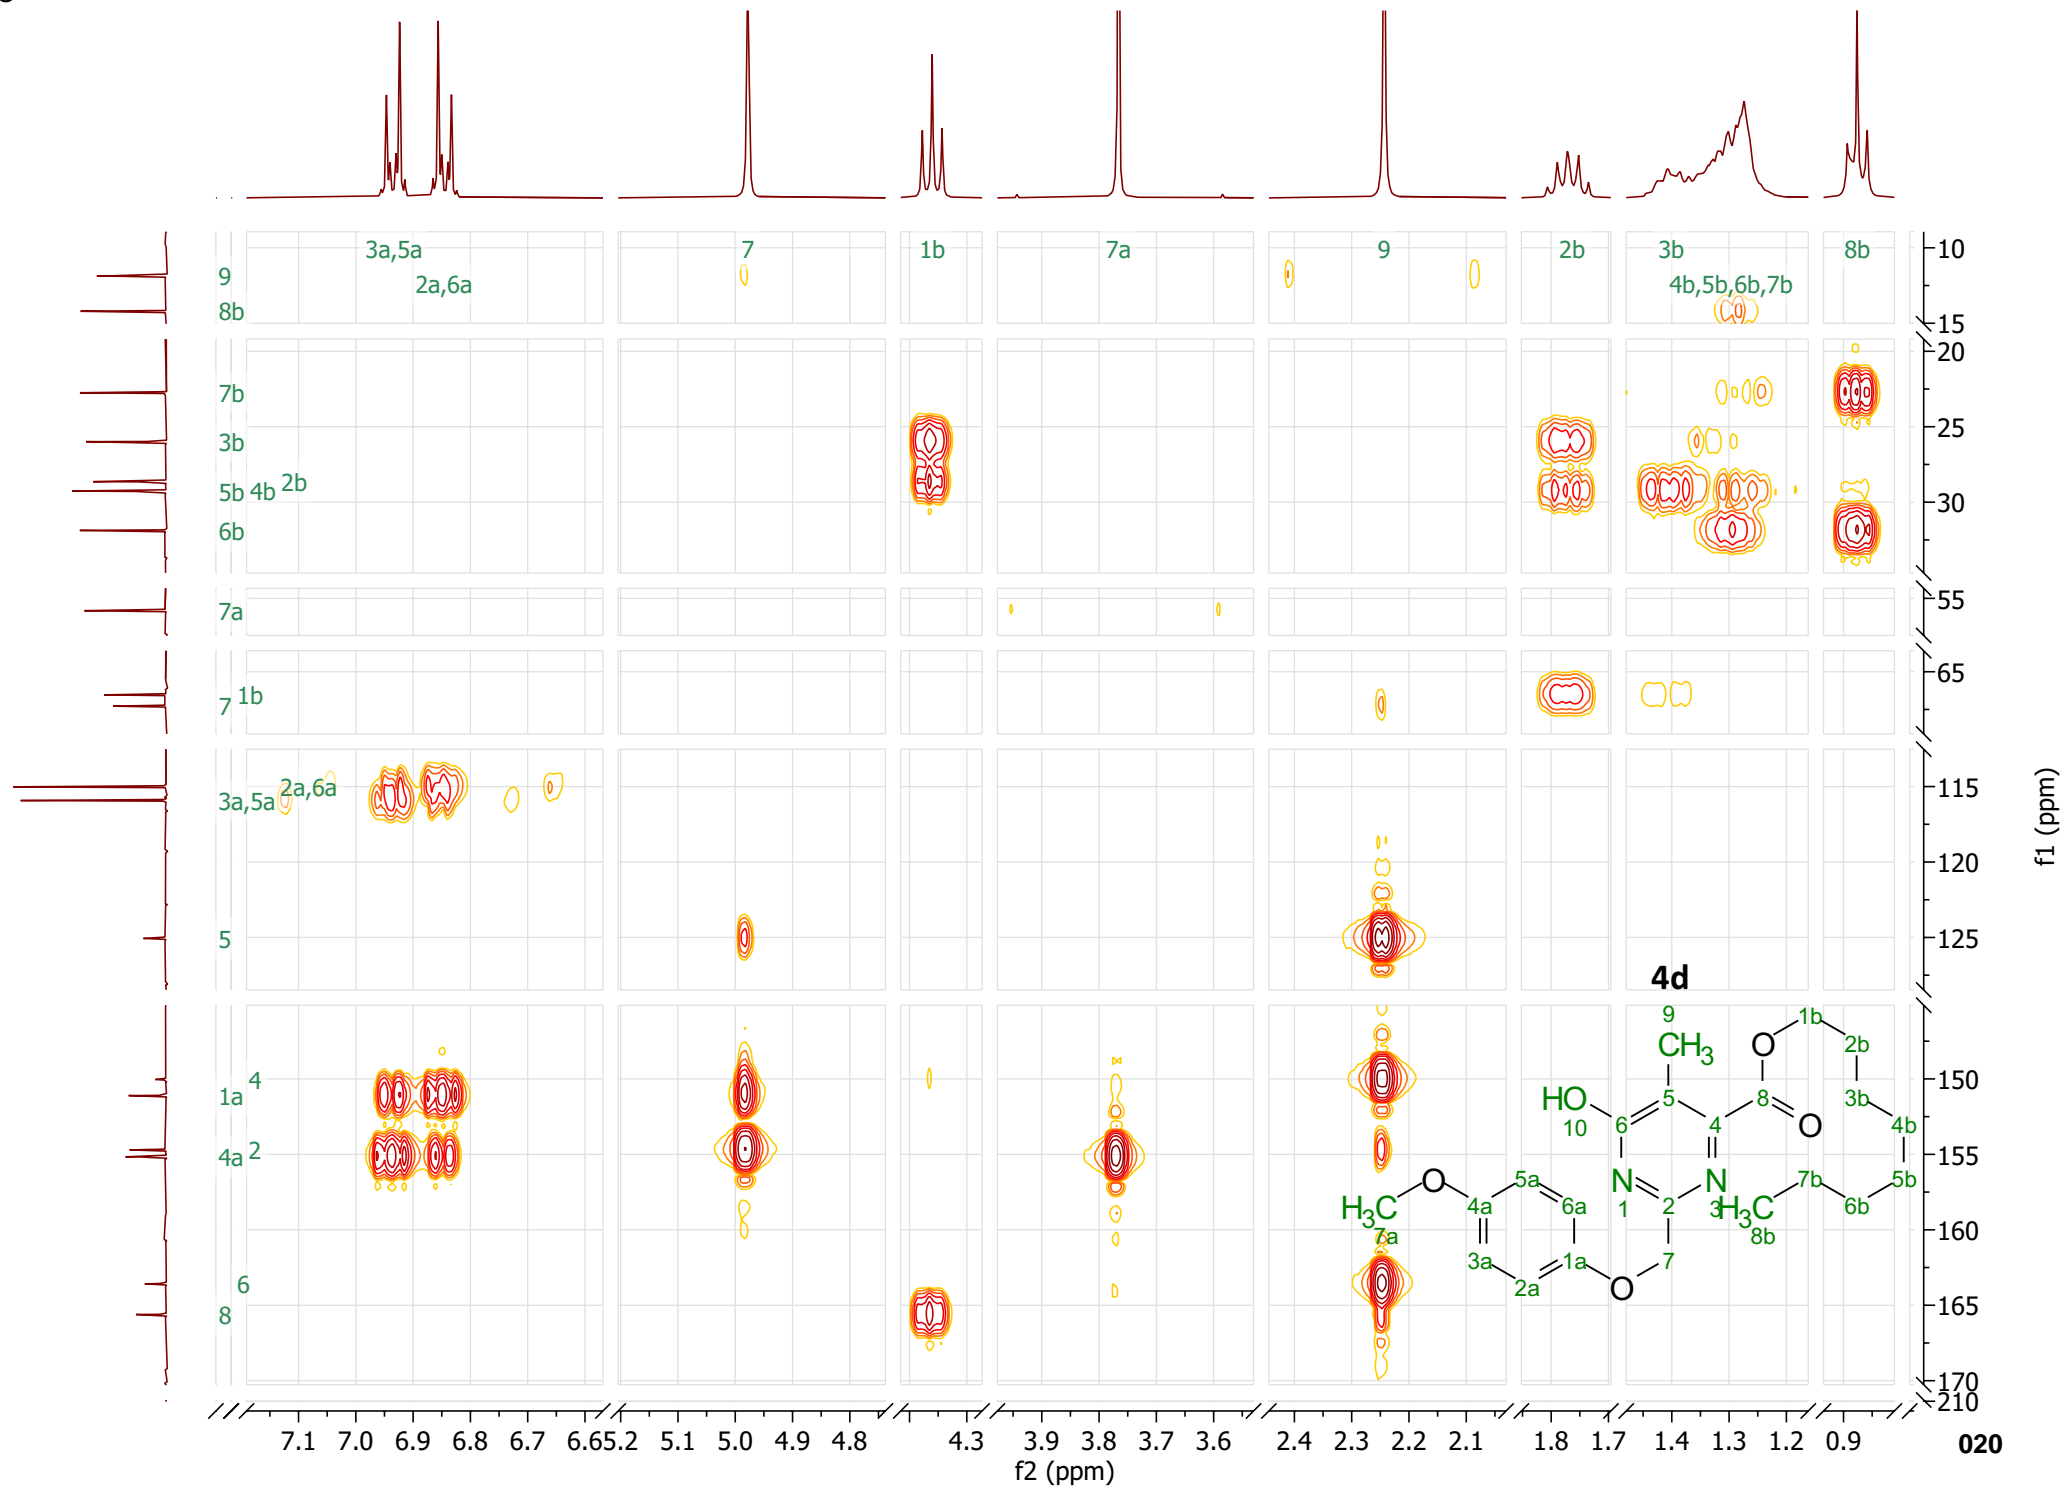

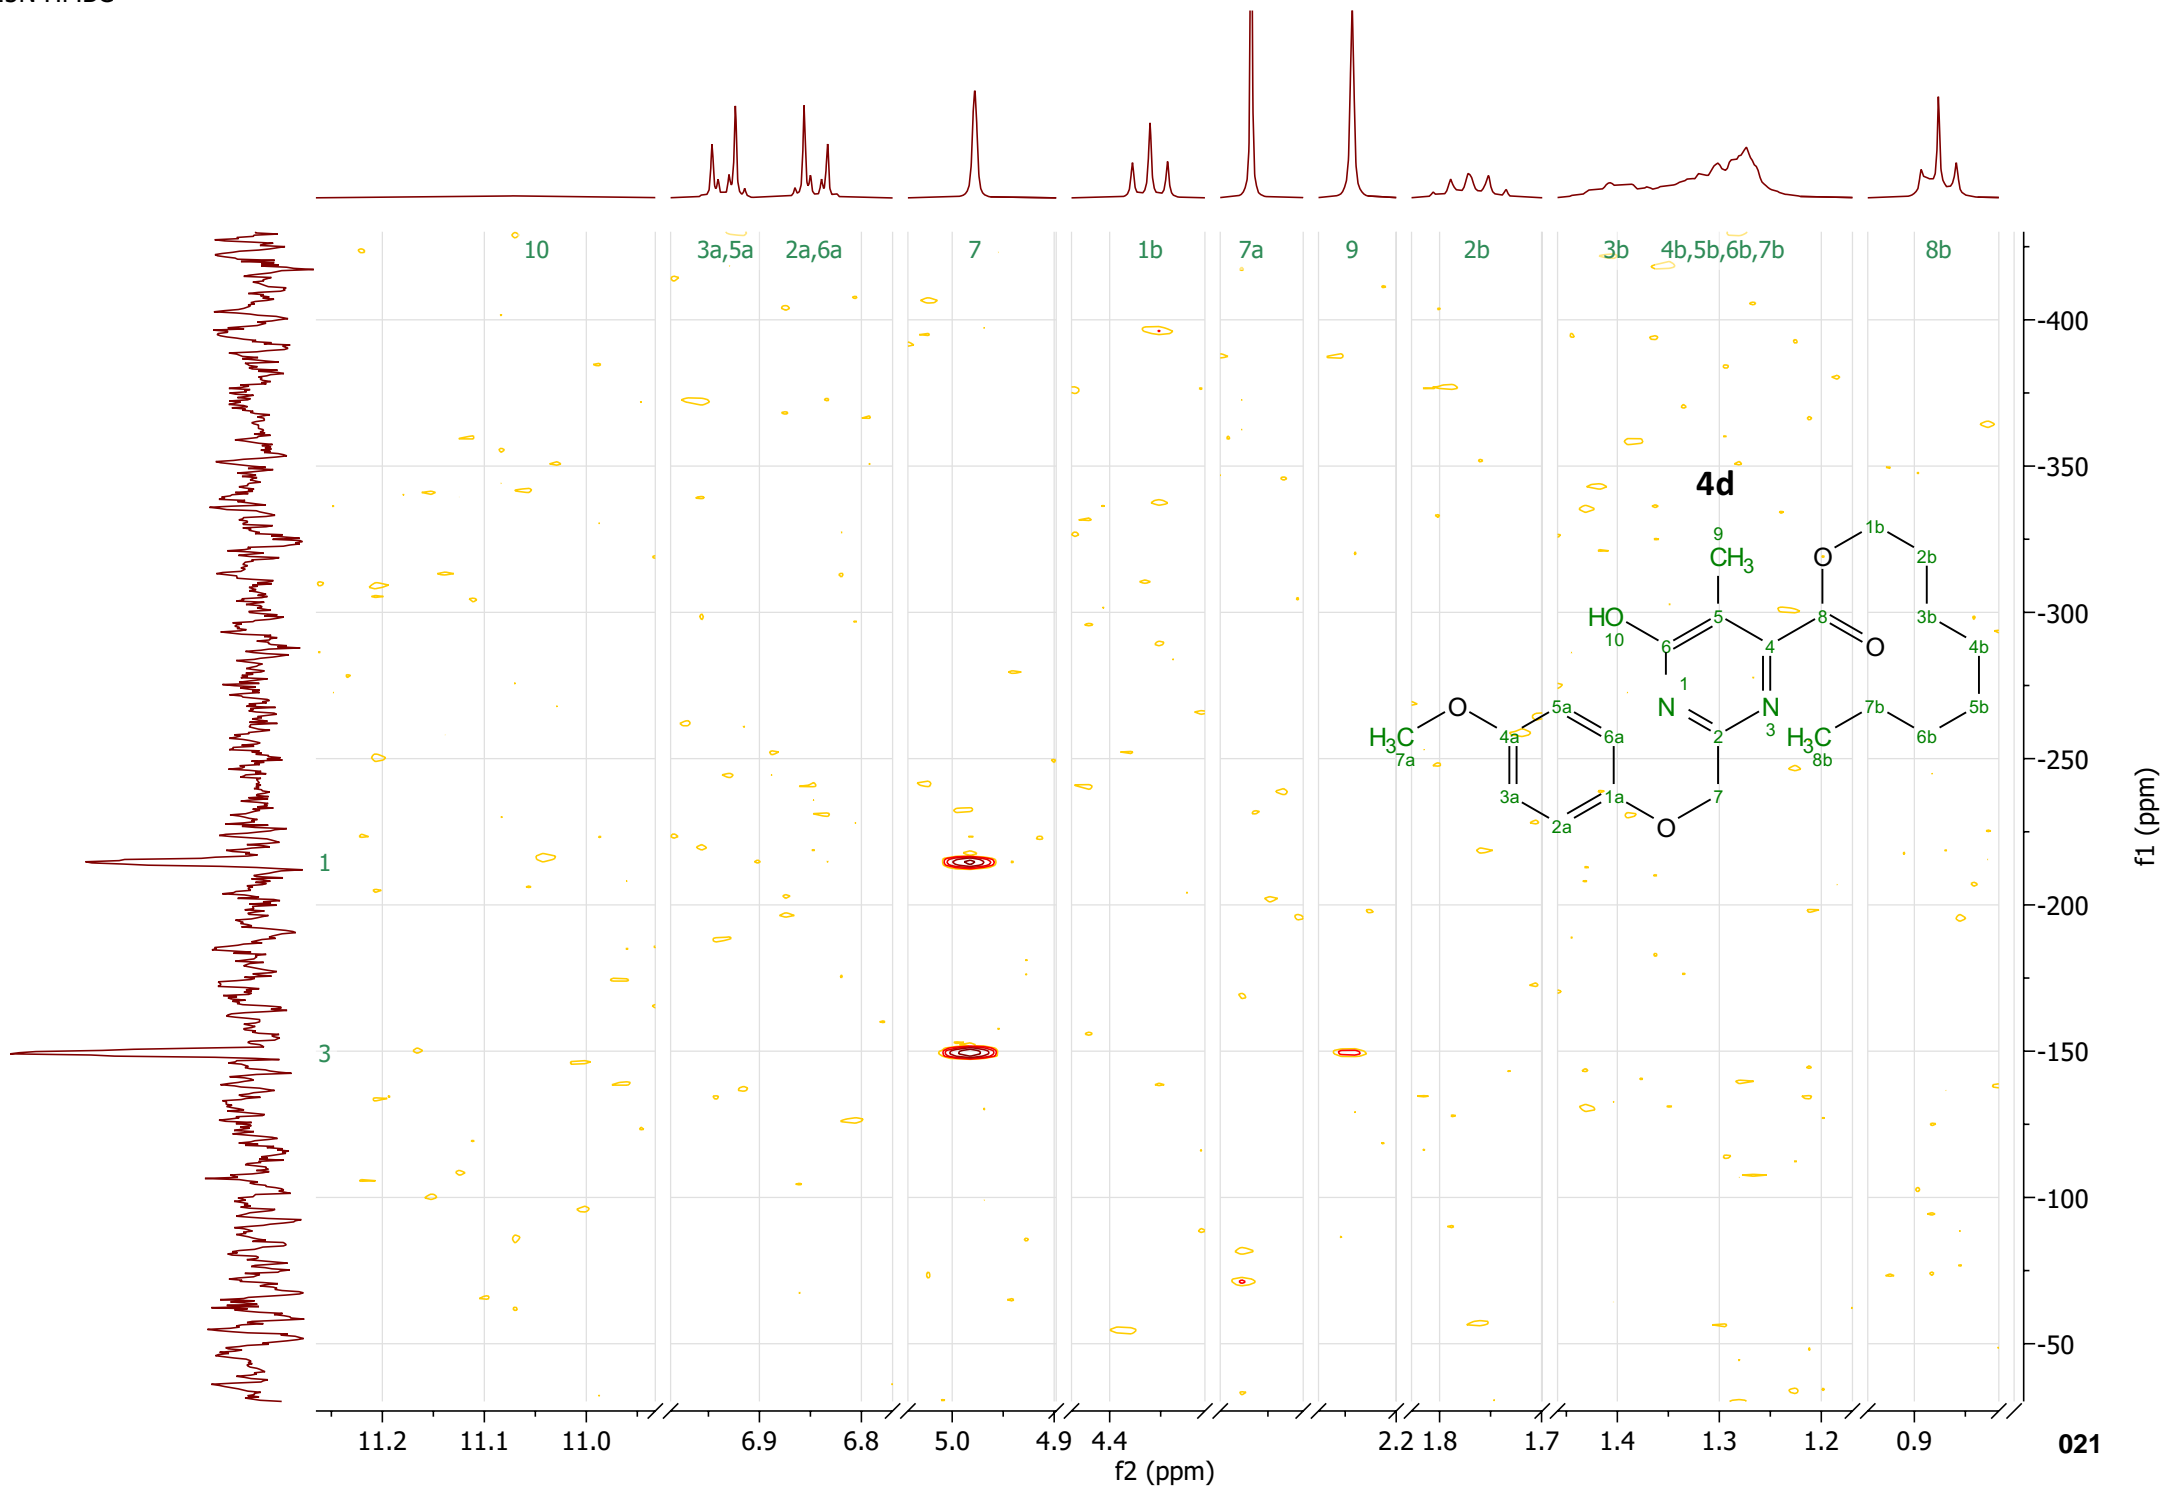

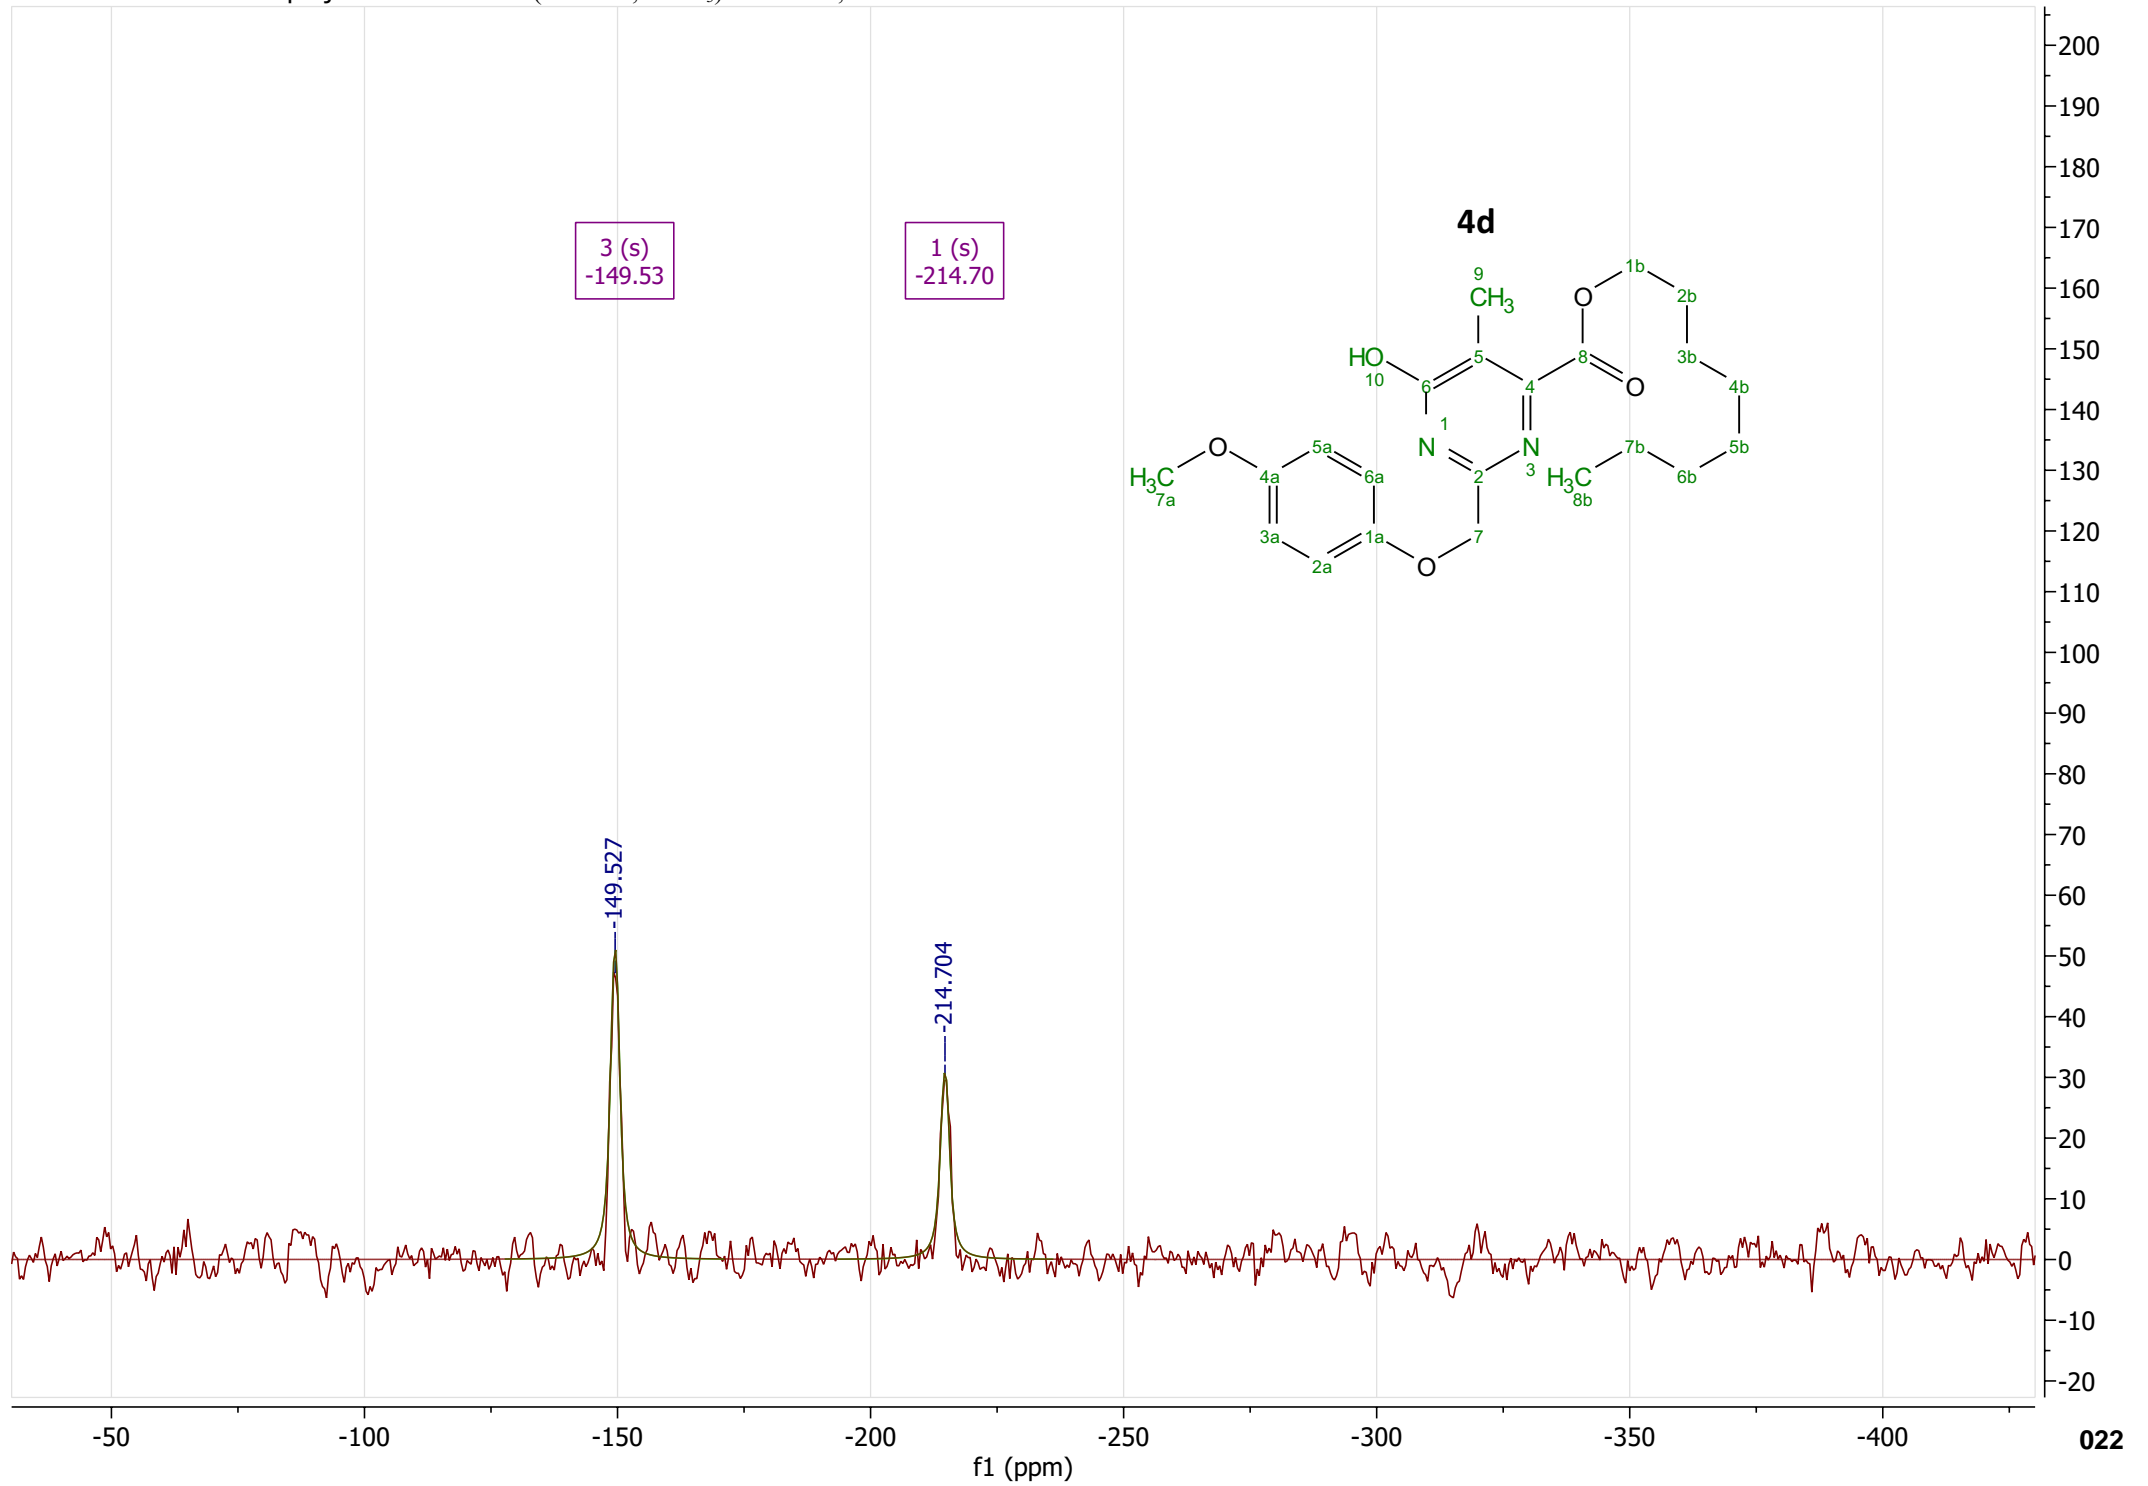

<sup>1</sup>H NMR (400 MHz, CDCl<sub>3</sub>) δ 10.86 (br s, 1H), 6.96 – 6.89 (m, 2H), 6.89 – 6.82 (m, 2H), 4.98 (s, 2H), 4.36 (t, *J* = 6.9 Hz, 2H), 3.77 (s, 3H), 2.25 (s, 3H), 1.83 – 1.71 (m, 2H), 1.45 – 1.37 (m, 2H), 1.37 – 1.23 (m, 10H), 0.87 (app t, *J* = 6.9 Hz, 3H).

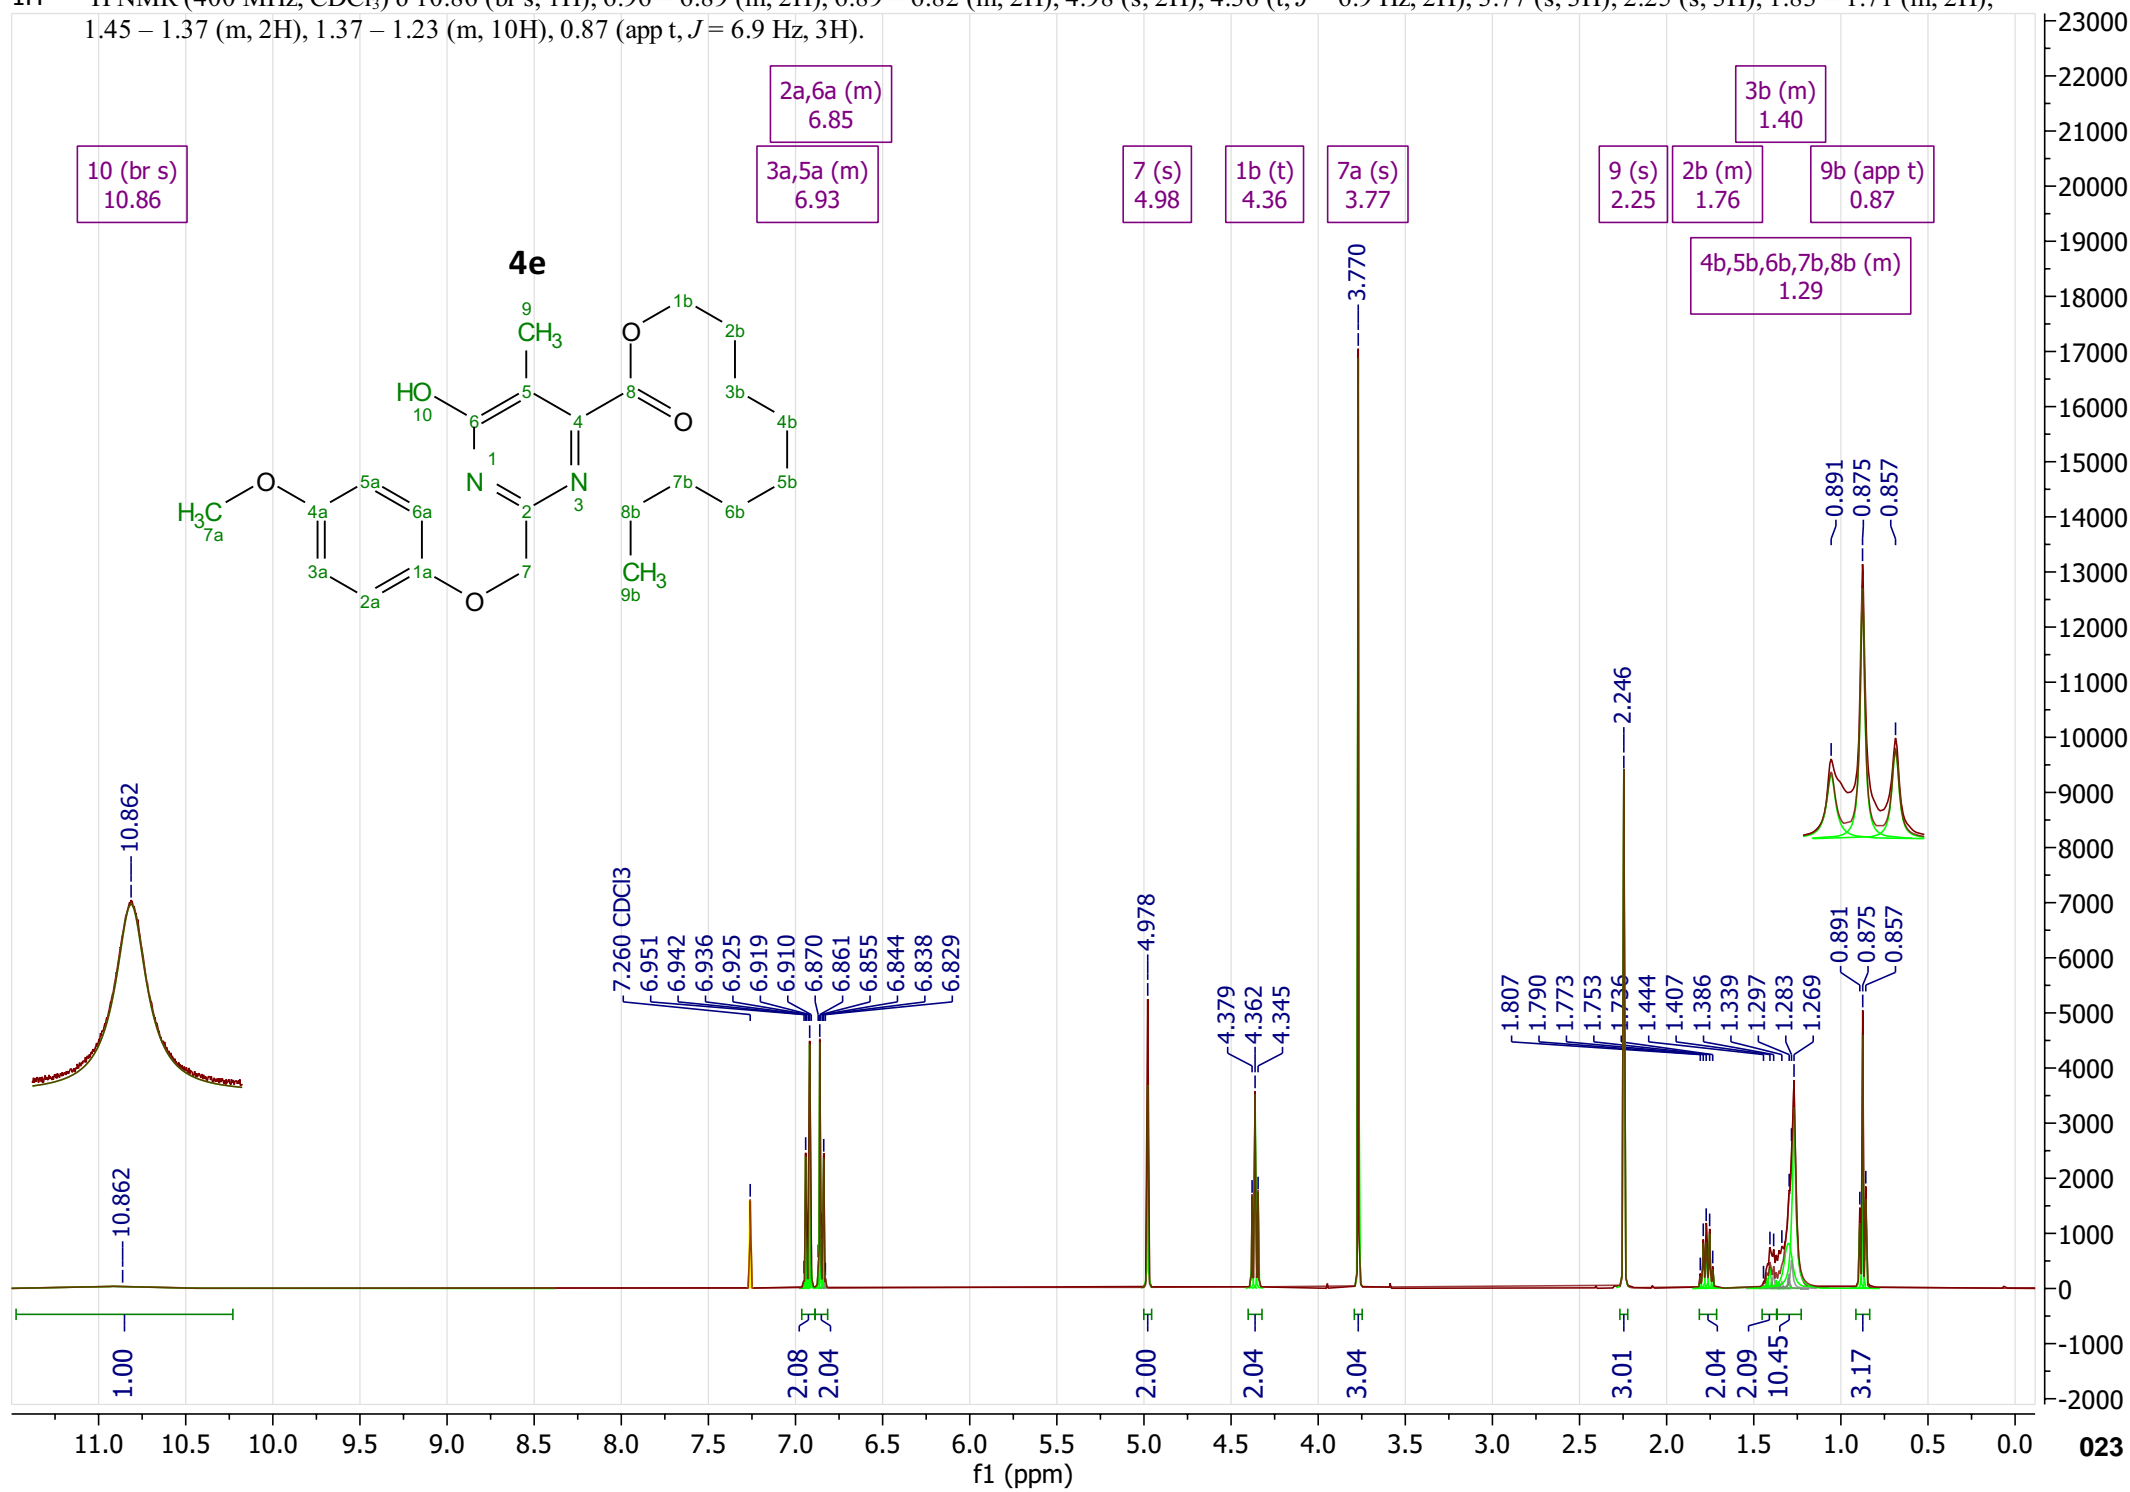

$^{13}\text{C}$  NMR (101 MHz,  $\text{CDCl}_3$ )  $\delta$  165.6, 163.5, 155.2, 154.7, 151.1, 150.8, 125.1, 115.9 (sym, 2C), 115.0 (sym, 2C), 67.3, 66.5, 55.8, 32.0, 29.6, 29.3 (2C), 28.7, 26.0, 22.8, 14.2, 11.9

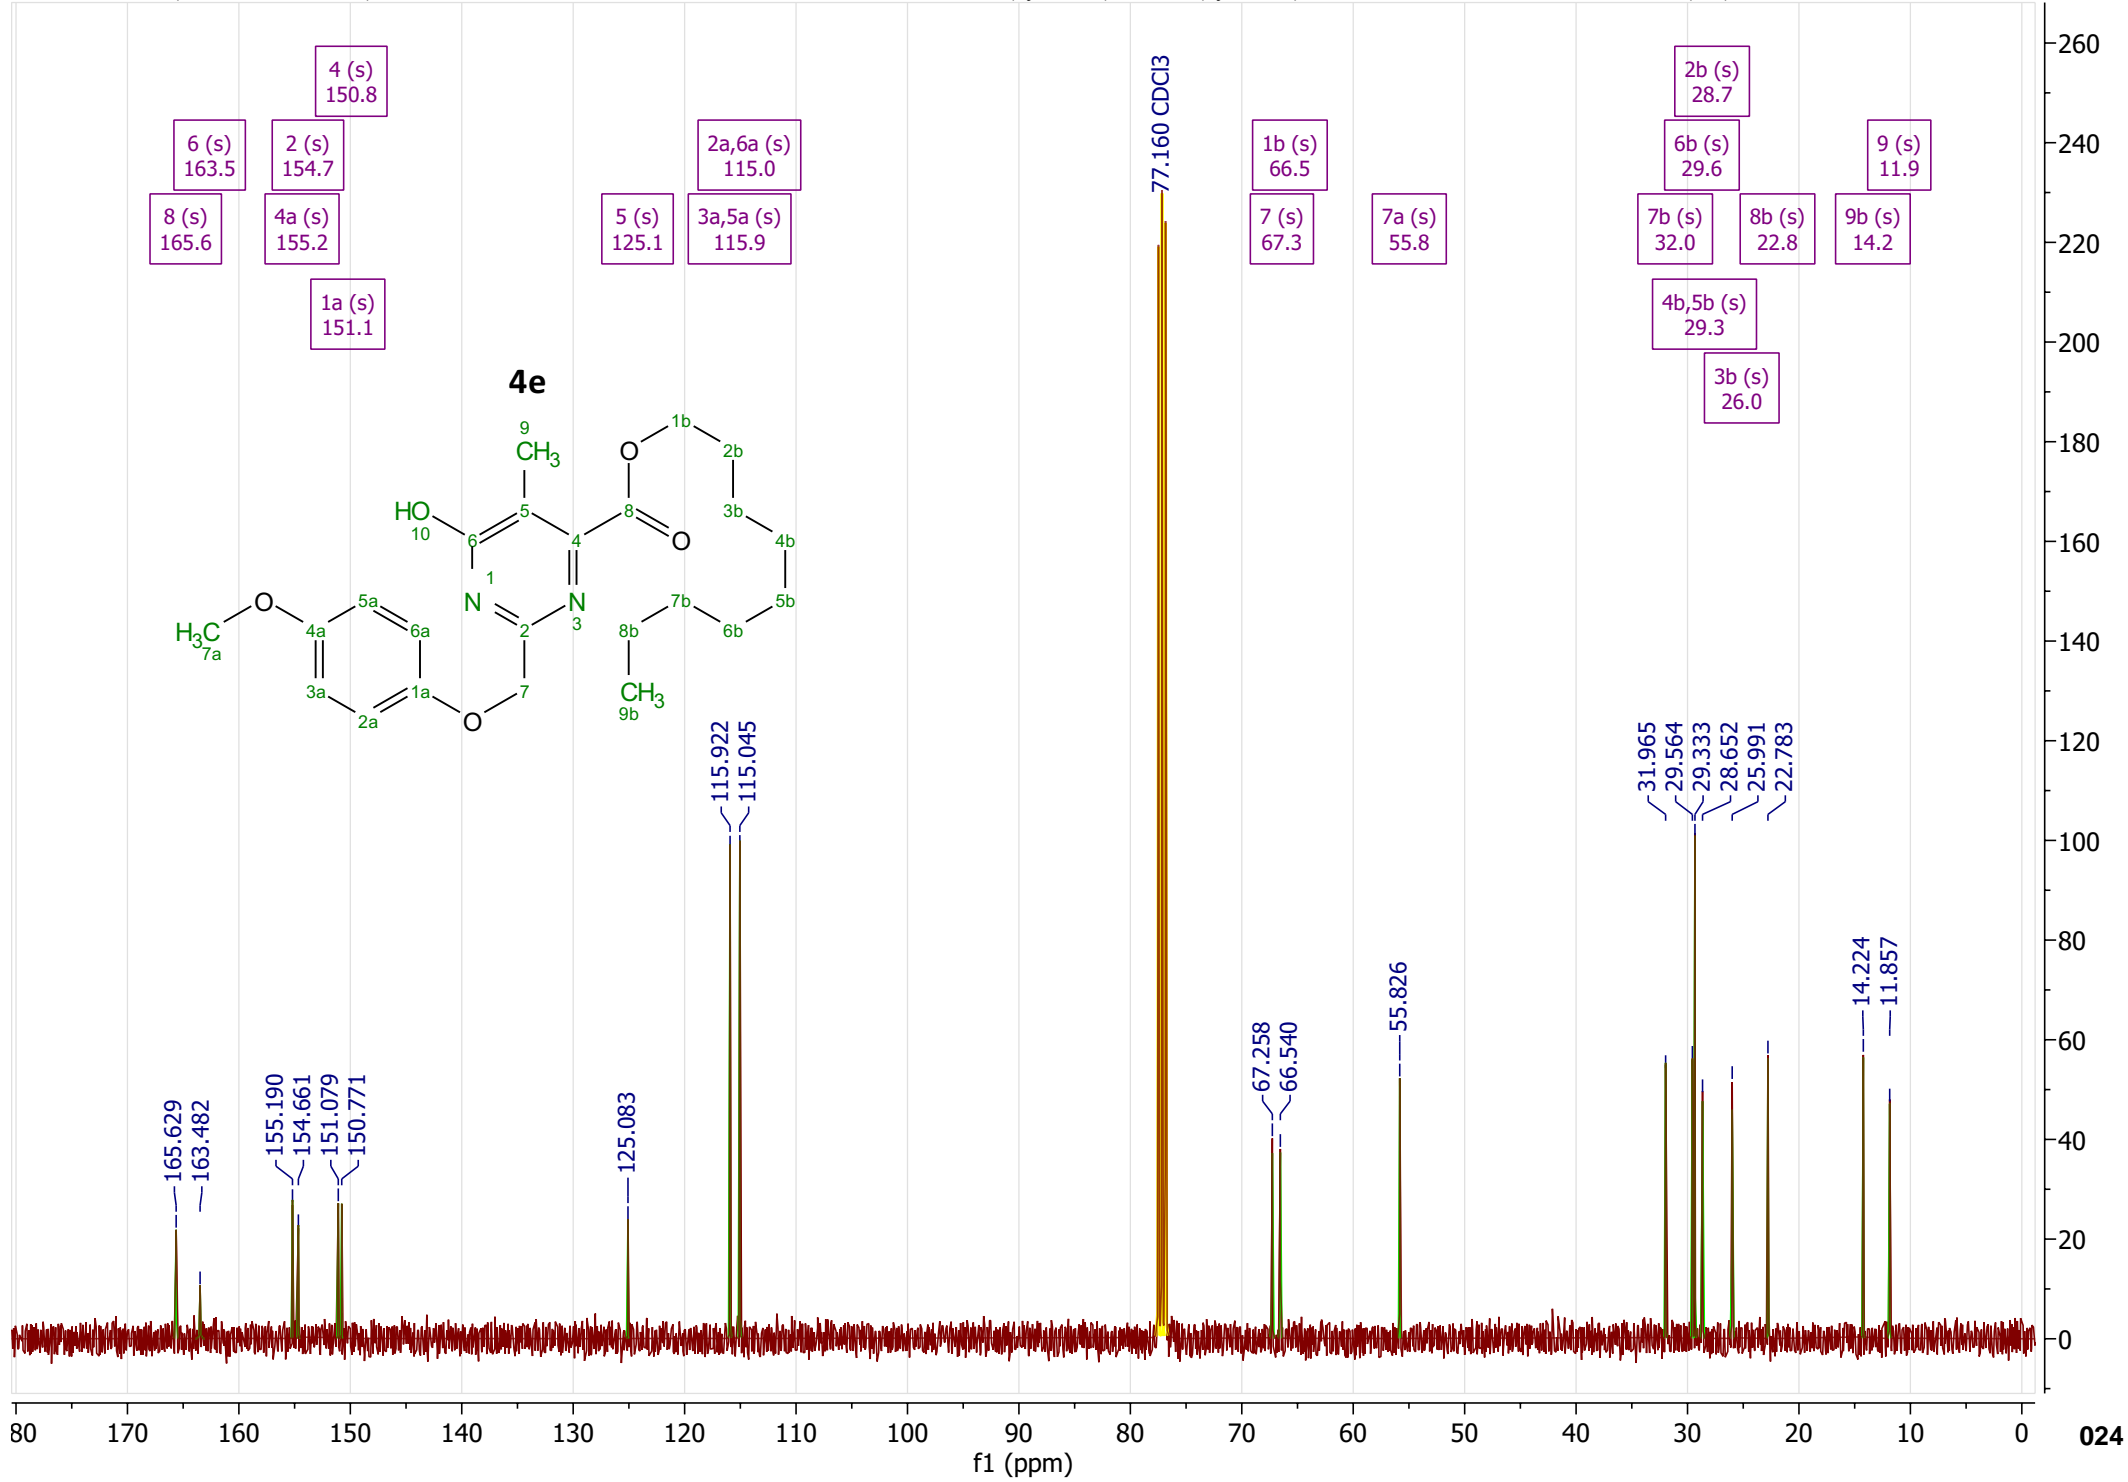



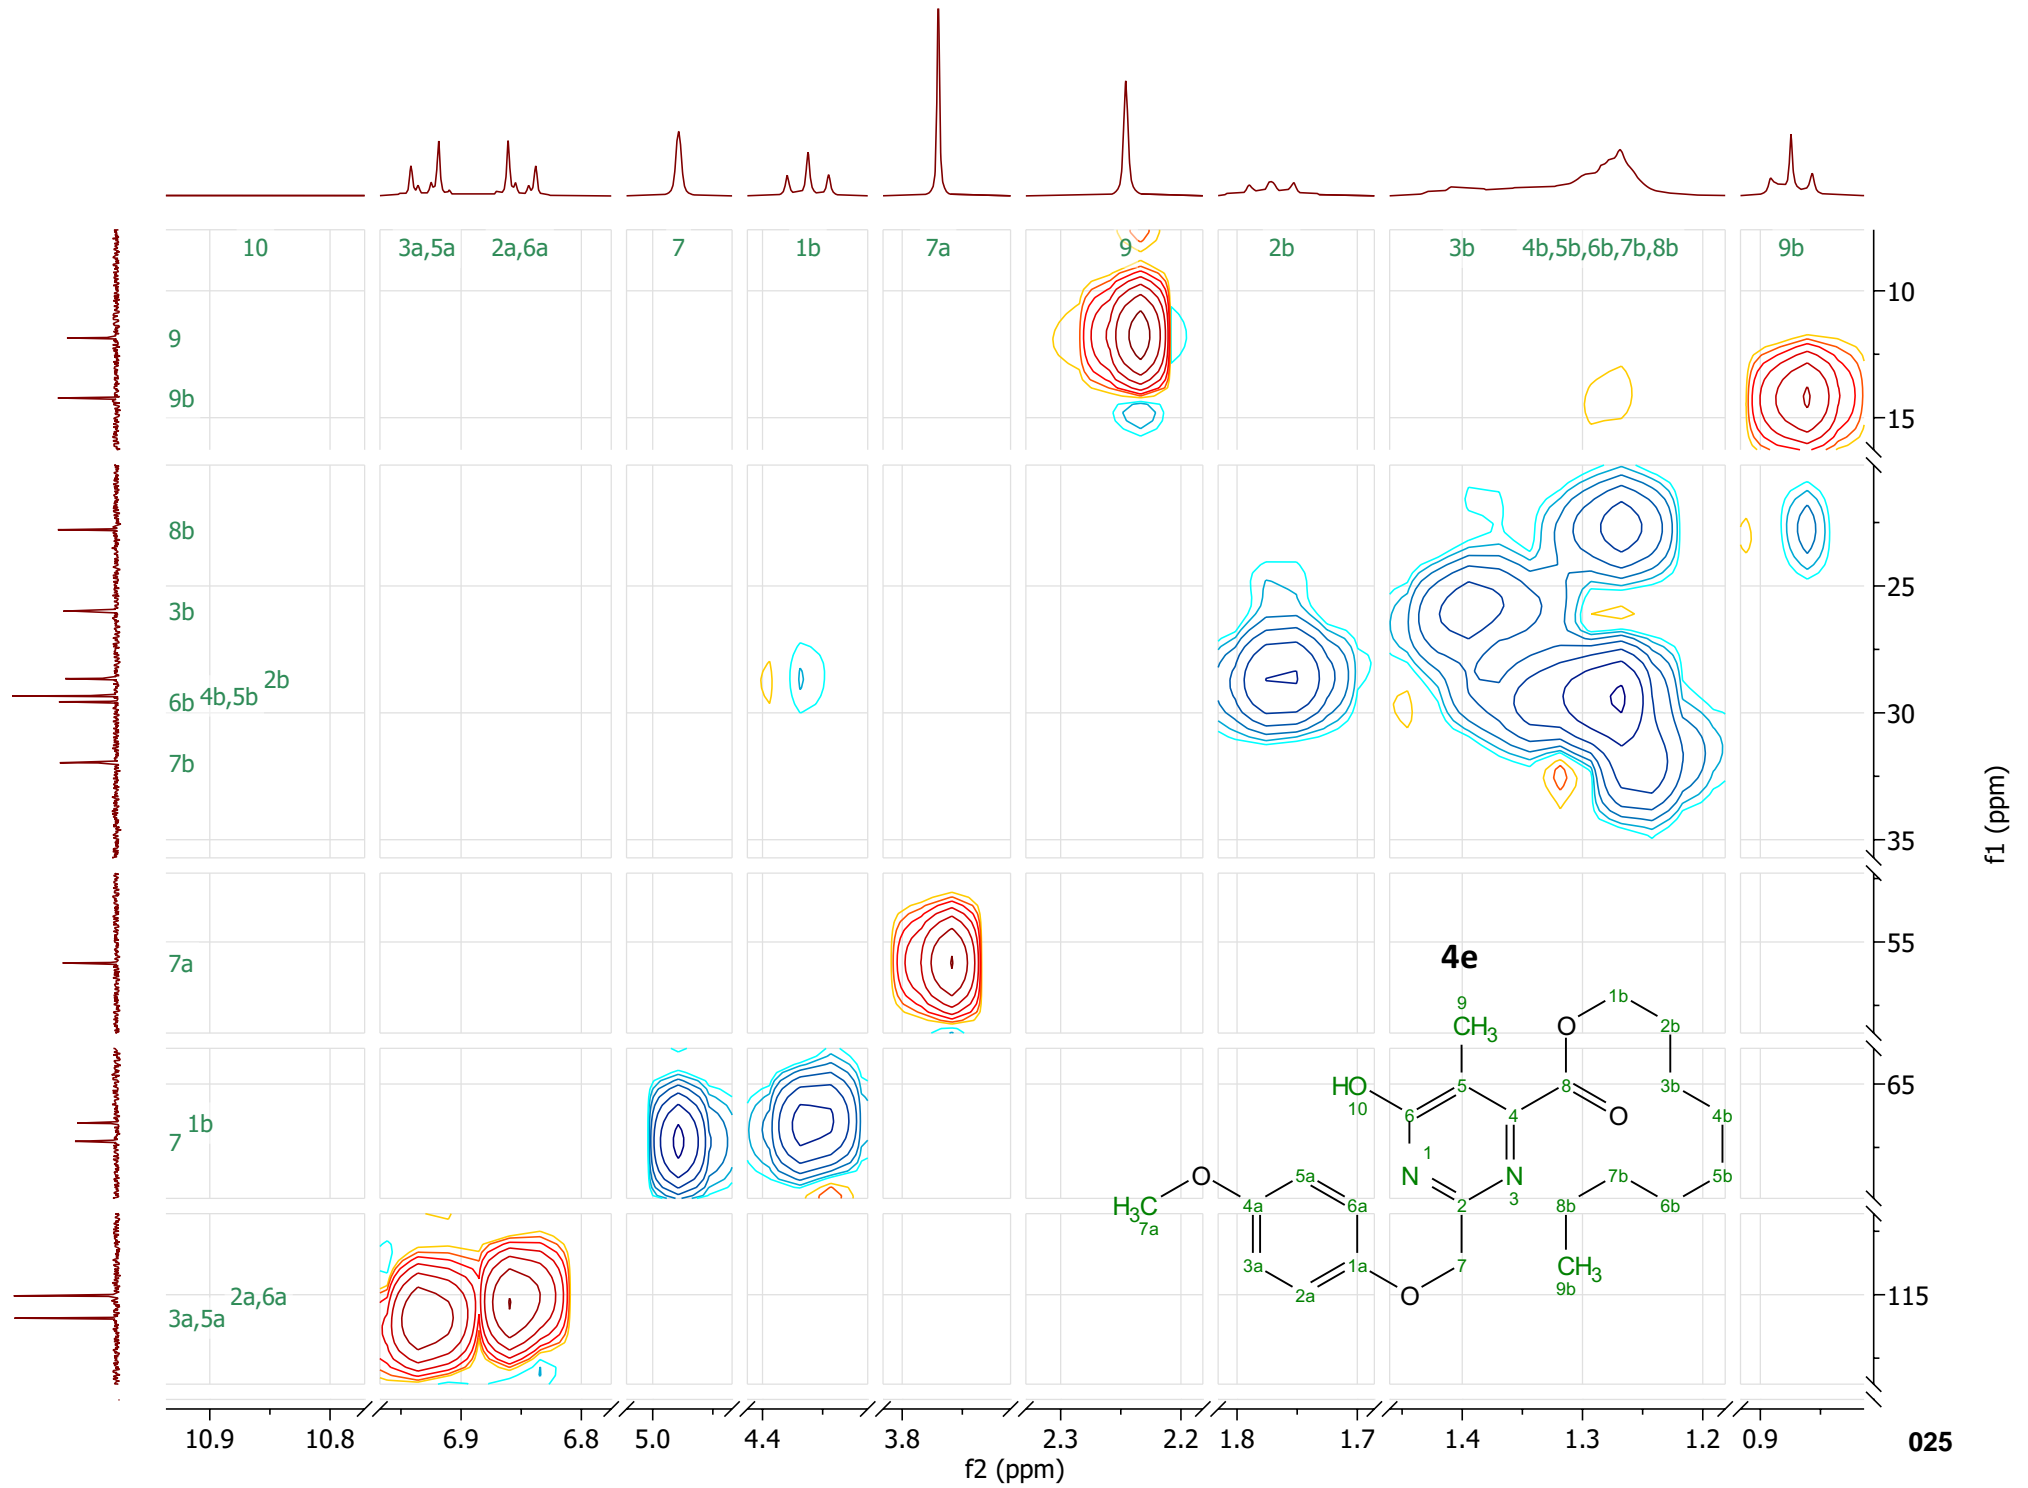

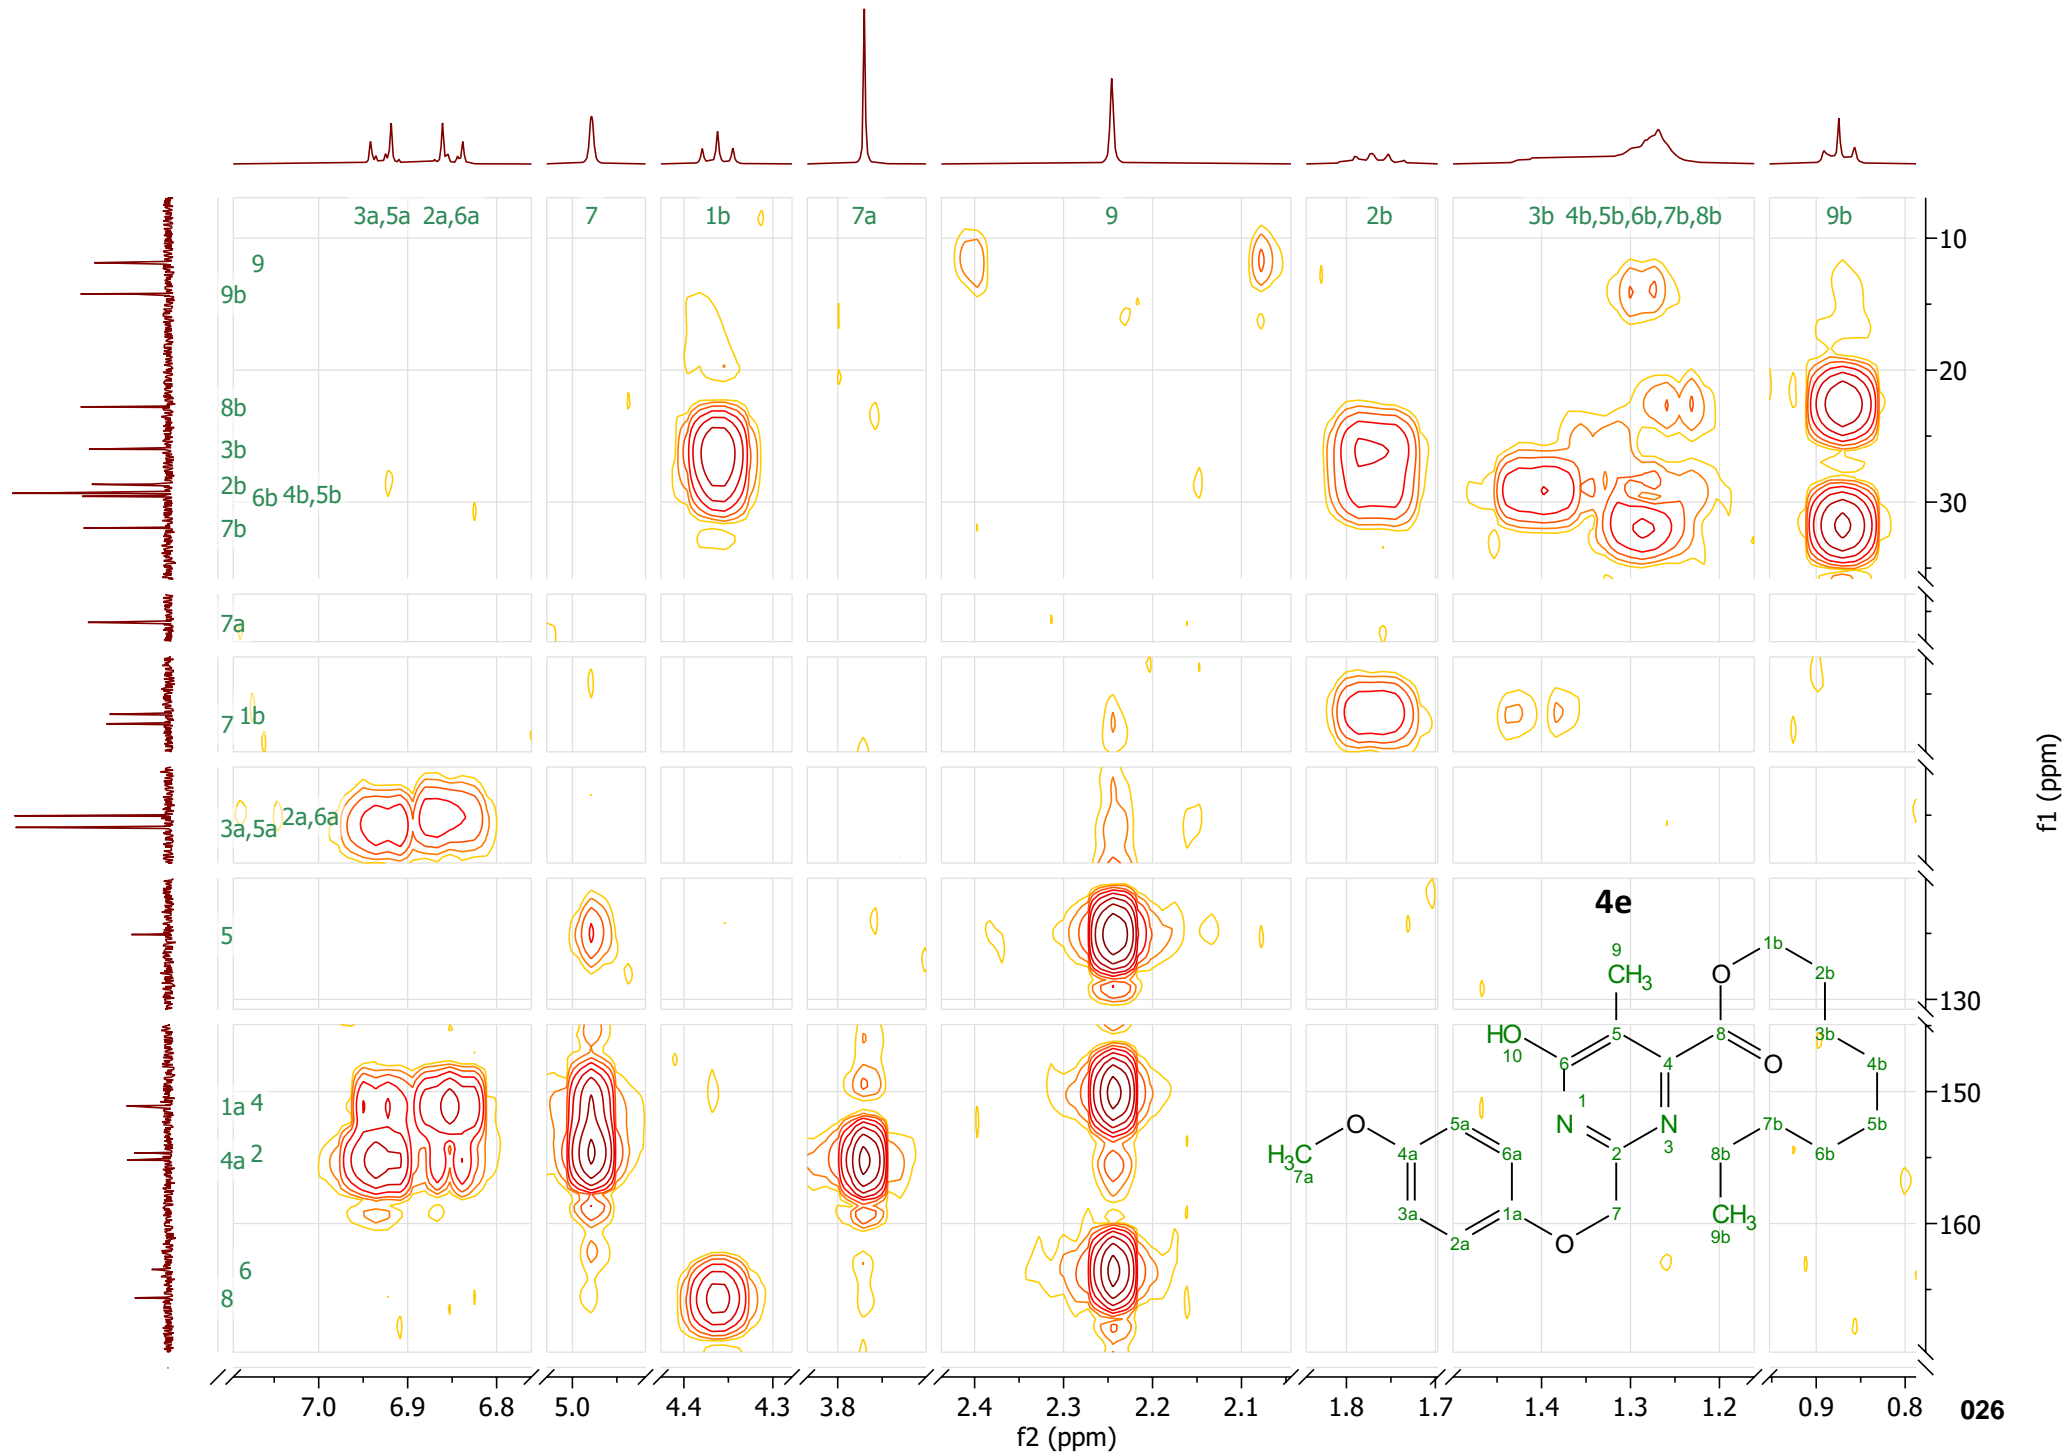

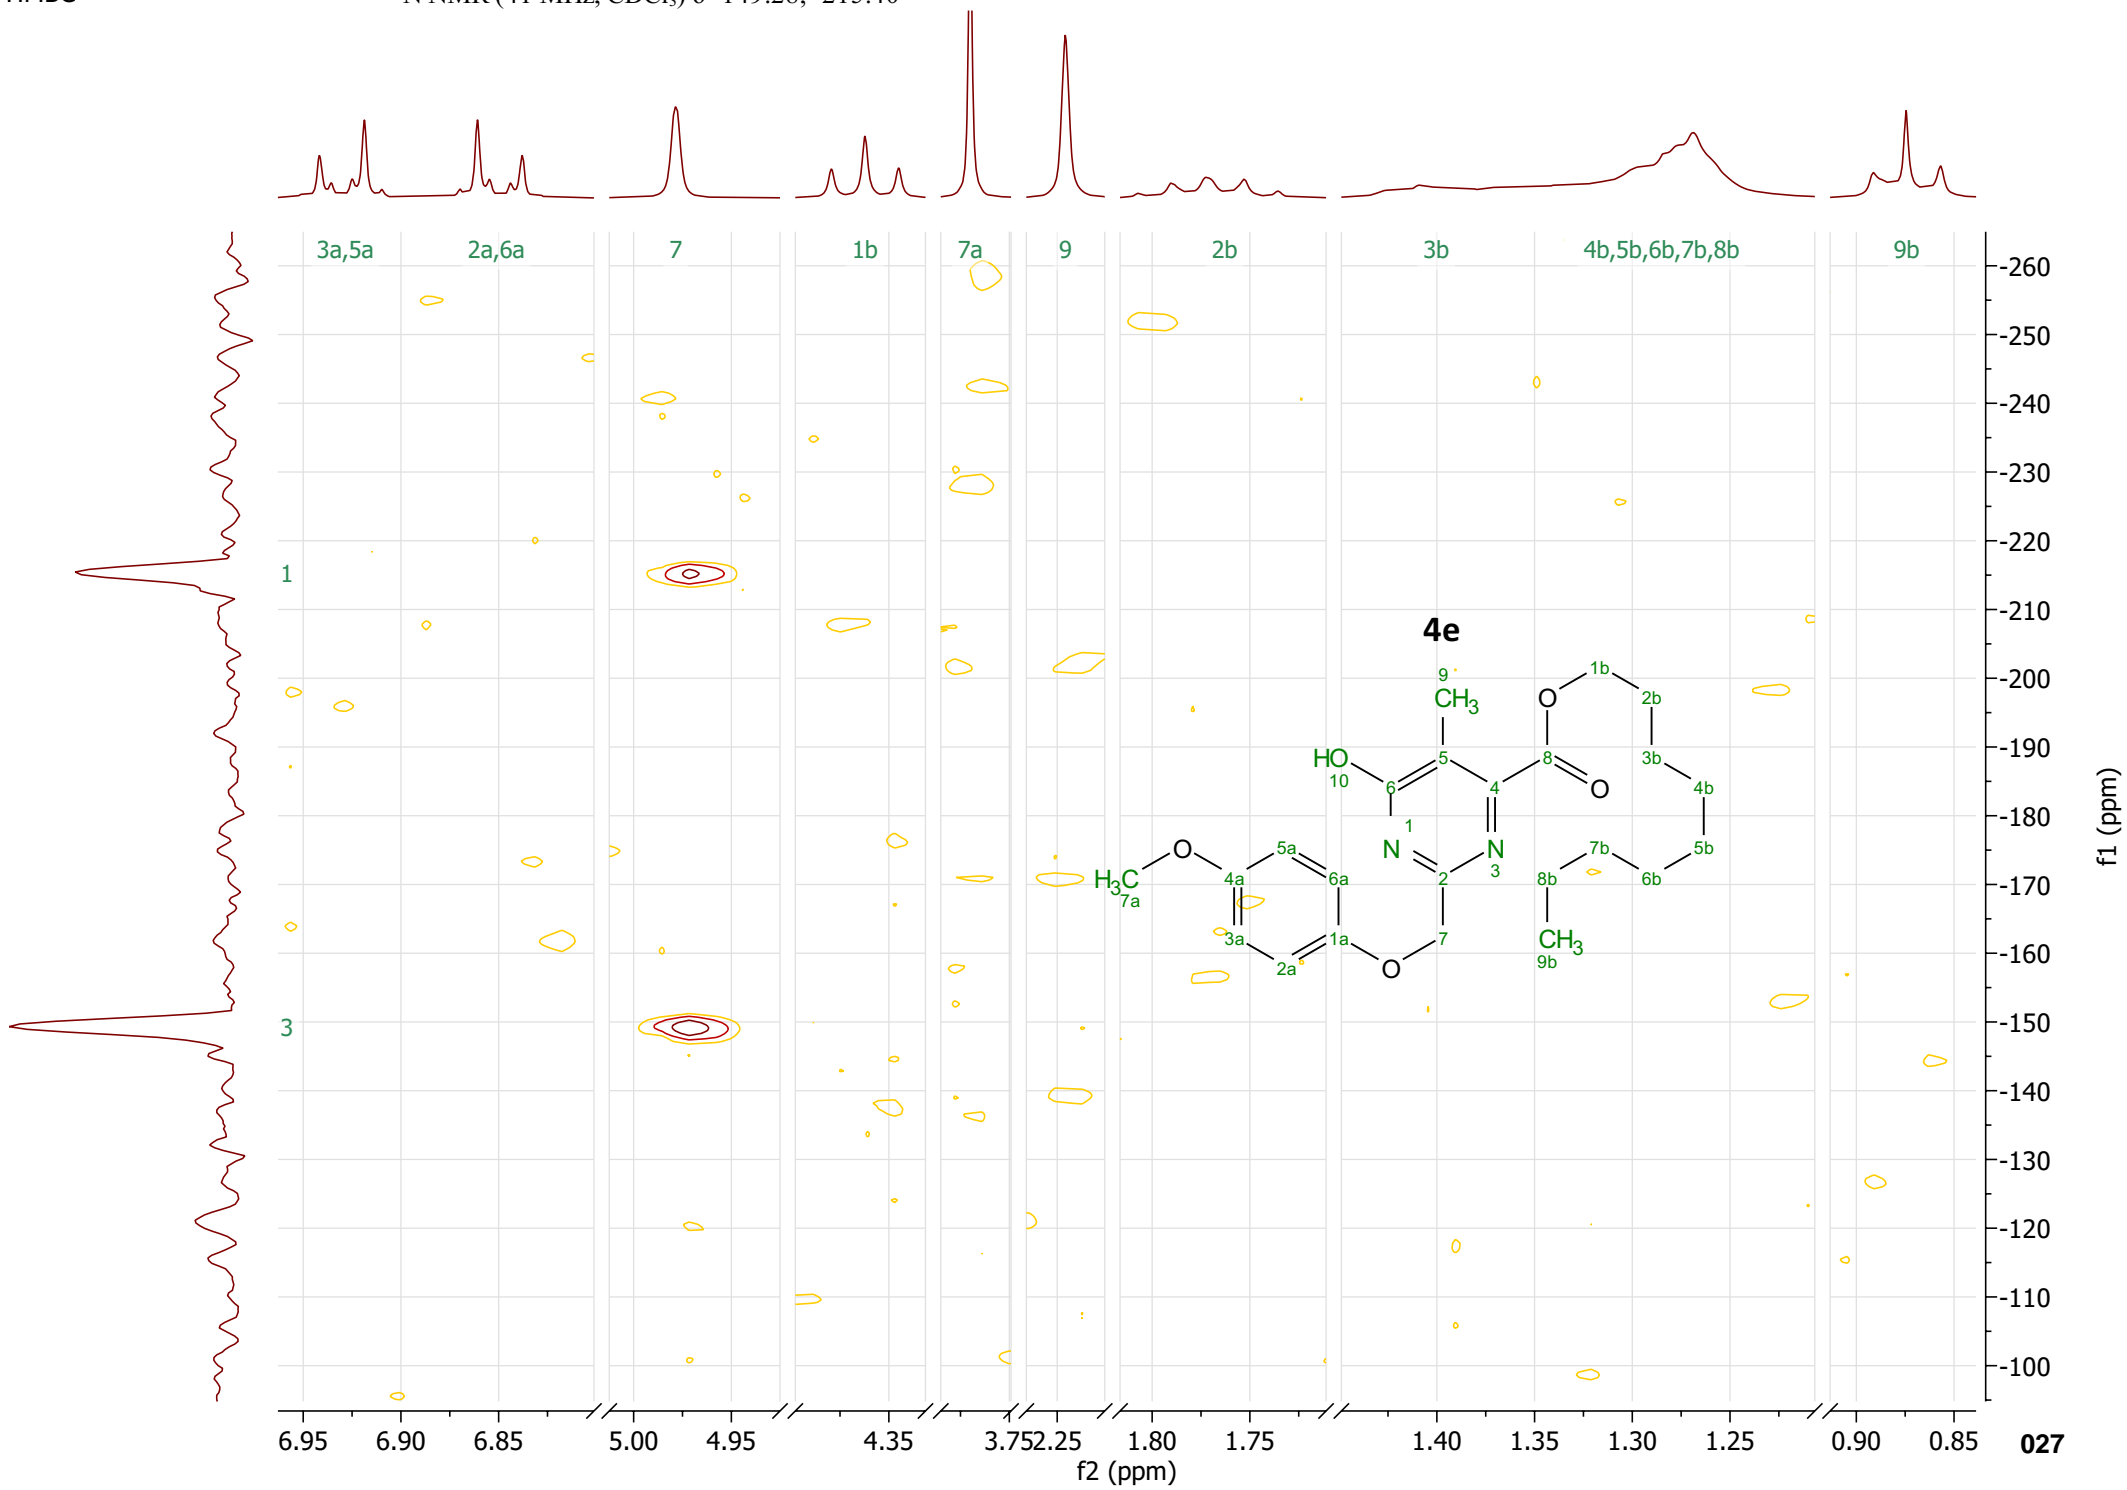

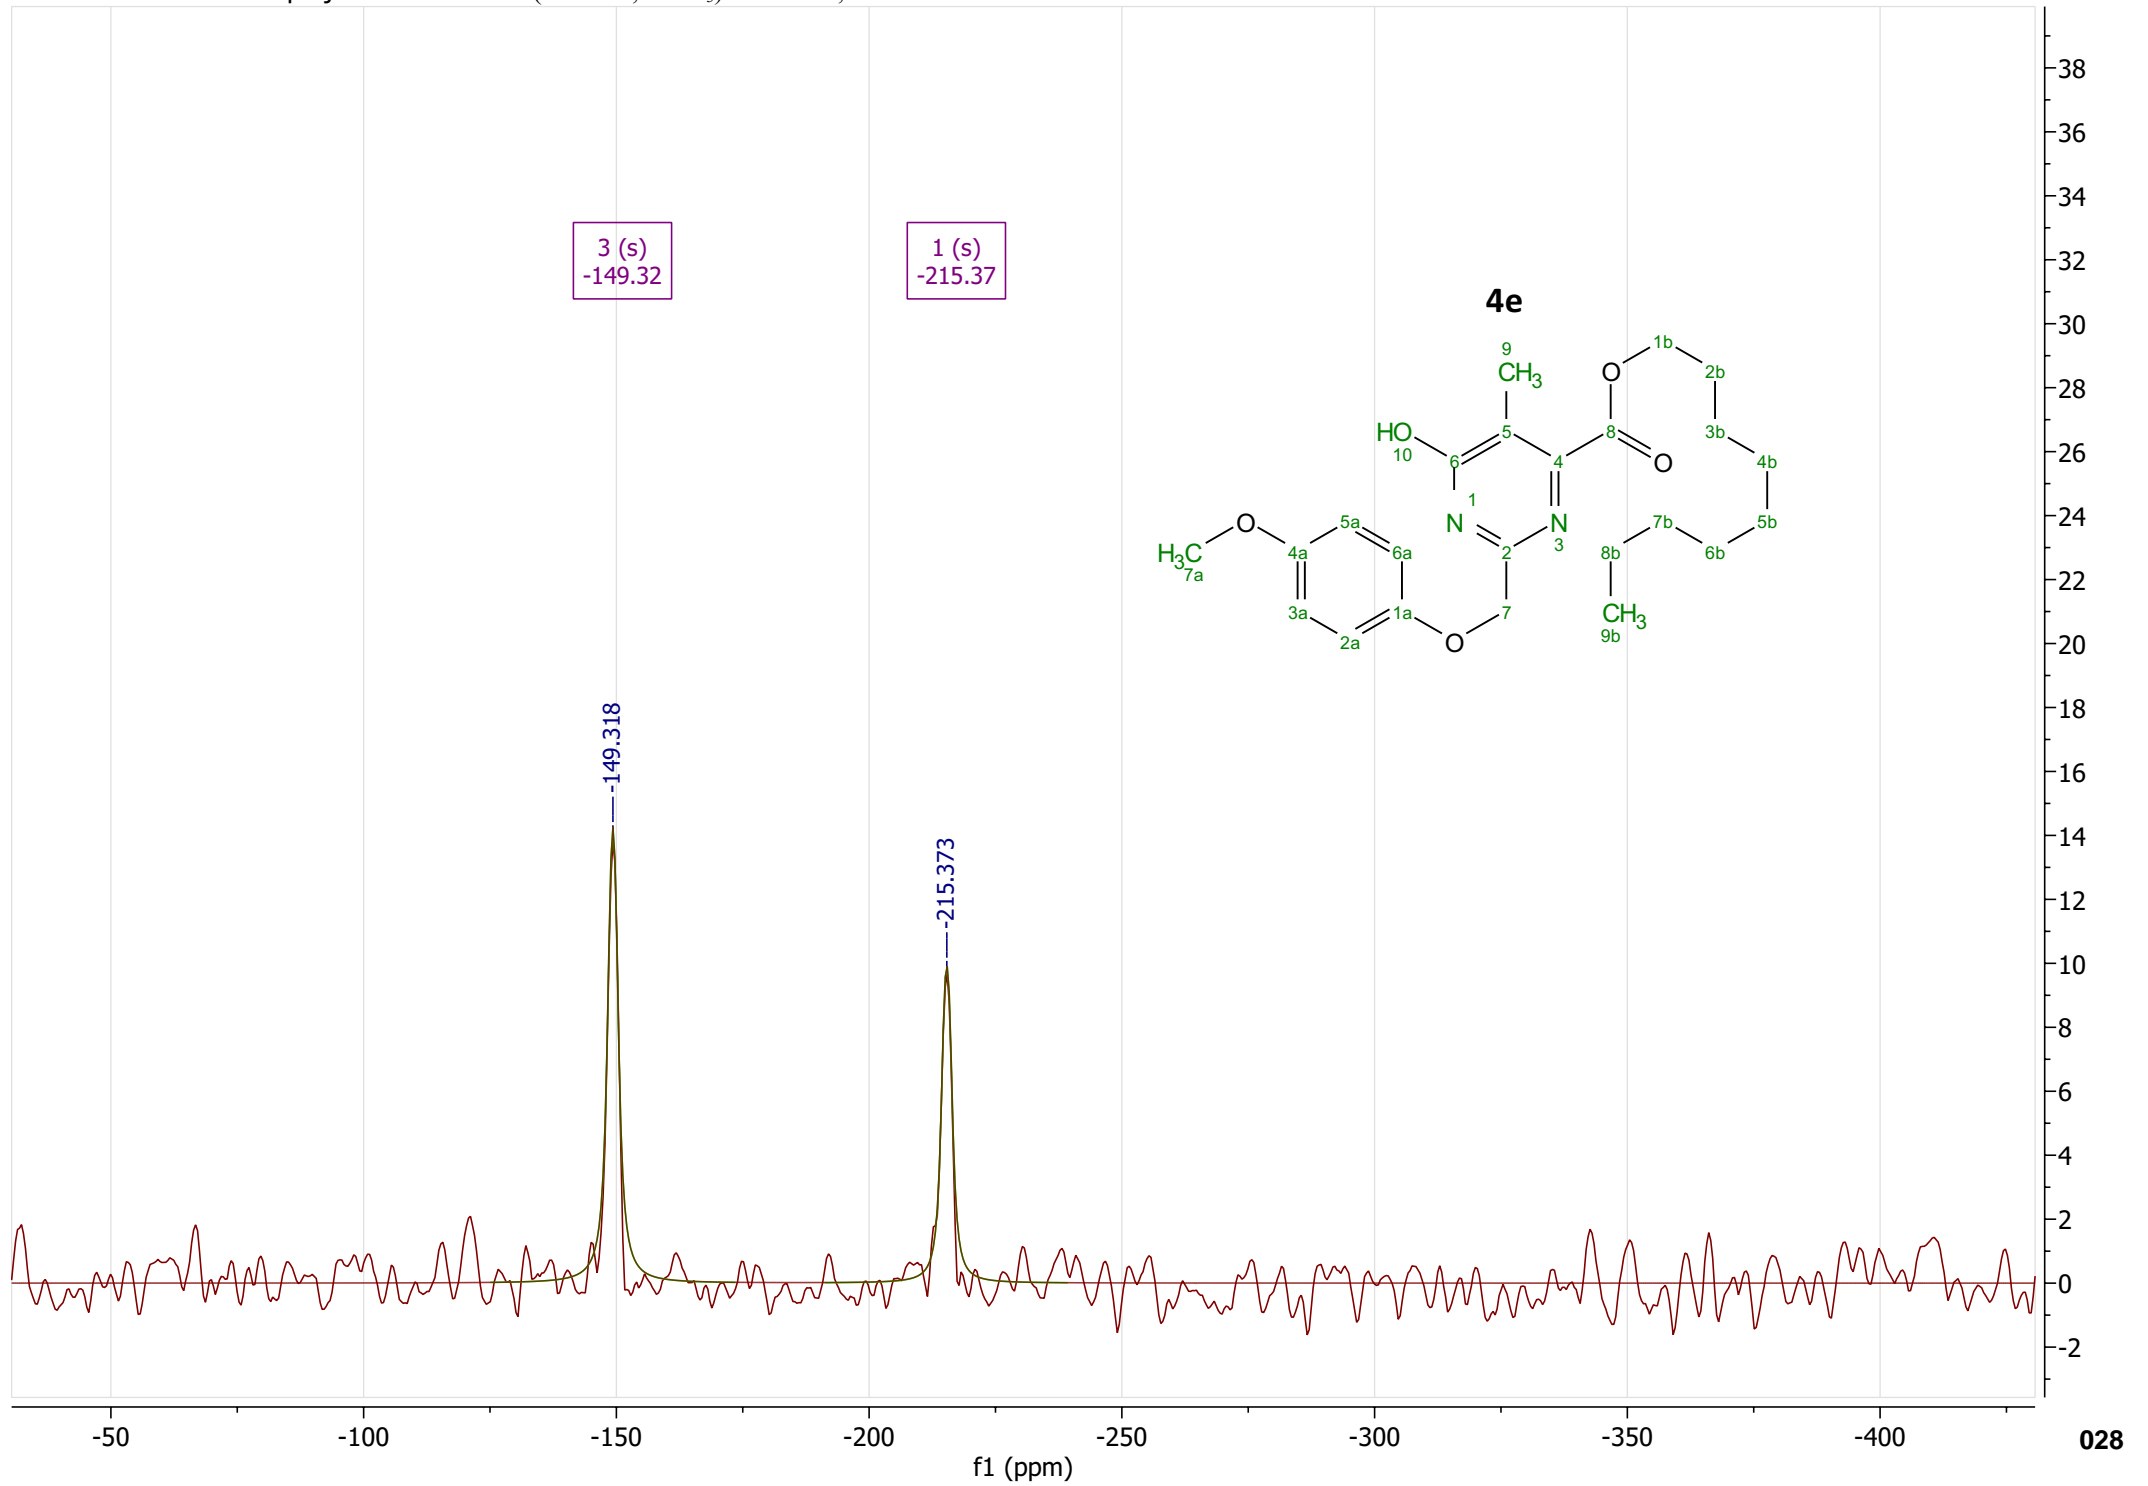

$^1\text{H}$  NMR (400 MHz,  $\text{CDCl}_3$ )  $\delta$  10.44 (br s, 1H), 7.73 (br s, 1H), 7.67 – 7.61 (m, 2H), 7.63 – 7.59 (m, 1H), 7.55 – 7.50 (m, 1H), 6.96 – 6.89 (m, 2H), 6.89 – 6.81 (m, 2H), 5.45 (s, 2H), 4.98 (s, 2H), 3.77 (s, 3H), 2.24 (s, 3H).

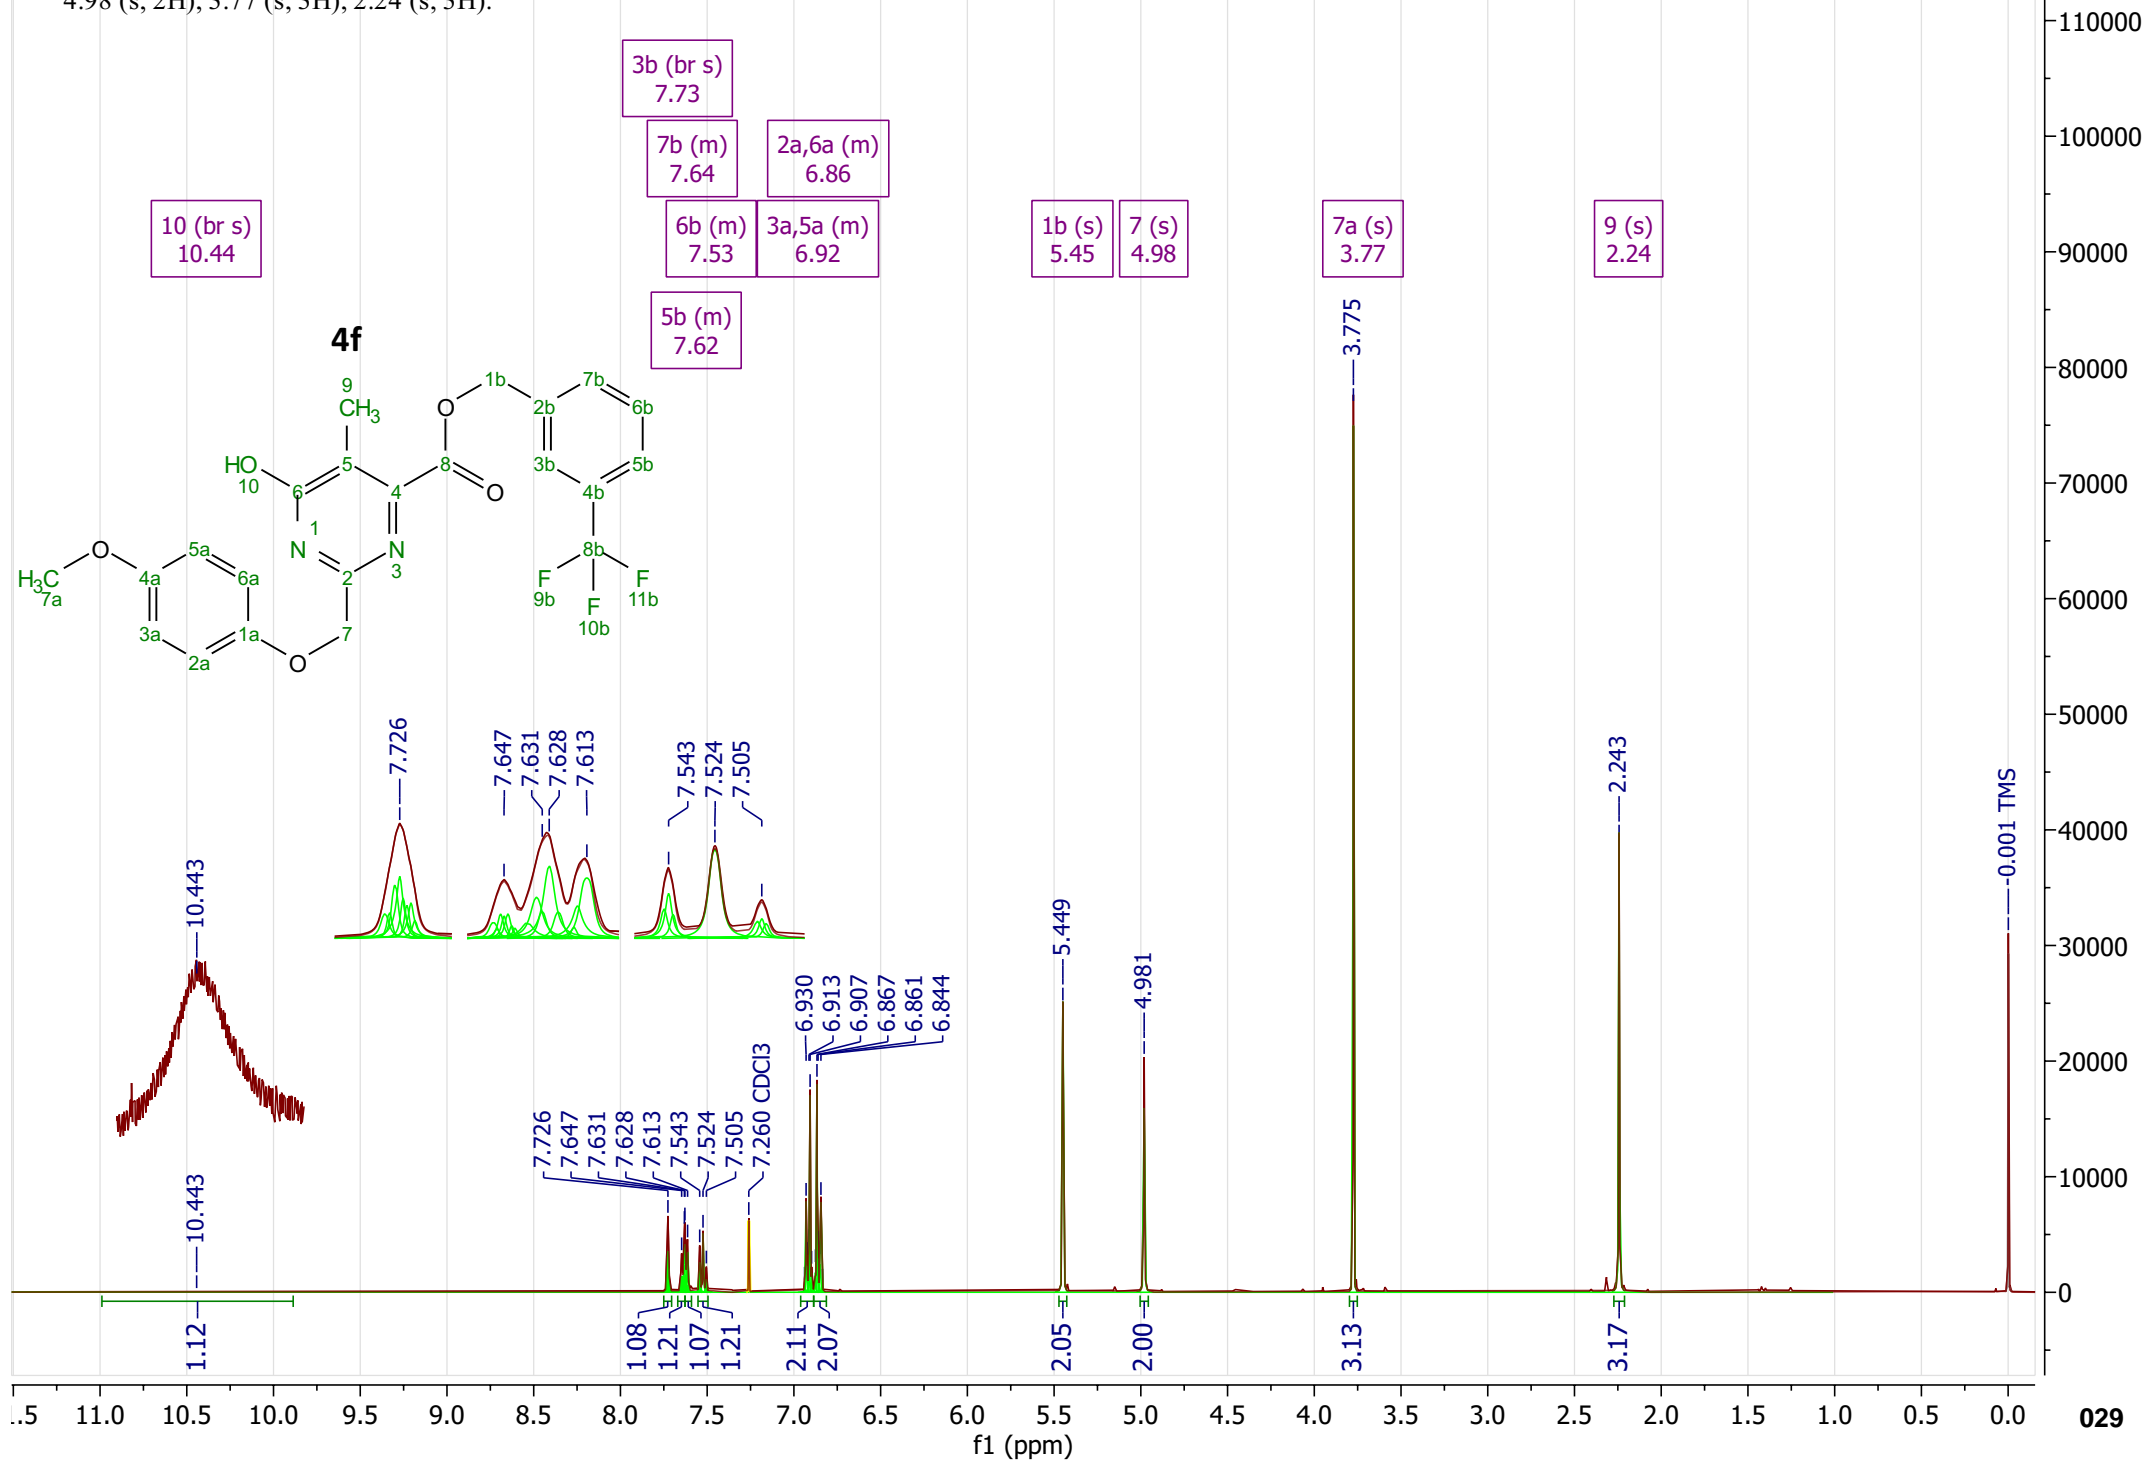

<sup>13</sup>C <sup>1</sup>H NMR (400 MHz, CDCl<sub>3</sub>) δ 10.4 (br s, 1H), 7.7 (br s, 1H), 7.7 – 7.6 (m, 2H), 7.6 – 7.6 (m, 1H), 7.6 – 7.5 (m, 1H), 7.0 – 6.9 (m, 2H), 6.9 – 6.8 (m, 2H), 5.4 (s, 2H), 5.0 (s, 2H), 3.8 (s, 3H), 2.2 (s, 3H).

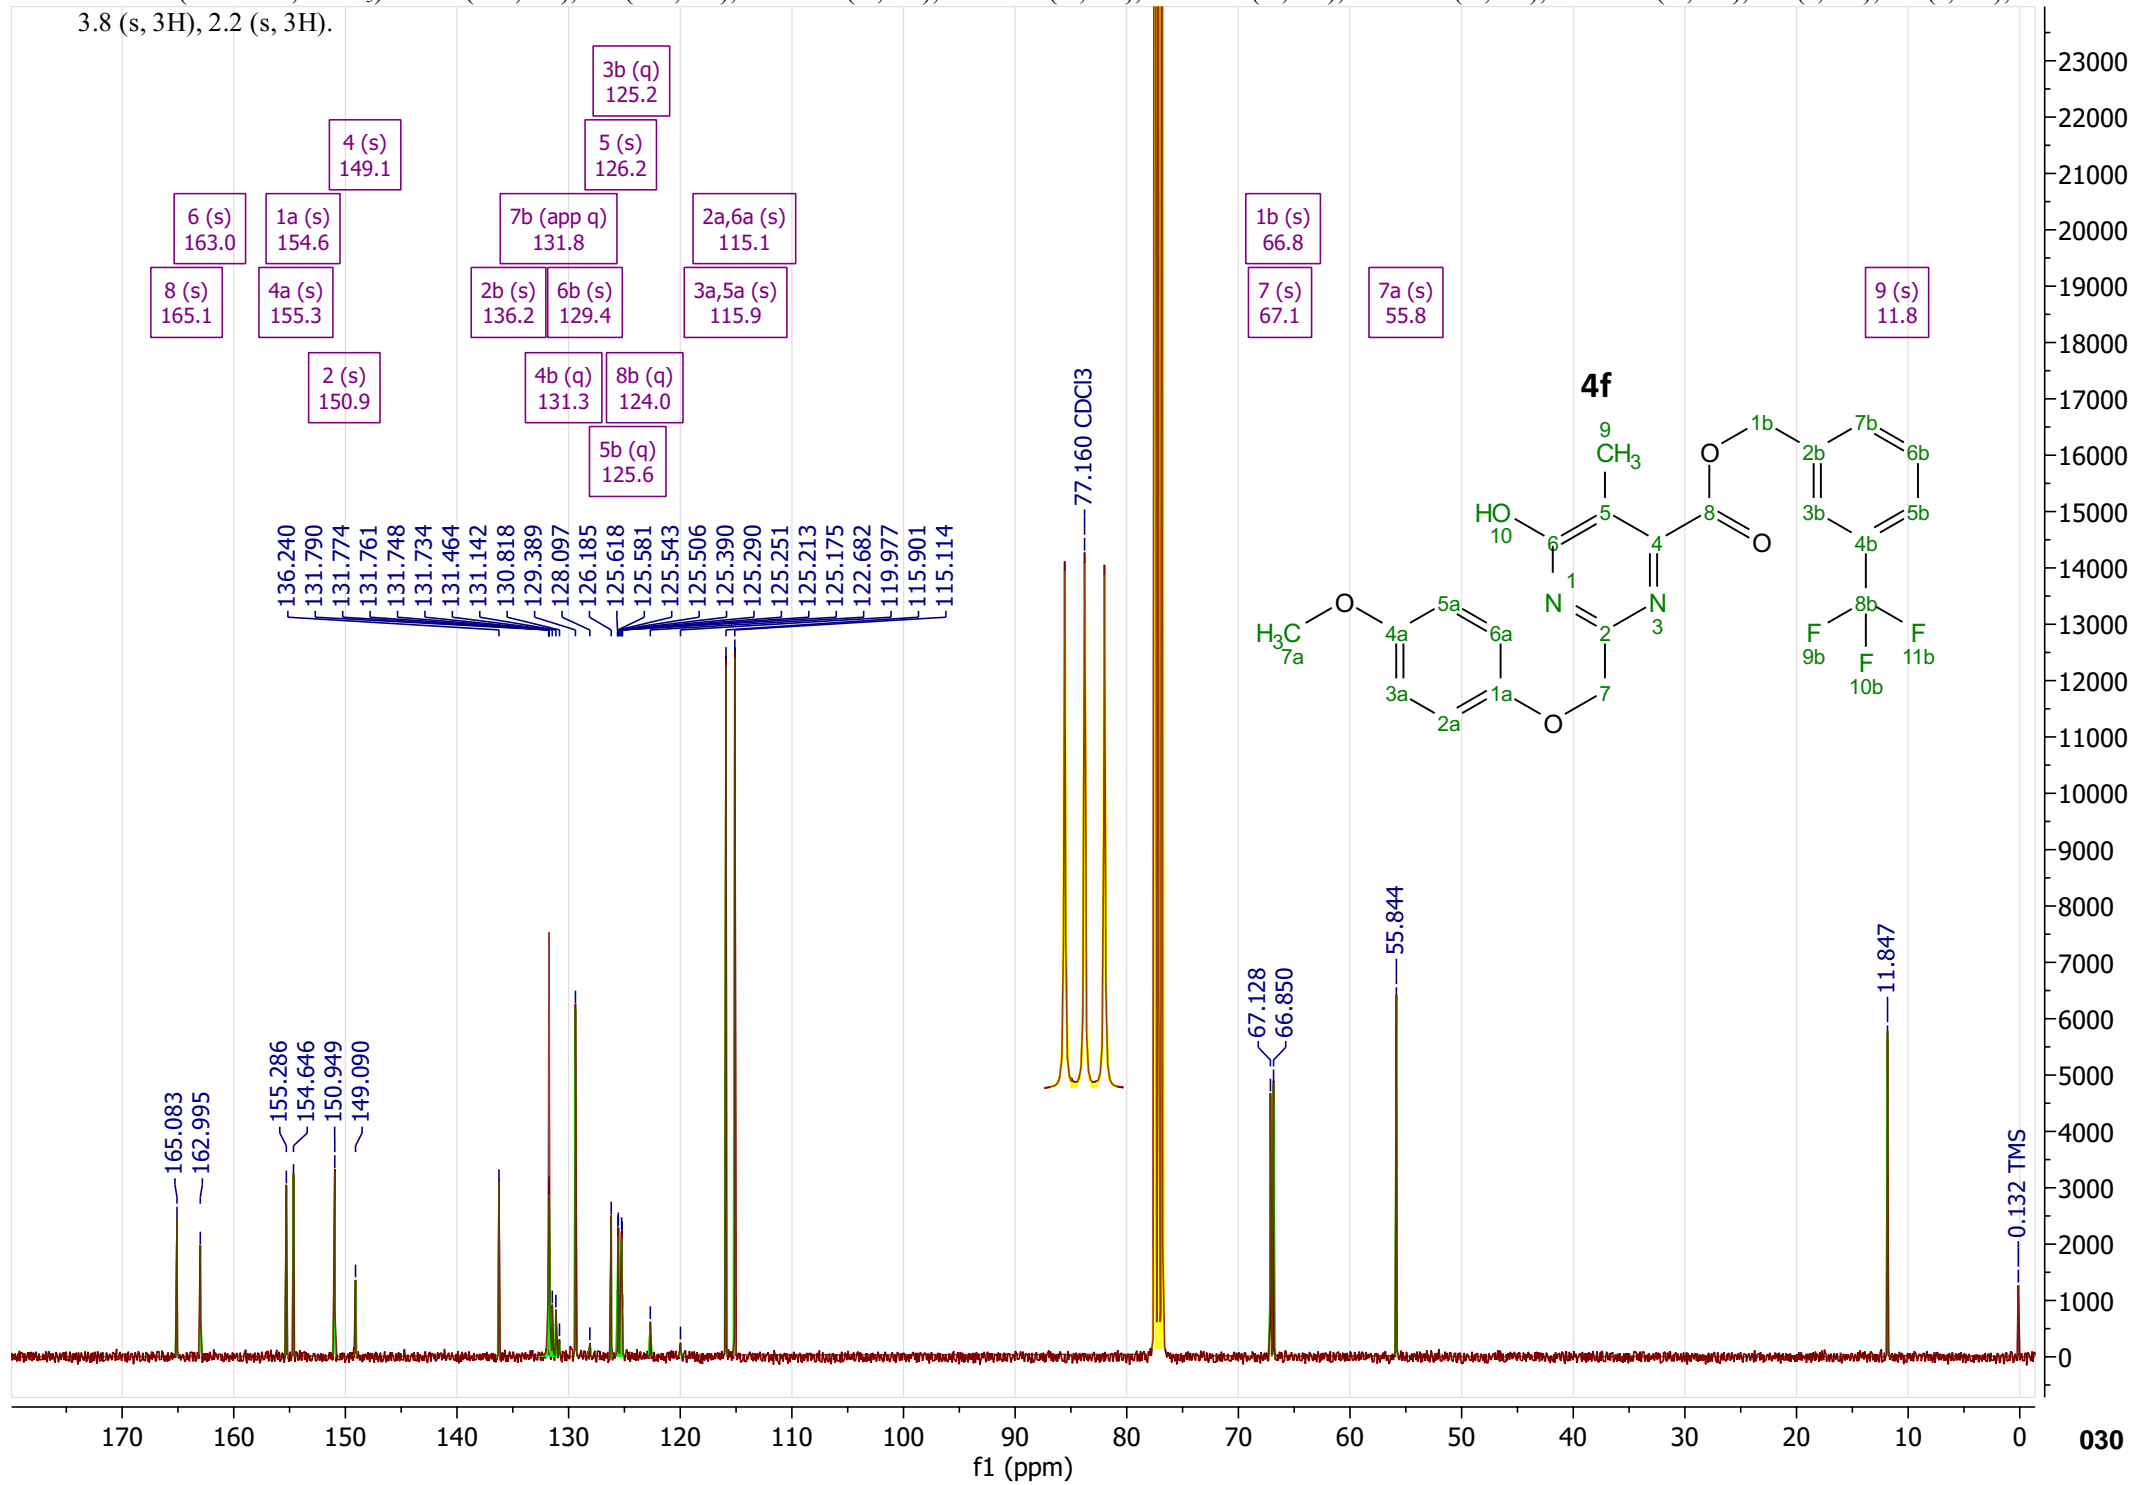

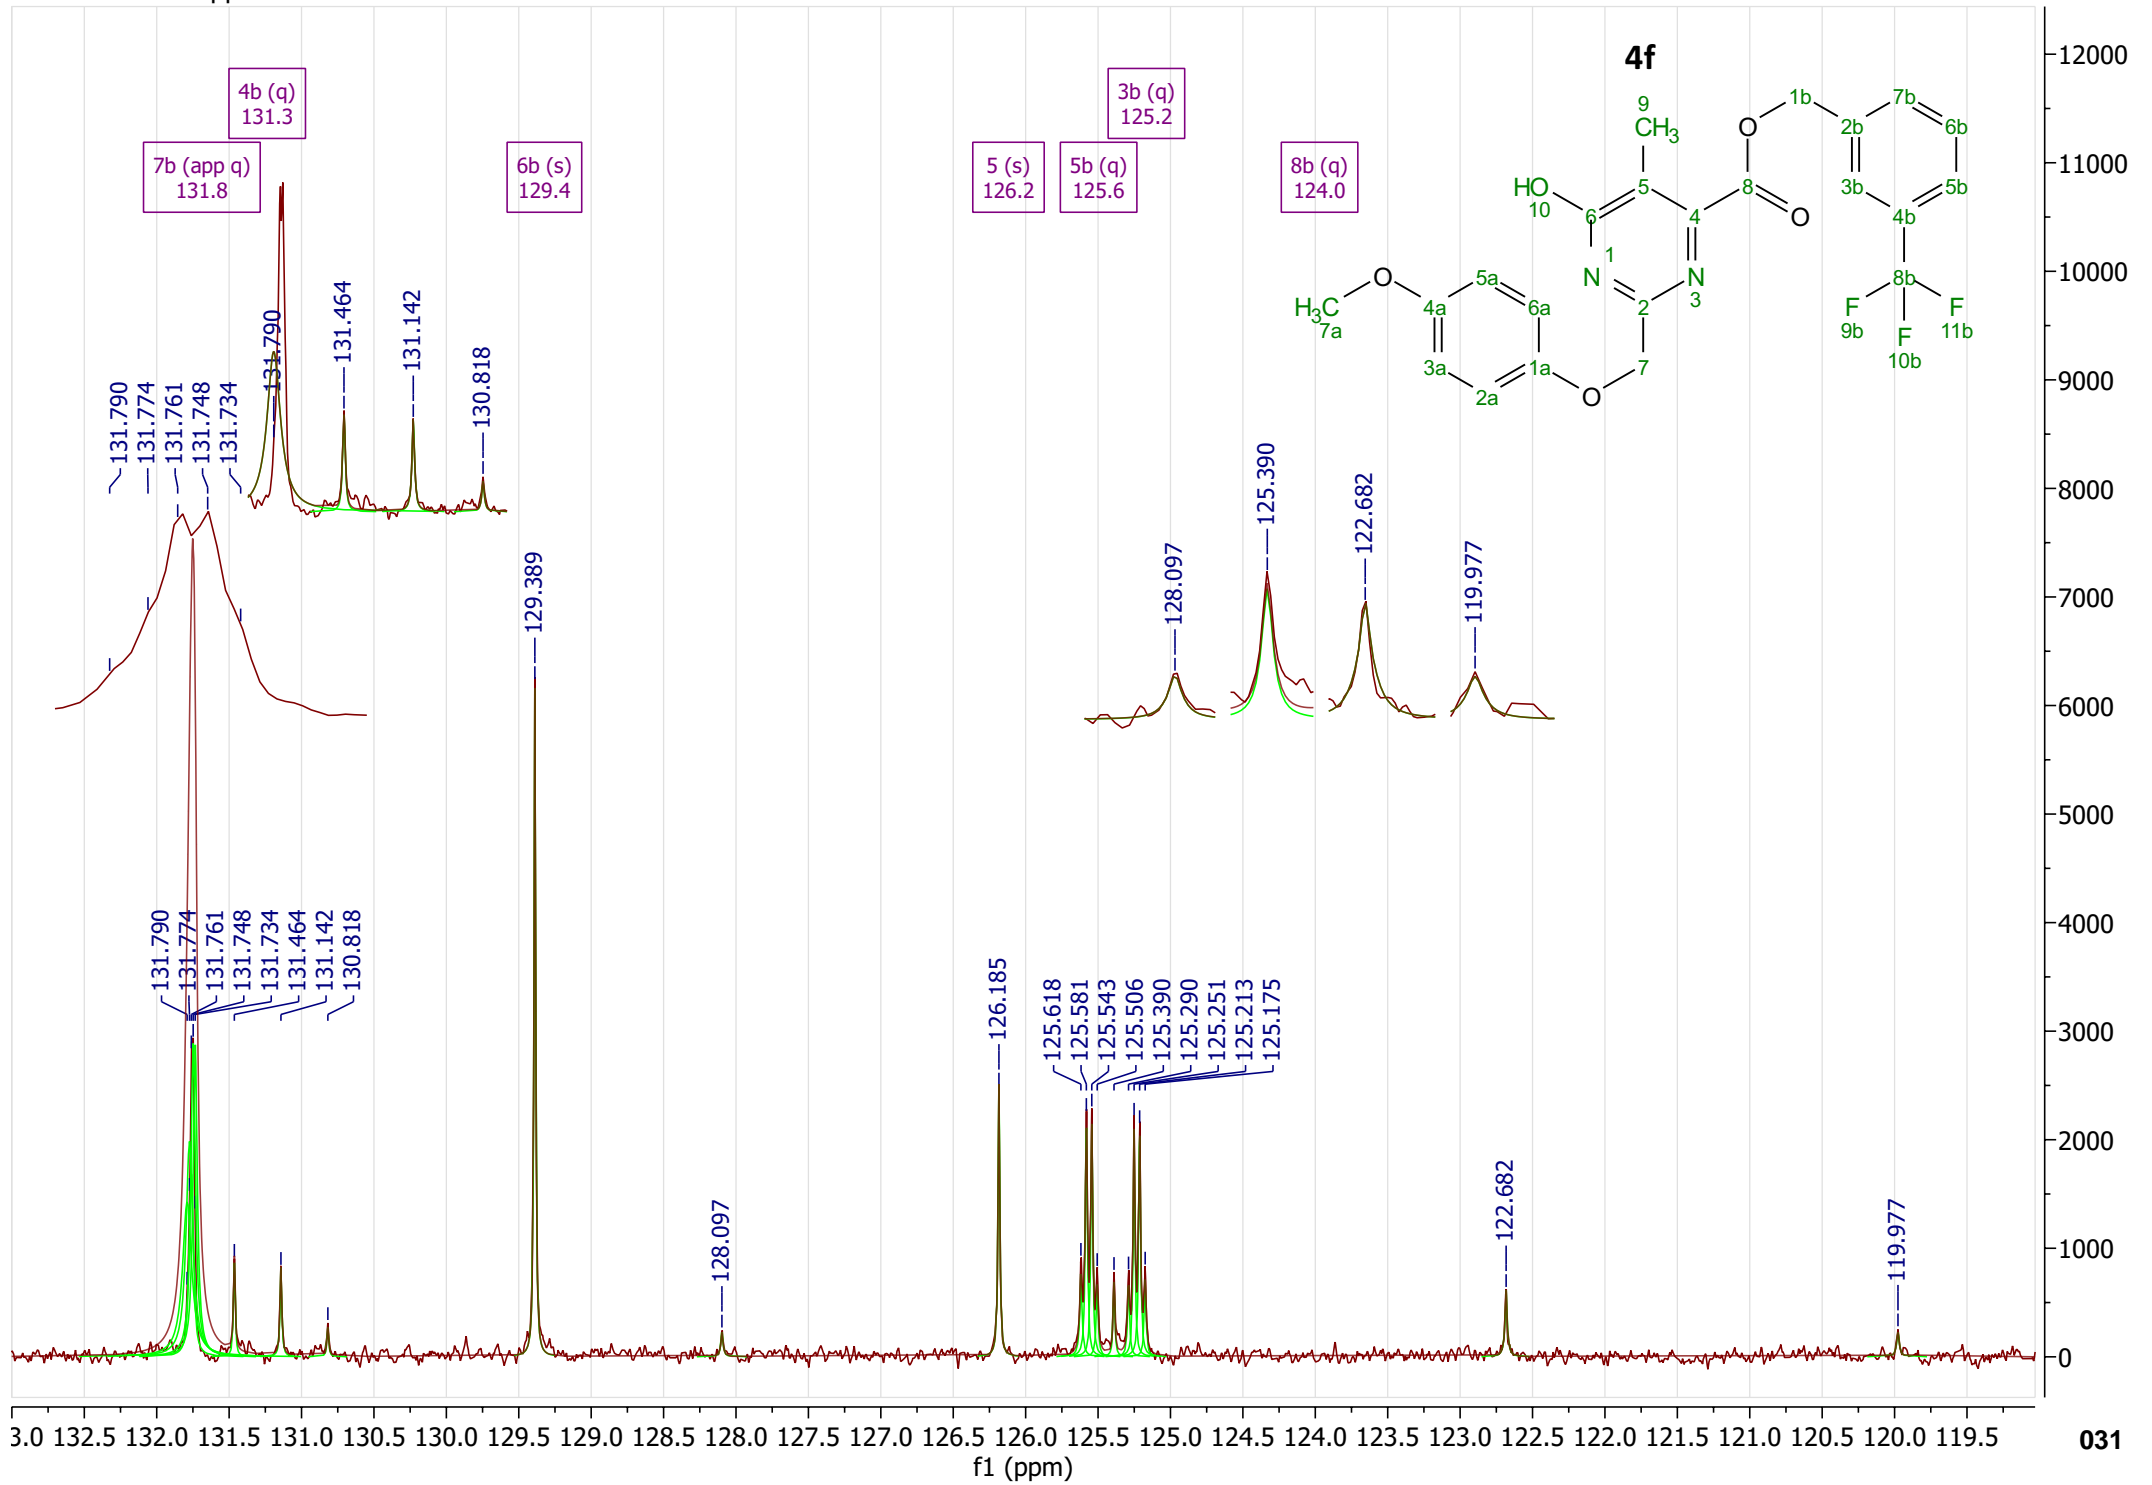

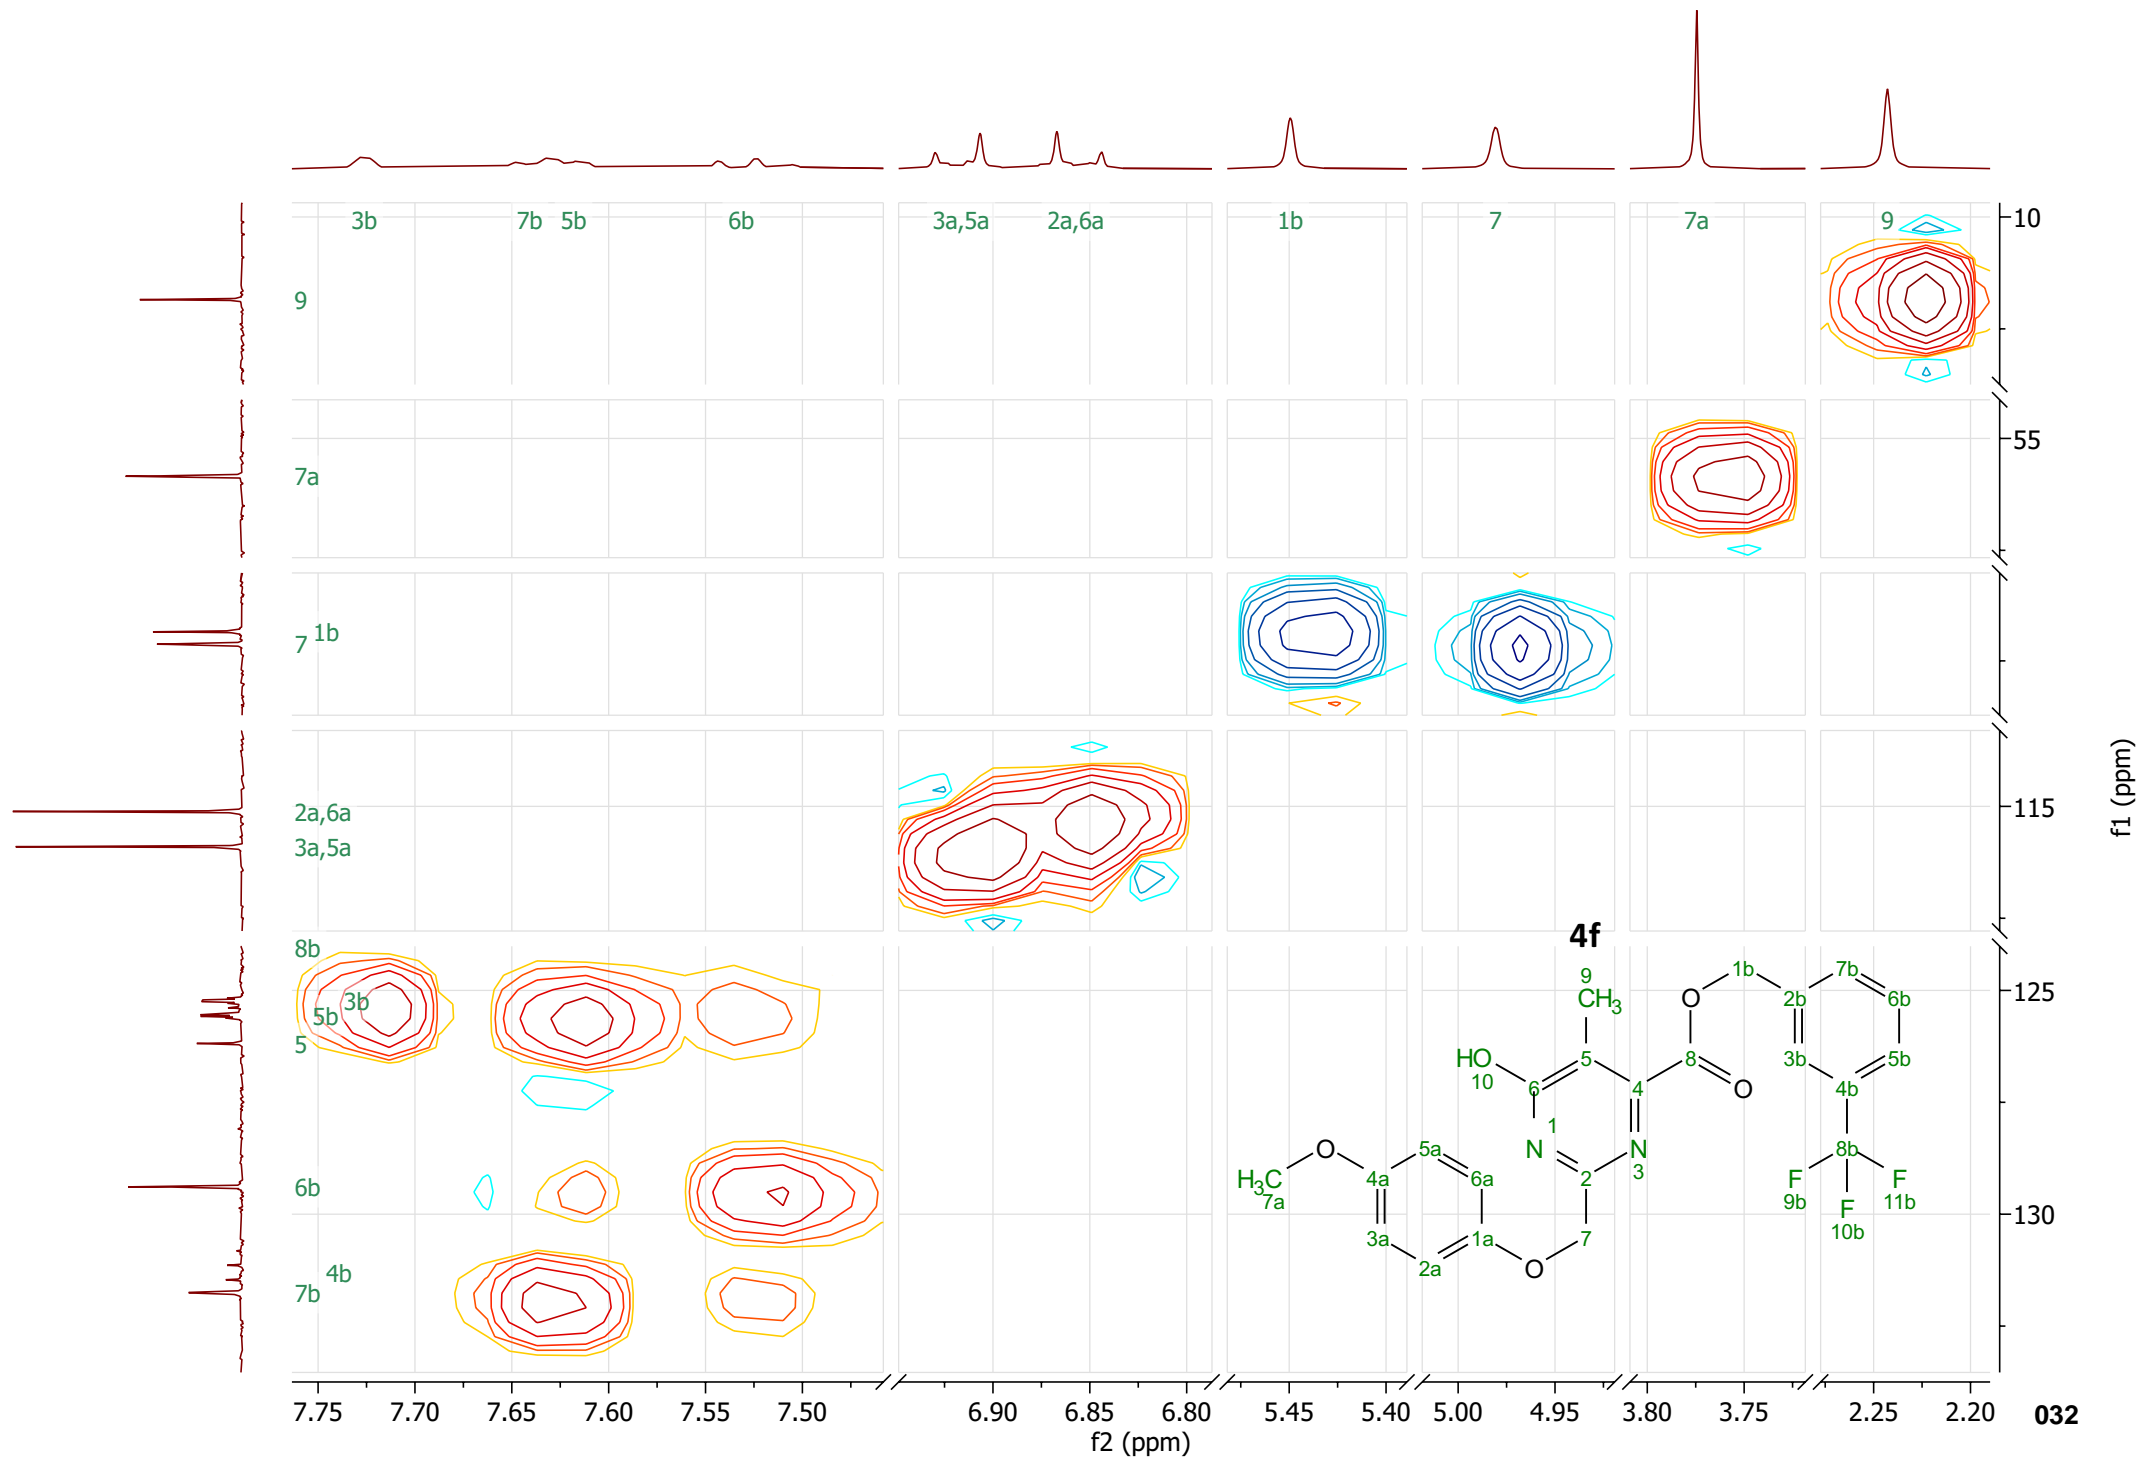



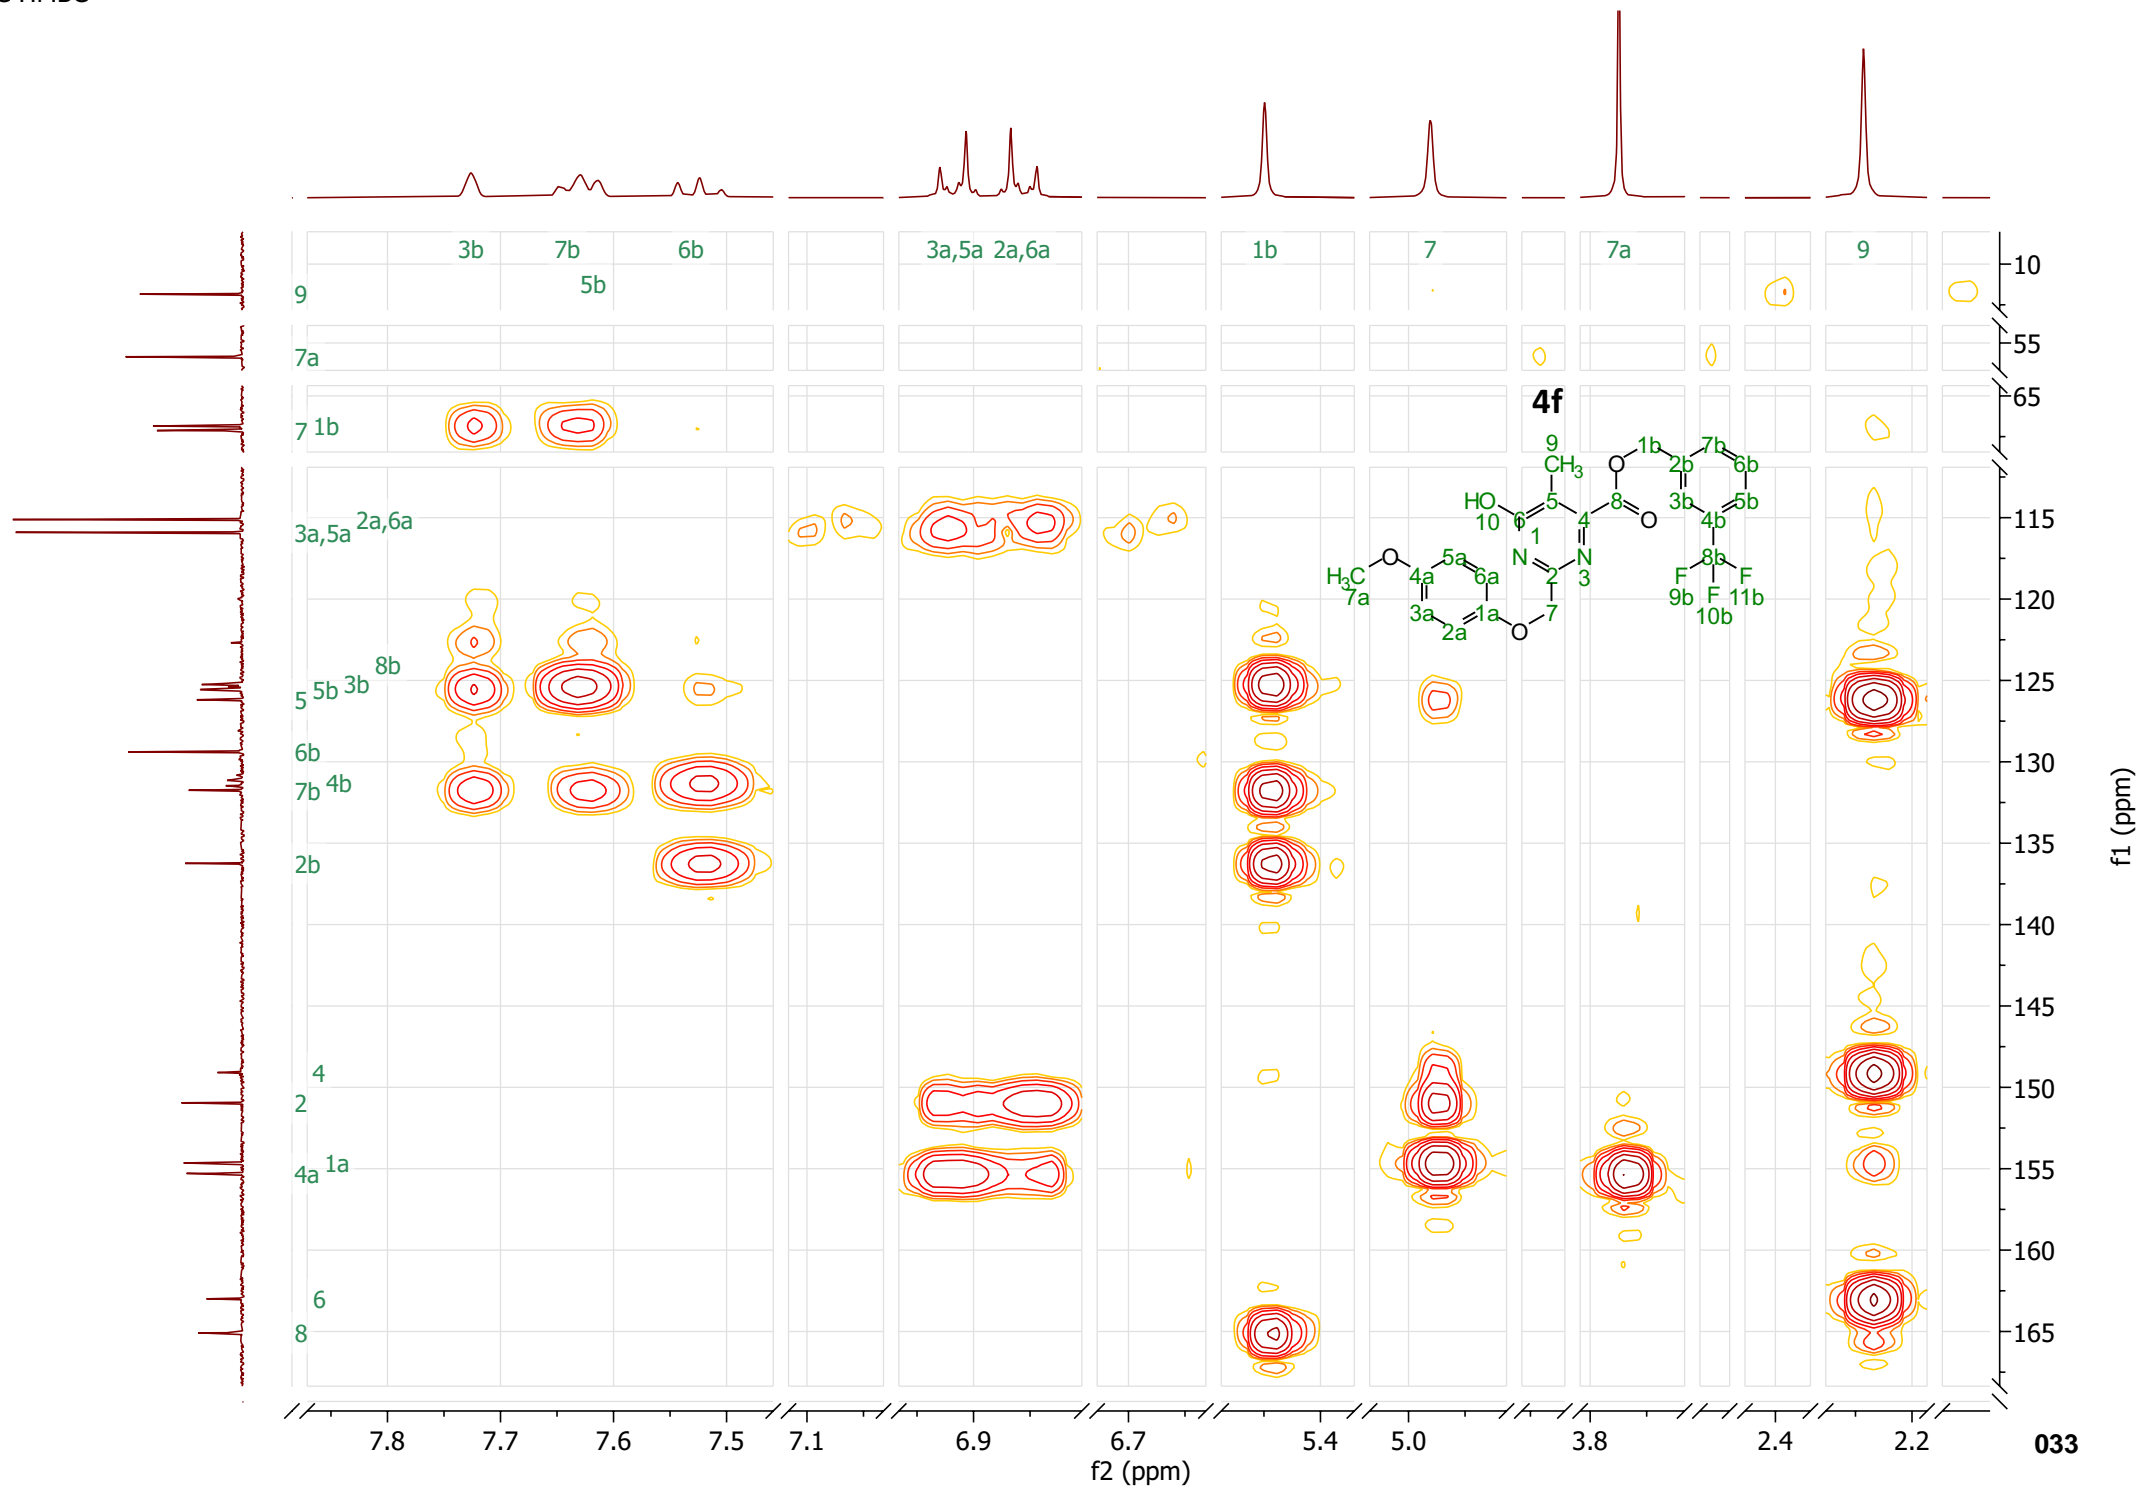

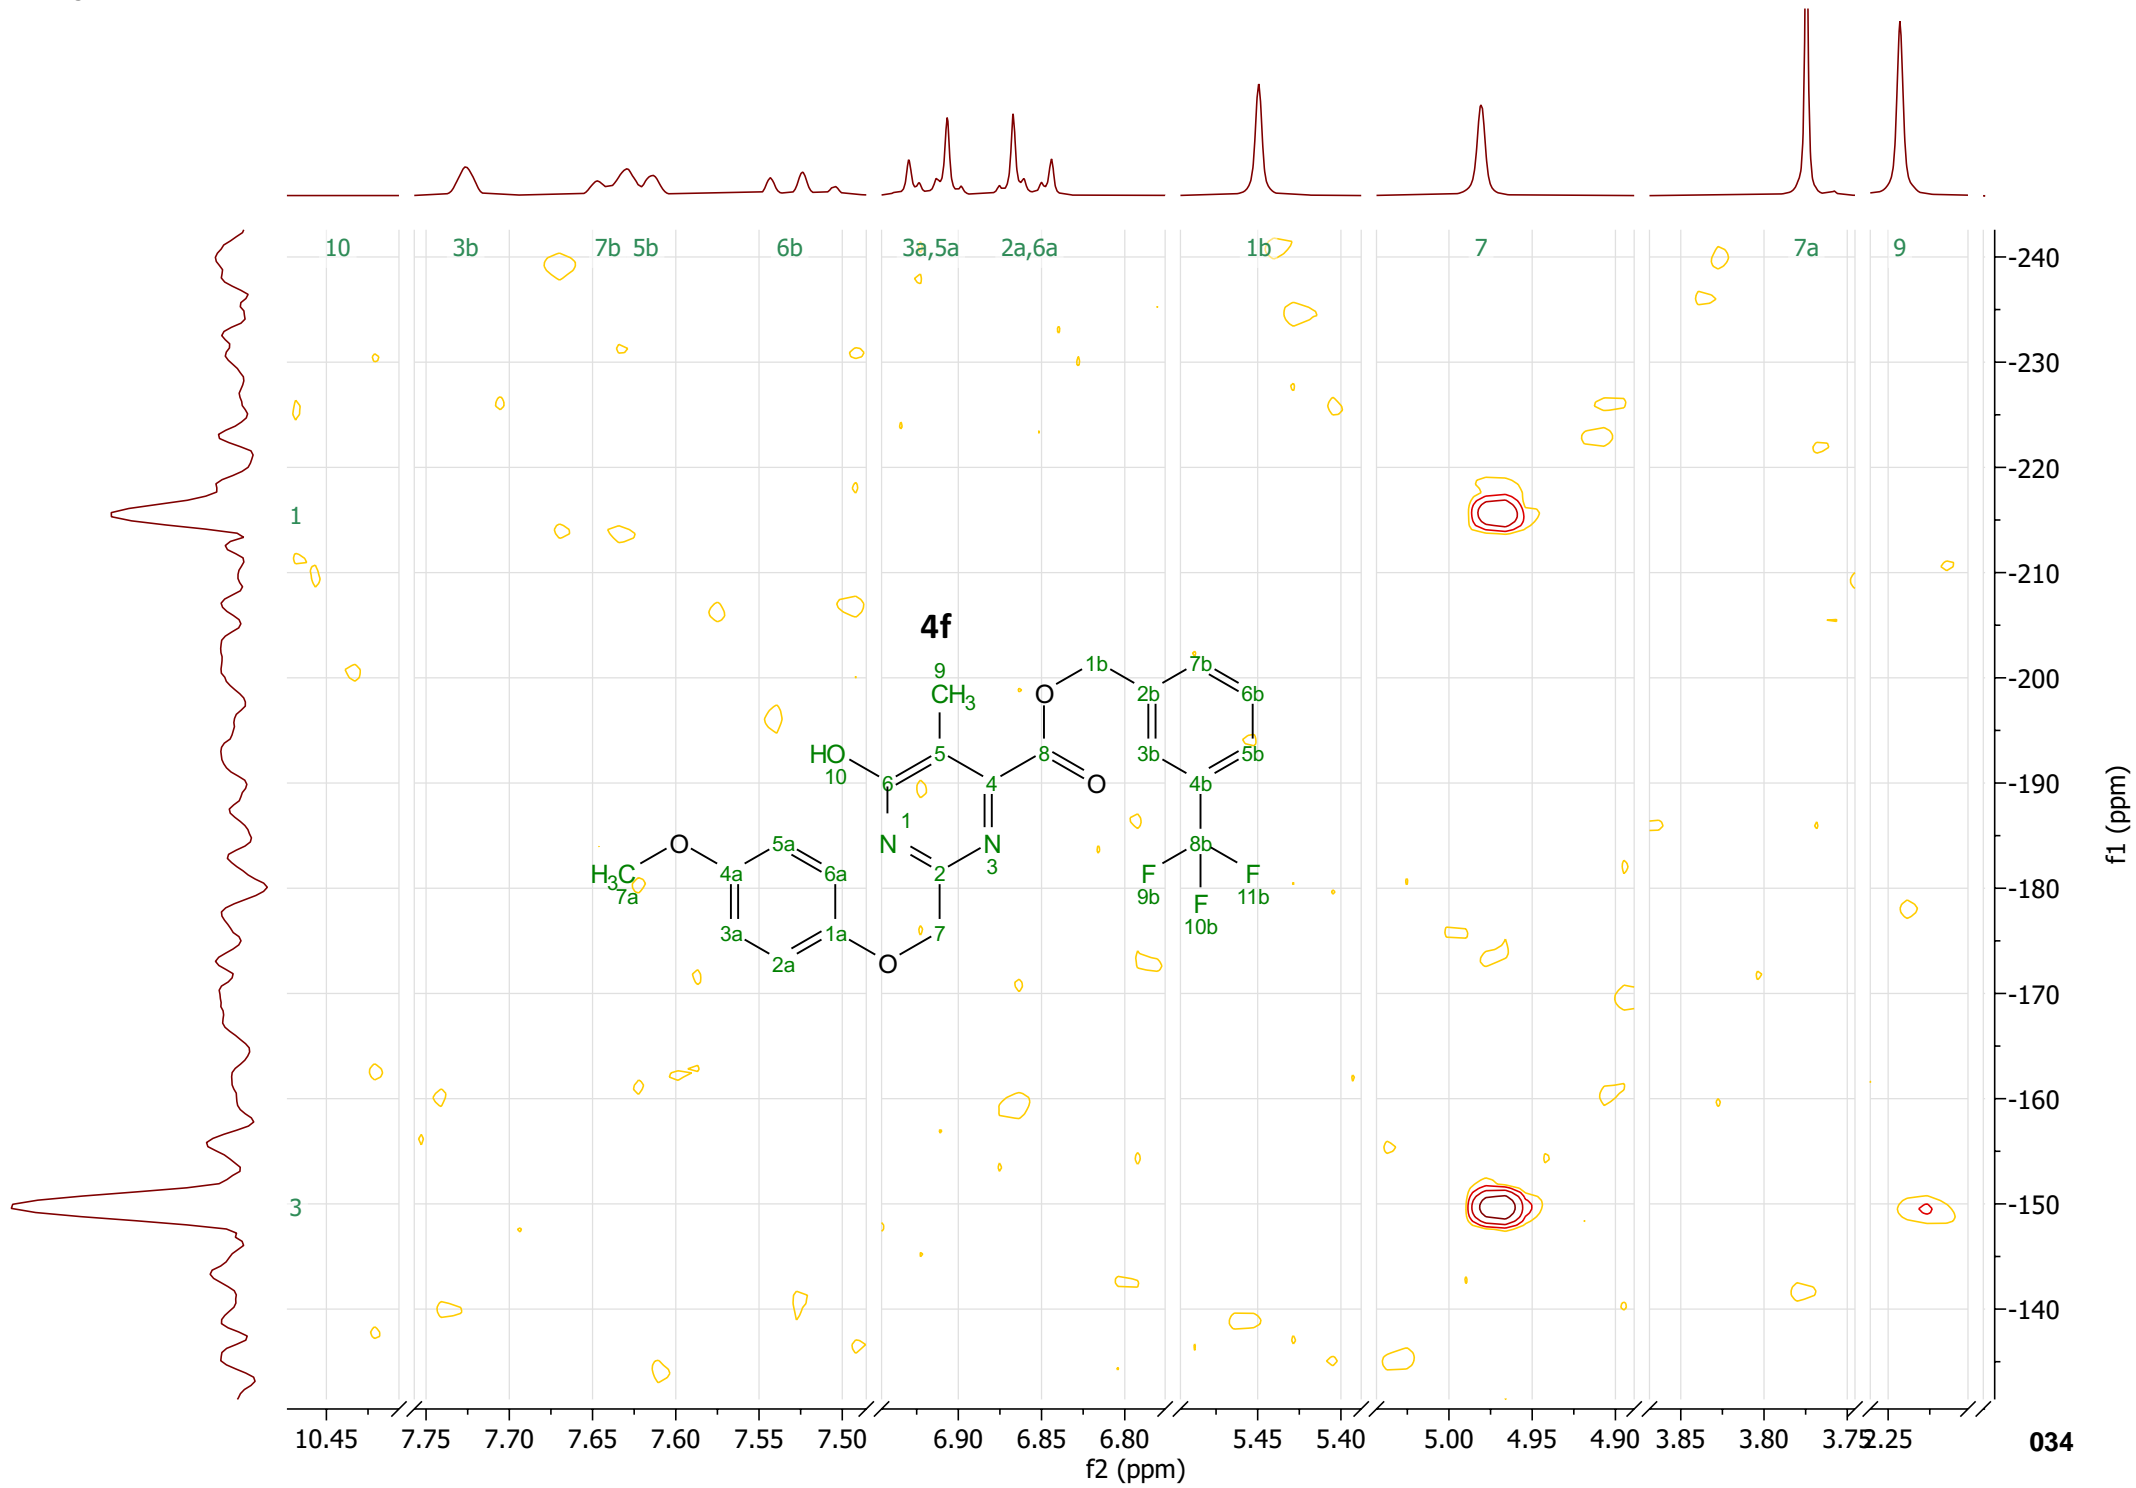

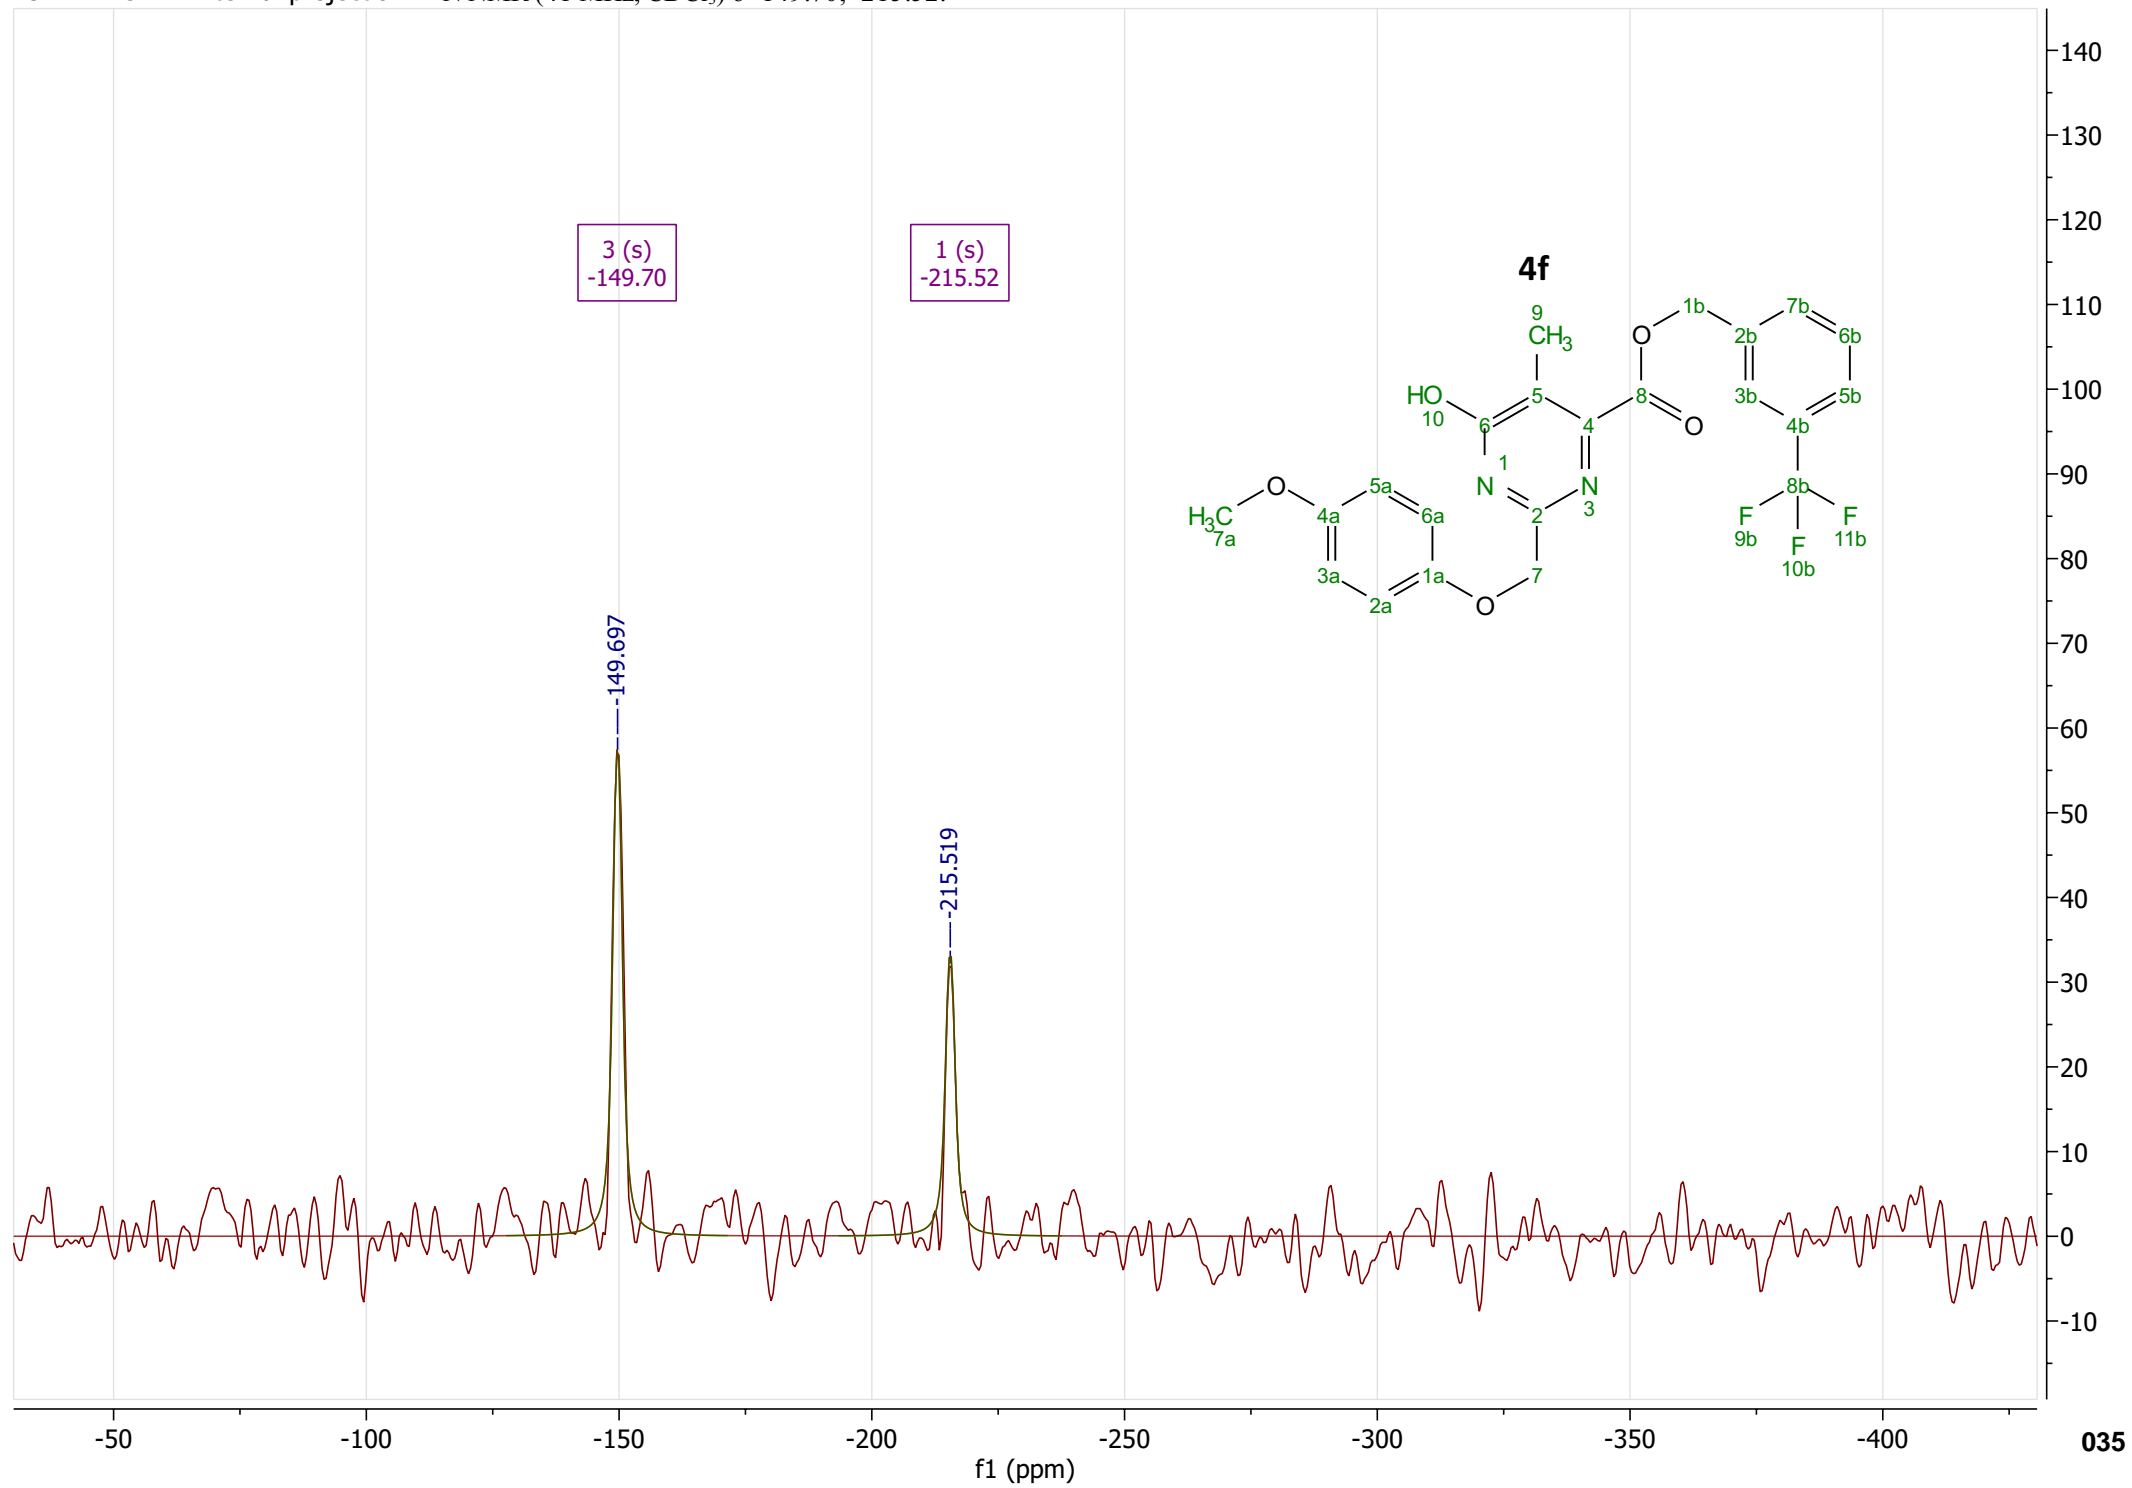

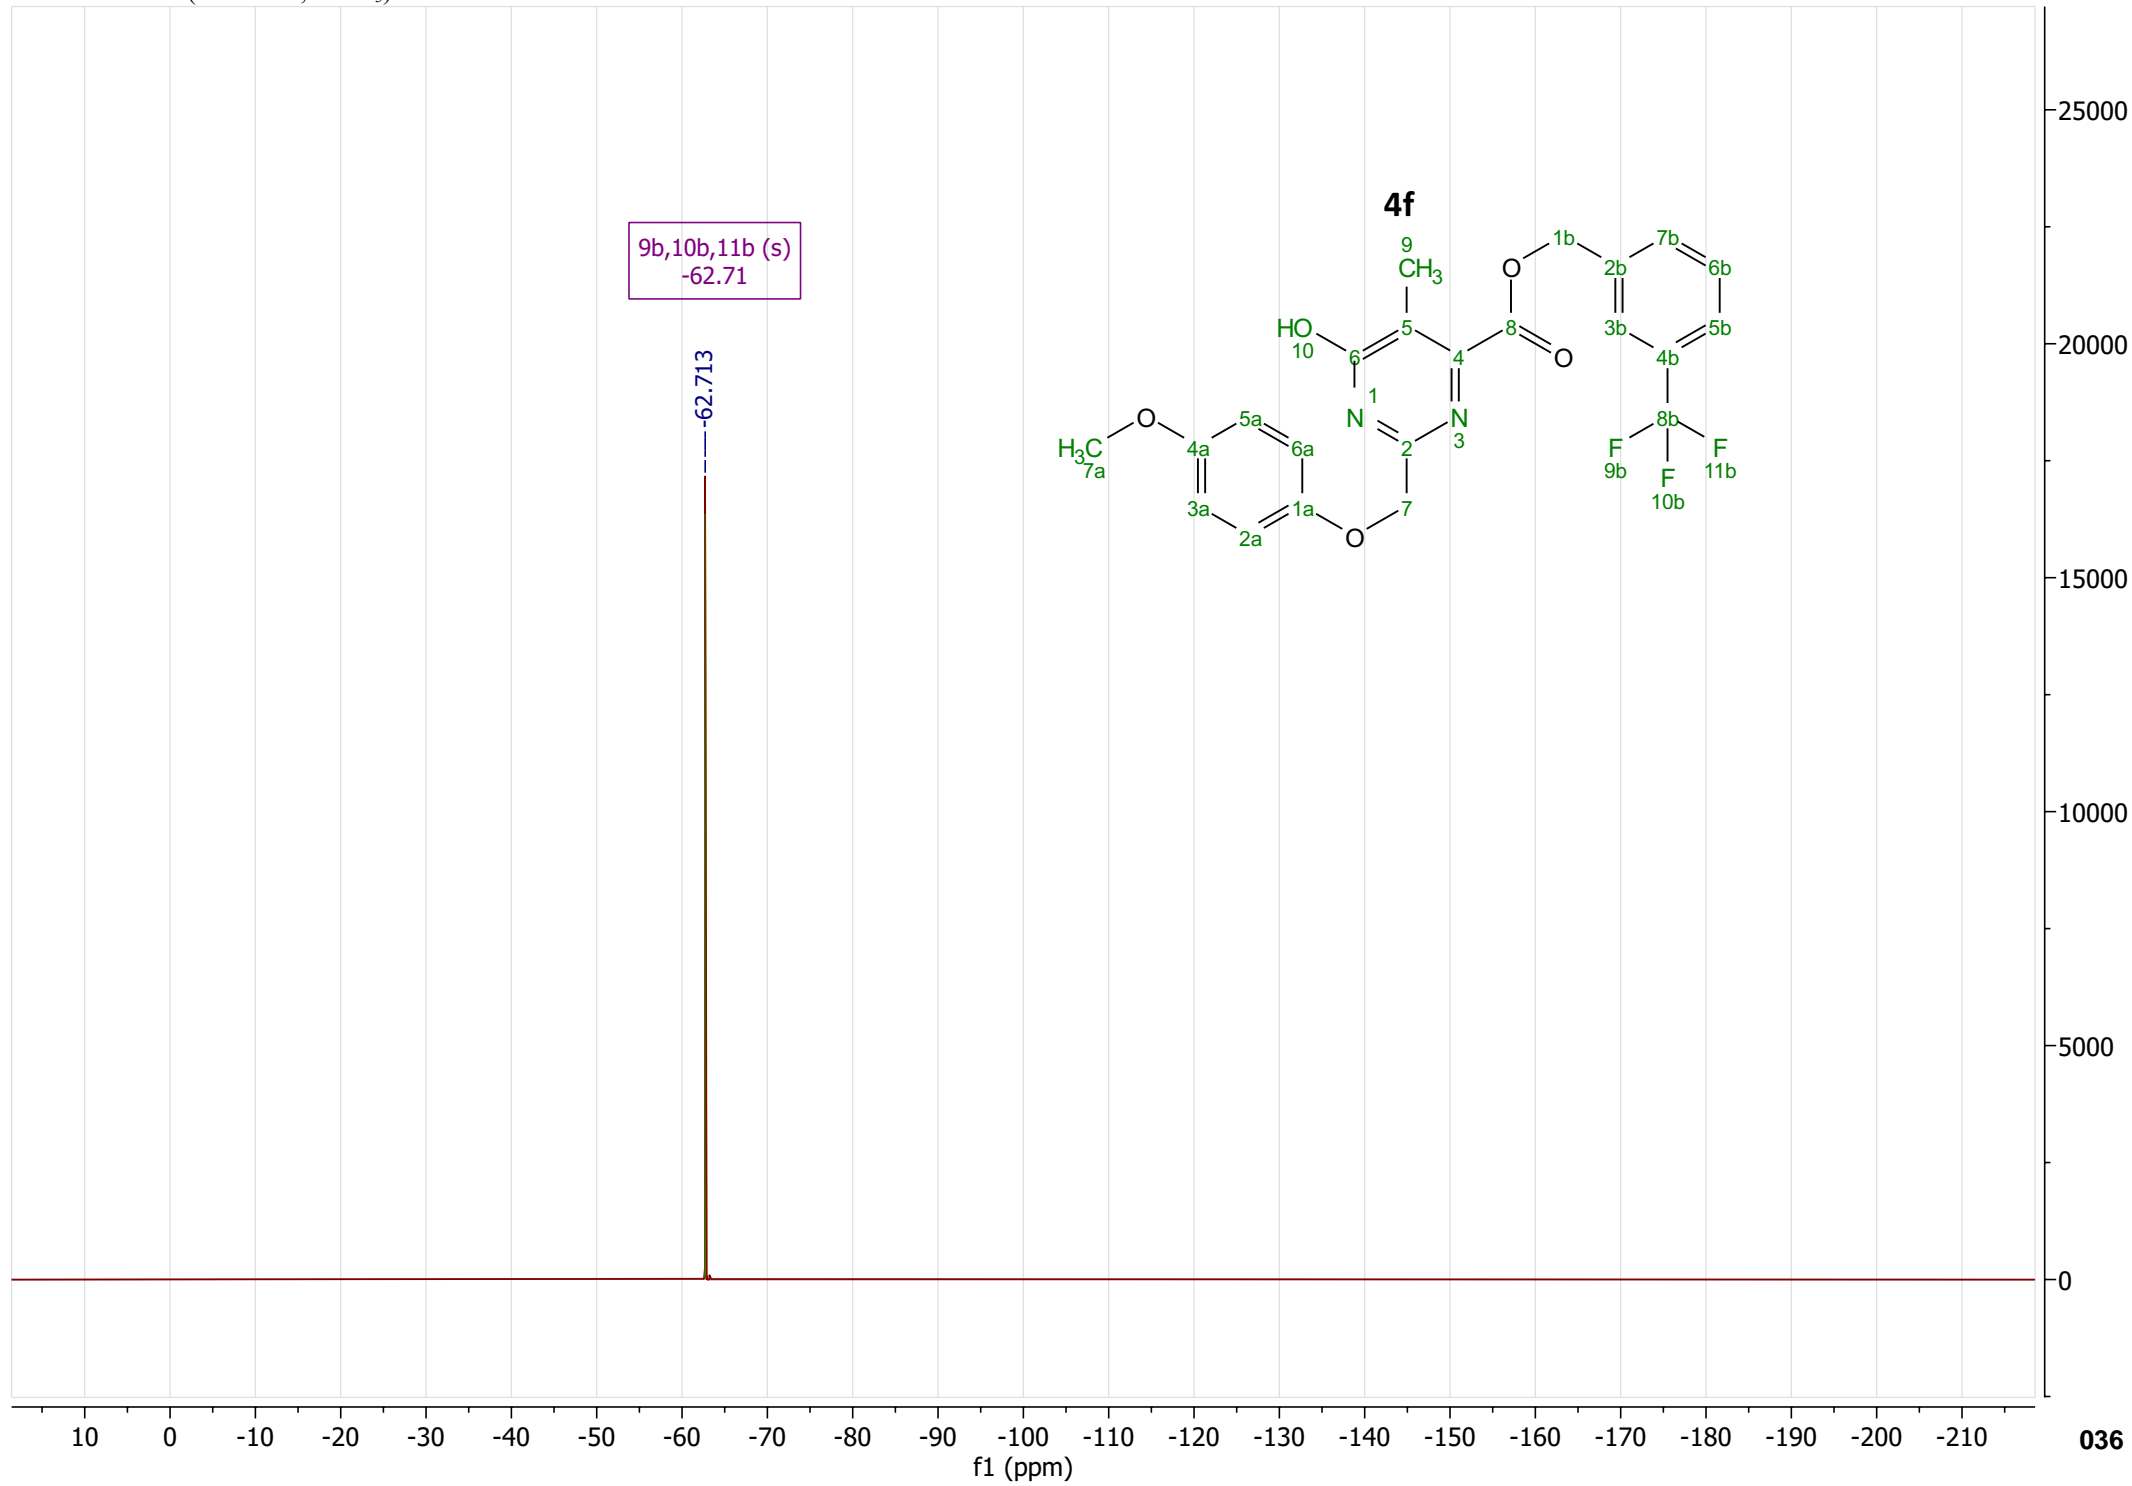

<sup>1</sup>H NMR (400 MHz, CDCl<sub>3</sub>) δ 6.99 – 6.88 (m, 2H), 6.88 – 6.72 (m, 2H), 5.13 (s, 2H), 4.38 (t, *J* = 6.8 Hz, 2H), 4.36 (t, *J* = 6.6 Hz, 2H), 3.75 (s, 3H), 2.26 (s, 3H), 1.86 – 1.72 (m, 2H), 1.74 – 1.62 (m, 2H), 1.55 – 1.31 (m, 4H), 0.96 (t, *J* = 7.4 Hz, 3H), 0.94 (t, *J* = 7.4 Hz, 3H).

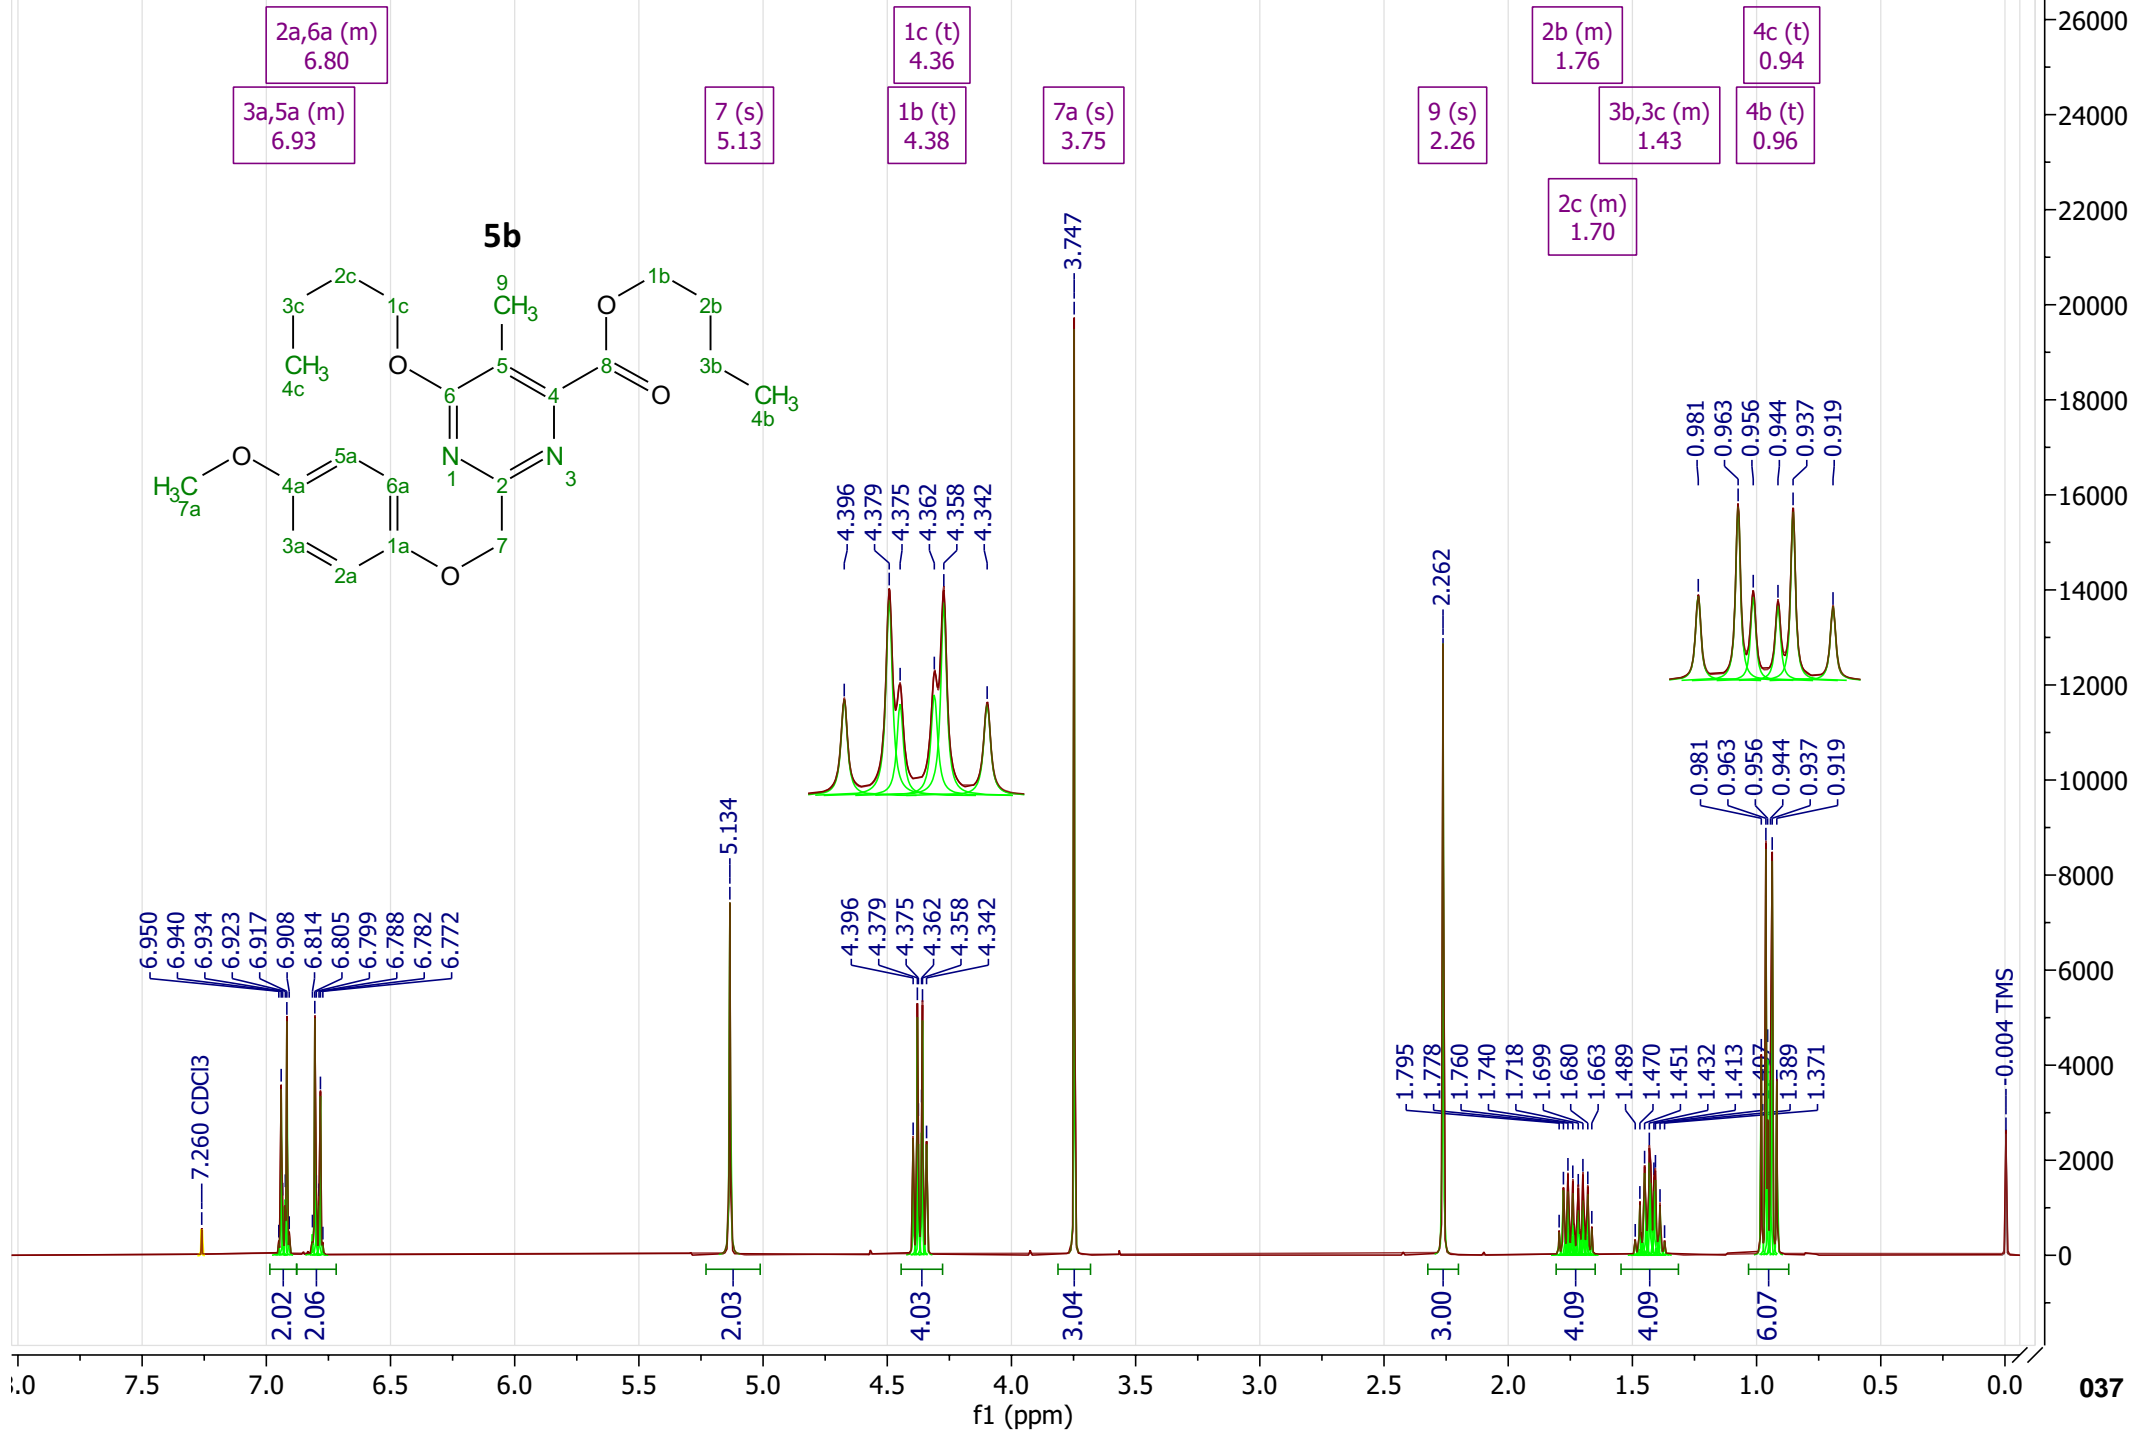

<sup>13</sup>C NMR (101 MHz, CDCl<sub>3</sub>) δ 169.3, 165.9, 163.1, 155.1, 154.1, 152.9, 116.6, 116.1 (sym, 2C), 114.6 (sym, 2C), 71.2, 67.3, 66.1, 55.8, 30.8, 30.7, 19.28, 19.27, 13.9, 13.8, 11.1.

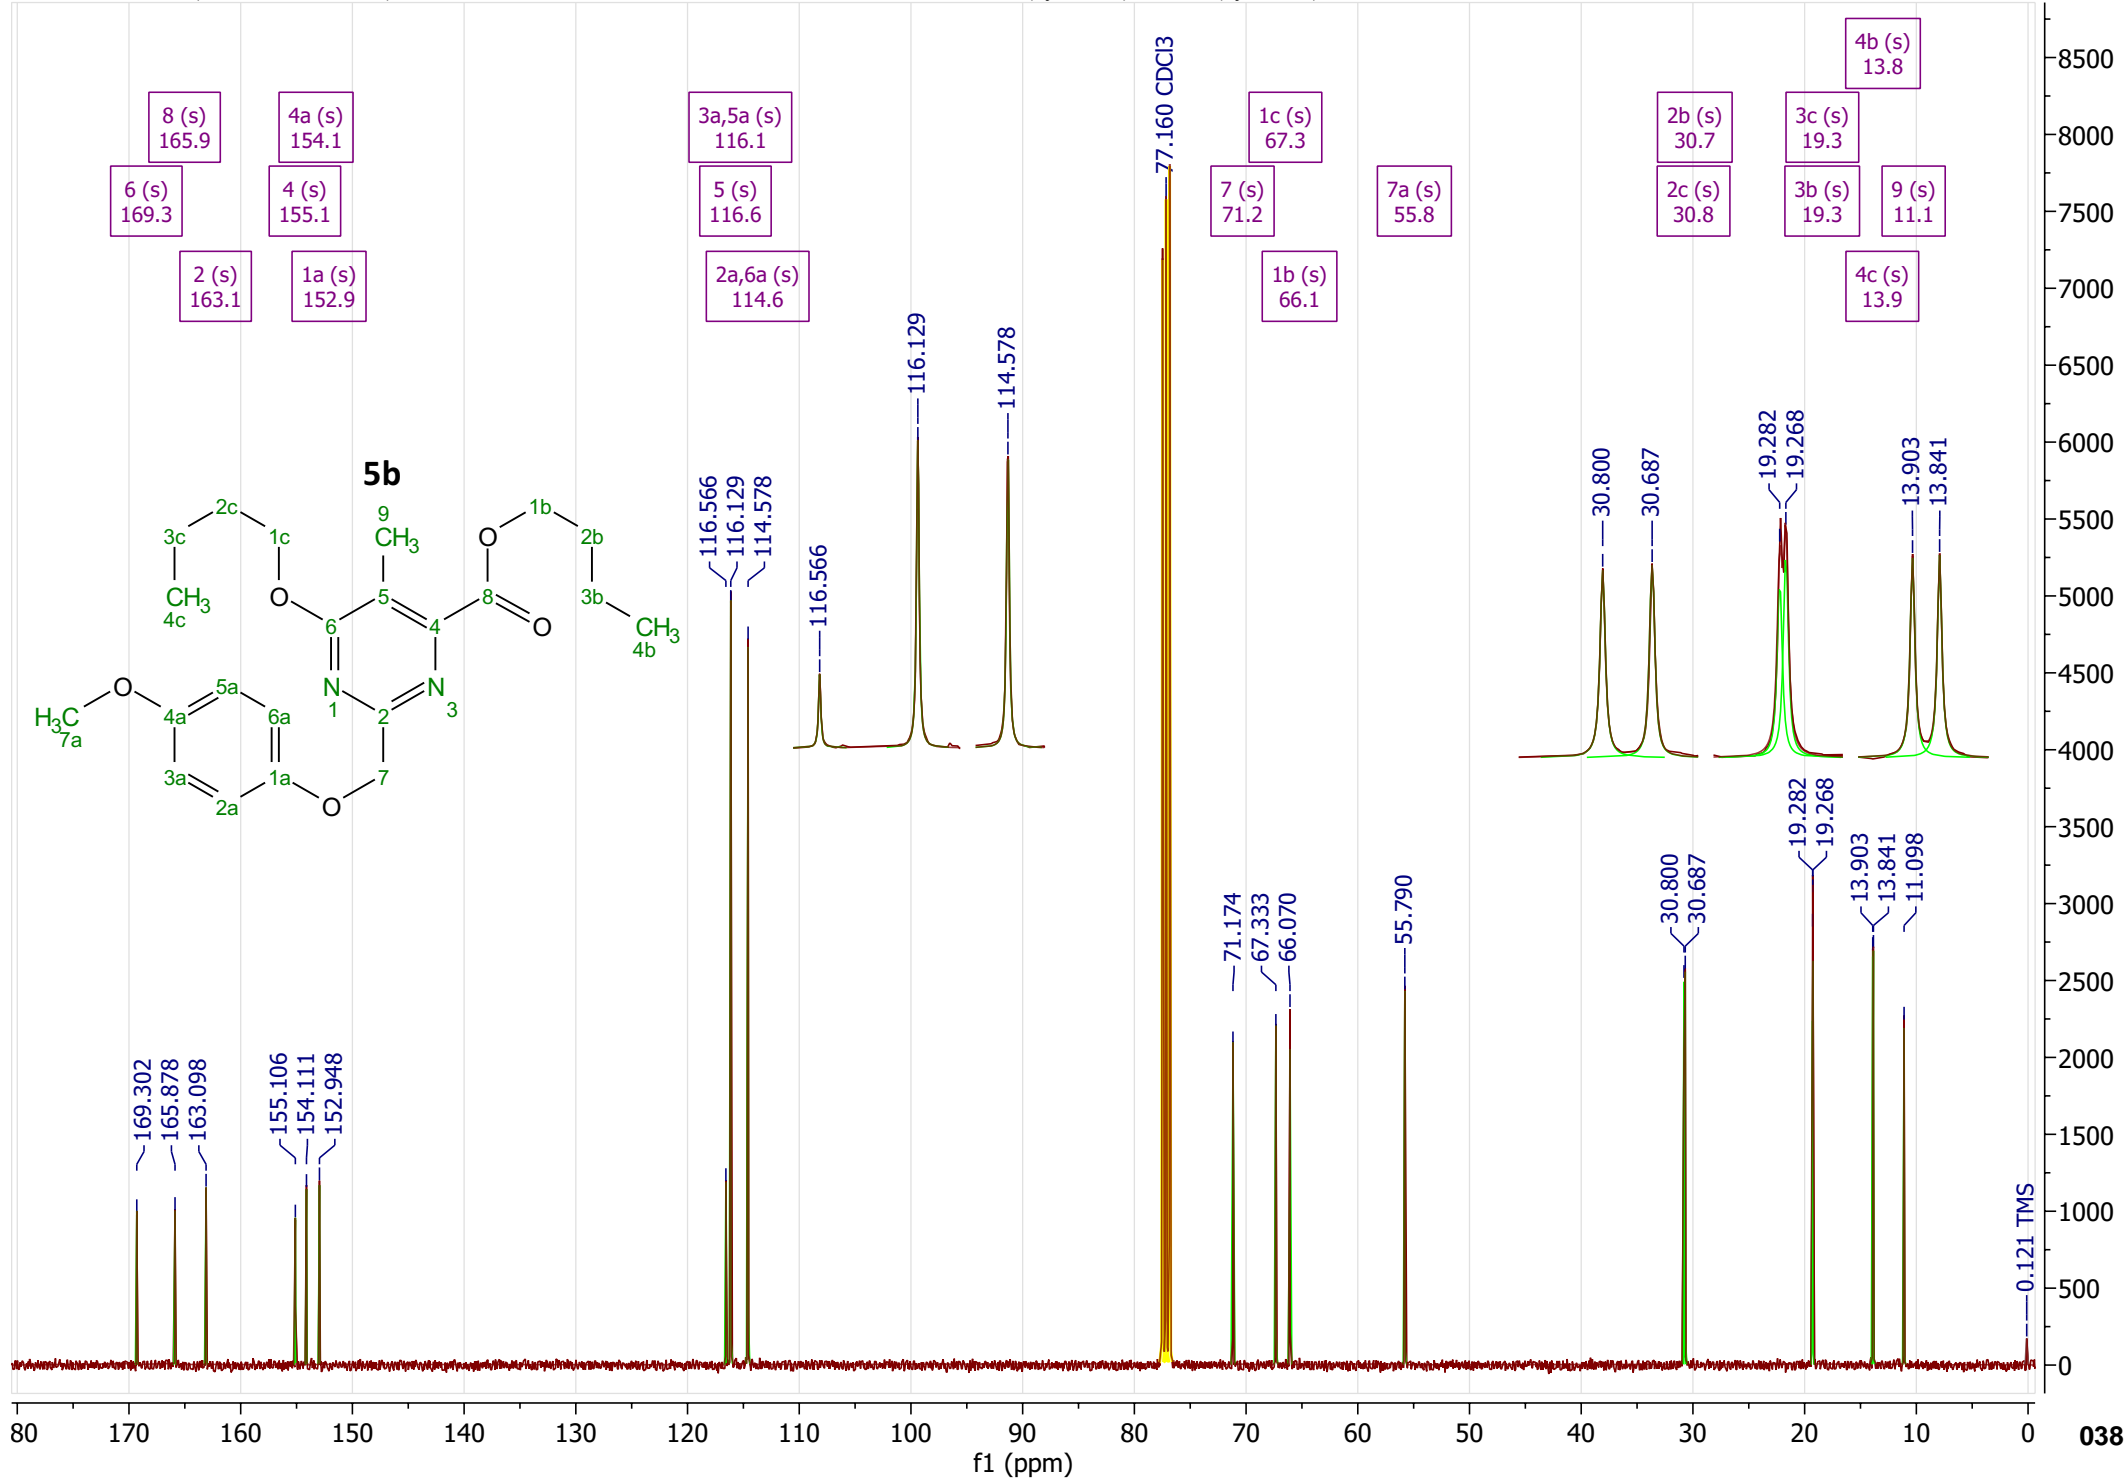

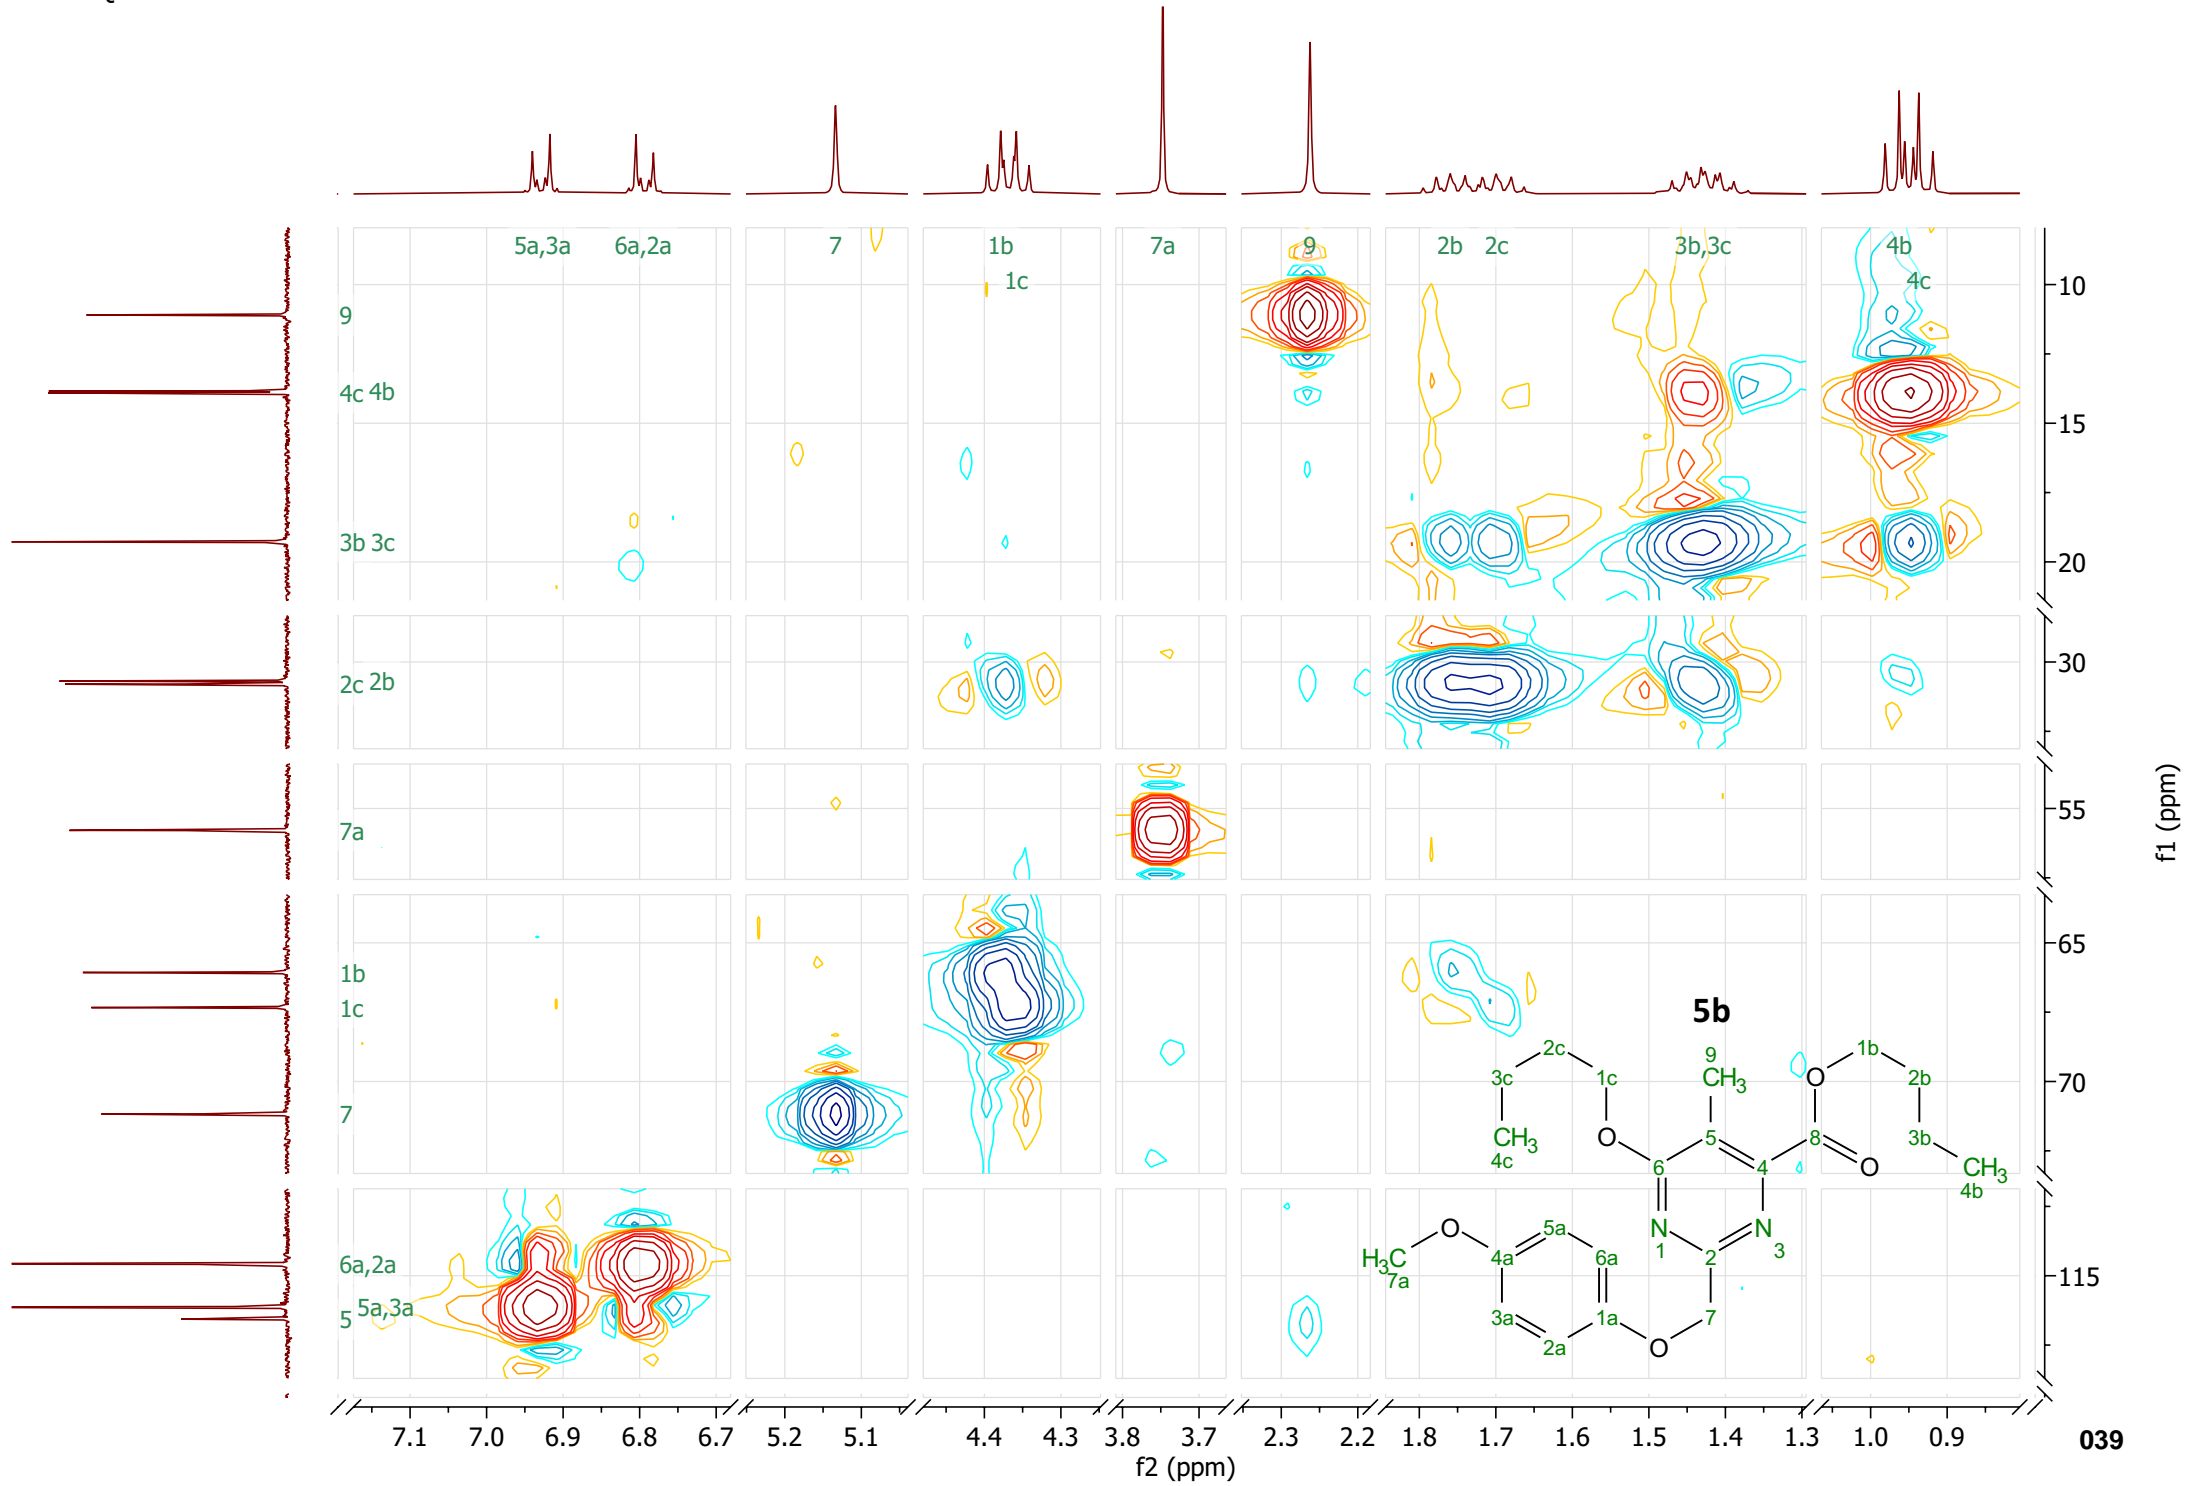

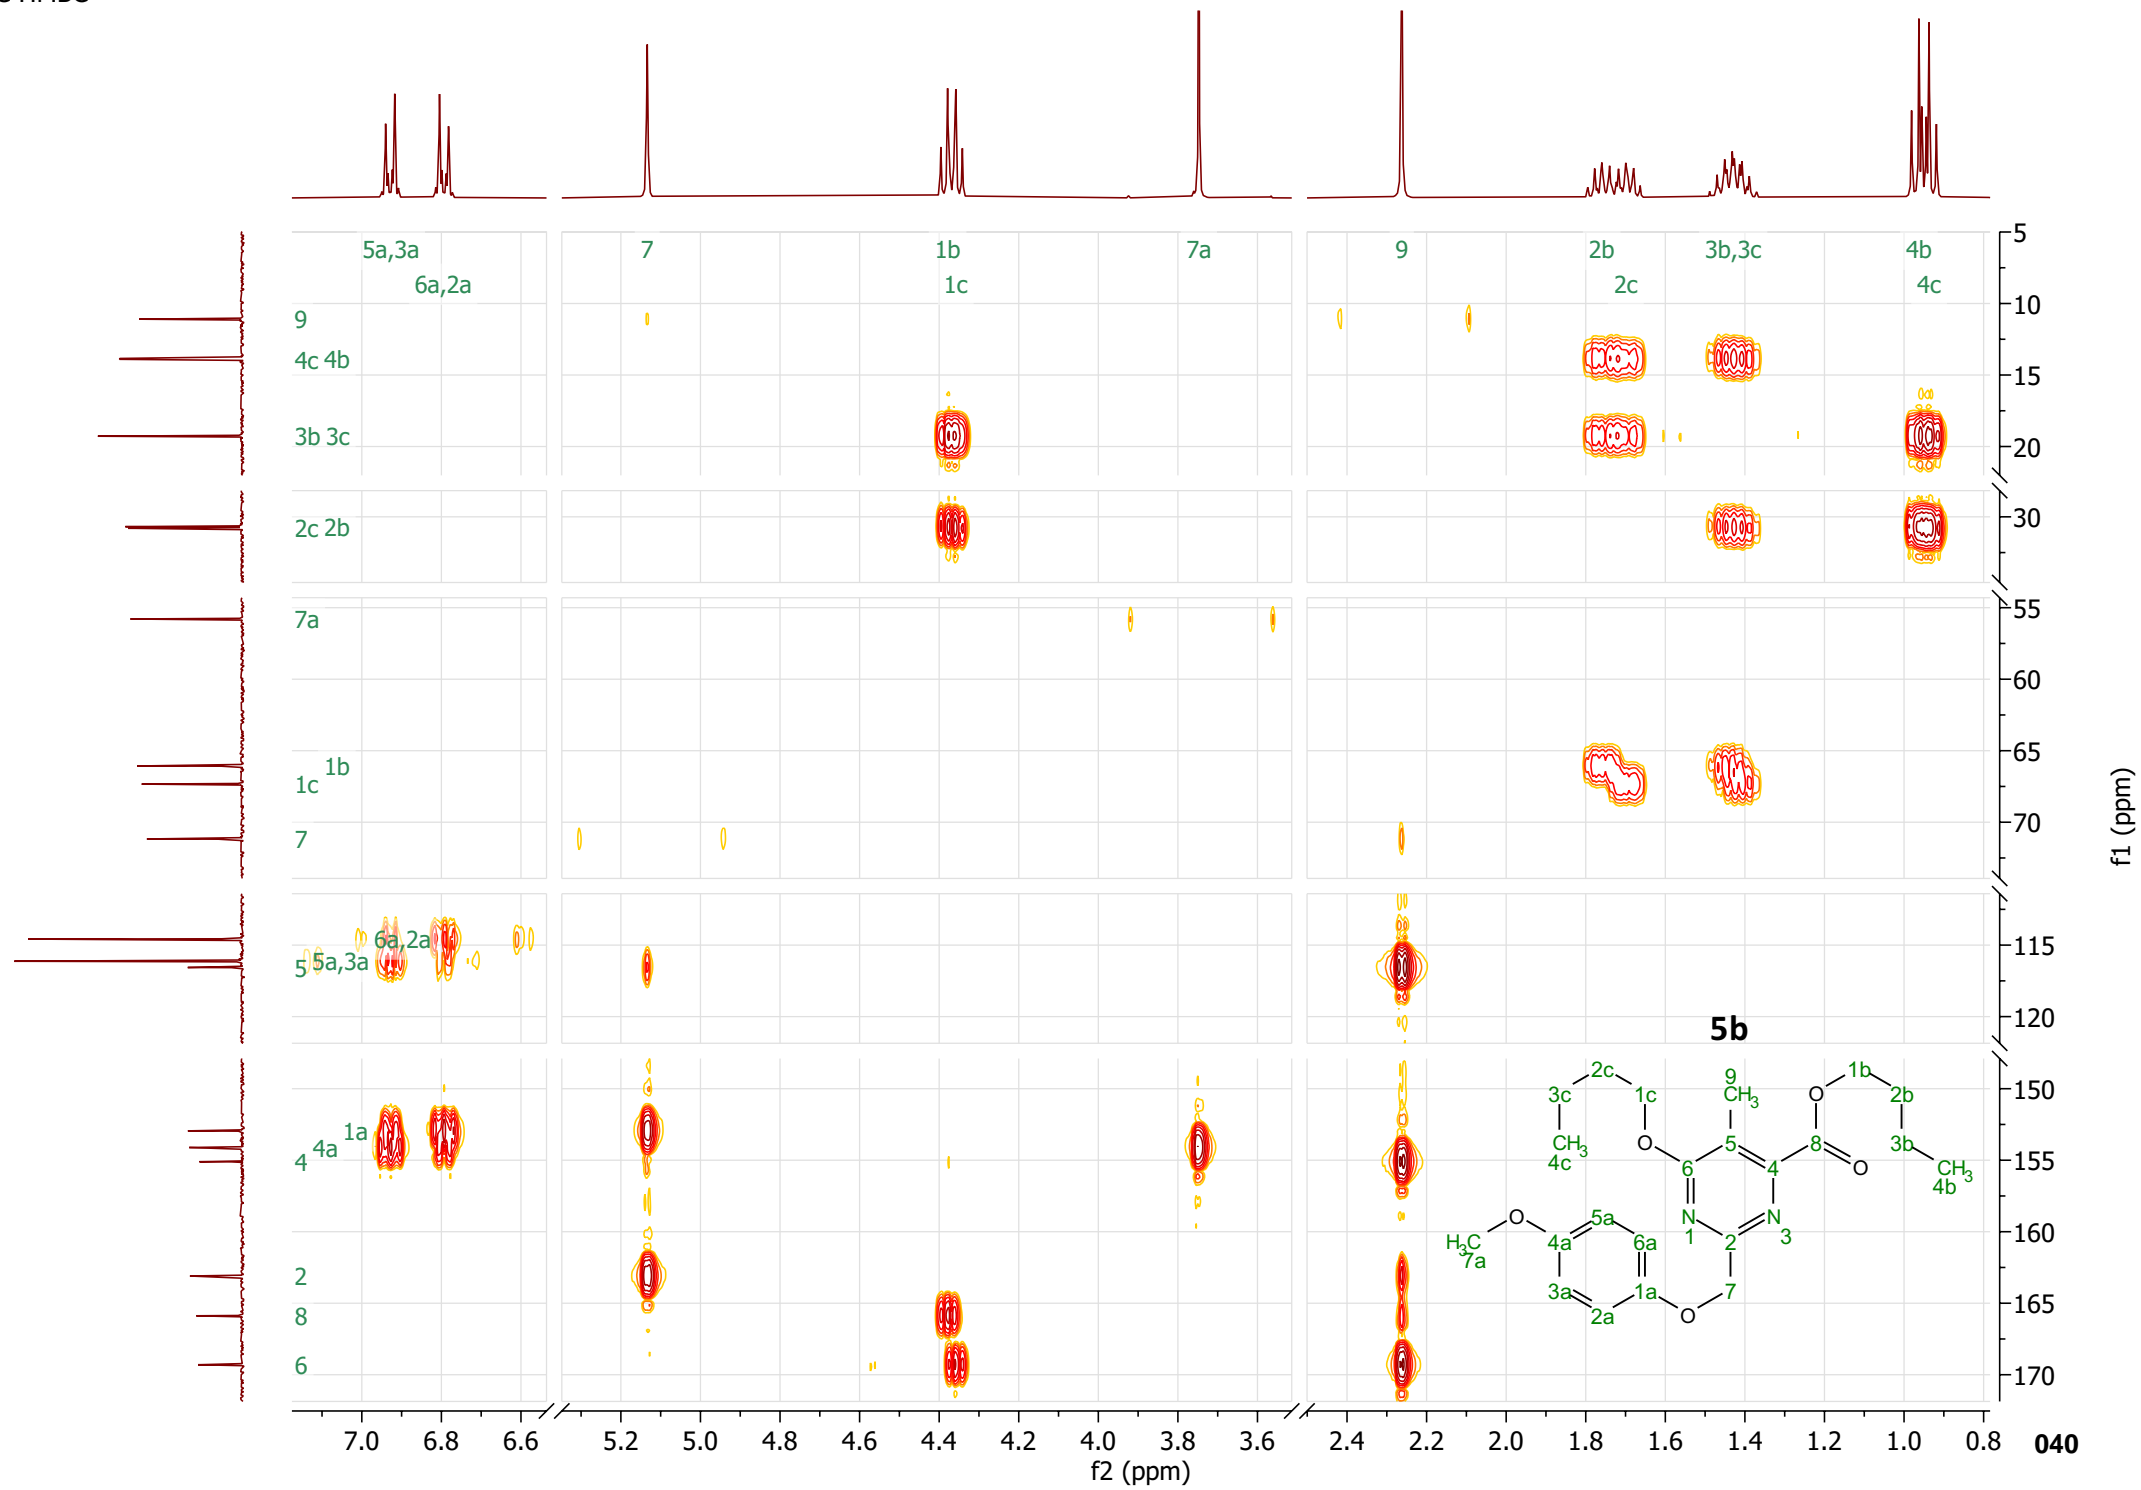



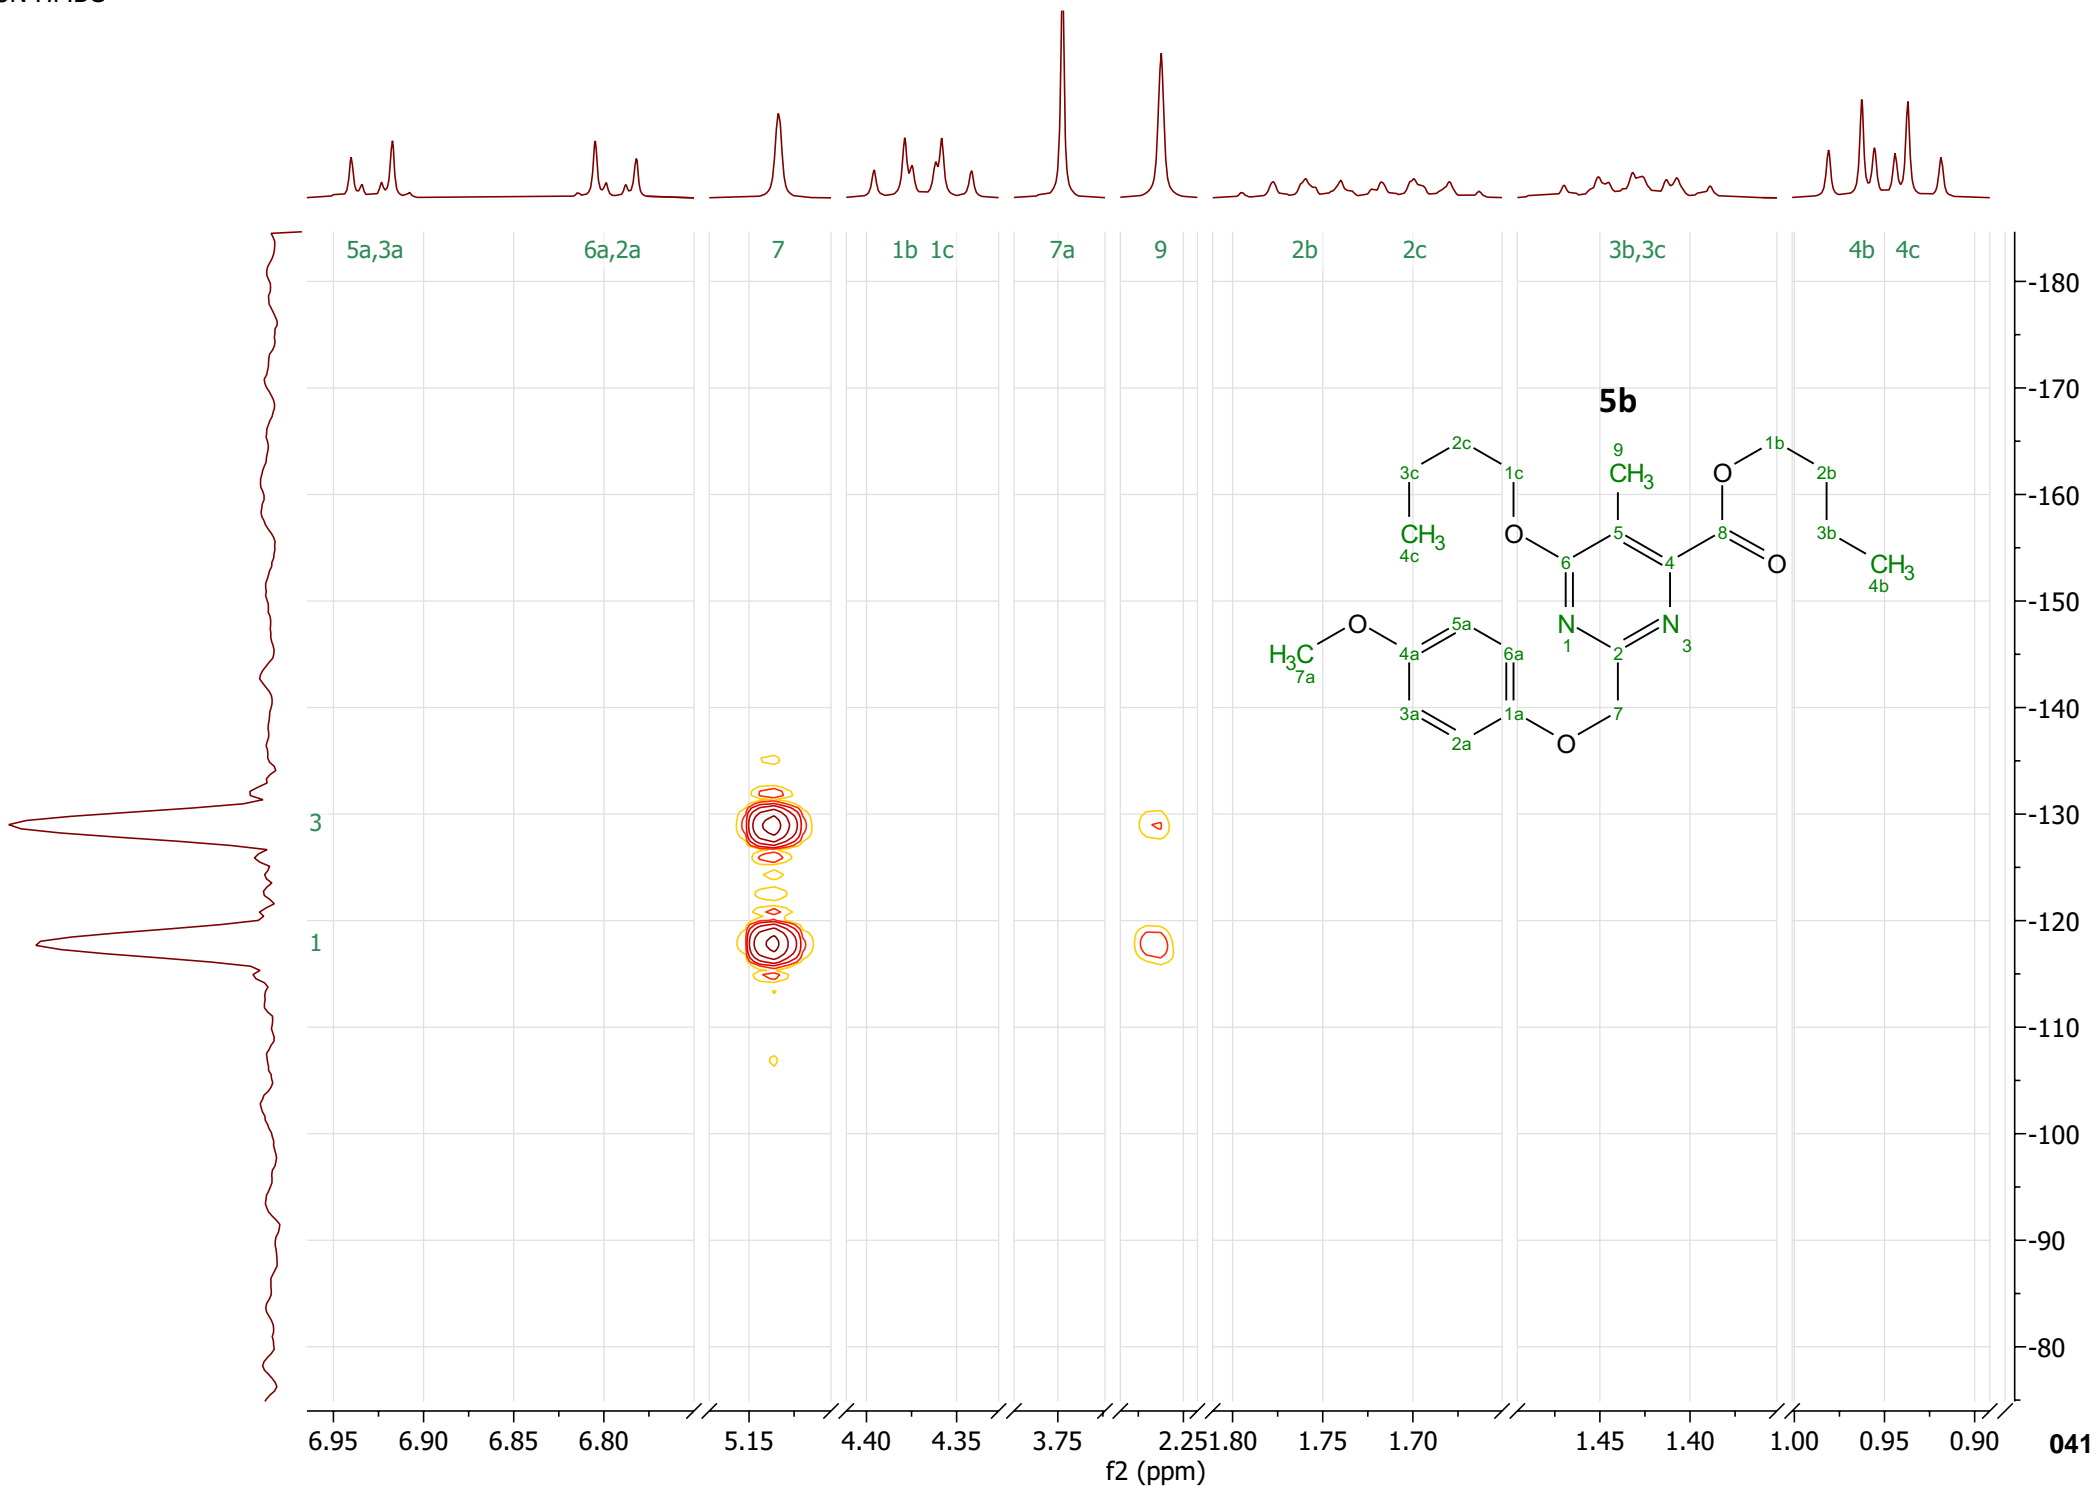

15N HMBC - f1 internal projection <sup>15</sup>N NMR (41 MHz, CDCl<sub>3</sub>) δ -118.0, -129.3.

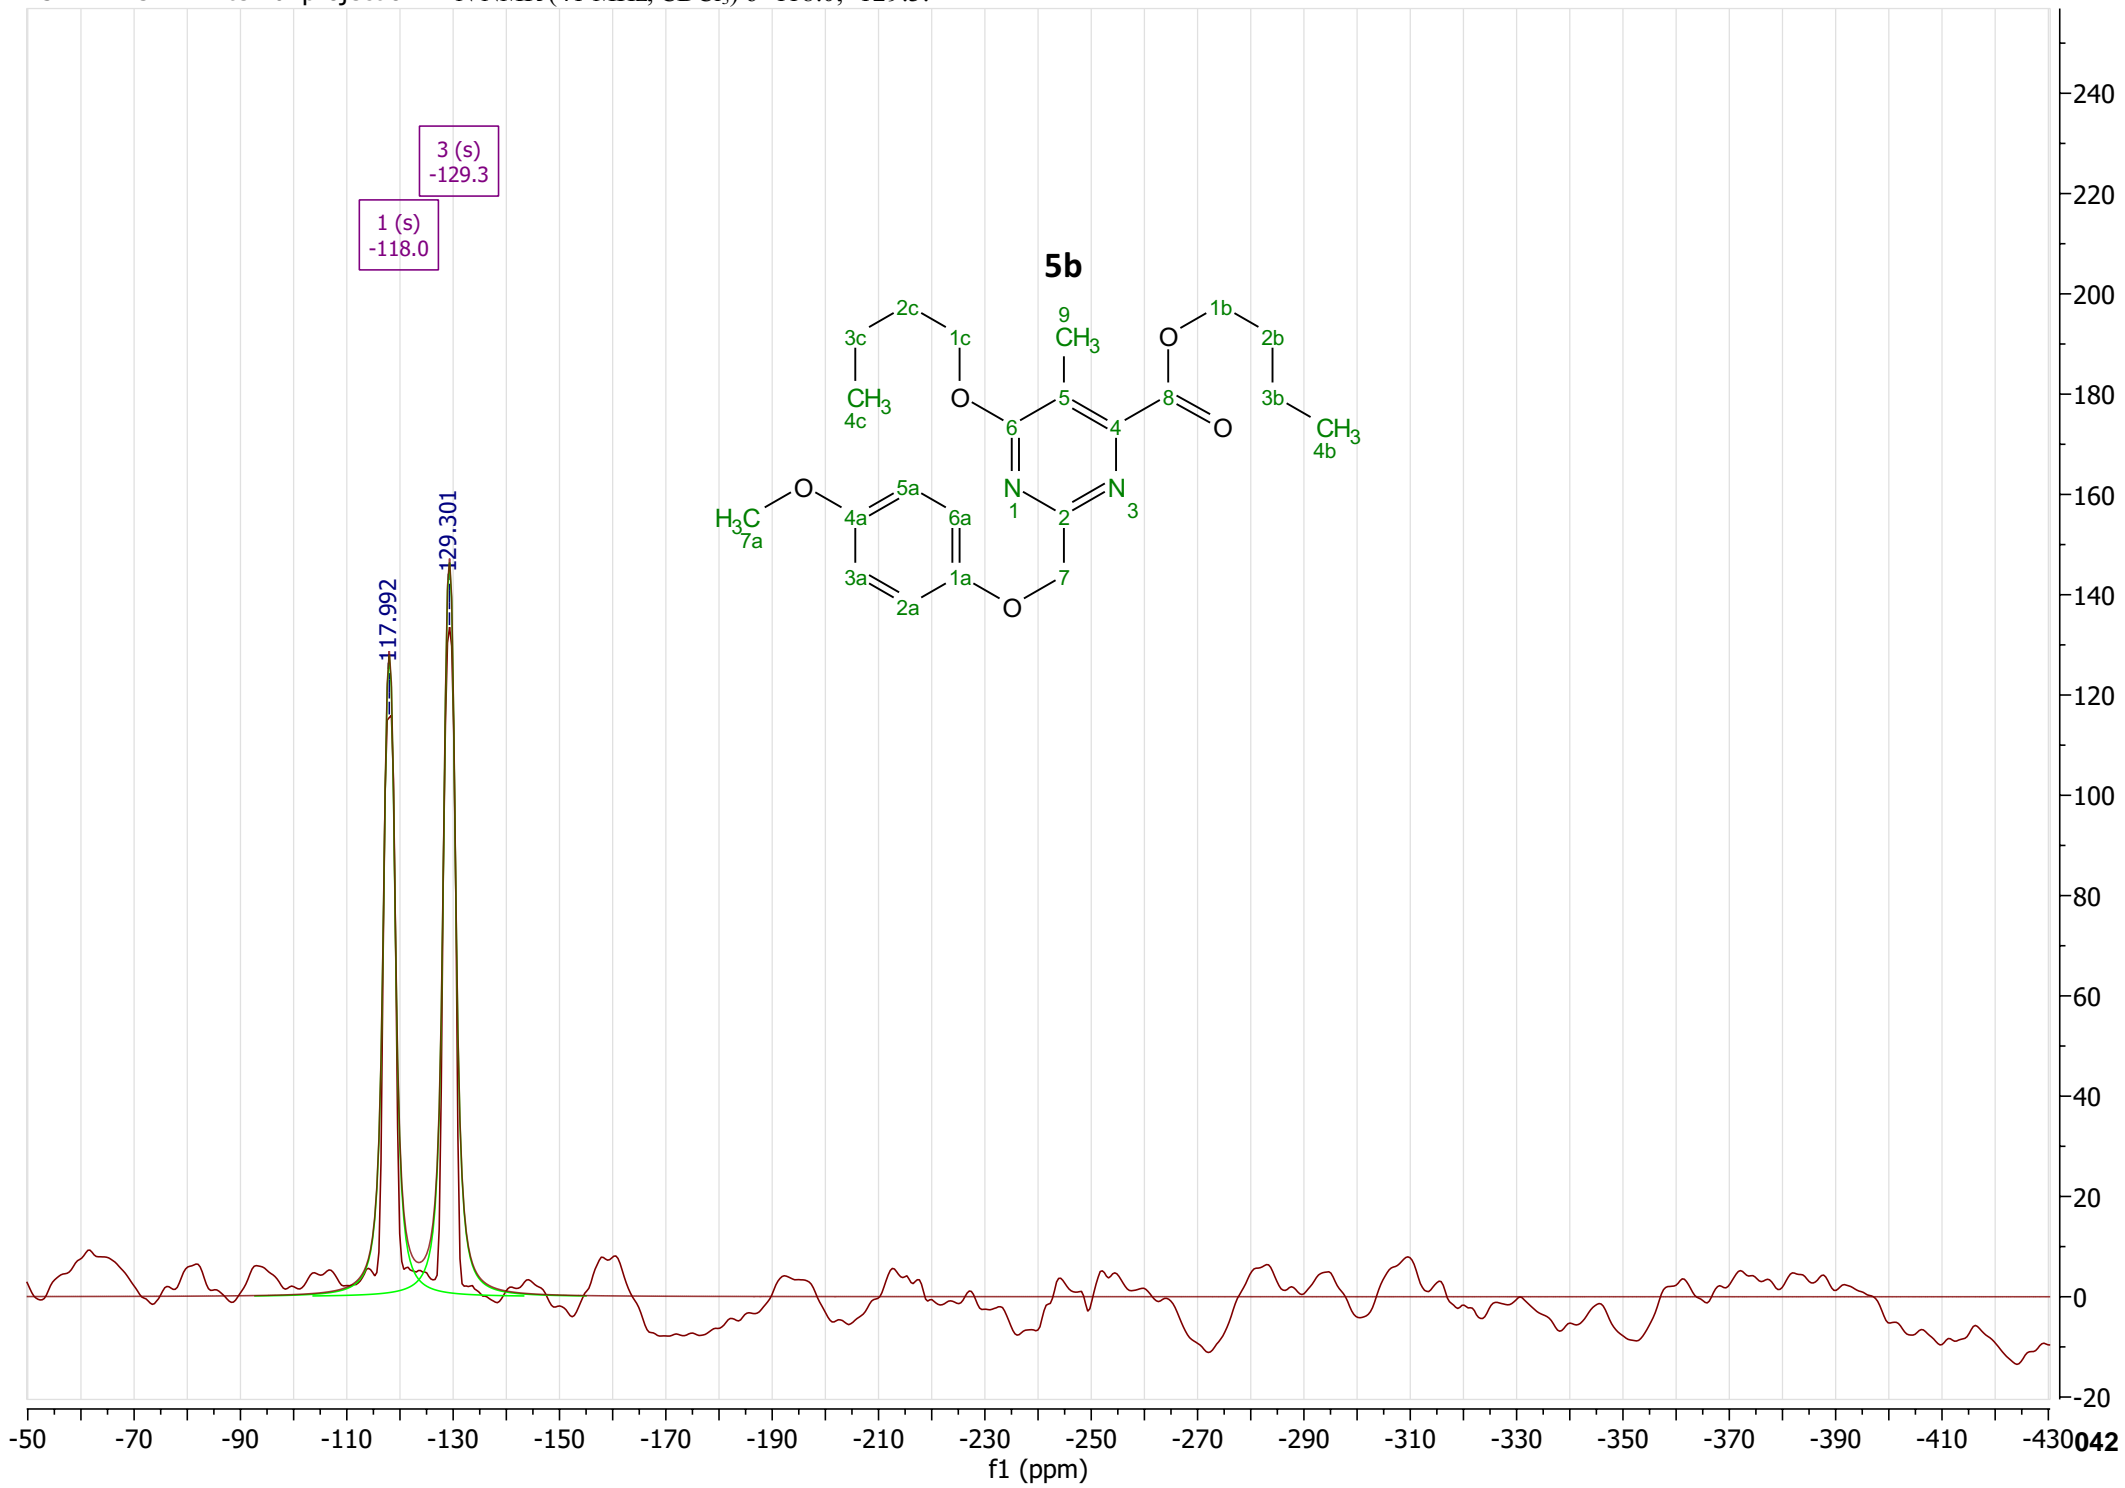

$^1\text{H}$  NMR (400 MHz,  $\text{CDCl}_3$ )  $\delta$  6.99 – 6.86 (m, 2H), 6.86 – 6.70 (m, 2H), 5.13 (s, 2H), 4.37 (t,  $J = 6.9$  Hz, 2H), 4.35 (t,  $J = 6.6$  Hz, 2H), 3.75 (s, 3H), 2.26 (s, 3H), 1.83 – 1.73 (m, 2H), 1.77 – 1.66 (m, 2H), 1.49 – 1.20 (m, 16H), 0.89 (app t,  $J = 6.9$  Hz, 3H), 0.88 (app t,  $J = 6.9$  Hz, 3H).

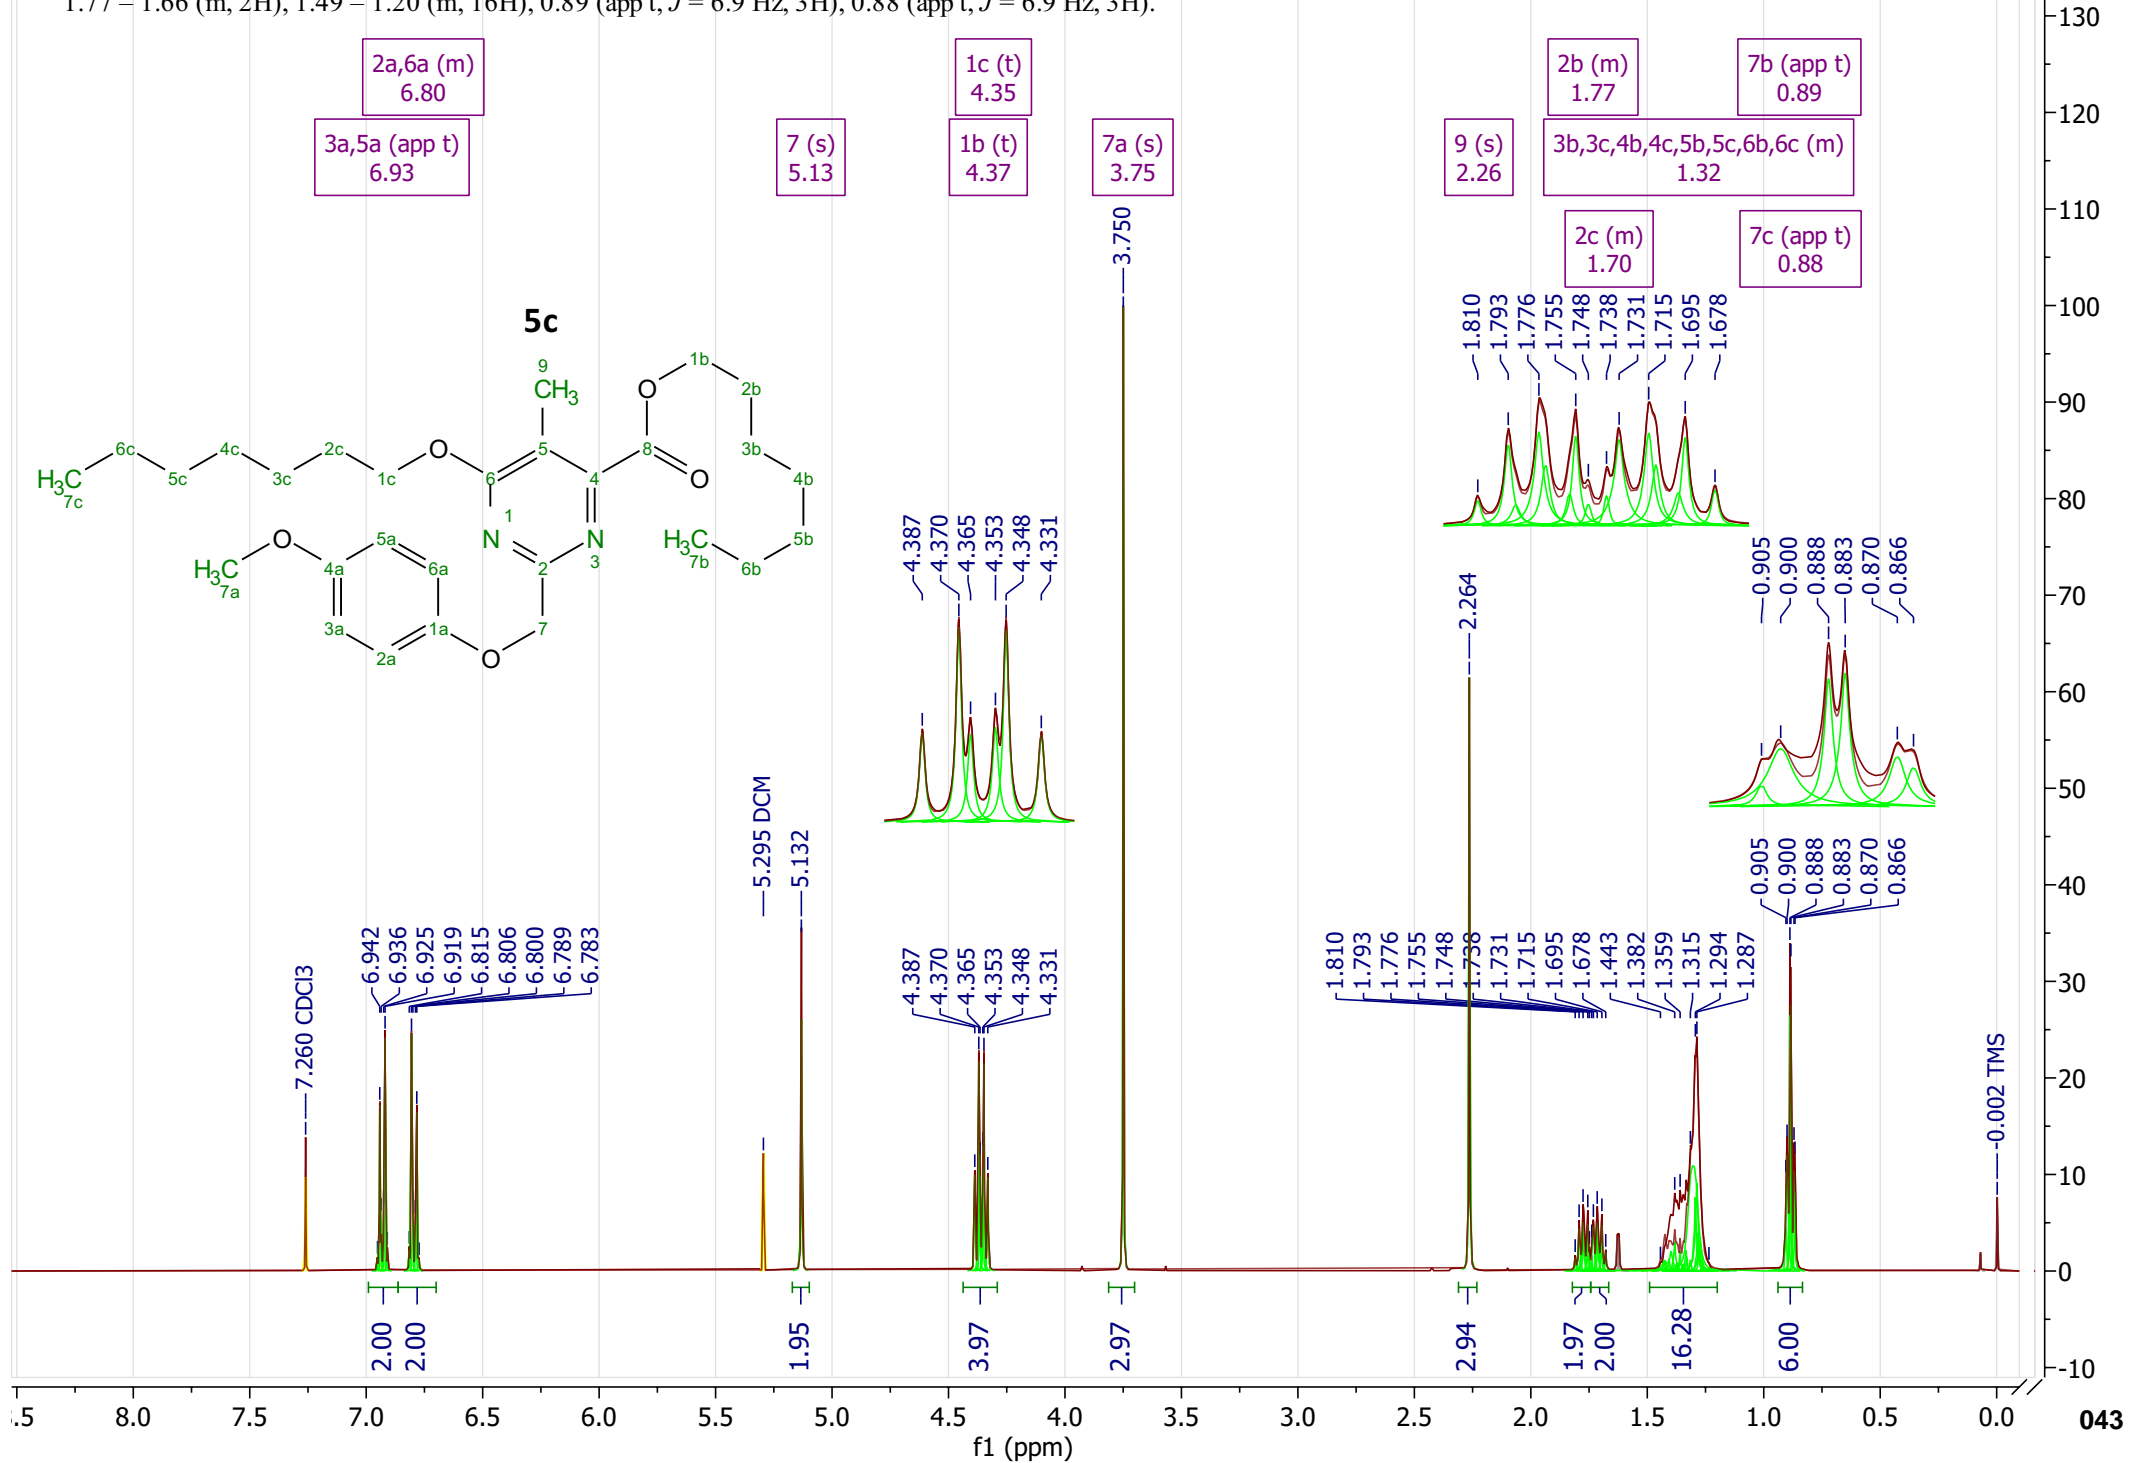

13C <sup>13</sup>C NMR (101 MHz, CDCl<sub>3</sub>) δ 169.3, 165.9, 163.1, 155.1, 154.1, 153.0, 116.6 (sym, 2C), 116.1 (sym, 2C), 114.6, 71.2, 67.7, 66.4, 55.8, 31.9, 31.8, 29.1, 29.0, 28.74, 28.67, 26.03, 25.98, 22.73, 22.70, 14.21, 14.19, 11.1.

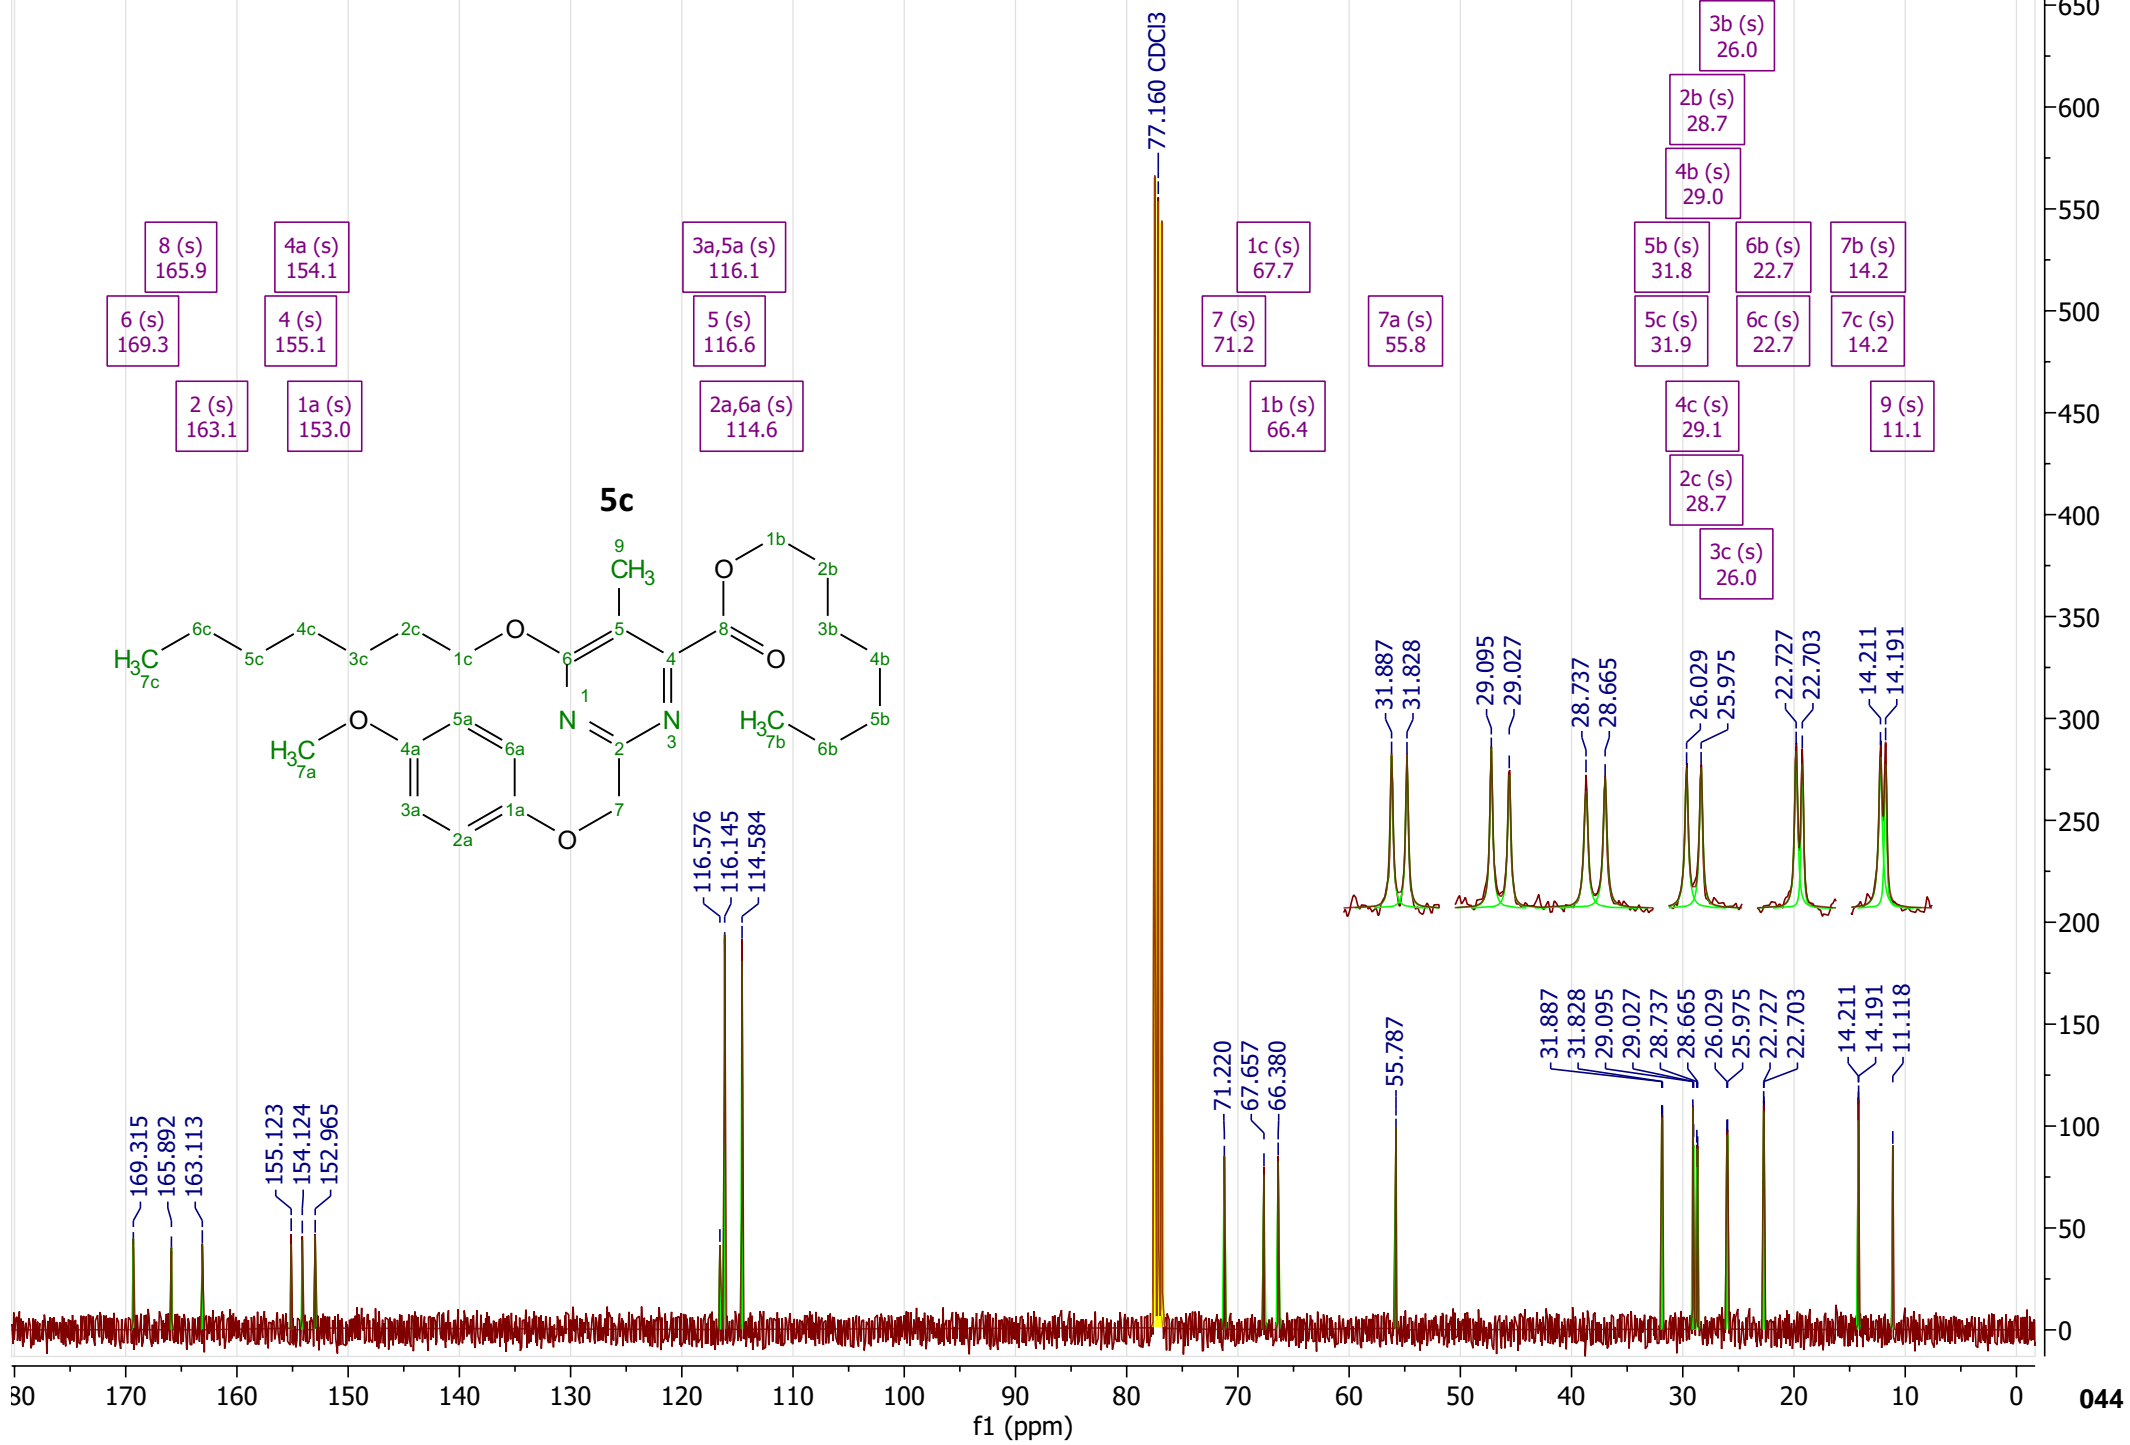

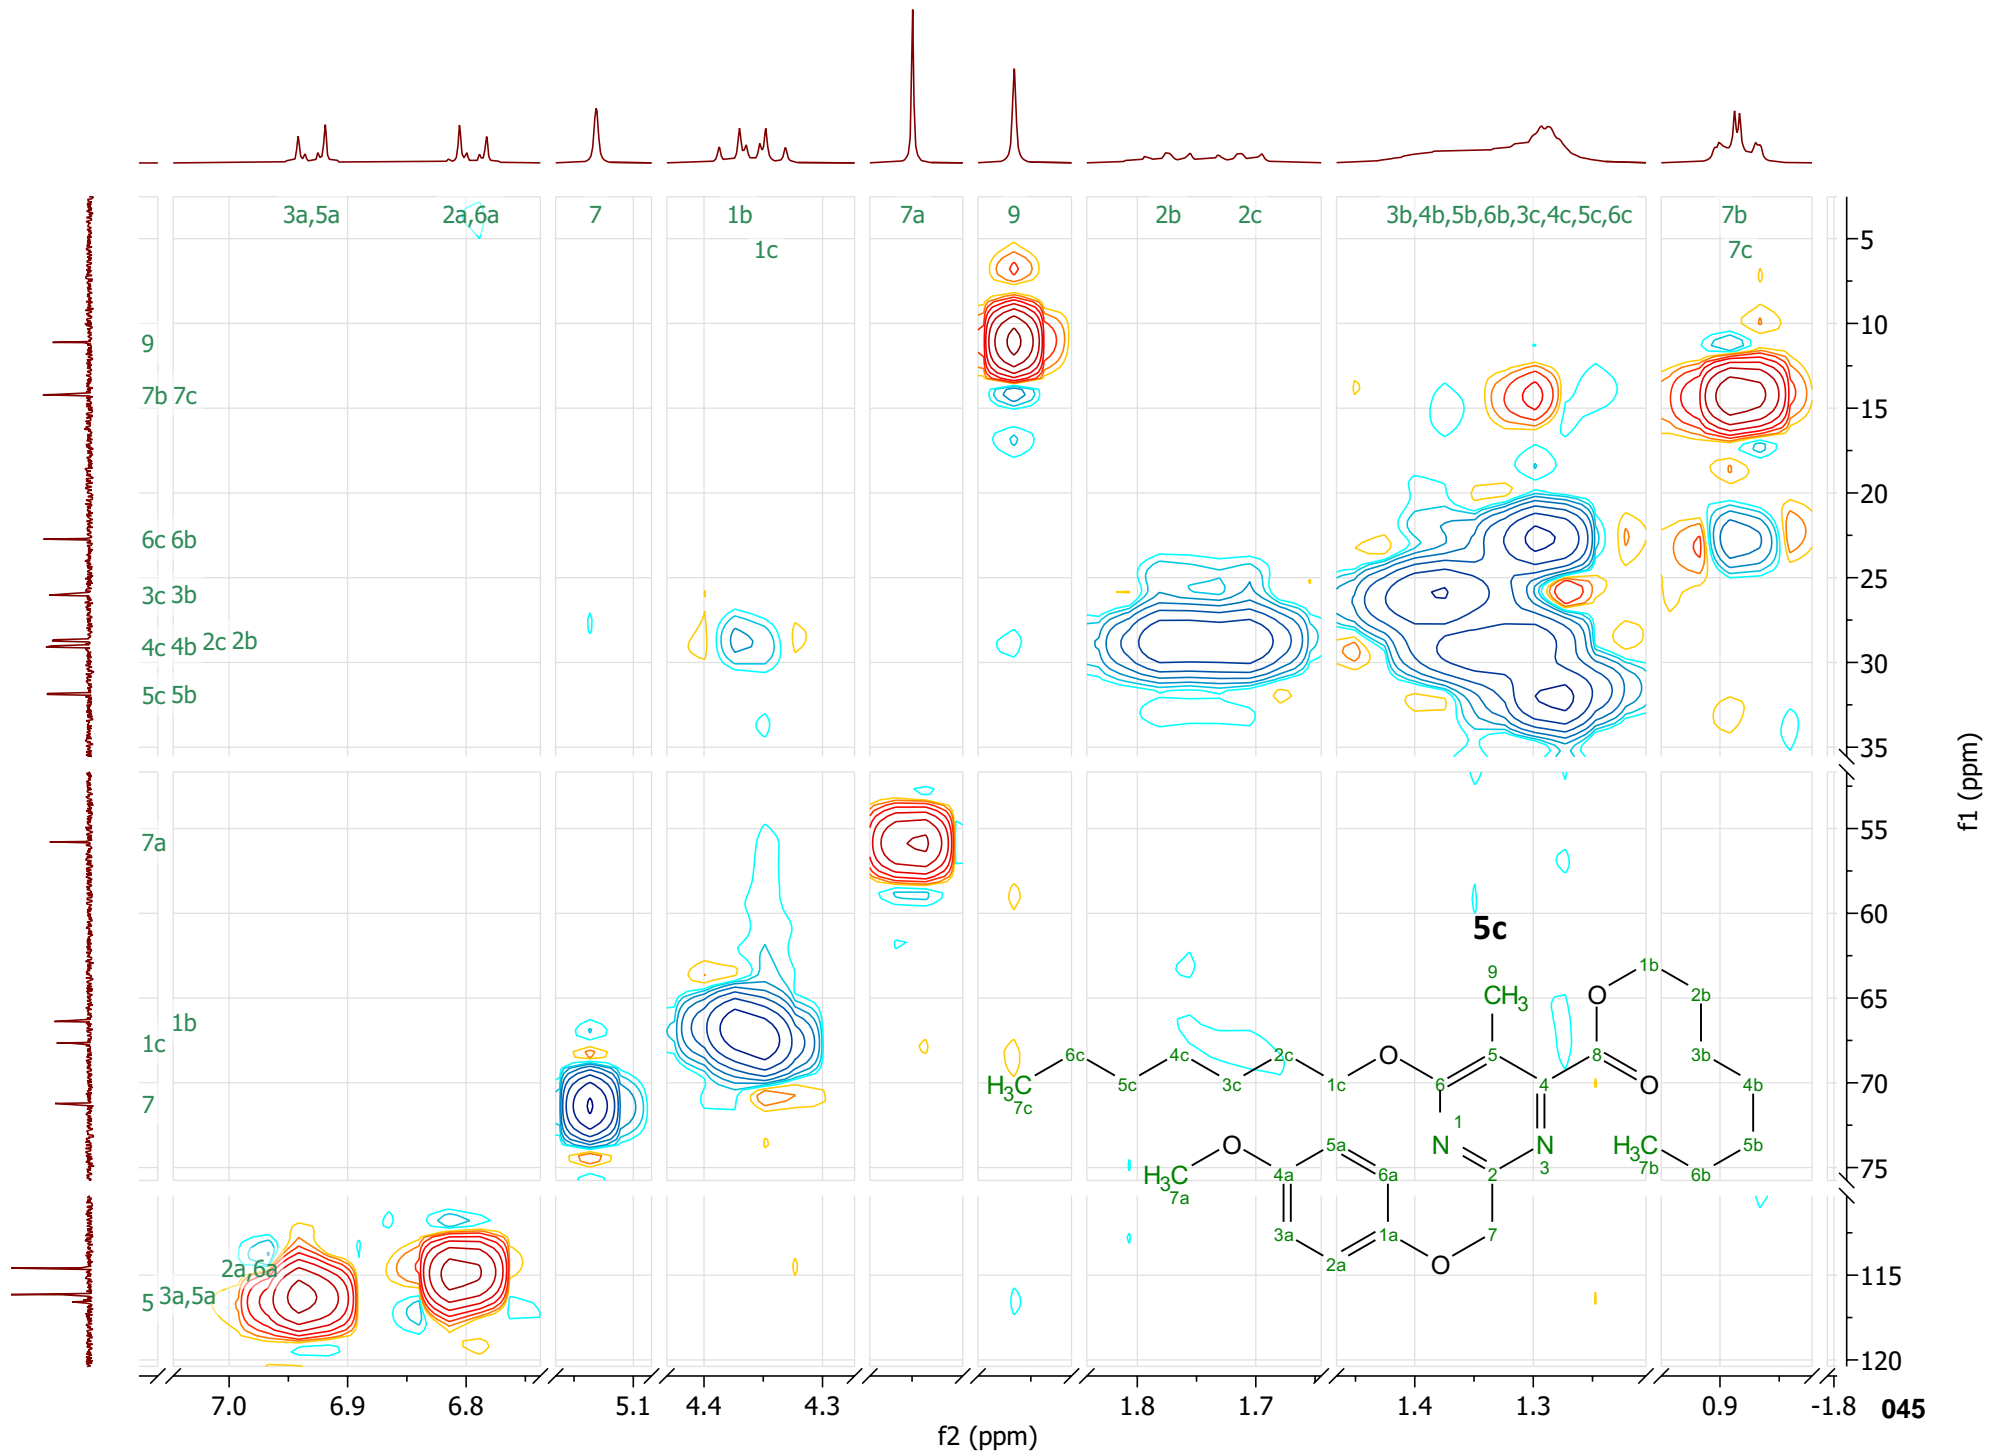



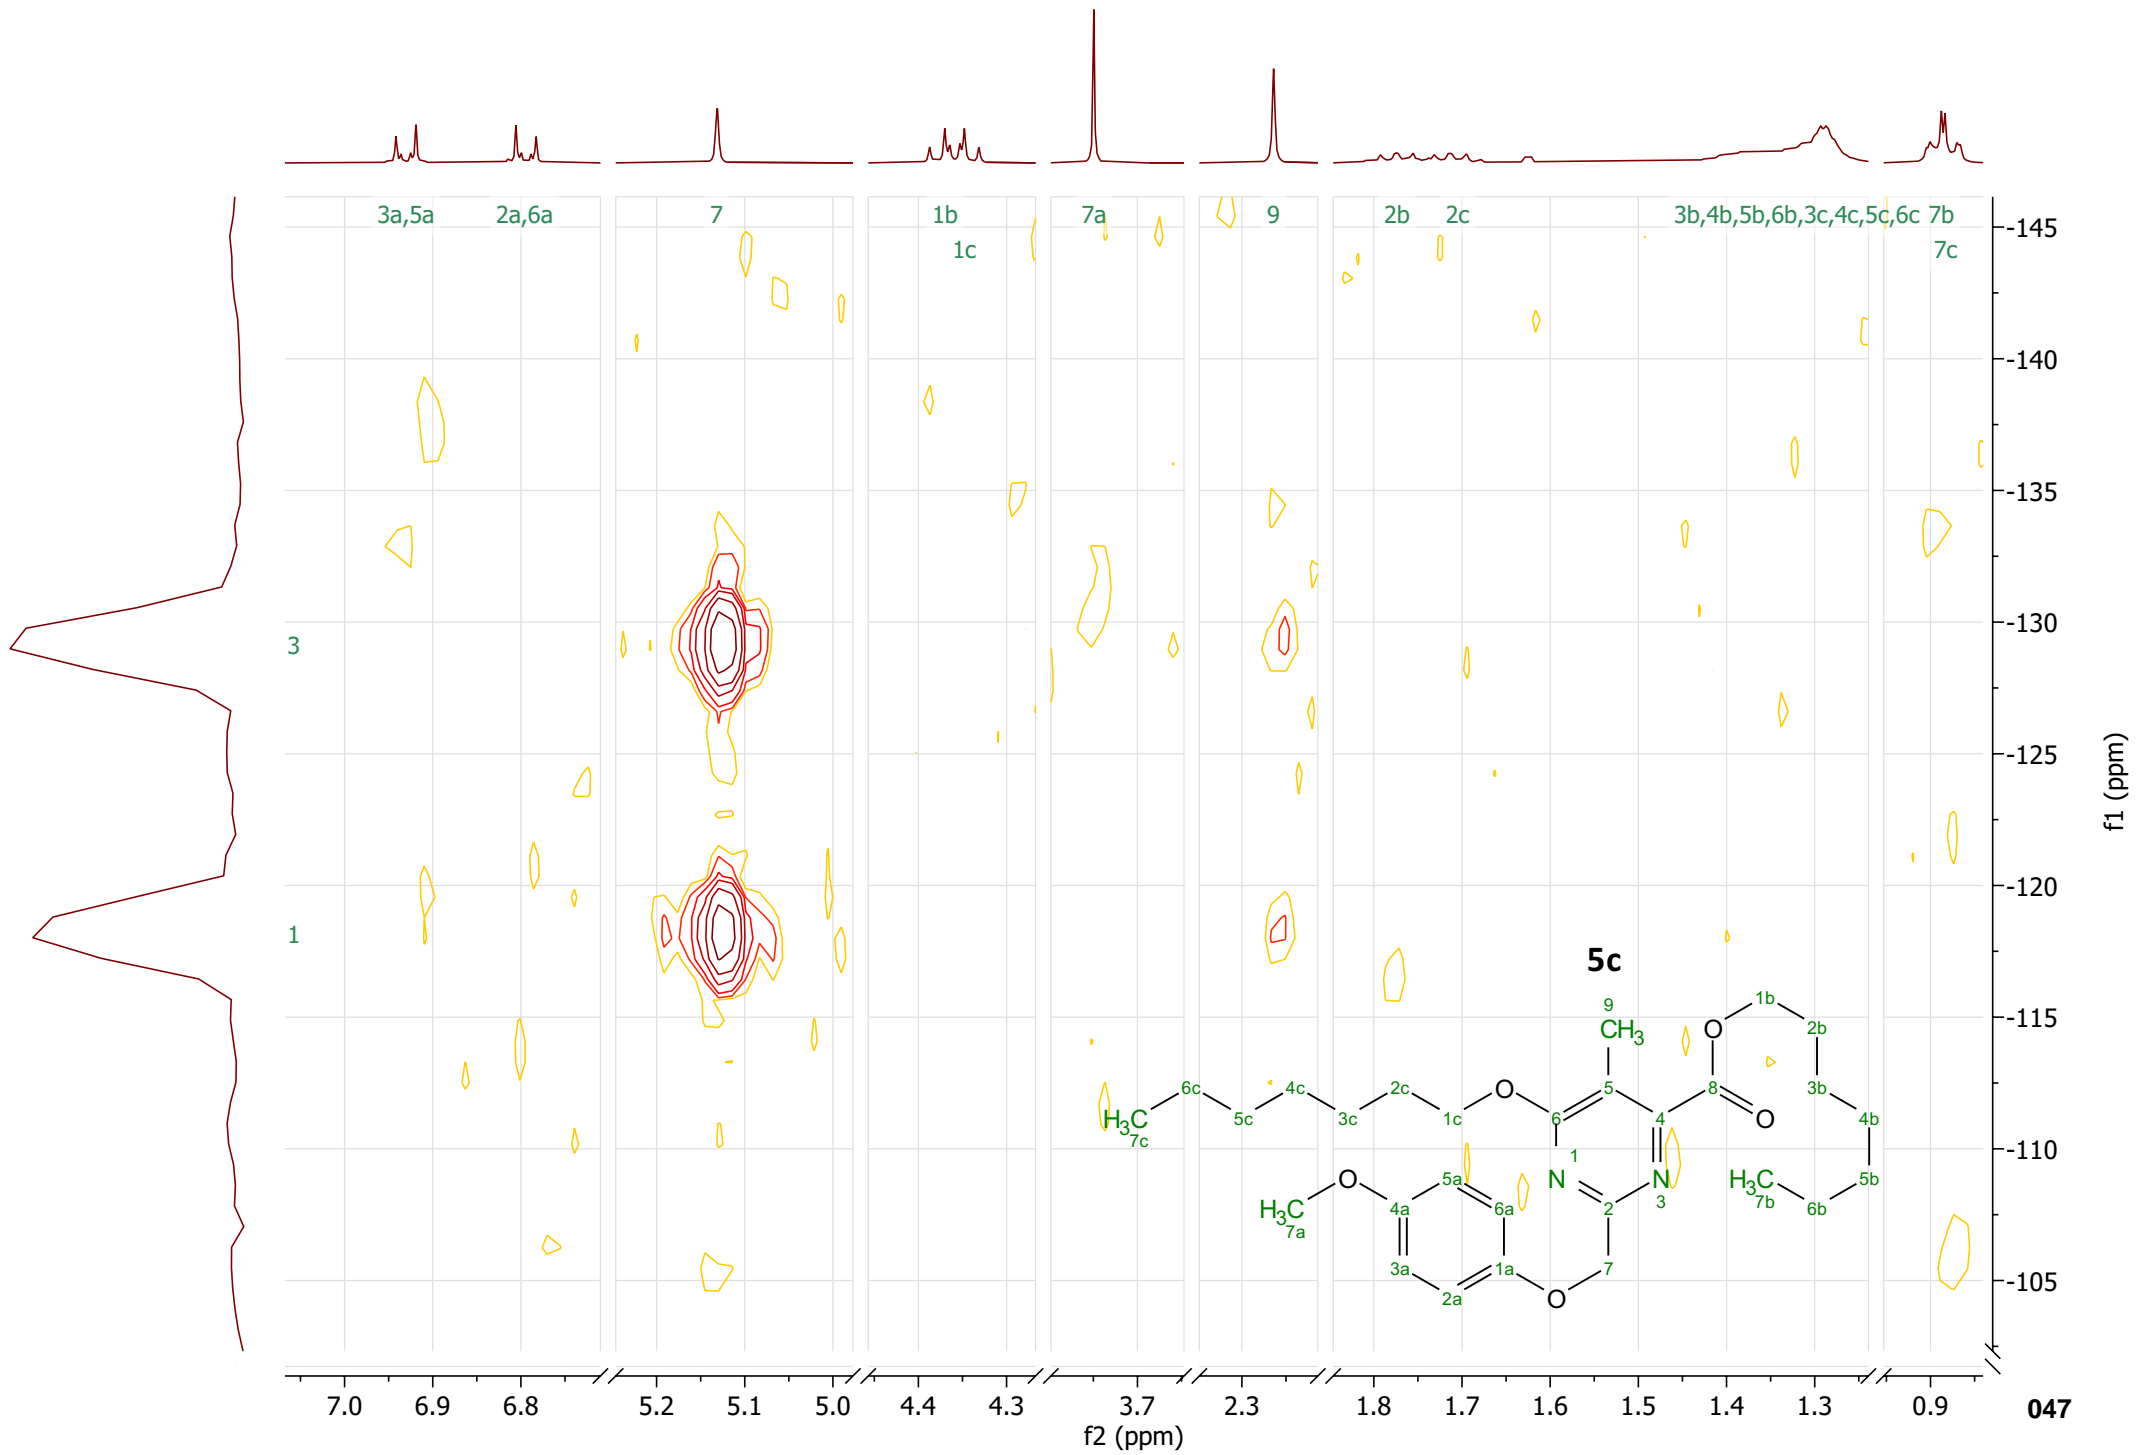

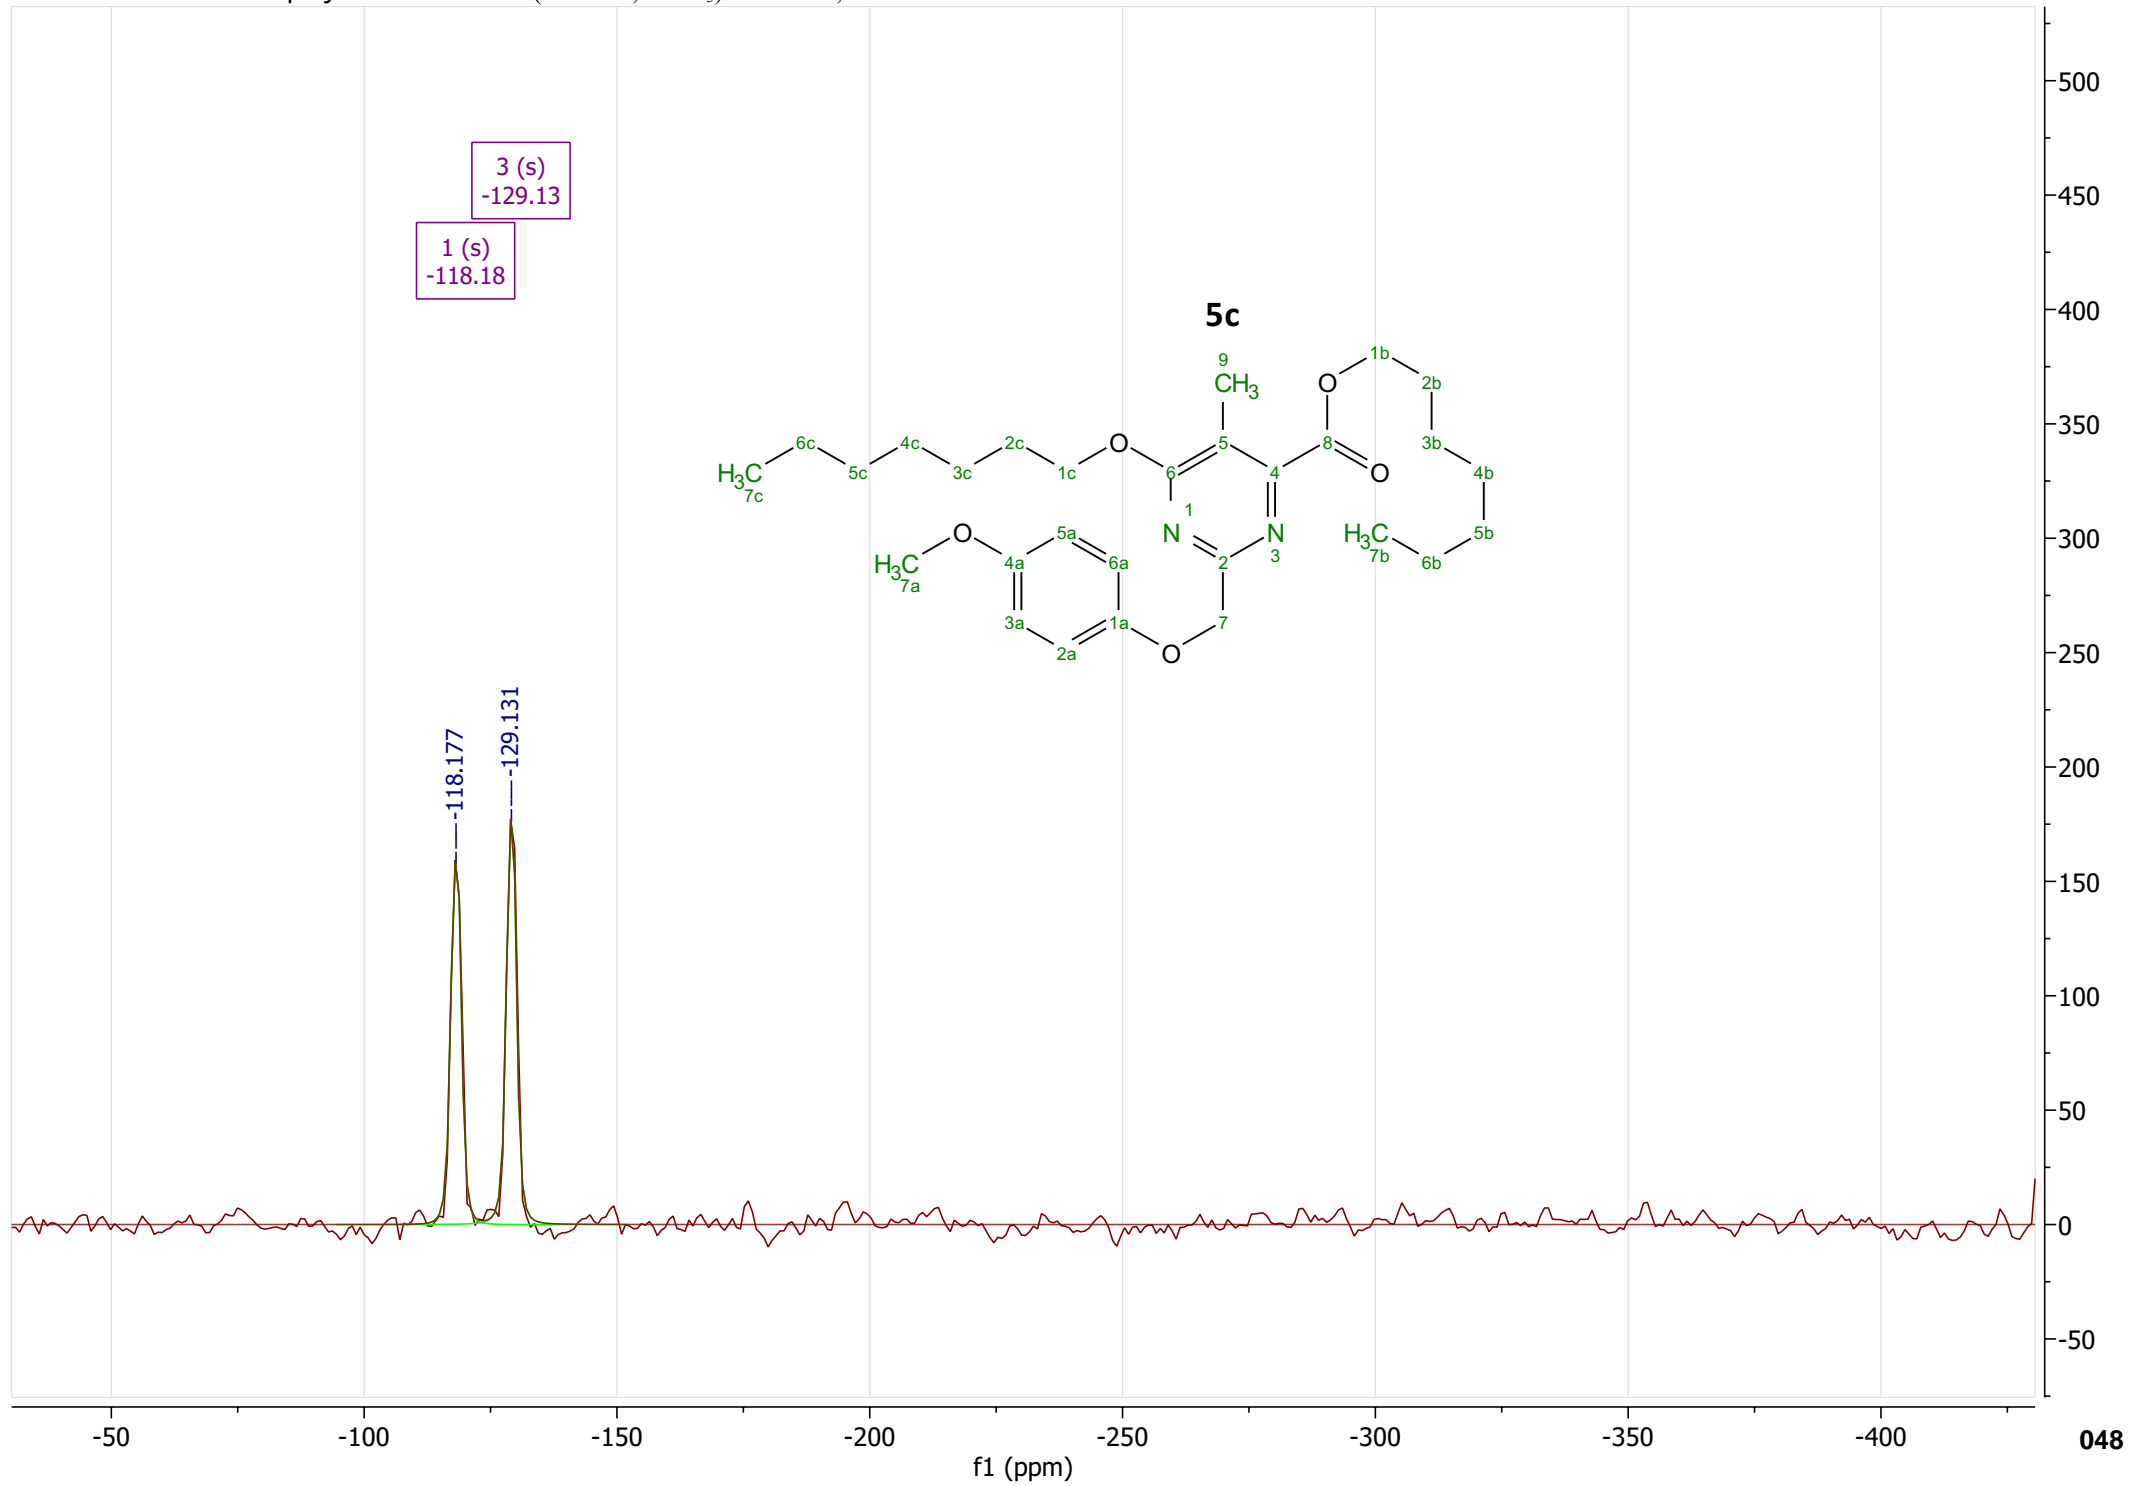



$^1\text{H}$  NMR (400 MHz,  $\text{CDCl}_3$ )  $\delta$  7.03 – 6.87 (m, 2H), 6.87 – 6.70 (m, 2H), 5.13 (s, 2H), 4.37 (t,  $J = 6.9$  Hz, 2H), 4.35 (t,  $J = 6.7$  Hz, 2H), 3.75 (s, 3H), 2.26 (s, 3H), 1.83 – 1.73 (m, 2H), 1.75 – 1.64 (m, 2H), 1.48 – 1.35 (m, 4H), 1.35 – 1.16 (m, 16H), 0.883 (app t,  $J = 6.9$  Hz, 3H), 0.877 (t,  $J = 6.9$  Hz, 3H).

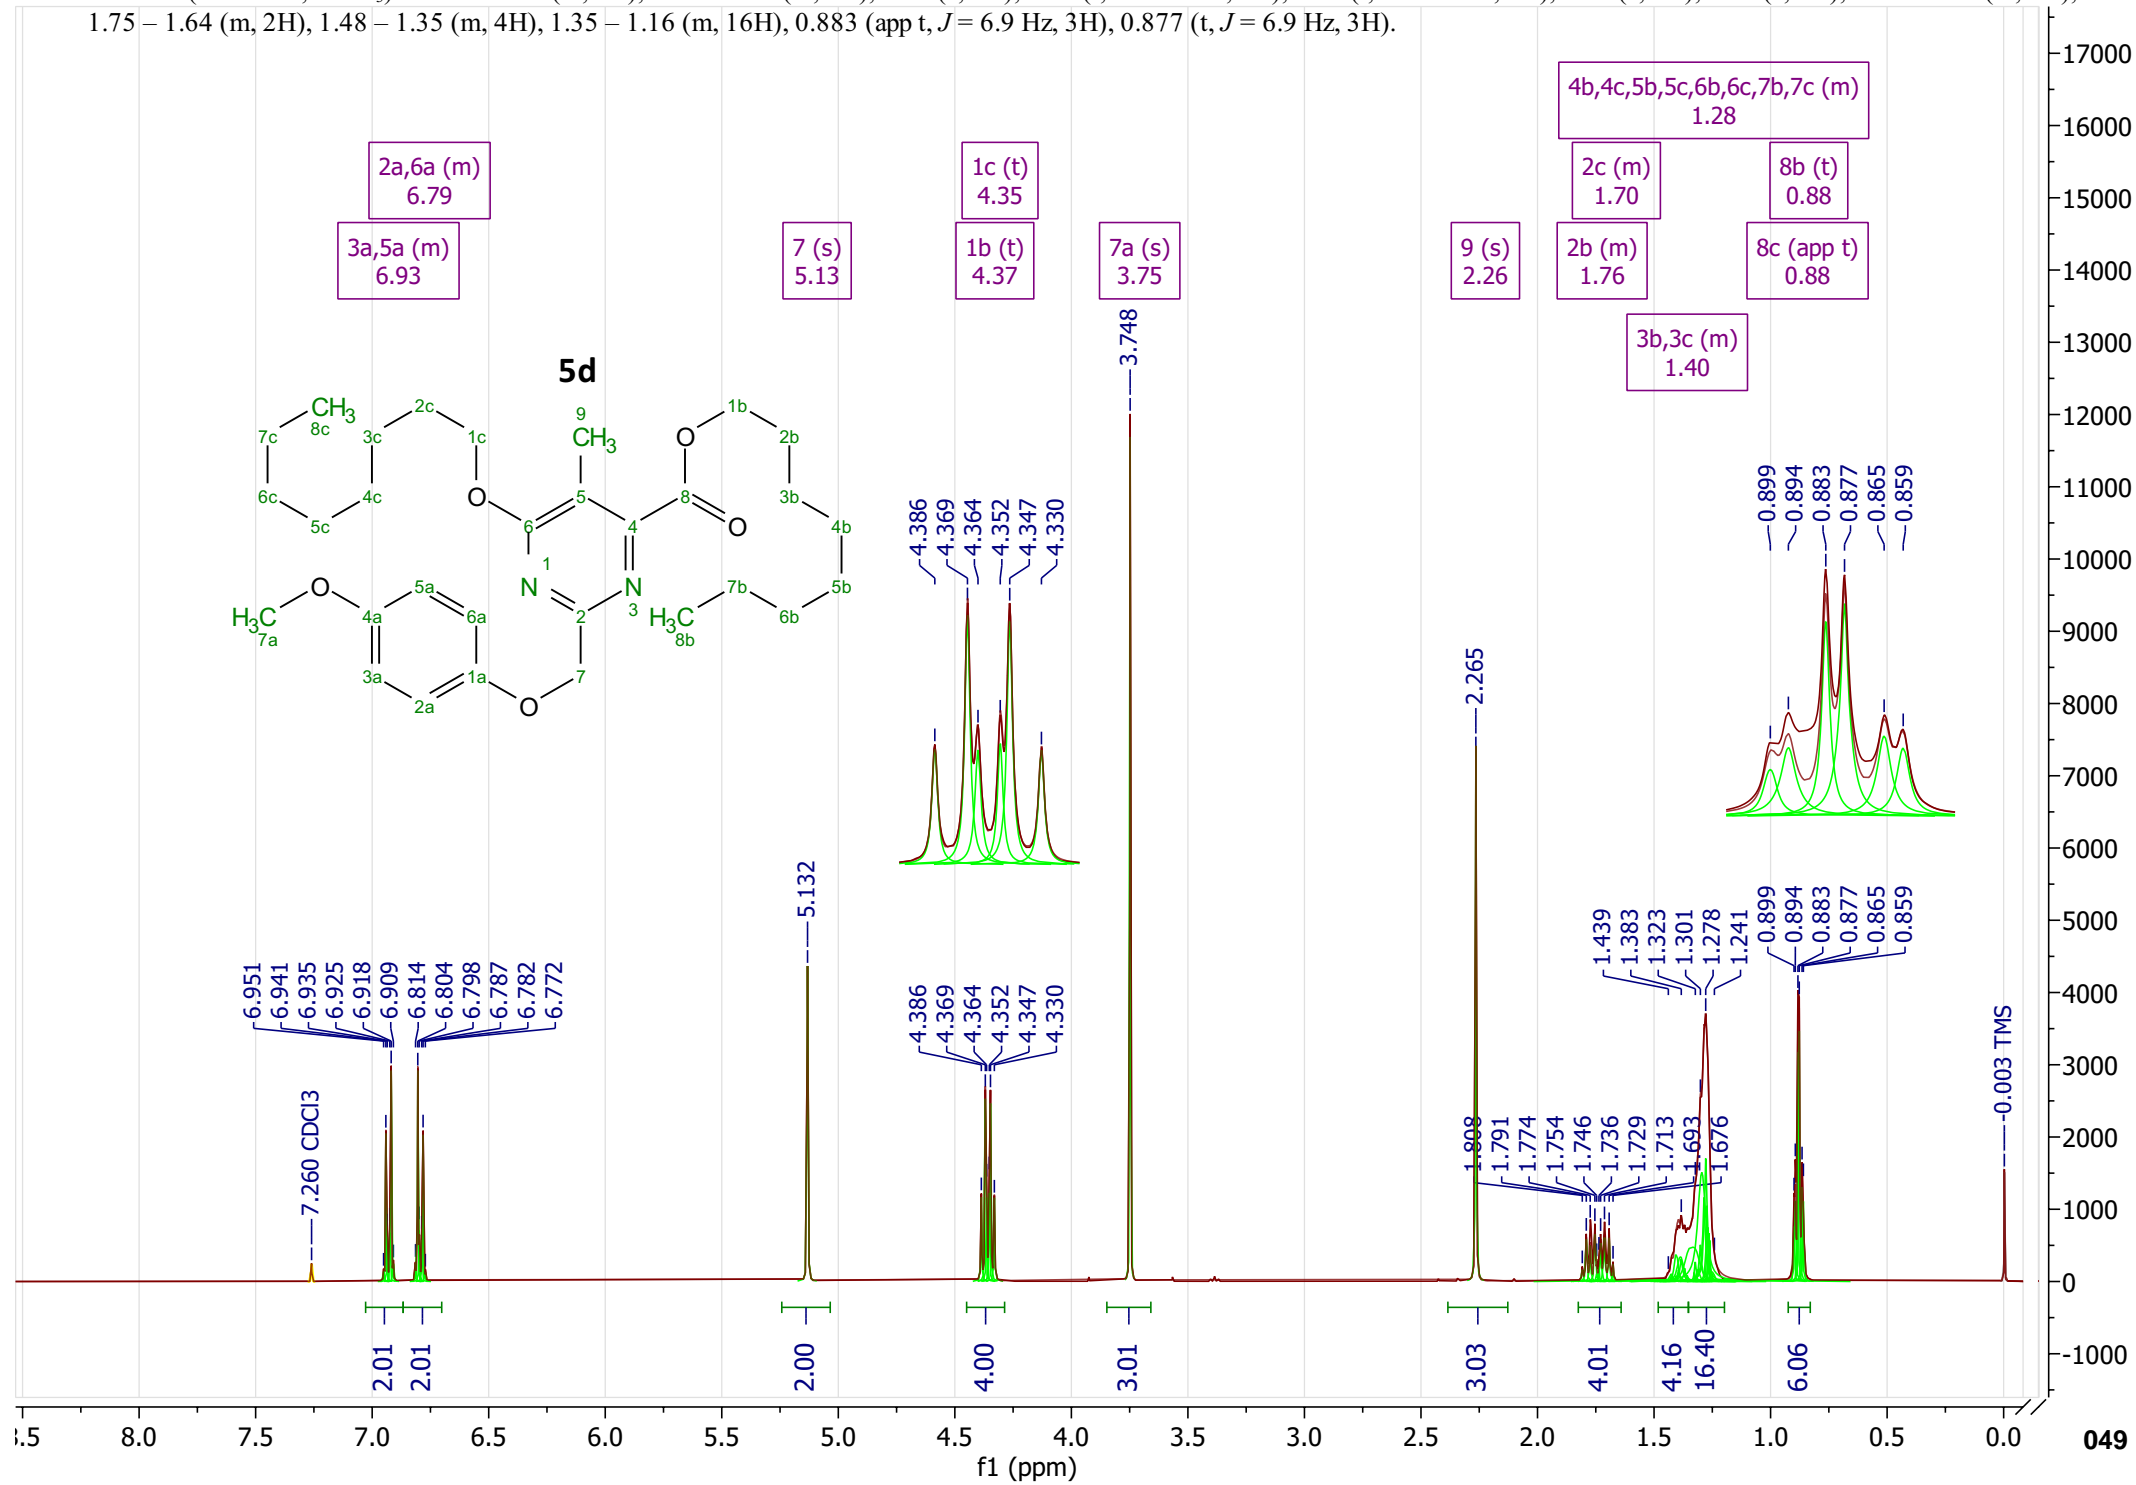

**13C** <sup>13</sup>C NMR (101 MHz, CDCl<sub>3</sub>) δ 169.3, 165.9, 163.1, 155.1, 154.1, 153.0, 116.6, 116.1 (sym, 2C), 114.6 (sym, 2C), 71.2, 67.7, 66.4, 55.8, 31.93, 31.89, 29.4, 29.34, 29.31, 29.28, 28.72, 28.66, 26.1, 26.0, 22.78, 22.76, 14.23, 14.21, 11.1.

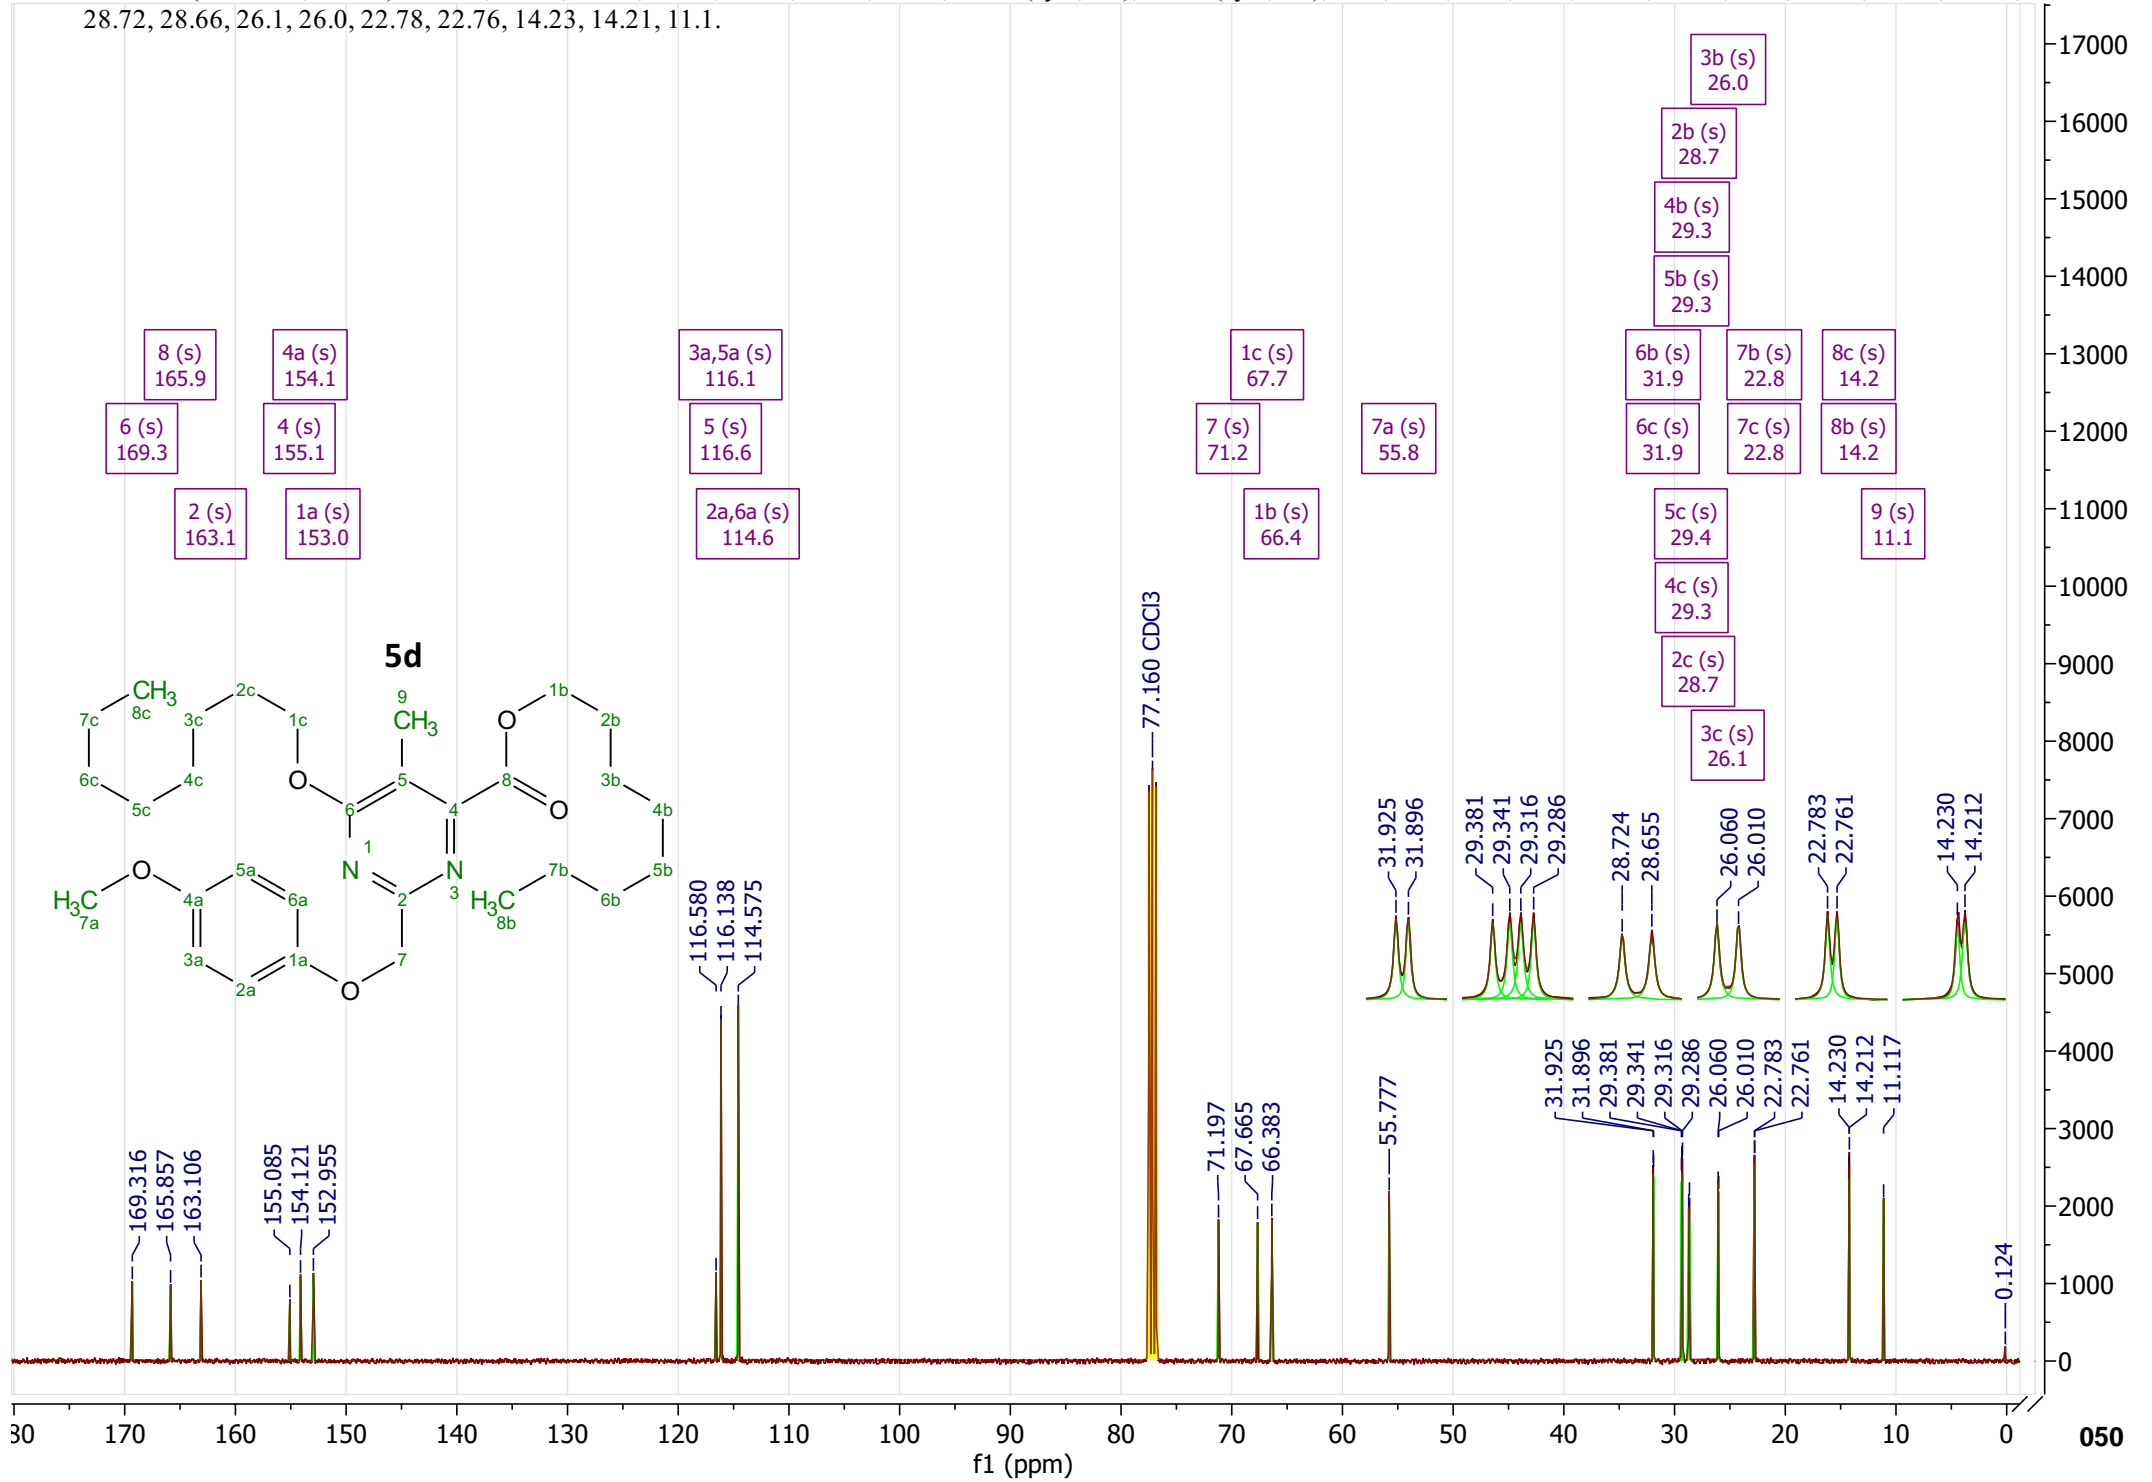

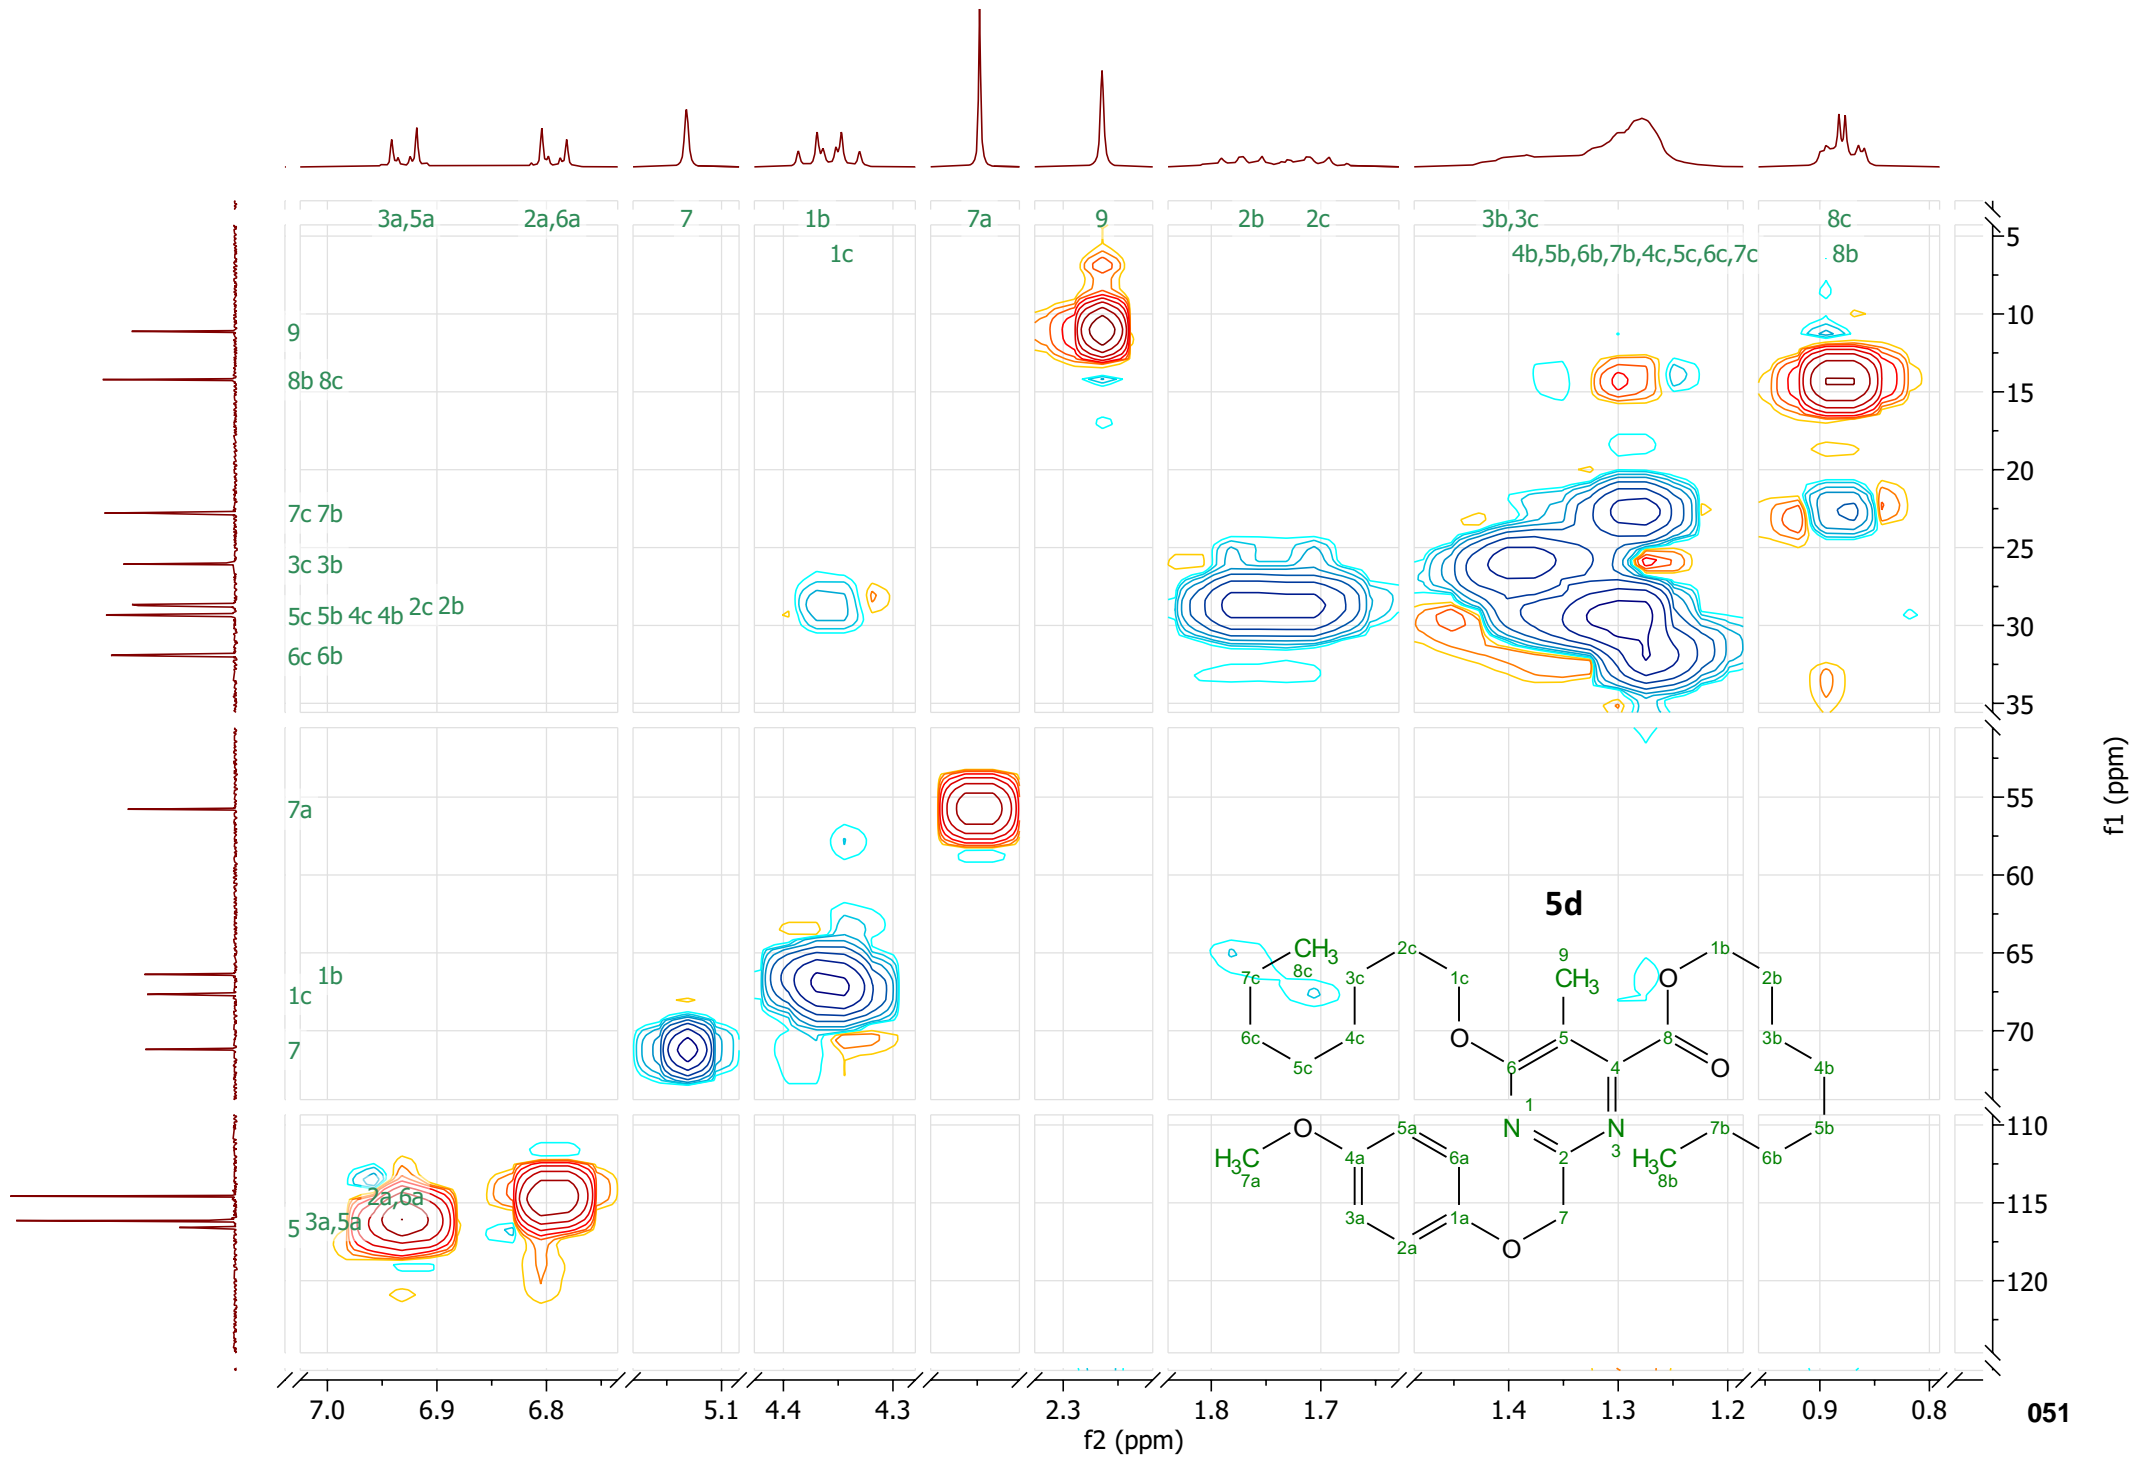

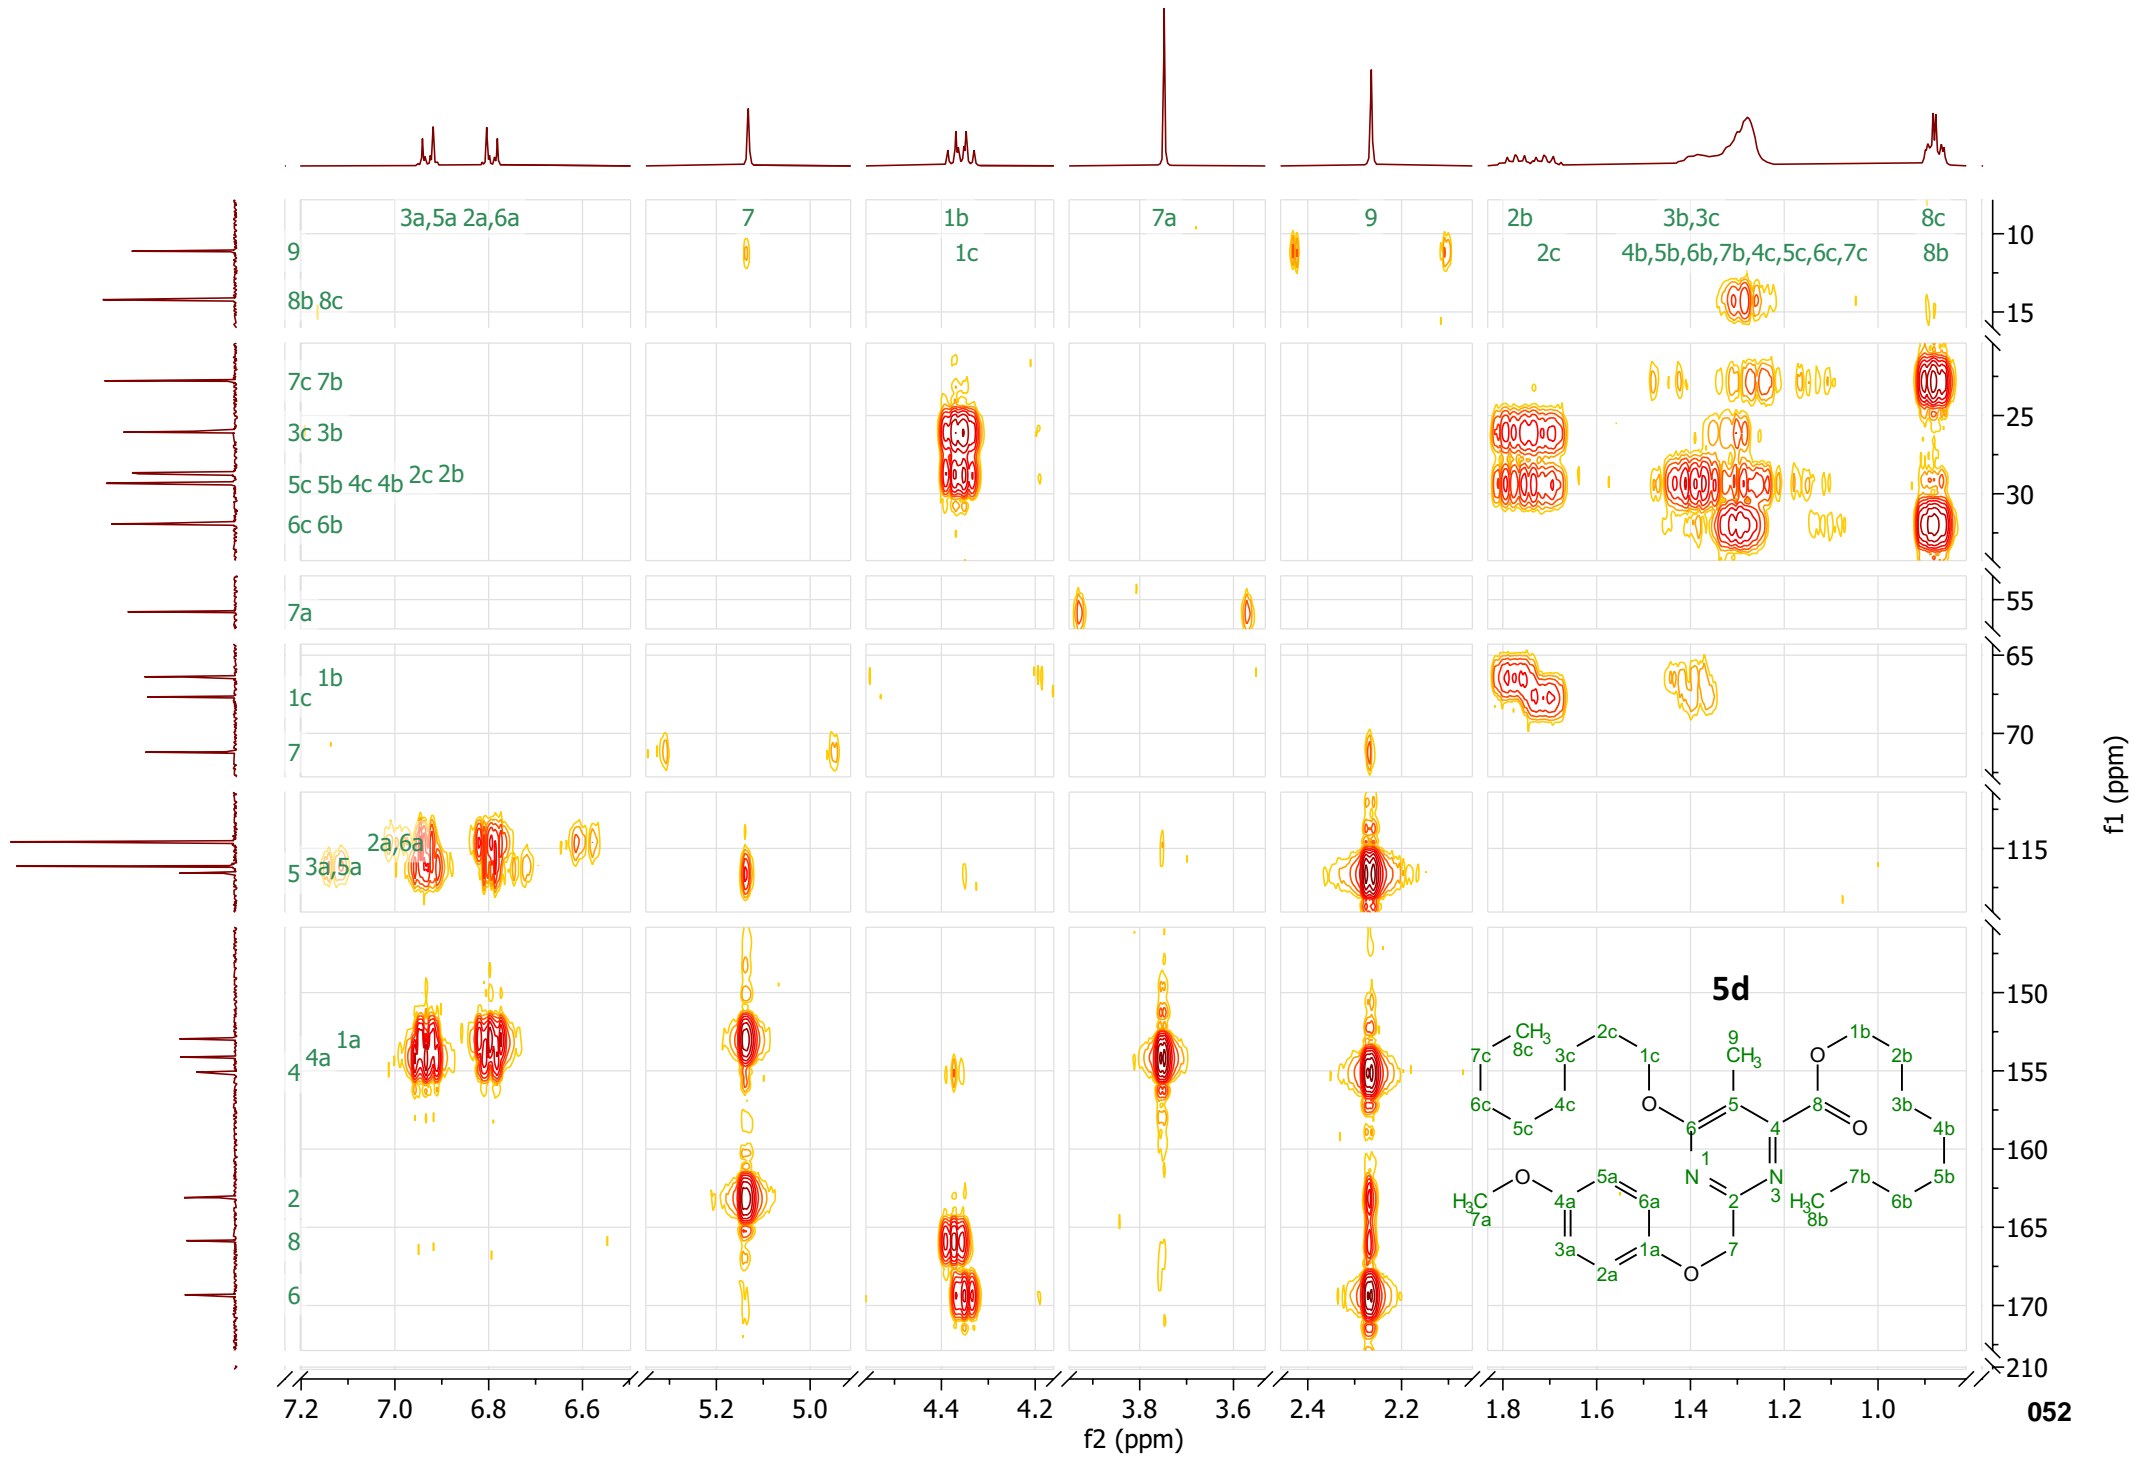

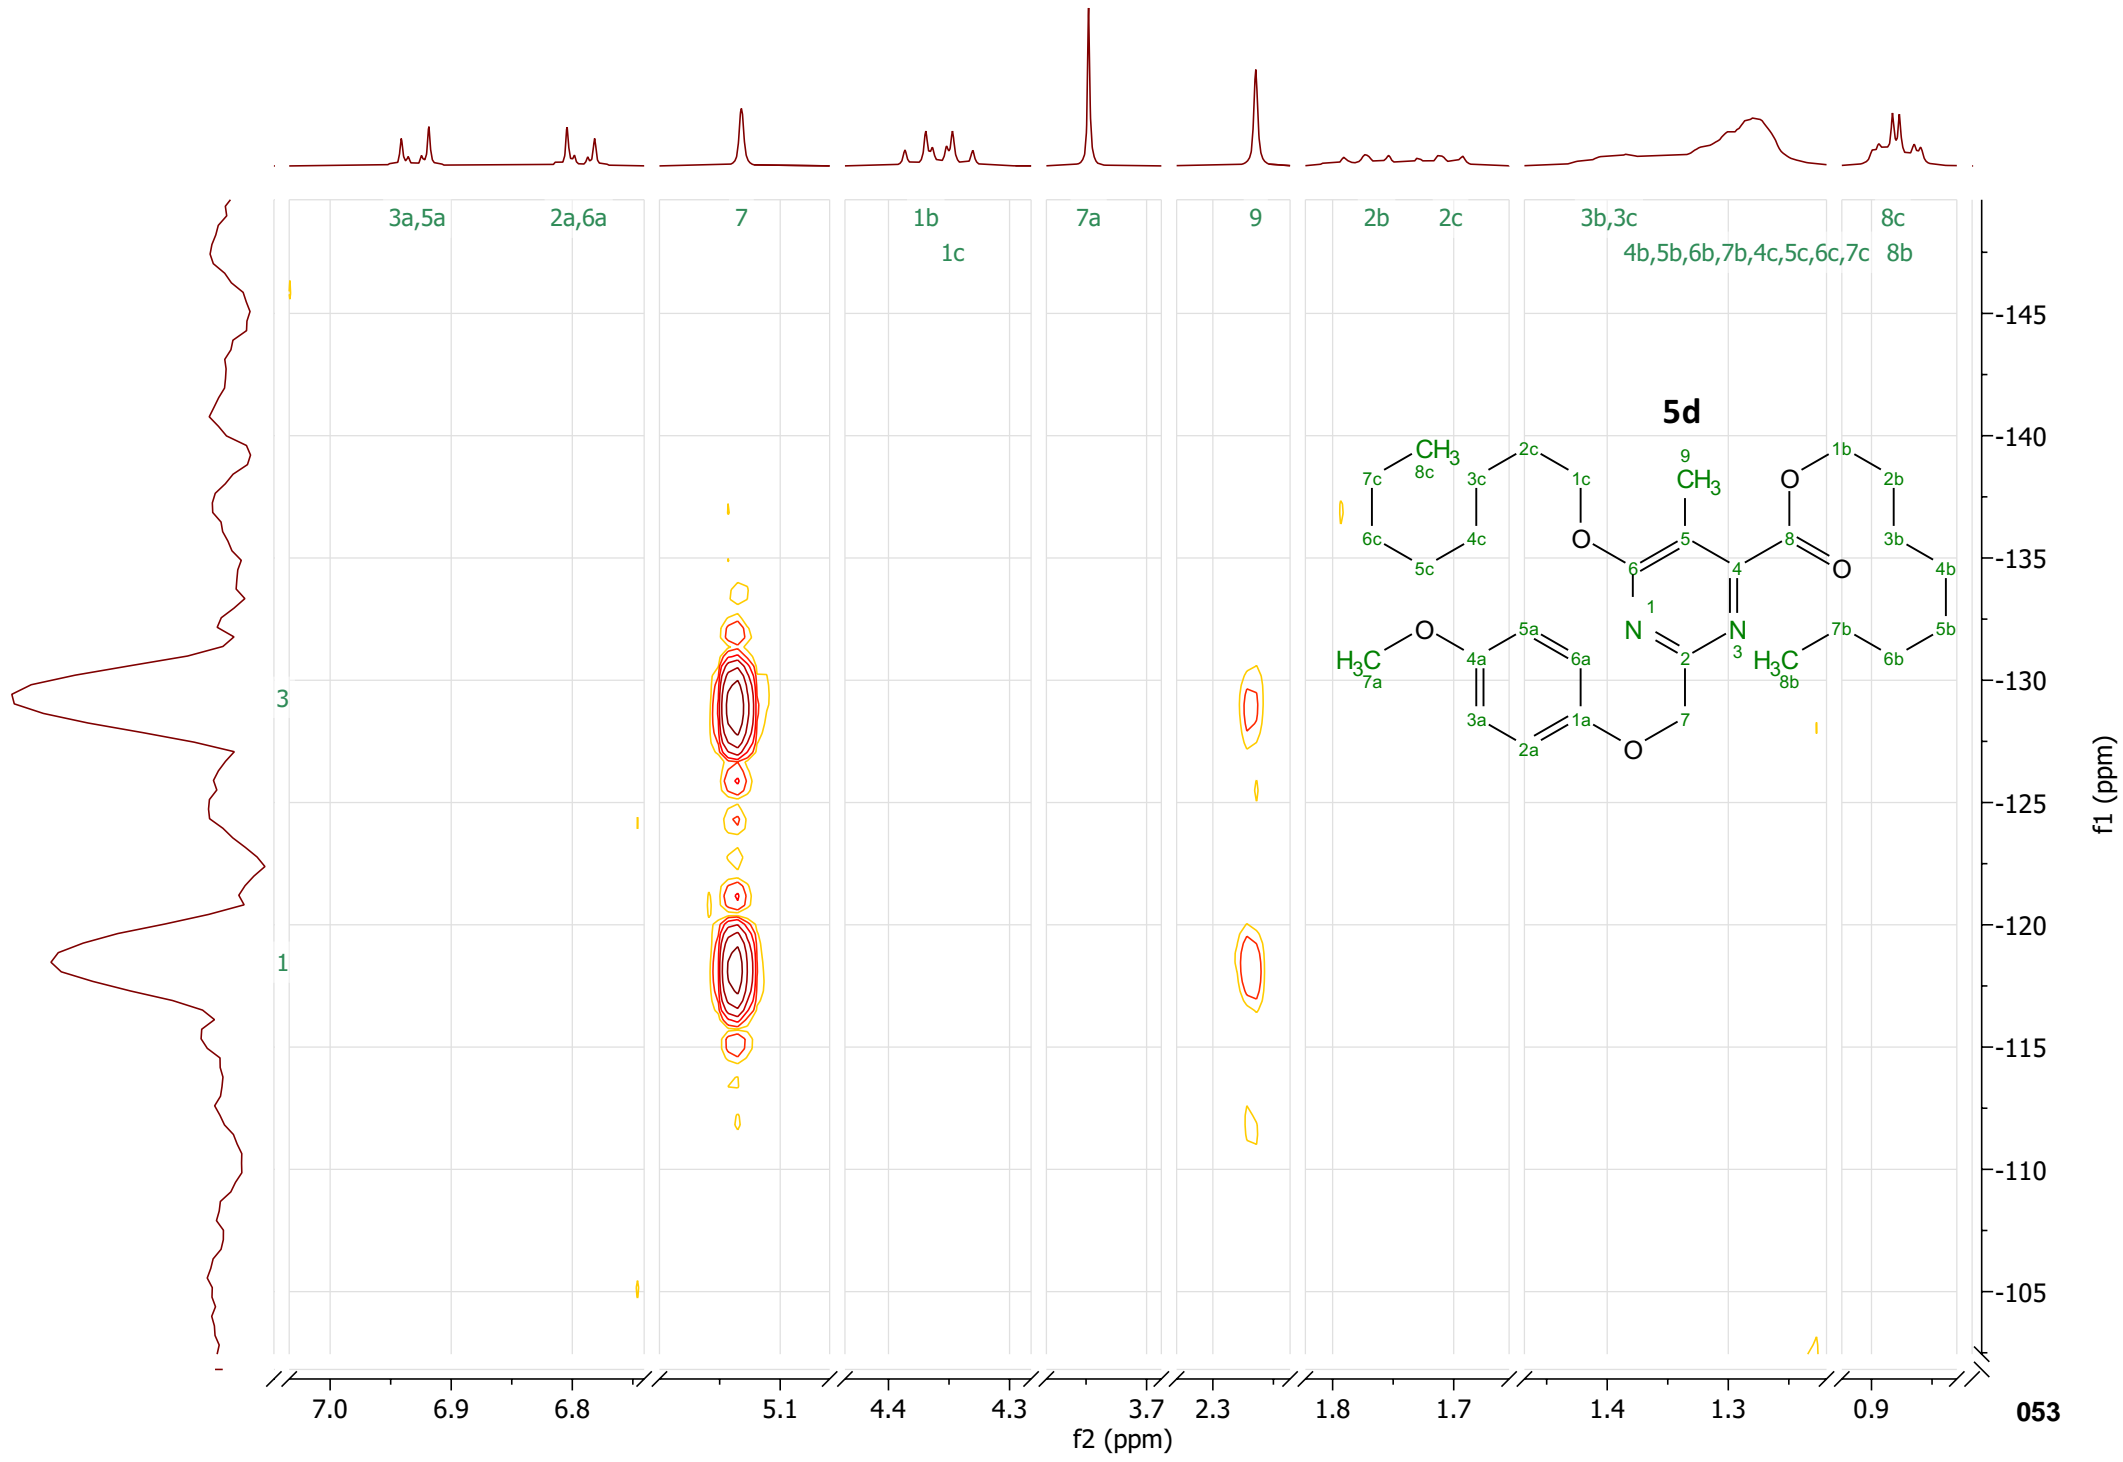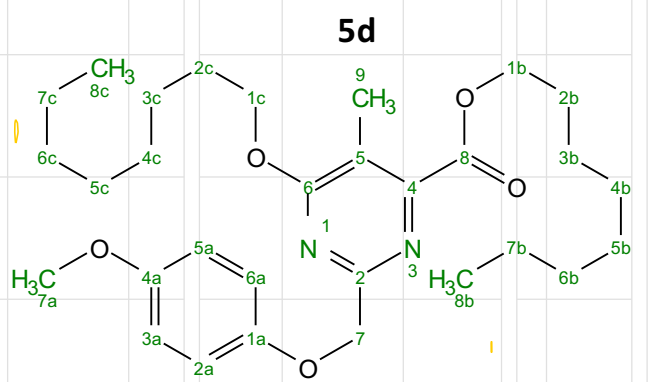

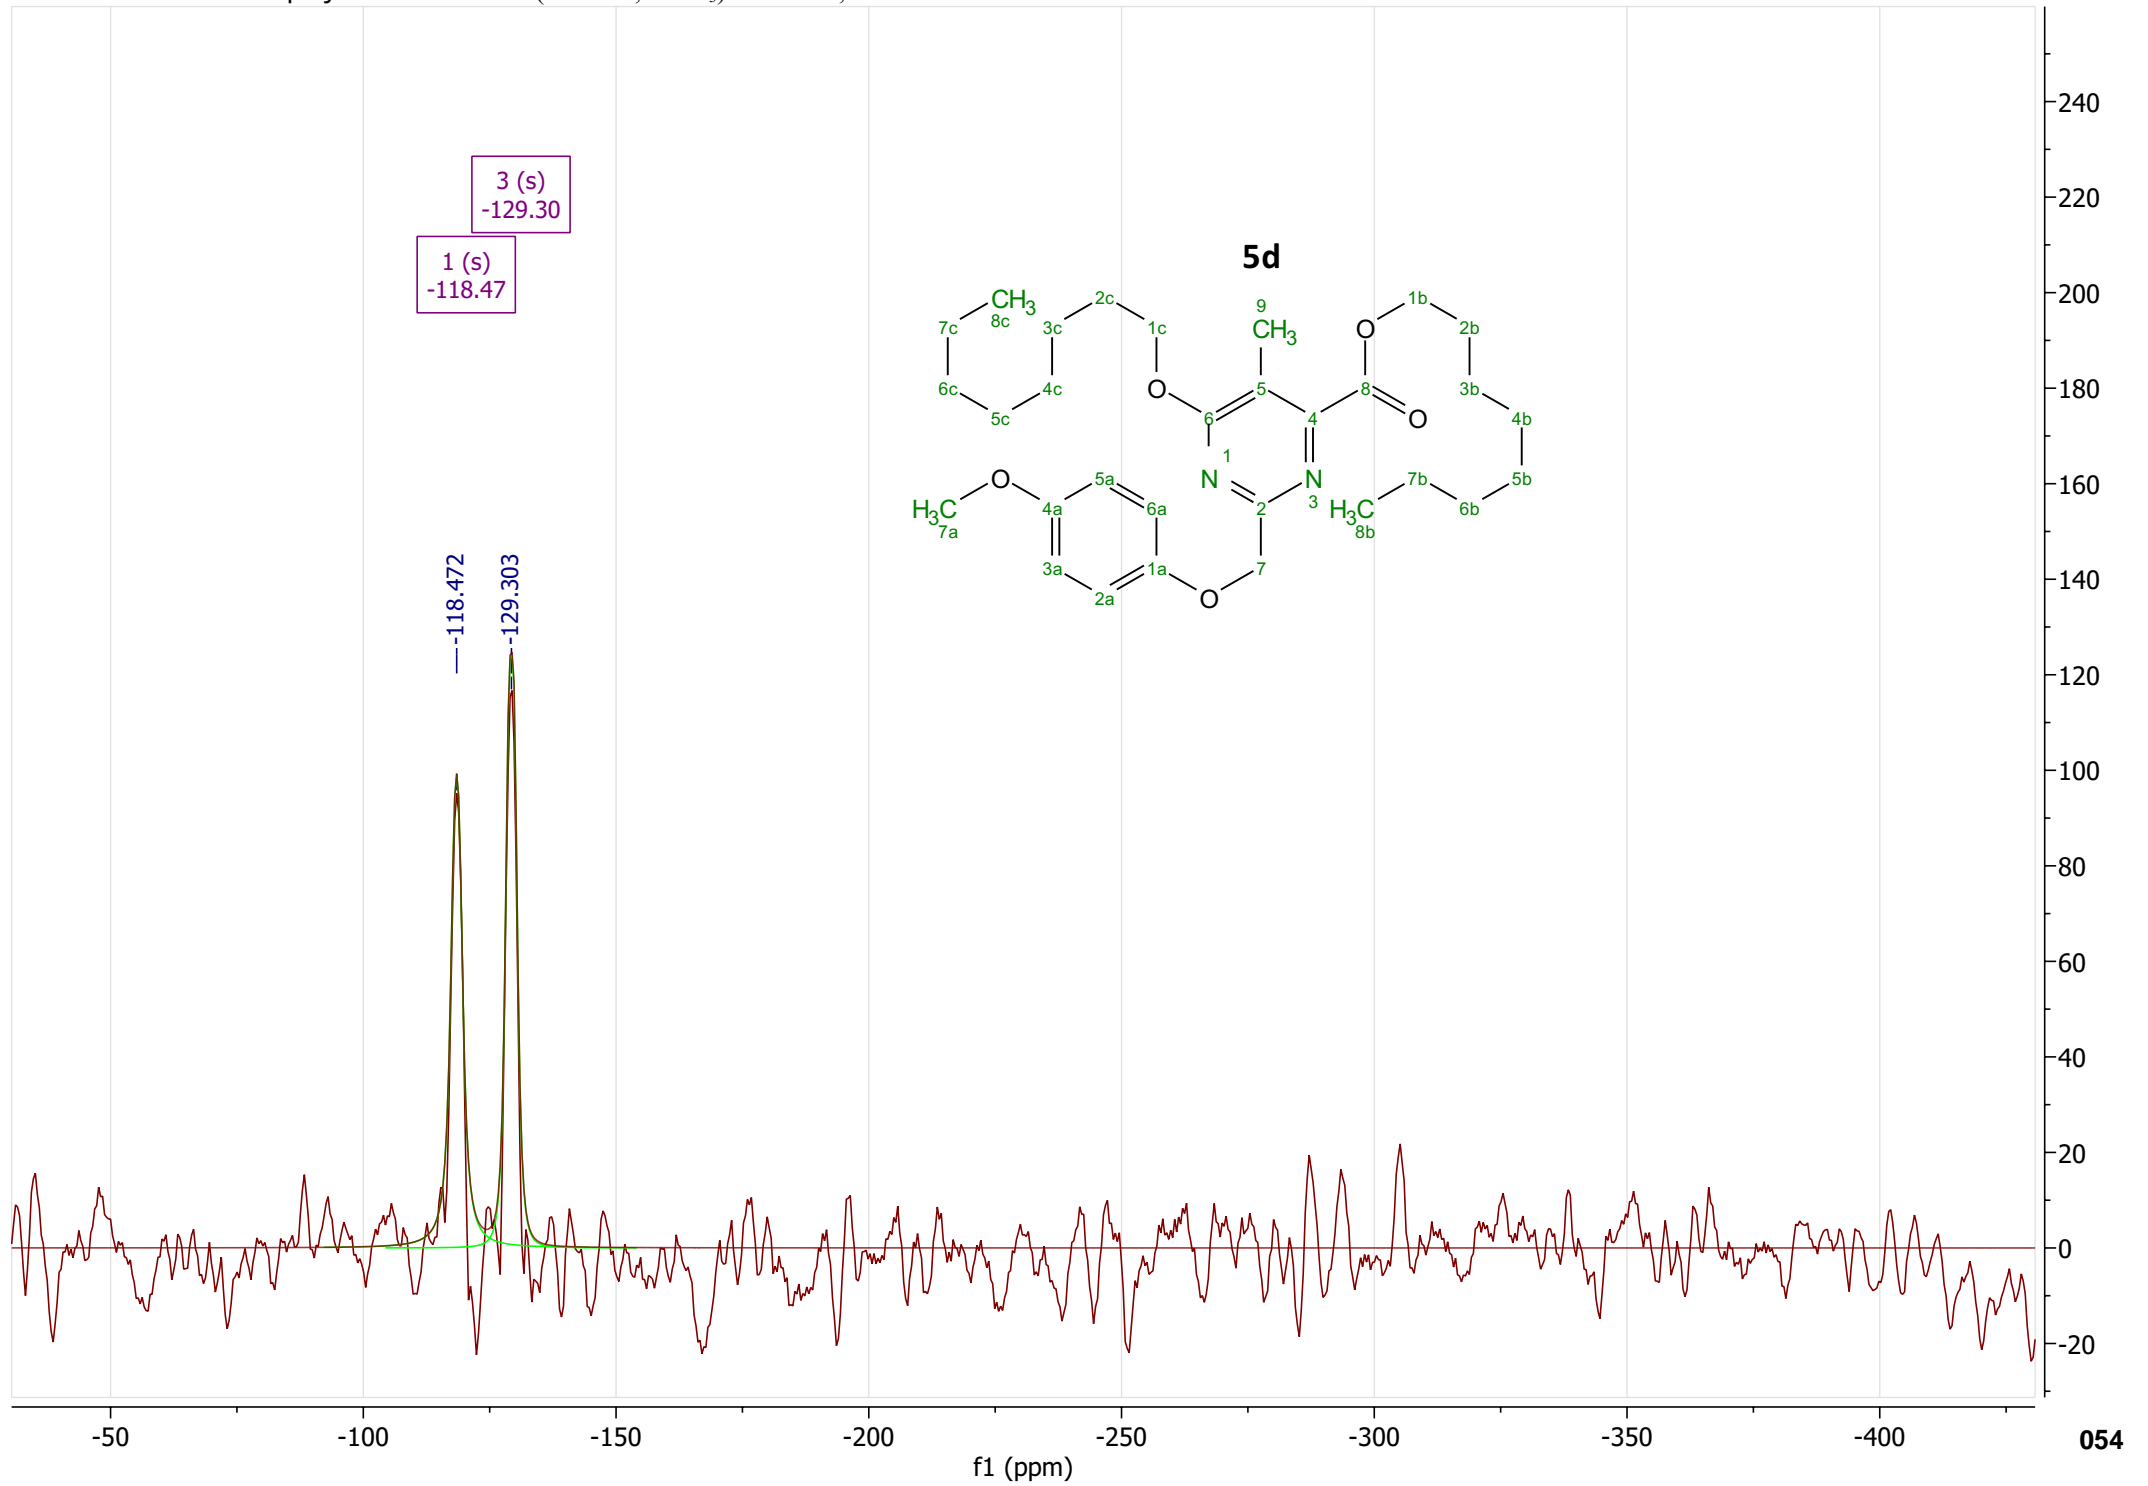

<sup>1</sup>H NMR (400 MHz, CDCl<sub>3</sub>) δ 6.96 – 6.90 (m, 2H), 6.84 – 6.76 (m, 2H), 5.13 (s, 2H), 4.37 (t, *J* = 6.9 Hz, 2H), 4.35 (t, *J* = 6.9 Hz, 2H), 3.75 (s, 3H), 2.26 (s, 3H), 1.83 – 1.71 (m, 2H), 1.75 – 1.65 (m, 2H), 1.45 – 1.35 (m, 4H), 1.34 – 1.21 (m, 20H), 0.880 (app t, *J* = 6.9 Hz, 3H), 0.875 (app t, *J* = 6.9 Hz, 3H).

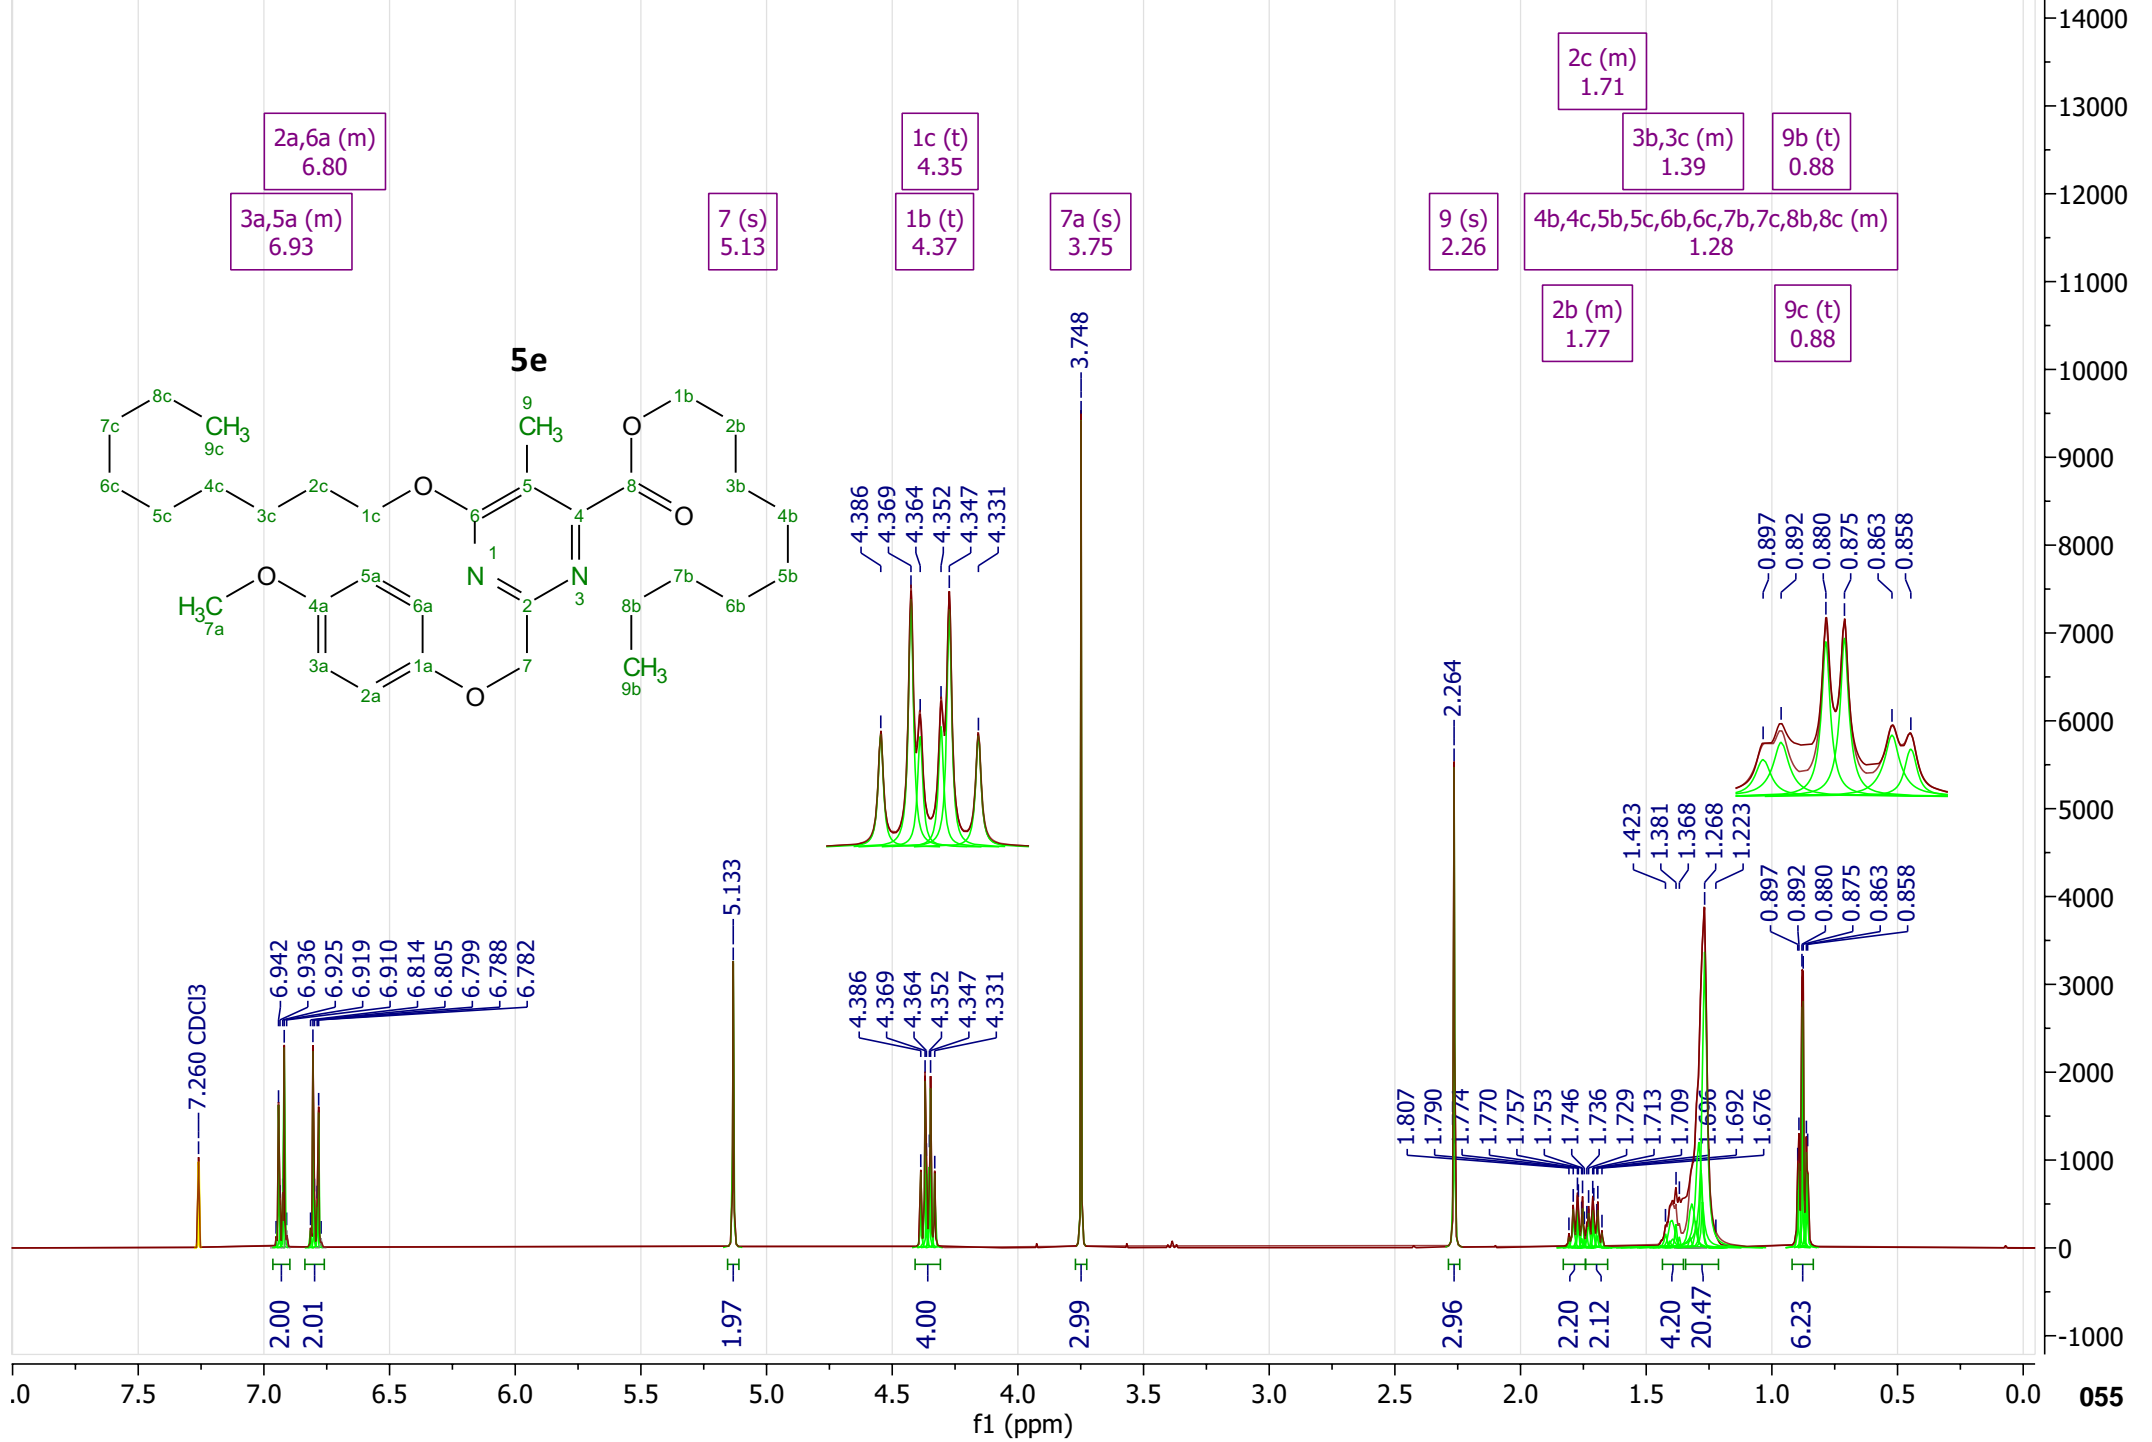

$^{13}\text{C}$  NMR (101 MHz,  $\text{CDCl}_3$ )  $\delta$  169.3, 165.9, 163.1, 155.1, 154.1, 153.0, 116.6, 116.1 (sym, 2C), 114.6 (sym, 2C), 71.2, 67.7, 66.4, 55.8, 32.00, 31.98, 29.64, 29.59, 29.43, 29.37, 29.36 (2C), 28.73, 28.66, 26.1, 26.0, 22.80, 22.79, 14.2 (2C), 11.1.

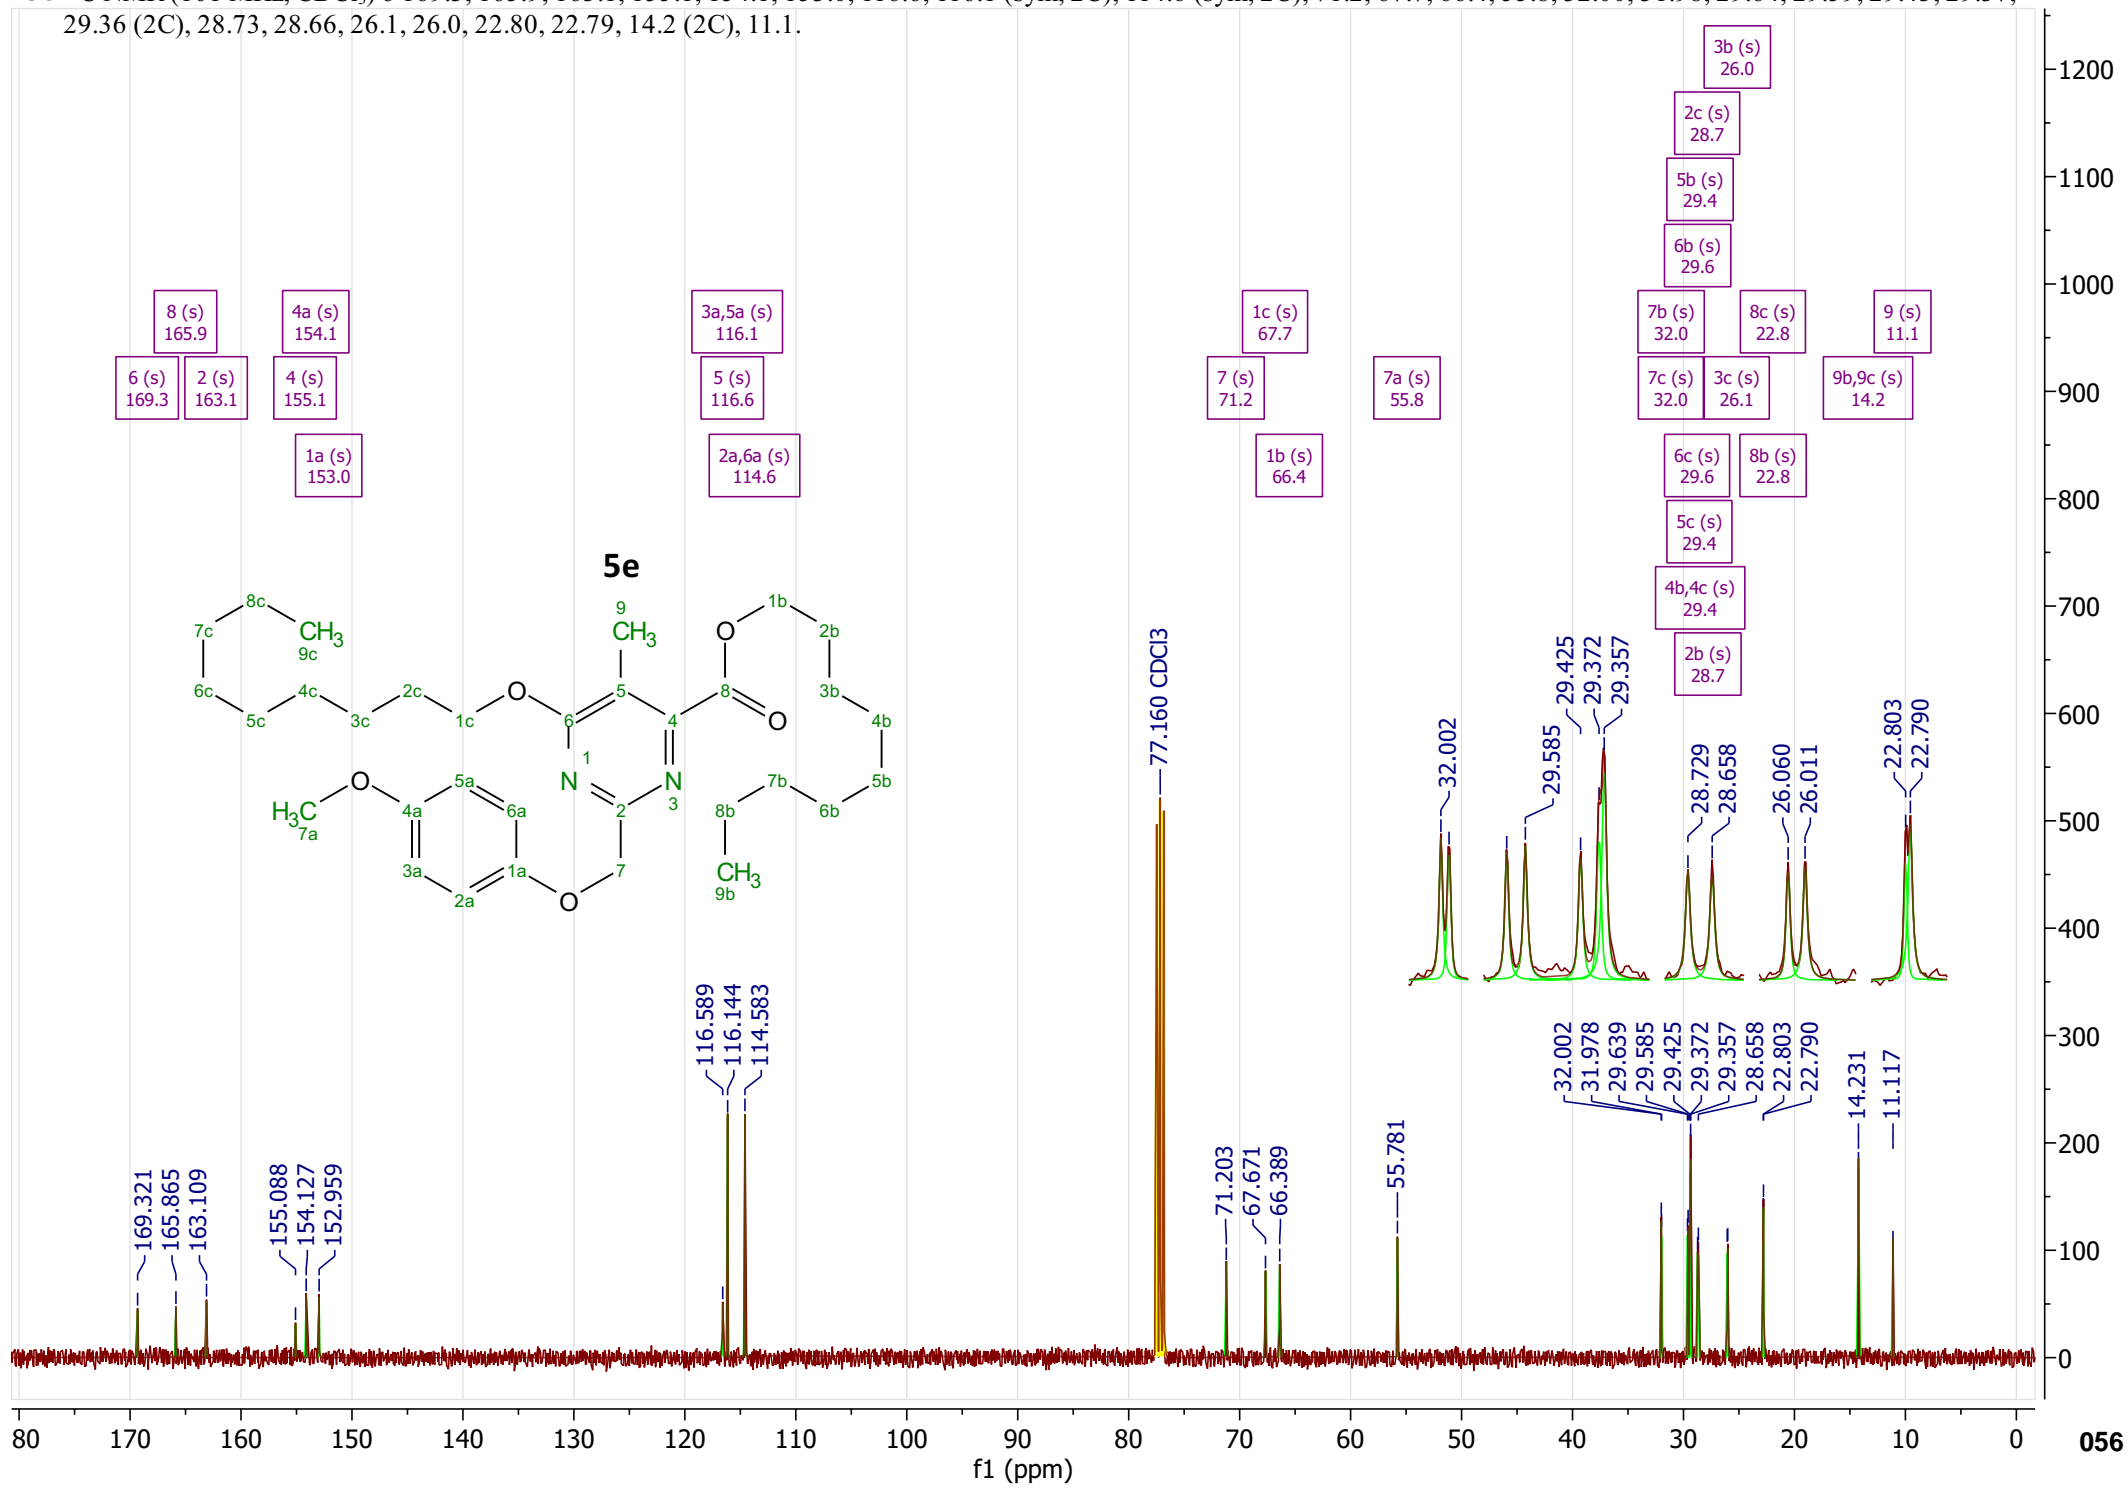



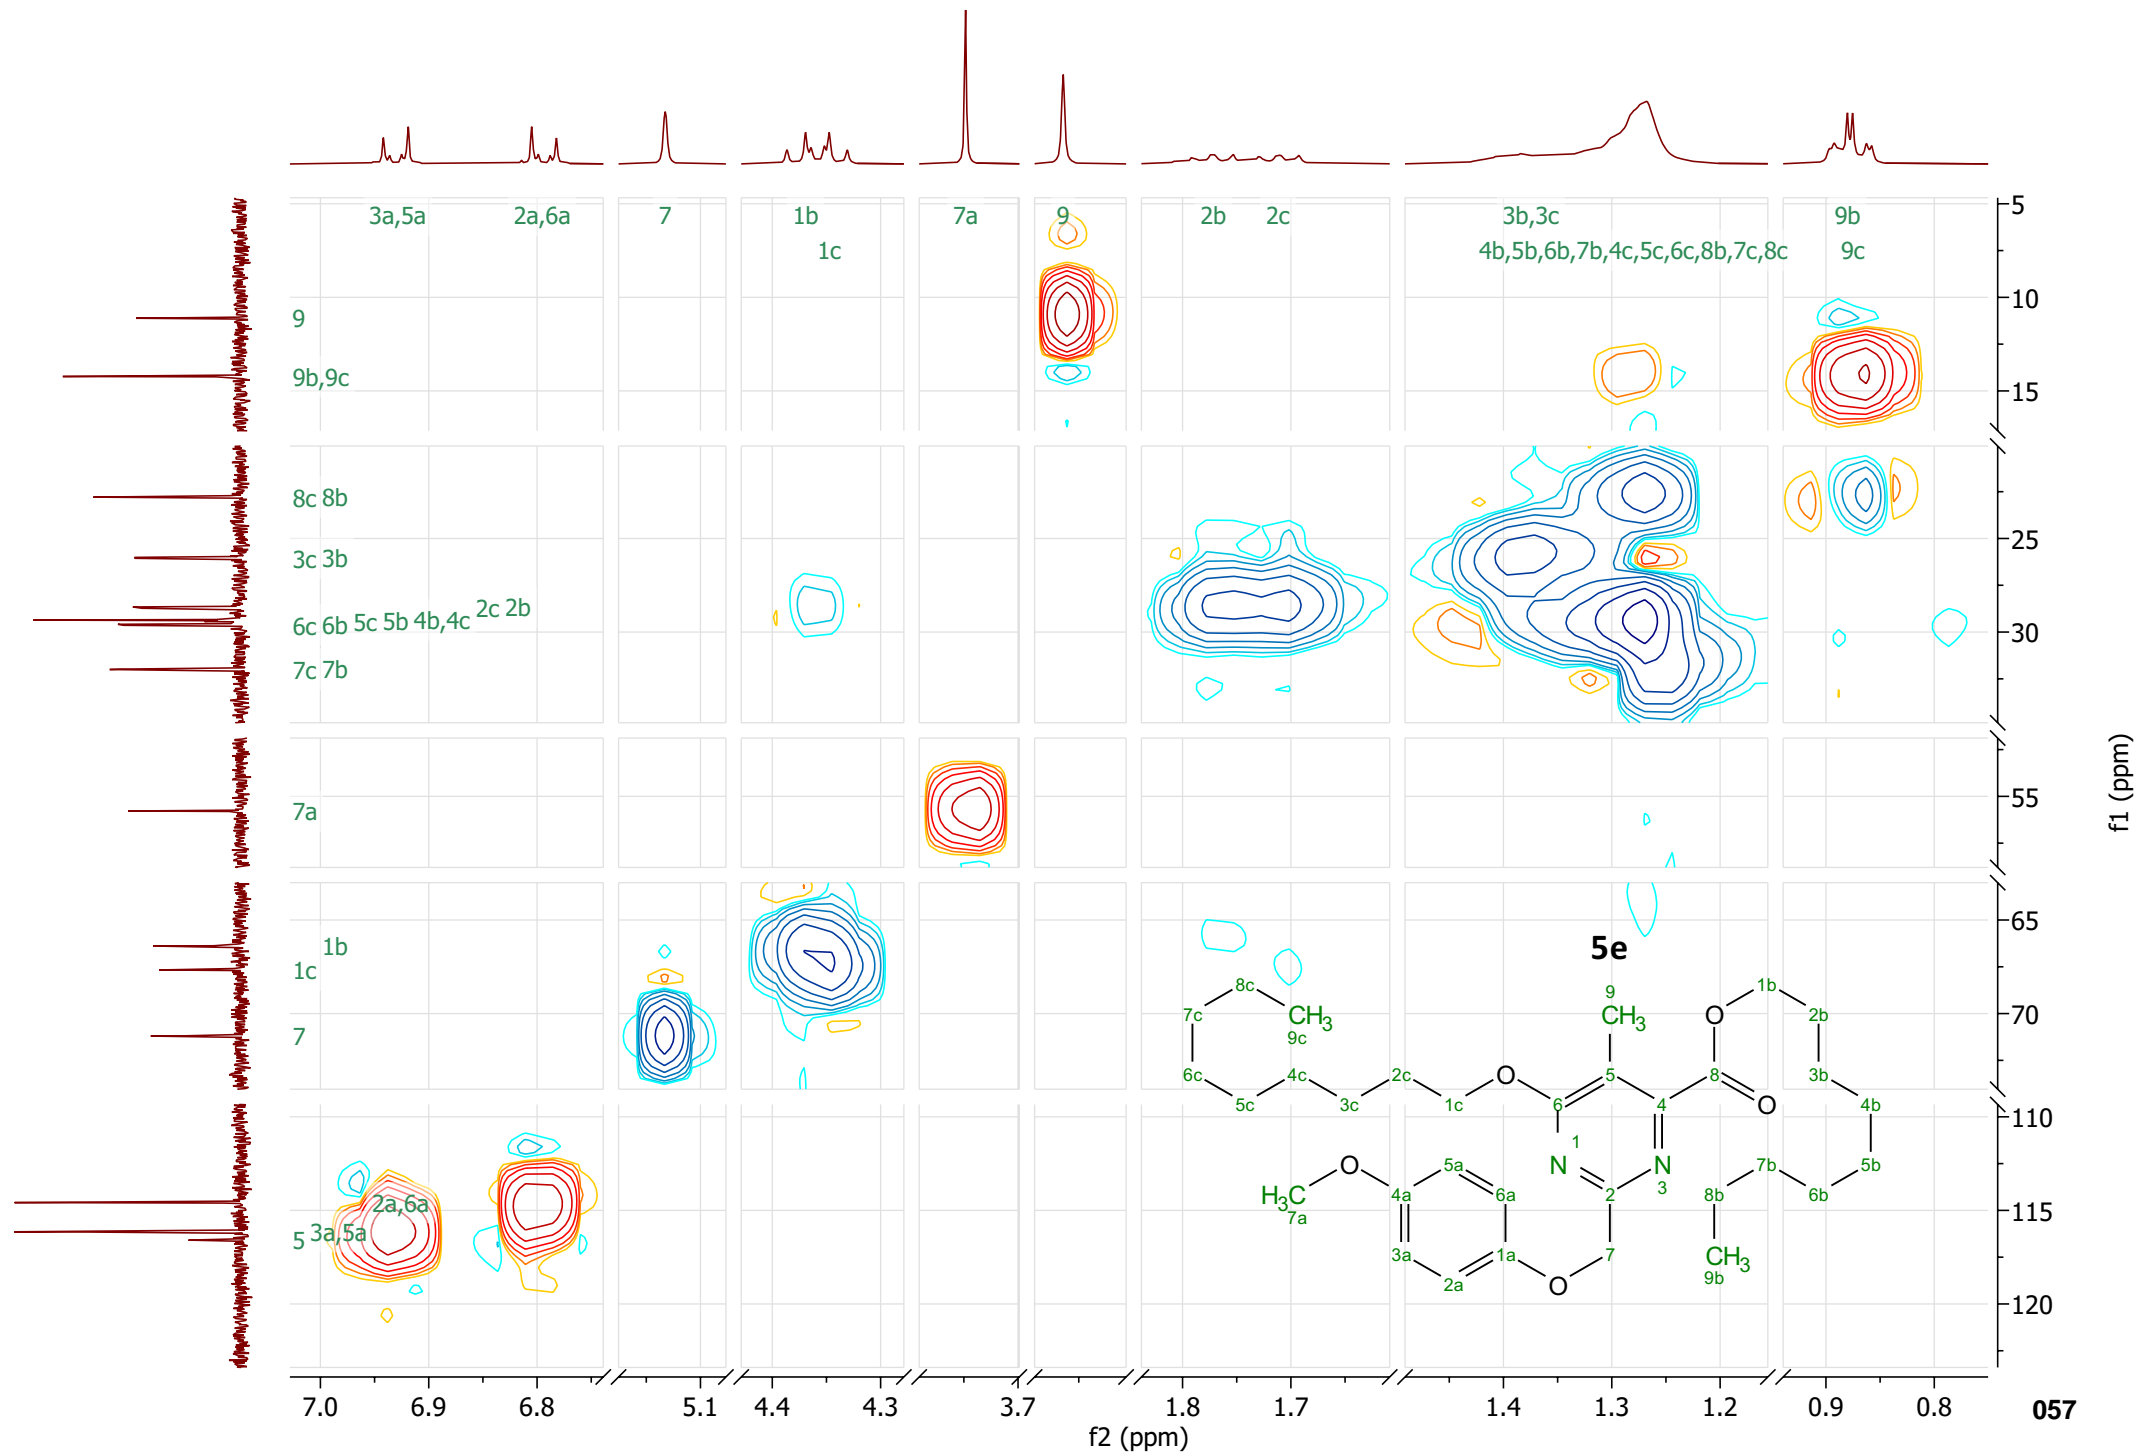

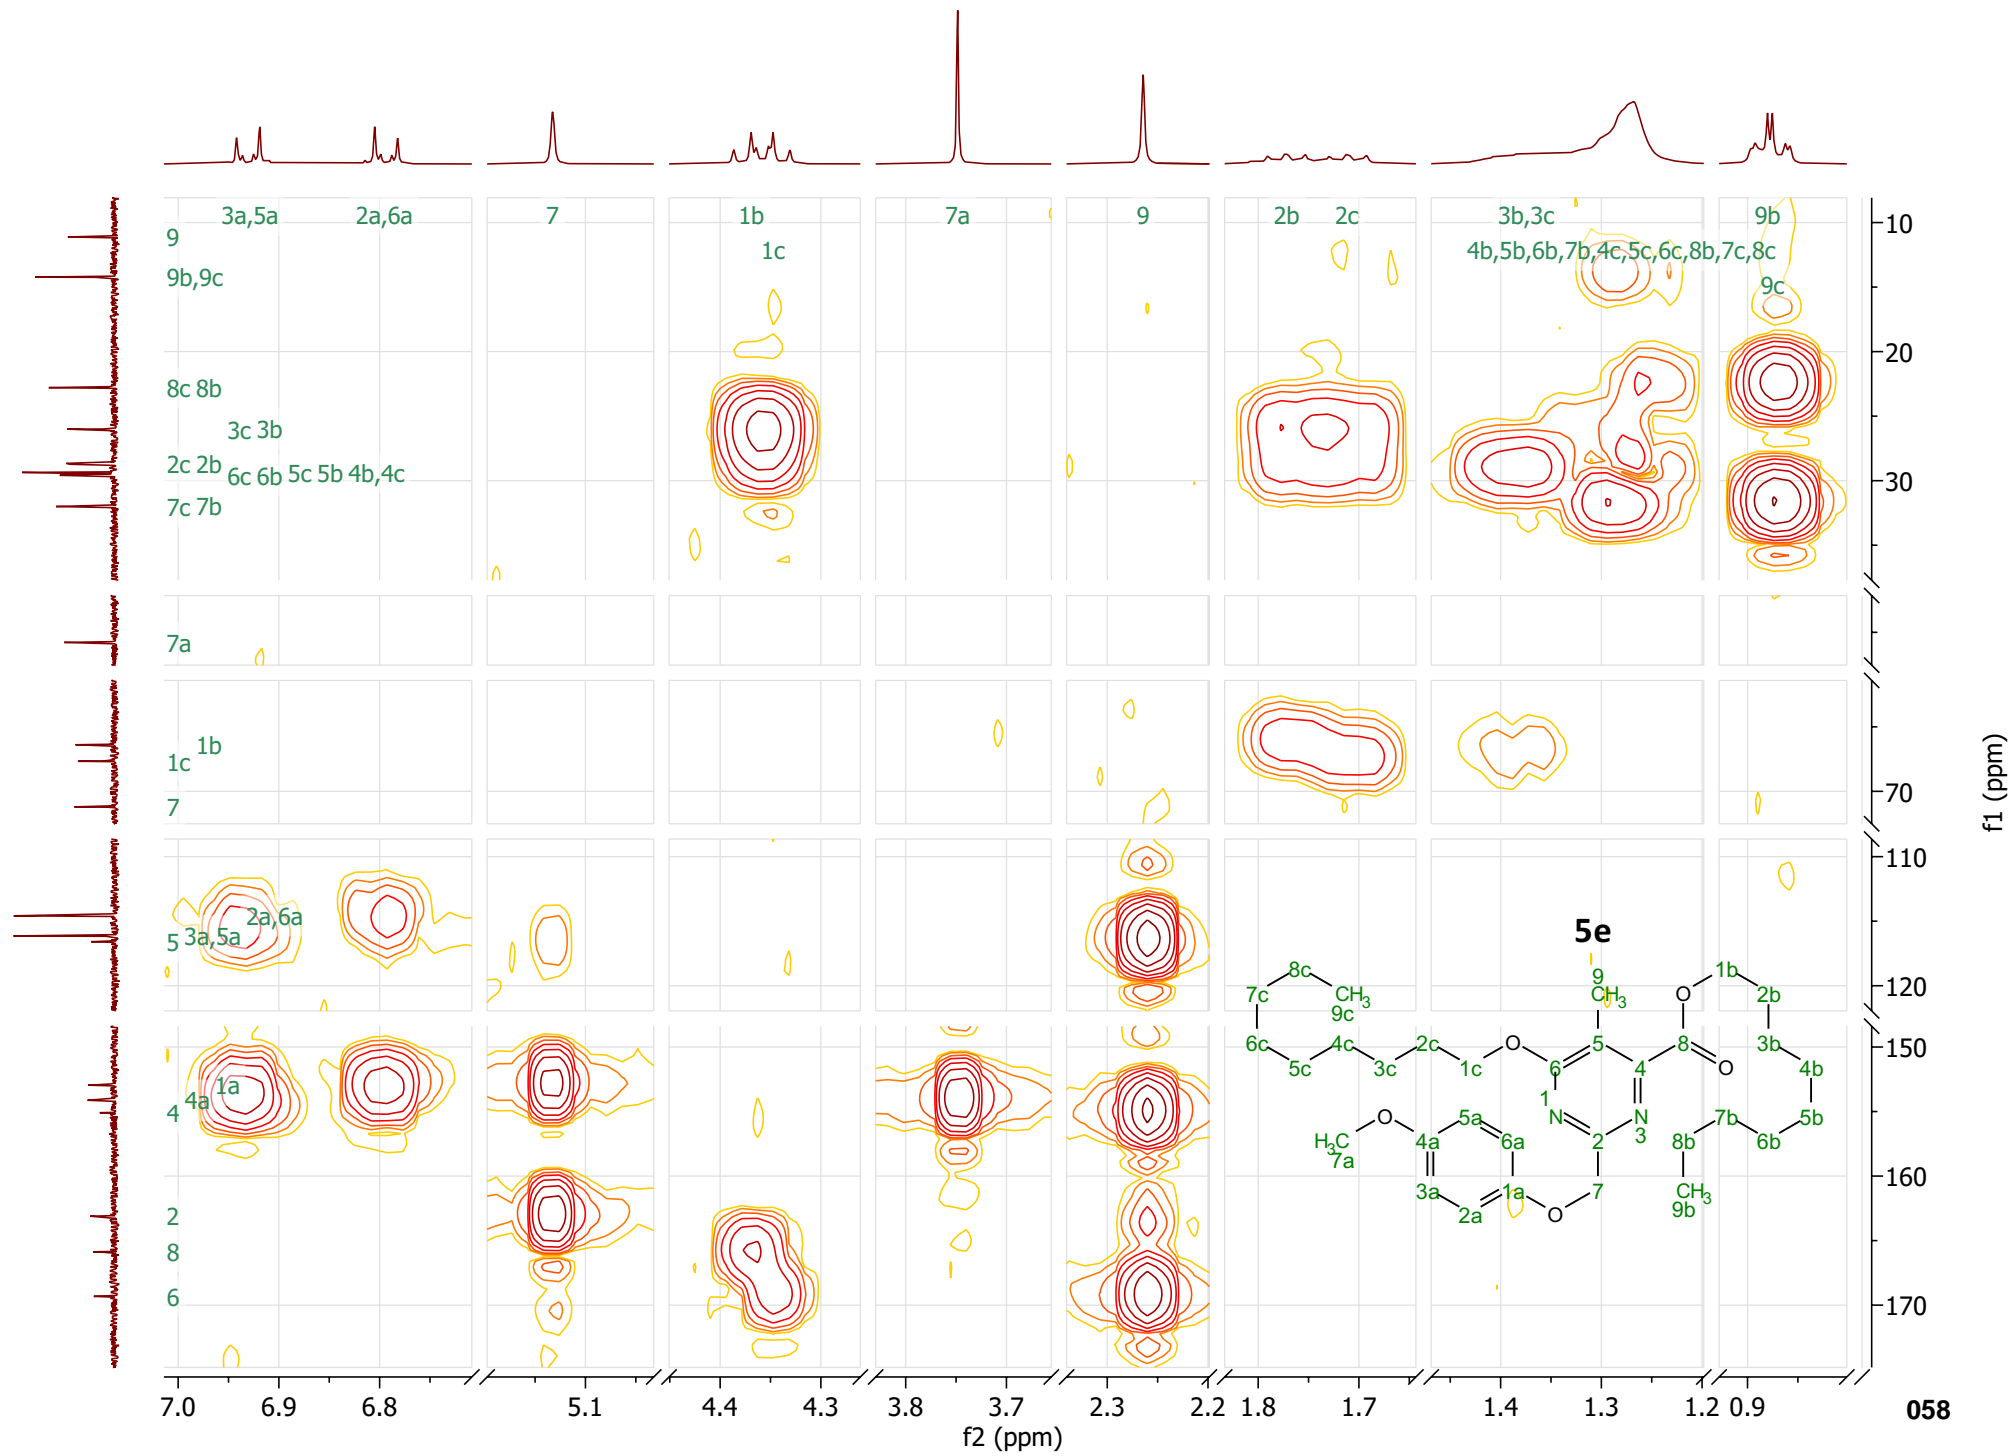

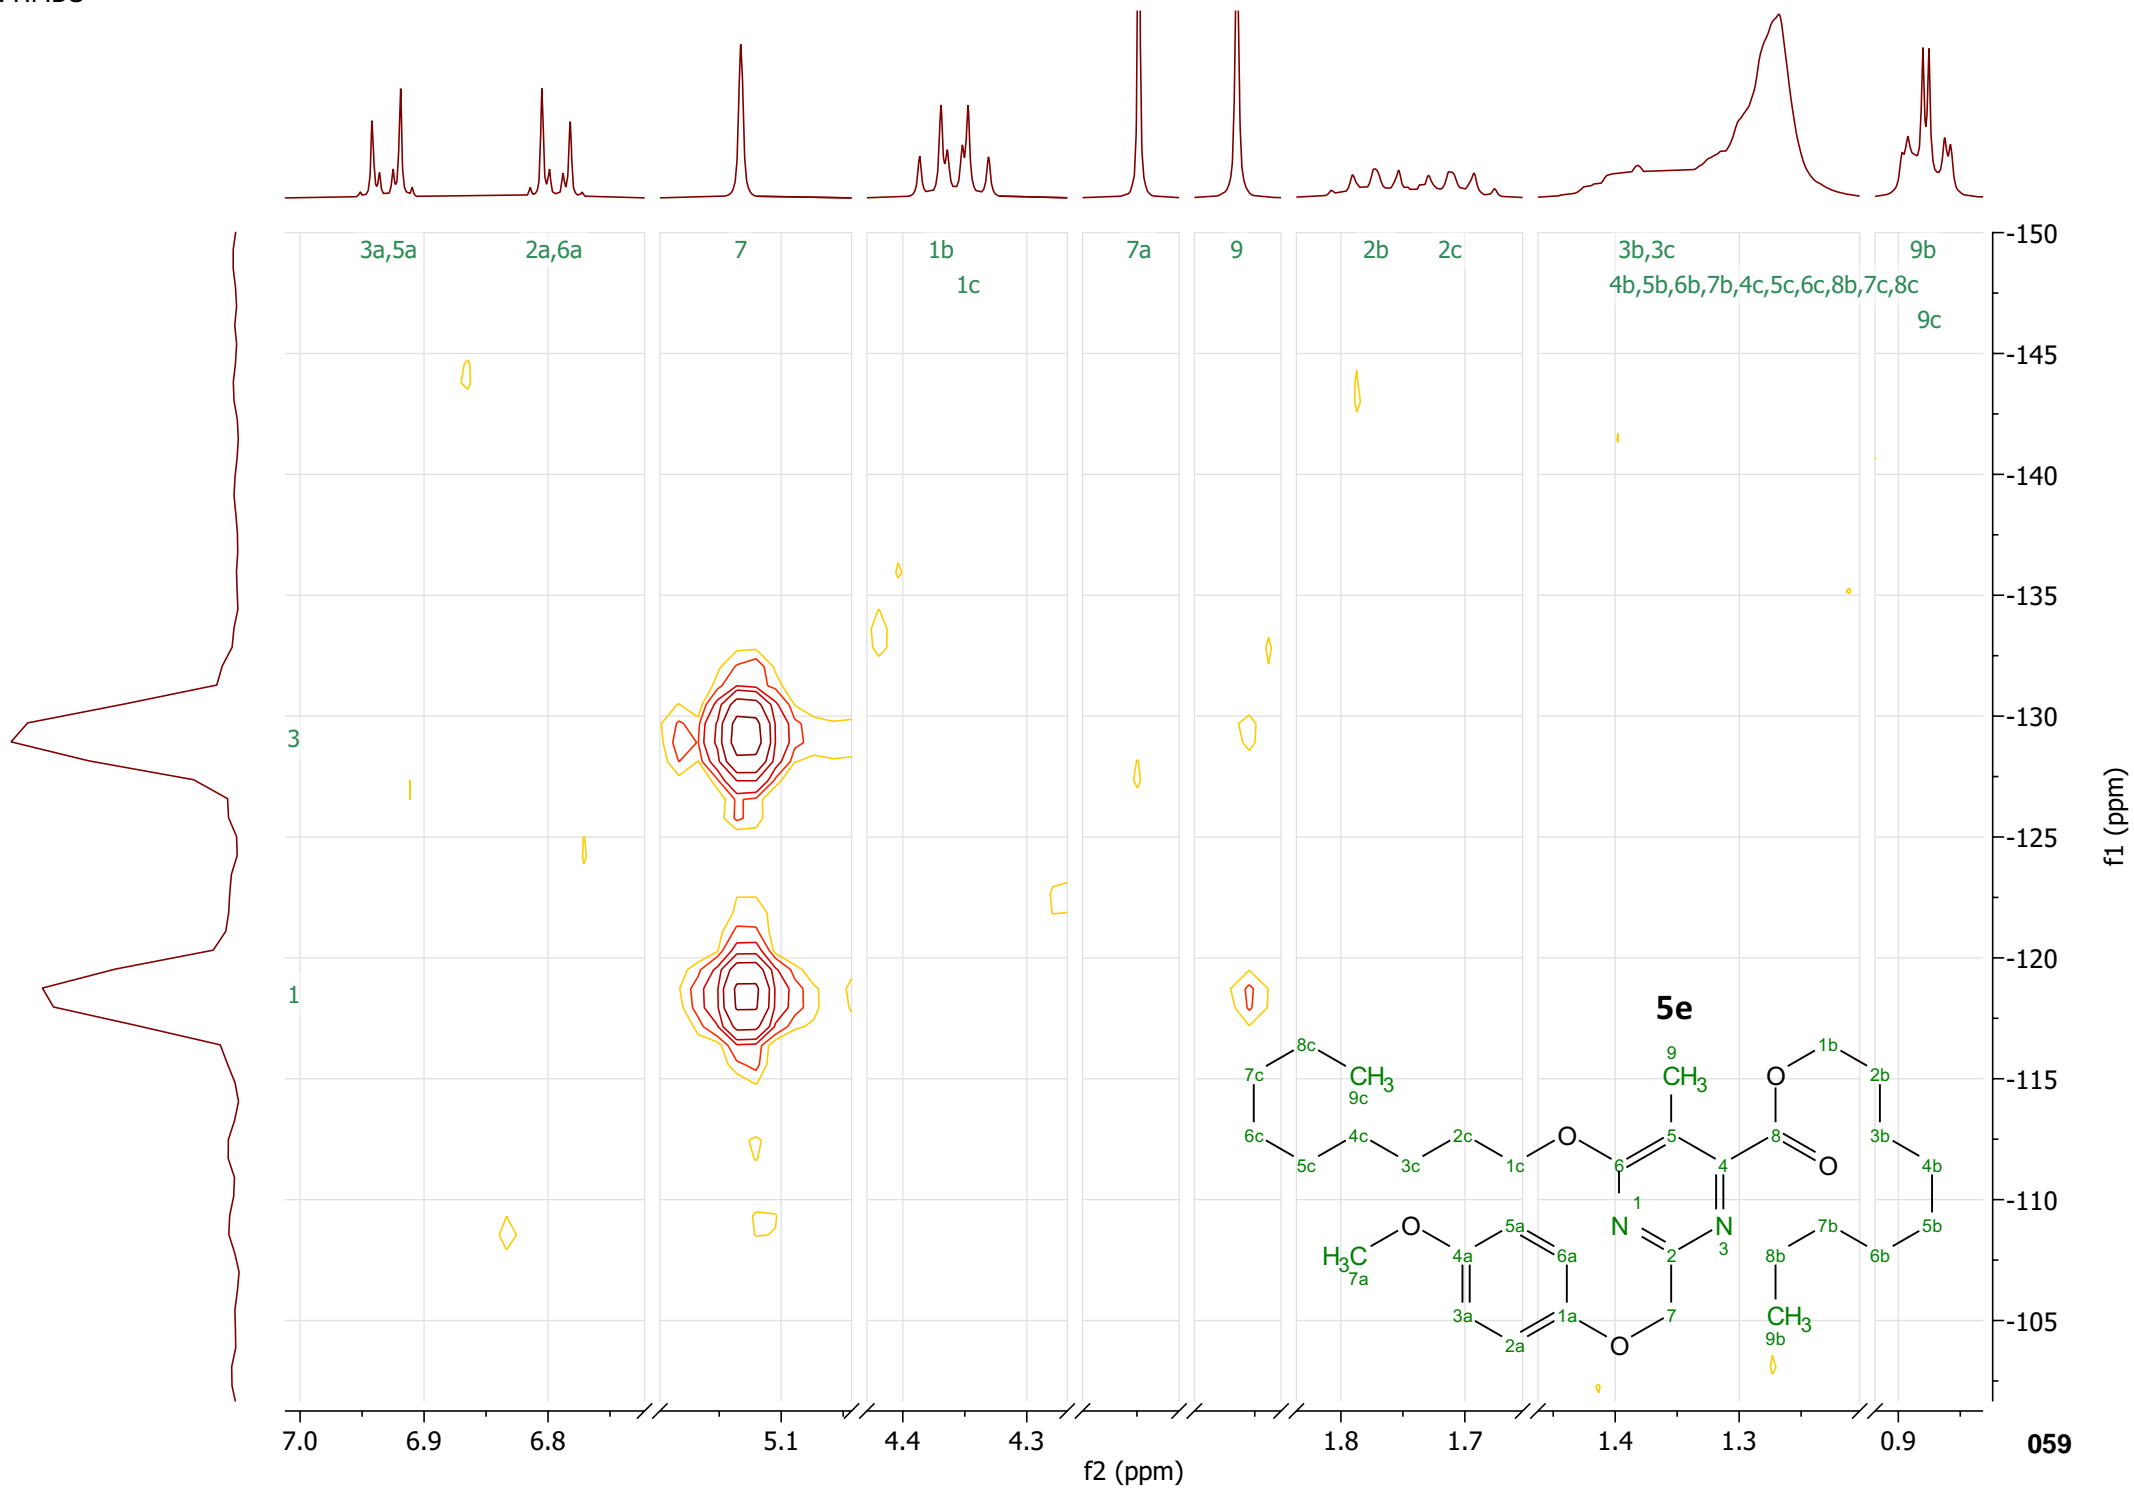

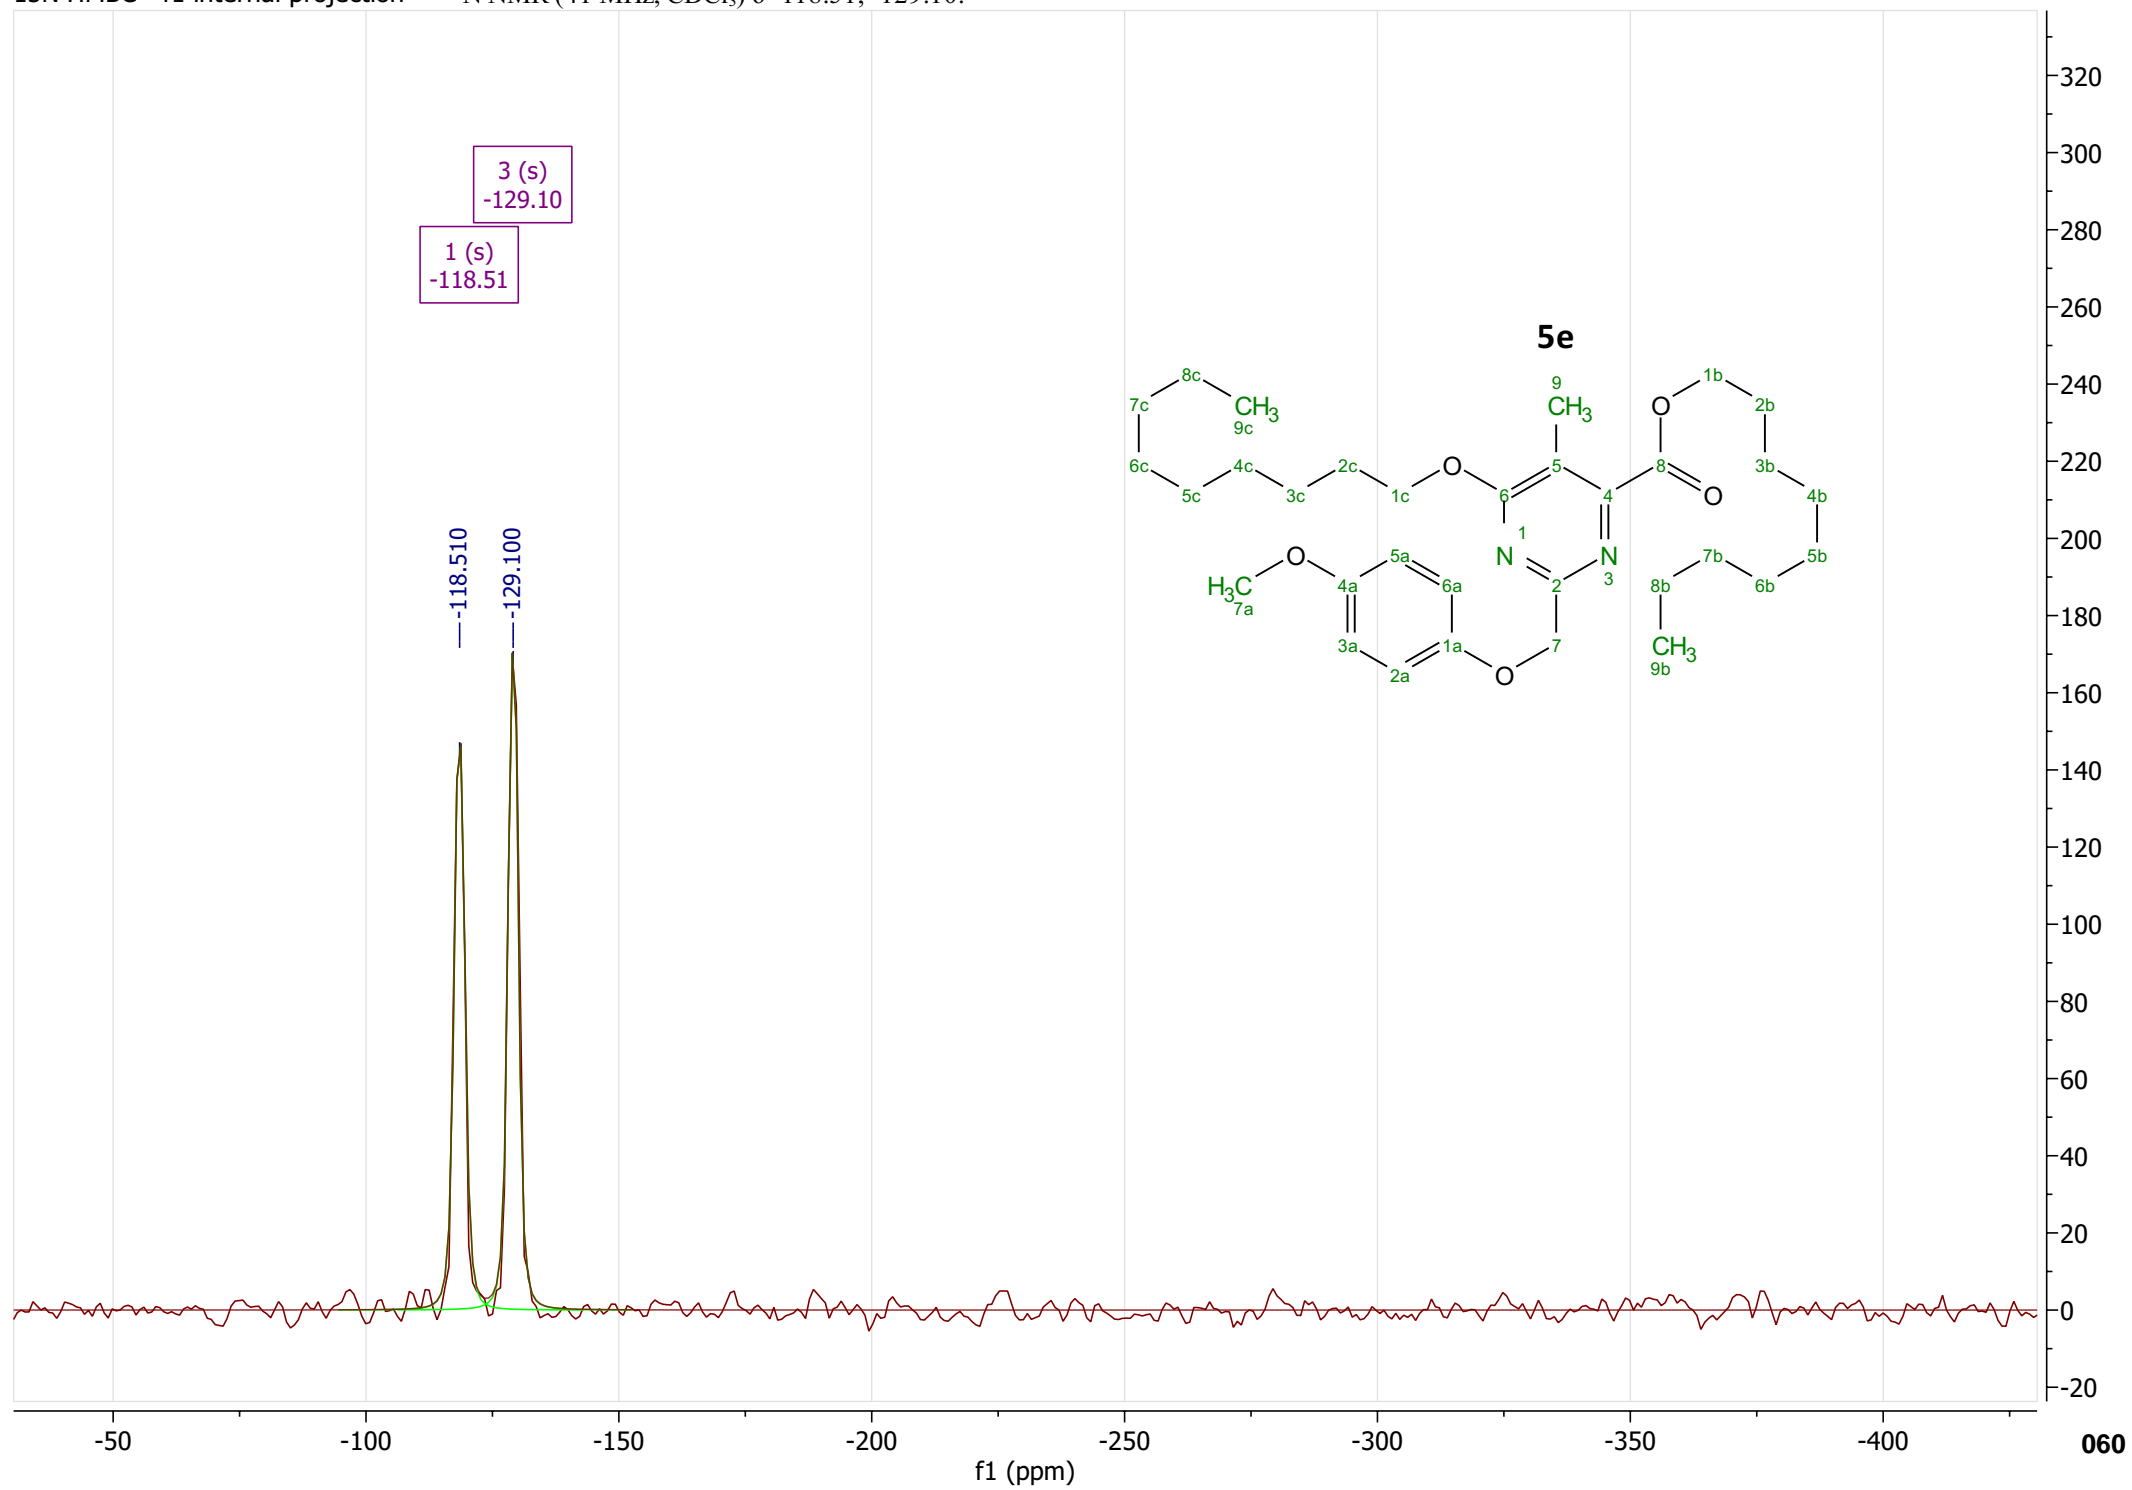

$^1\text{H}$  NMR (400 MHz,  $\text{CDCl}_3$ )  $\delta$  6.98 – 6.90 (m, 2H), 6.85 – 6.76 (m, 2H), 5.20 (s, 2H), 4.40 (t,  $J = 6.7$  Hz, 2H), 3.75 (s, 3H), 2.49 (s, 3H), 2.49 (s, 3H), 1.81 – 1.70 (m, 2H), 1.51 – 1.37 (m, 2H), 0.97 (t,  $J = 7.4$  Hz, 3H).

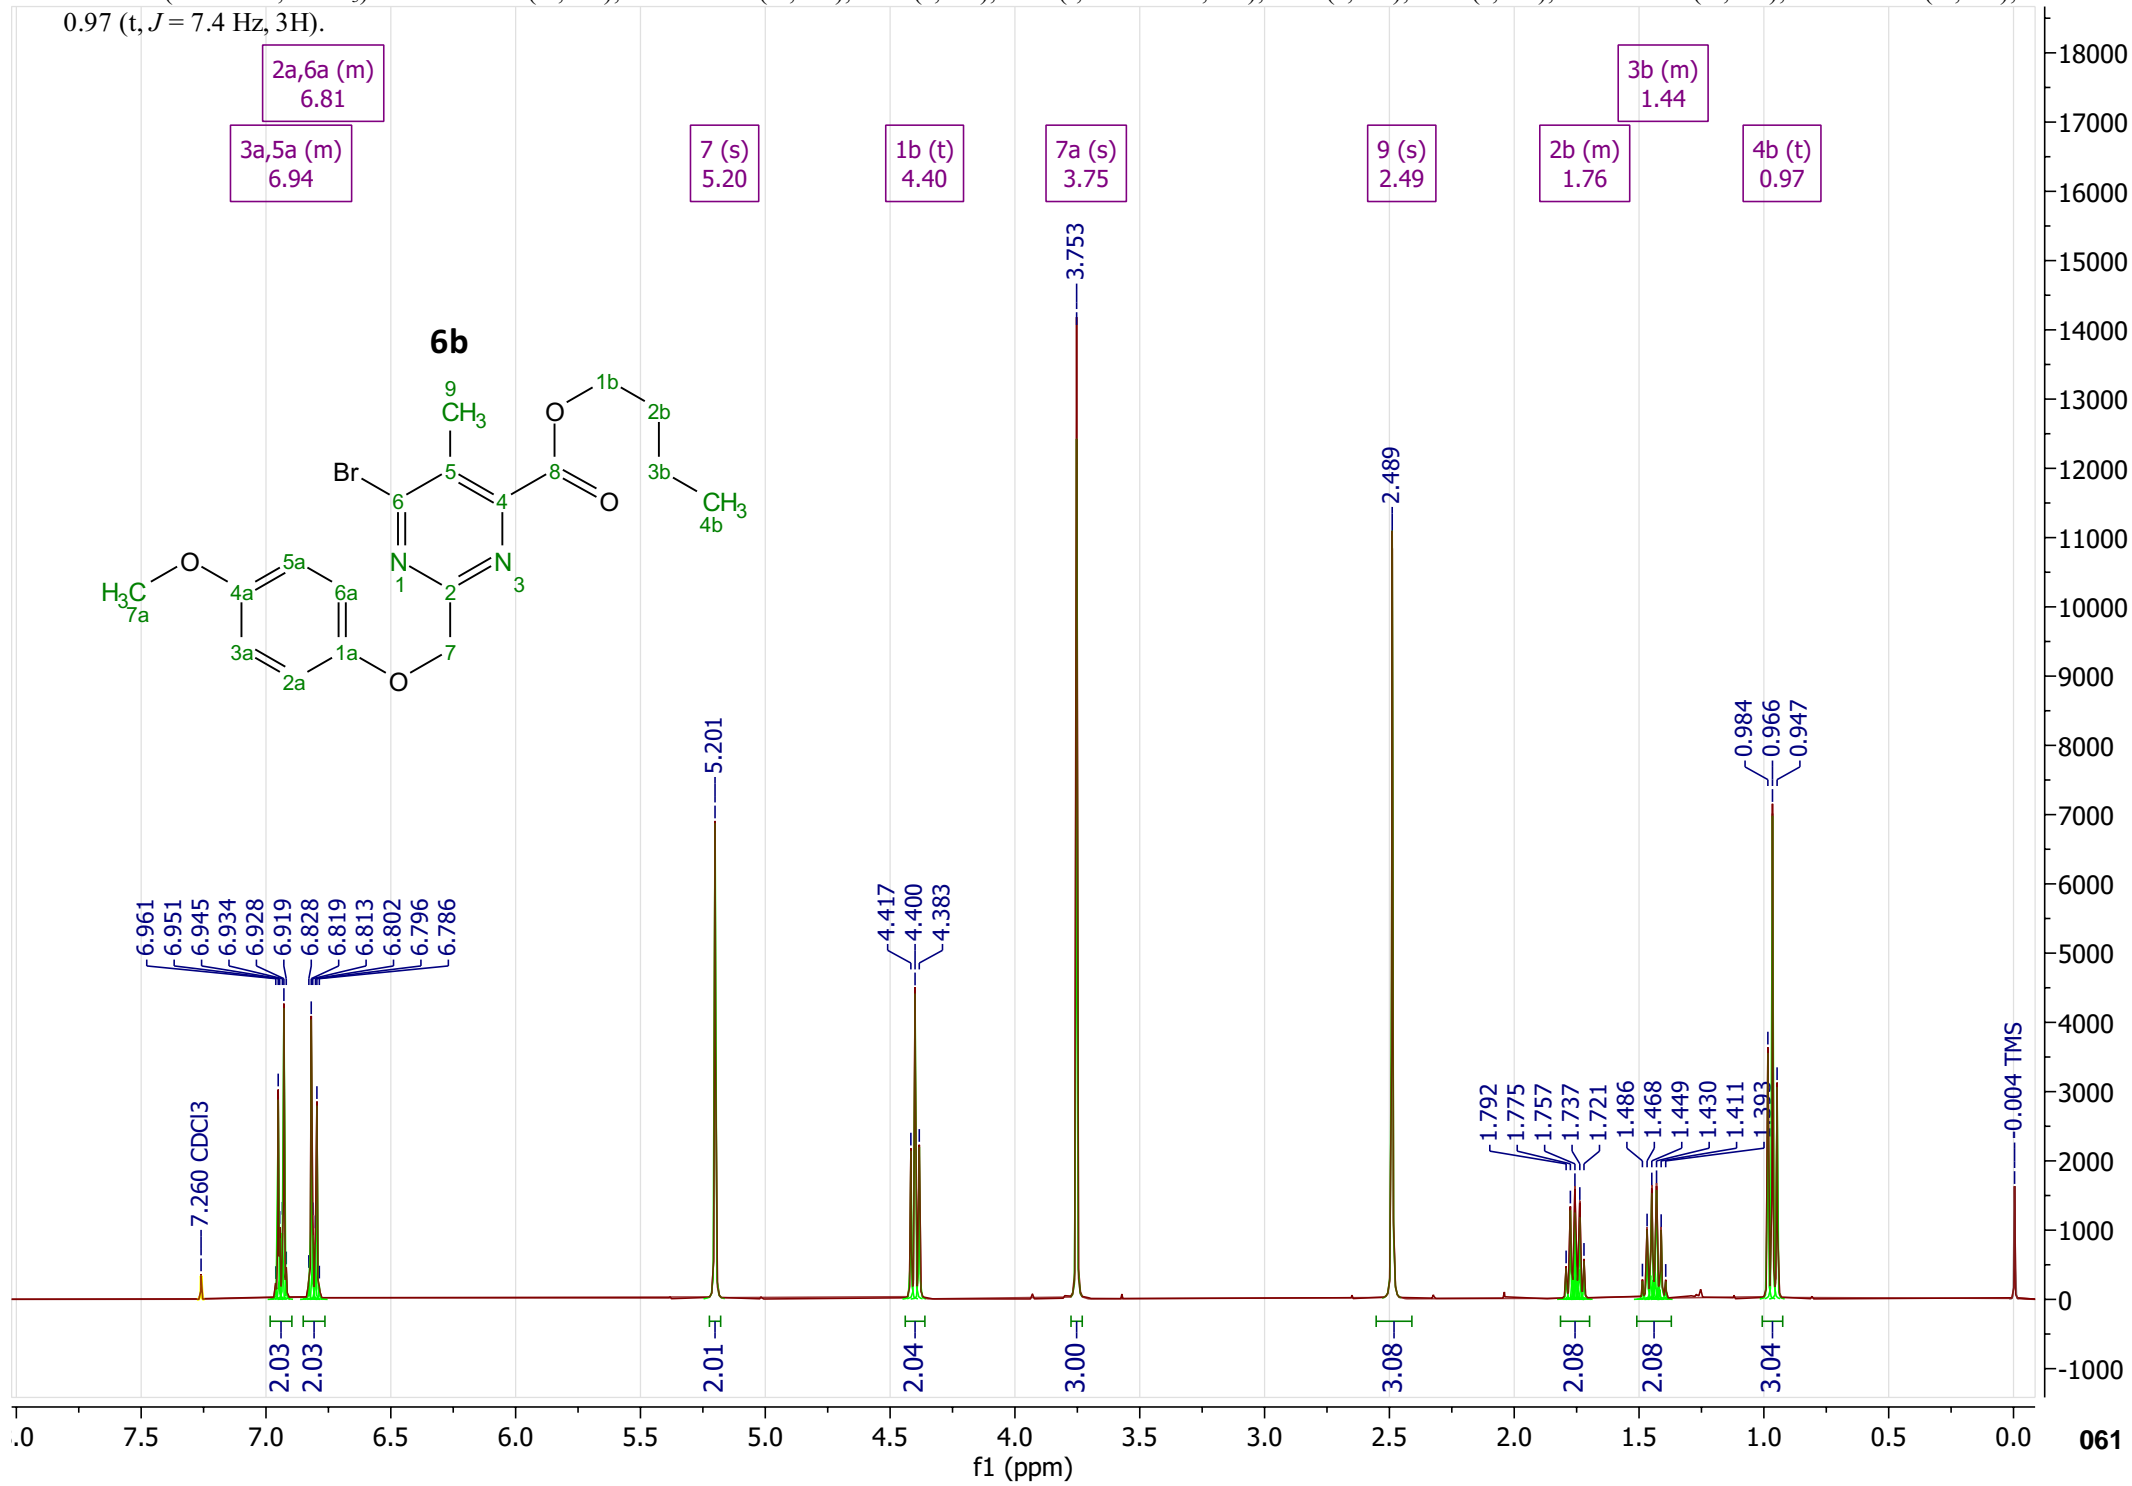

$^{13}\text{C}$  NMR (101 MHz,  $\text{CDCl}_3$ )  $\delta$  164.7, 164.0, 158.2, 157.0, 154.4, 152.6, 130.1, 116.4 (sym, 2C), 114.7 (sym, 2C), 70.9, 66.7, 55.8, 30.6, 19.2, 17.8, 13.8.

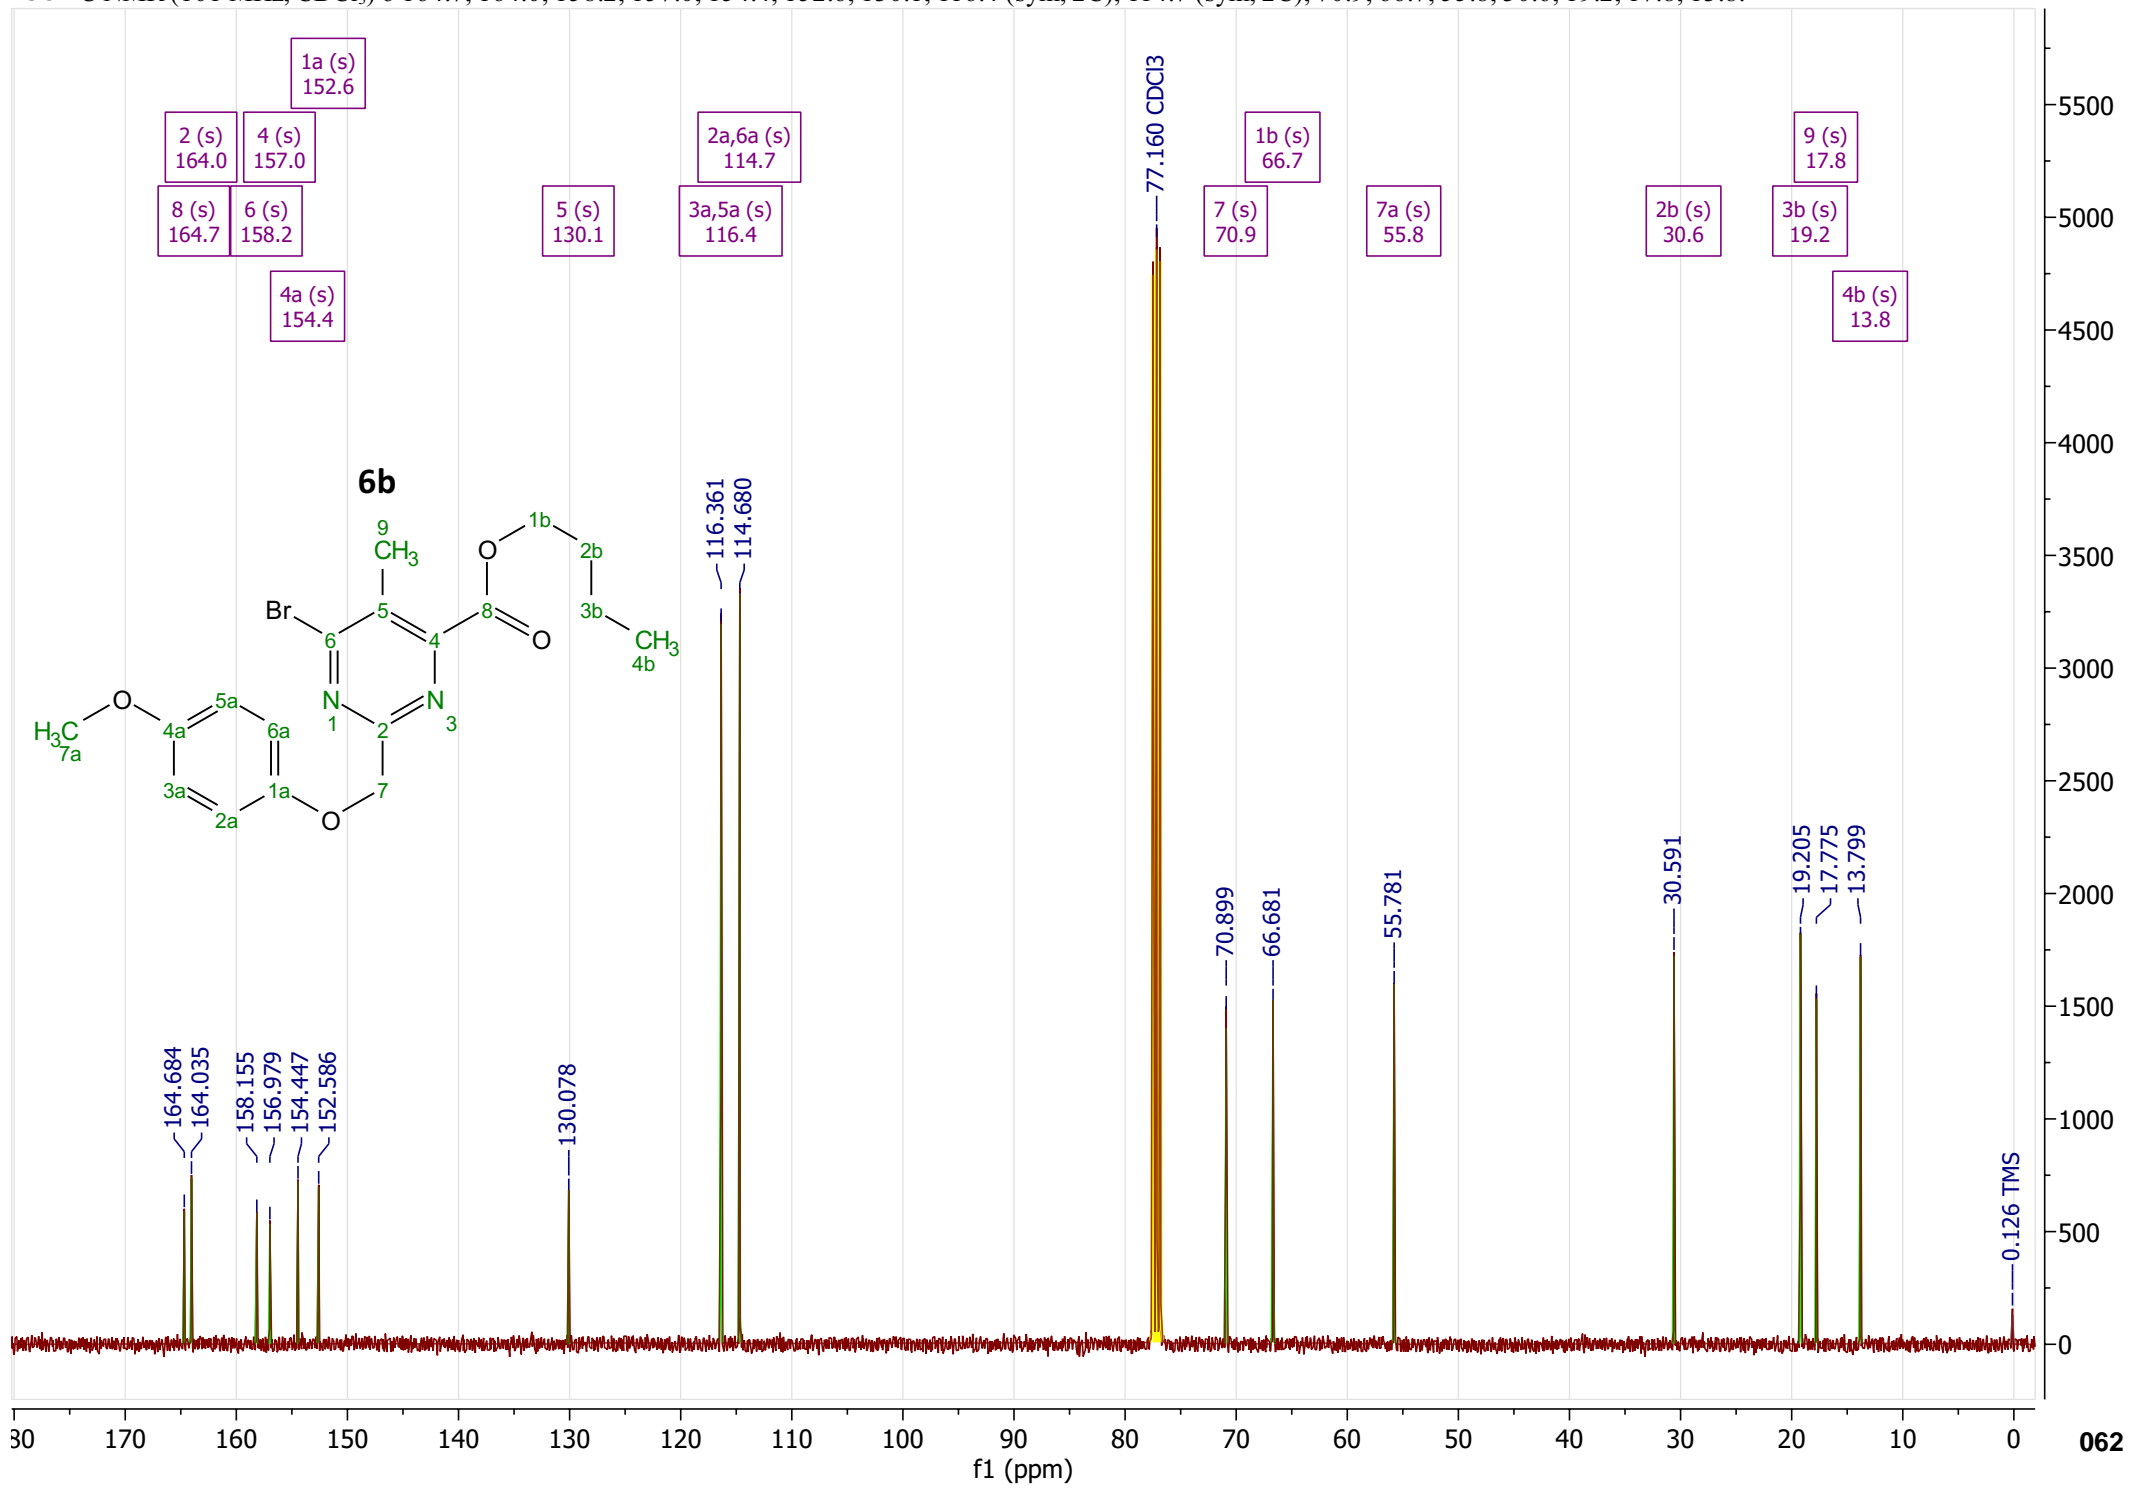



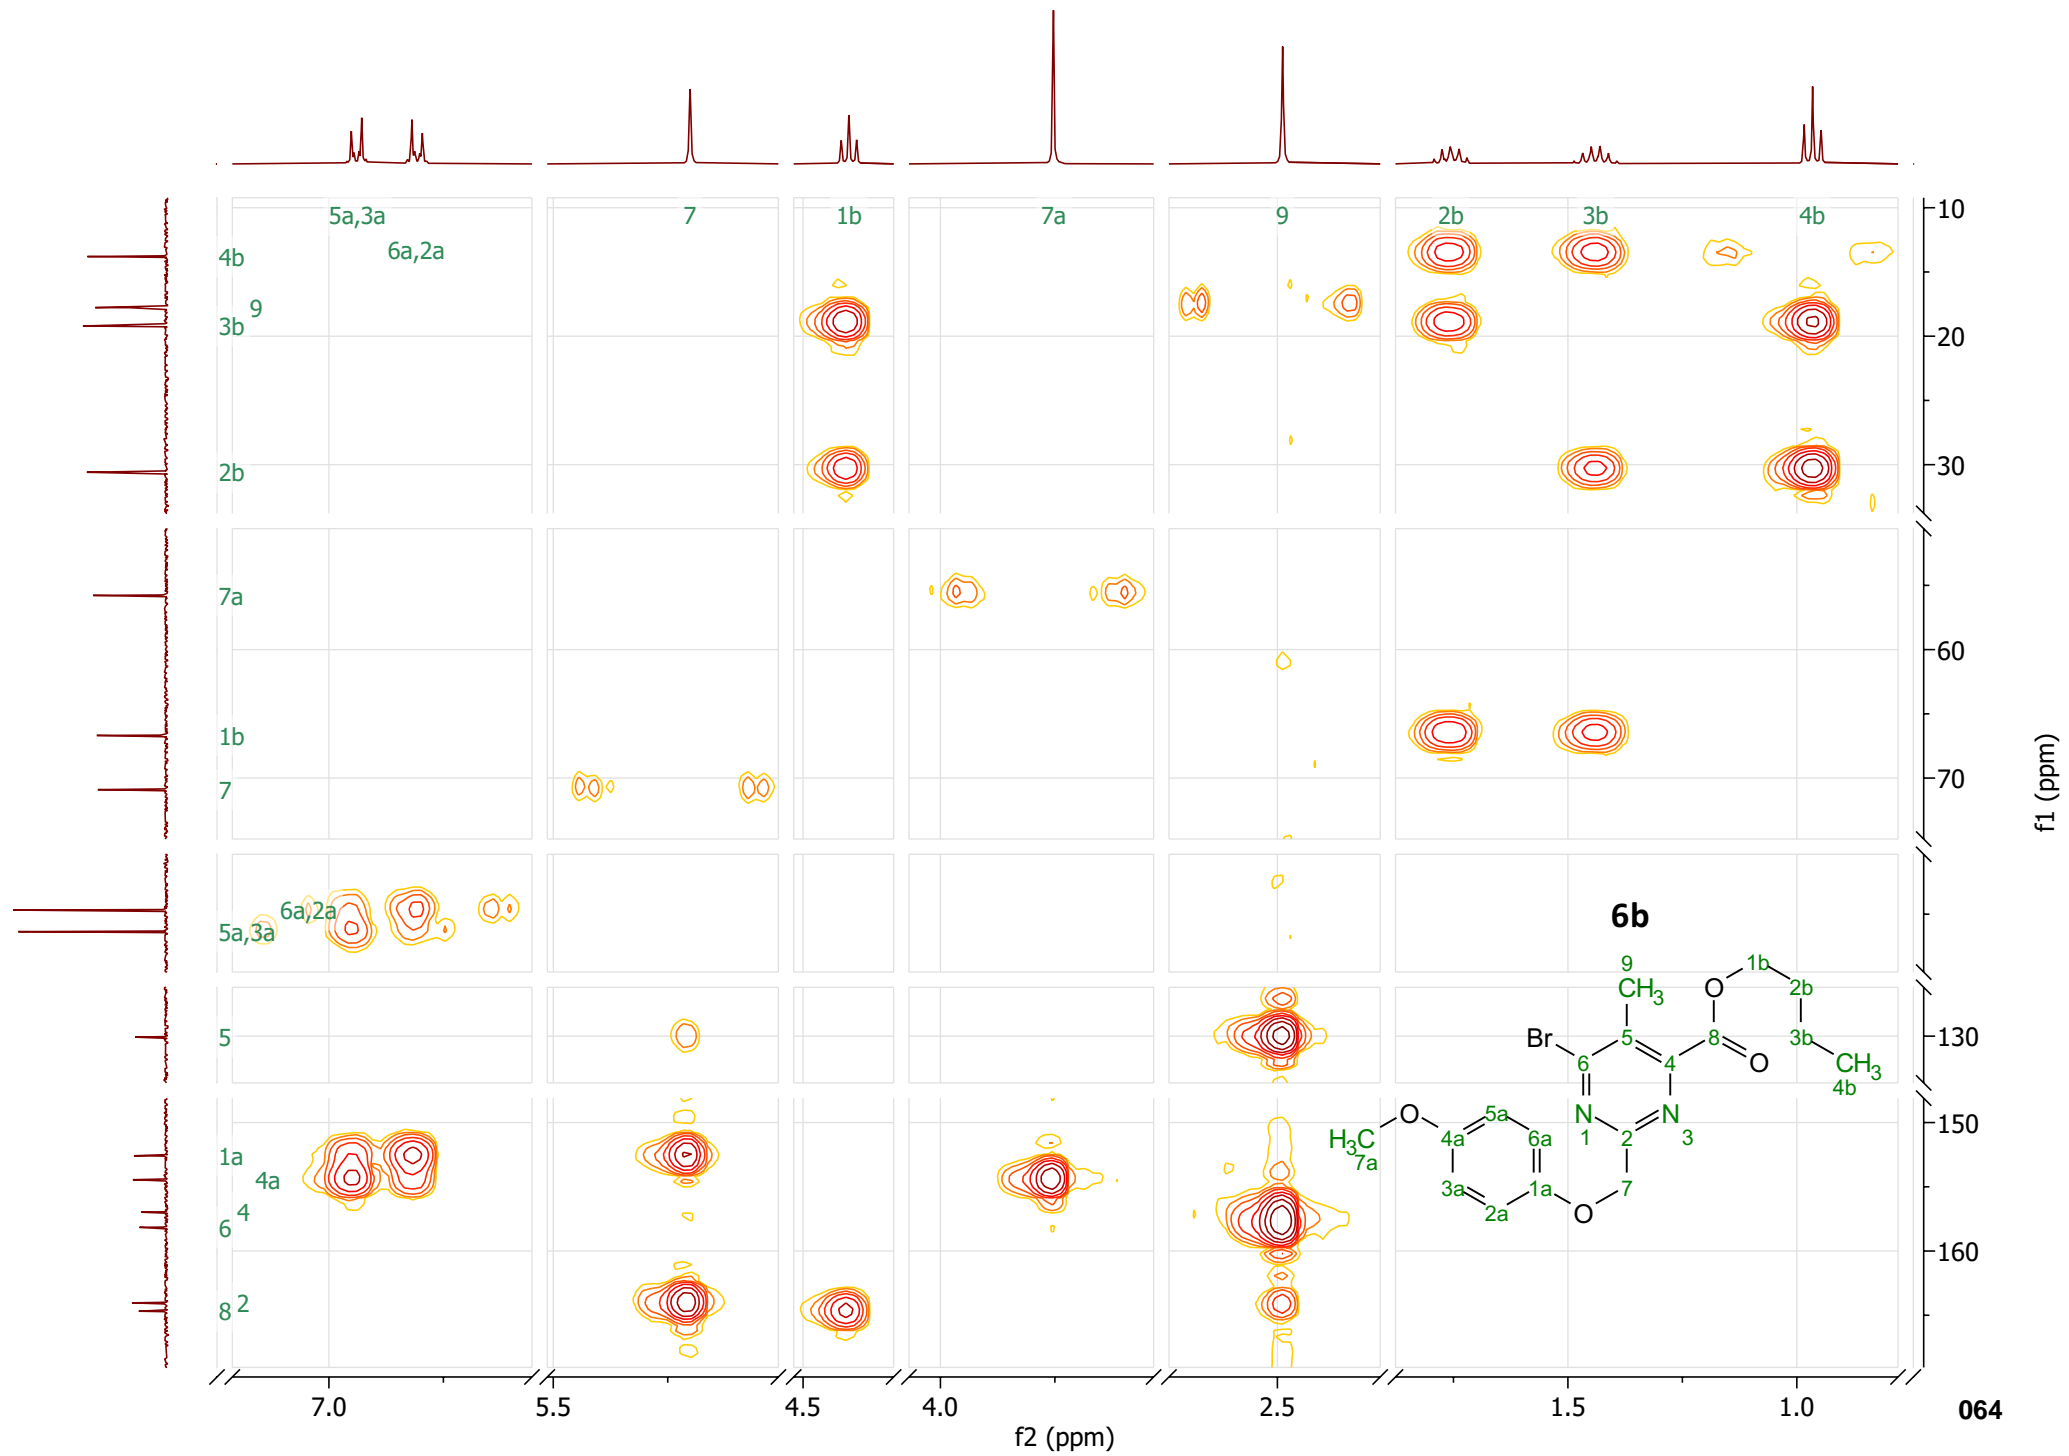



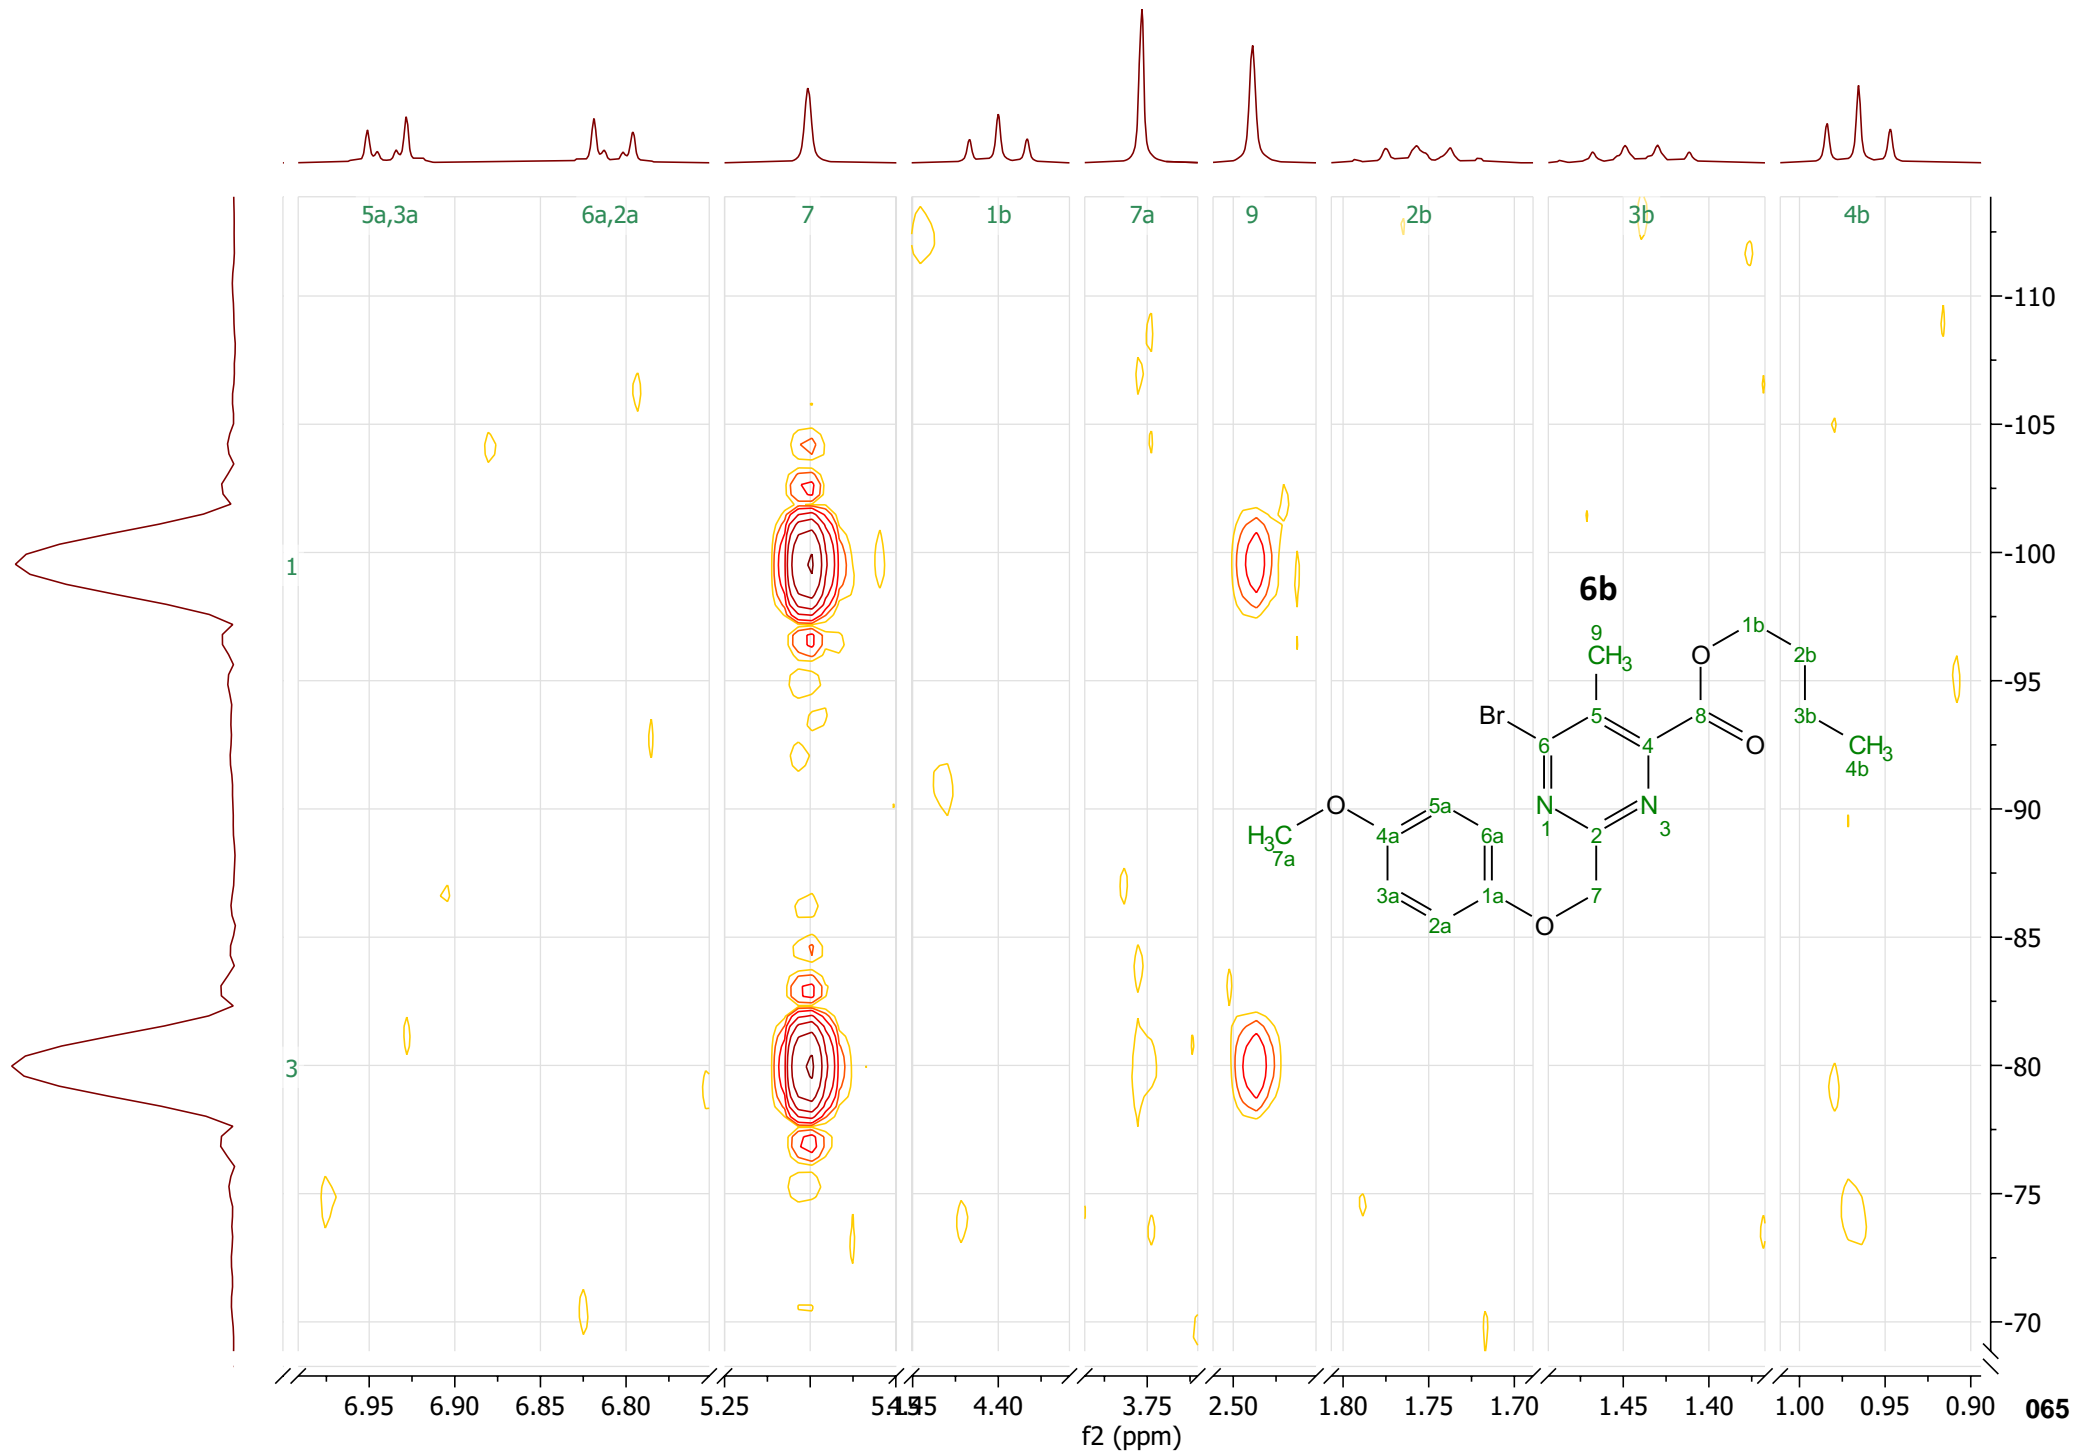

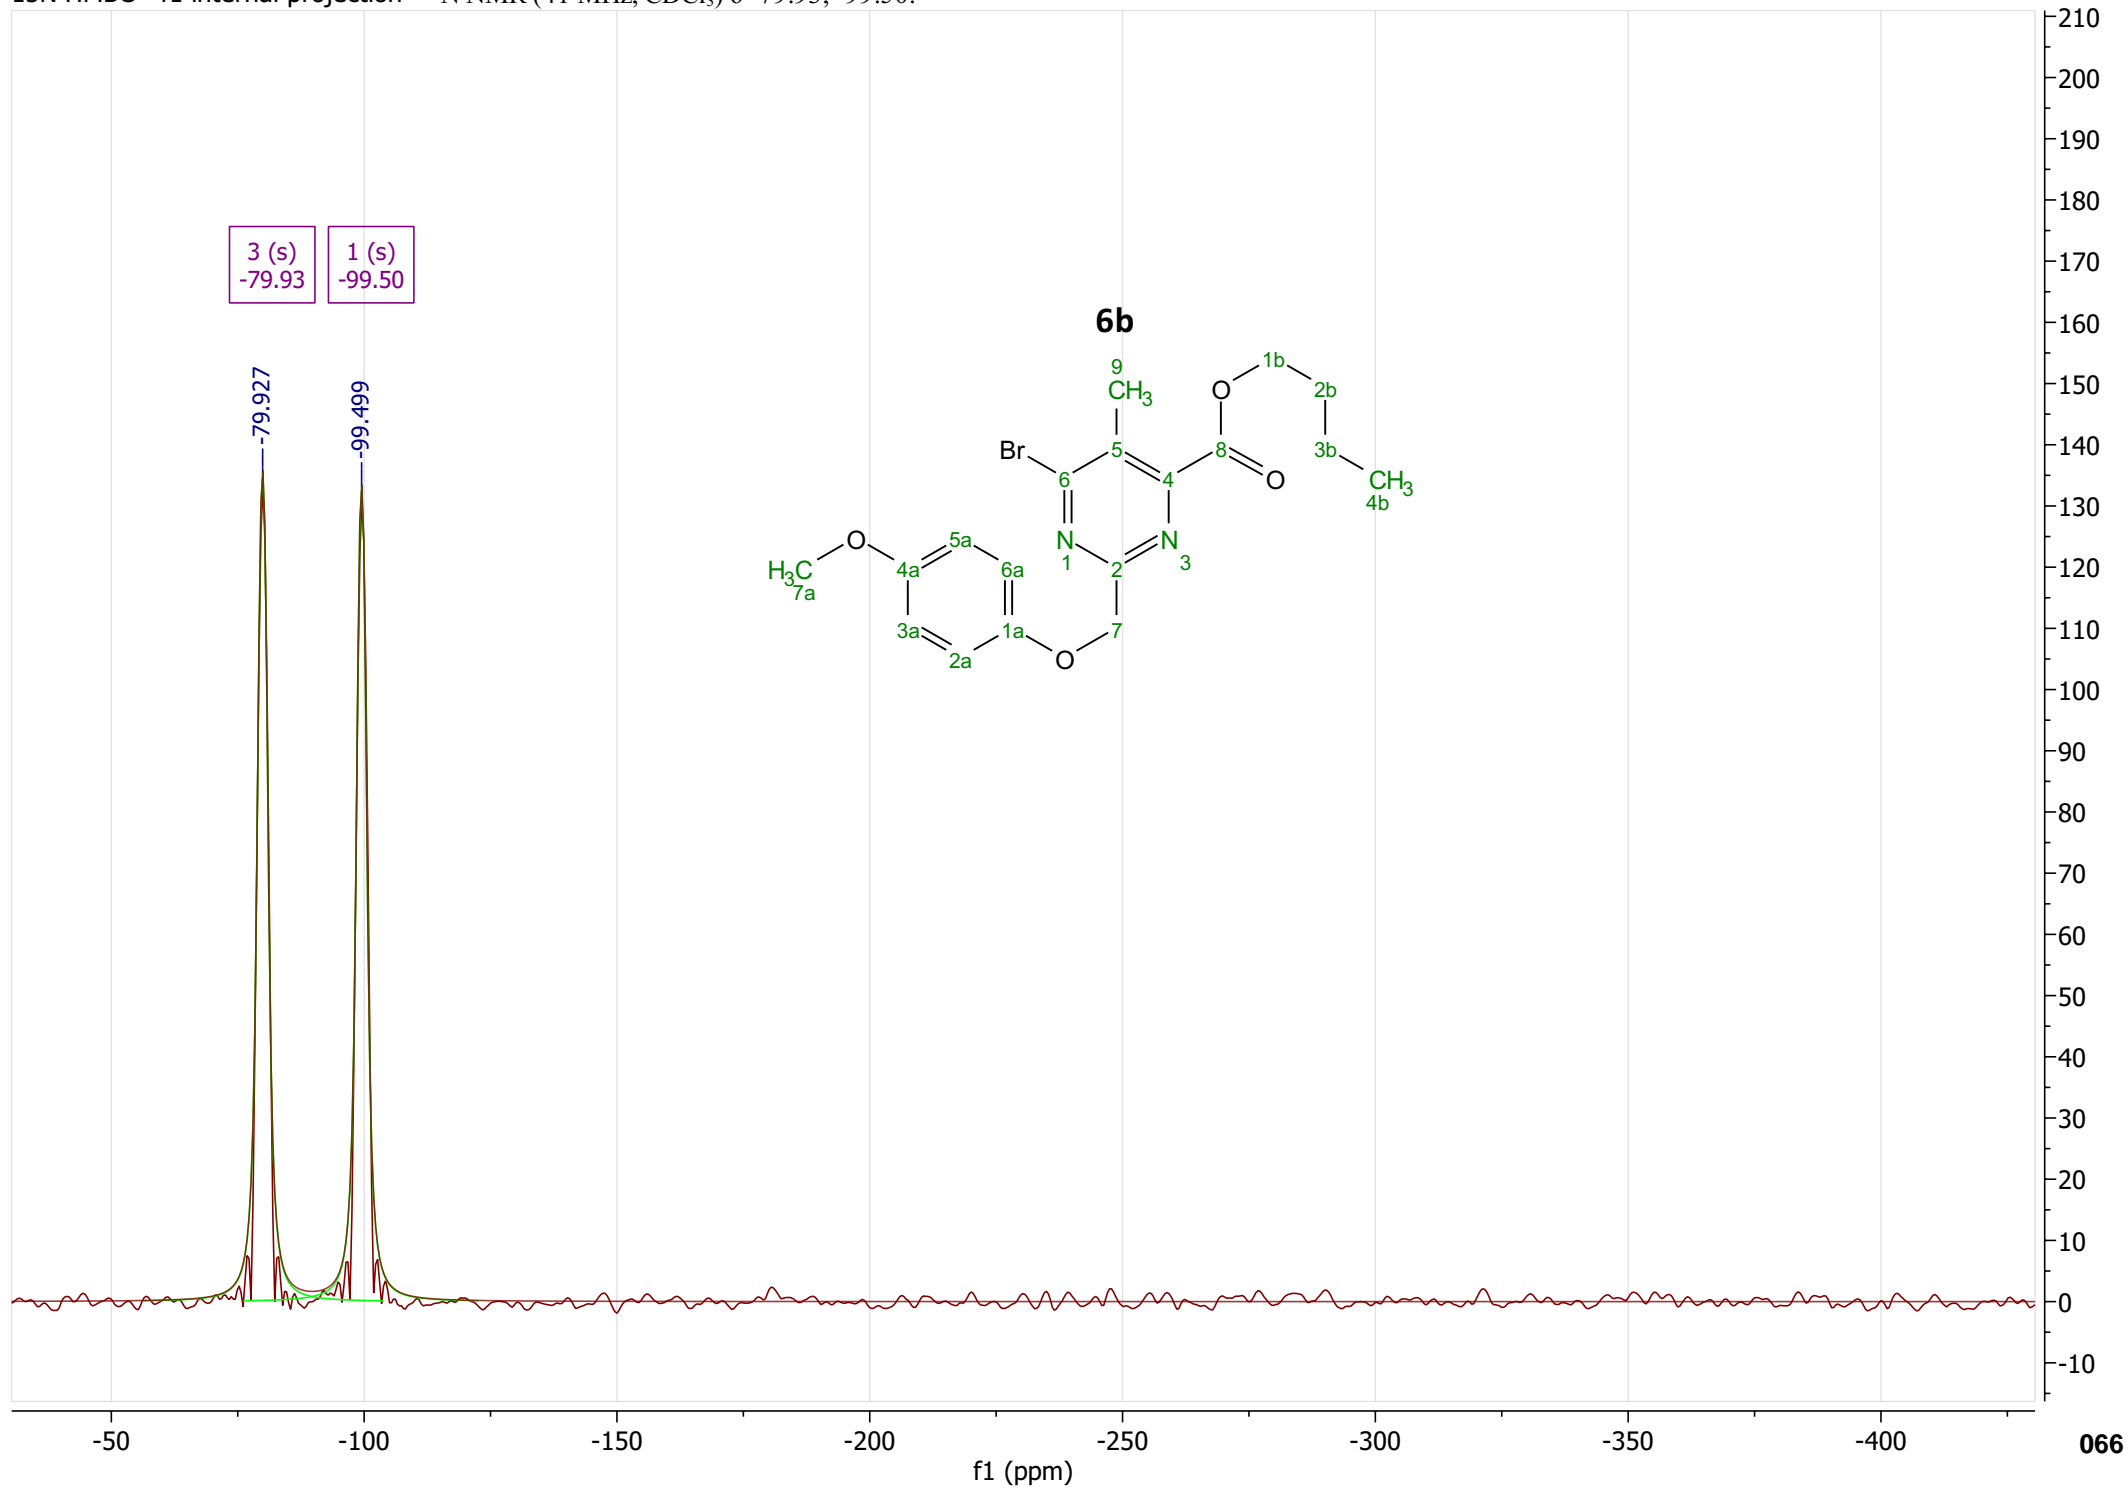

$^1\text{H}$  NMR (400 MHz,  $\text{CDCl}_3$ )  $\delta$  6.99 – 6.88 (m, 2H), 6.88 – 6.73 (m, 2H), 5.20 (s, 2H), 4.39 (t,  $J = 6.8$  Hz, 2H), 3.76 (s, 3H), 2.49 (s, 3H), 1.82 – 1.72 (m, 2H), 1.45 – 1.24 (m, 8H), 0.89 (app t,  $J = 7.0$  Hz, 3H).

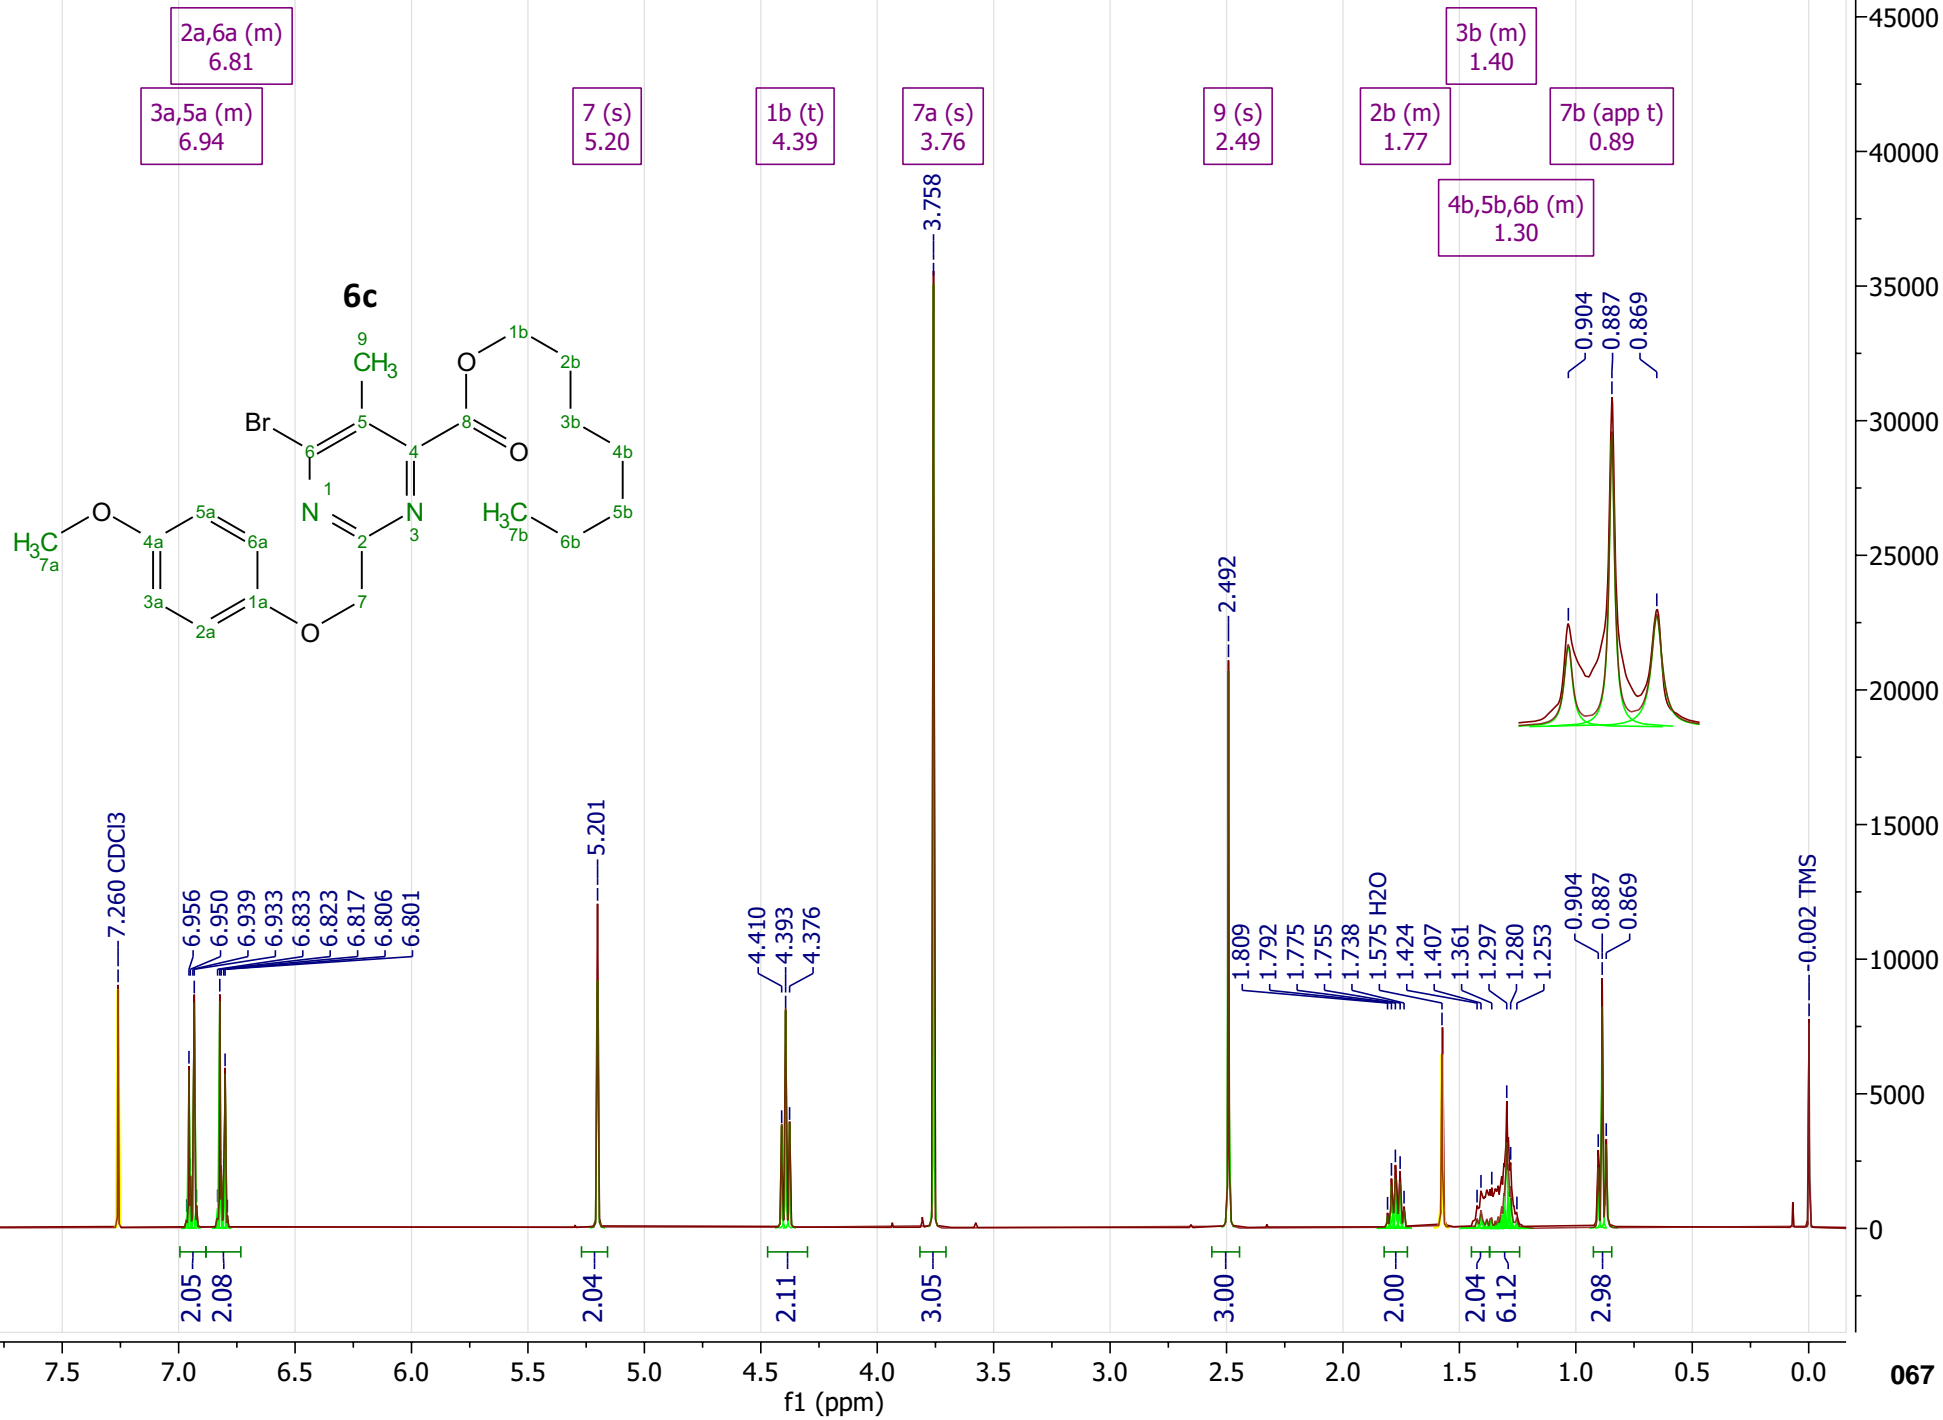

<sup>13</sup>C NMR (101 MHz, CDCl<sub>3</sub>) δ 164.7, 164.1, 158.2, 157.0, 154.5, 152.6, 130.1, 116.4 (sym, 2C), 114.7 (sym, 2C), 70.9, 67.0, 55.8, 31.8, 29.0, 28.6, 25.9, 22.7, 17.8, 14.2.

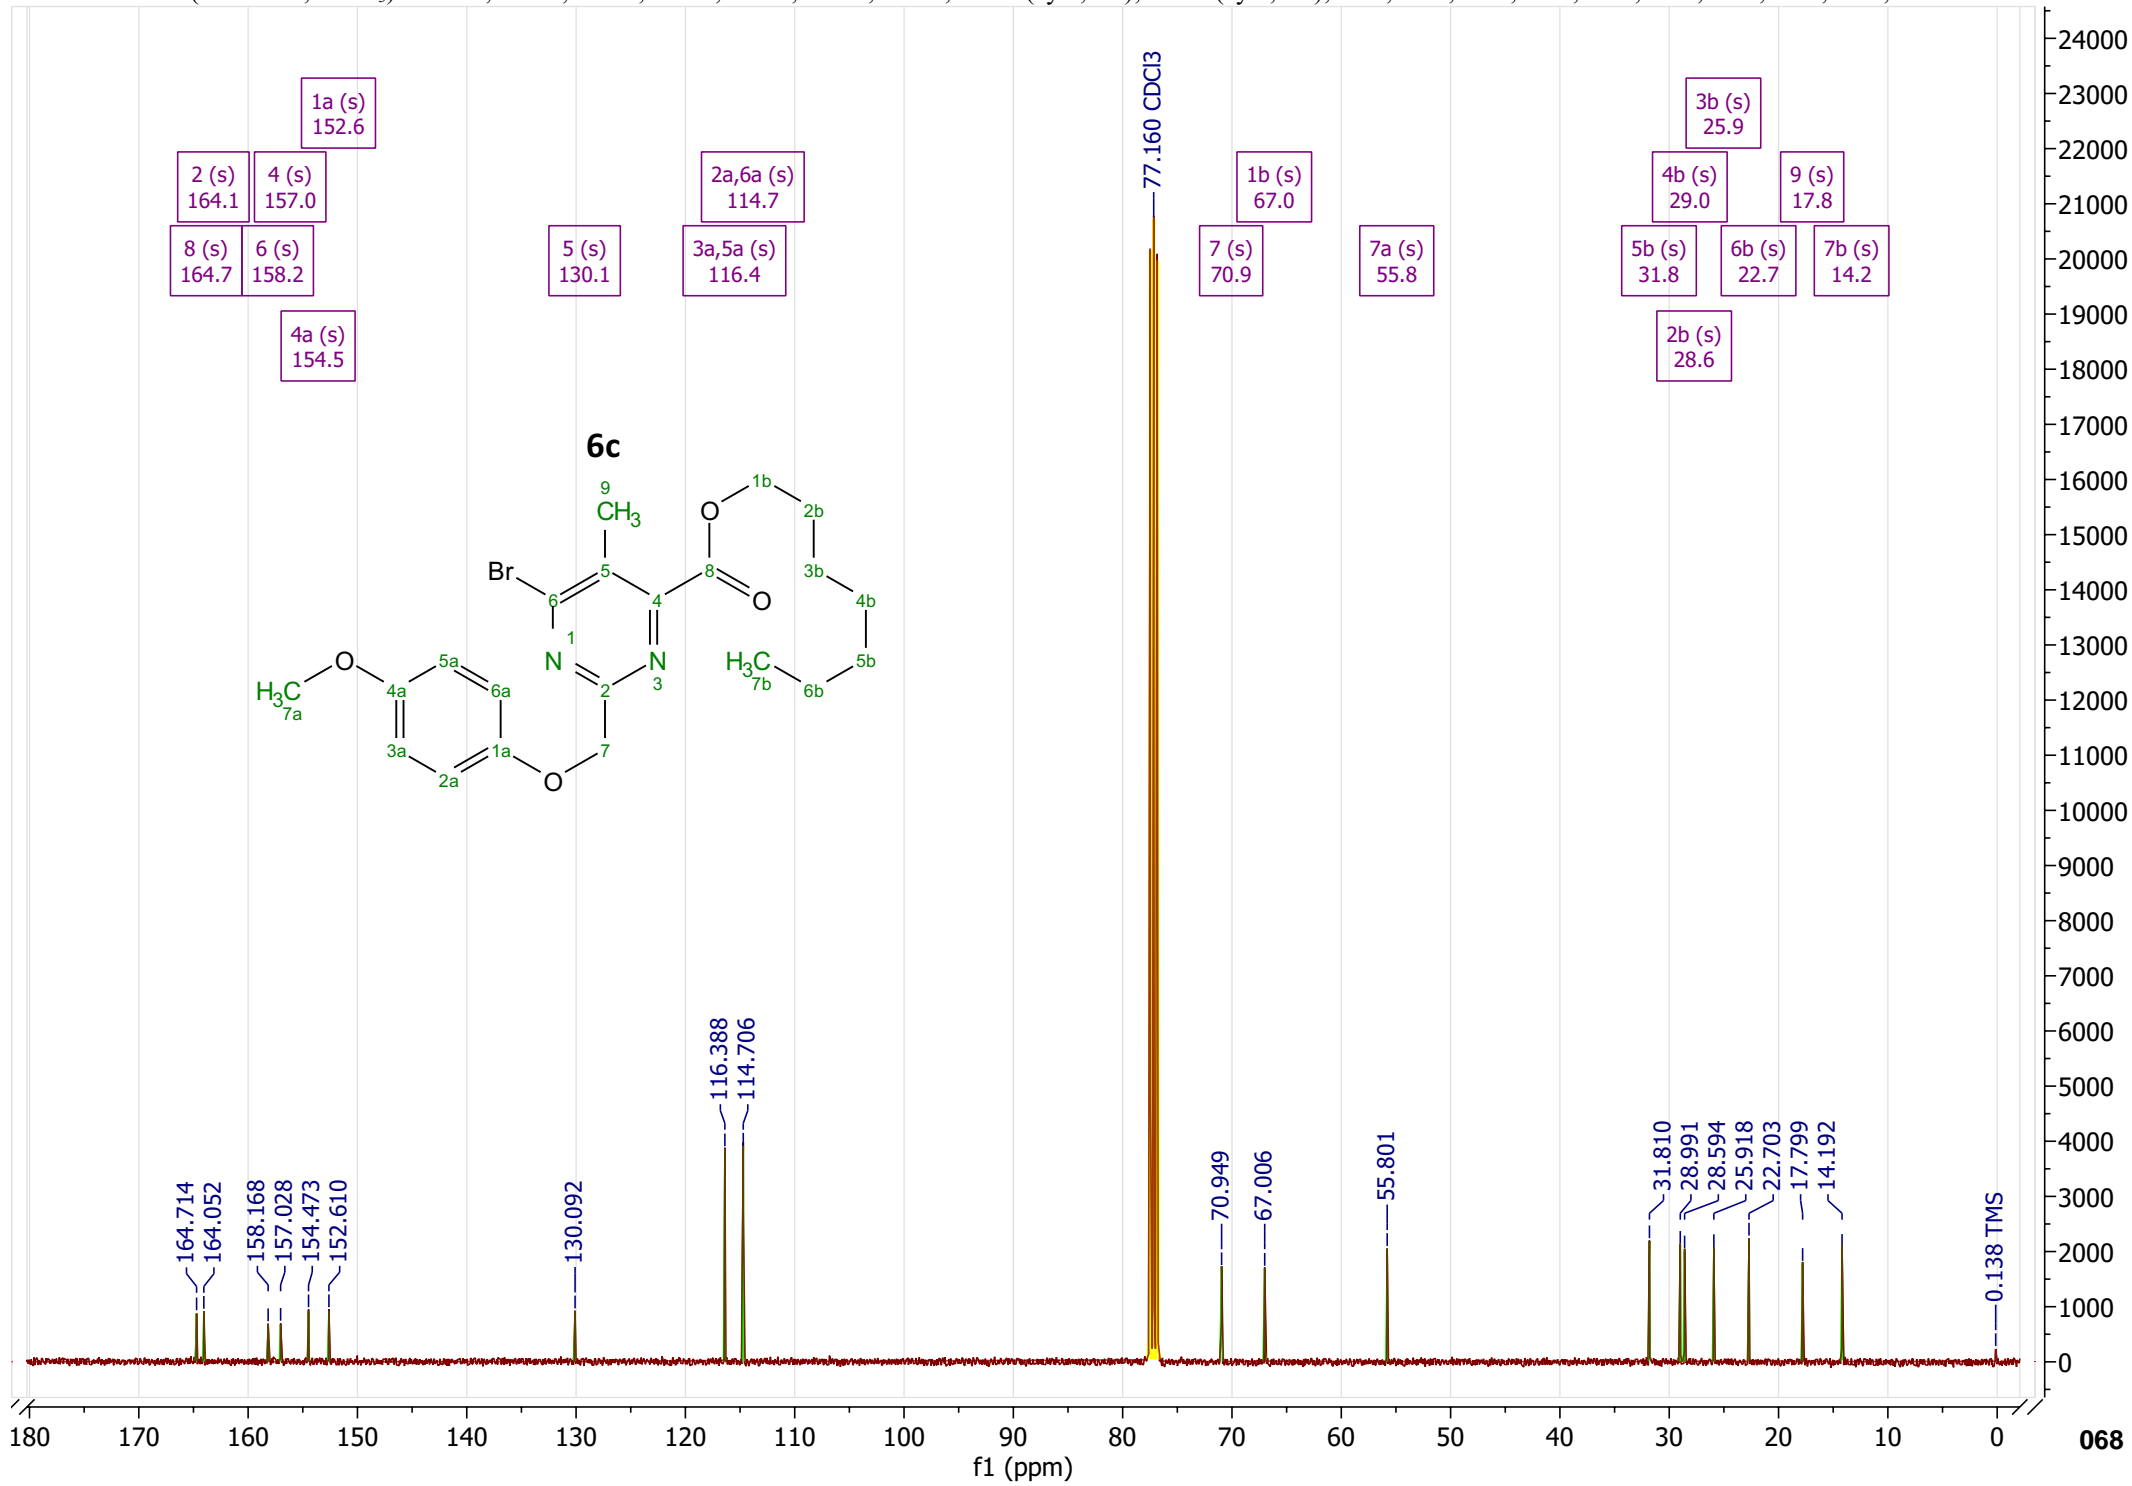

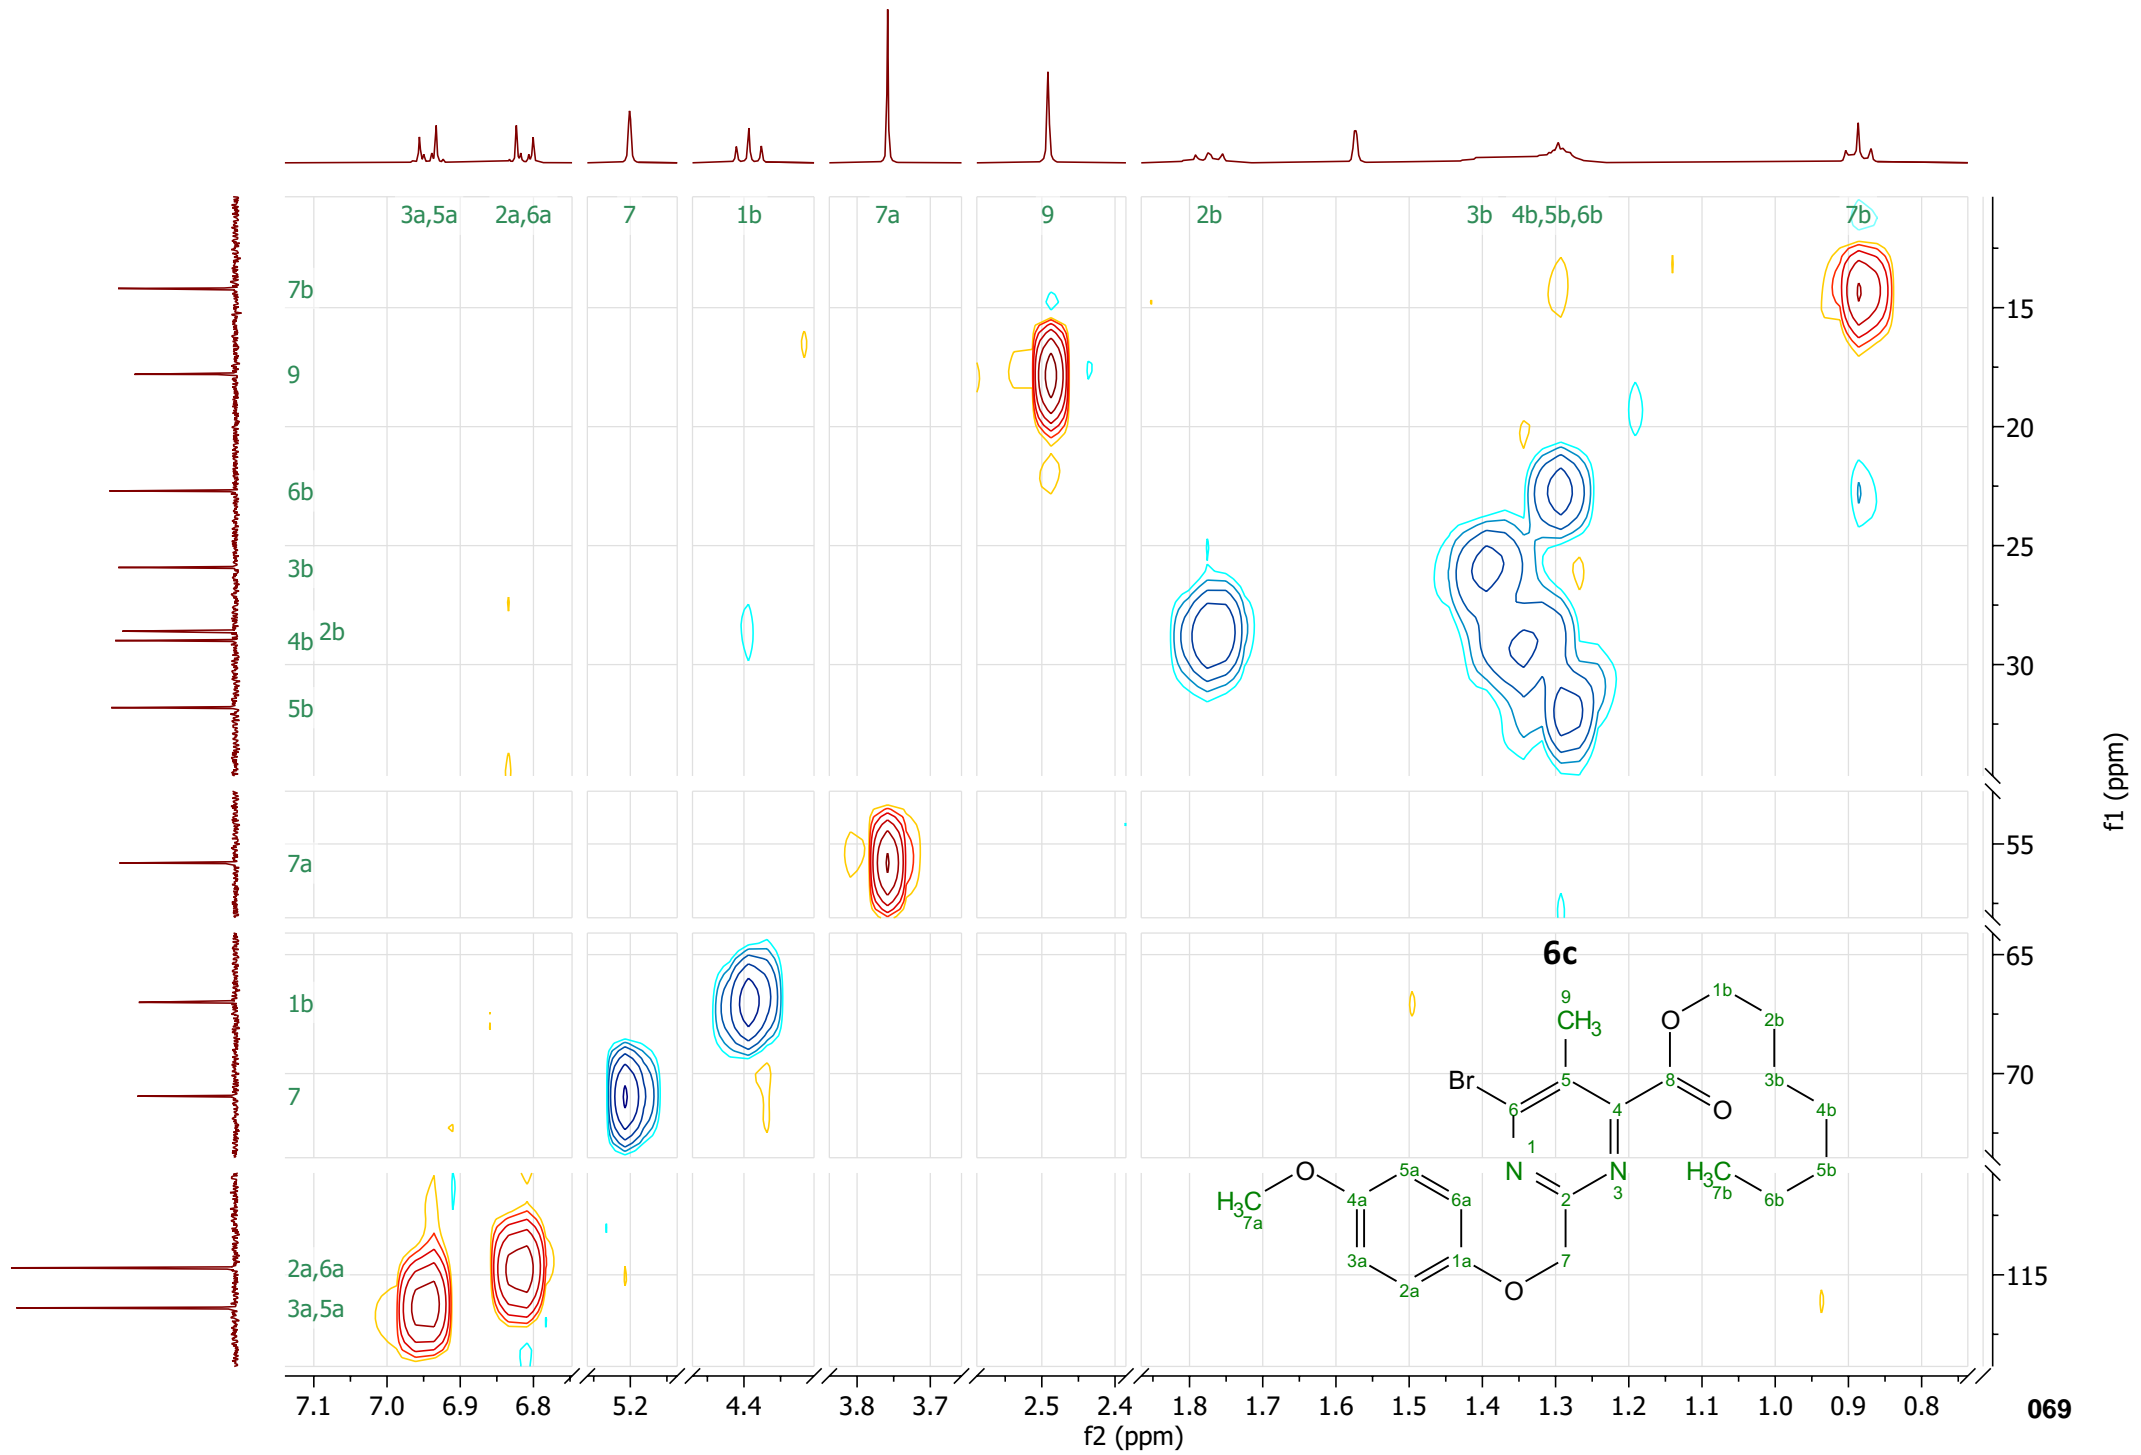

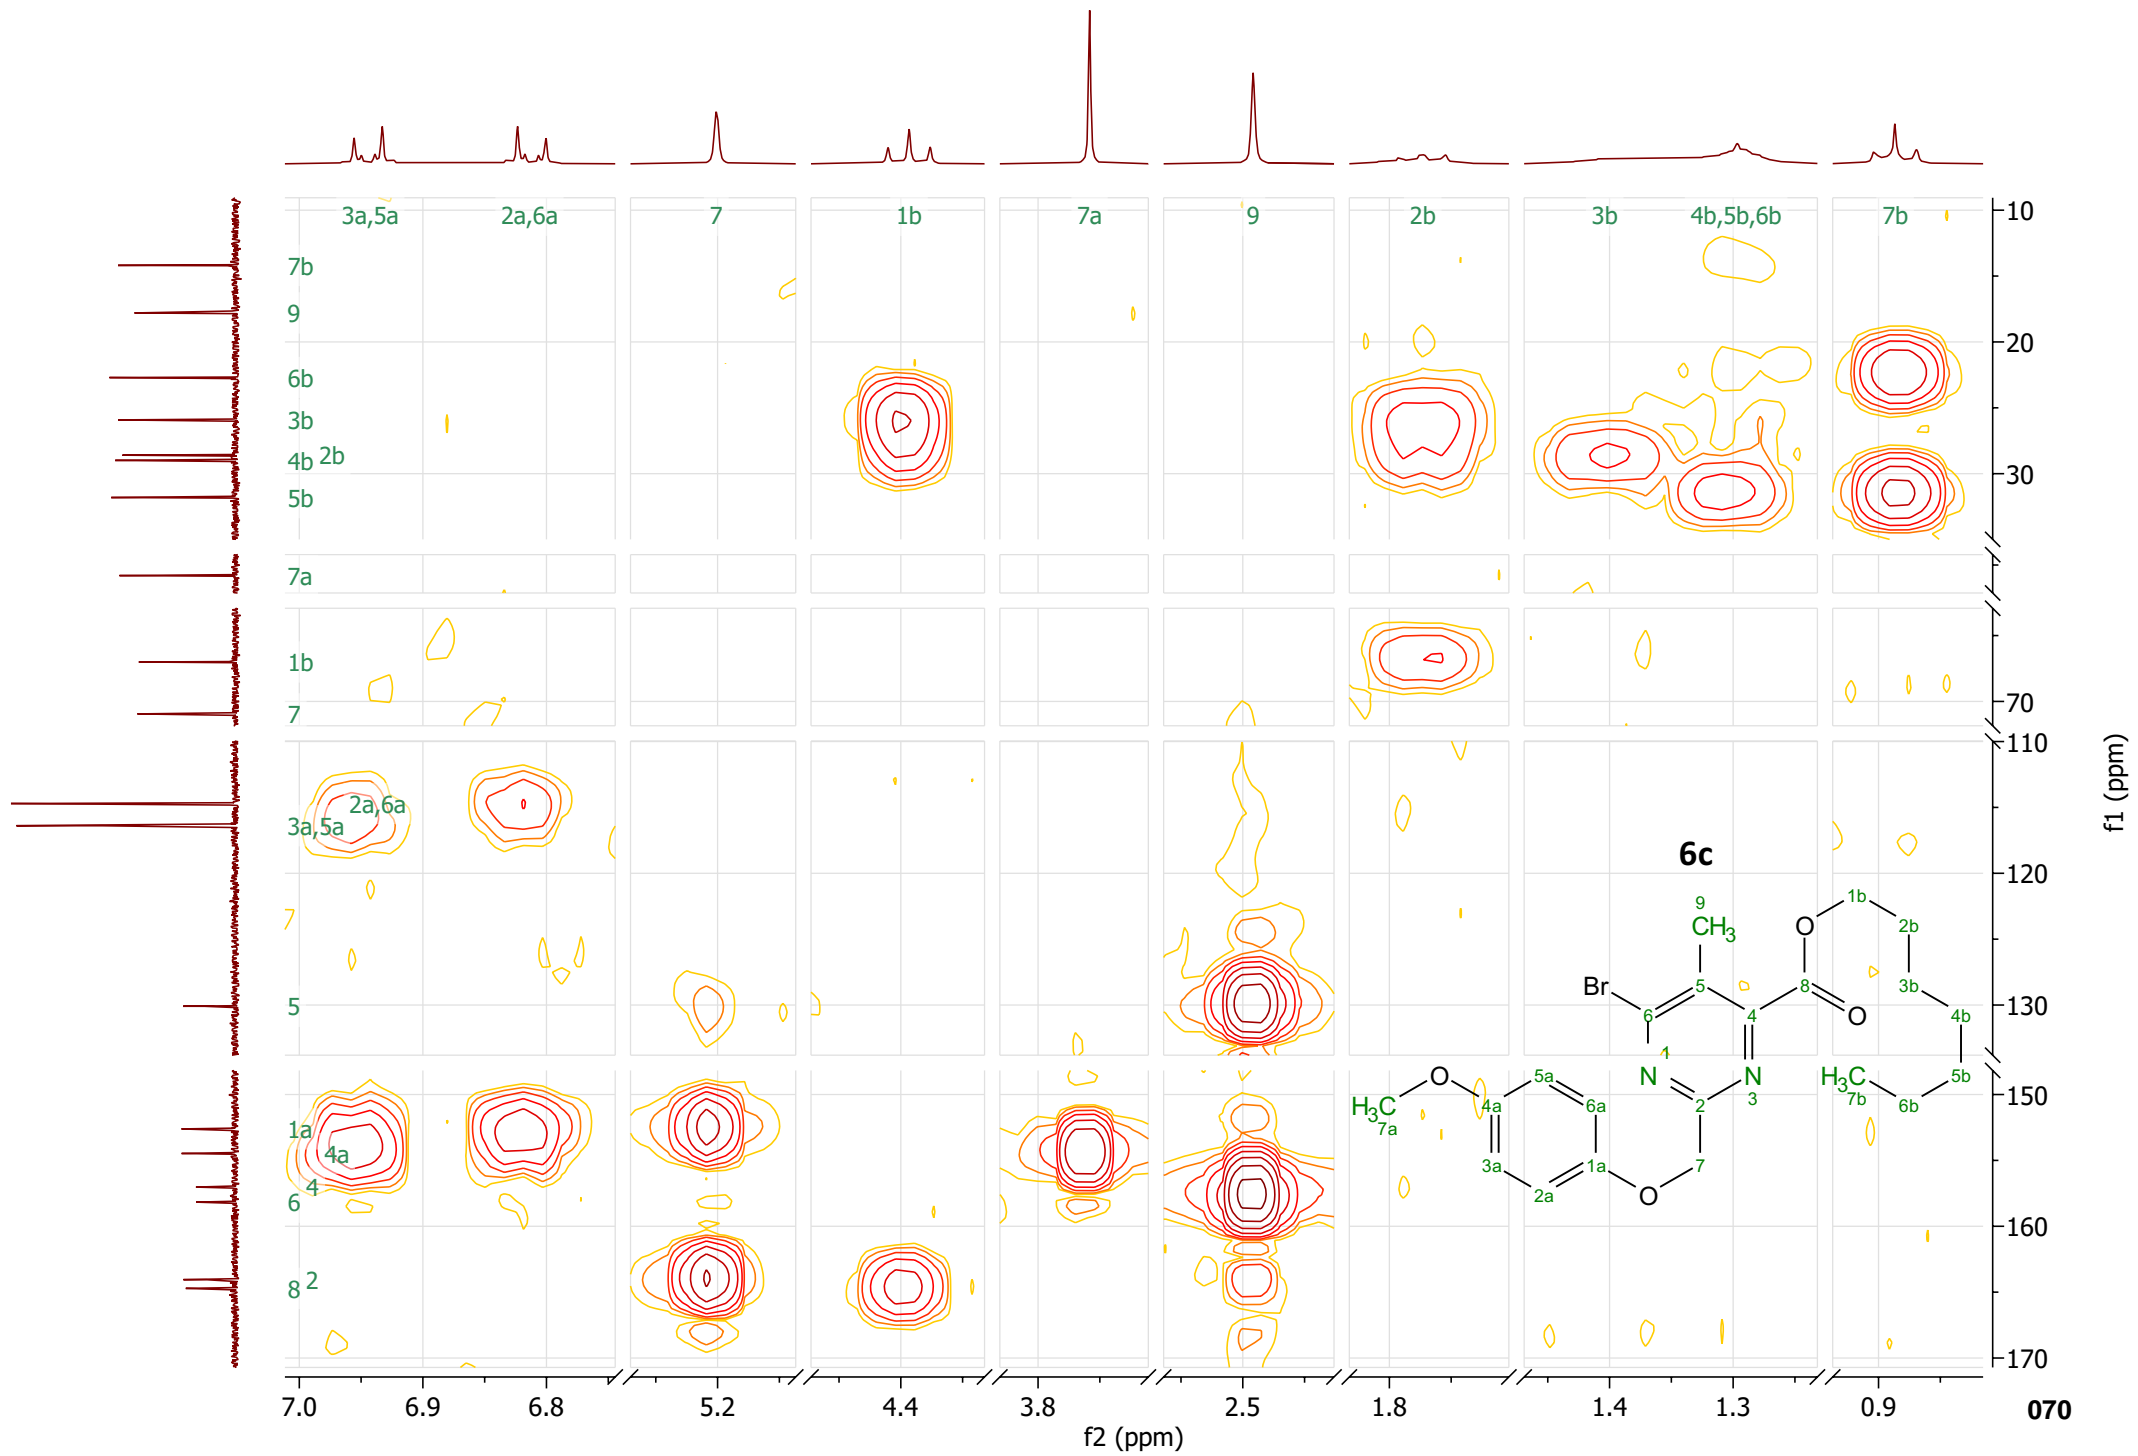

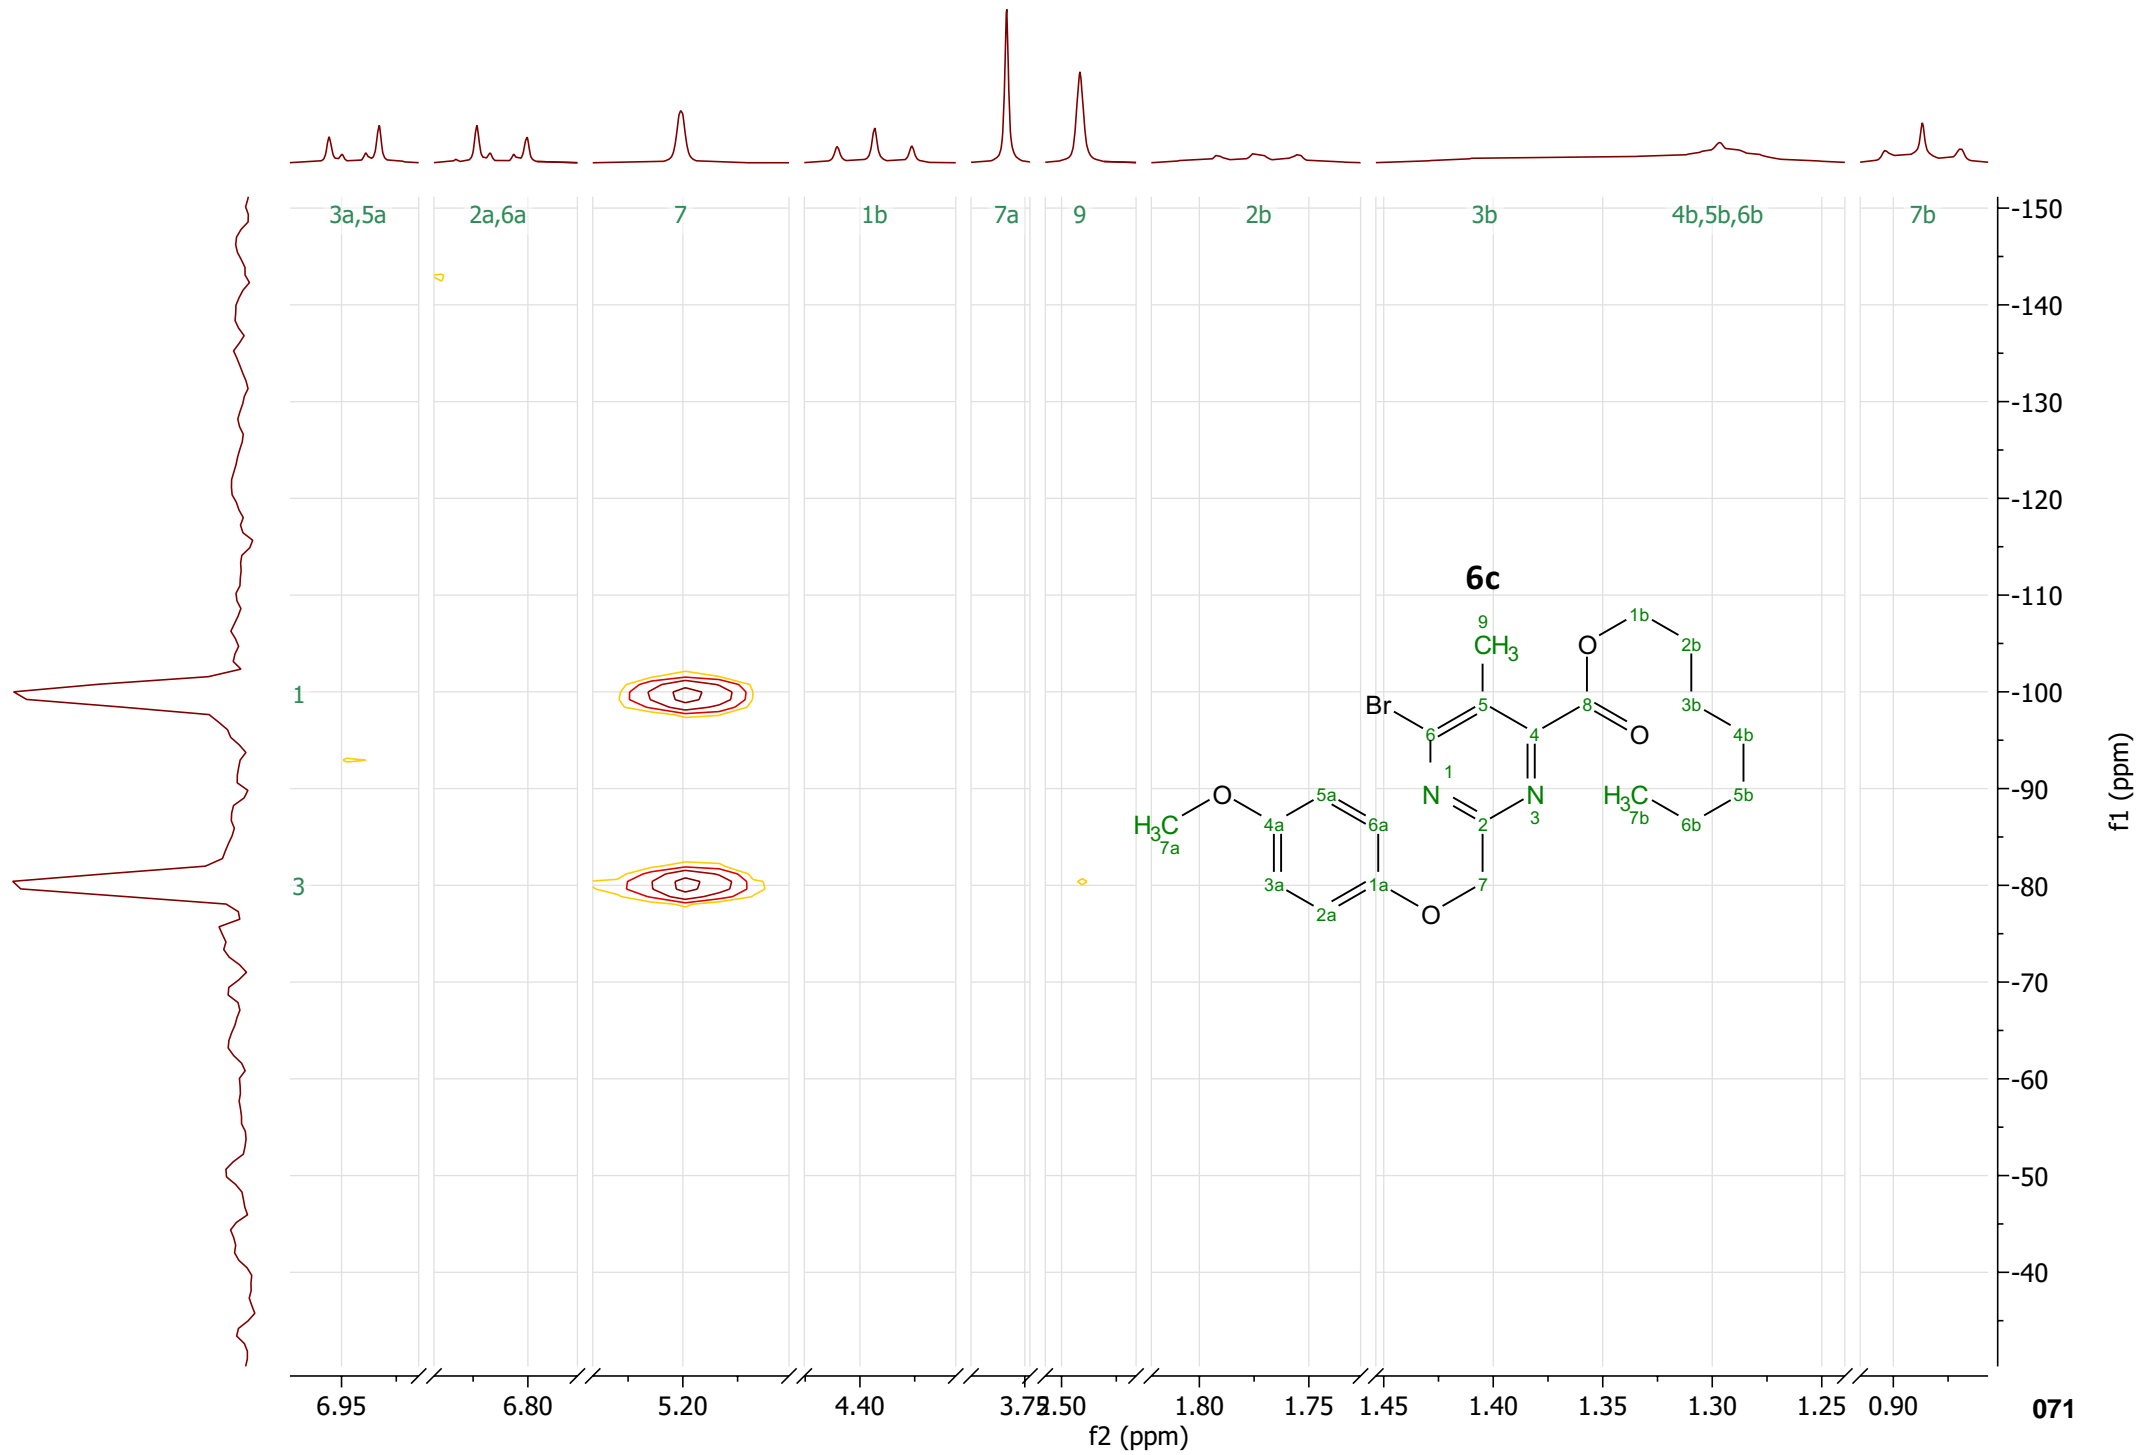

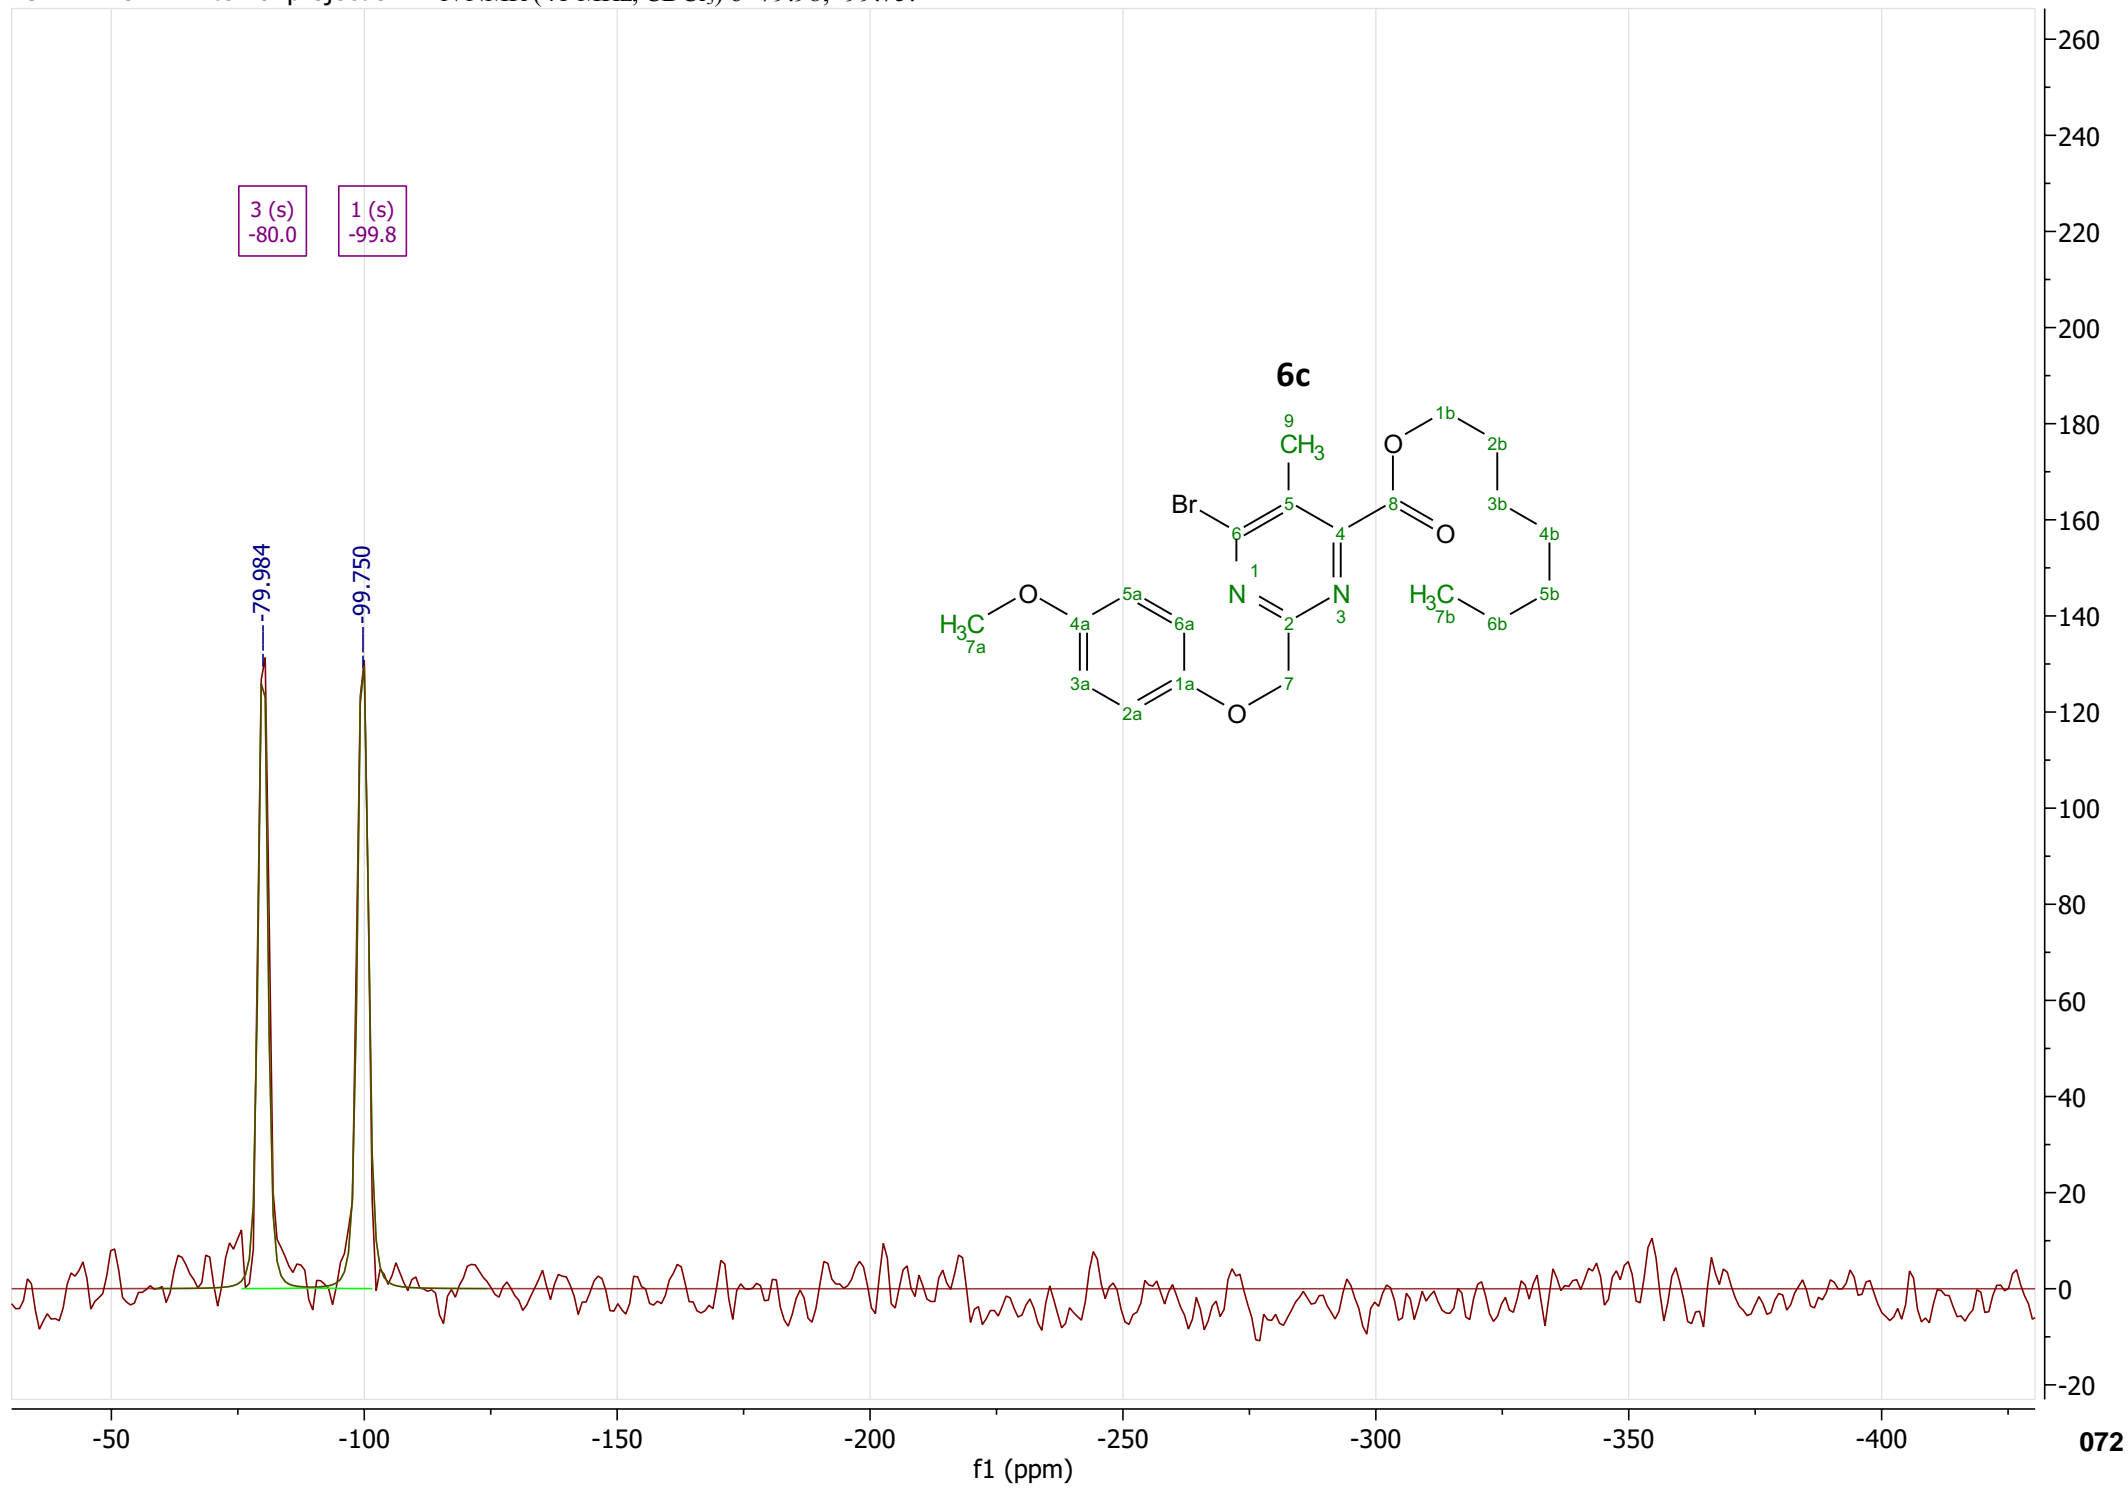



$^1\text{H}$  NMR (400 MHz,  $\text{CDCl}_3$ )  $\delta$  7.04 – 6.85 (m, 2H), 6.85 – 6.68 (m, 2H), 5.20 (s, 2H), 4.39 (t,  $J = 6.8$  Hz, 2H), 3.75 (s, 3H), 2.49 (s, 3H), 1.88 – 1.68 (m, 2H), 1.48 – 1.37 (m, 2H), 1.37 – 1.16 (m, 8H), 0.88 (app t,  $J = 7.0$  Hz, 3H).

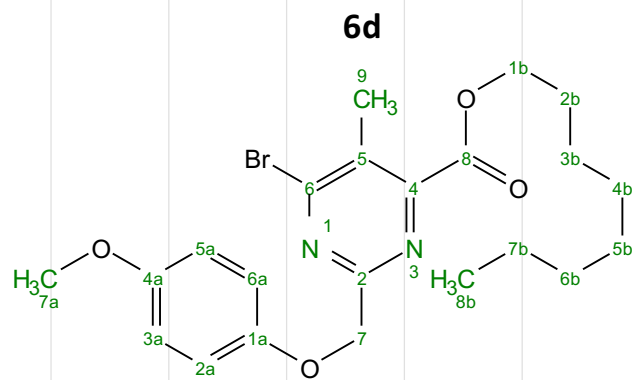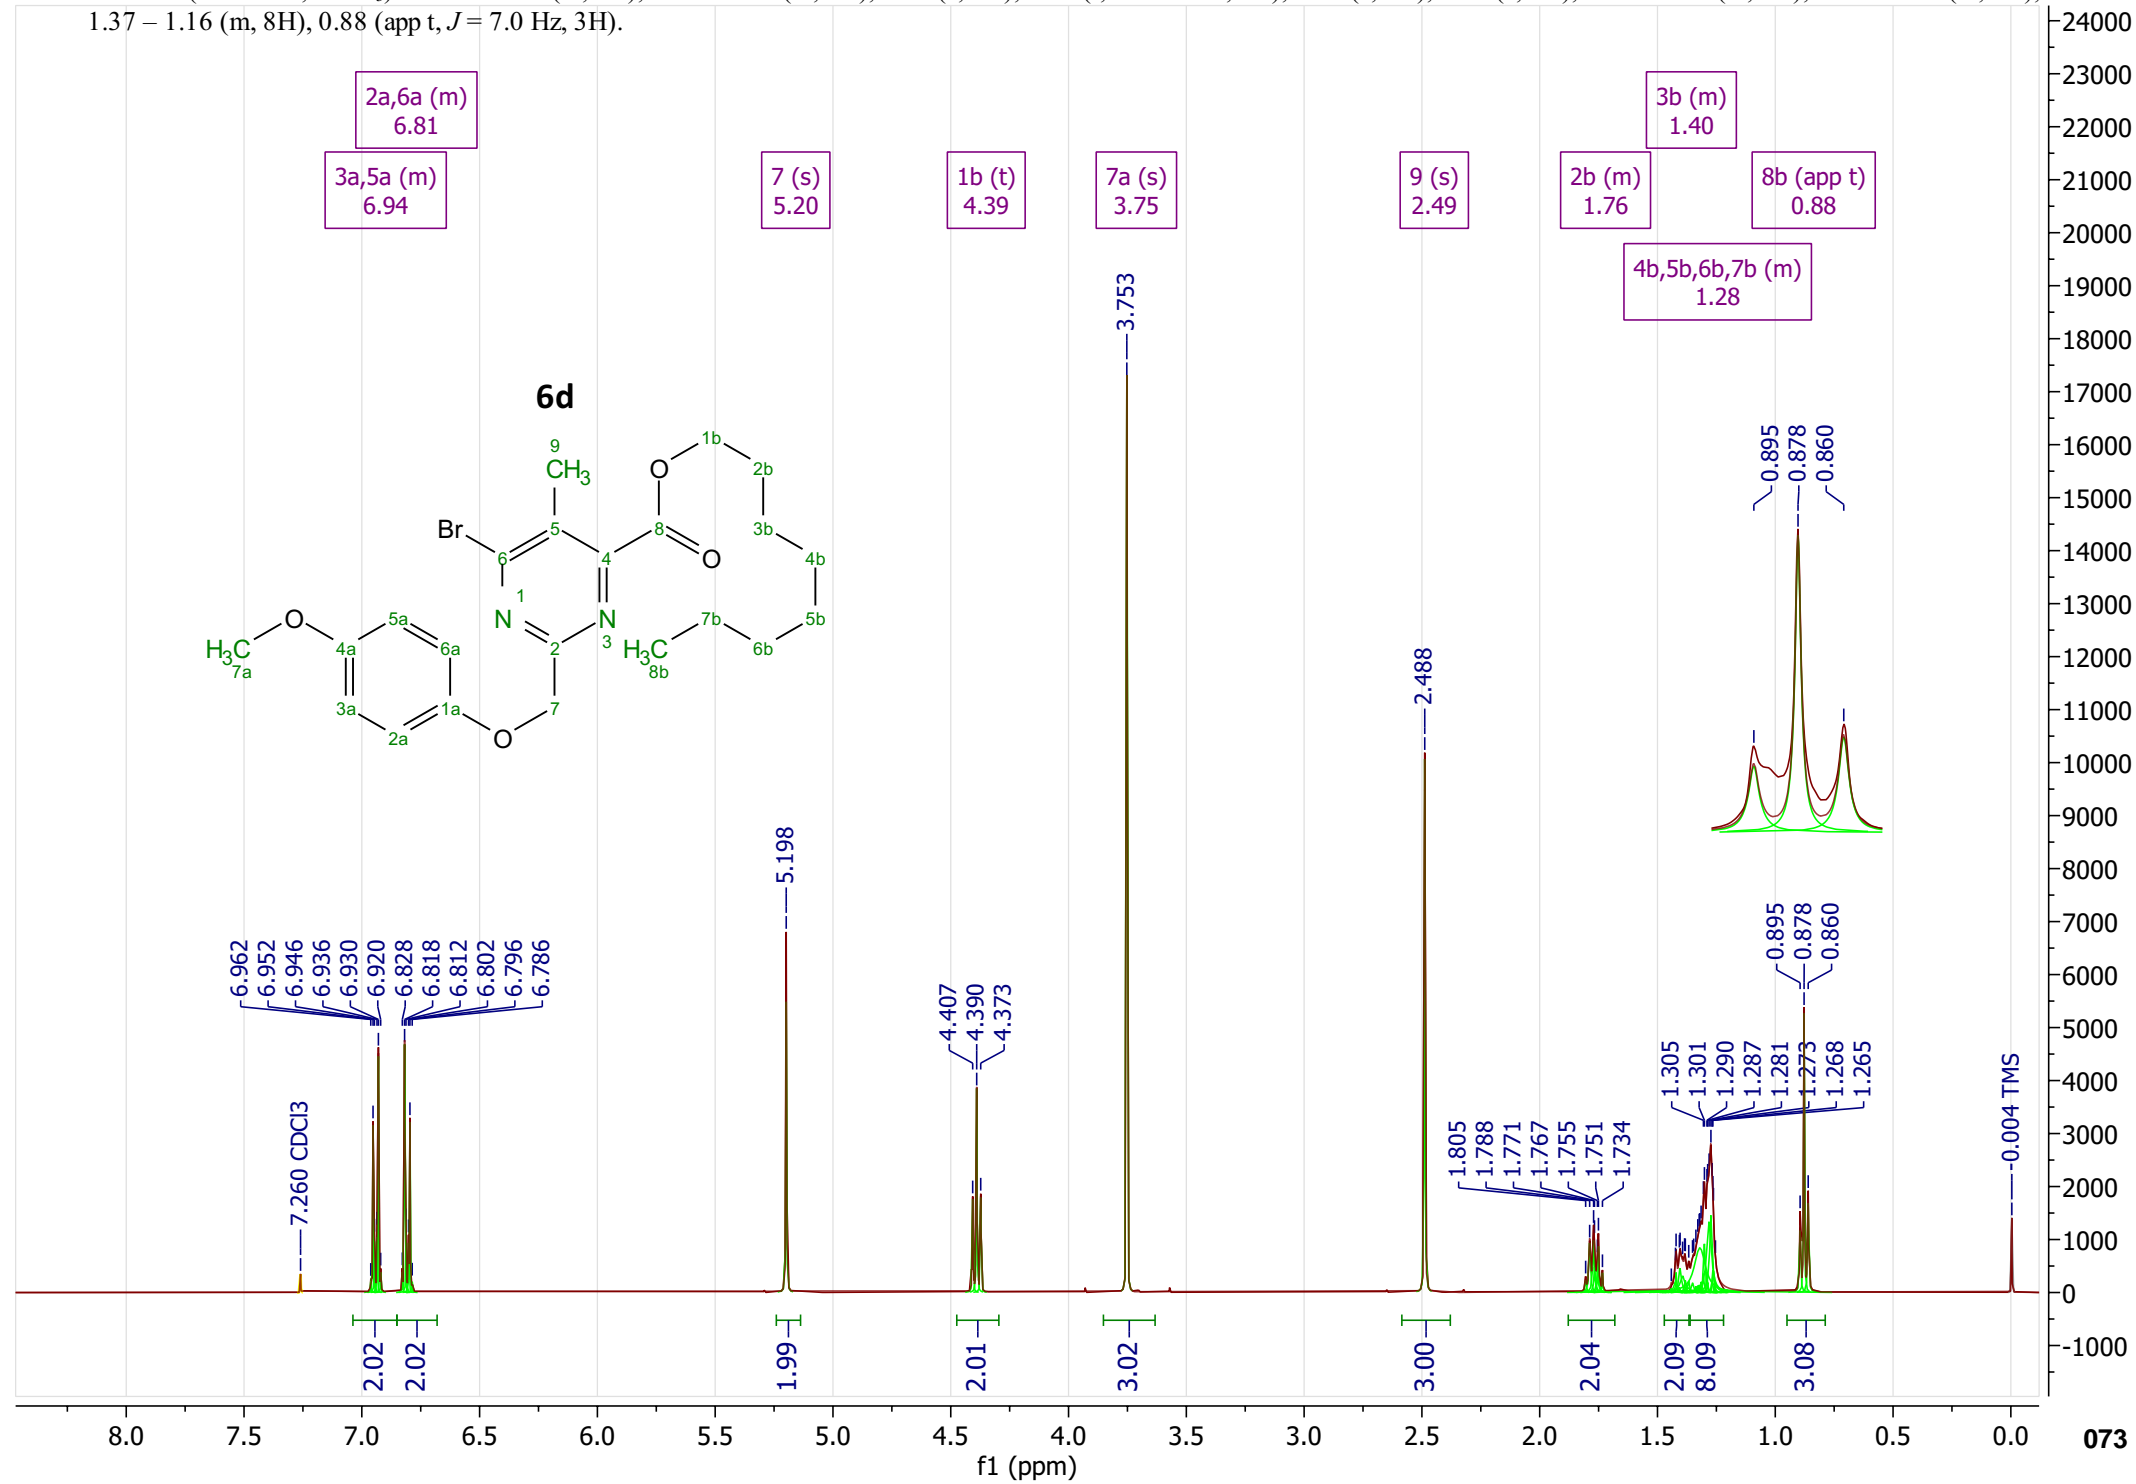

<sup>13</sup>C NMR (101 MHz, CDCl<sub>3</sub>) δ 164.7, 164.0, 158.2, 157.0, 154.5, 152.6, 130.1, 116.4 (sym, 2C), 114.7 (sym, 2C), 70.9, 67.0, 55.8, 31.9, 29.3 (2C), 28.6, 26.0, 22.8, 17.8, 14.2.

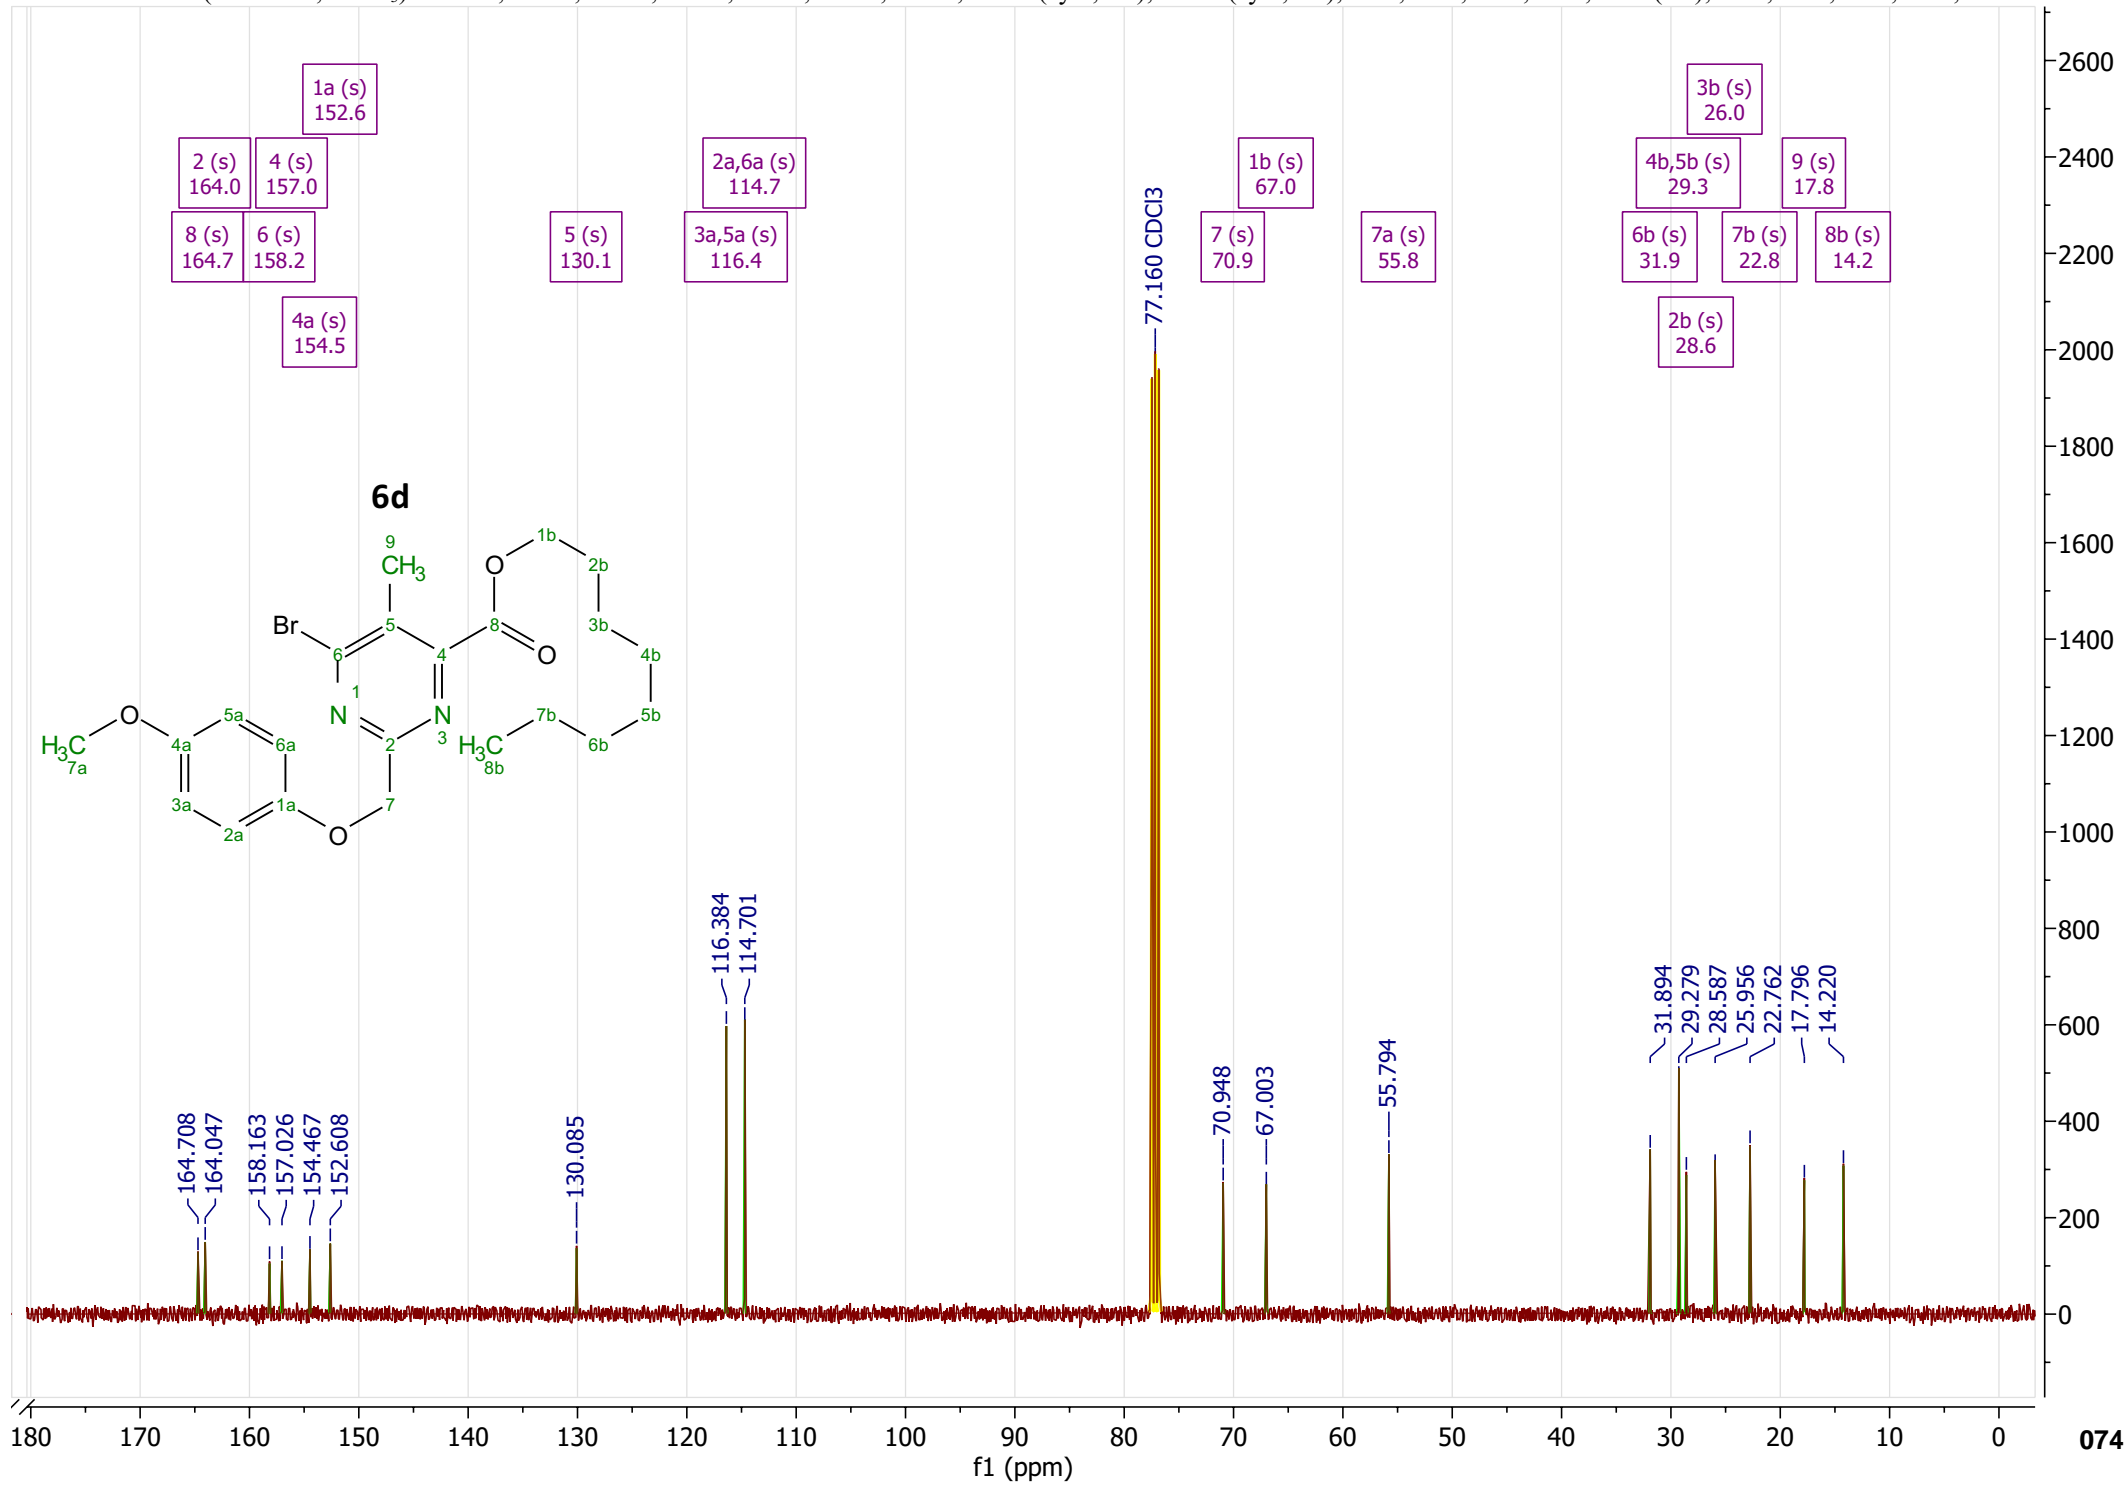

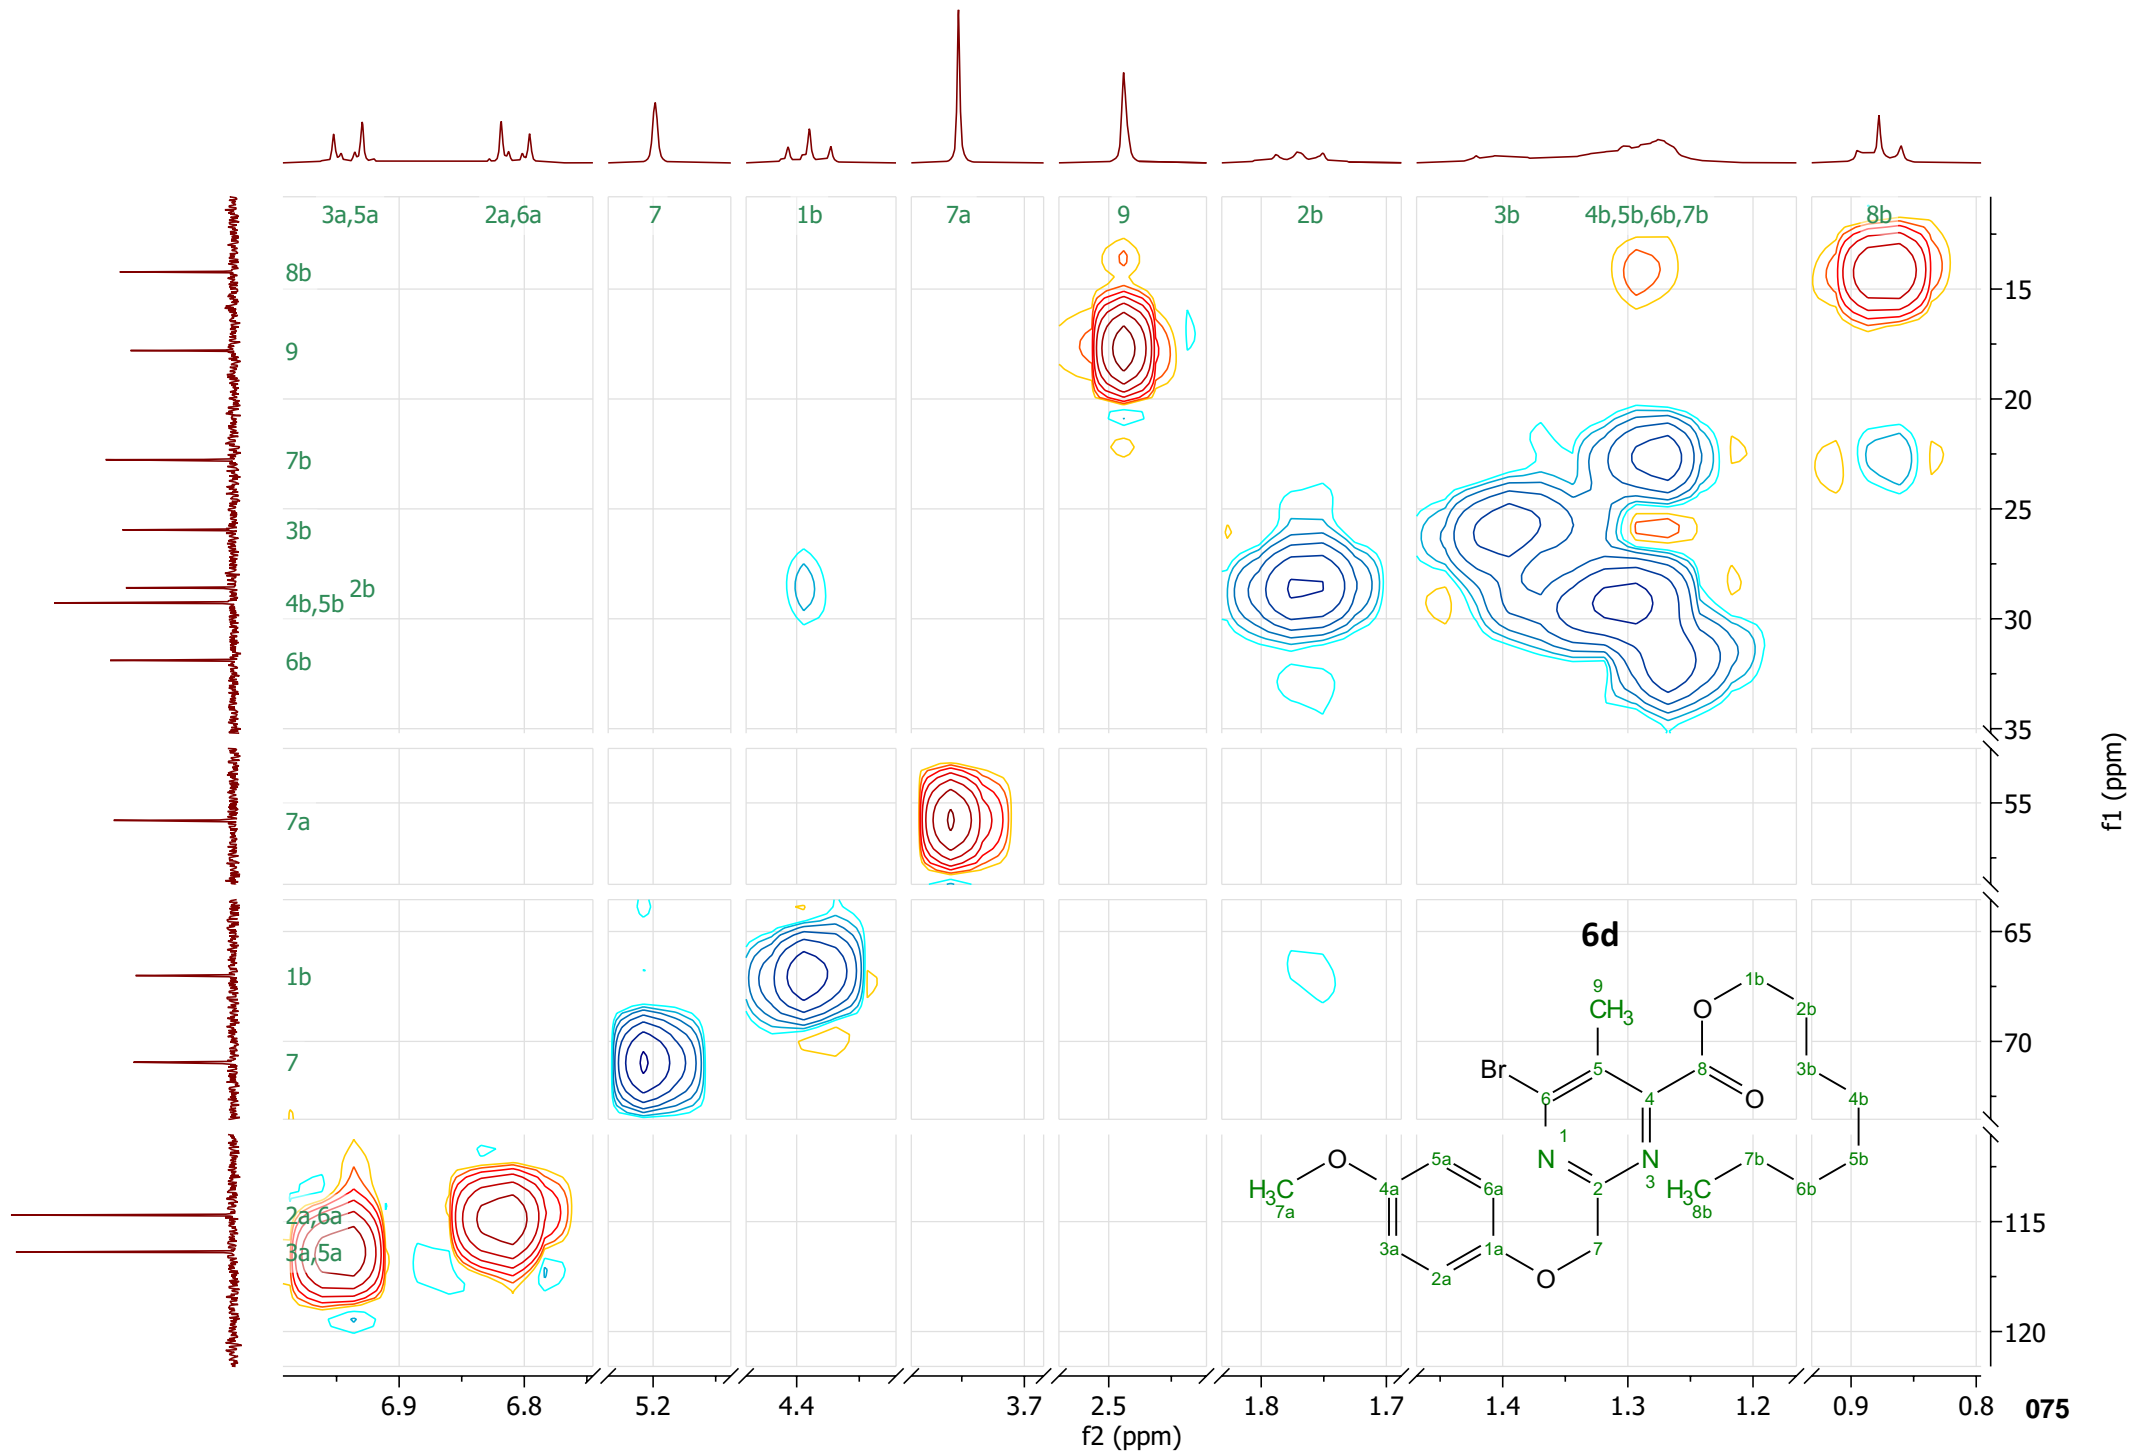

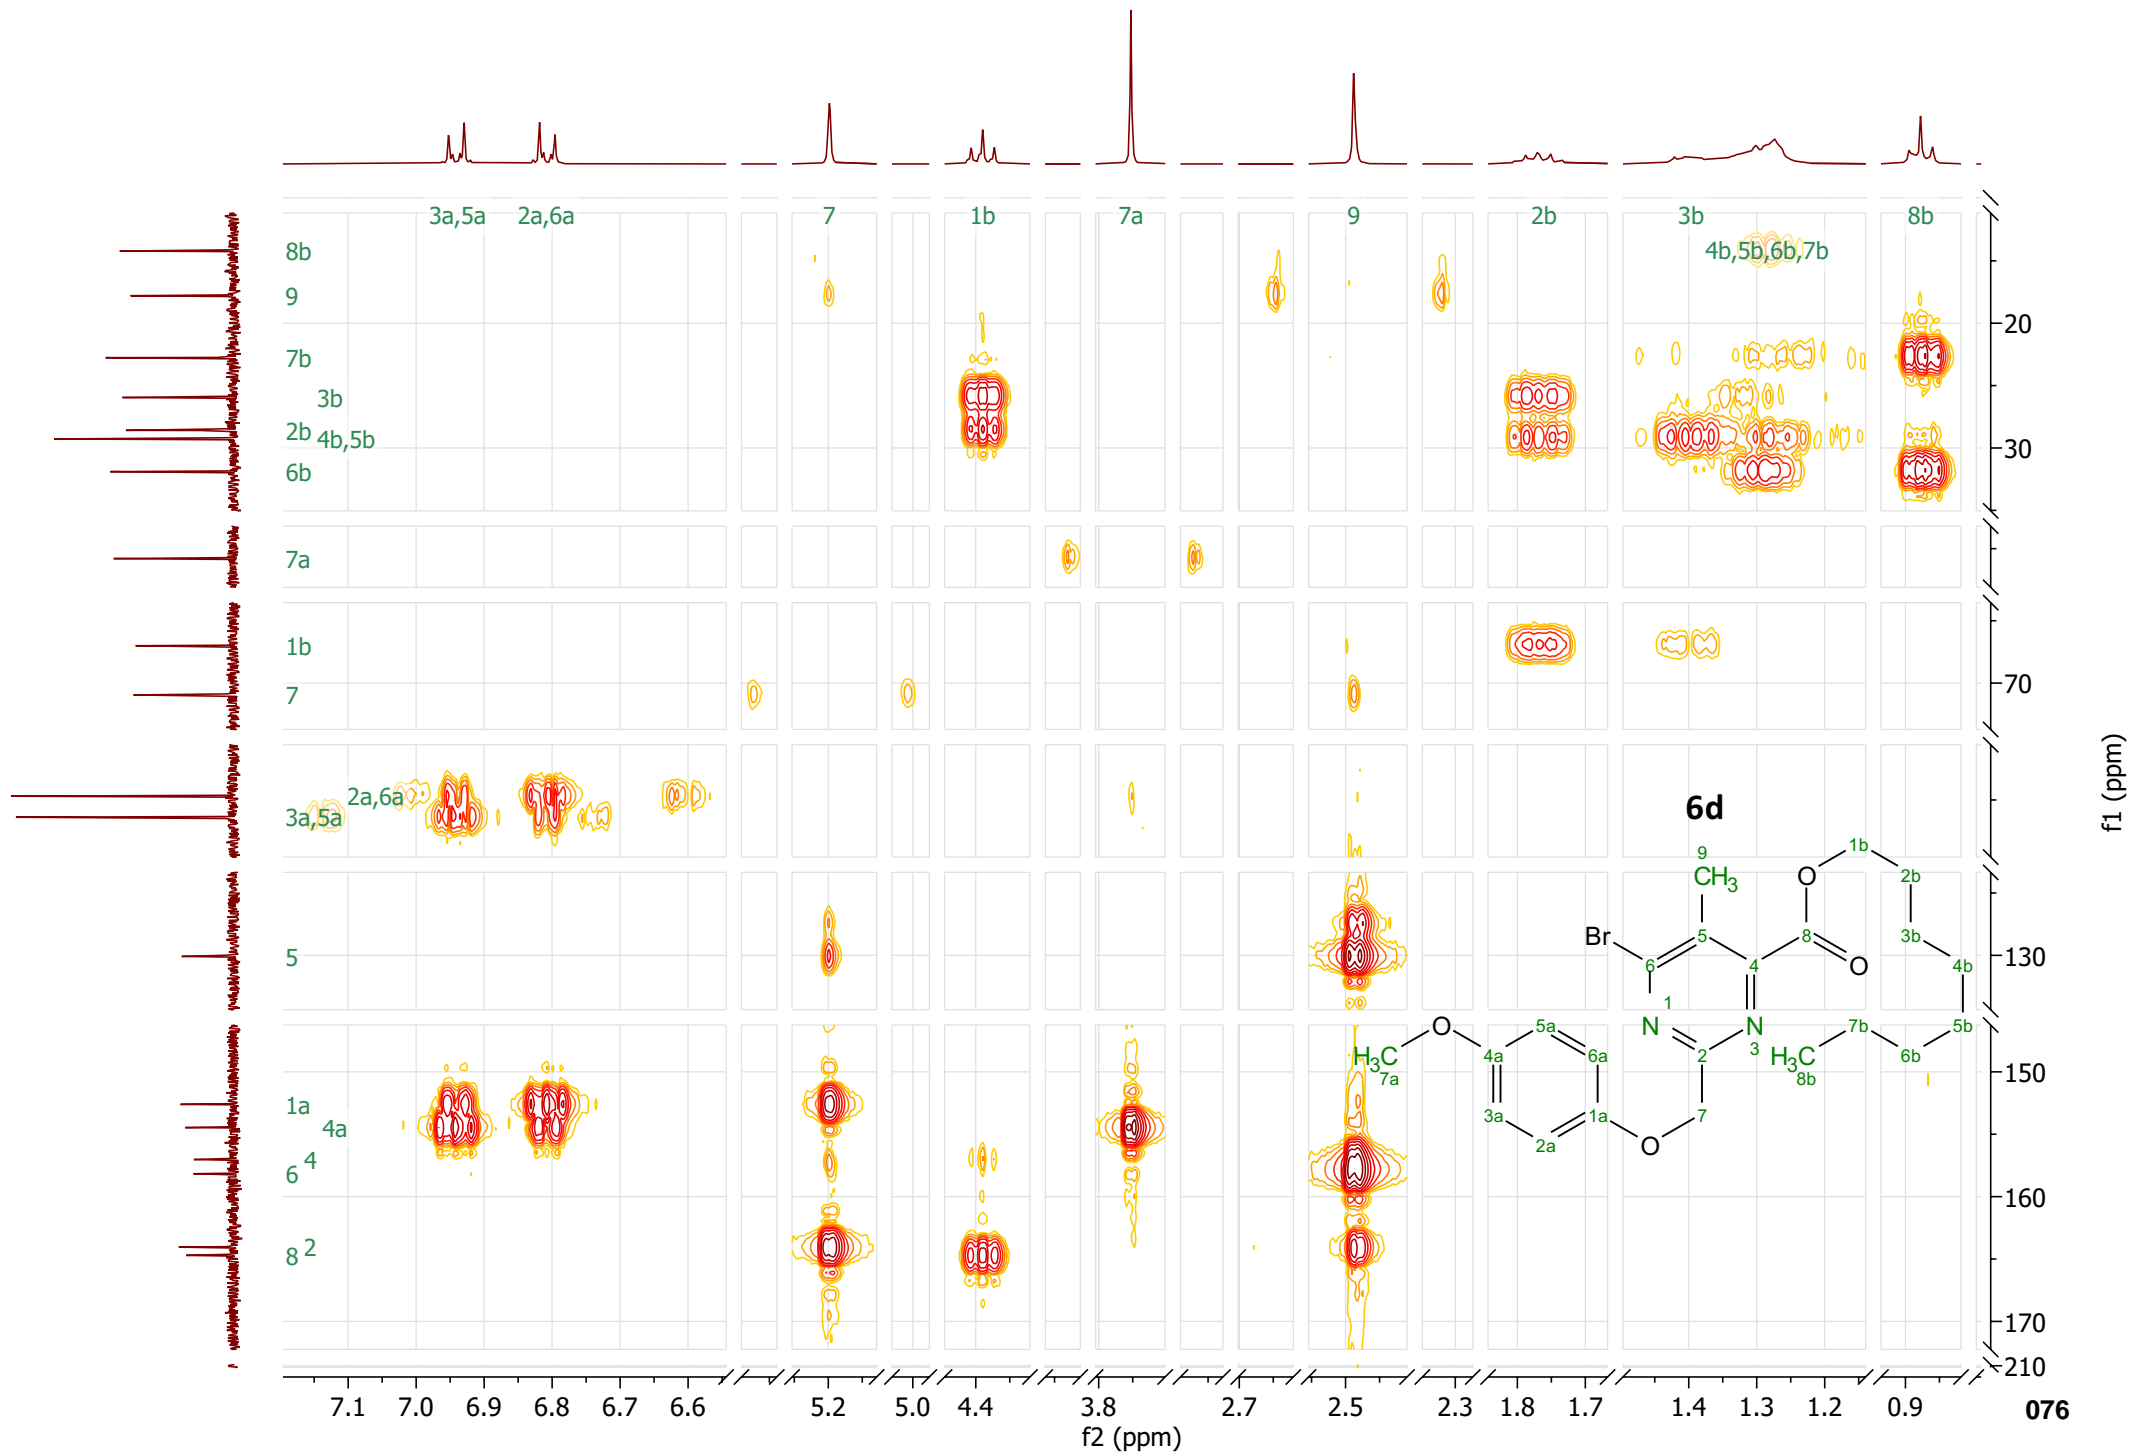

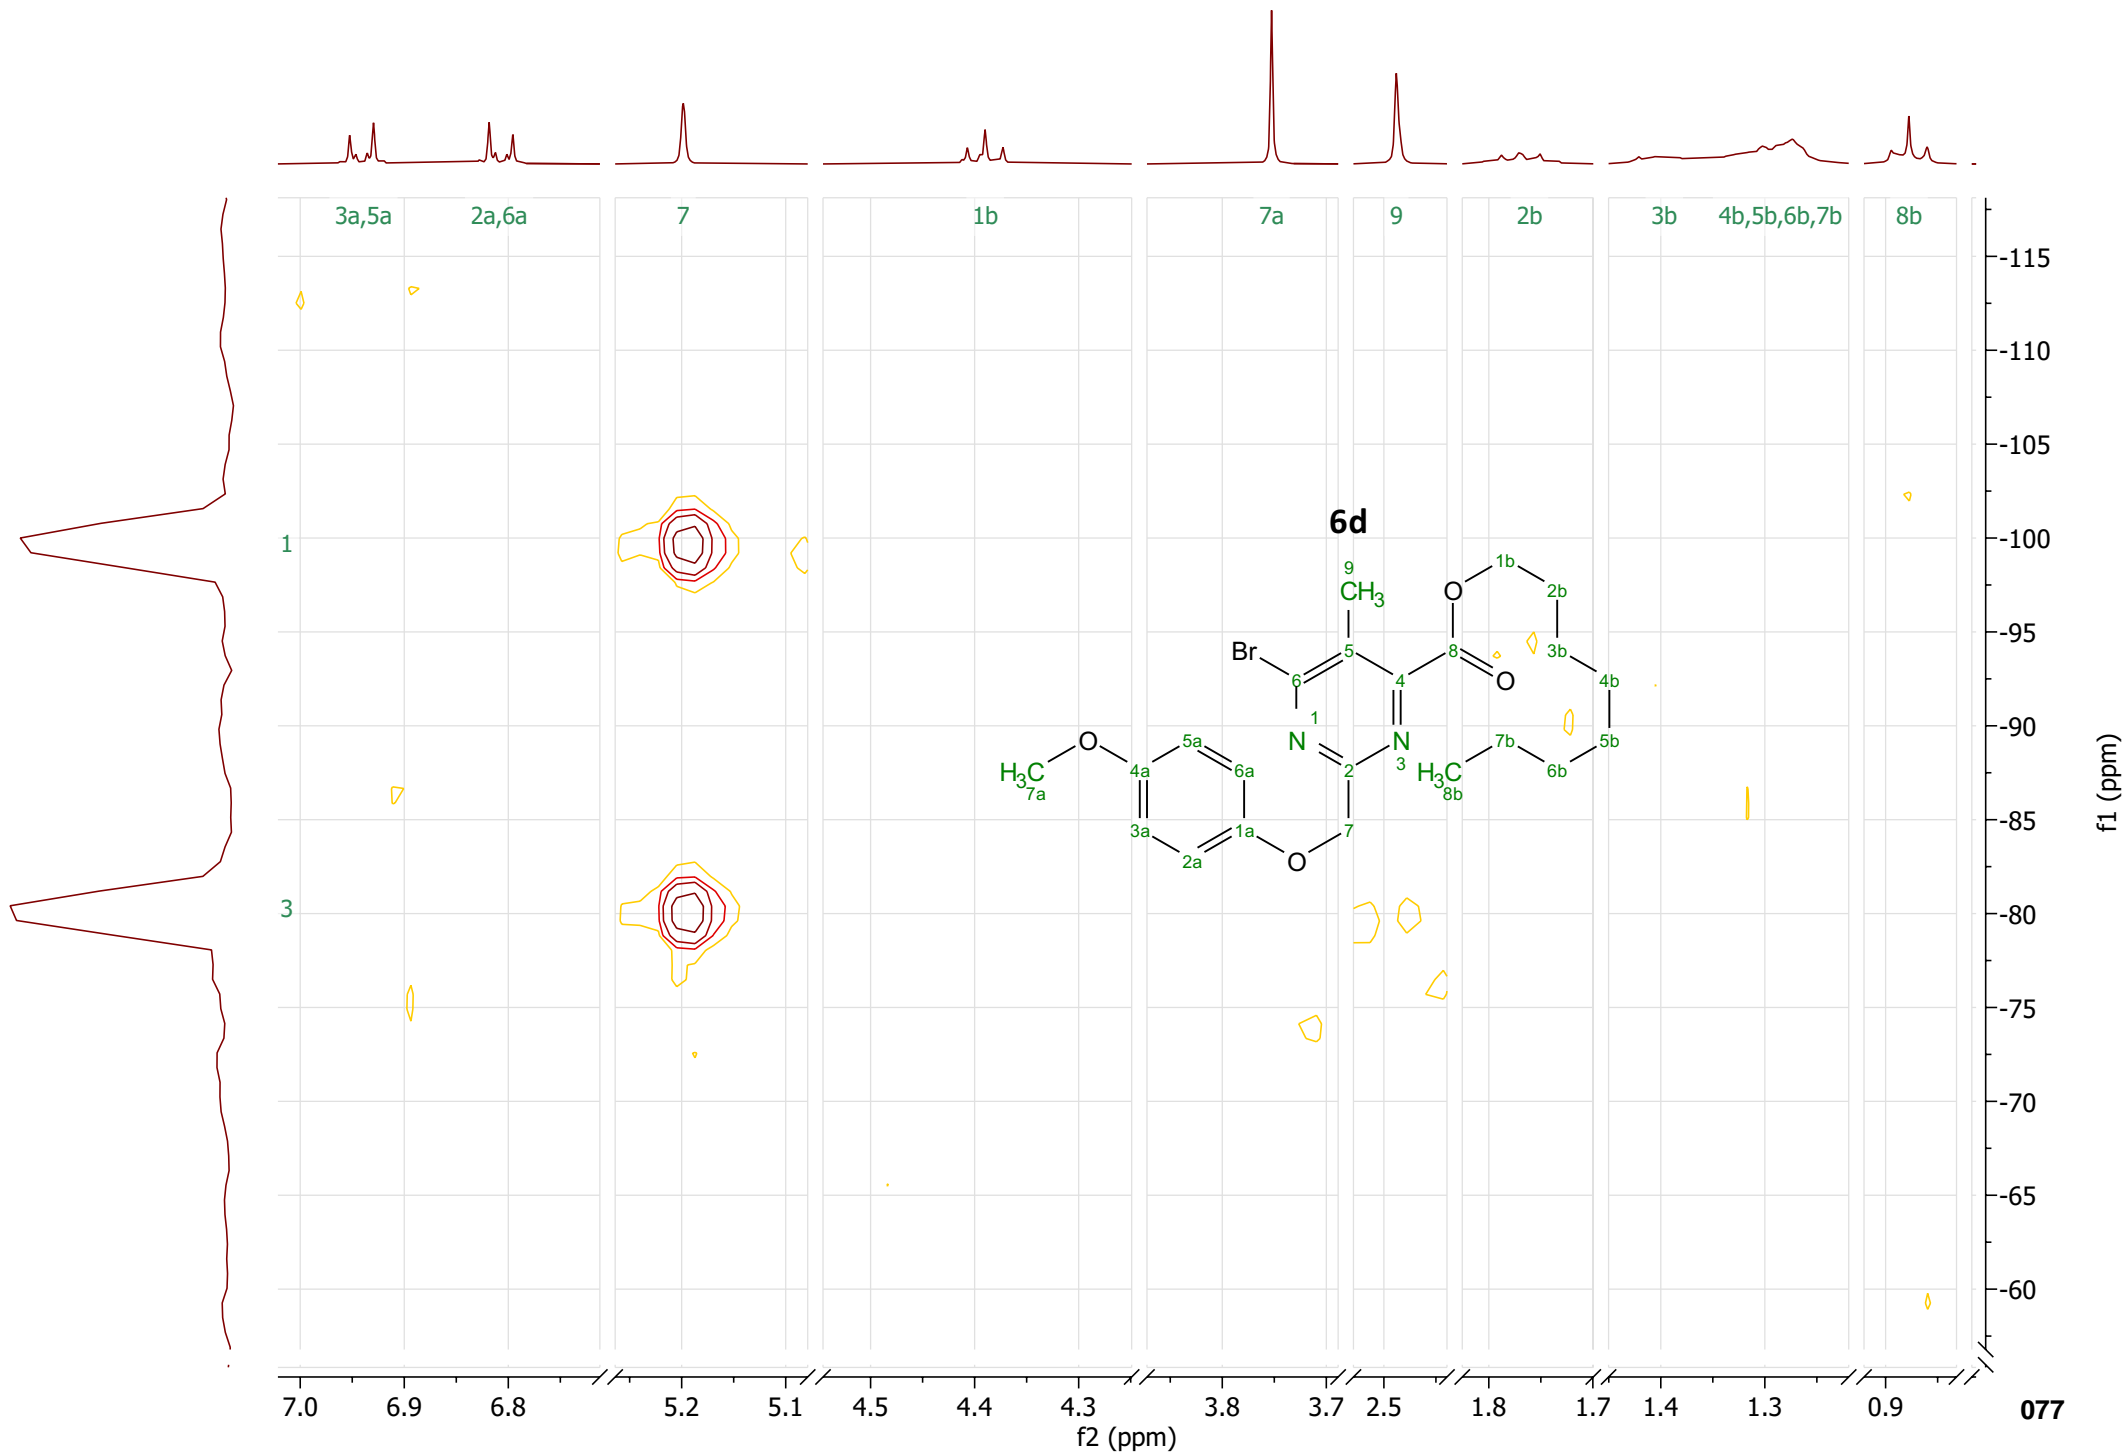

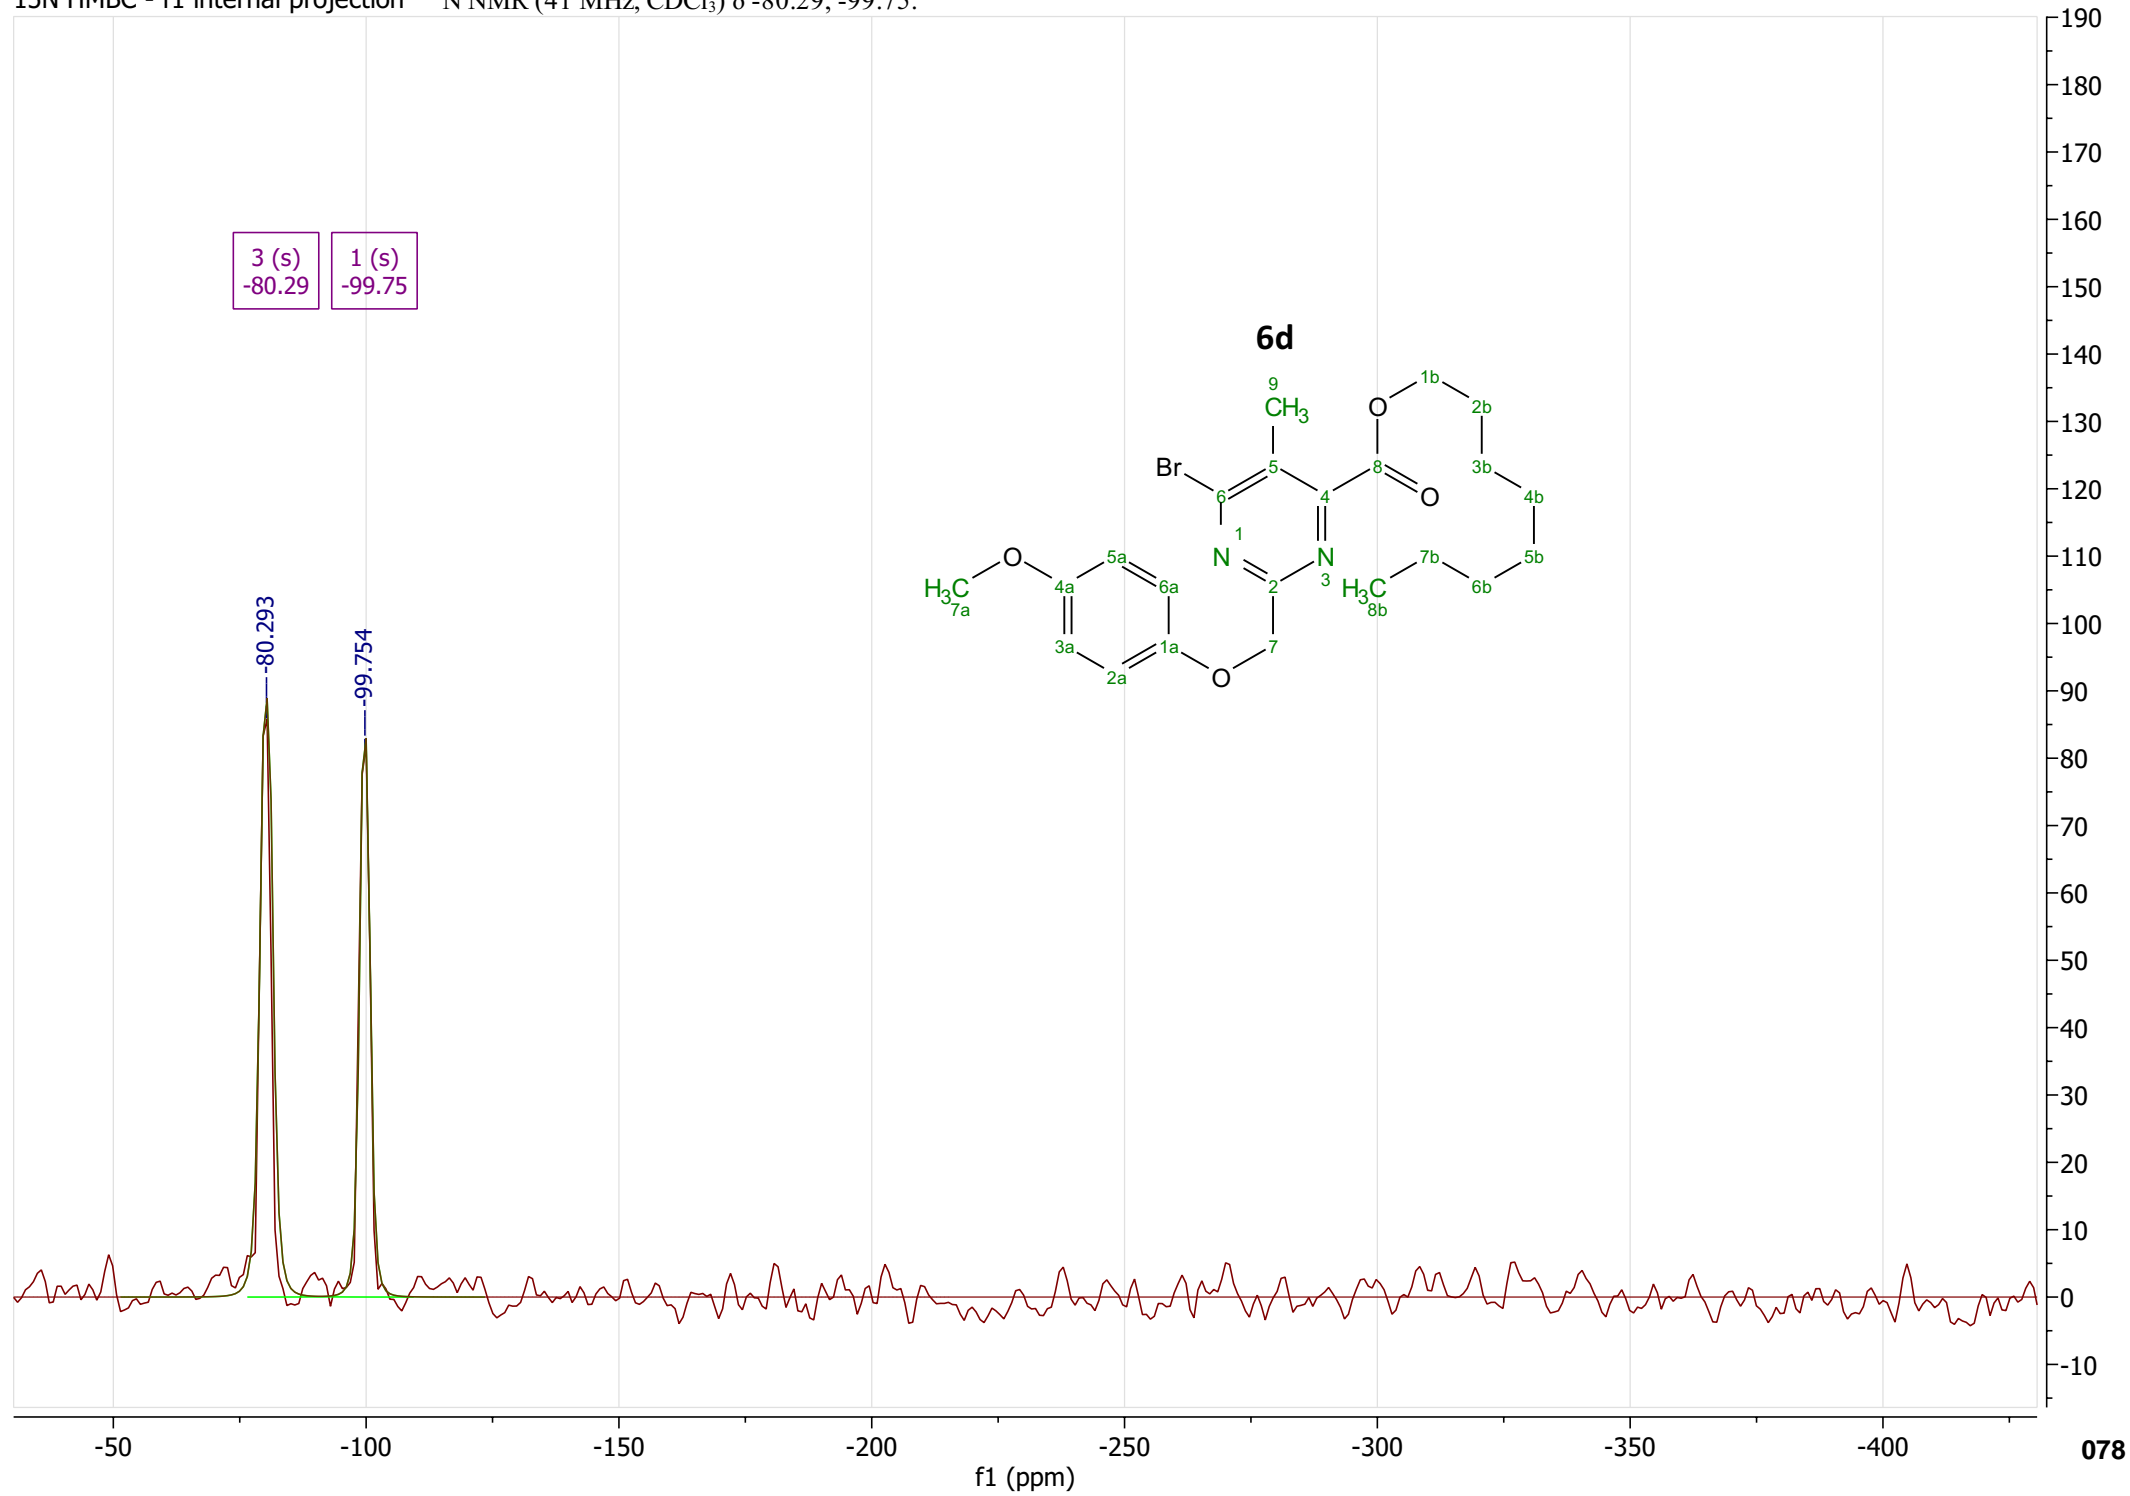

$^1\text{H}$  NMR (400 MHz,  $\text{CDCl}_3$ )  $\delta$  7.01 – 6.86 (m, 2H), 6.86 – 6.72 (m, 2H), 5.20 (s, 2H), 4.39 (t,  $J = 6.8$  Hz, 2H), 3.76 (s, 3H), 2.49 (s, 3H), 1.85 – 1.68 (m, 2H), 1.45 – 1.36 (m, 2H), 1.37 – 1.18 (m, 10H), 0.88 (app t,  $J = 6.8$  Hz, 3H).

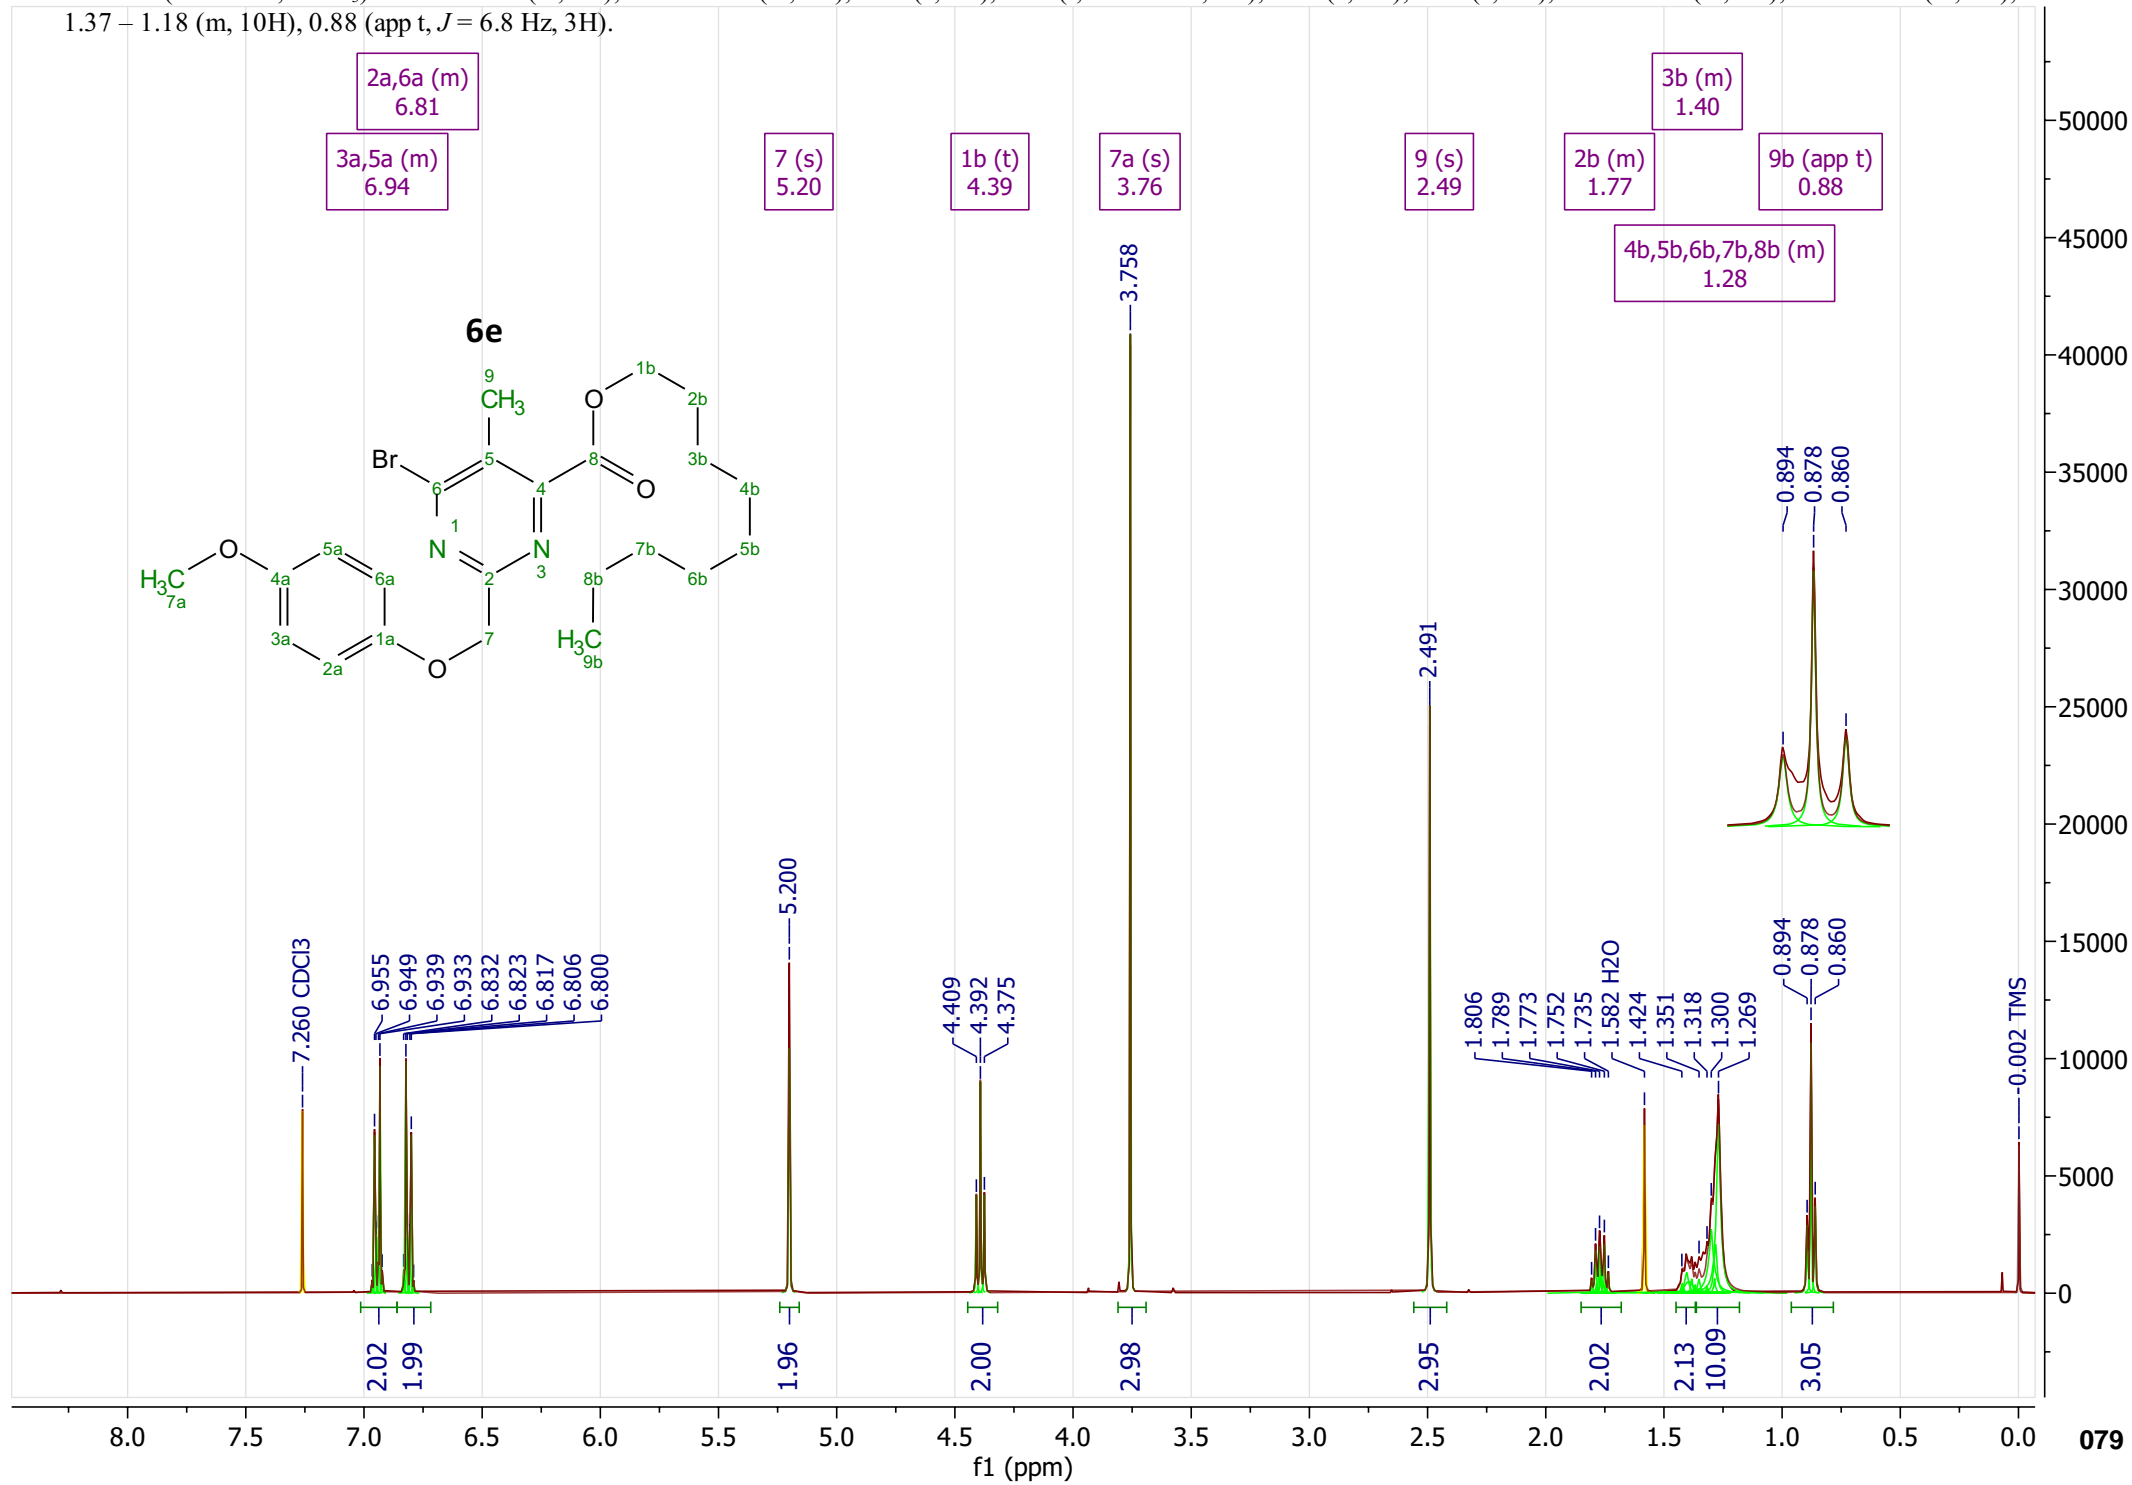

$^{13}\text{C}$  NMR (101 MHz,  $\text{CDCl}_3$ )  $\delta$  164.7, 164.0, 158.2, 157.0, 154.5, 152.6, 130.1, 116.4 (sym, 2C), 114.7 (sym, 2C), 70.9, 67.0, 55.8, 32.0, 29.6, 29.4, 29.3, 28.6, 26.0, 22.8, 17.8, 14.2.

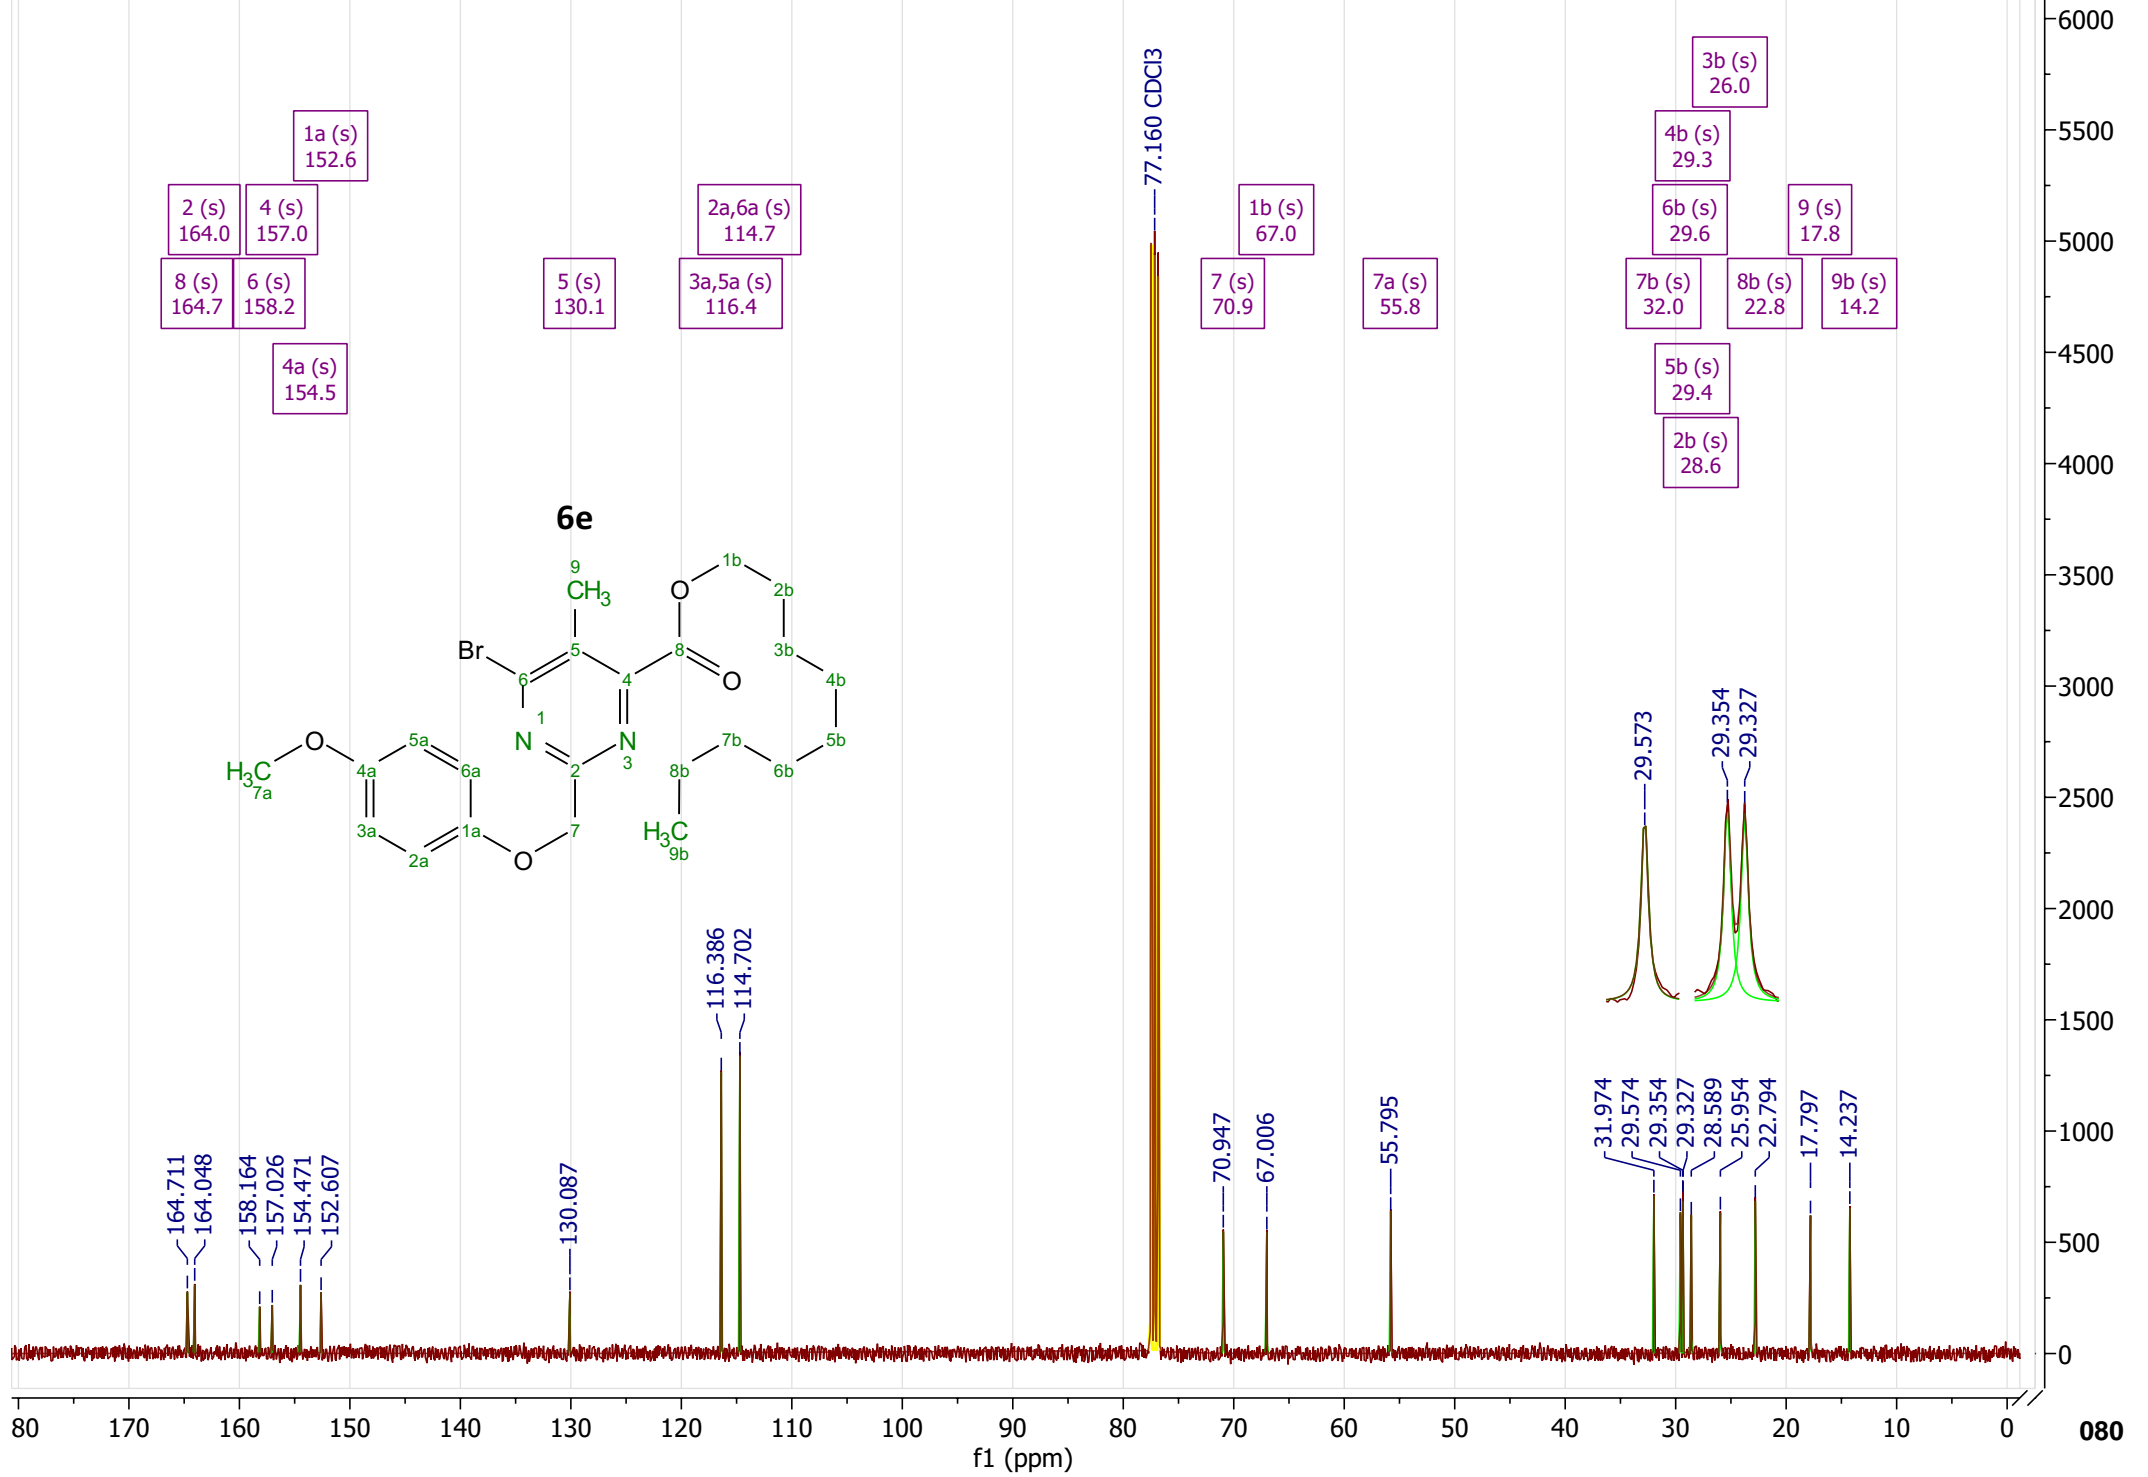



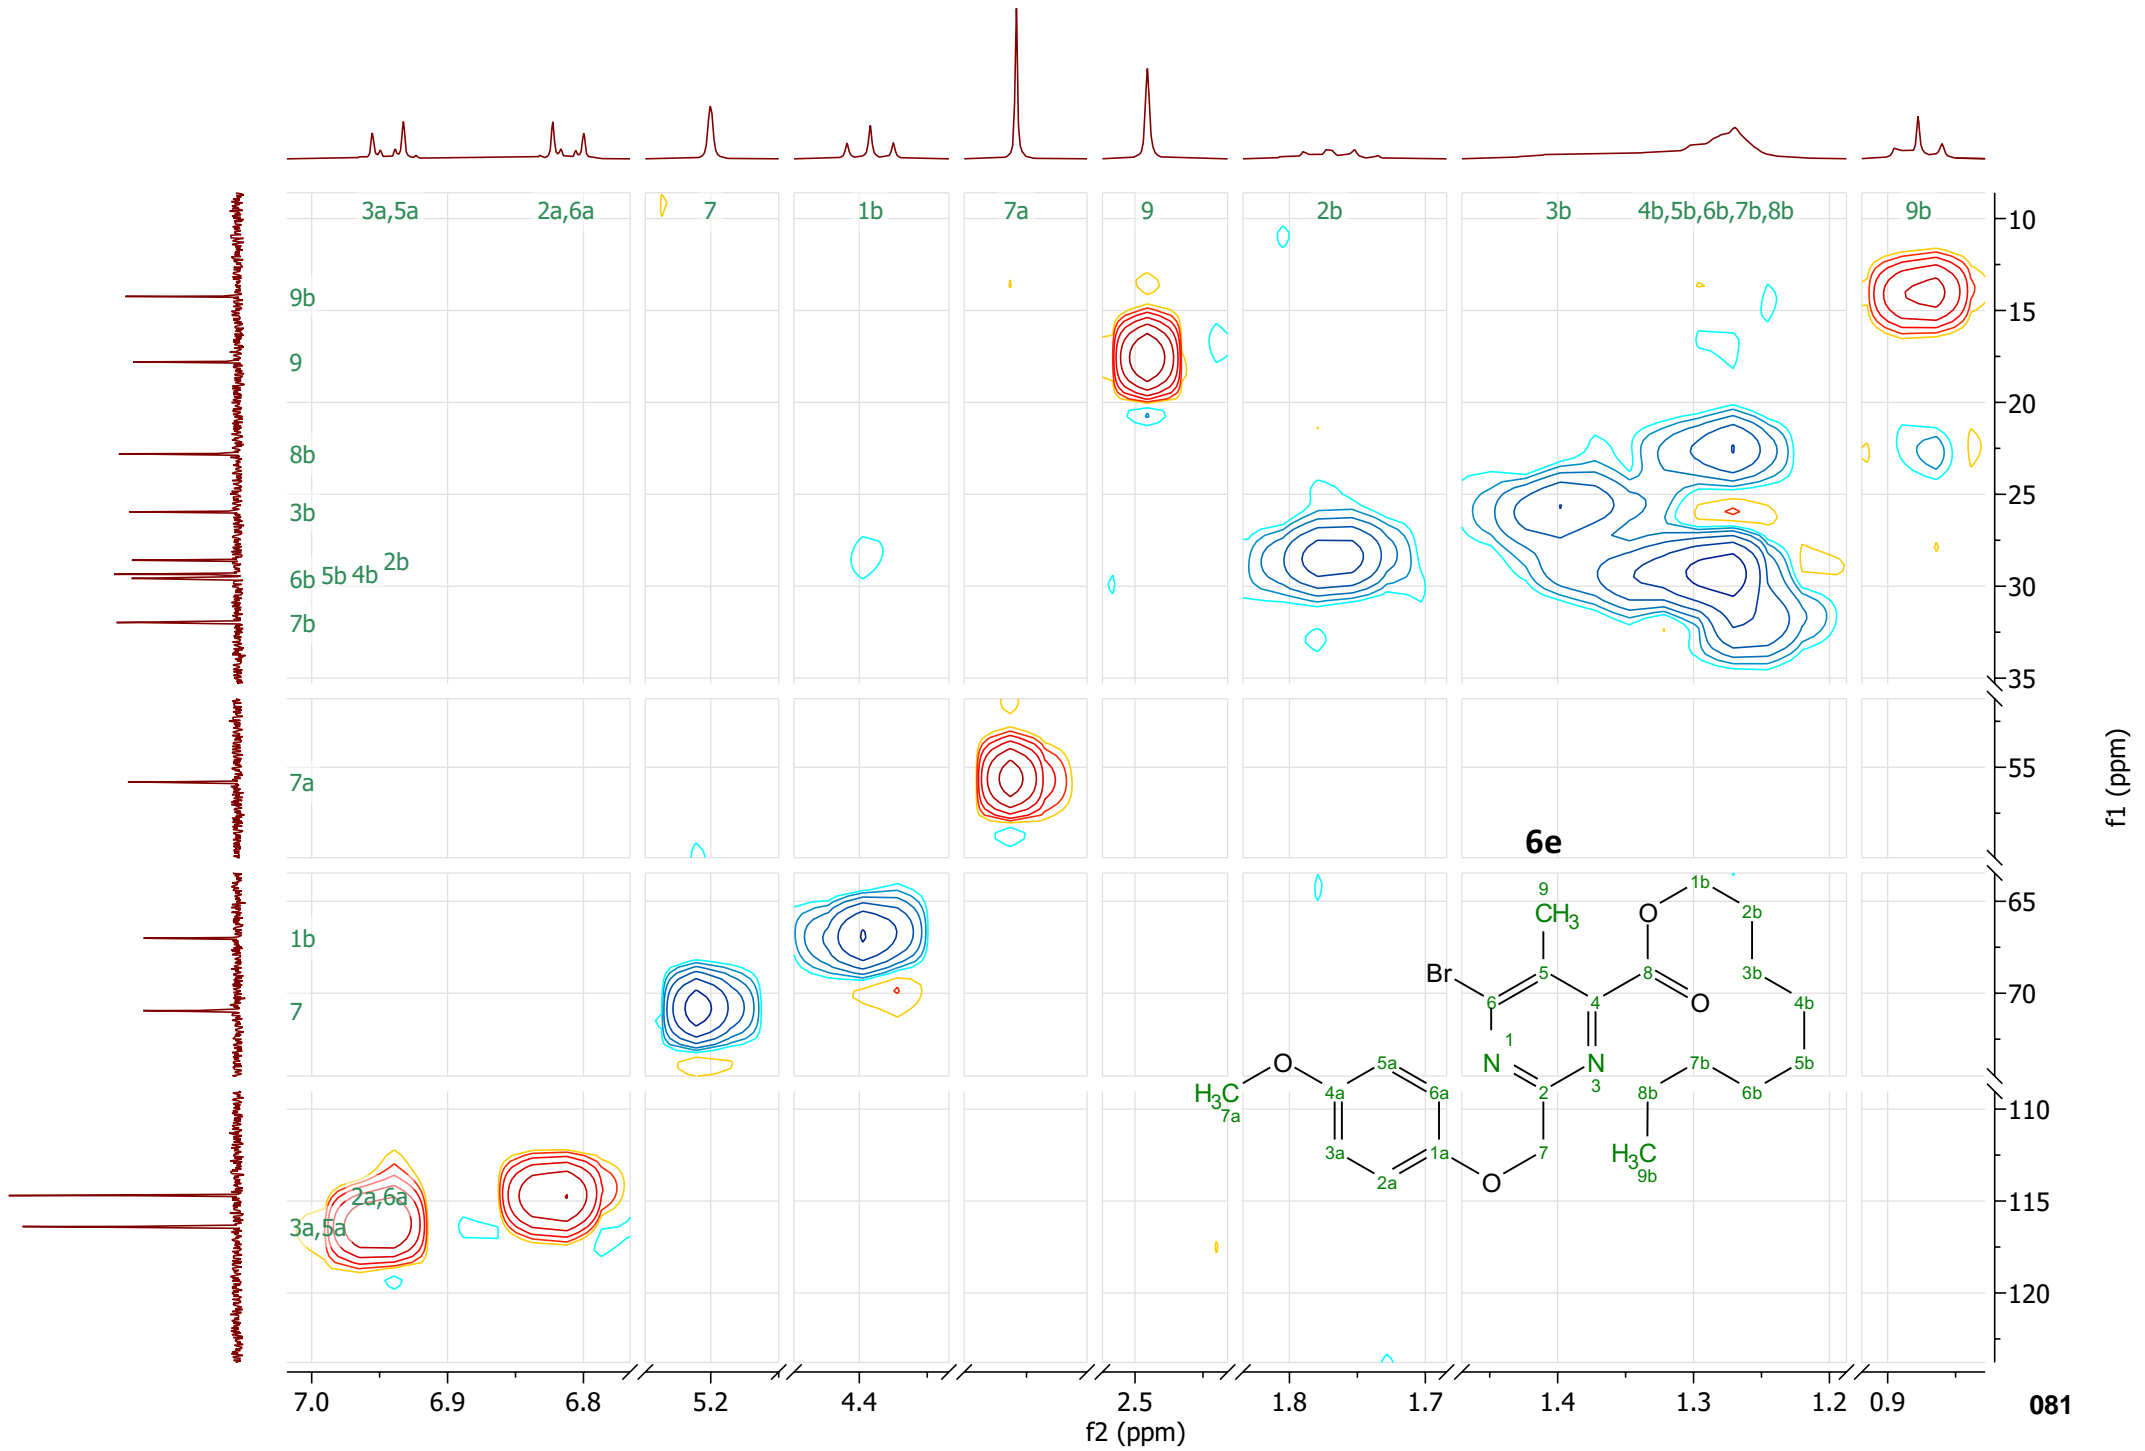

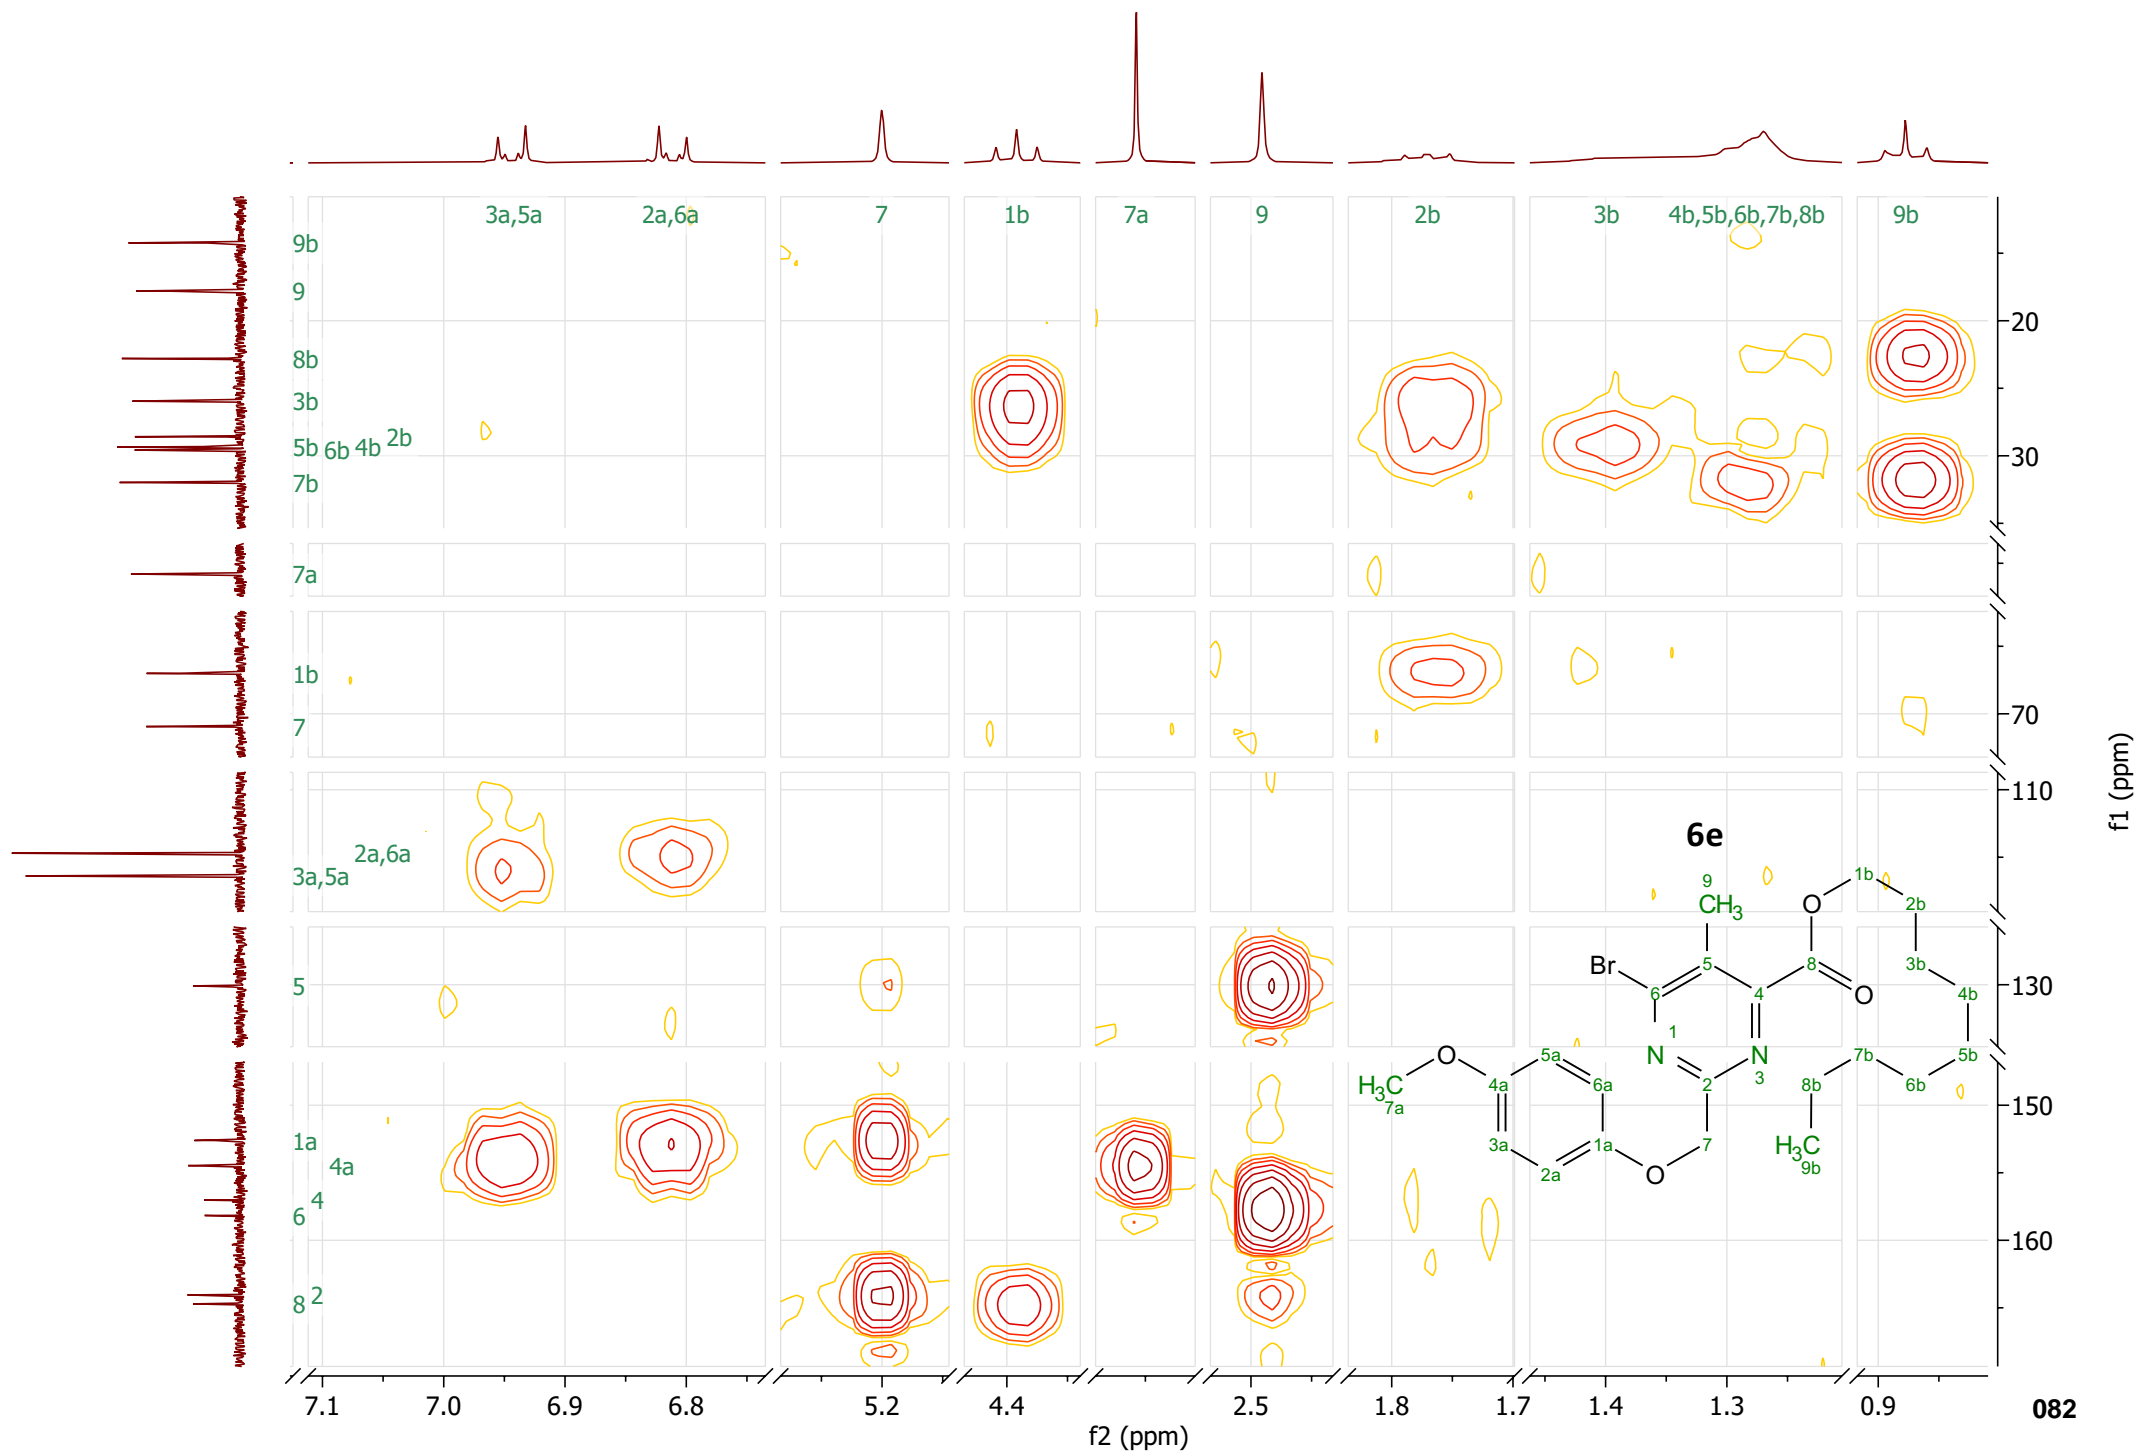

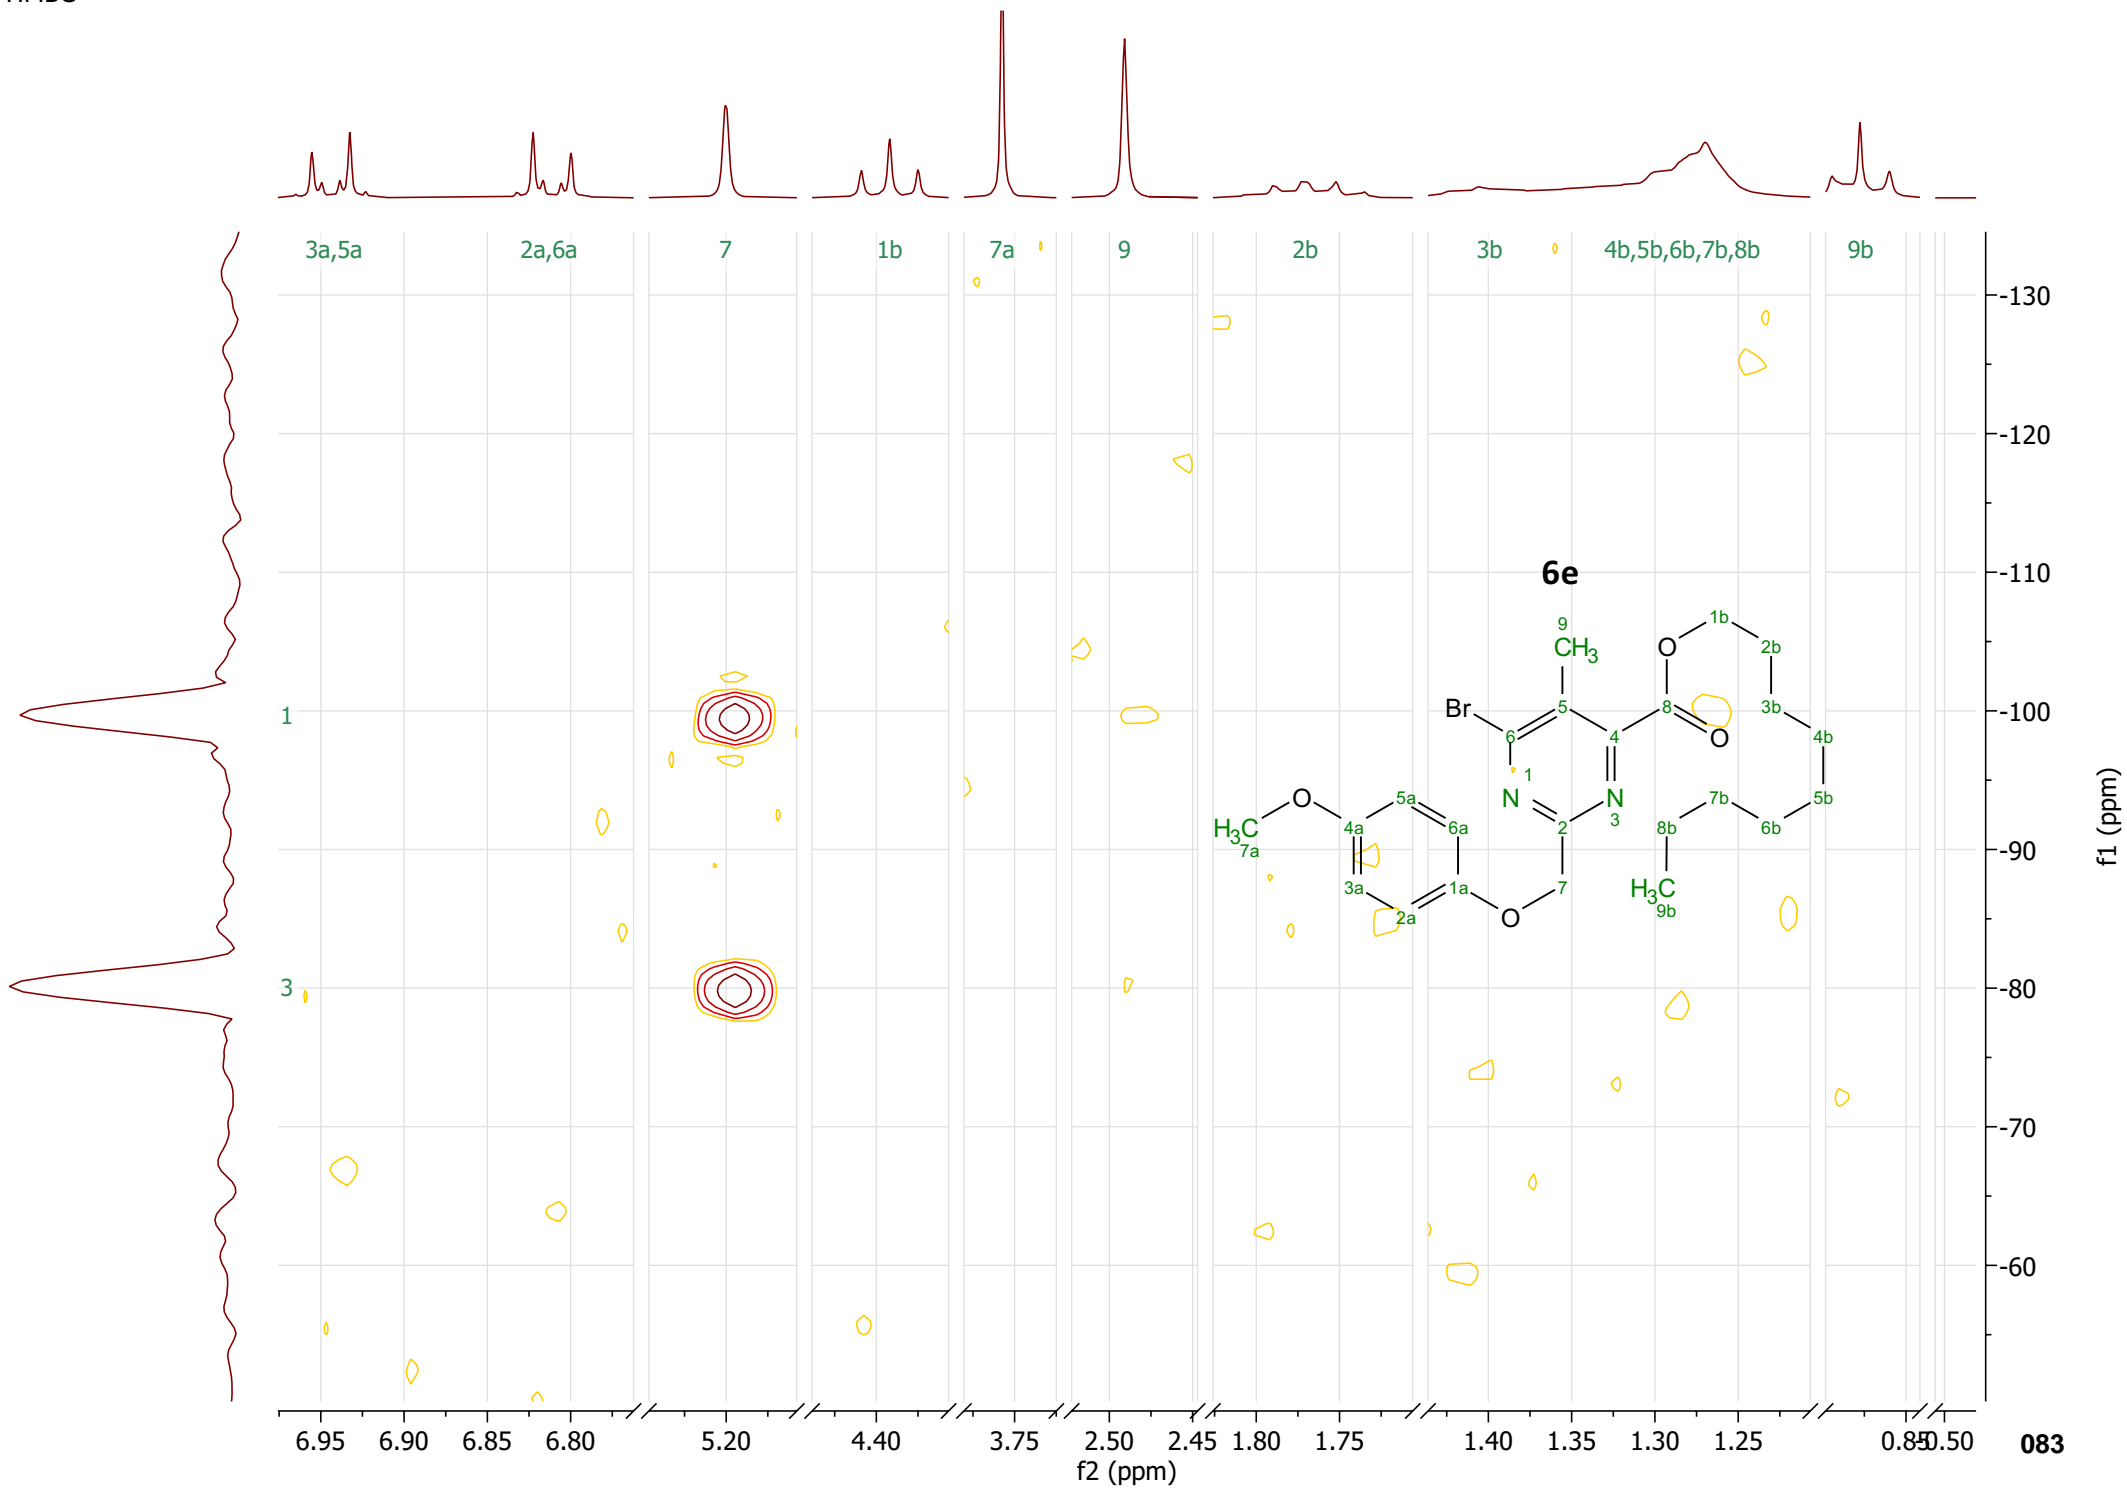

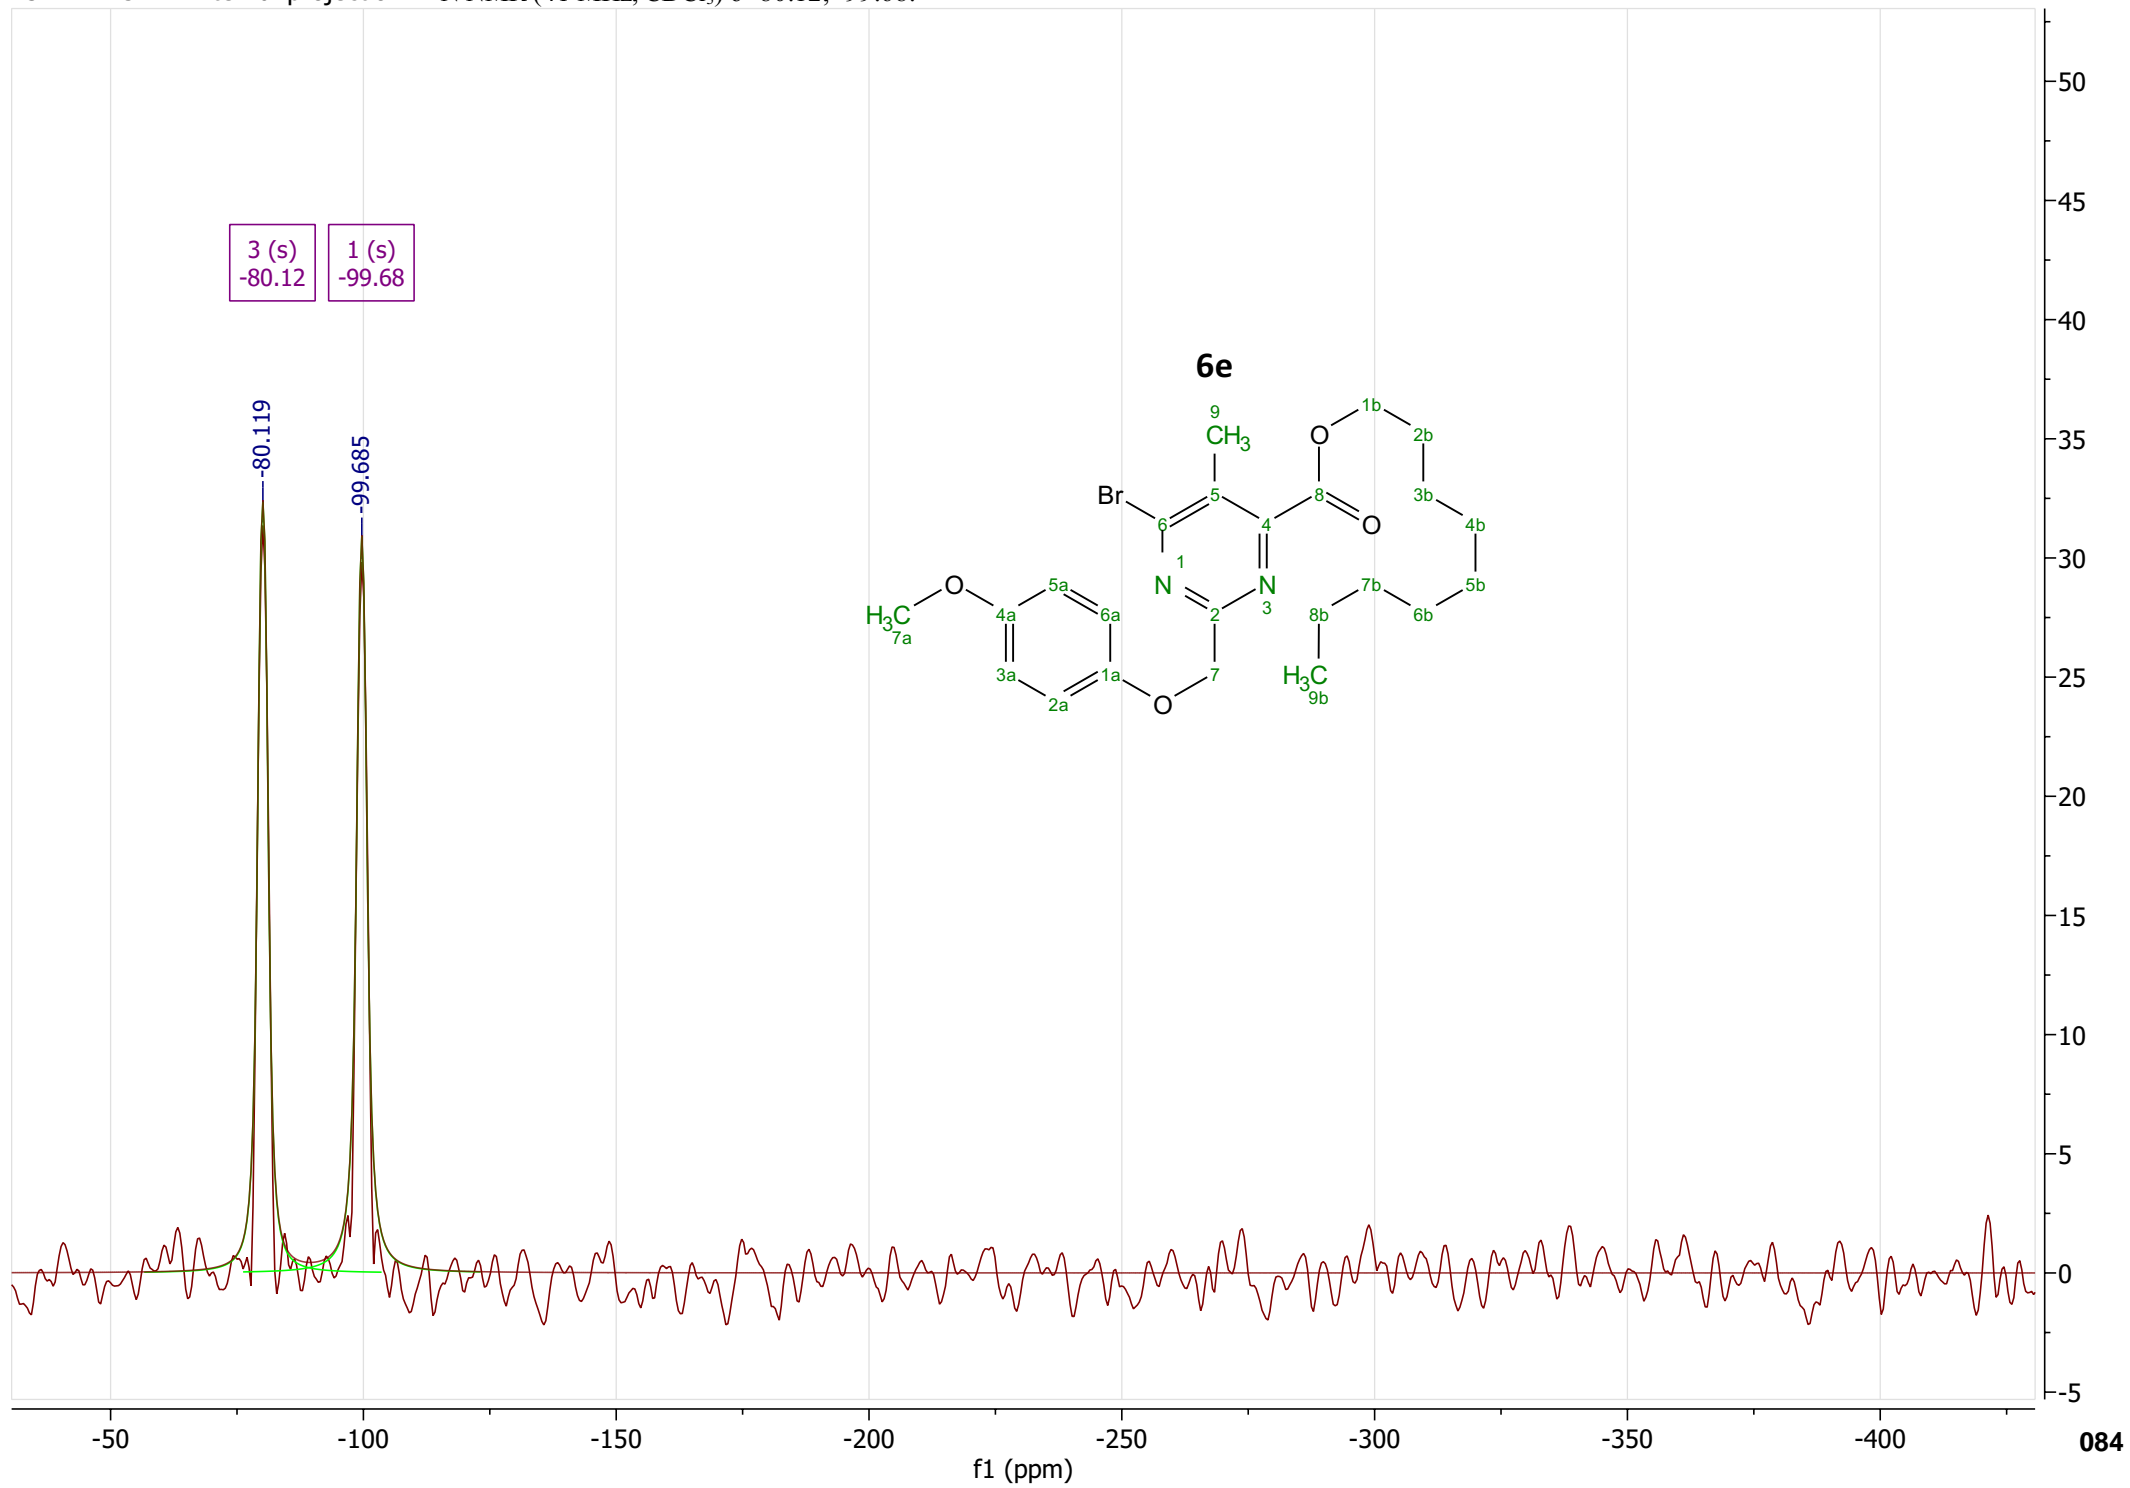

$^1\text{H}$  NMR (400 MHz,  $\text{CDCl}_3$ )  $\delta$  7.05 – 6.90 (m, 2H), 6.90 – 6.71 (m, 2H), 5.20 (s, 2H), 4.47 (q,  $J = 7.2$  Hz, 2H), 3.75 (s, 3H), 2.49 (s, 3H), 1.42 (t,  $J = 7.1$  Hz, 3H).

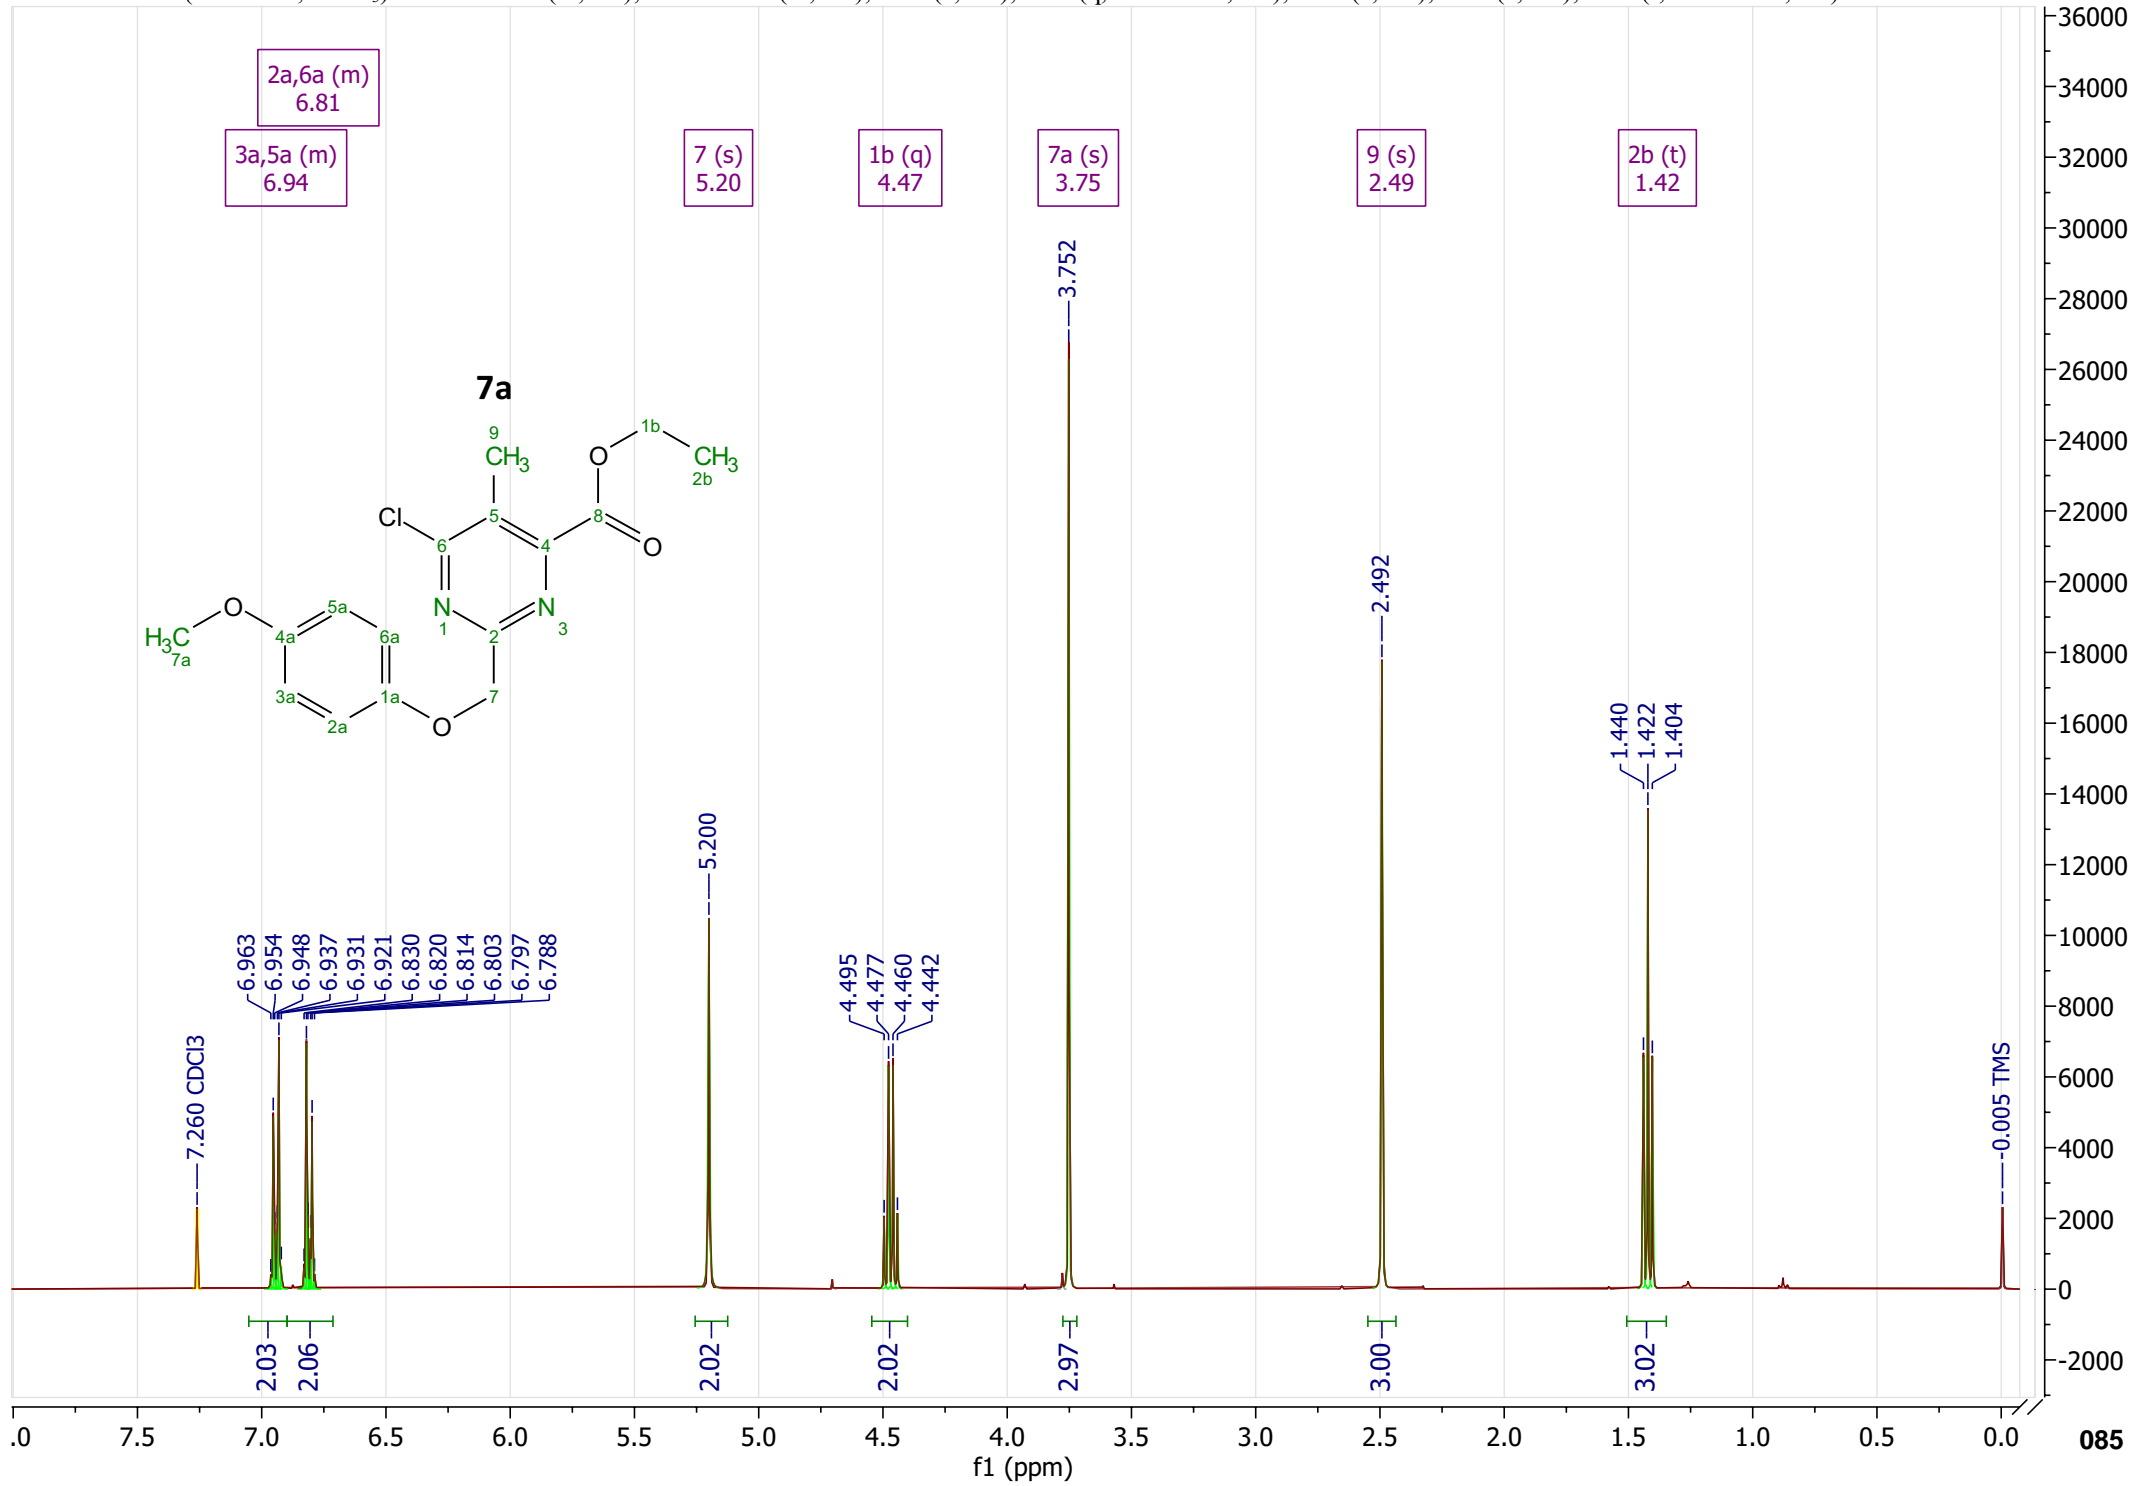

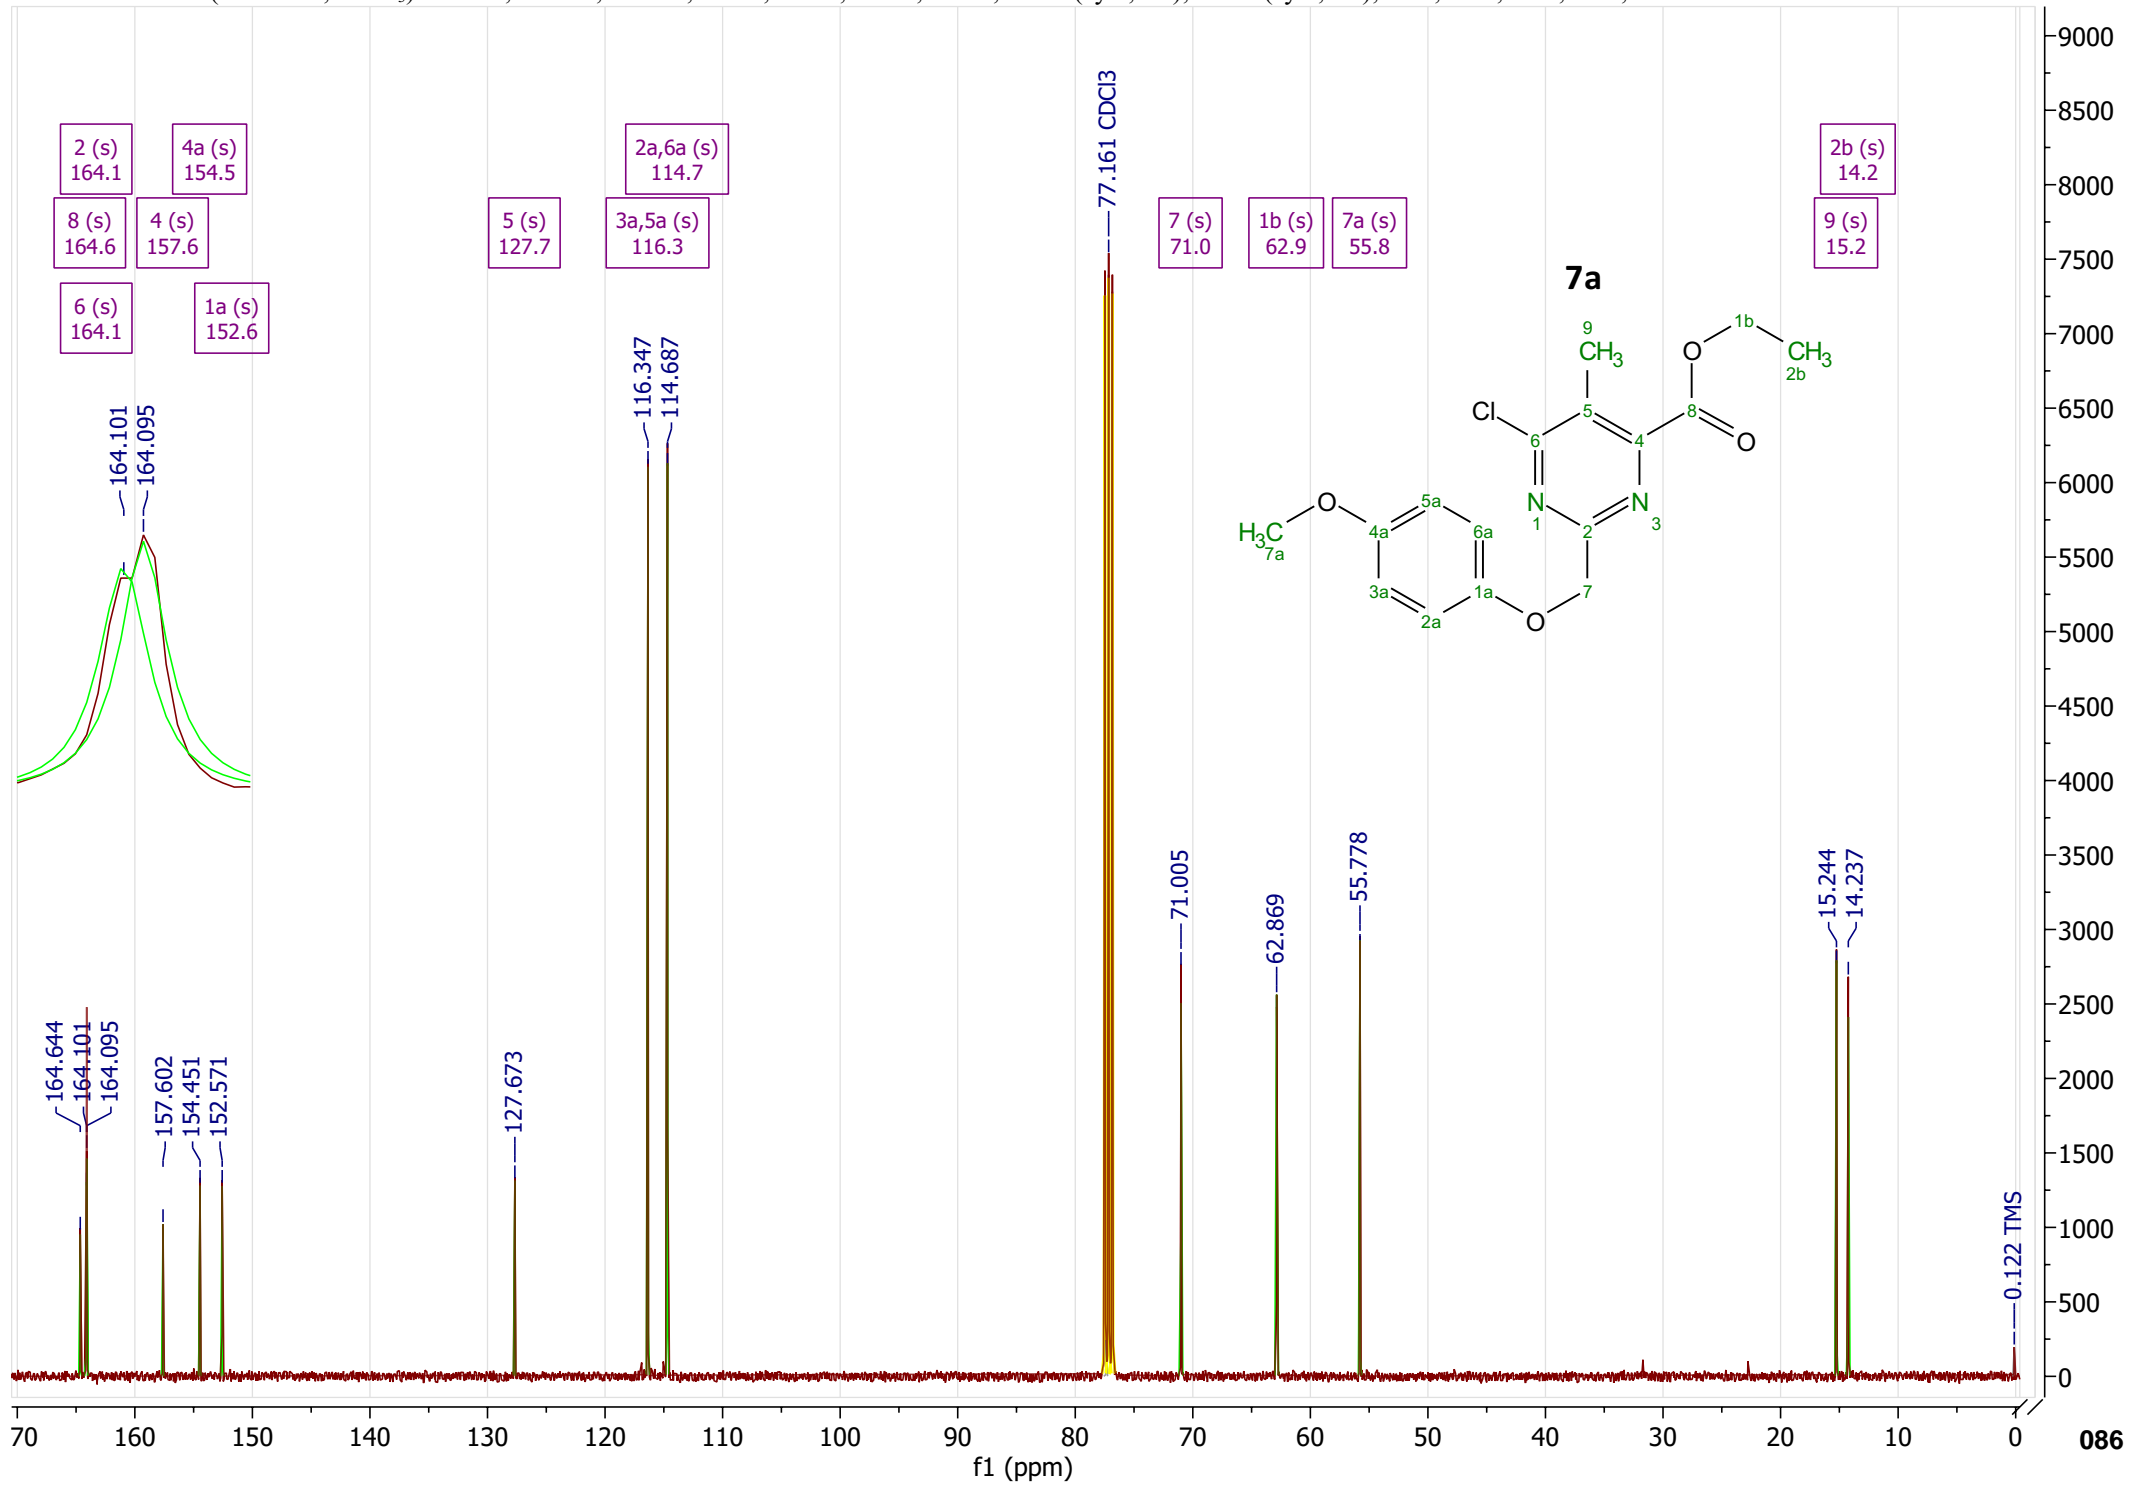

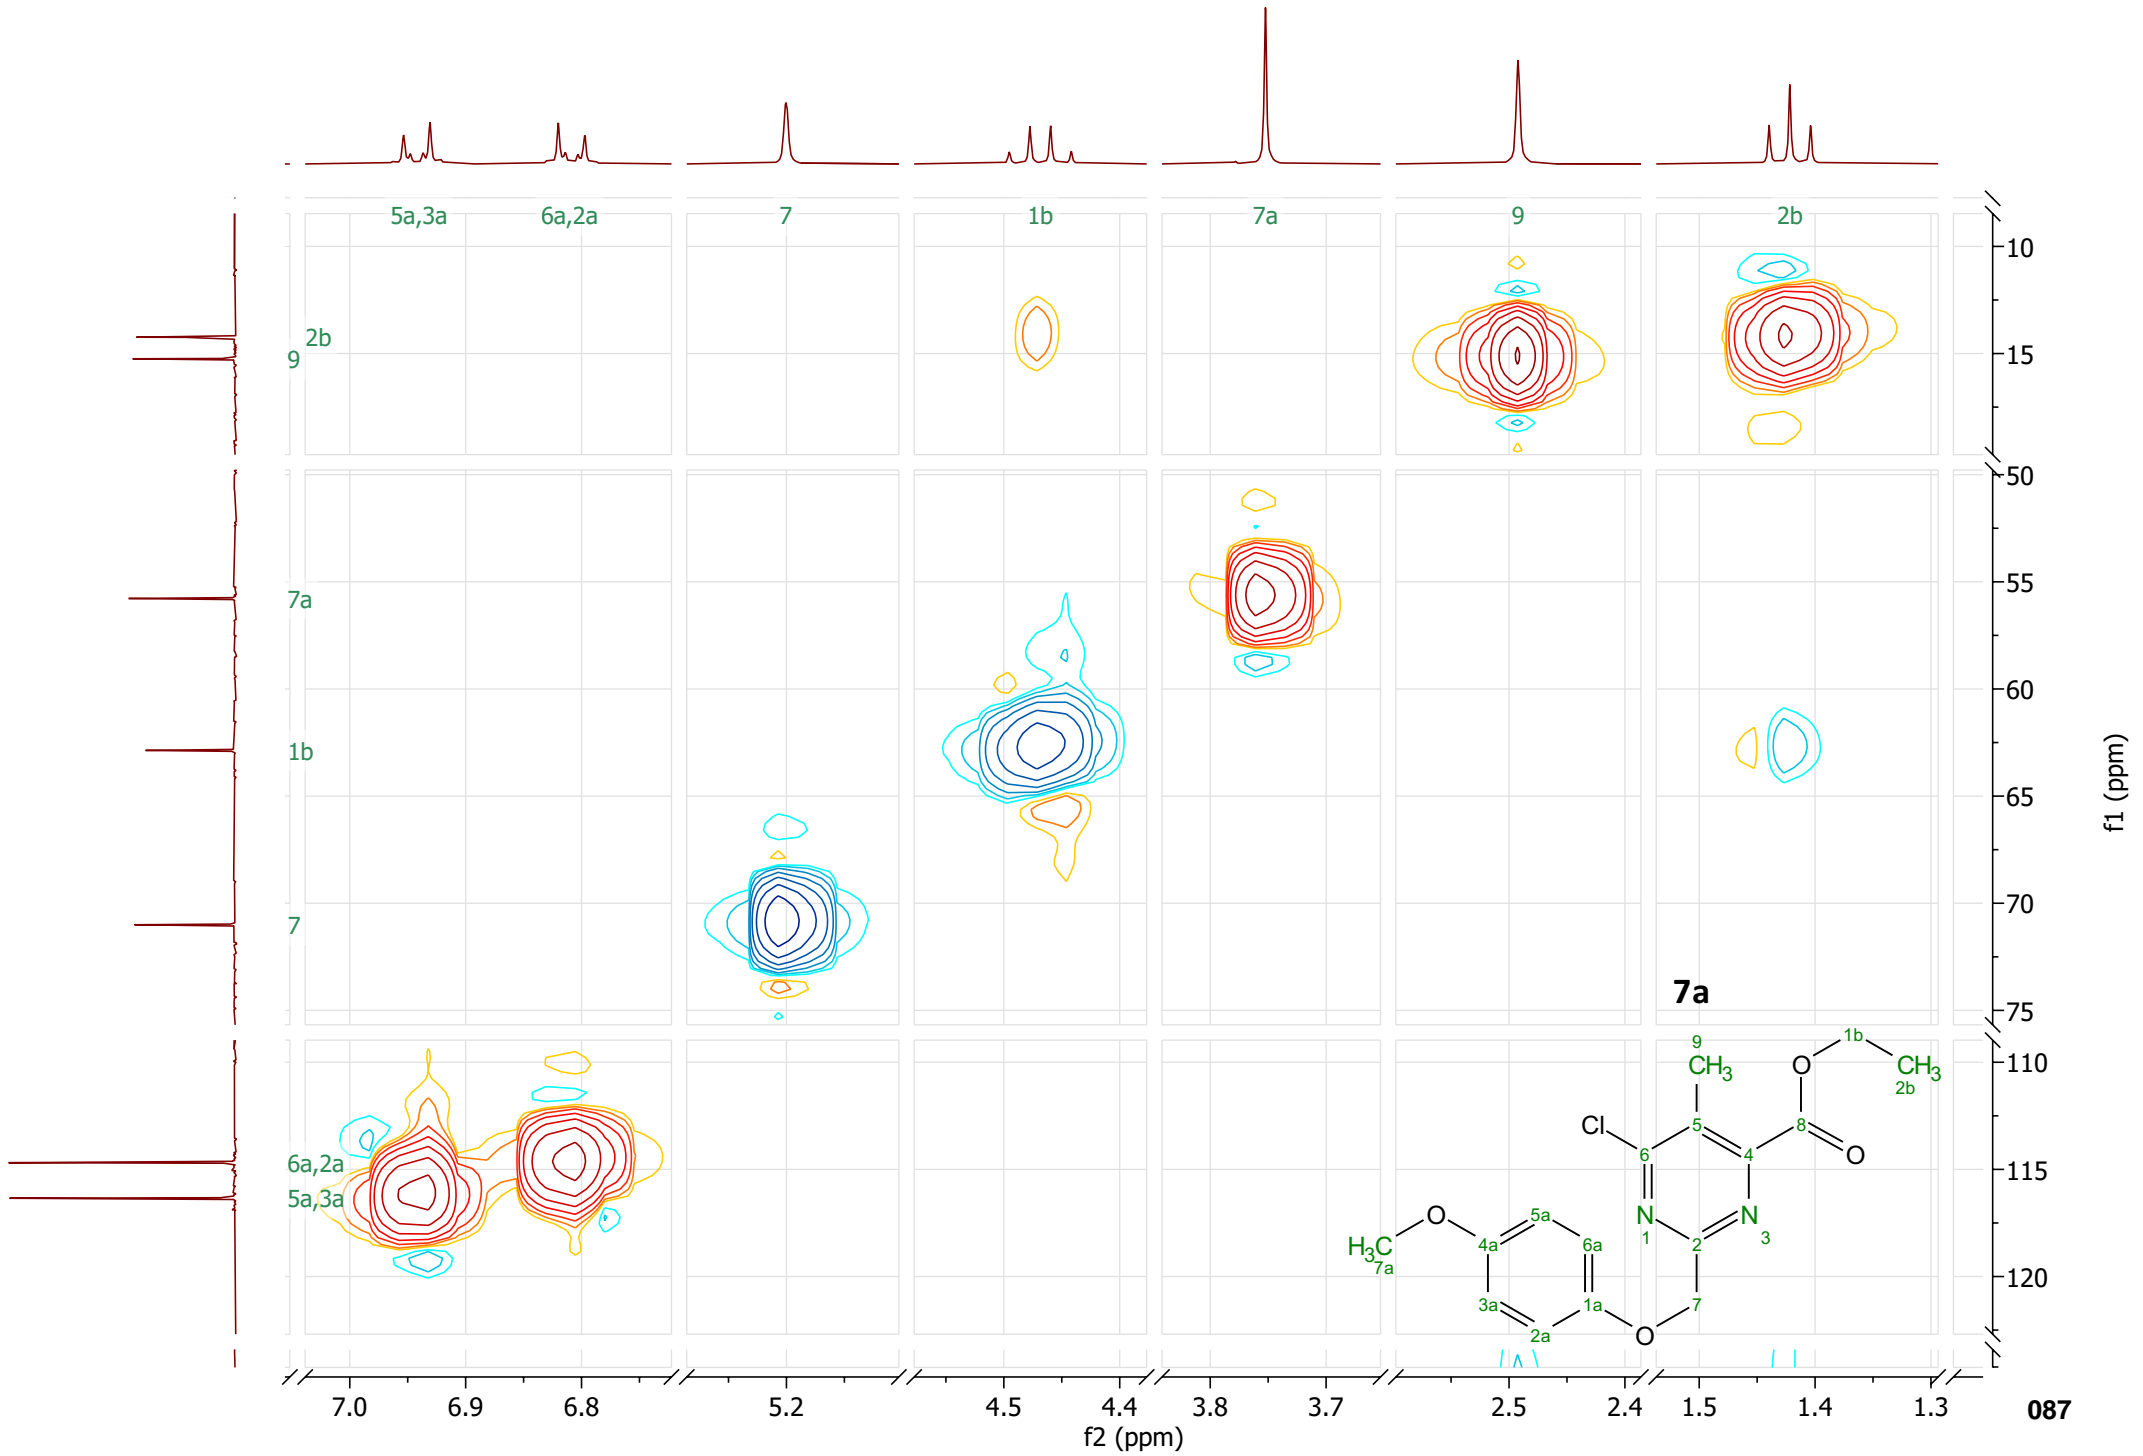





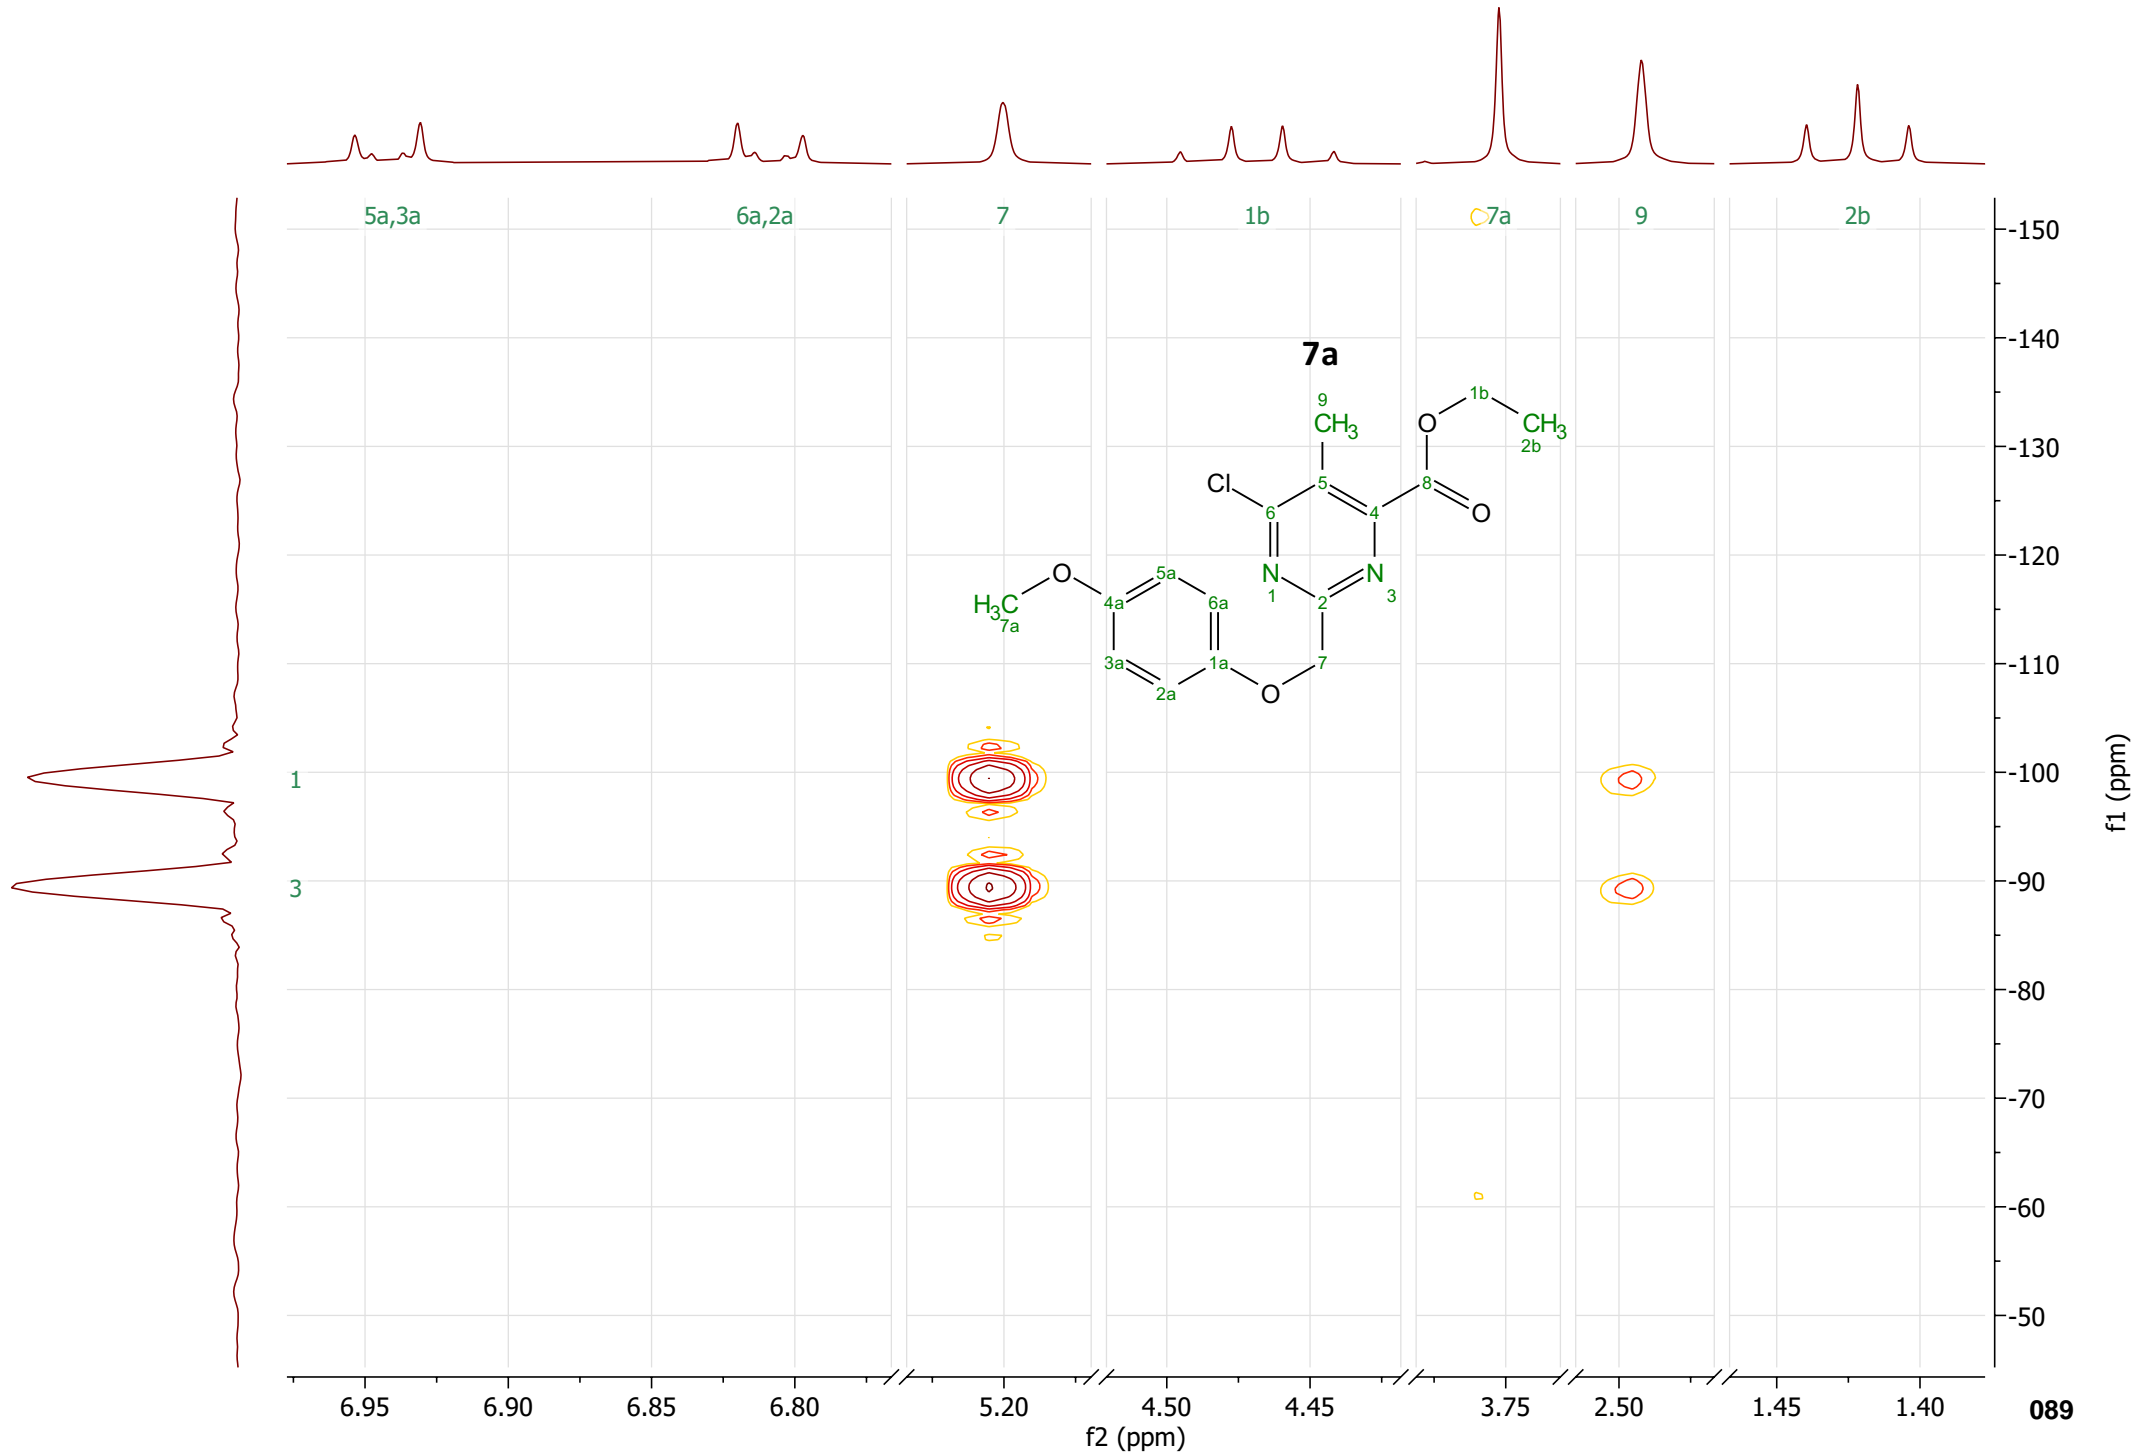

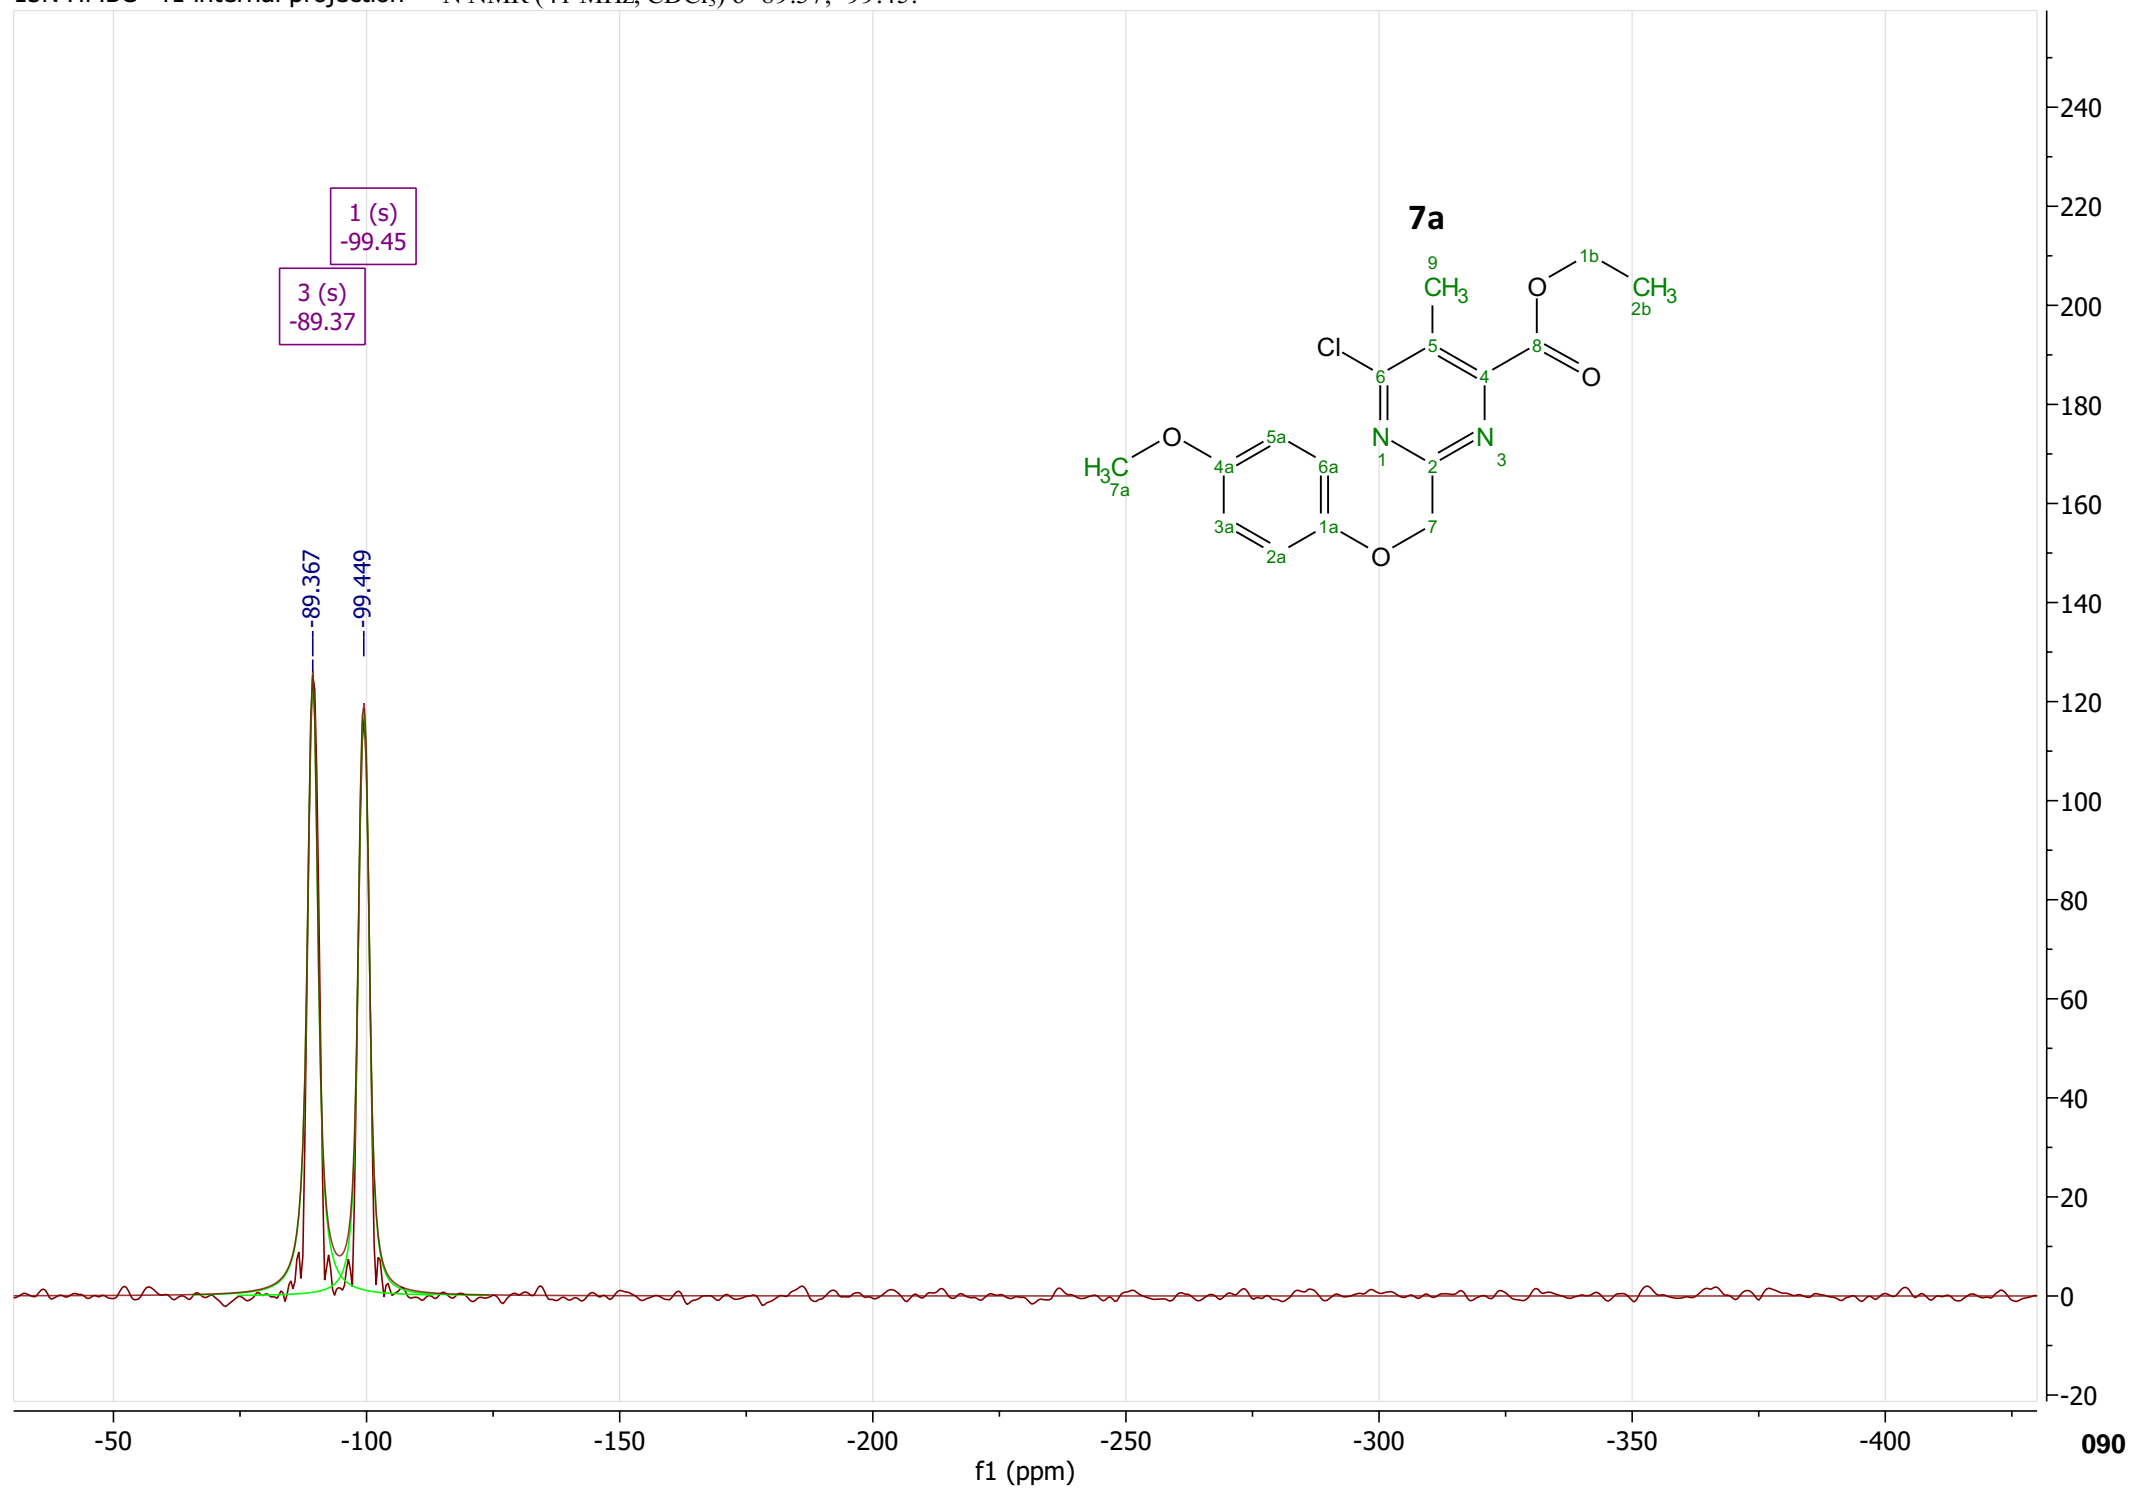

<sup>1</sup>H NMR (400 MHz, CDCl<sub>3</sub>) δ 6.94 (d, *J* = 0.6 Hz, 2H), 6.85 – 6.76 (m, 2H), 5.20 (app d, *J* = 0.6 Hz, 2H), 4.41 (t, *J* = 6.7 Hz, 2H), 3.75 (s, 3H), 2.48 (app t, *J* = 0.6 Hz, 3H), 1.82 – 1.70 (m, 2H), 1.51 – 1.37 (m, 2H), 0.97 (t, *J* = 7.4 Hz, 3H).

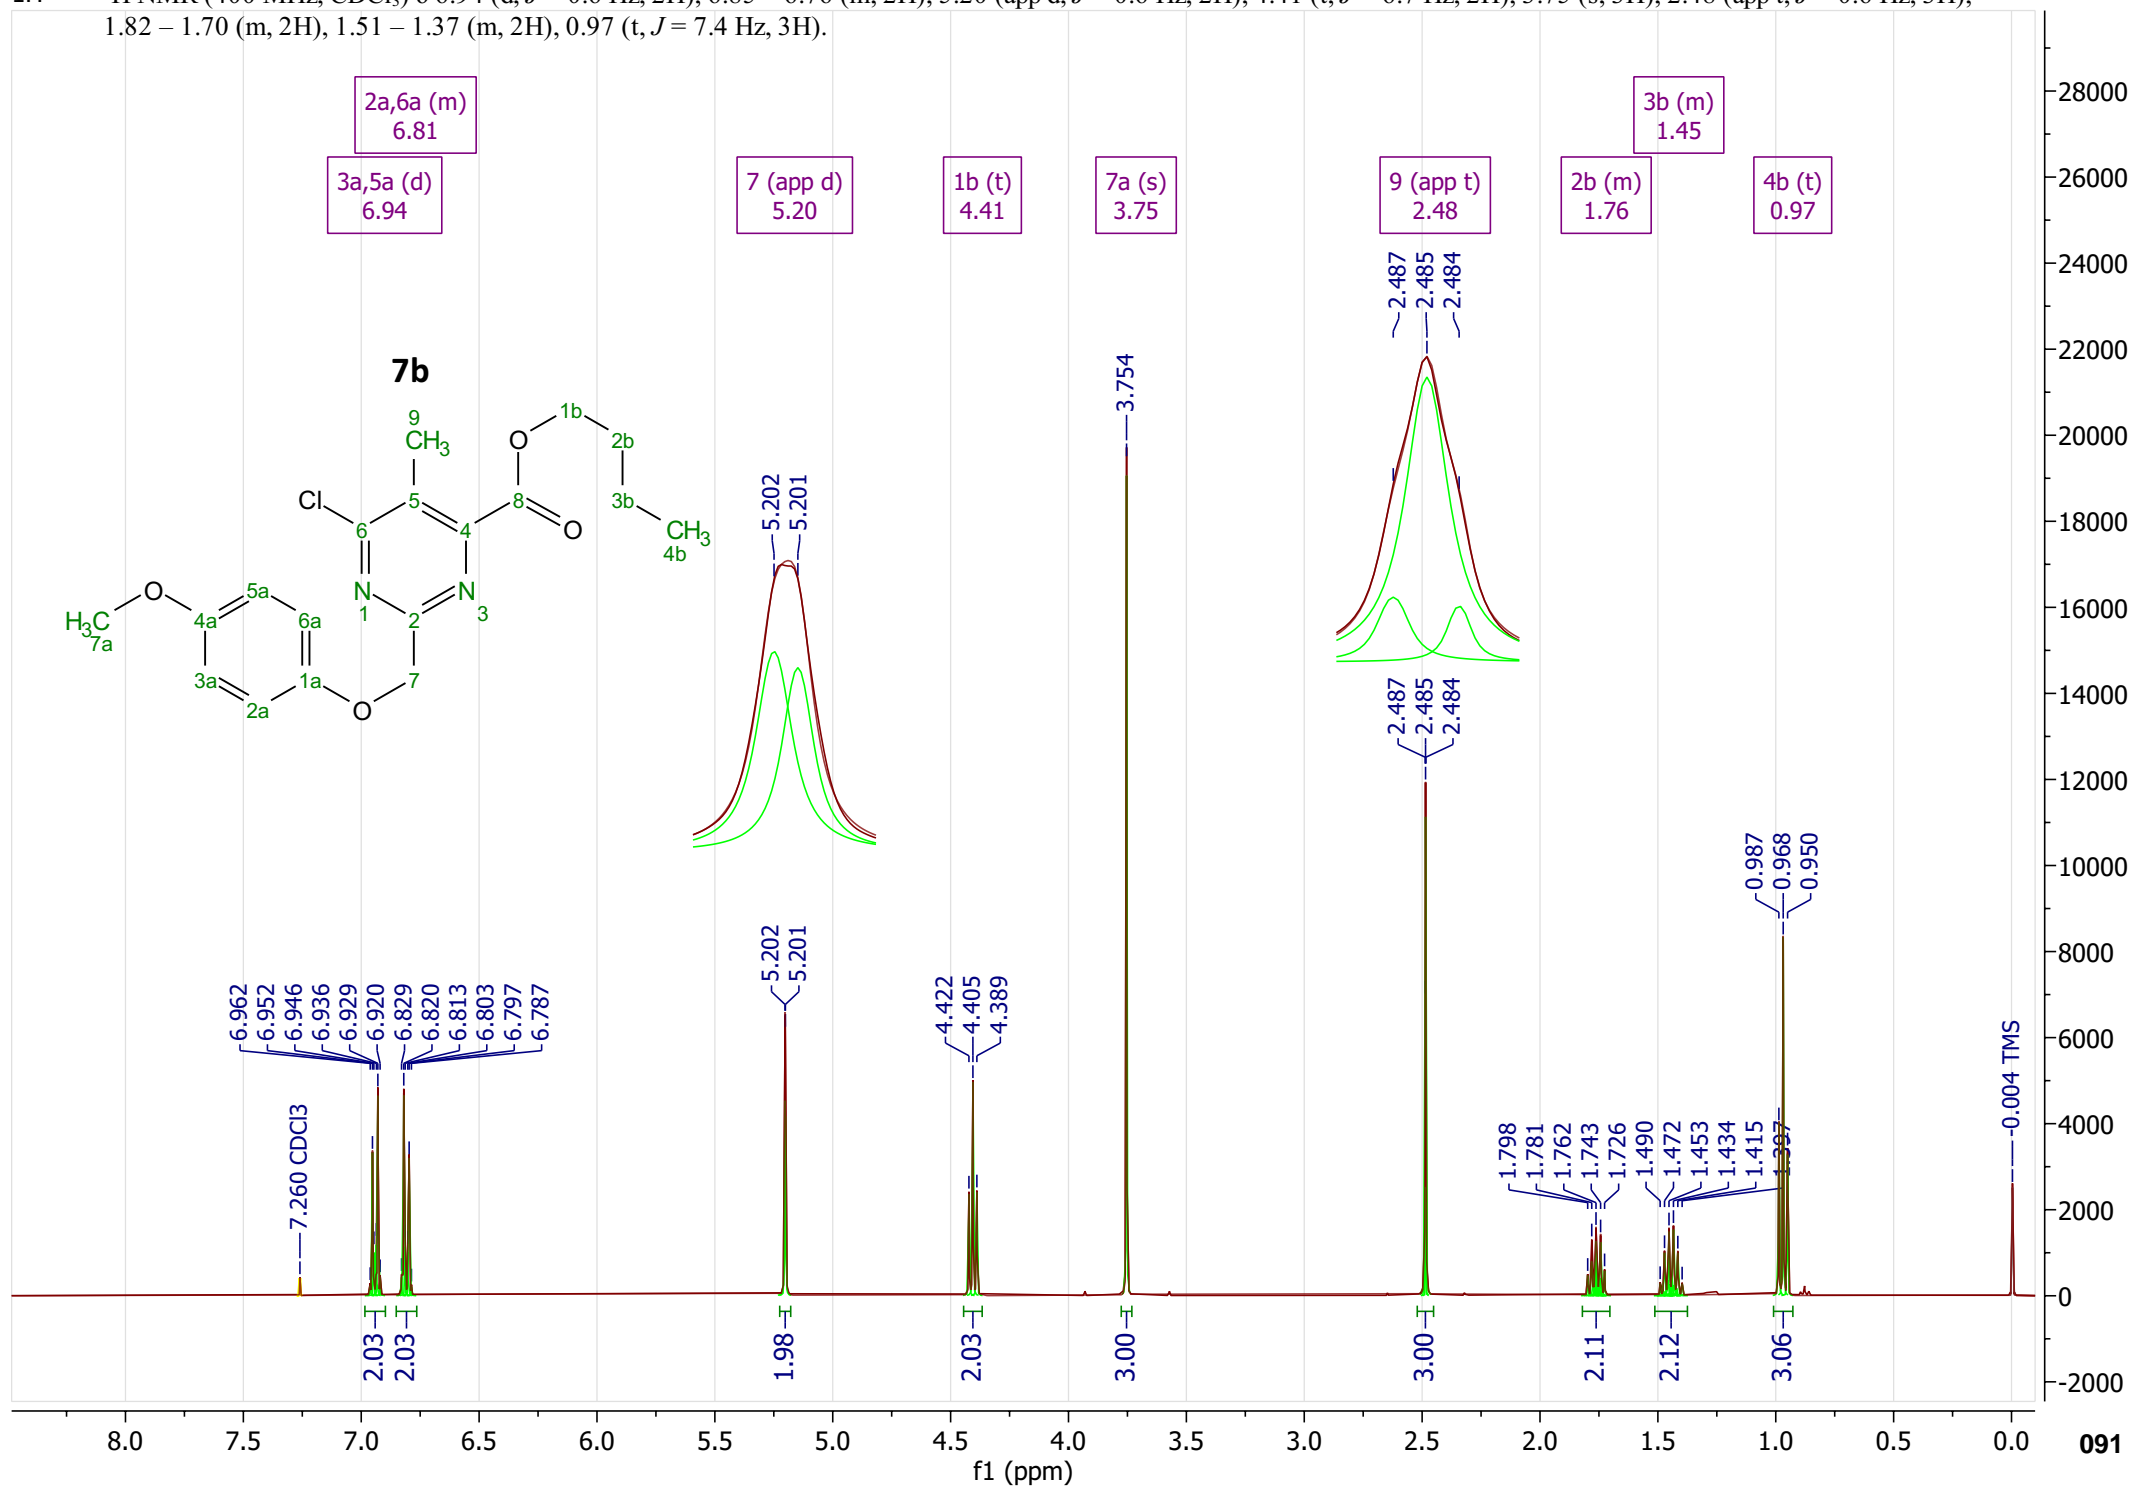

<sup>13</sup>C NMR (101 MHz, CDCl<sub>3</sub>) δ 164.8, 164.12, 164.06, 157.7, 154.4, 152.6, 127.5, 116.3(sym, 2C), 114.7 (sym, 2C), 71.0, 66.7, 55.8, 30.6, 19.2, 15.3, 13.8.

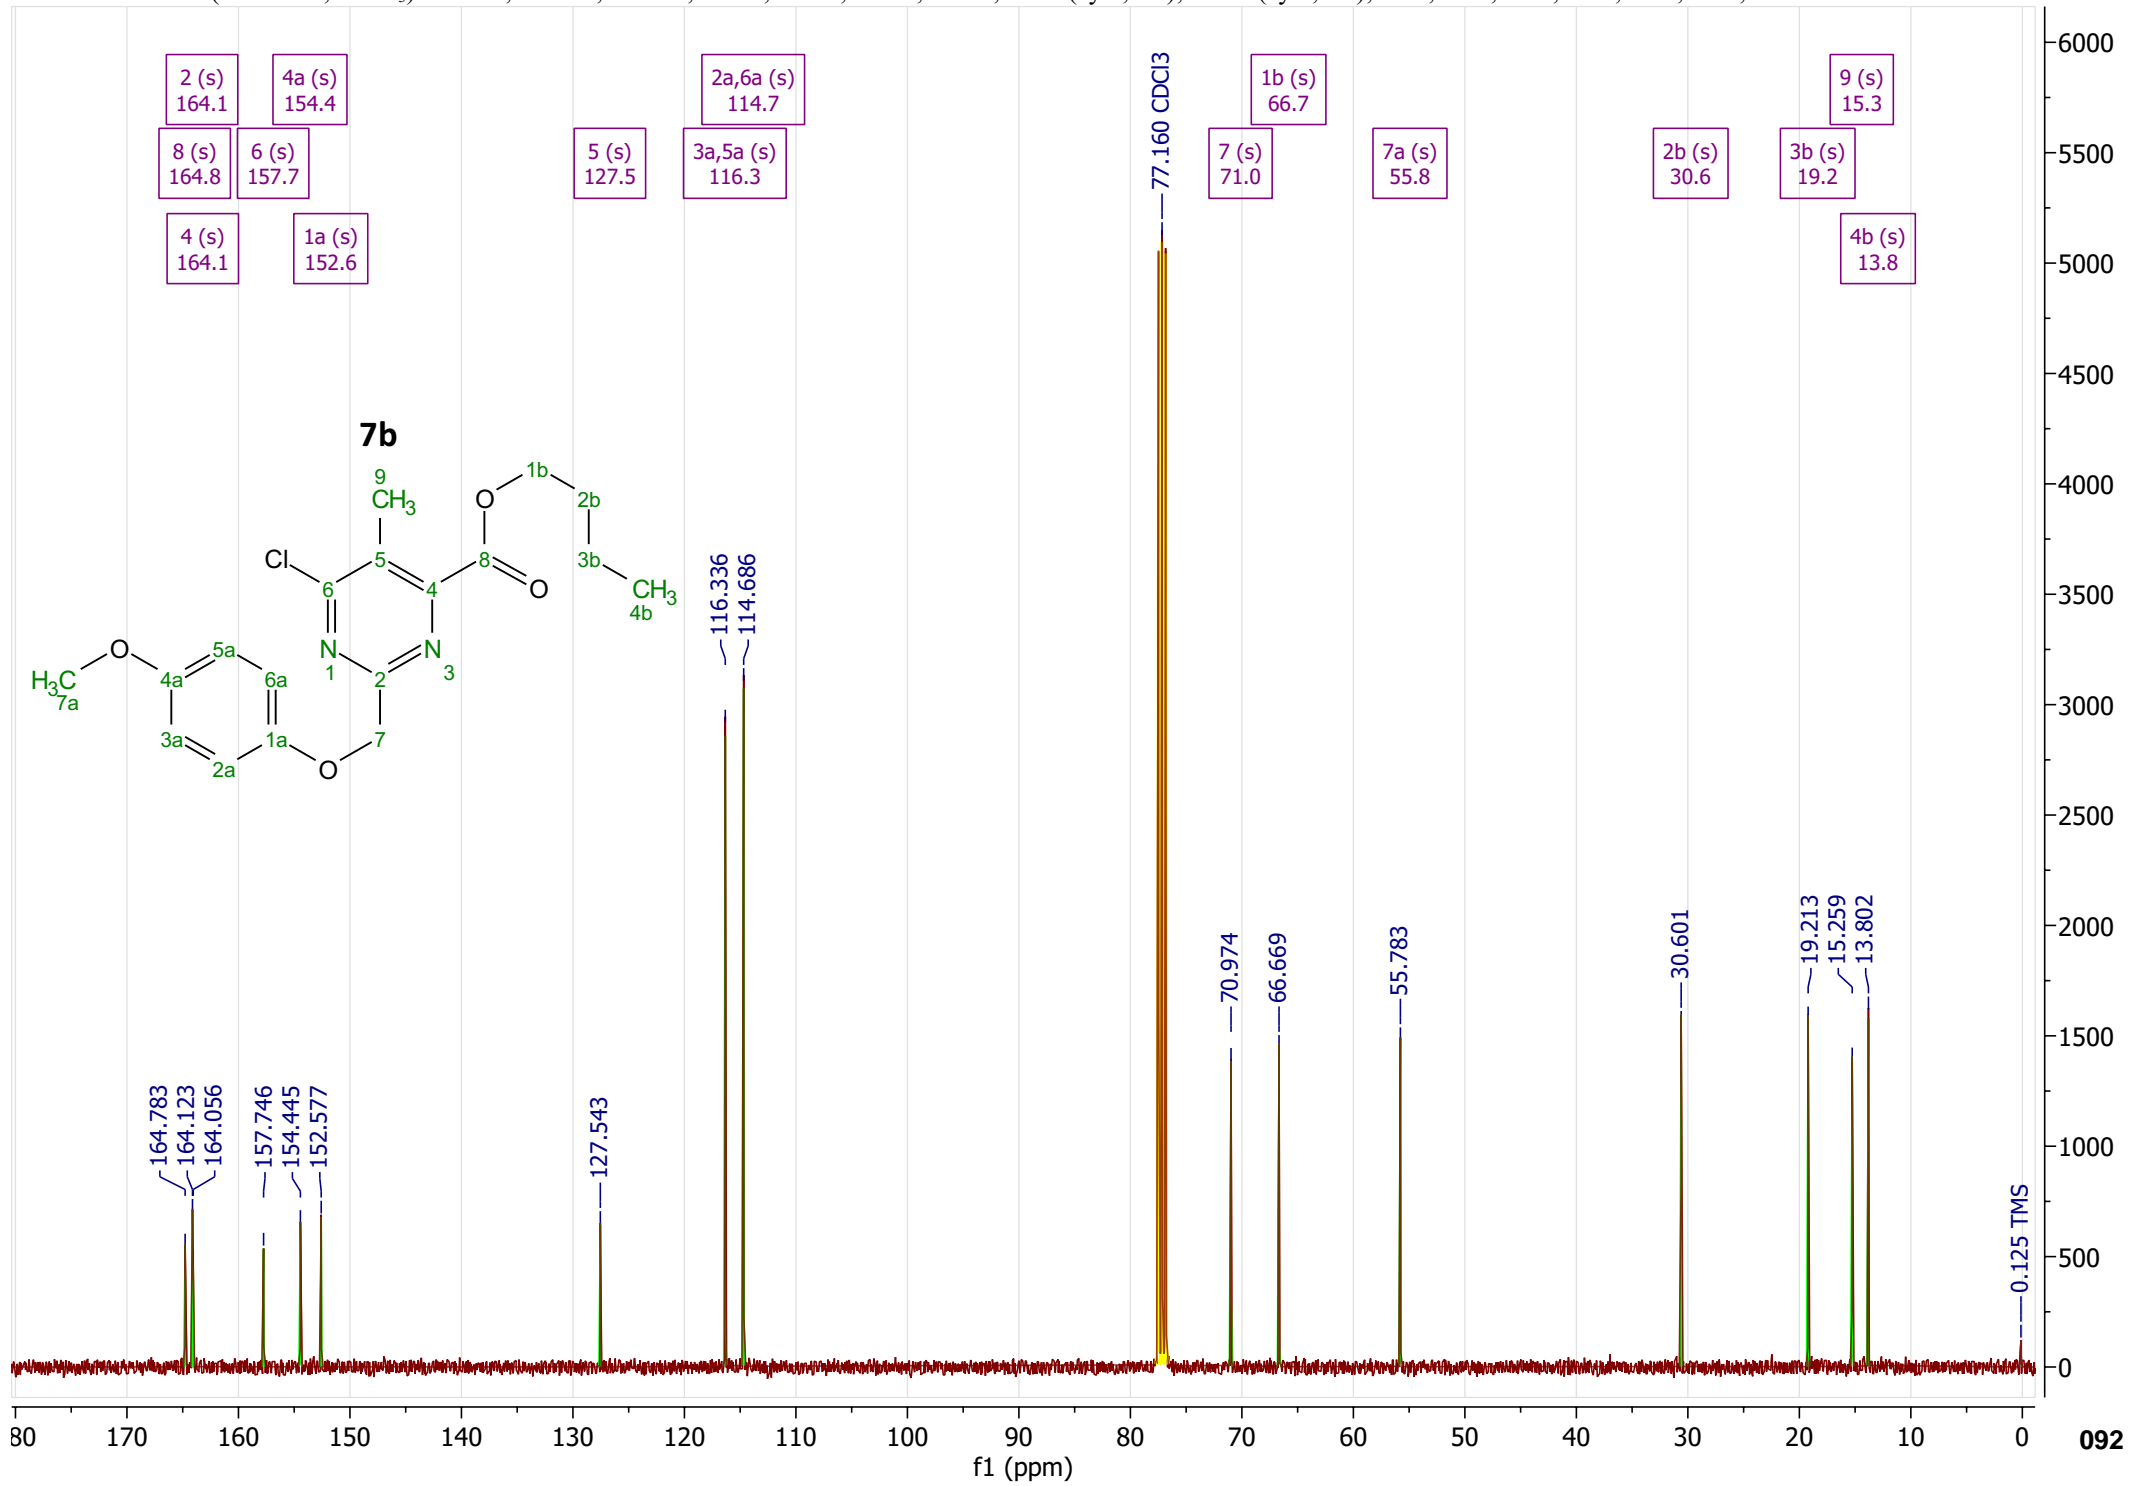

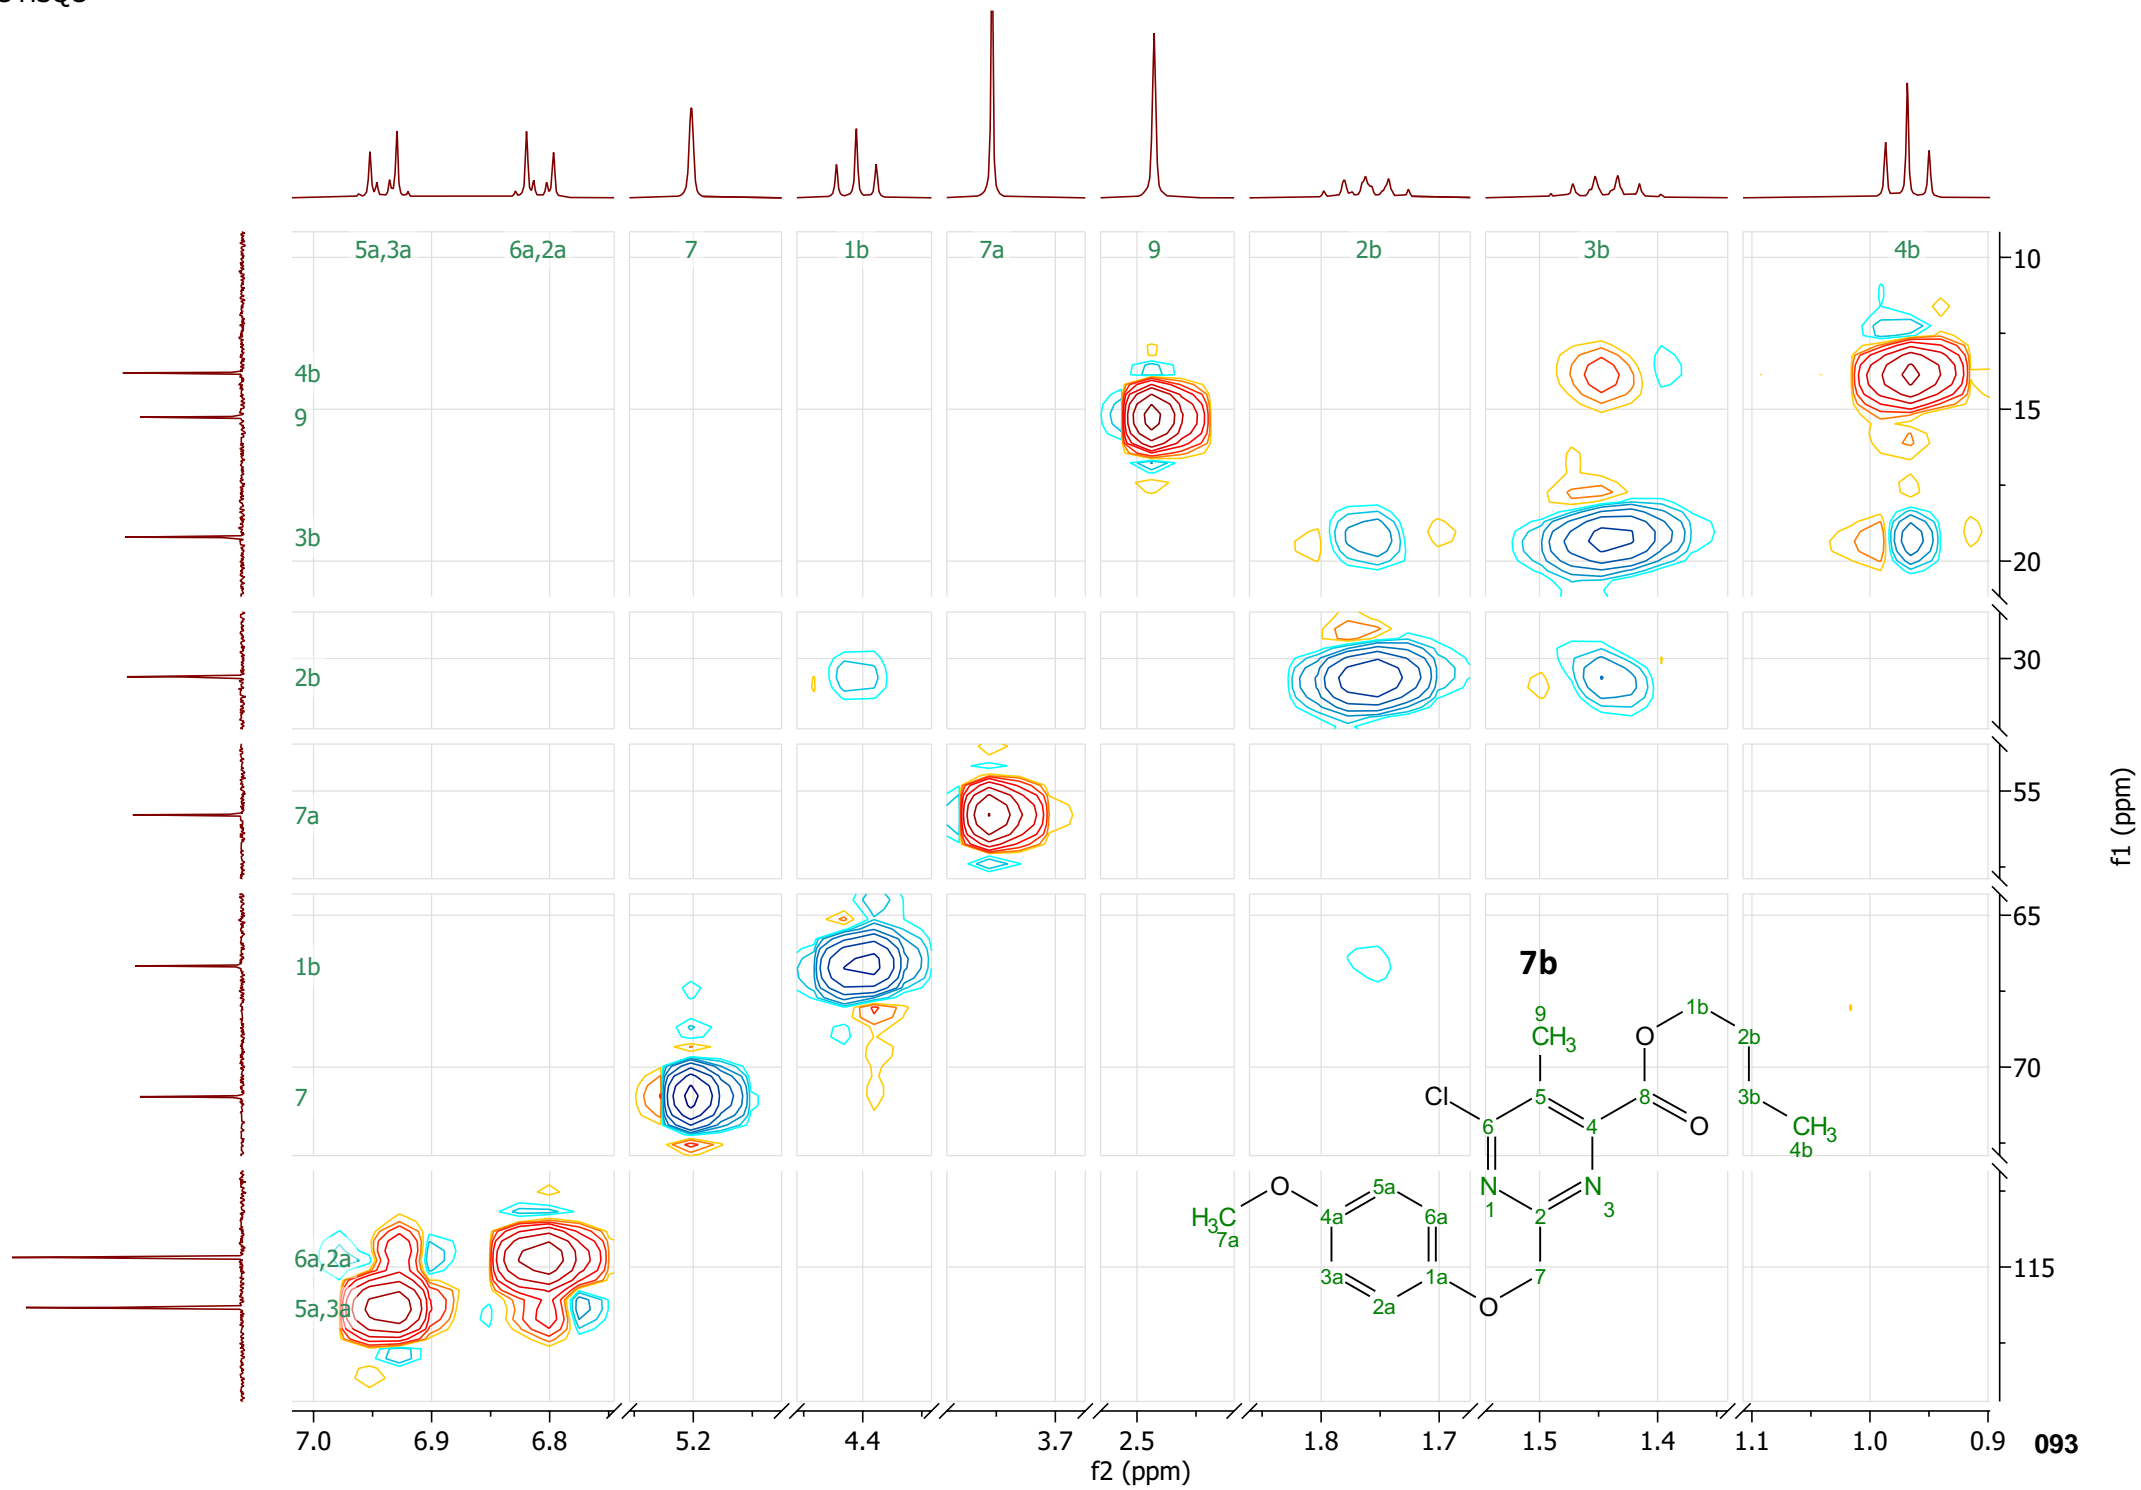

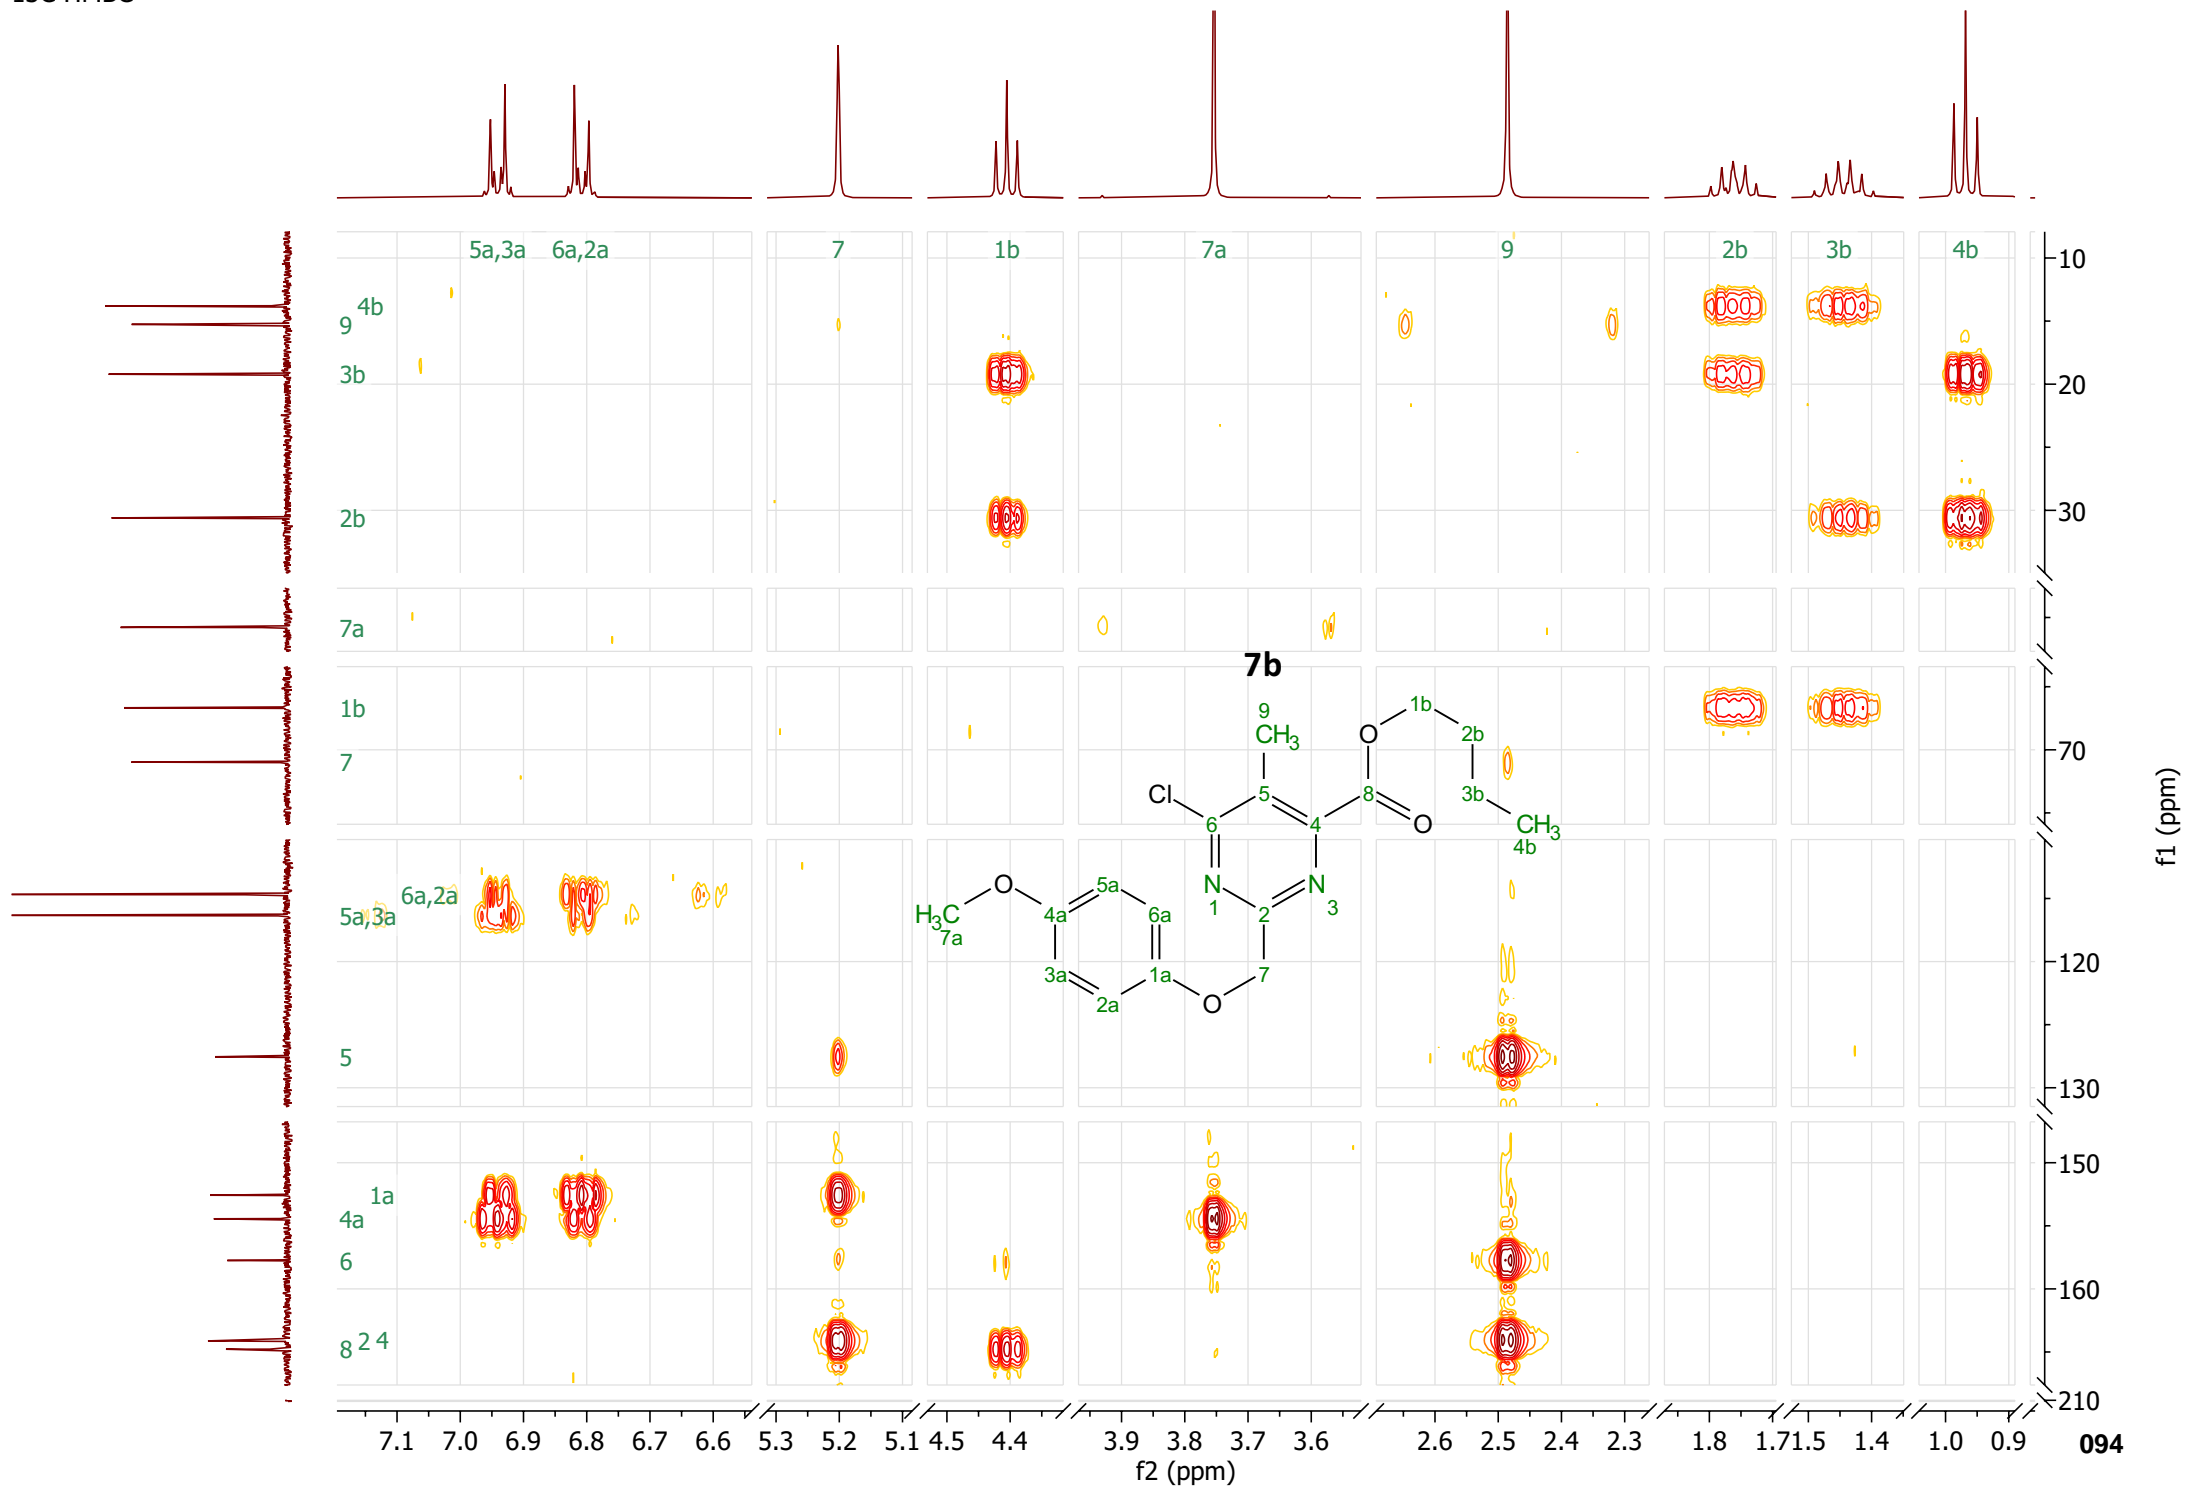

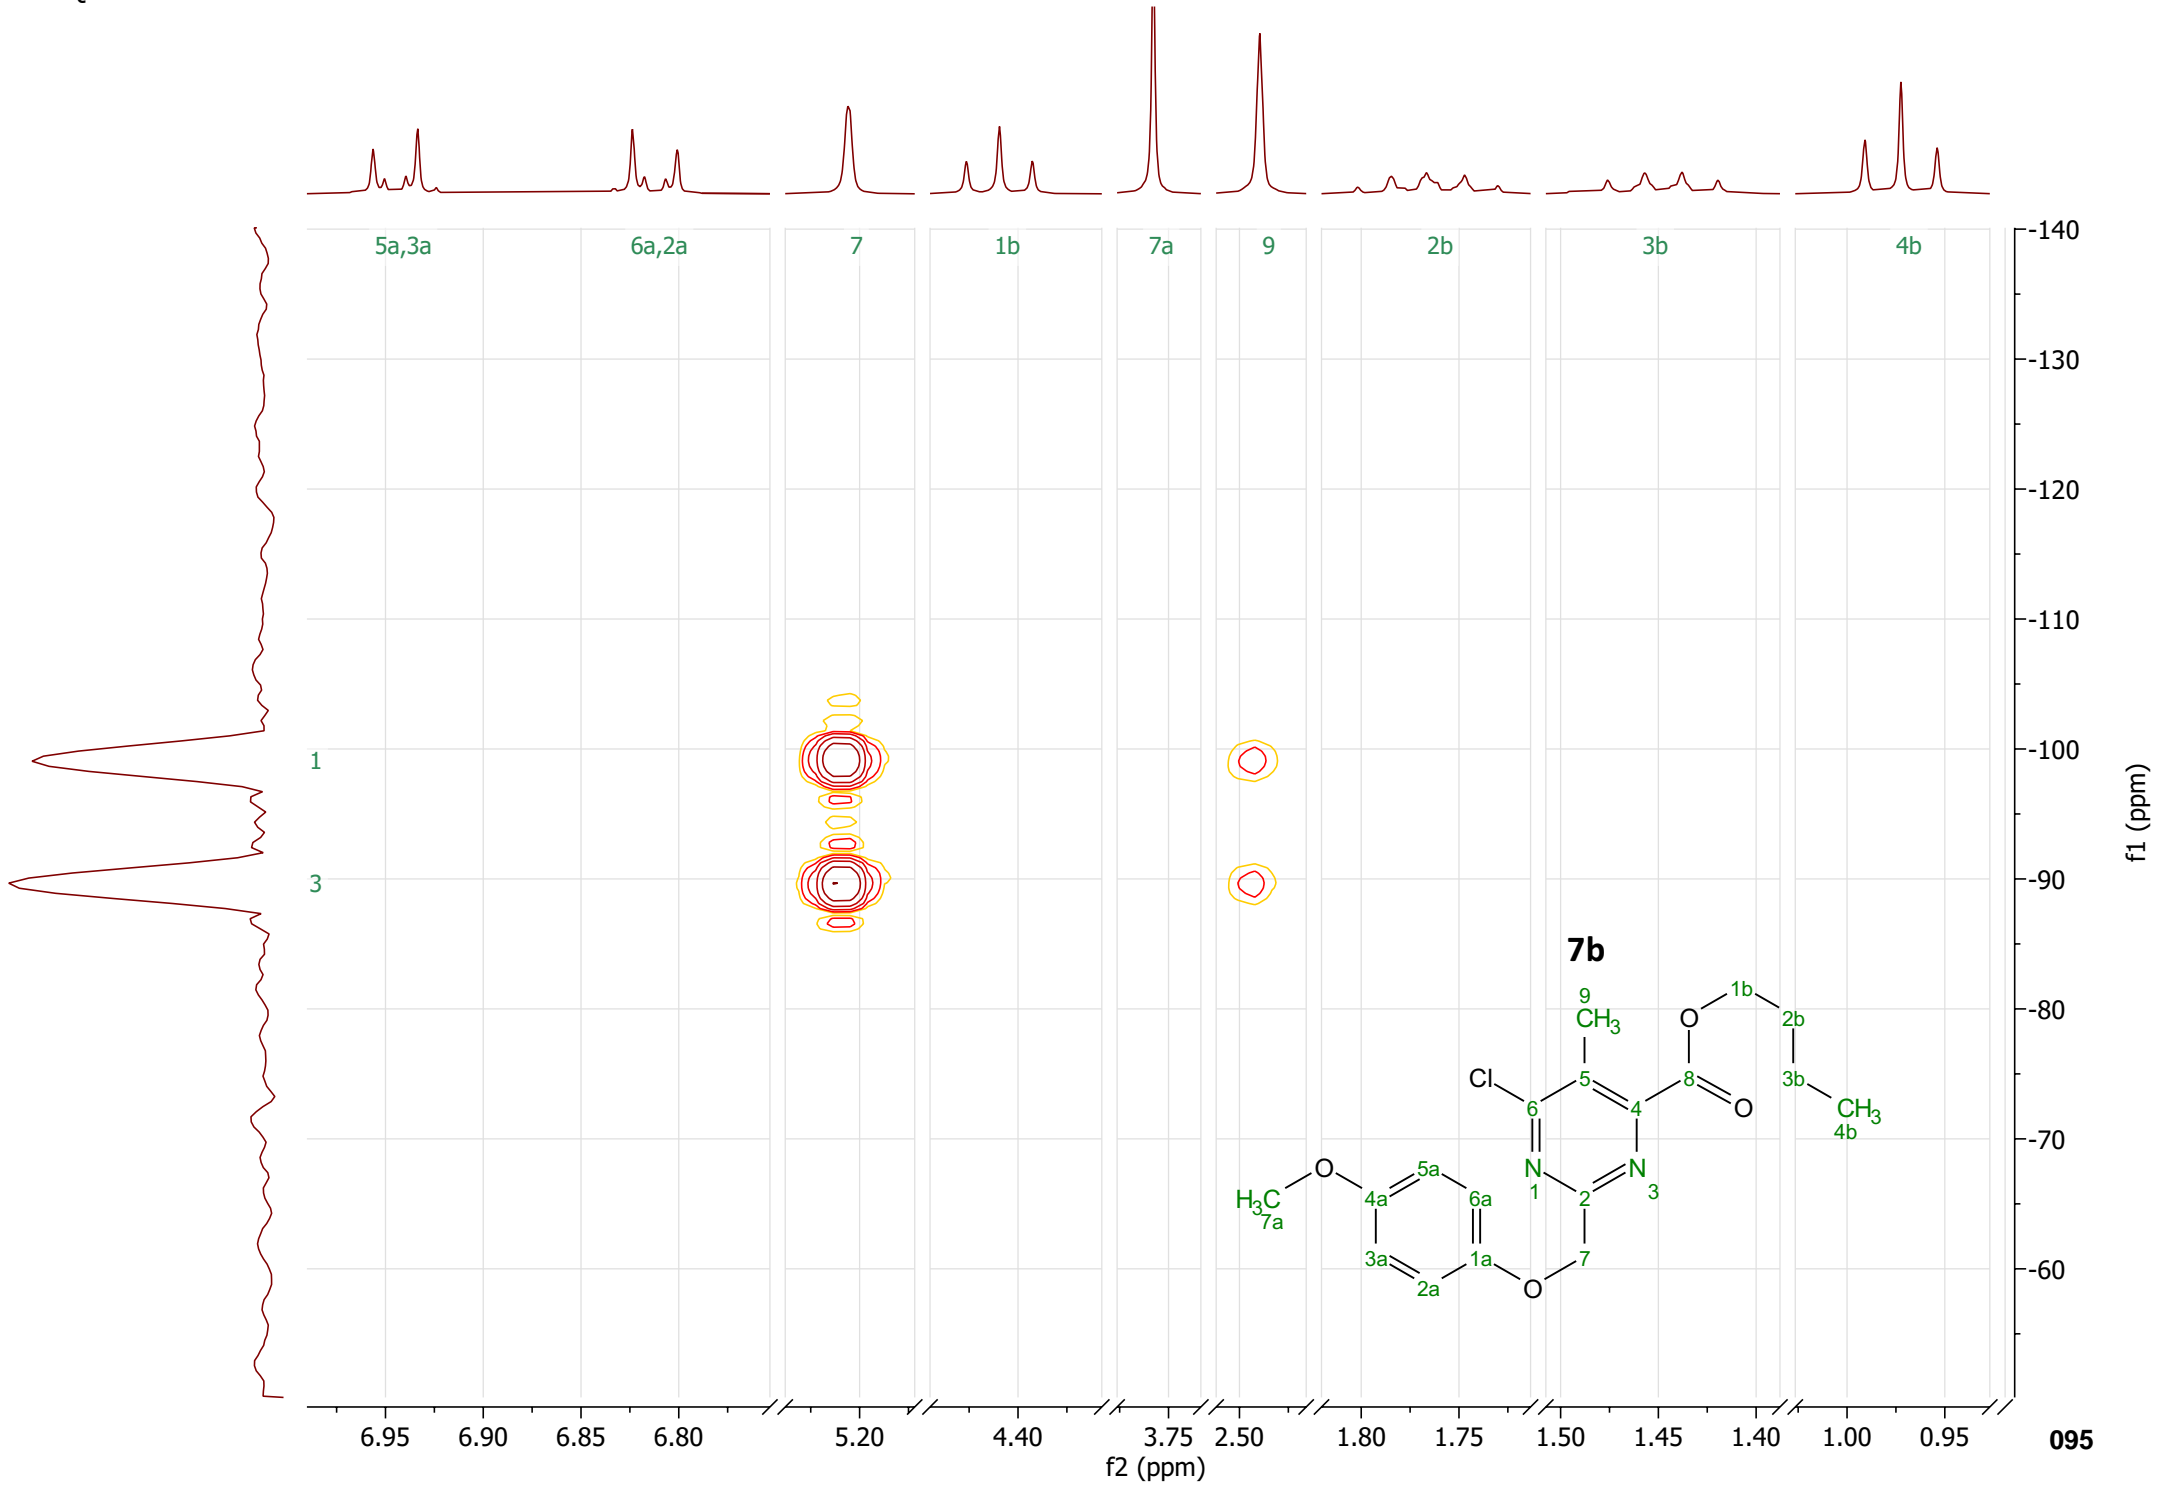

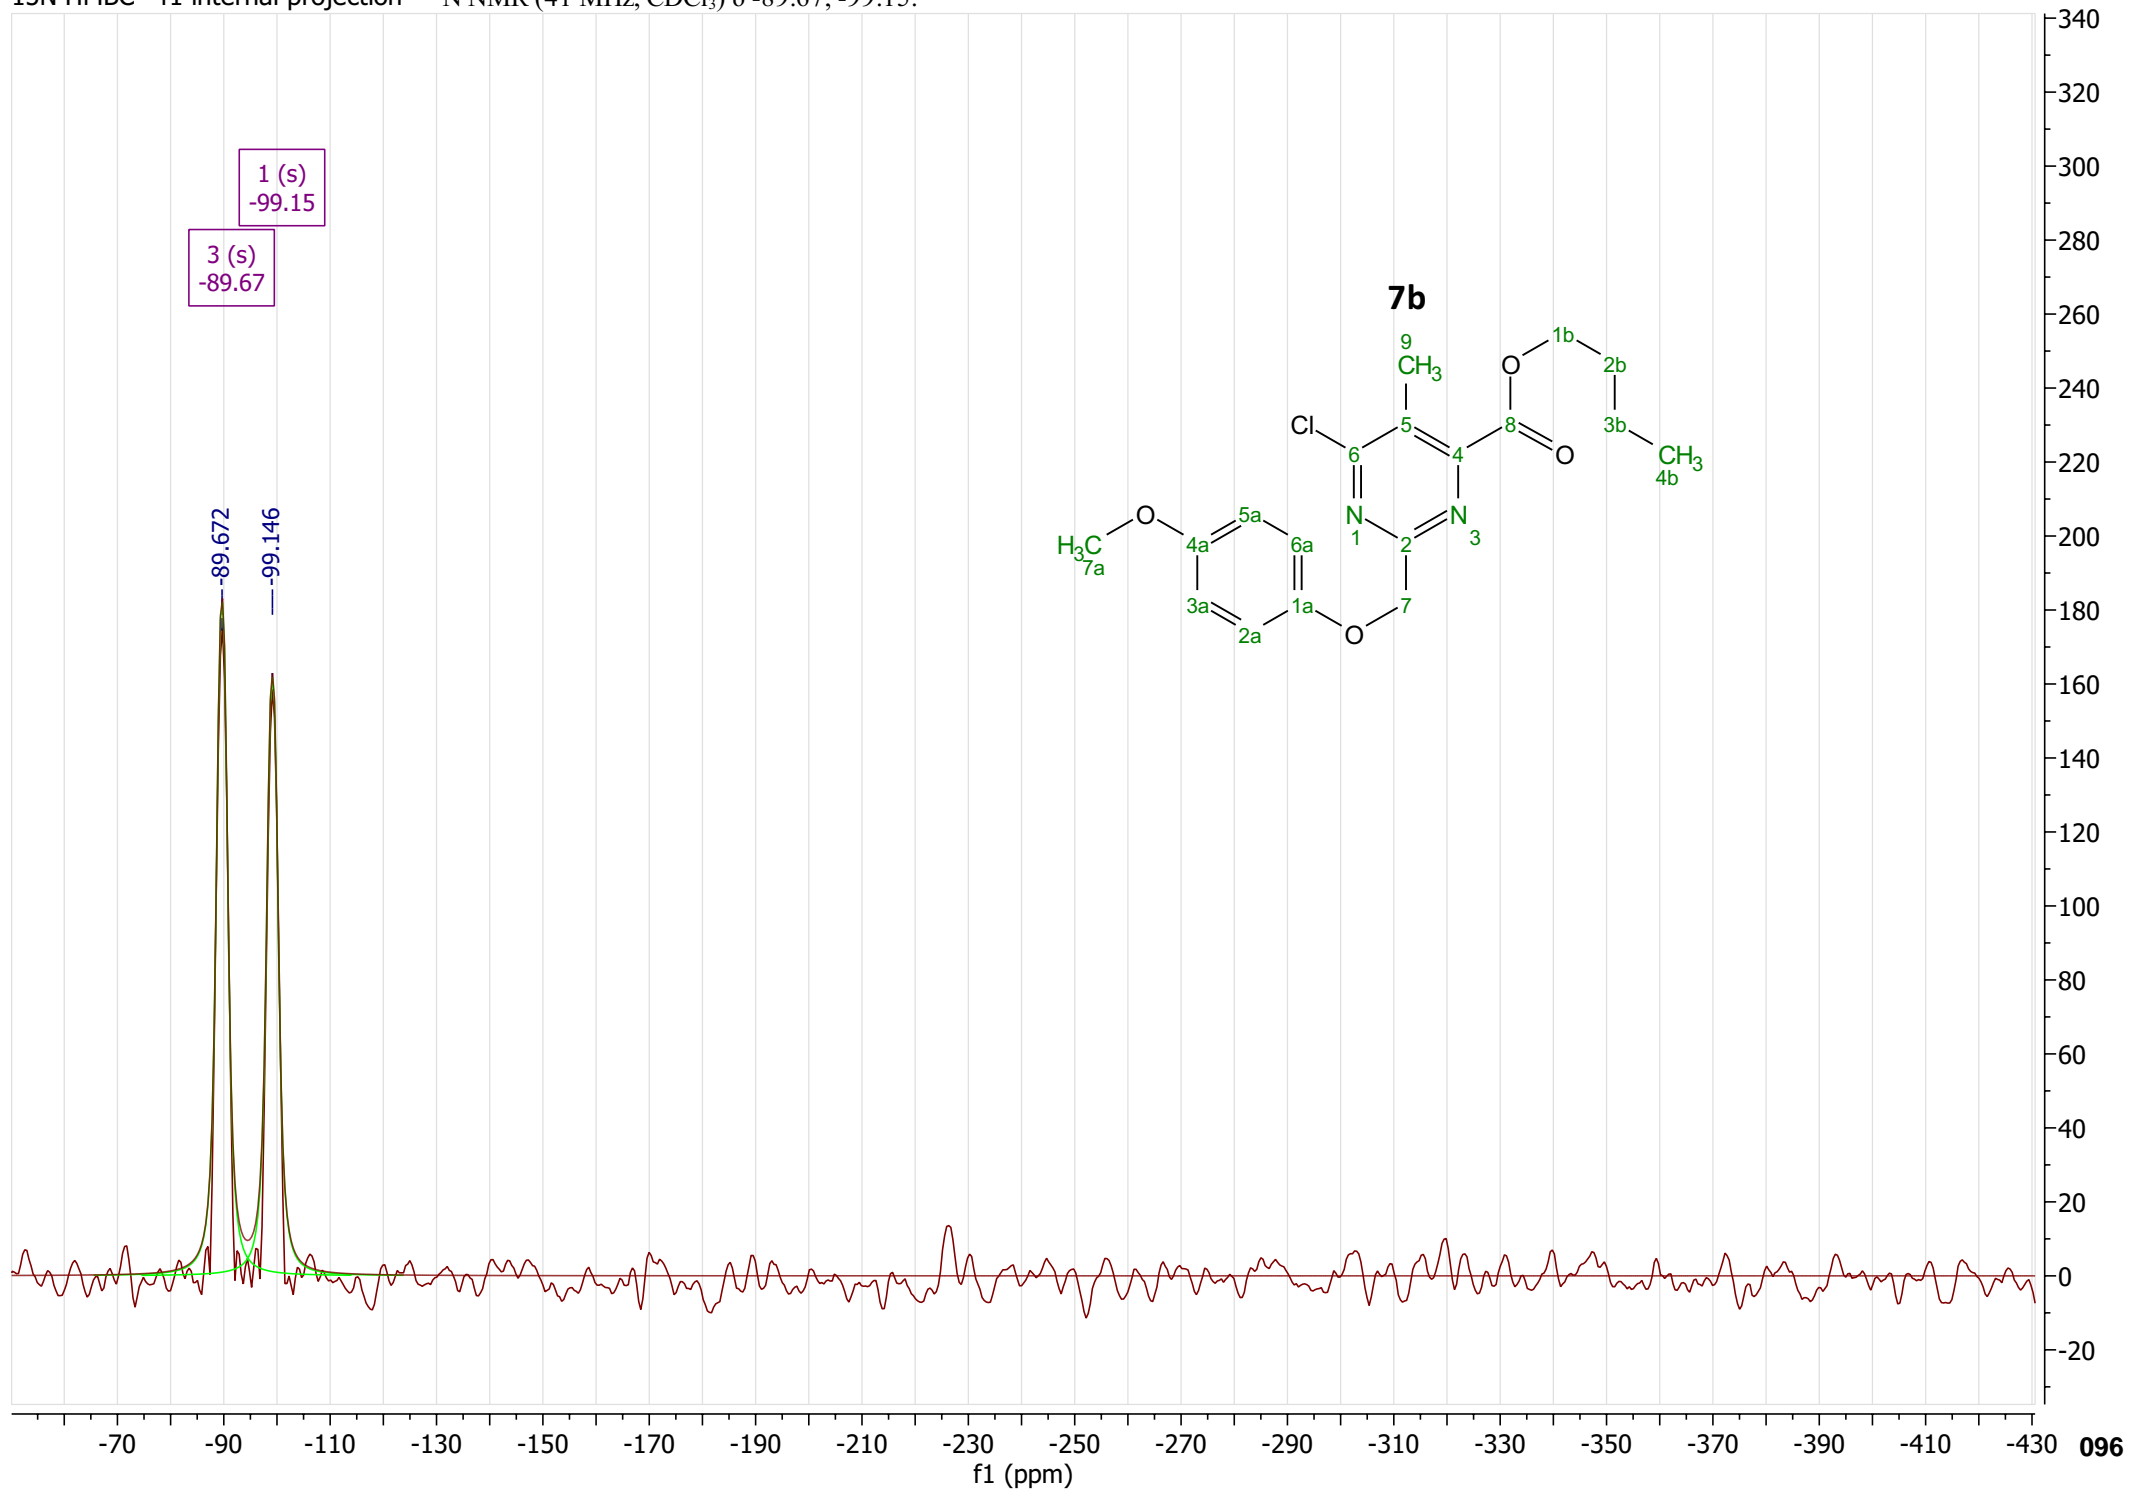



$^1\text{H}$  NMR (400 MHz,  $\text{CDCl}_3$ )  $\delta$  6.99 – 6.90 (m, 2H), 6.85 – 6.77 (m, 2H), 5.20 (app d,  $J = 0.7$  Hz, 2H), 4.40 (t,  $J = 6.8$  Hz, 2H), 3.76 (s, 3H), 2.49 (app t,  $J = 0.7$  Hz, 3H), 1.84 – 1.72 (m, 2H), 1.47 – 1.35 (m, 2H), 1.38 – 1.23 (m, 6H), 0.89 (app t,  $J = 6.9$  Hz, 3H).

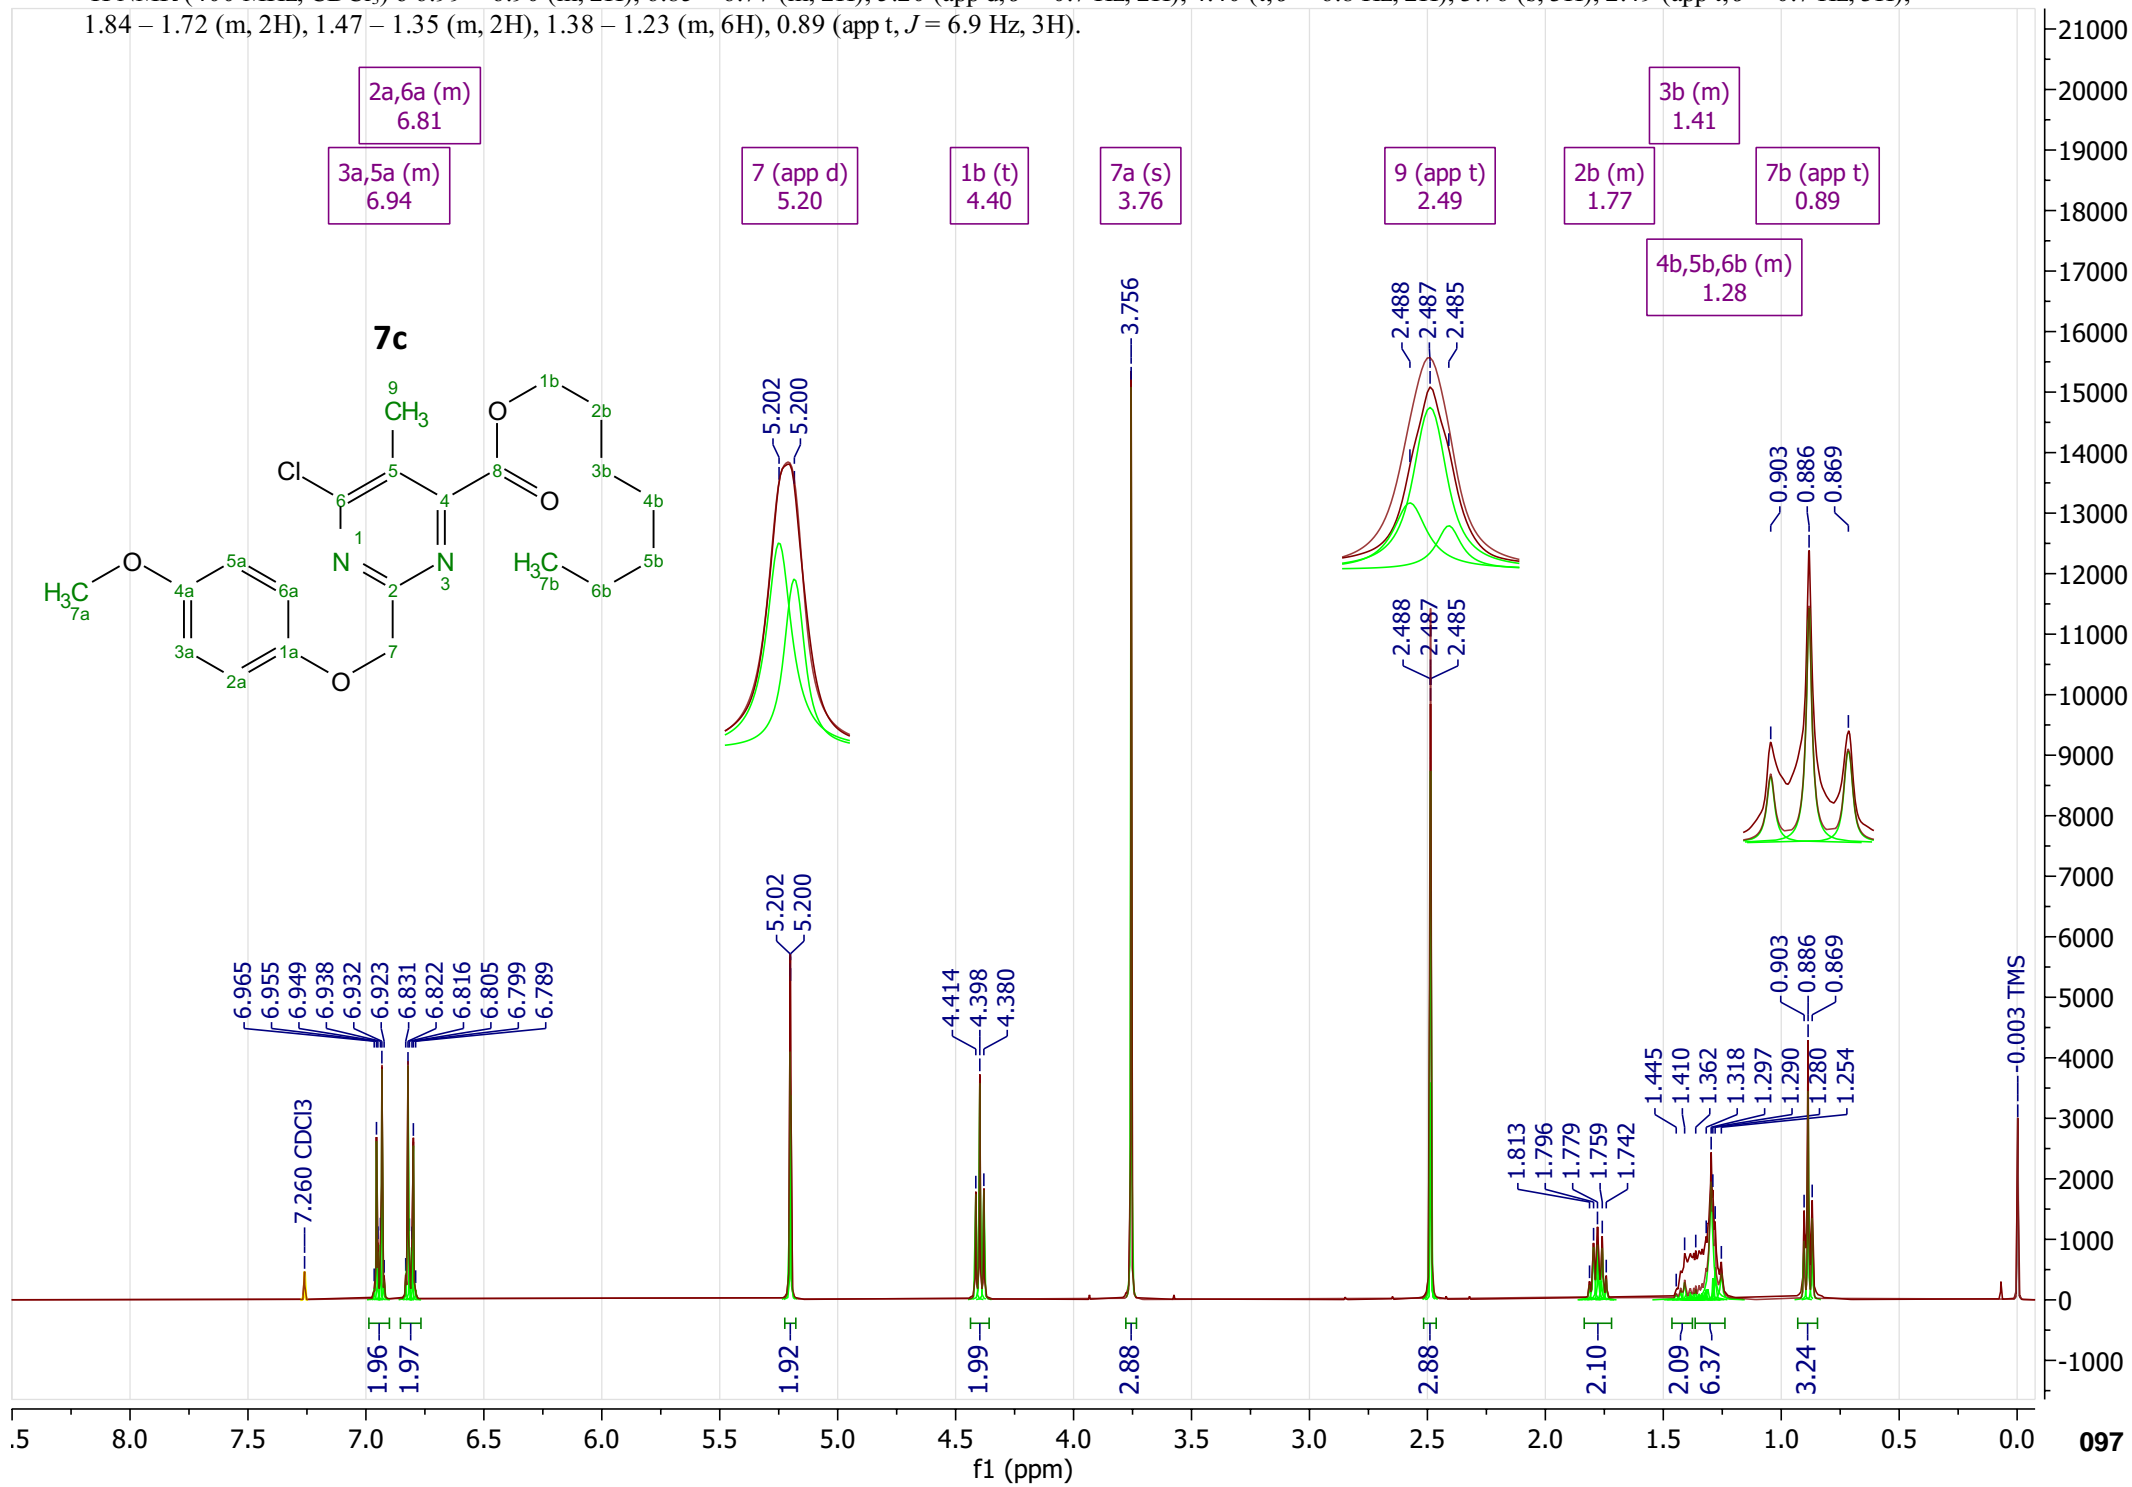

<sup>13</sup>C NMR (101 MHz, CDCl<sub>3</sub>) δ 164.8, 164.13, 164.07, 157.8, 154.5, 152.6, 127.5, 116.4 (sym, 2C), 114.7 (sym, 2C), 71.0, 67.0, 55.8, 31.8, 29.0, 28.6, 25.9, 22.7, 15.3, 14.2.

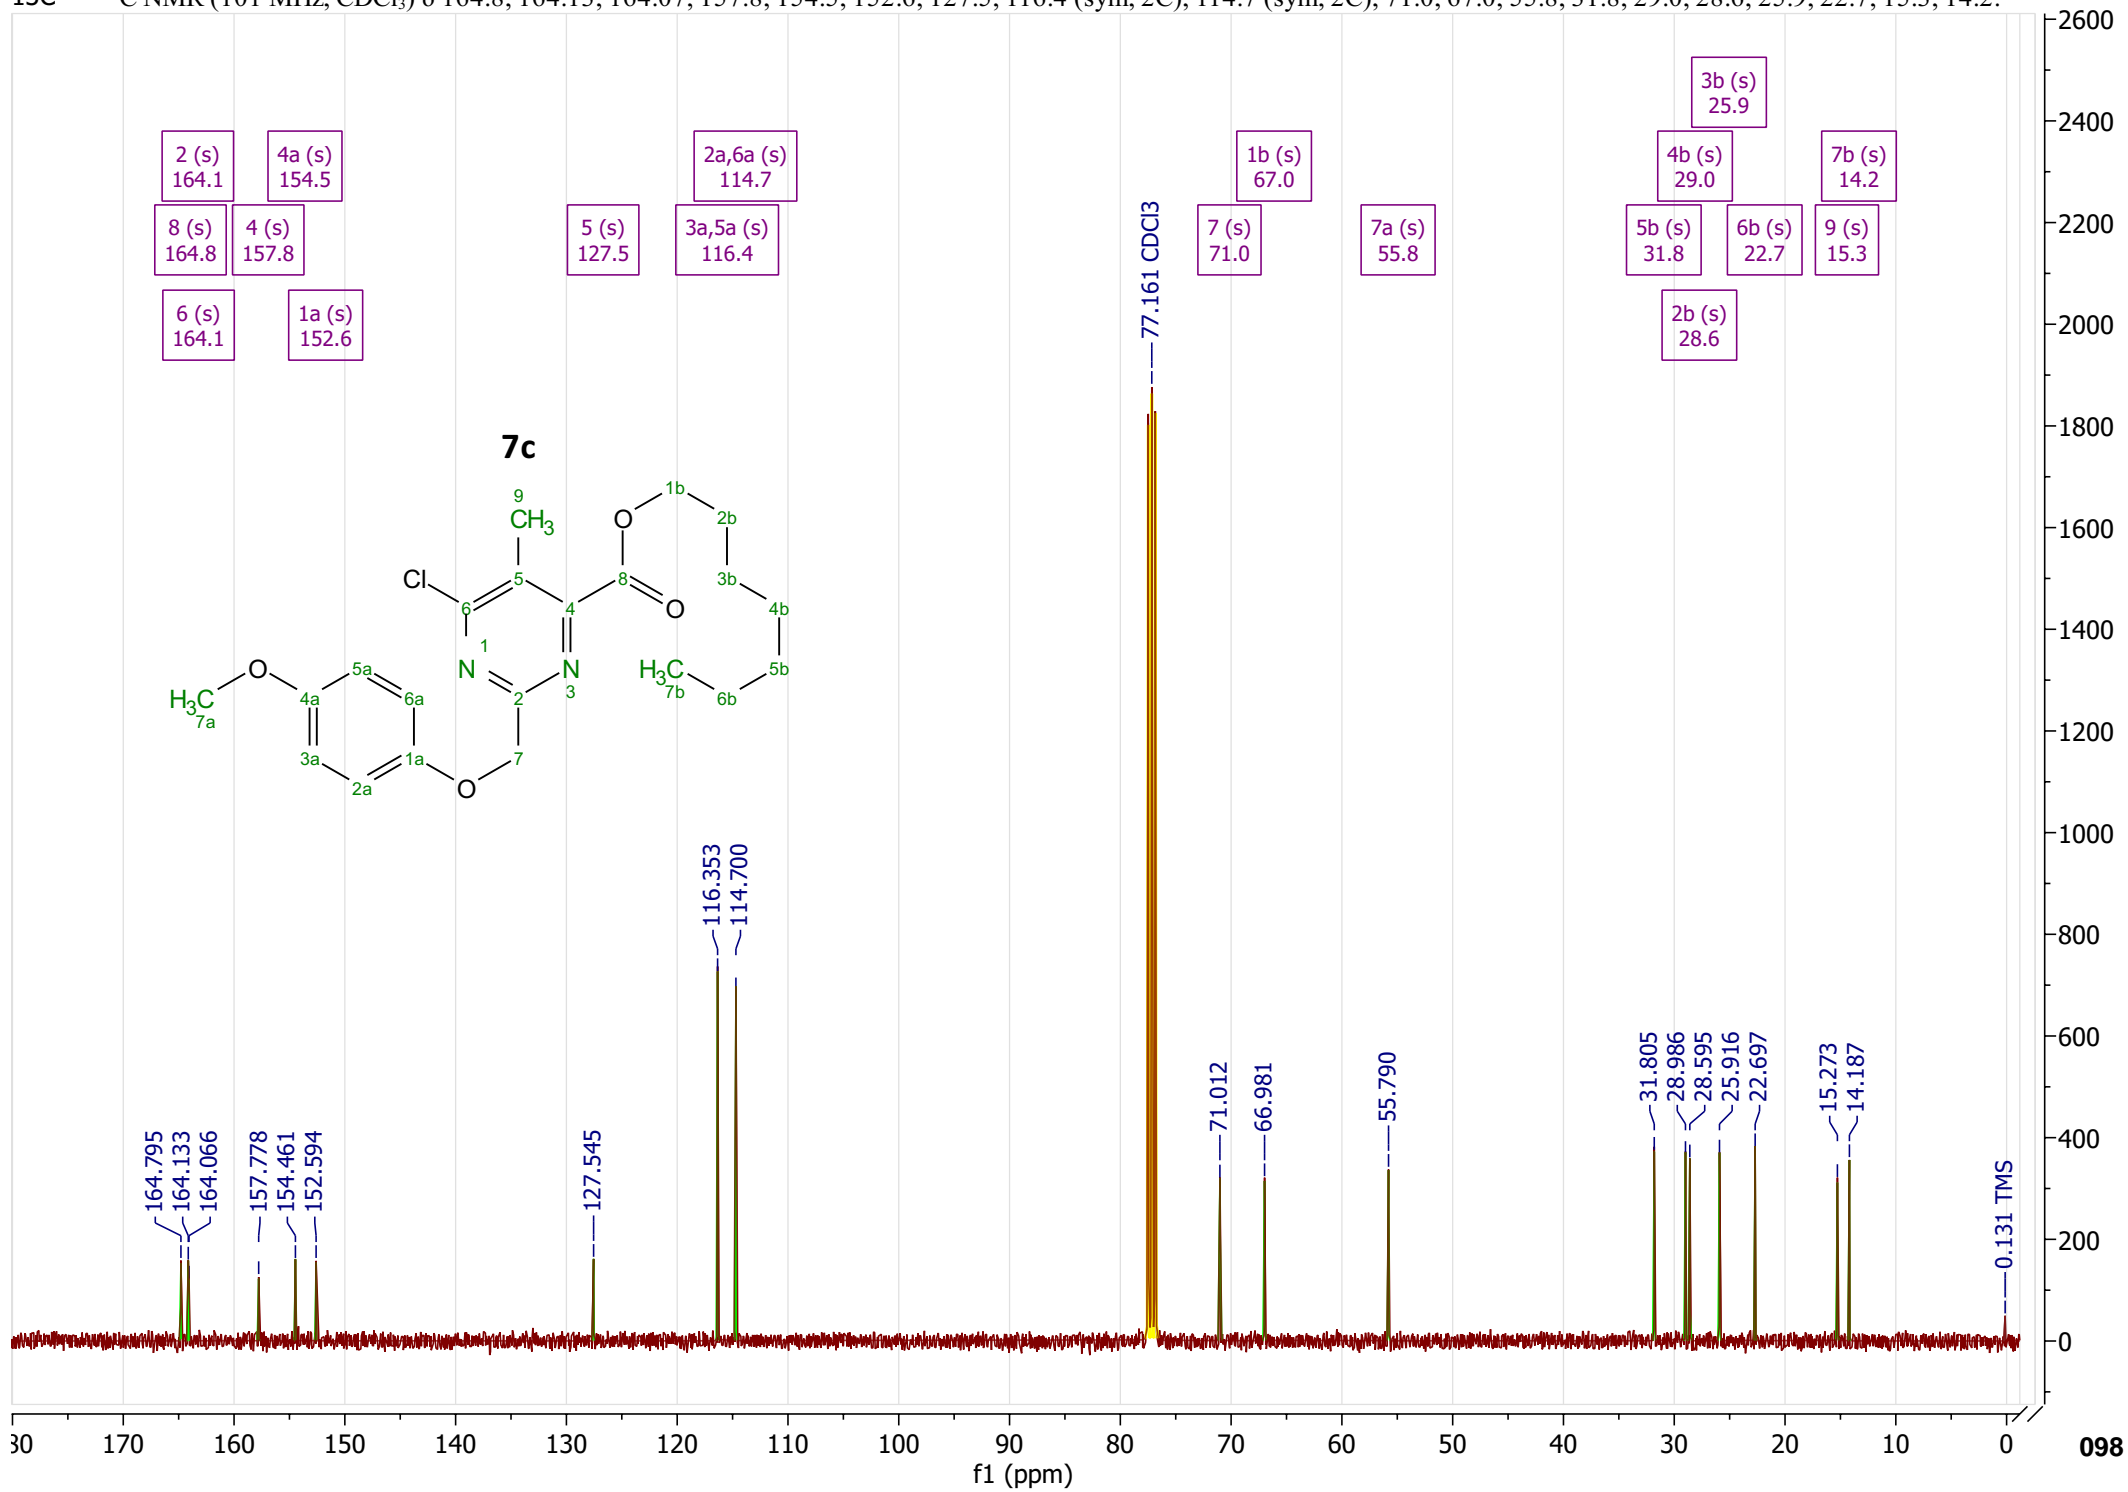

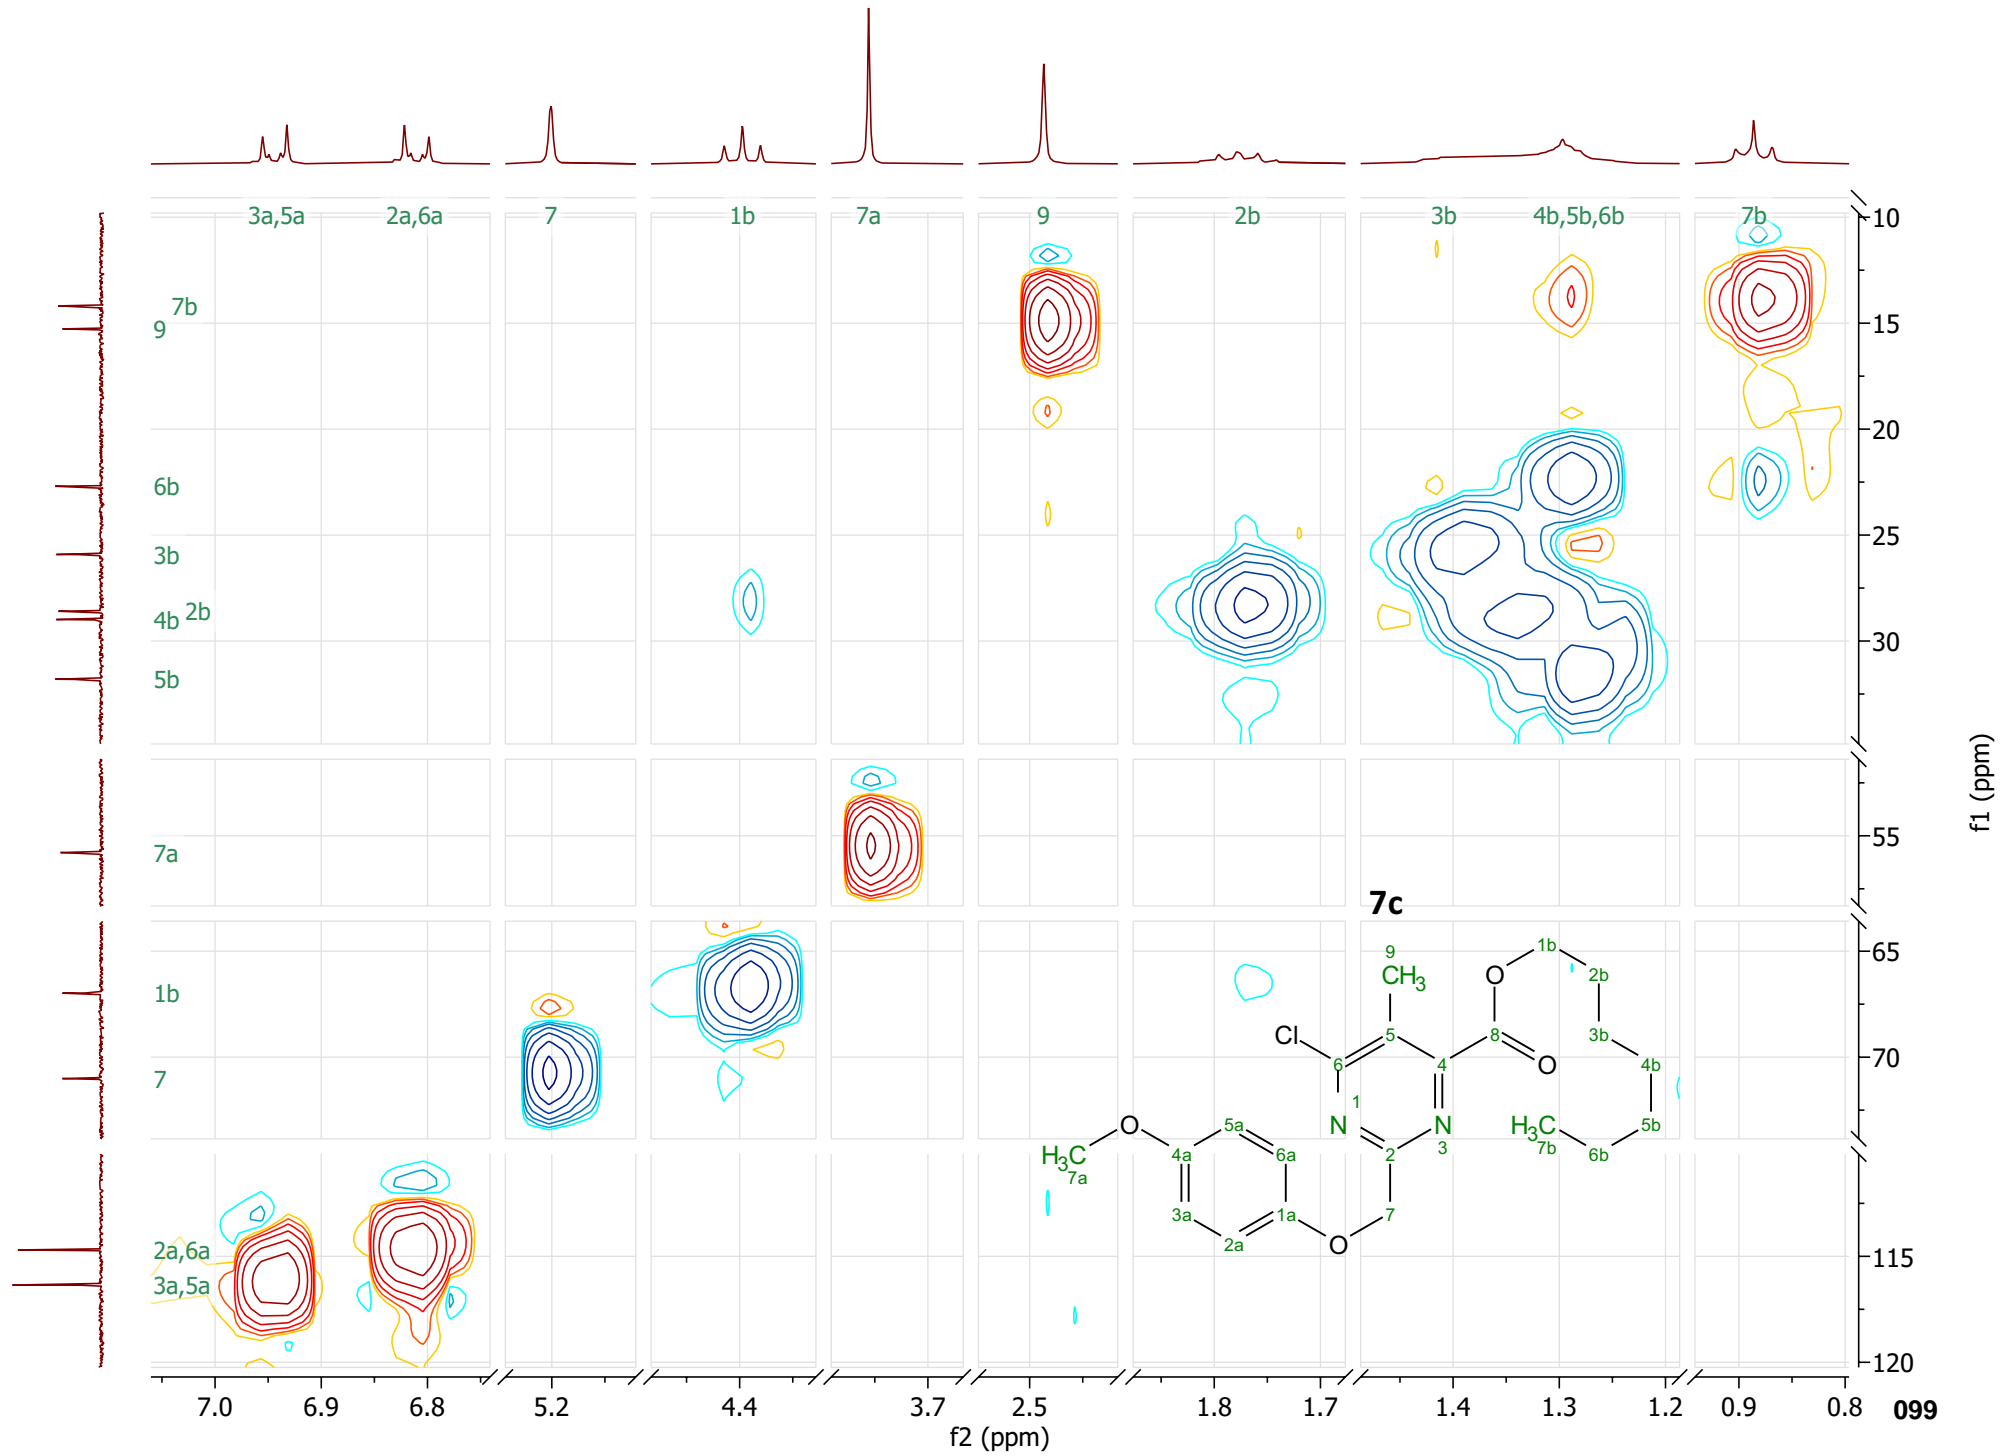

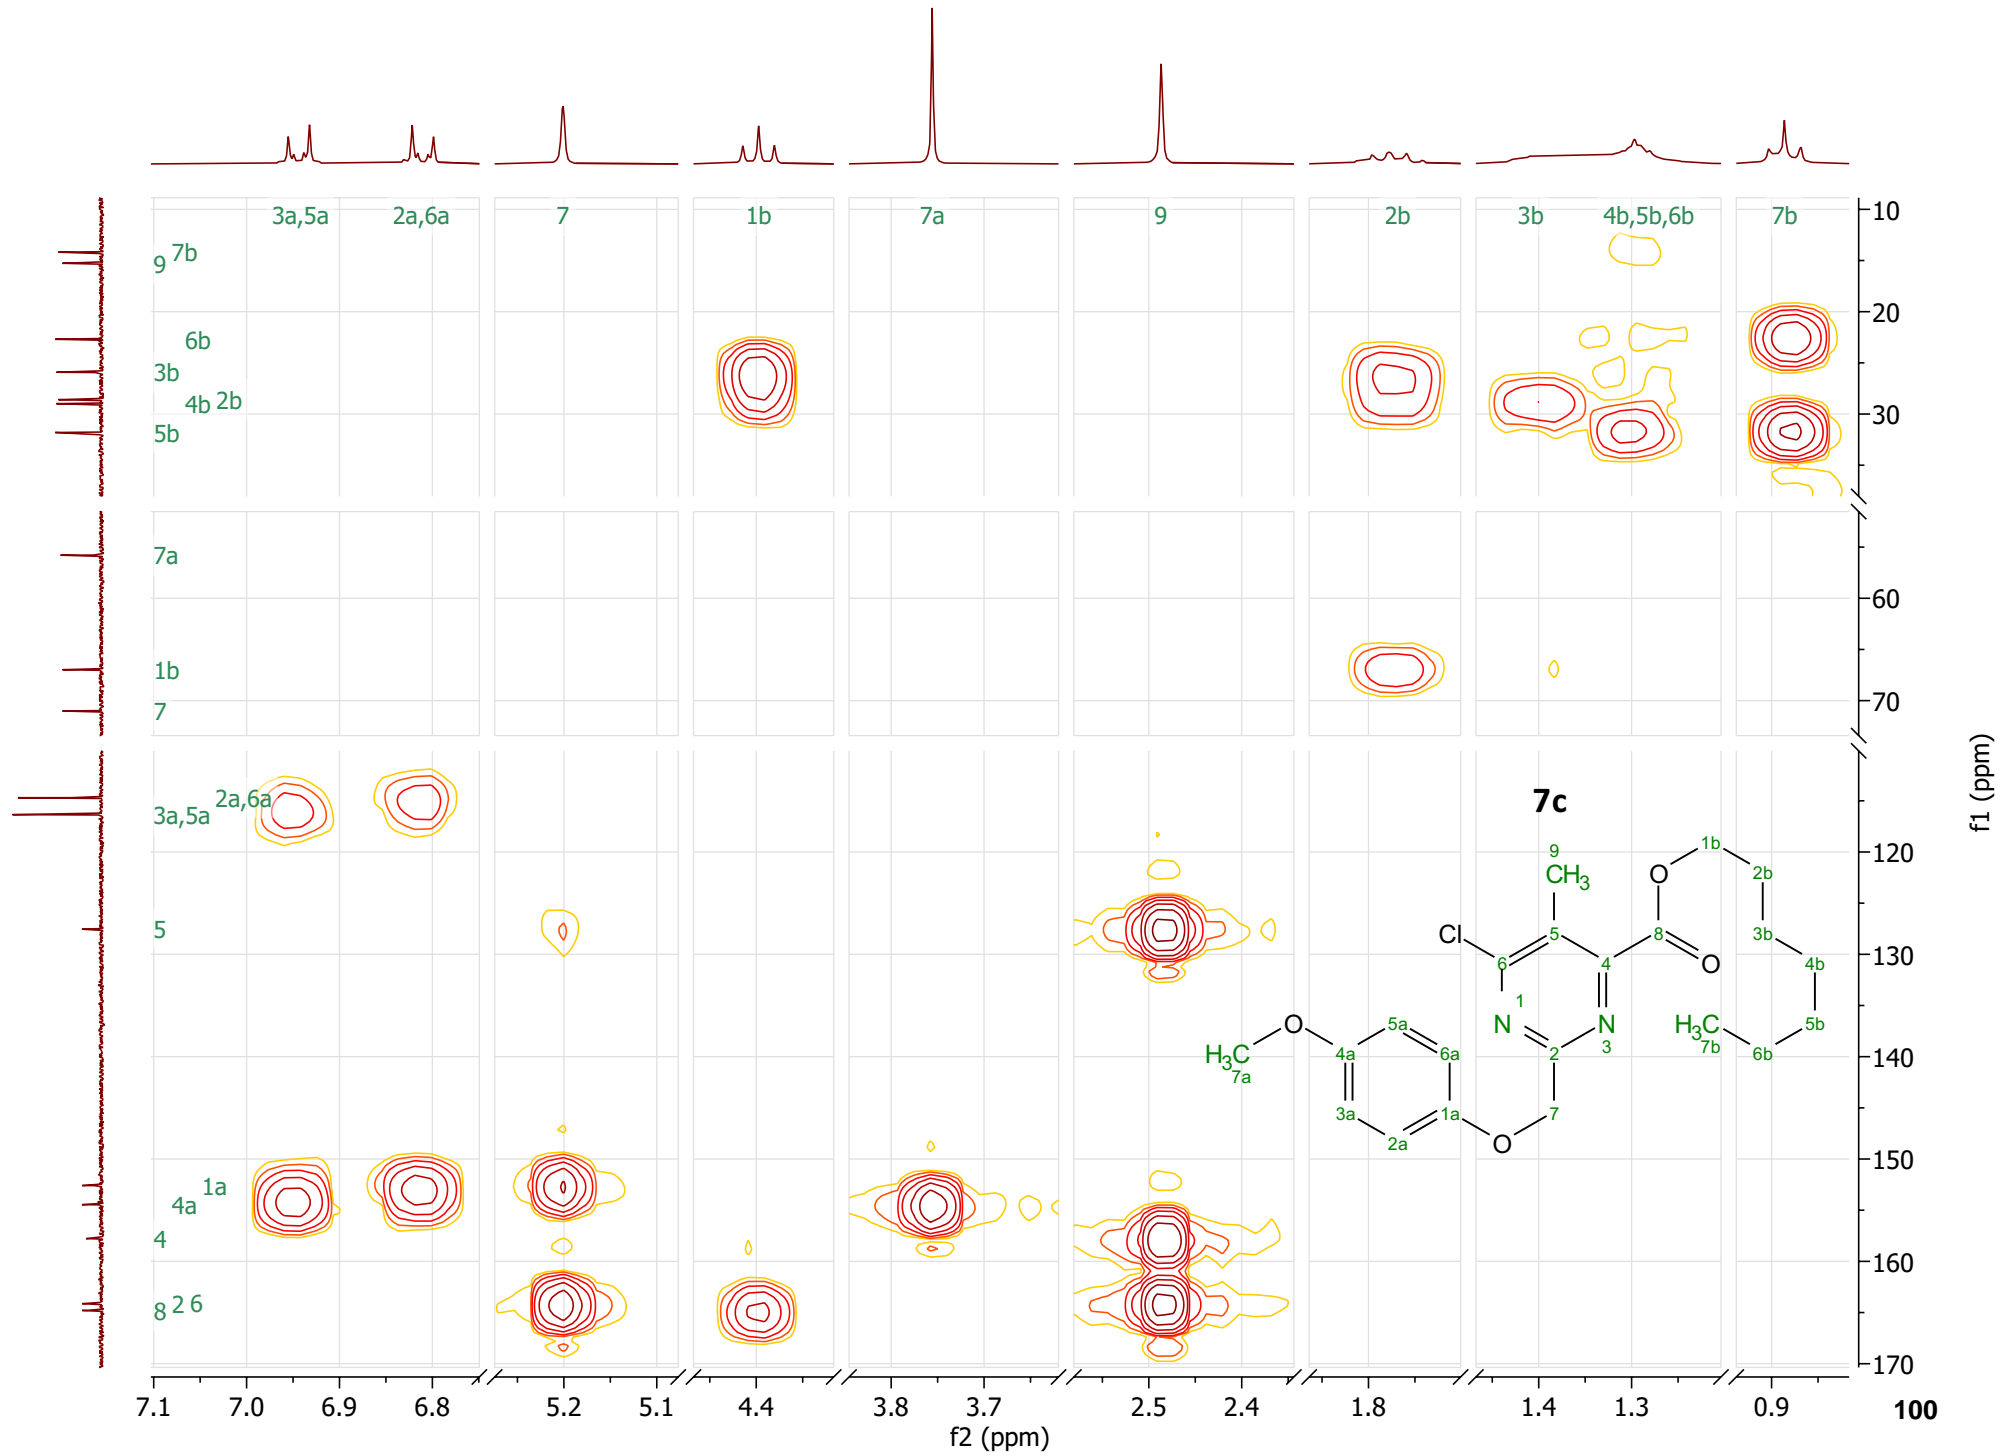

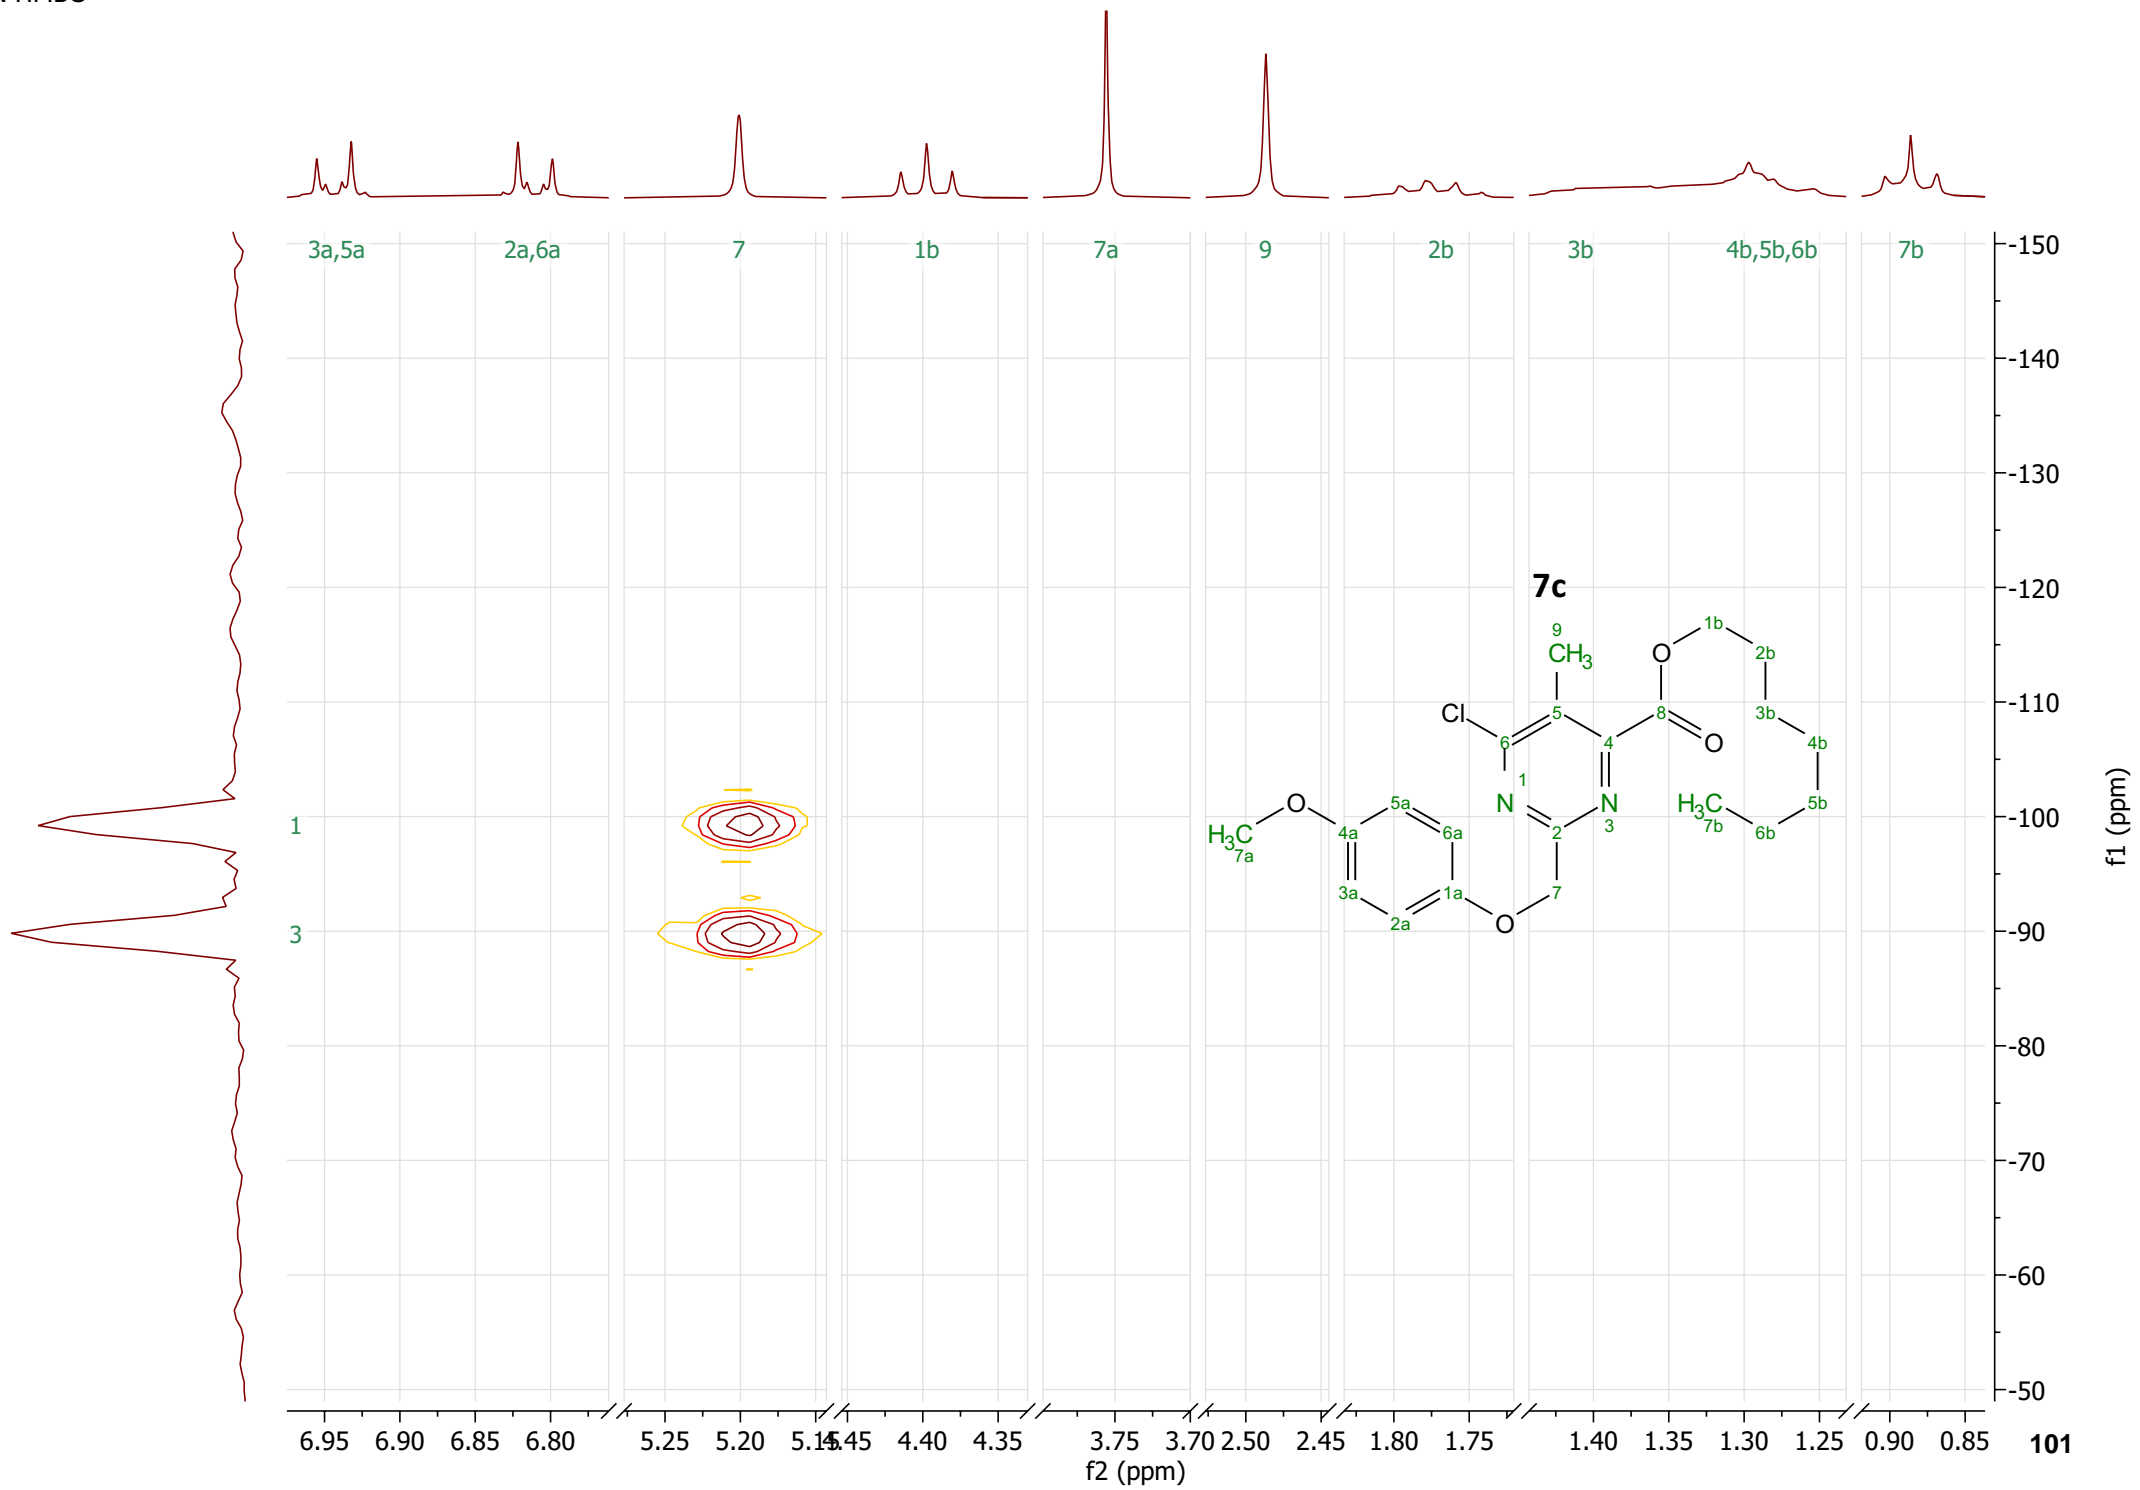

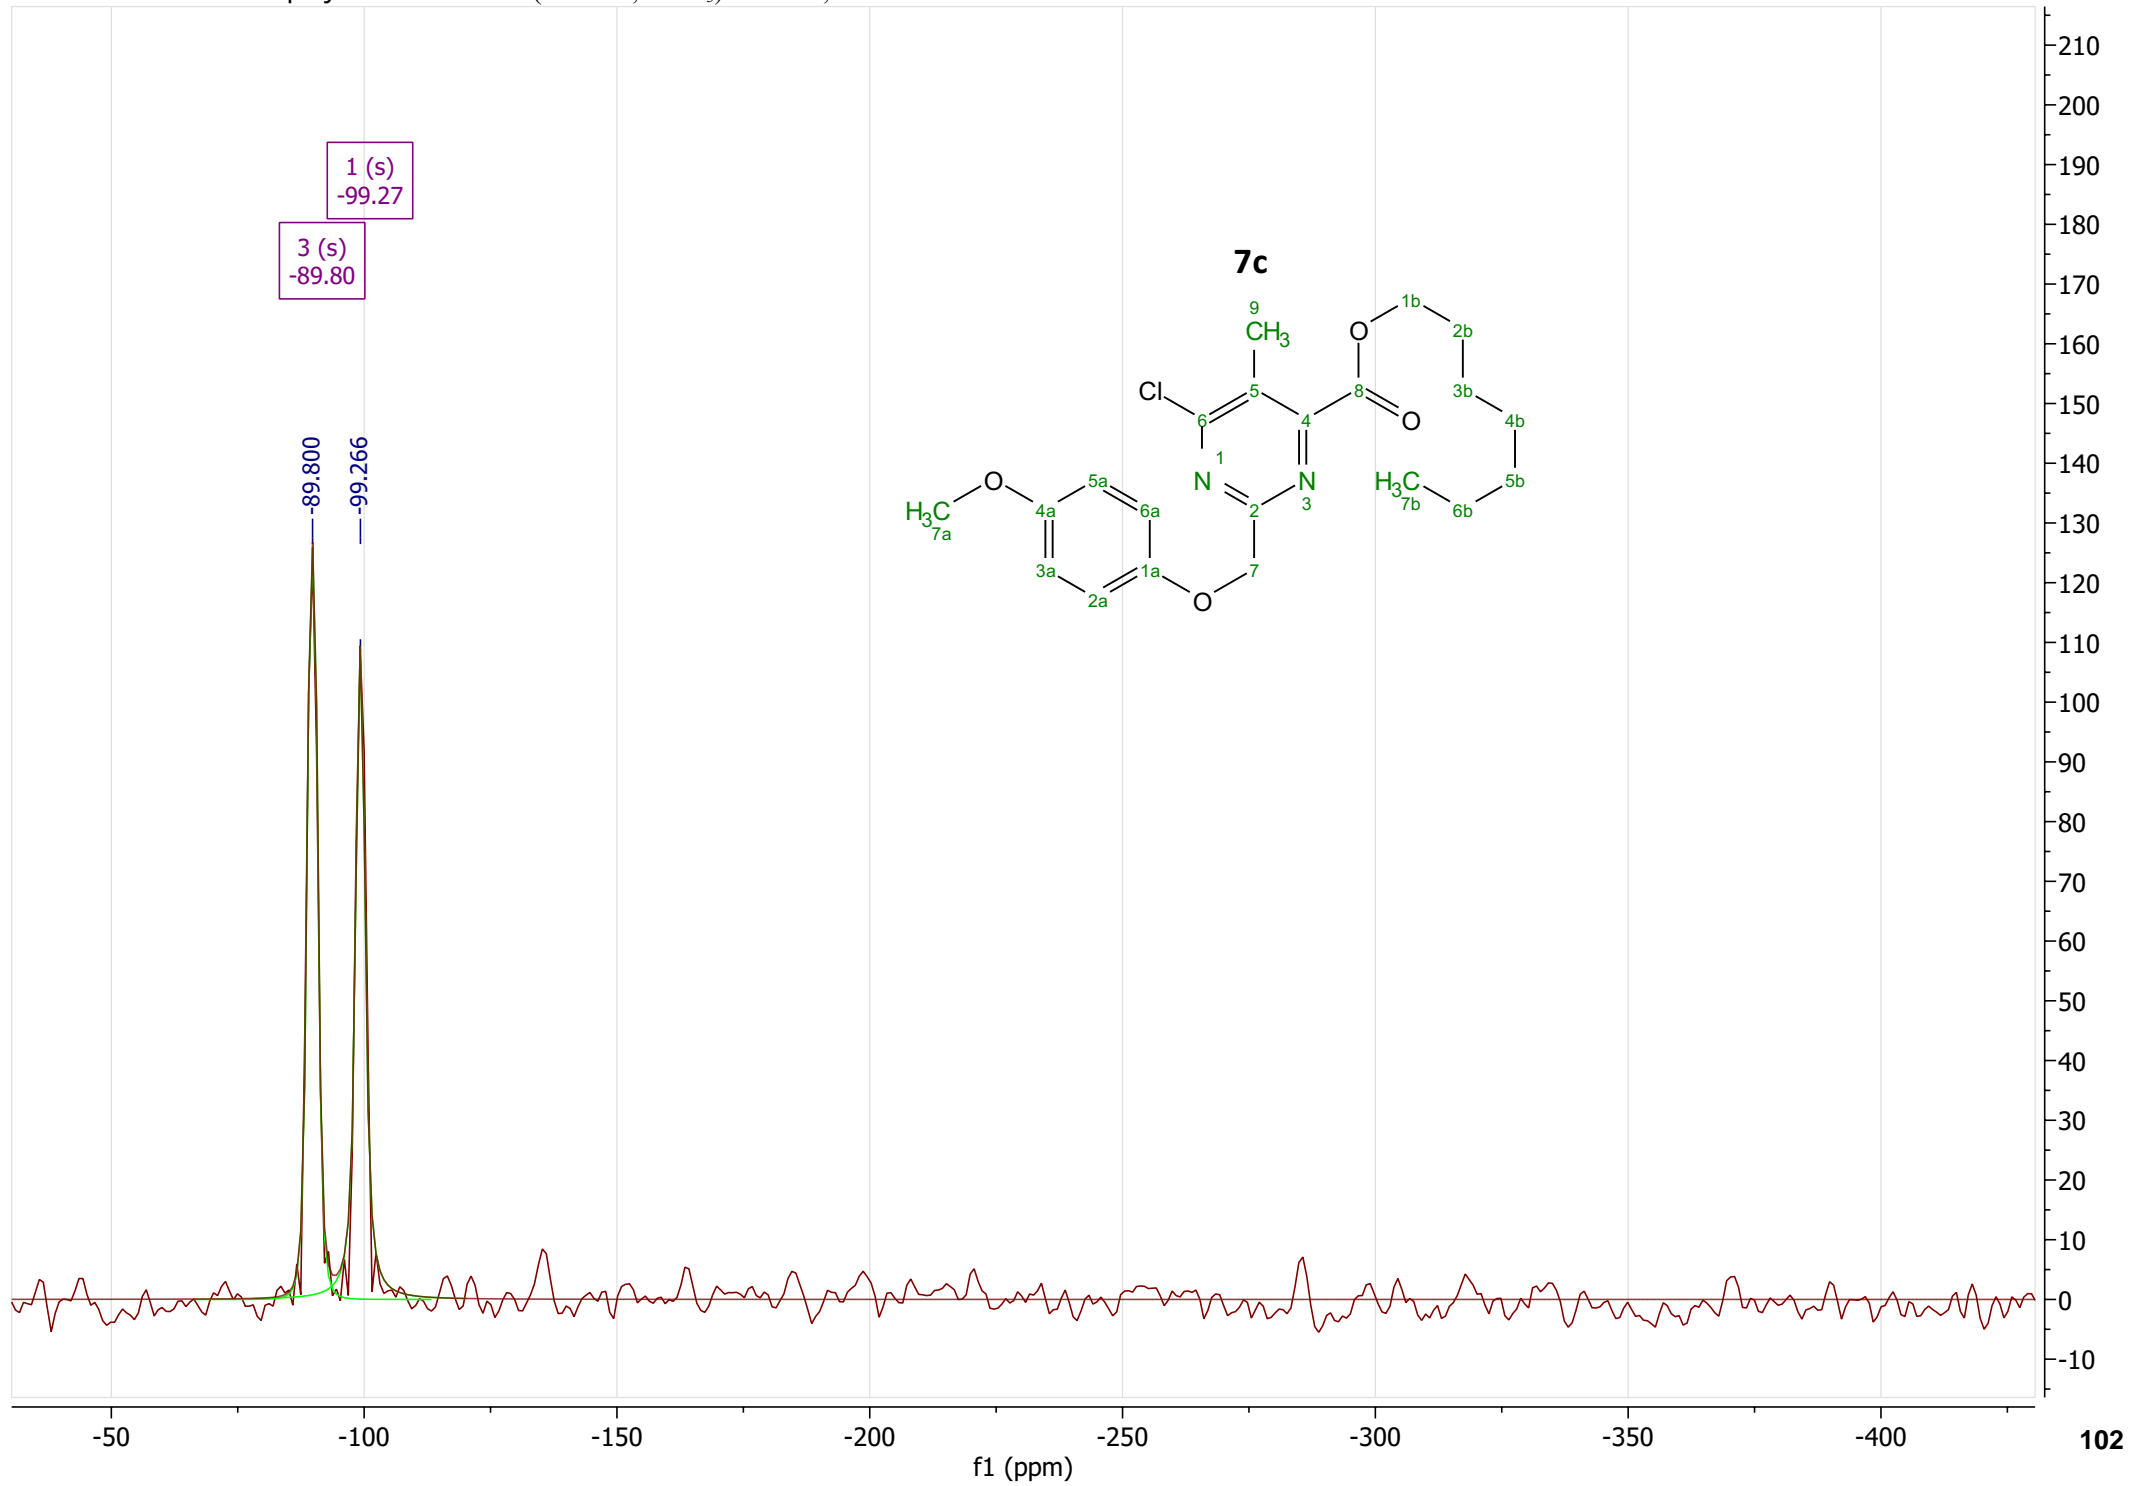

<sup>1</sup>H NMR (400 MHz, CDCl<sub>3</sub>) δ 6.99 – 6.90 (m, 2H), 6.85 – 6.77 (m, 2H), 5.20 (app d, *J* = 0.6 Hz, 2H), 4.40 (t, *J* = 6.8 Hz, 2H), 3.75 (s, 3H), 2.49 (app t, *J* = 0.6 Hz, 3H), 1.83 – 1.71 (m, 2H), 1.47 – 1.37 (m, 2H), 1.36 – 1.22 (m, 8H), 0.88 (app t, *J* = 7.0 Hz, 3H).

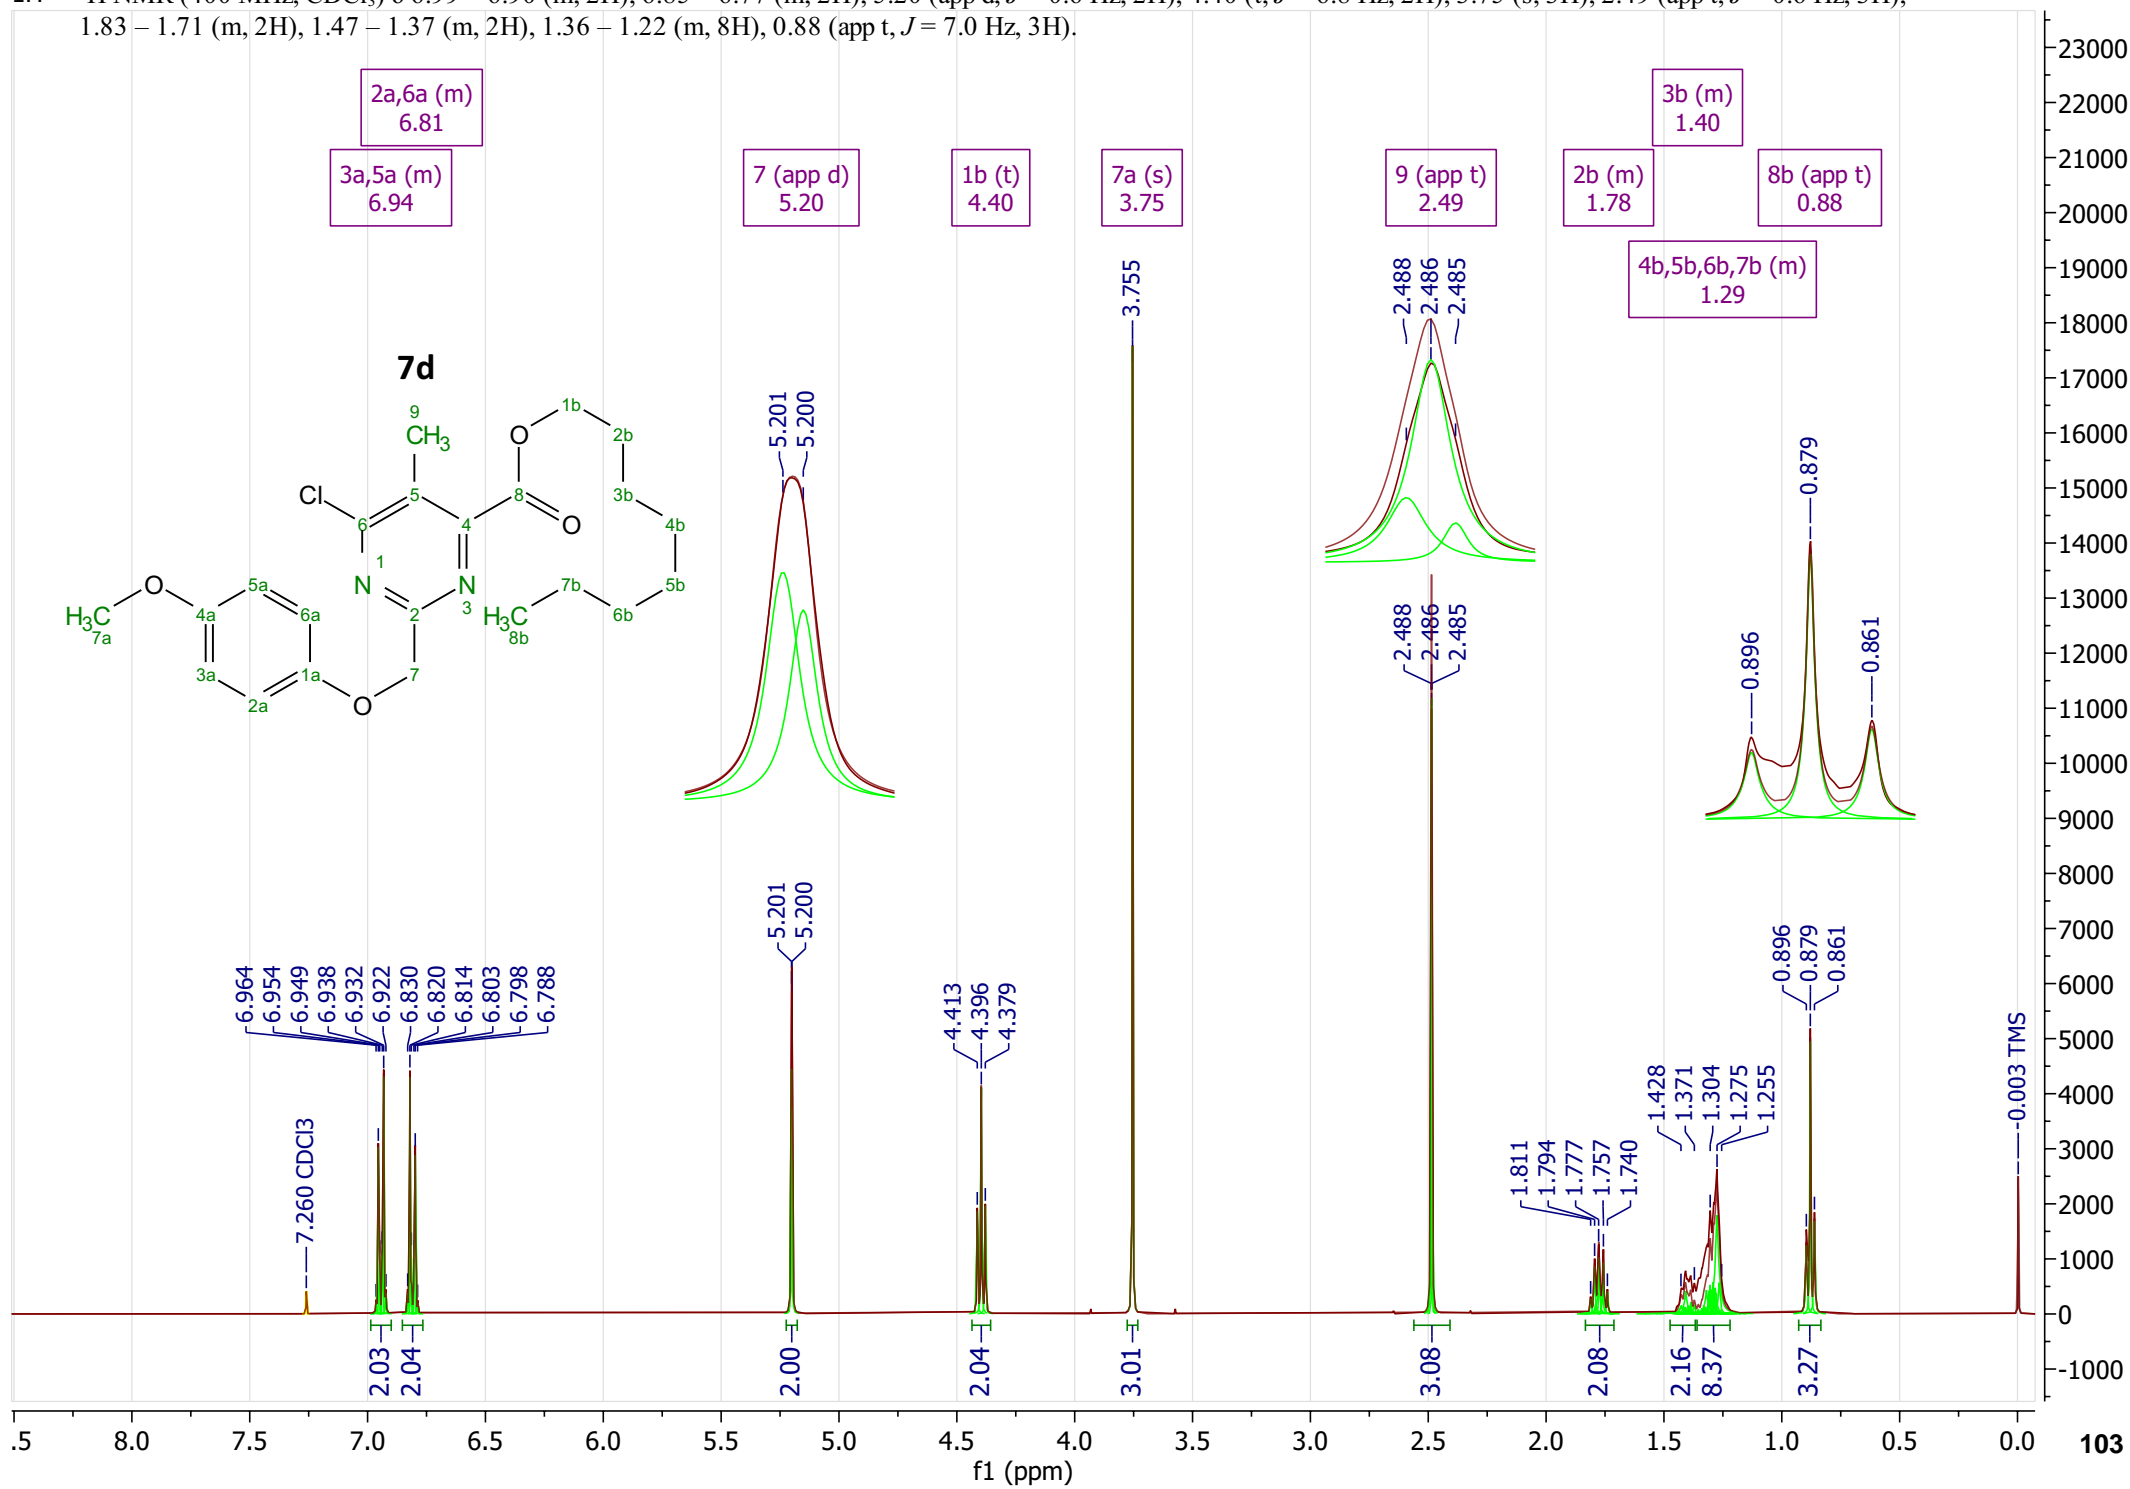

<sup>13</sup>C NMR (101 MHz, CDCl<sub>3</sub>) δ 164.8, 164.13, 164.06, 157.8, 154.5, 152.6, 127.5, 116.3 (sym, 2C), 114.7 (sym, 2C), 71.0, 67.0, 55.8, 31.9, 29.3 (2C), 28.6, 26.0, 22.8, 15.3, 14.2.

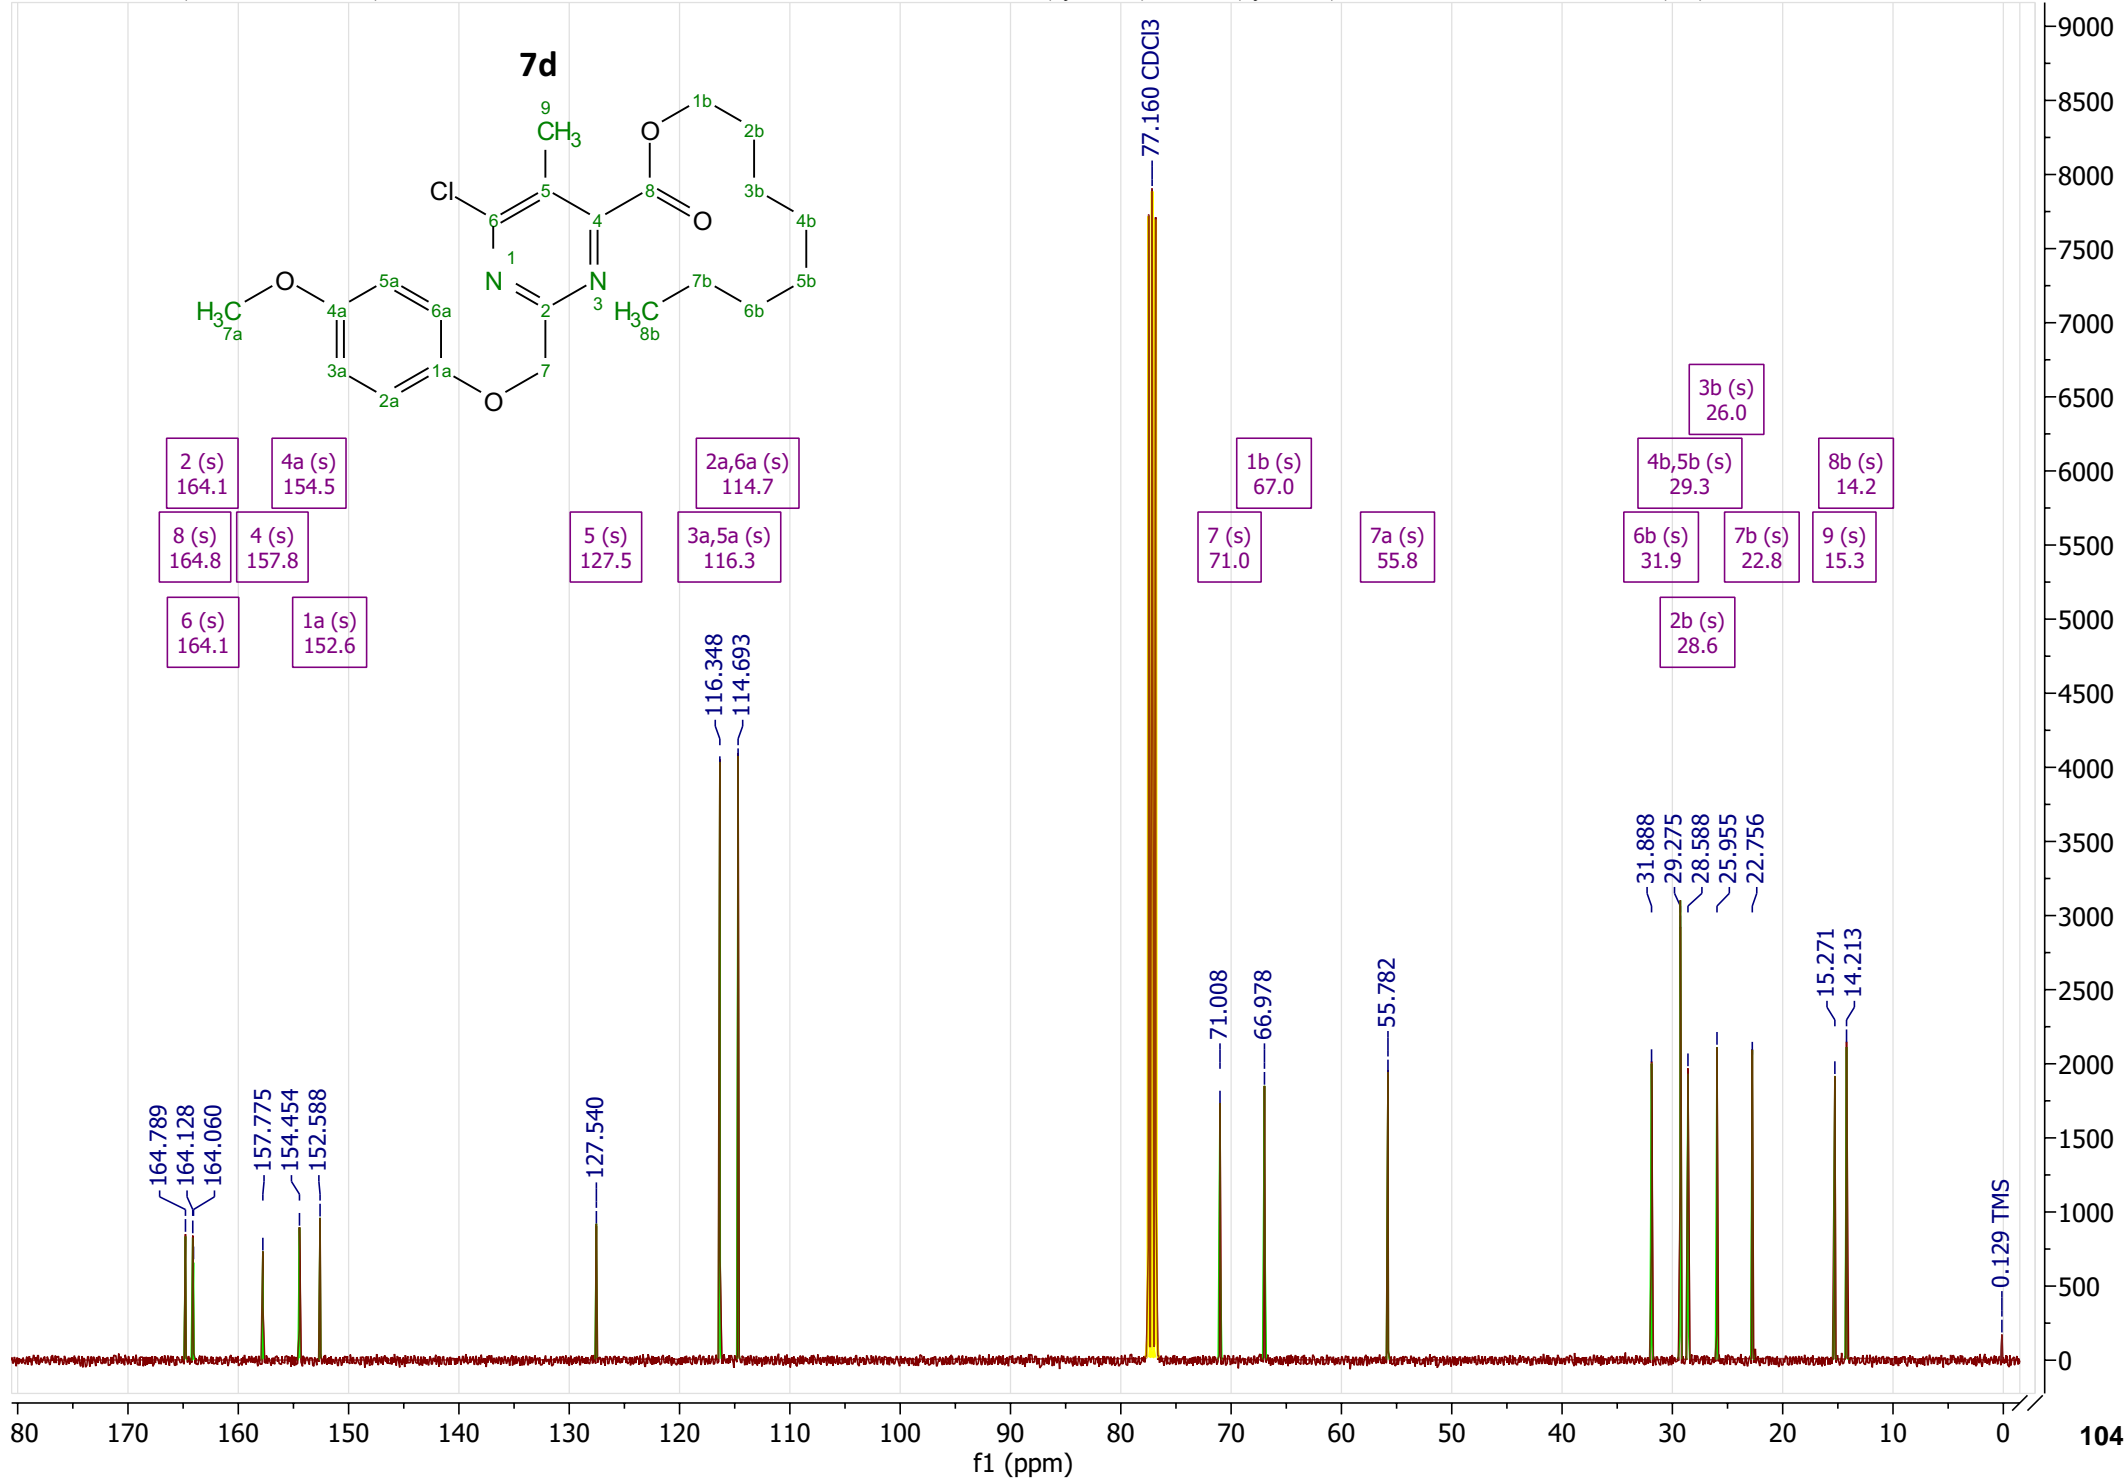



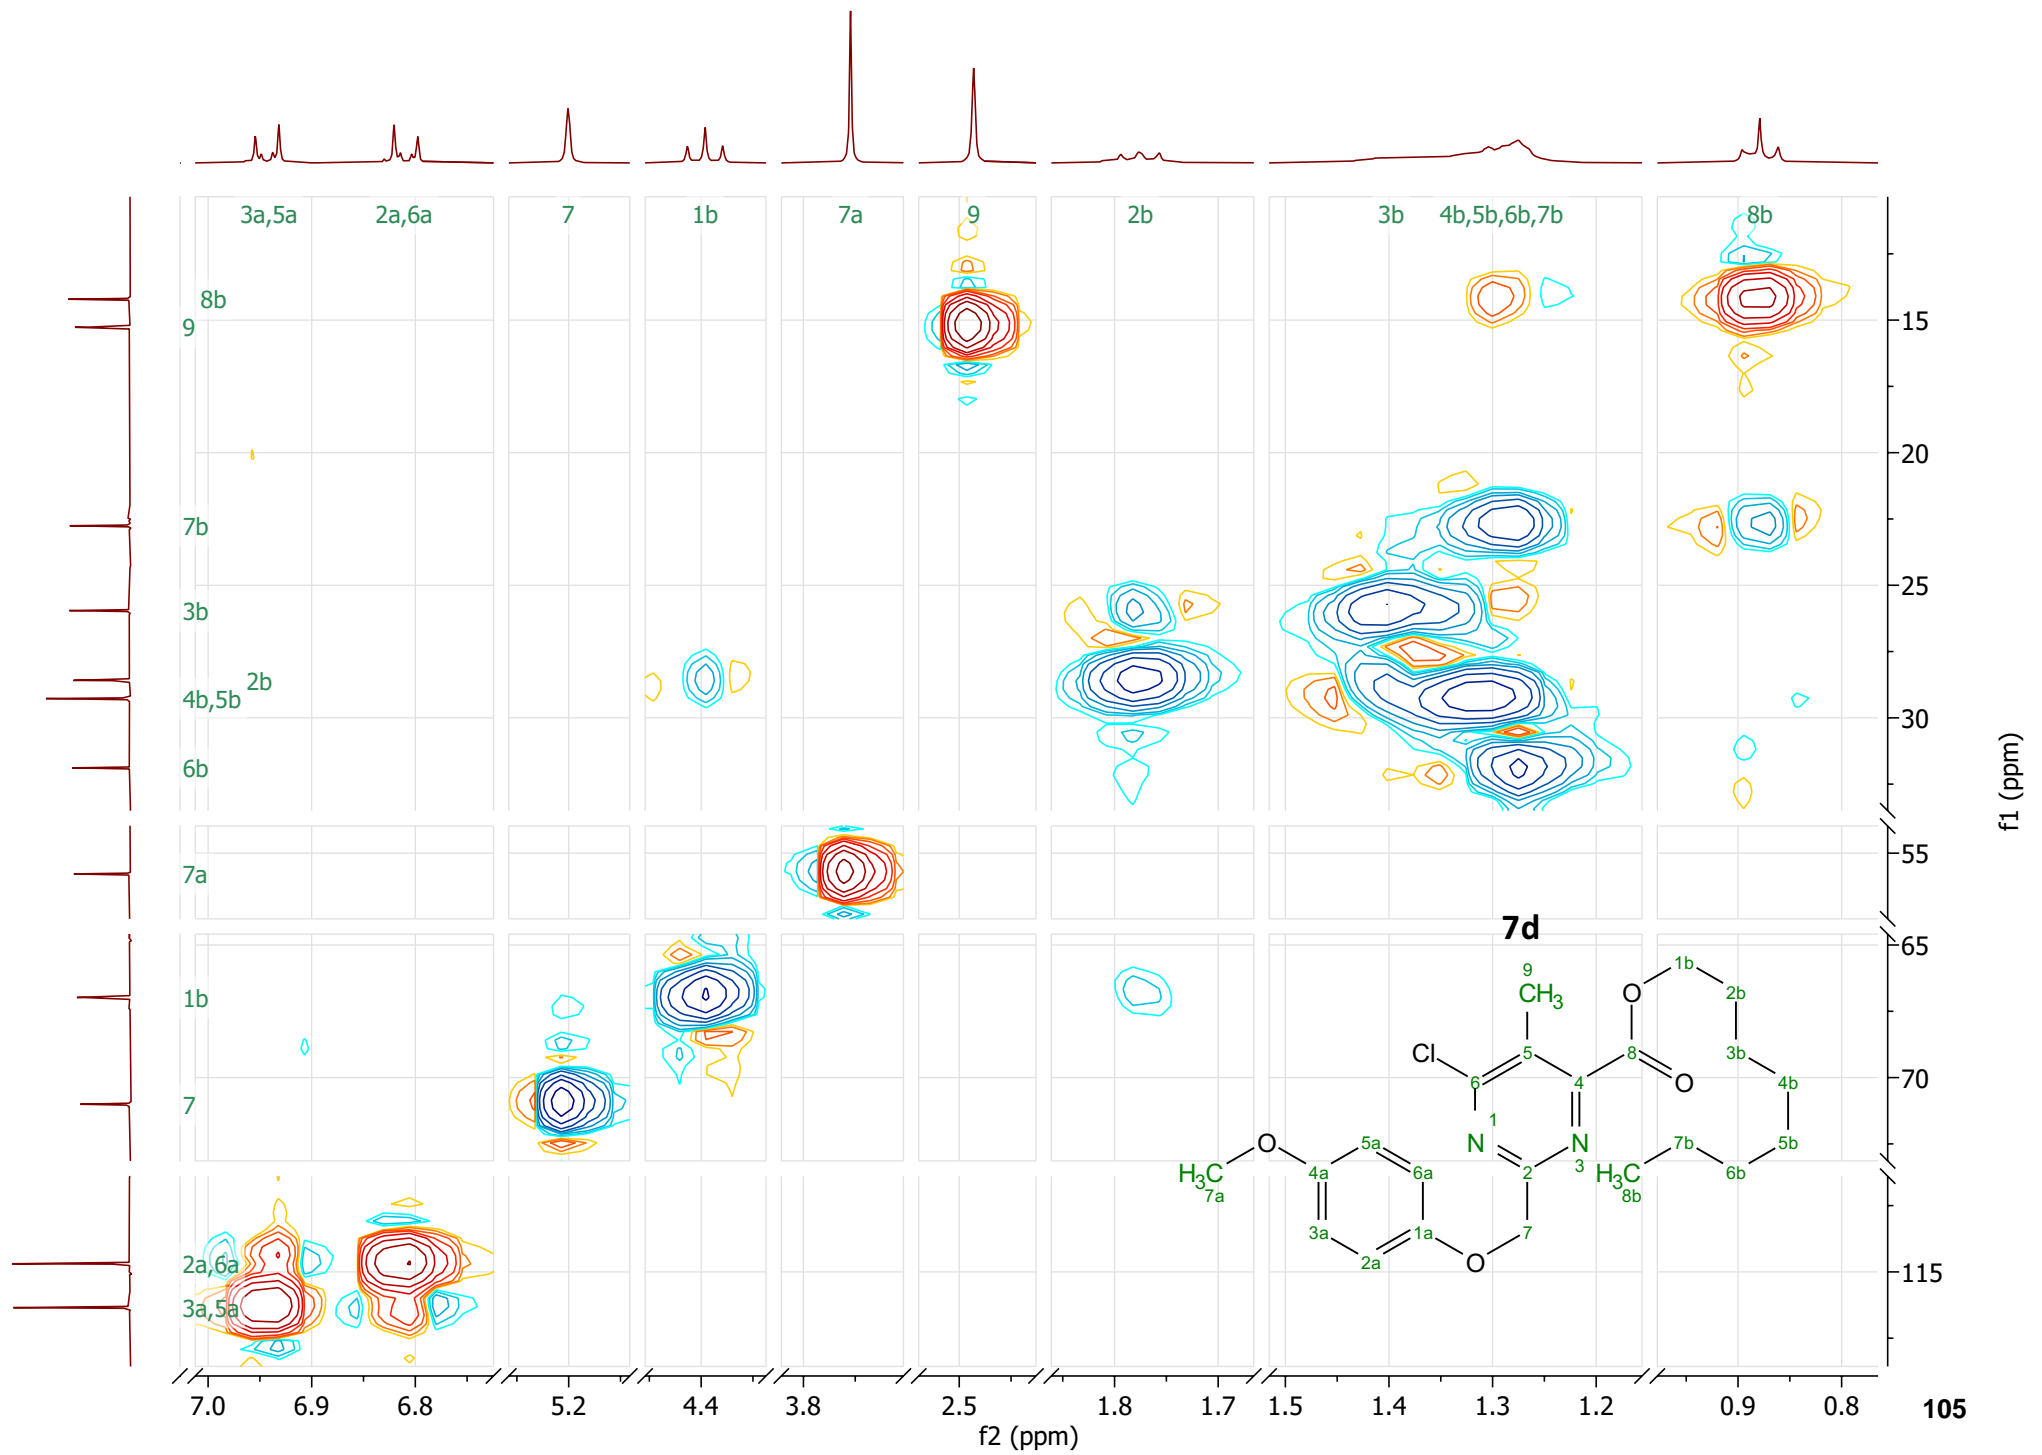

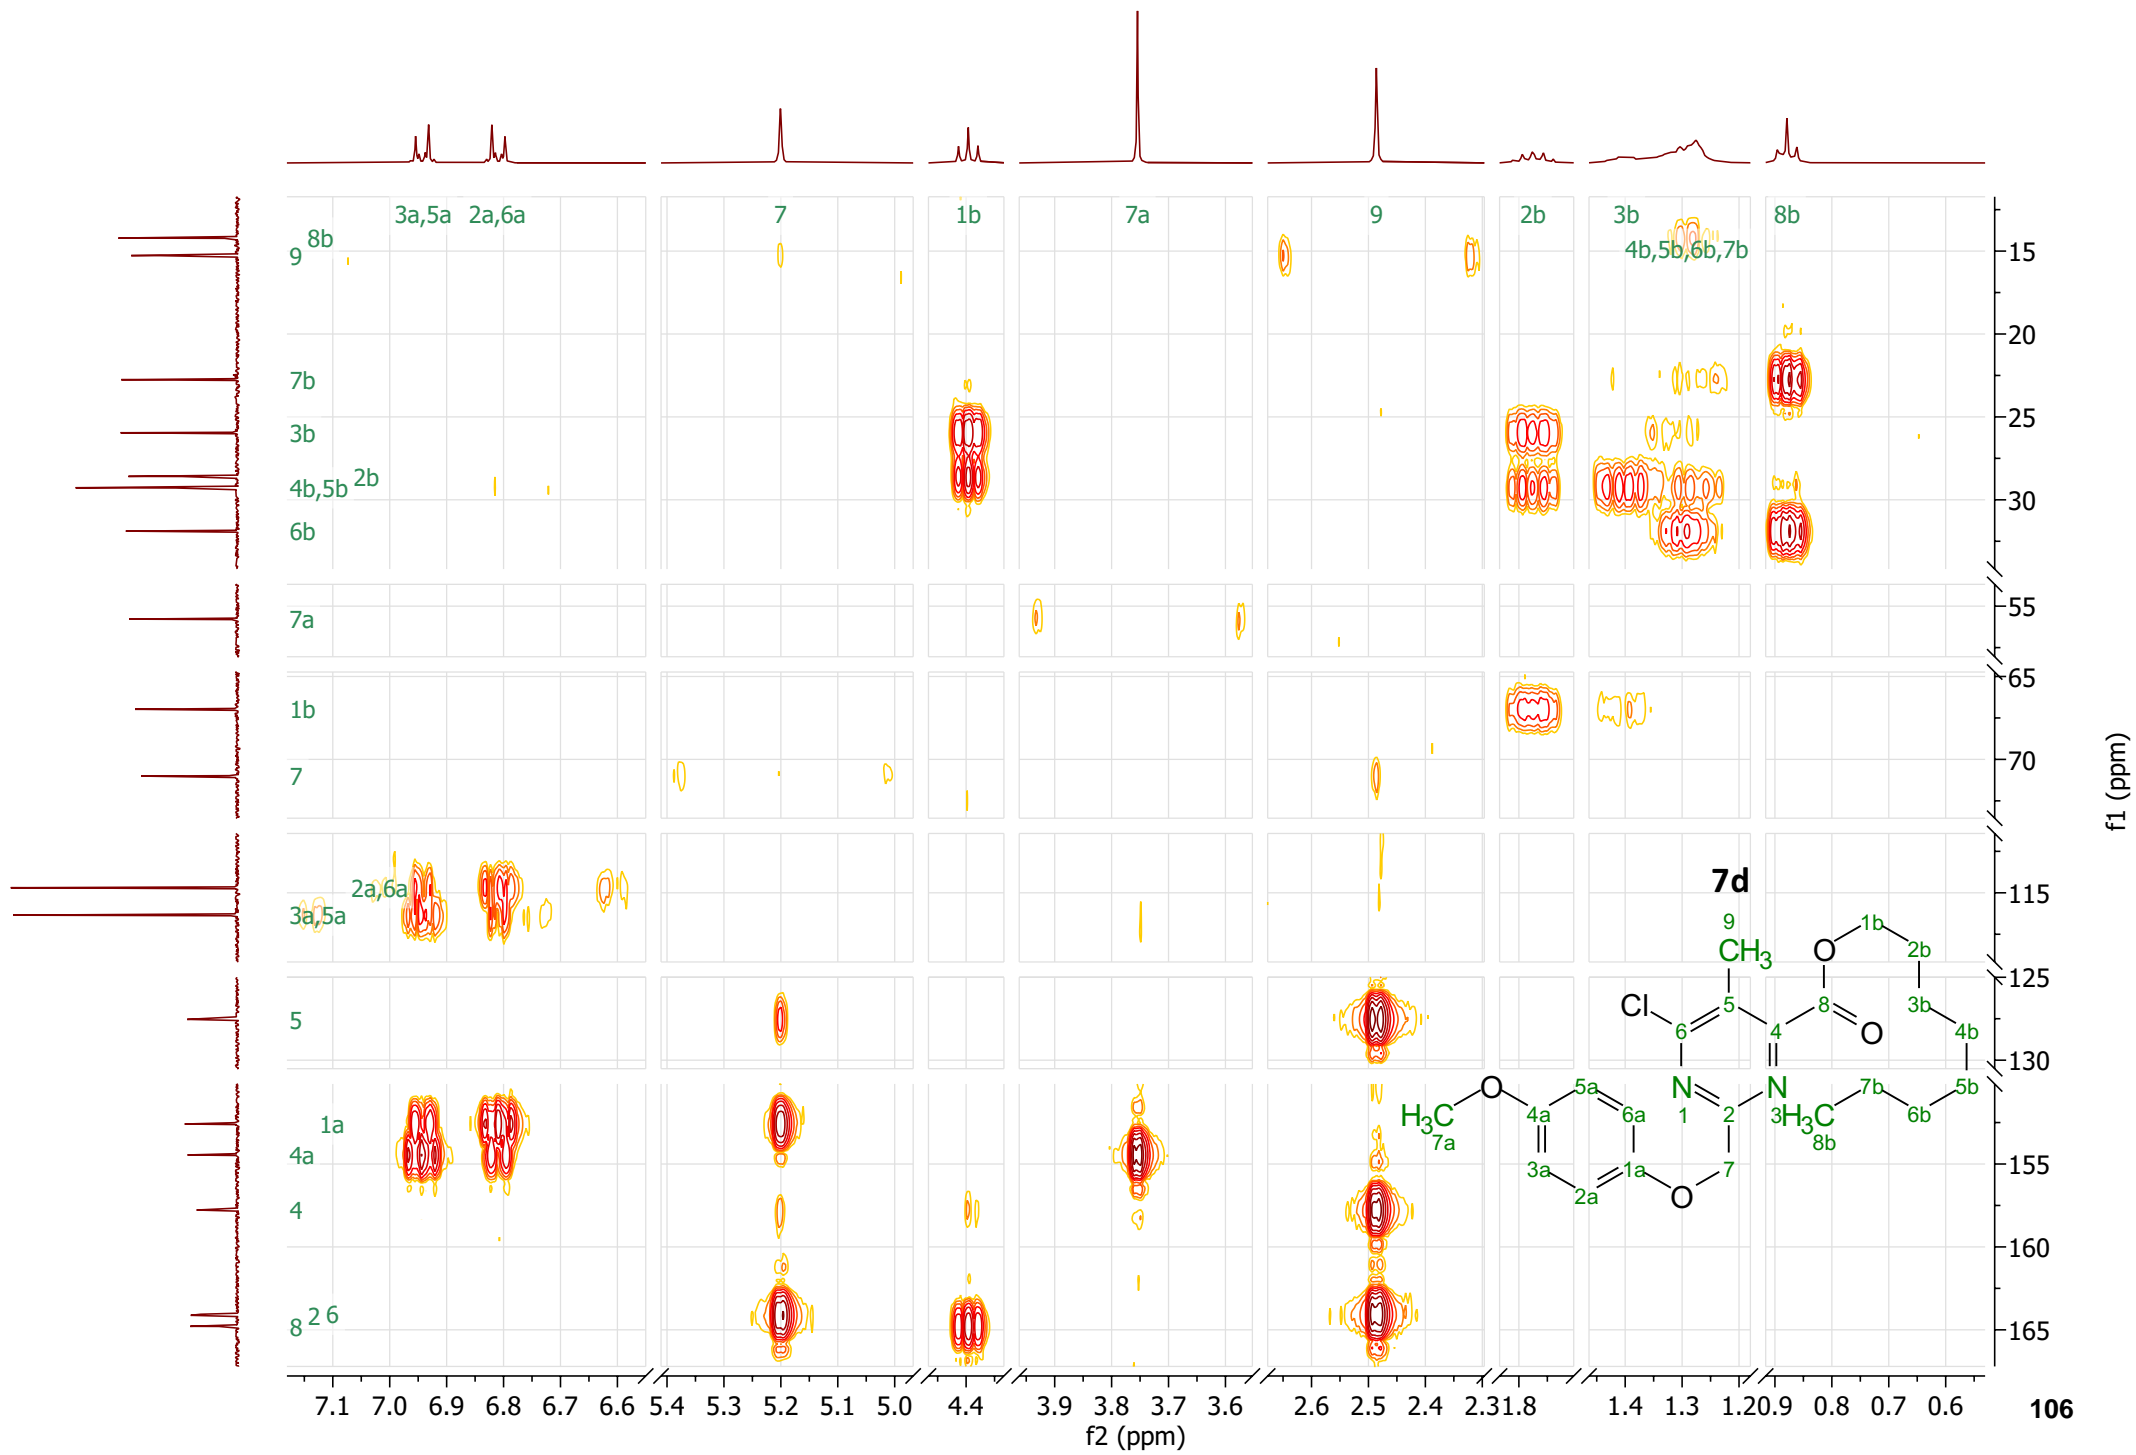

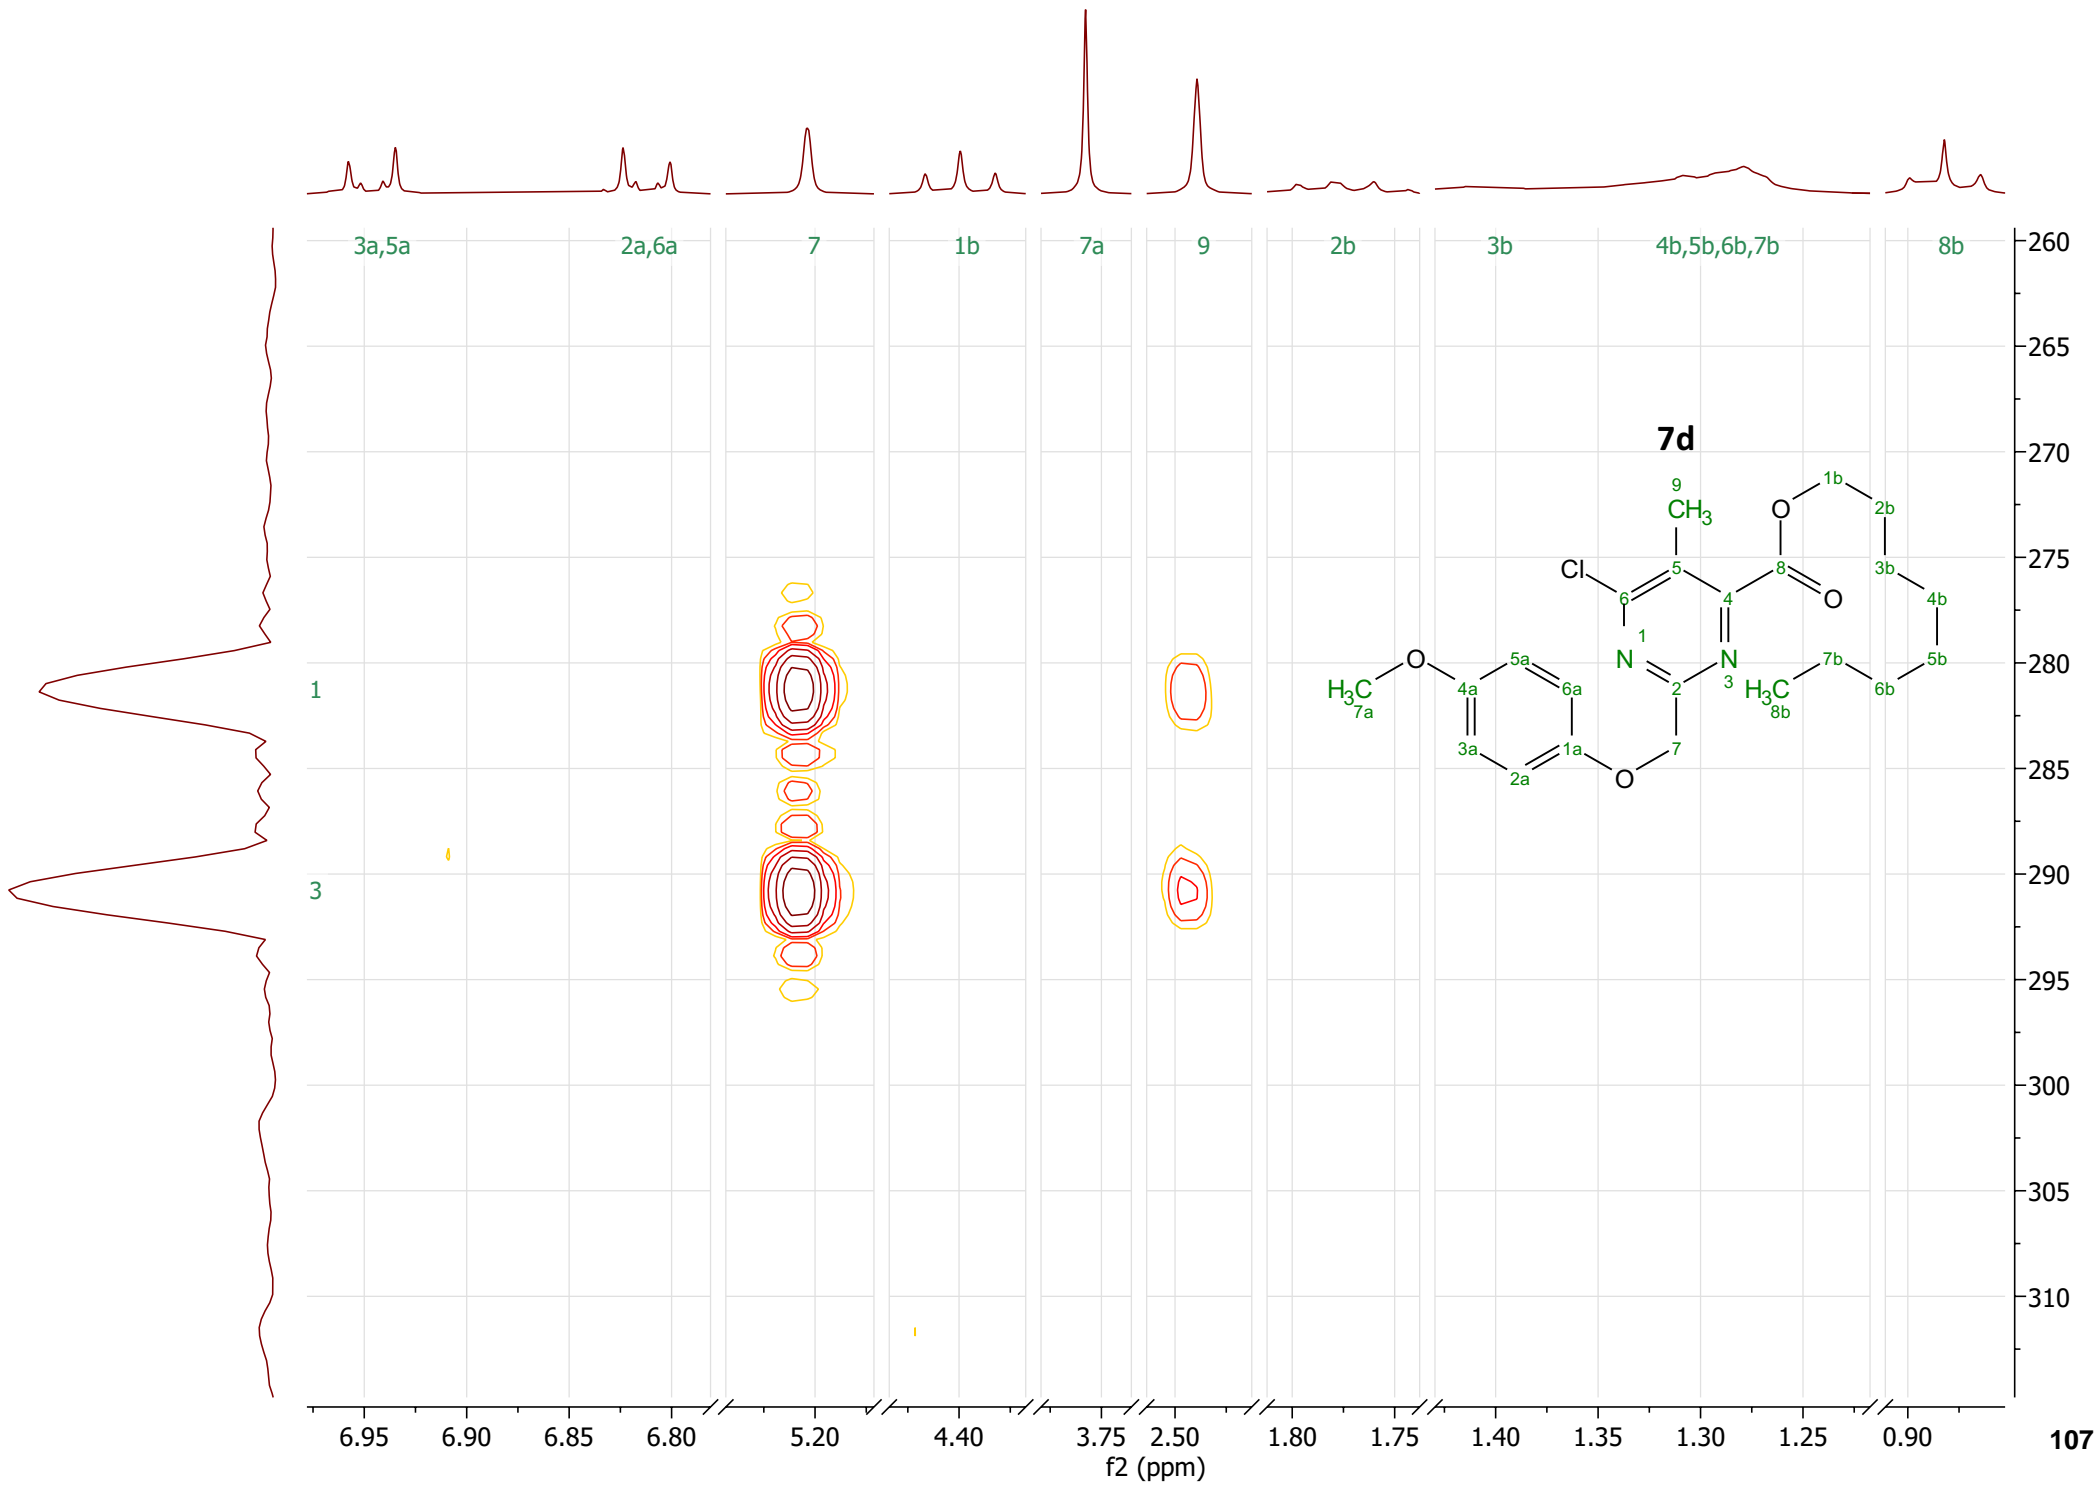

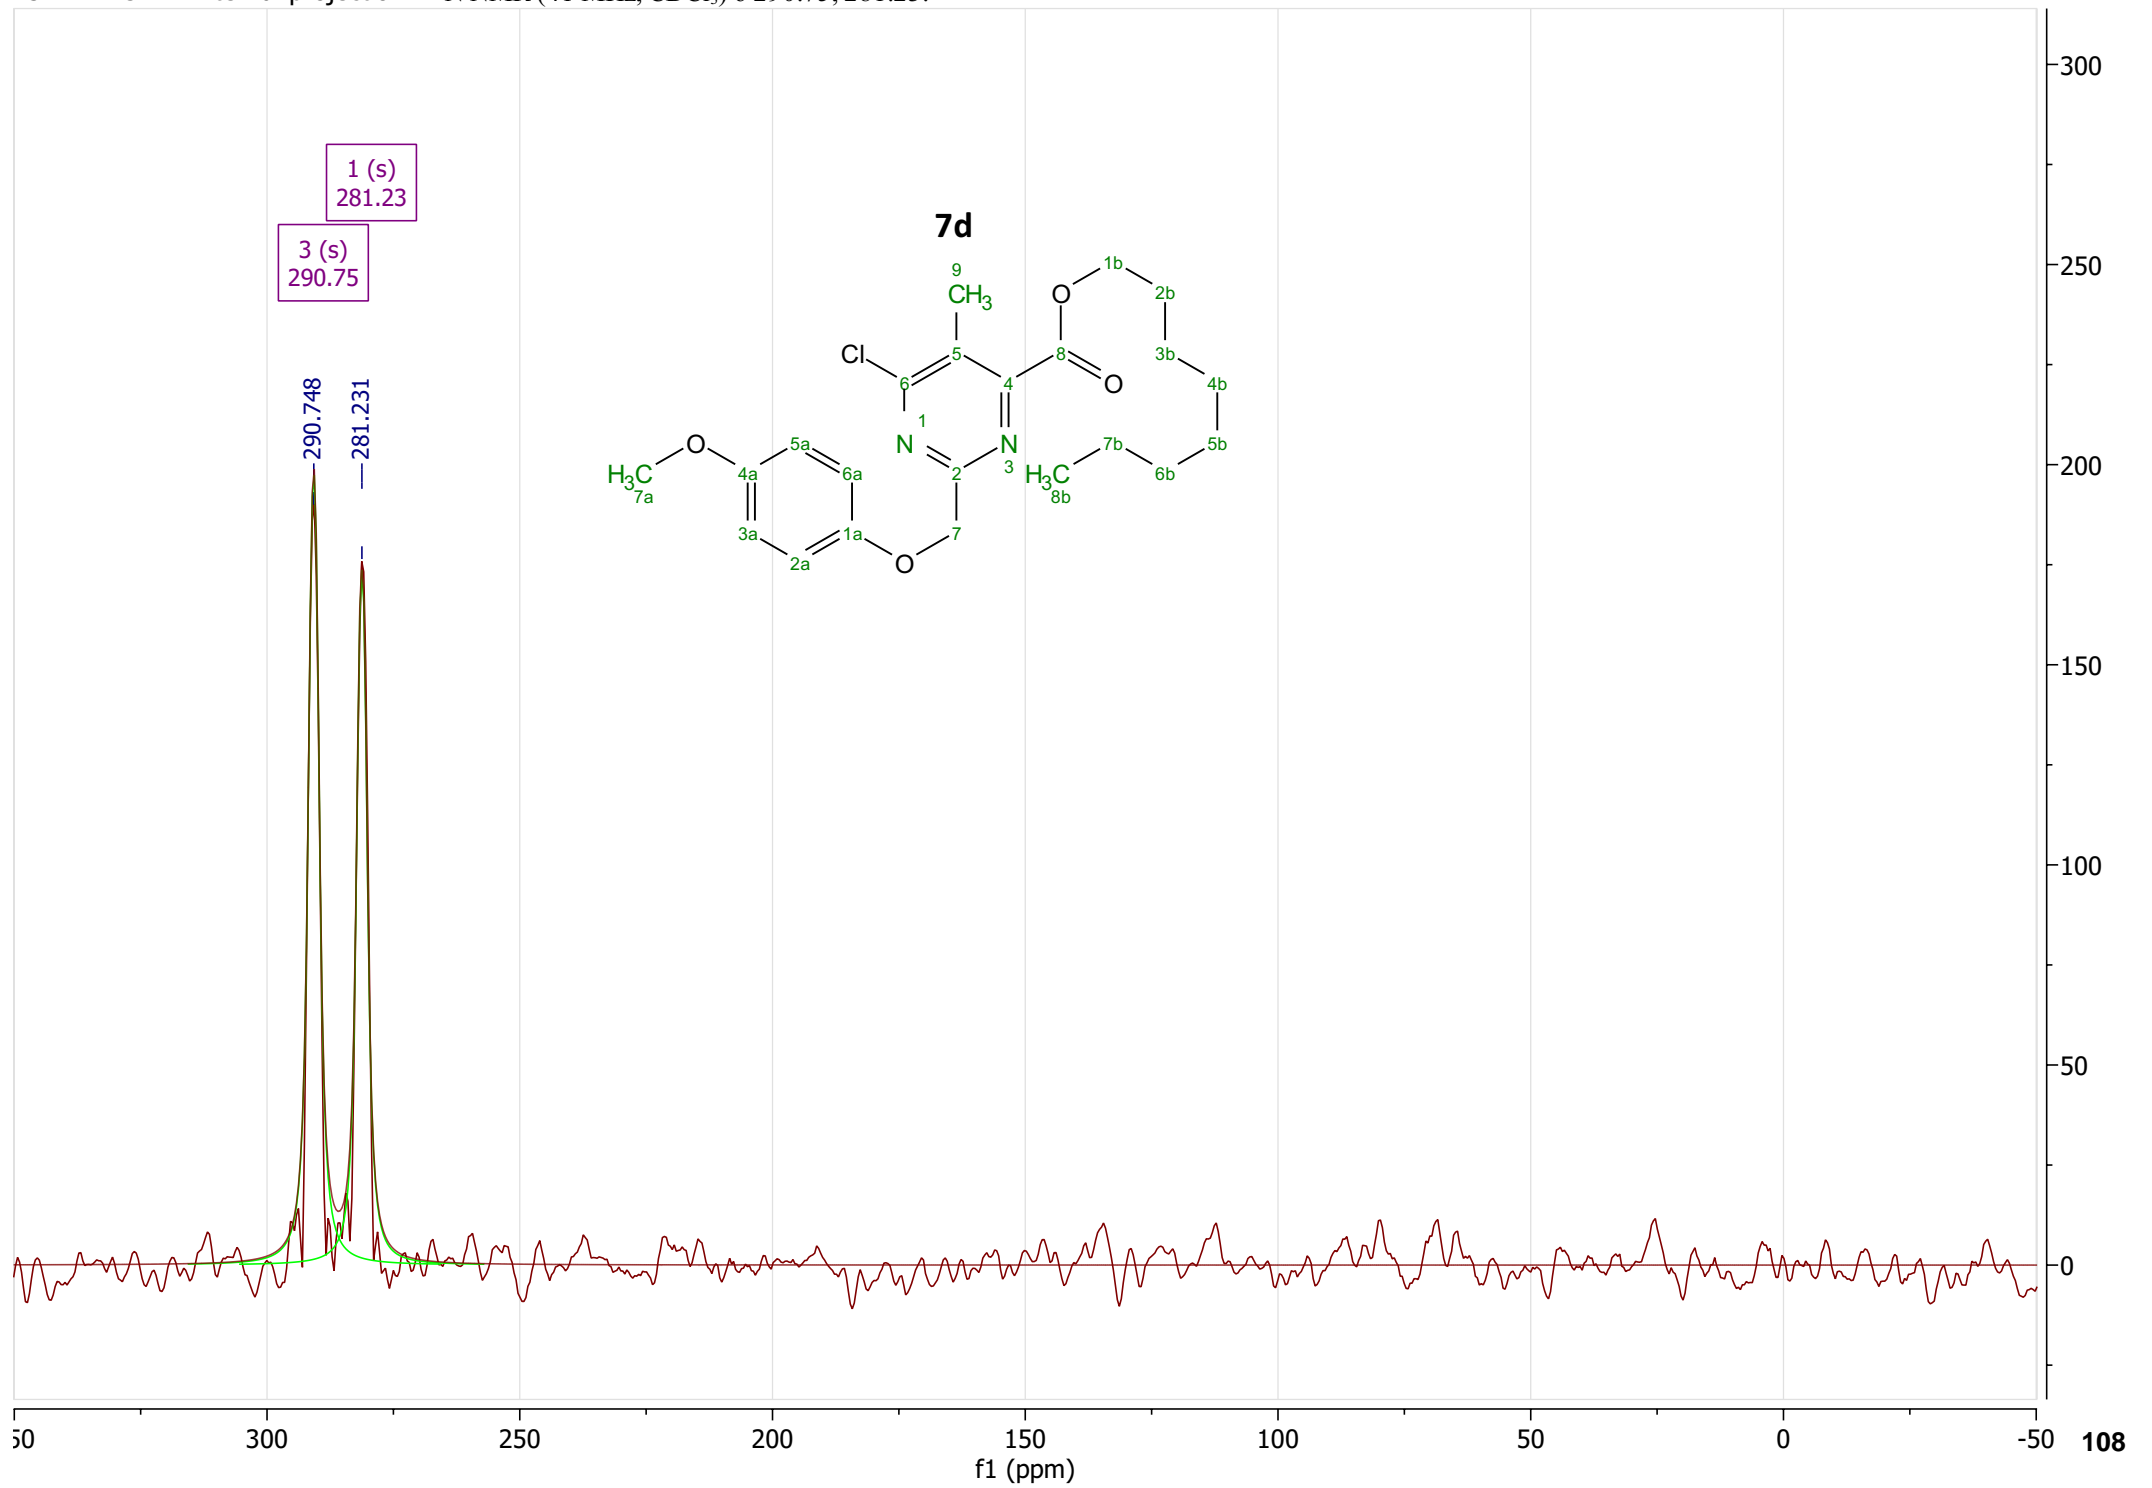

$^1\text{H}$  NMR (400 MHz,  $\text{CDCl}_3$ )  $\delta$  6.99 – 6.90 (m, 2H), 6.85 – 6.77 (m, 2H), 5.20 (s, 2H), 4.40 (t,  $J = 6.8$  Hz, 2H), 3.76 (s, 3H), 2.49 (s, 3H), 1.83 – 1.72 (m, 2H), 1.46 – 1.36 (m, 2H), 1.35 – 1.24 (m, 10H), 0.88 (app t,  $J = 6.9$  Hz, 3H).

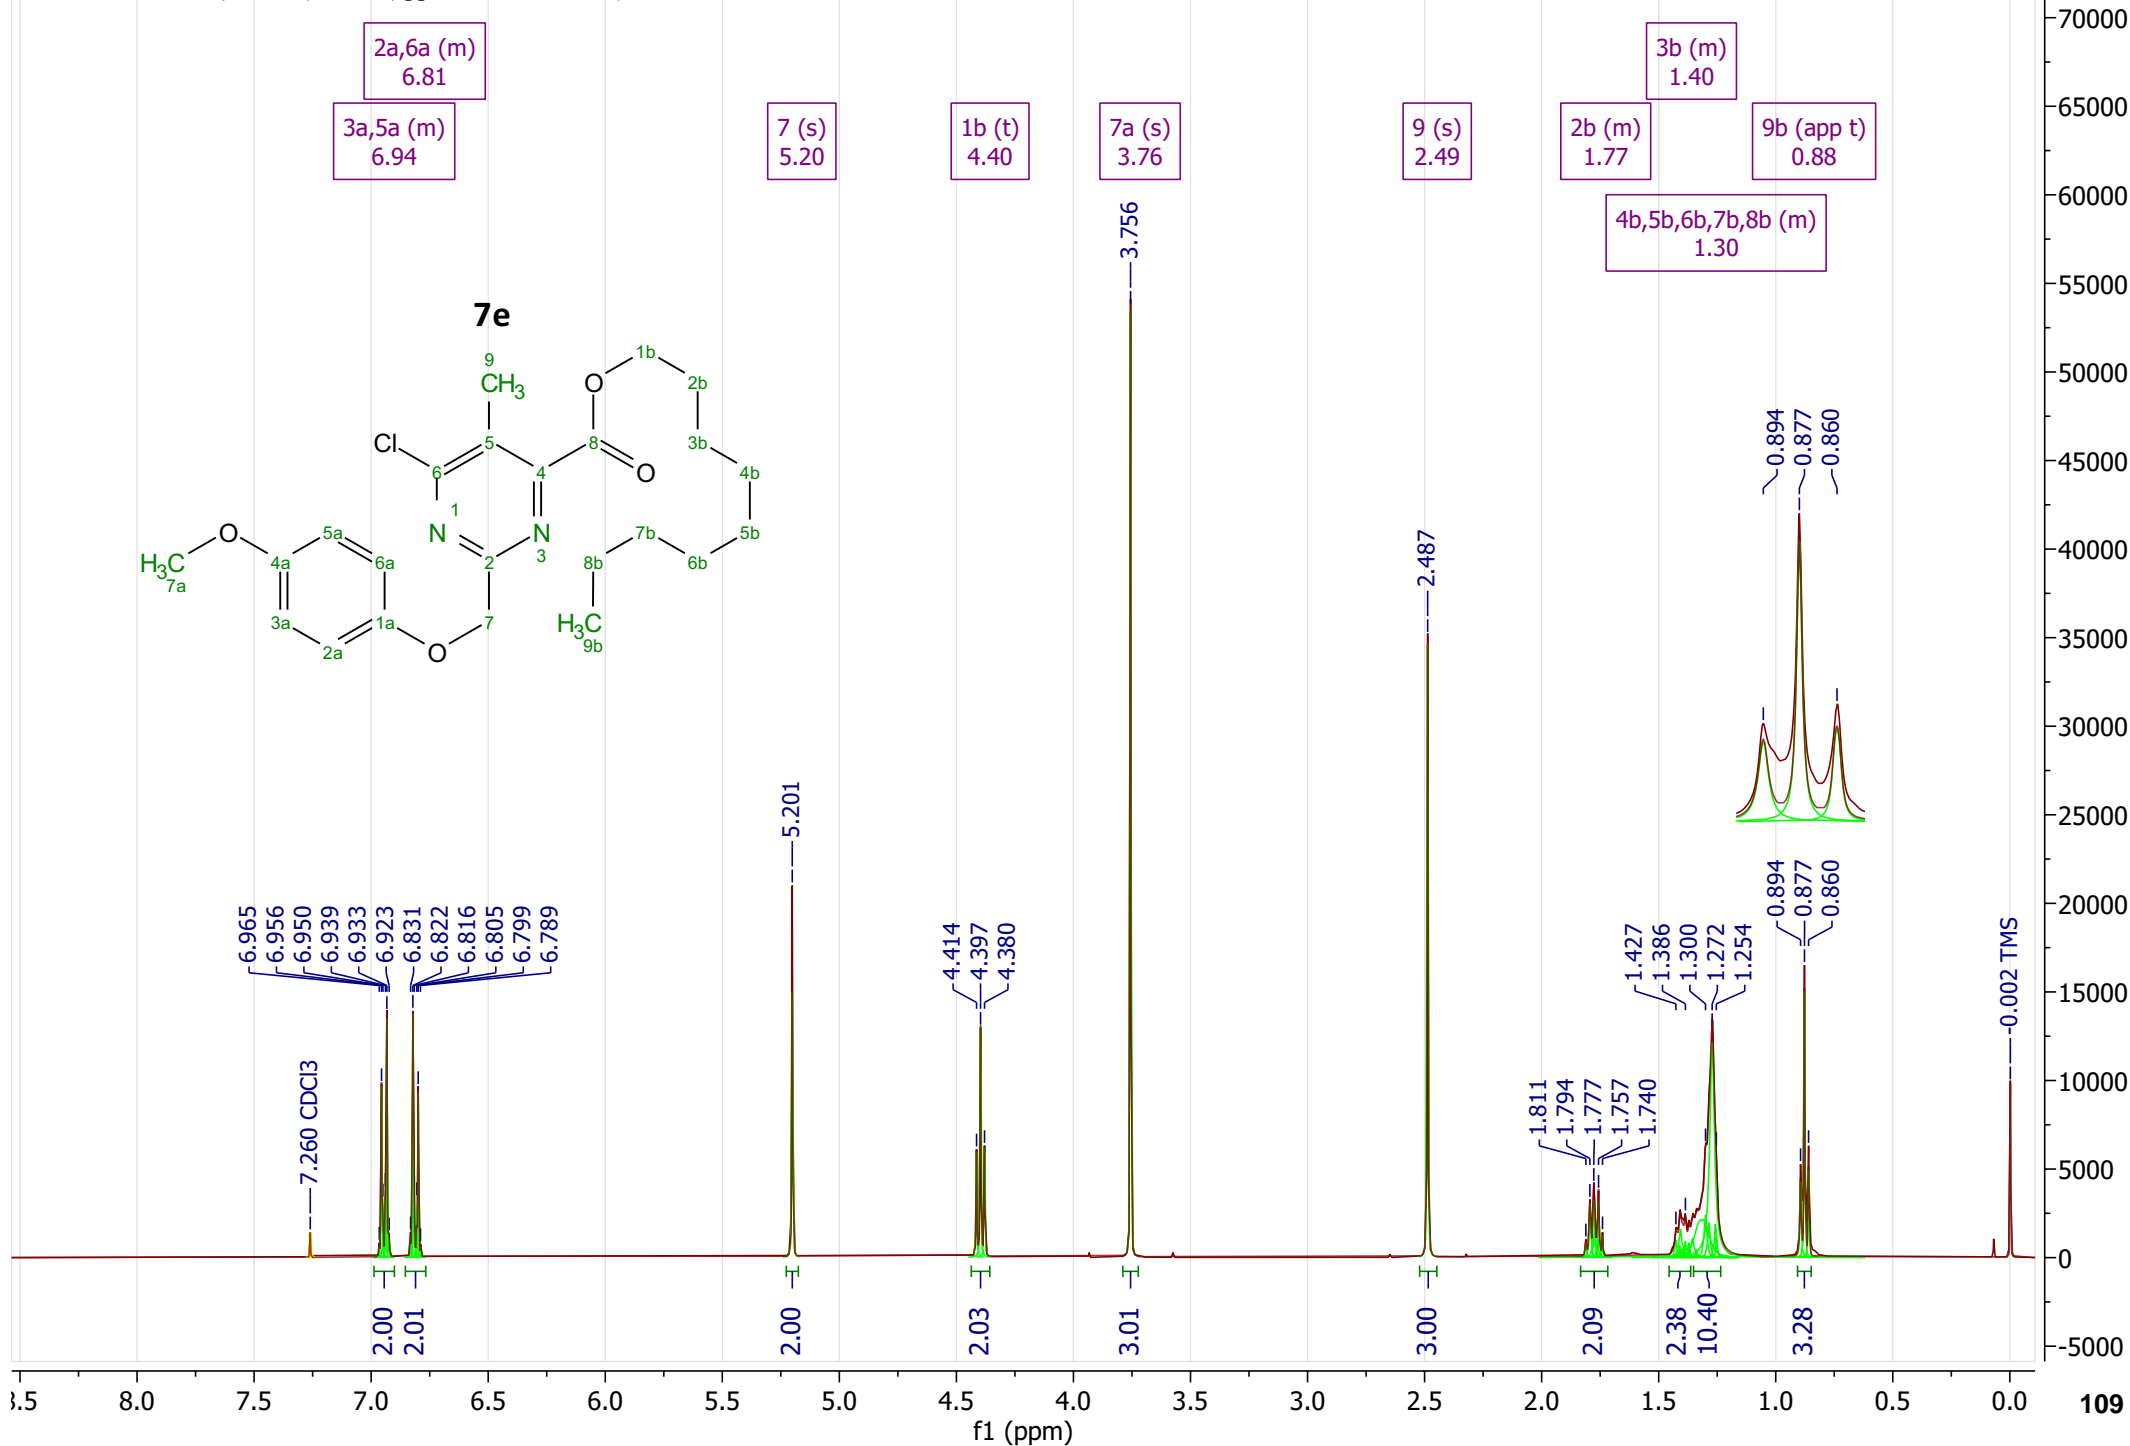

$^{13}\text{C}$  NMR (101 MHz,  $\text{CDCl}_3$ )  $\delta$  164.8, 164.1, 164.1, 157.8, 154.5, 152.6, 127.5, 116.4 (sym, 2C), 114.7 (sym, 2C), 71.0, 67.0, 55.8, 32.0, 29.6, 29.4, 29.3, 28.6, 26.0, 22.8, 15.3, 14.2.

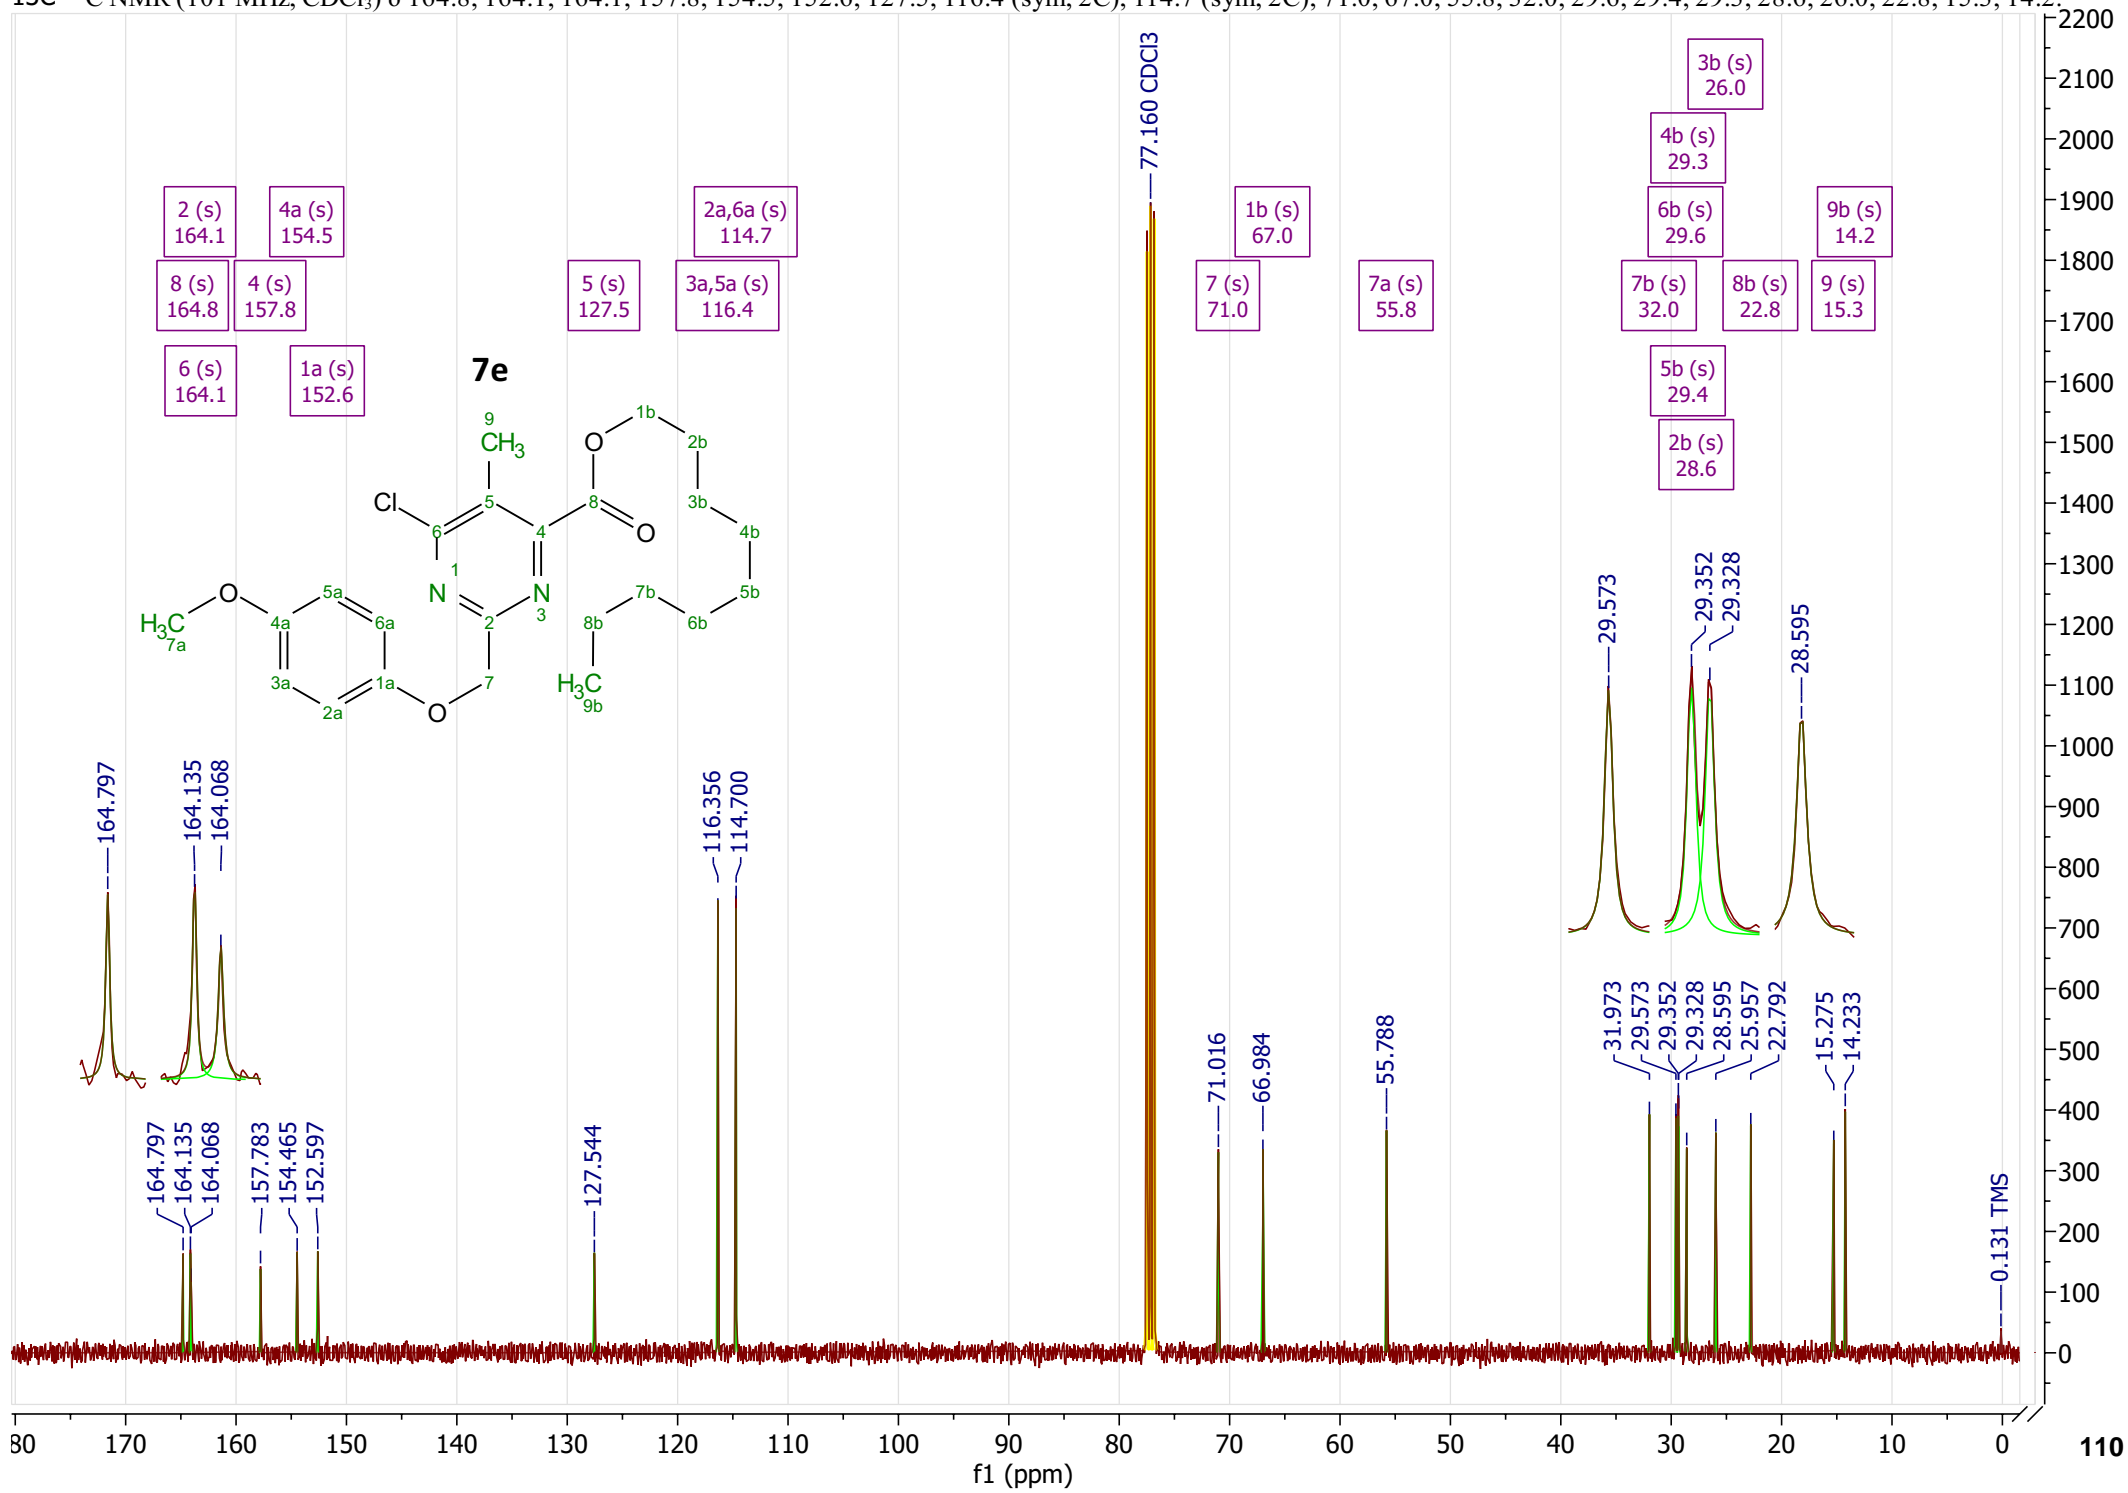

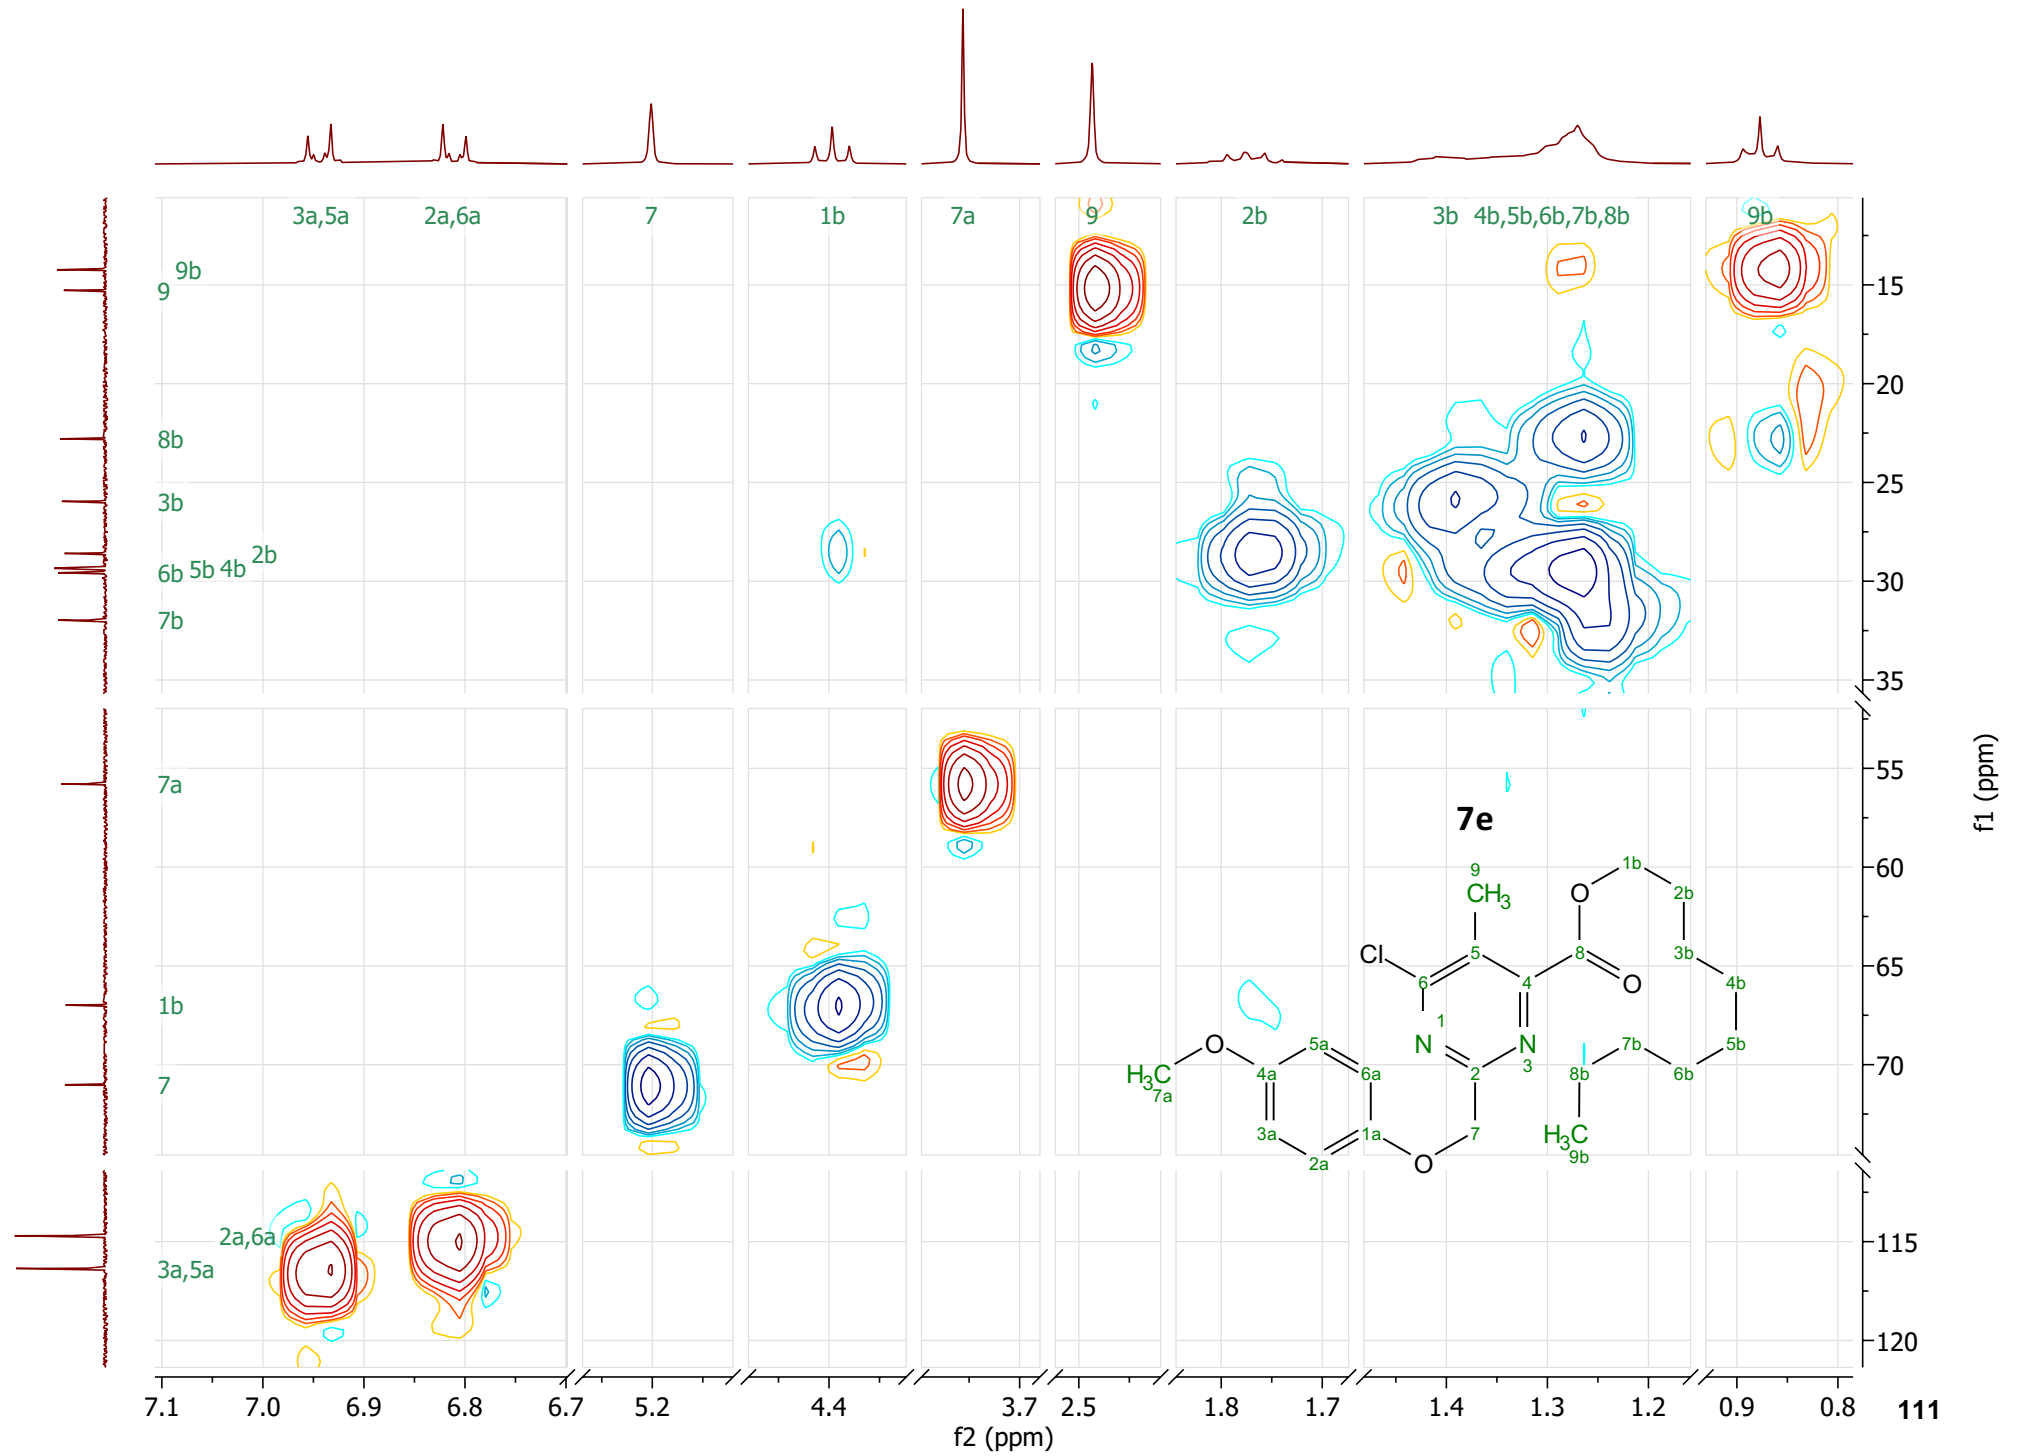

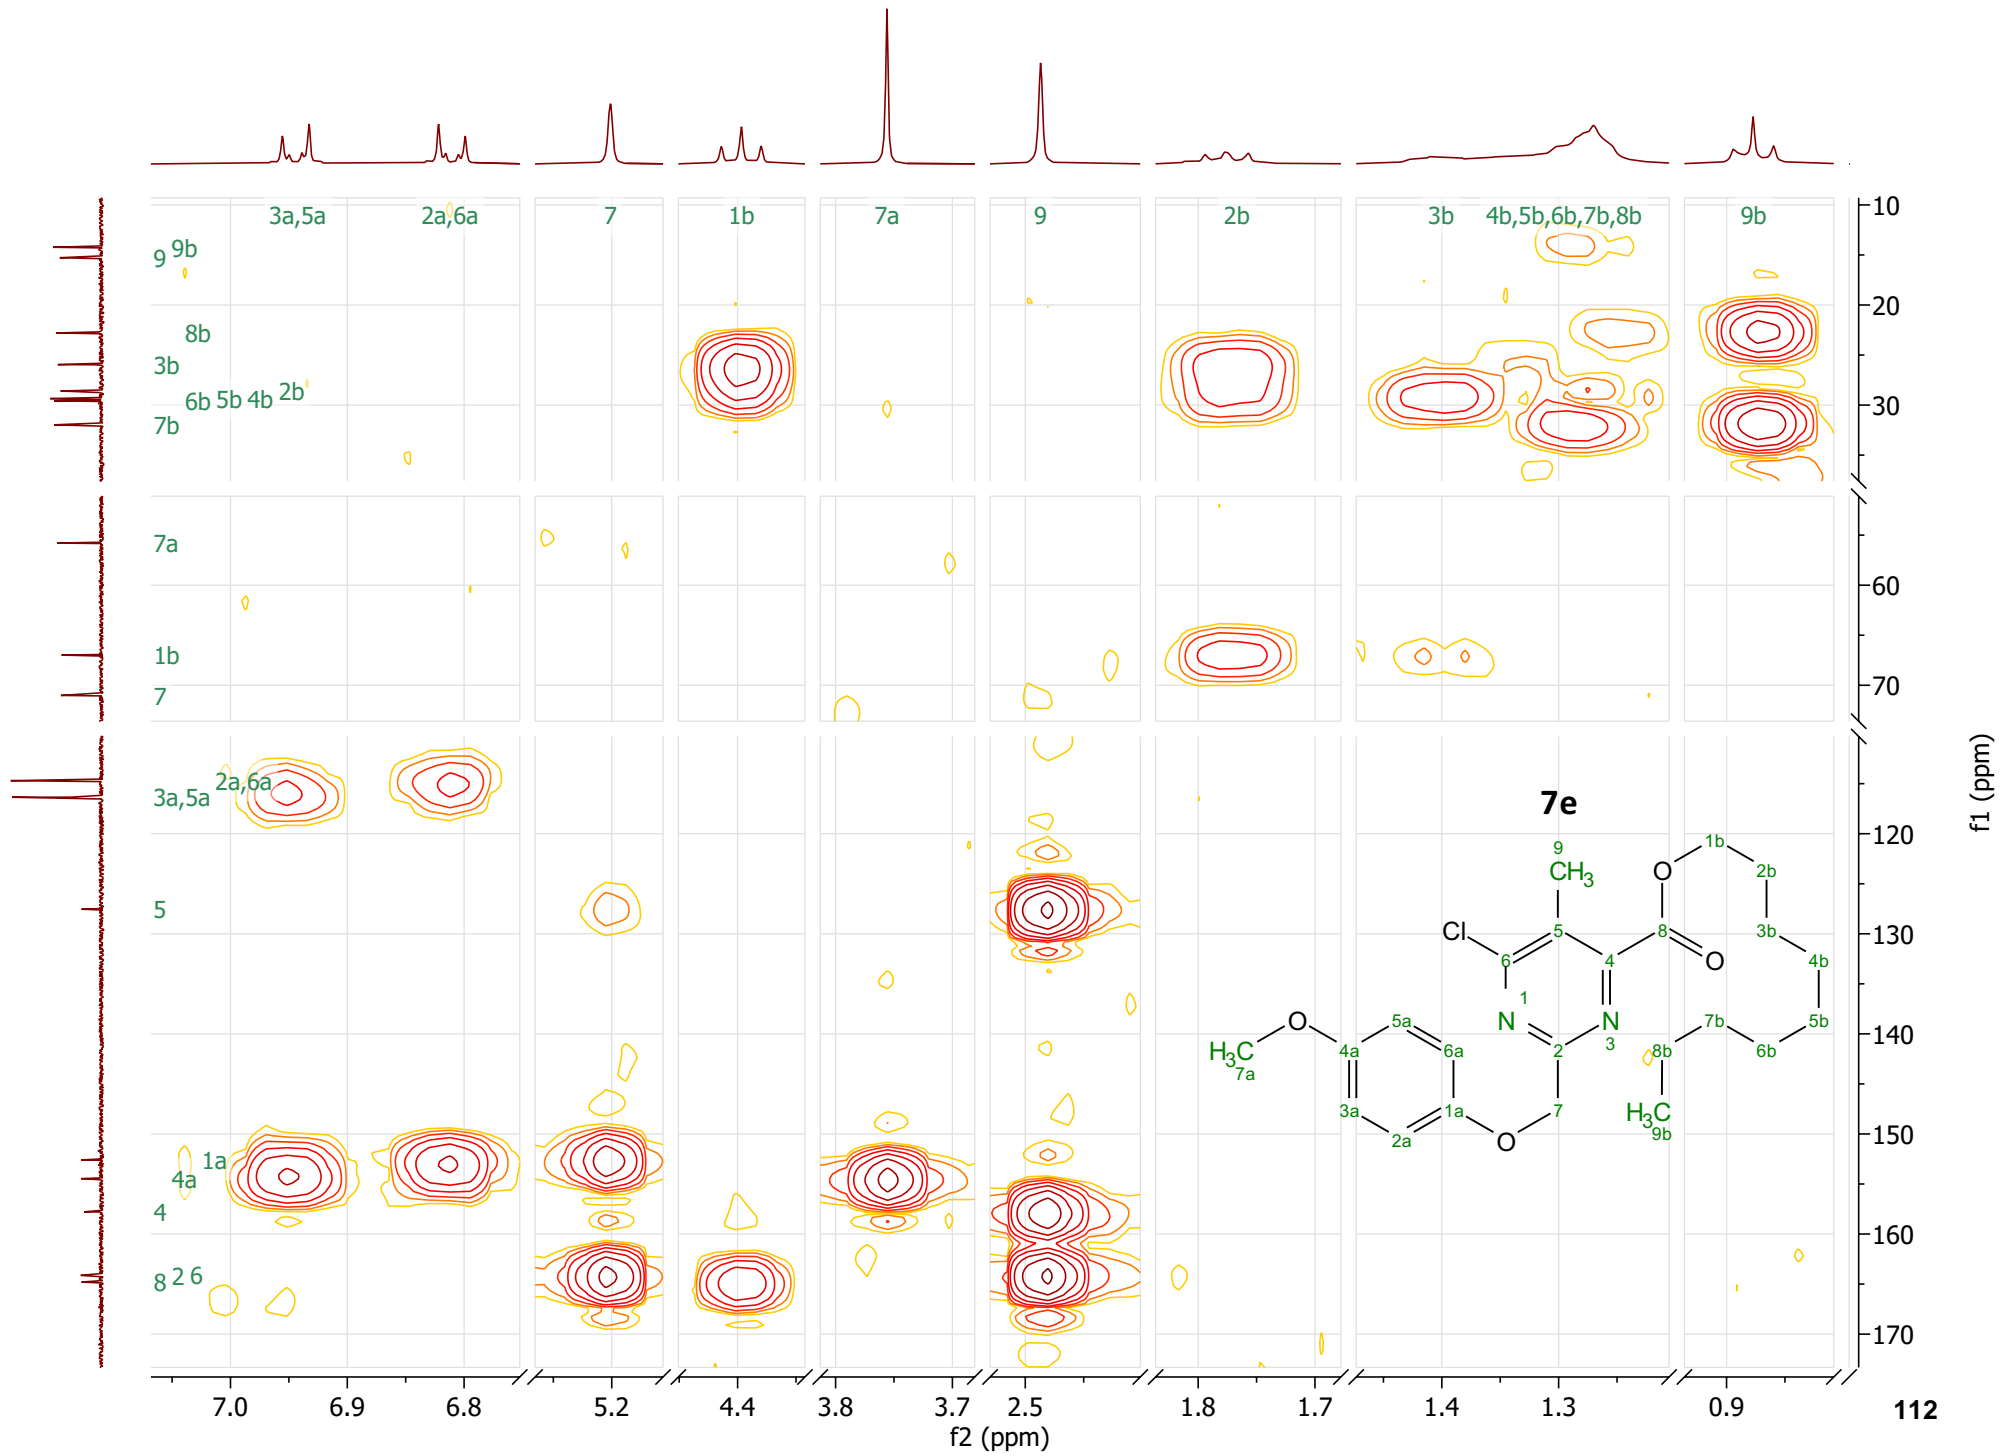



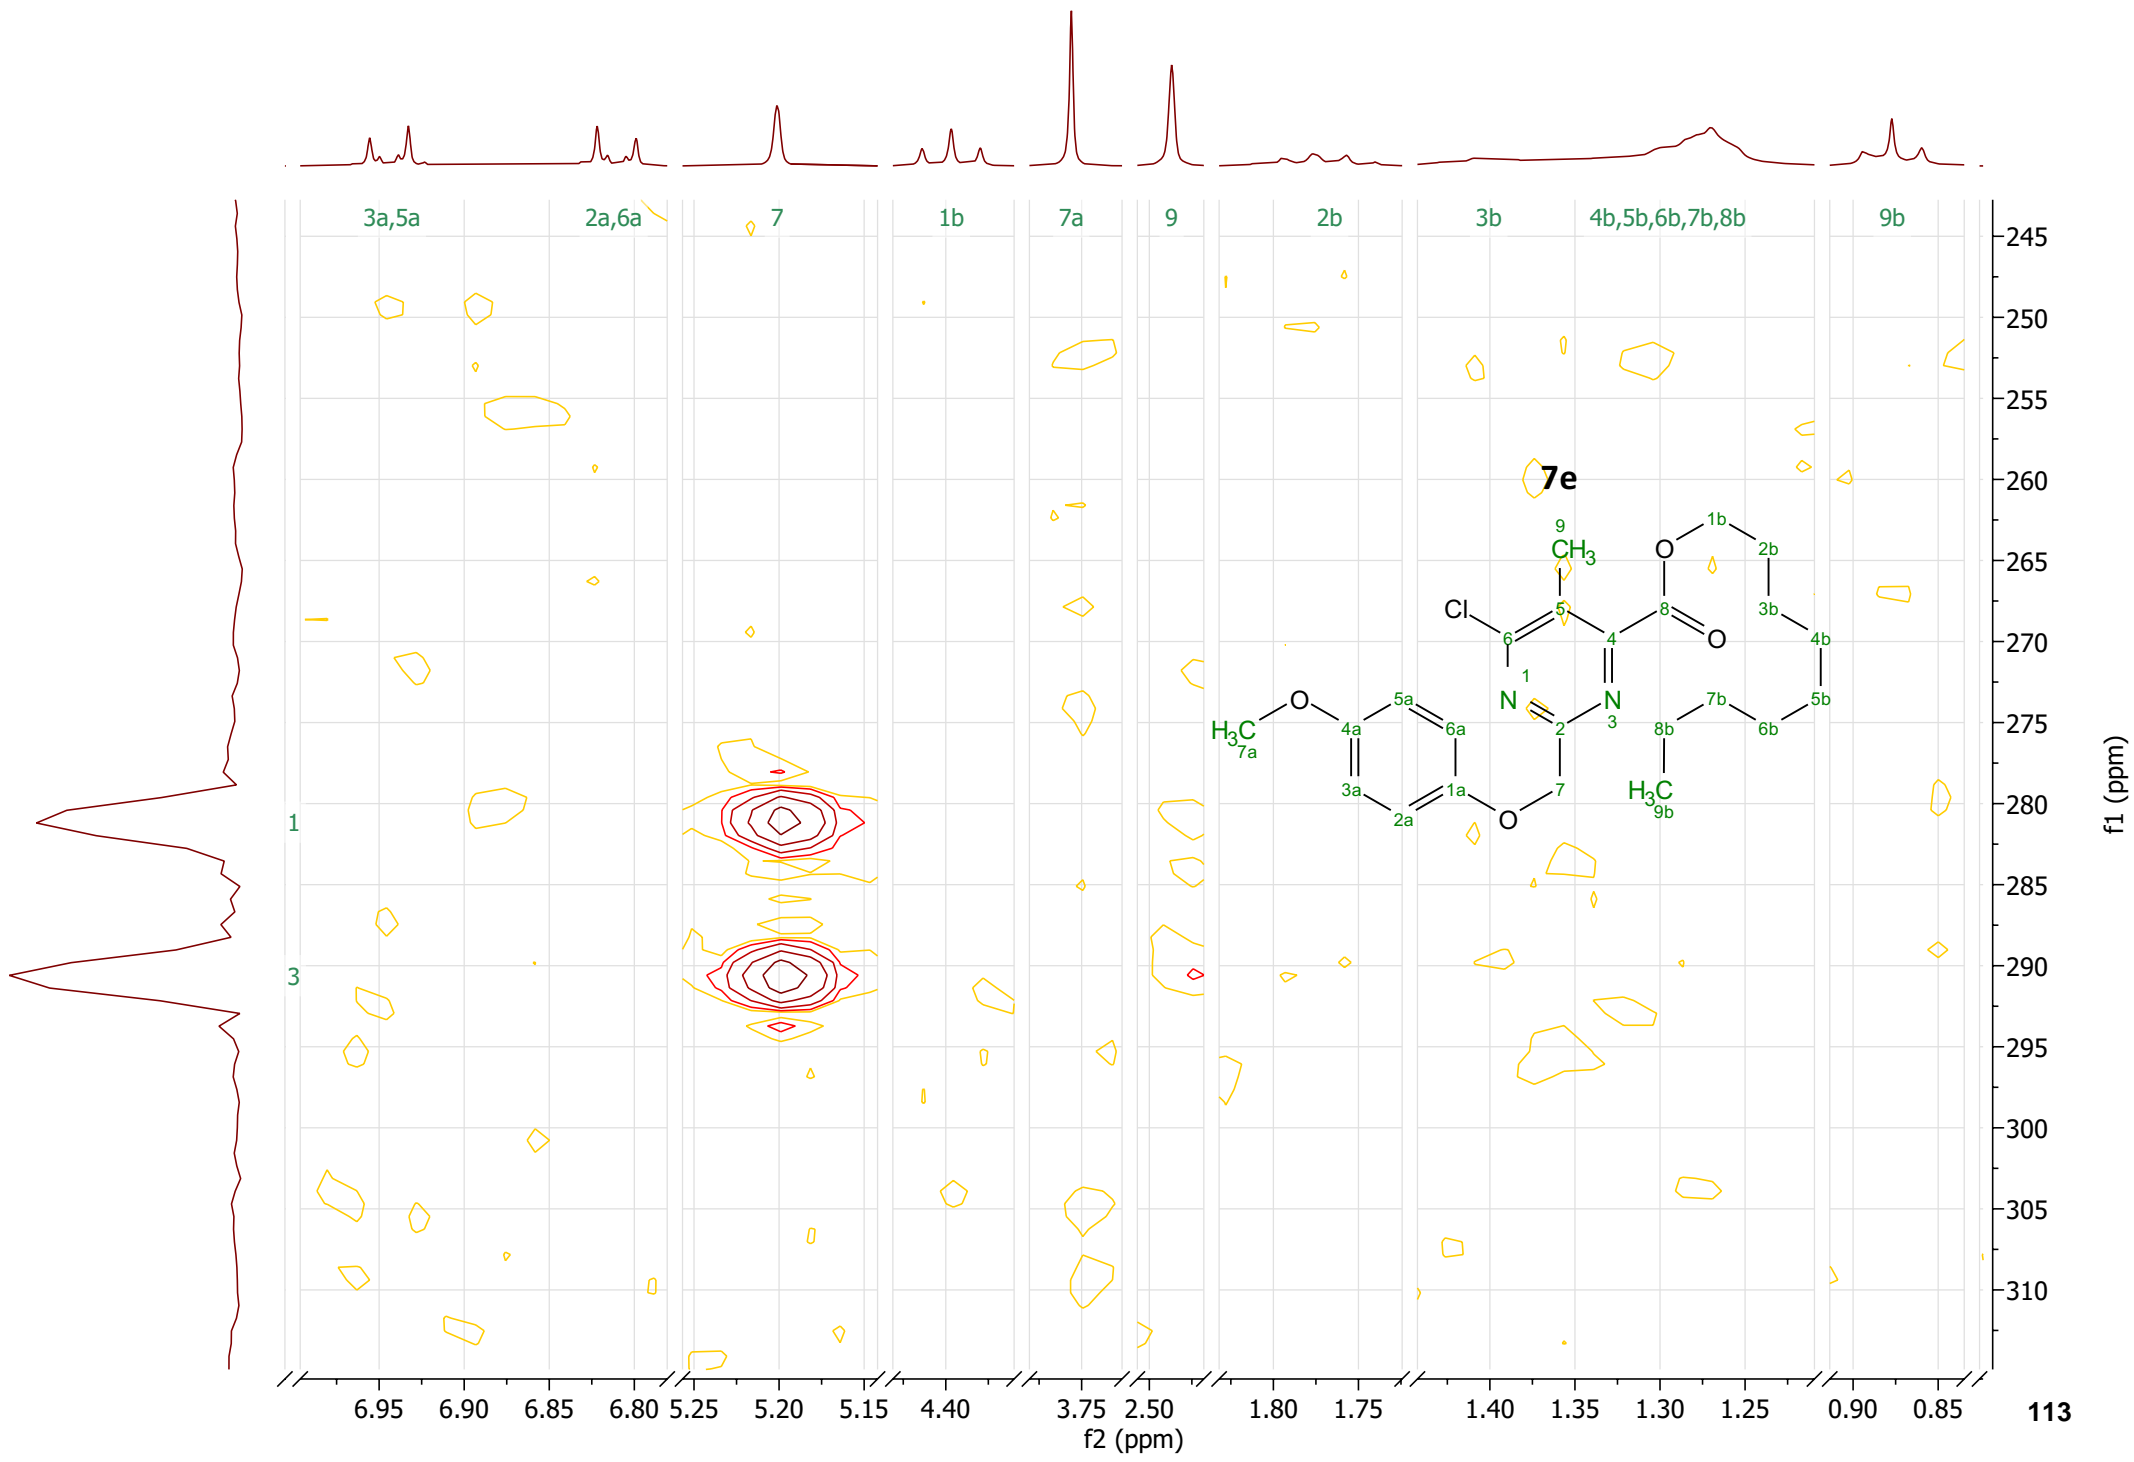

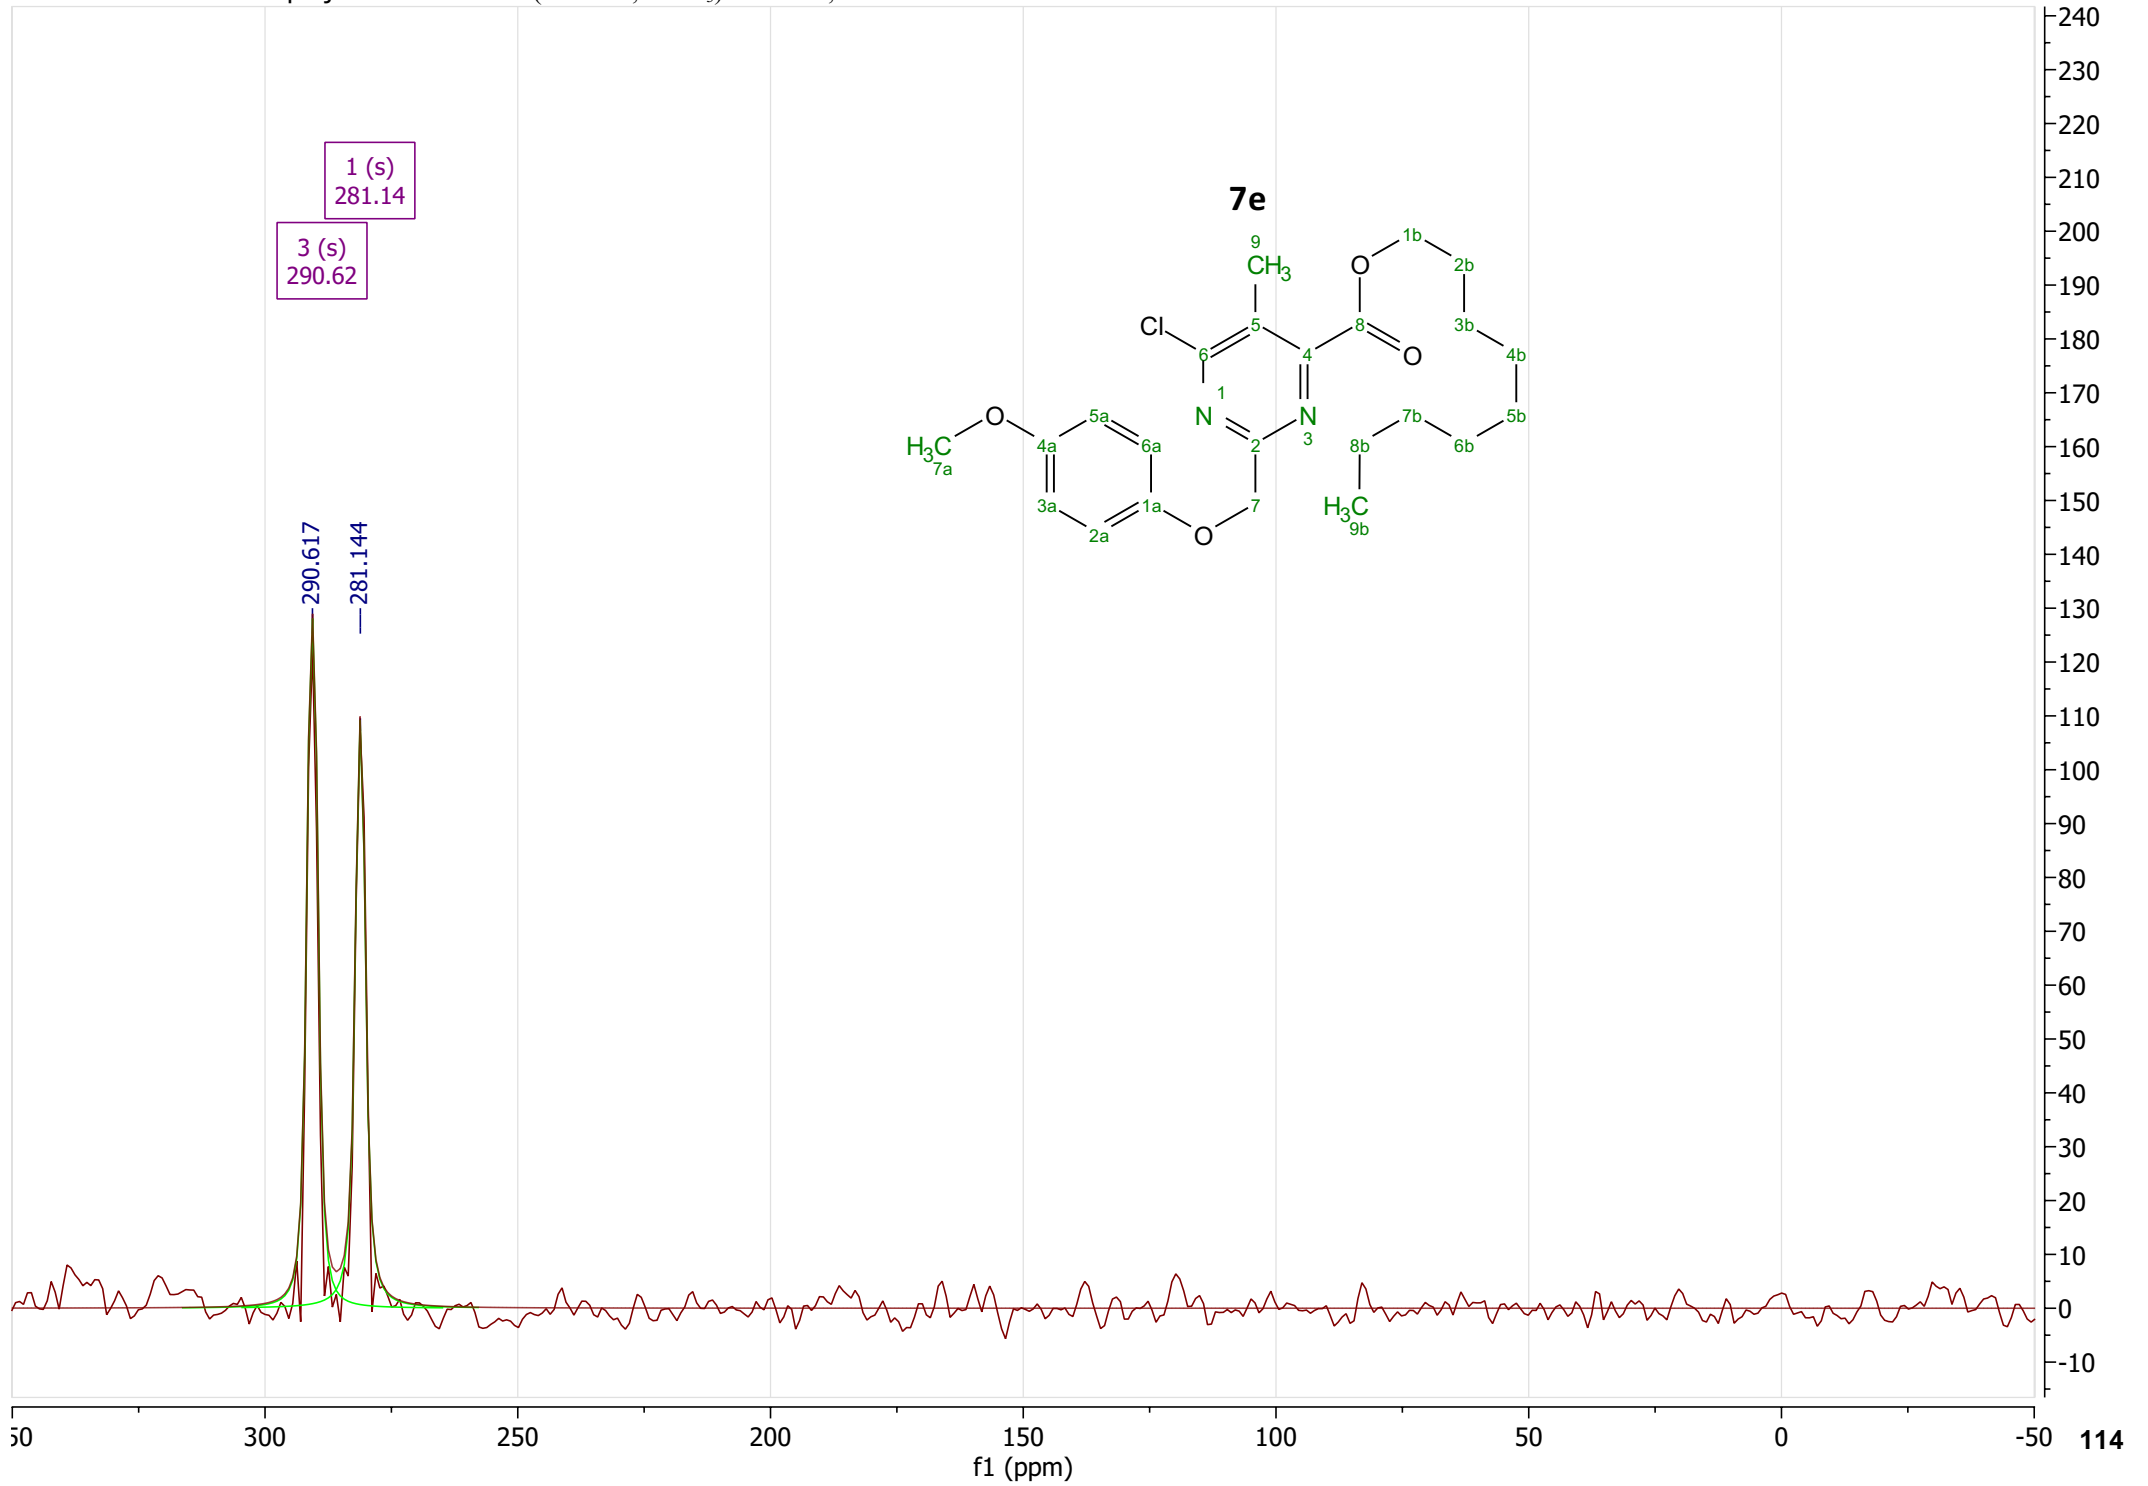

$^1\text{H}$  NMR (400 MHz,  $\text{CDCl}_3$ )  $\delta$  7.71 (br s, 1H), 7.67 – 7.61 (m, 1H), 7.65 – 7.59 (m, 1H), 7.57 – 7.48 (m, 1H), 6.98 – 6.87 (m, 2H), 6.84 – 6.76 (m, 2H), 5.47 (s, 2H), 5.21 (app d,  $J = 0.6$  Hz, 2H), 3.75 (s, 3H), 2.47 (app t,  $J = 0.6$  Hz, 3H).

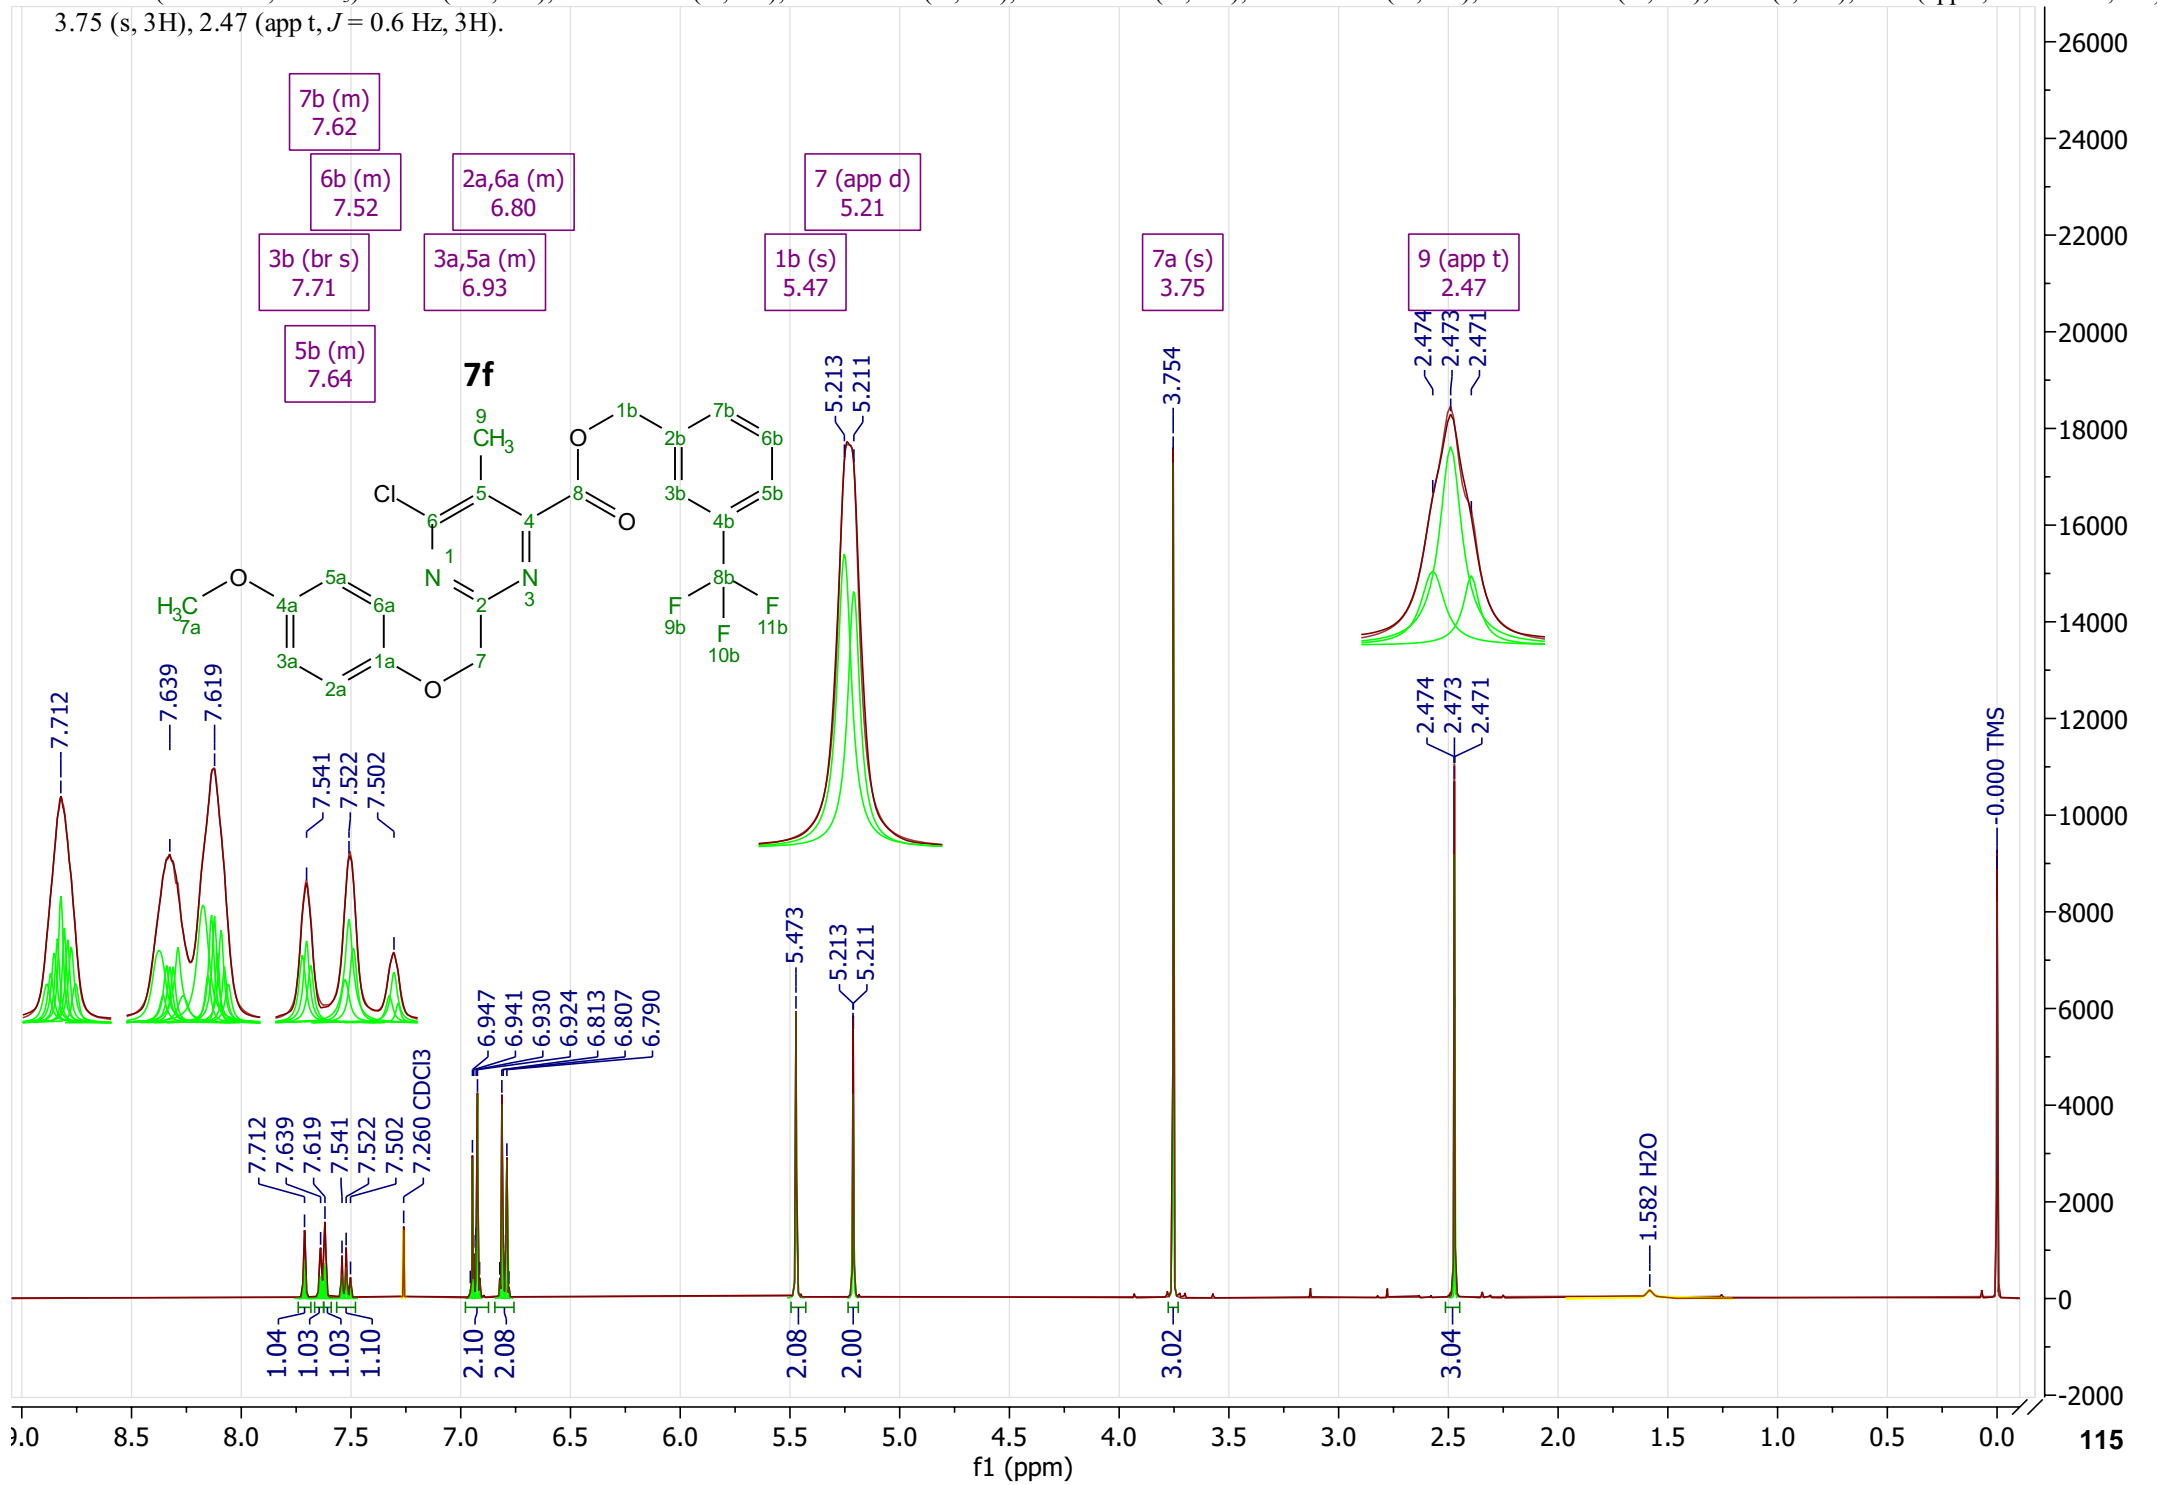

GHG103.10.fid —  $^{13}\text{C}$  NMR (101 MHz,  $\text{CDCl}_3$ )  $\delta$  164.32, 164.30, 164.2, 156.7, 154.5, 152.5, 135.9, 131.8 (app q,  $J = 1.1$  Hz), 131.4 (q,  $J = 32.5$  Hz), 129.5, 128.1, 125.7 (q,  $J = 3.8$  Hz), 125.2 (q,  $J = 3.8$  Hz), 124.0 (q,  $J = 272.3$  Hz), 116.3 (sym, 2C), 114.7 (sym, 2C), 70.9, 67.2, 55.8, 15.2.

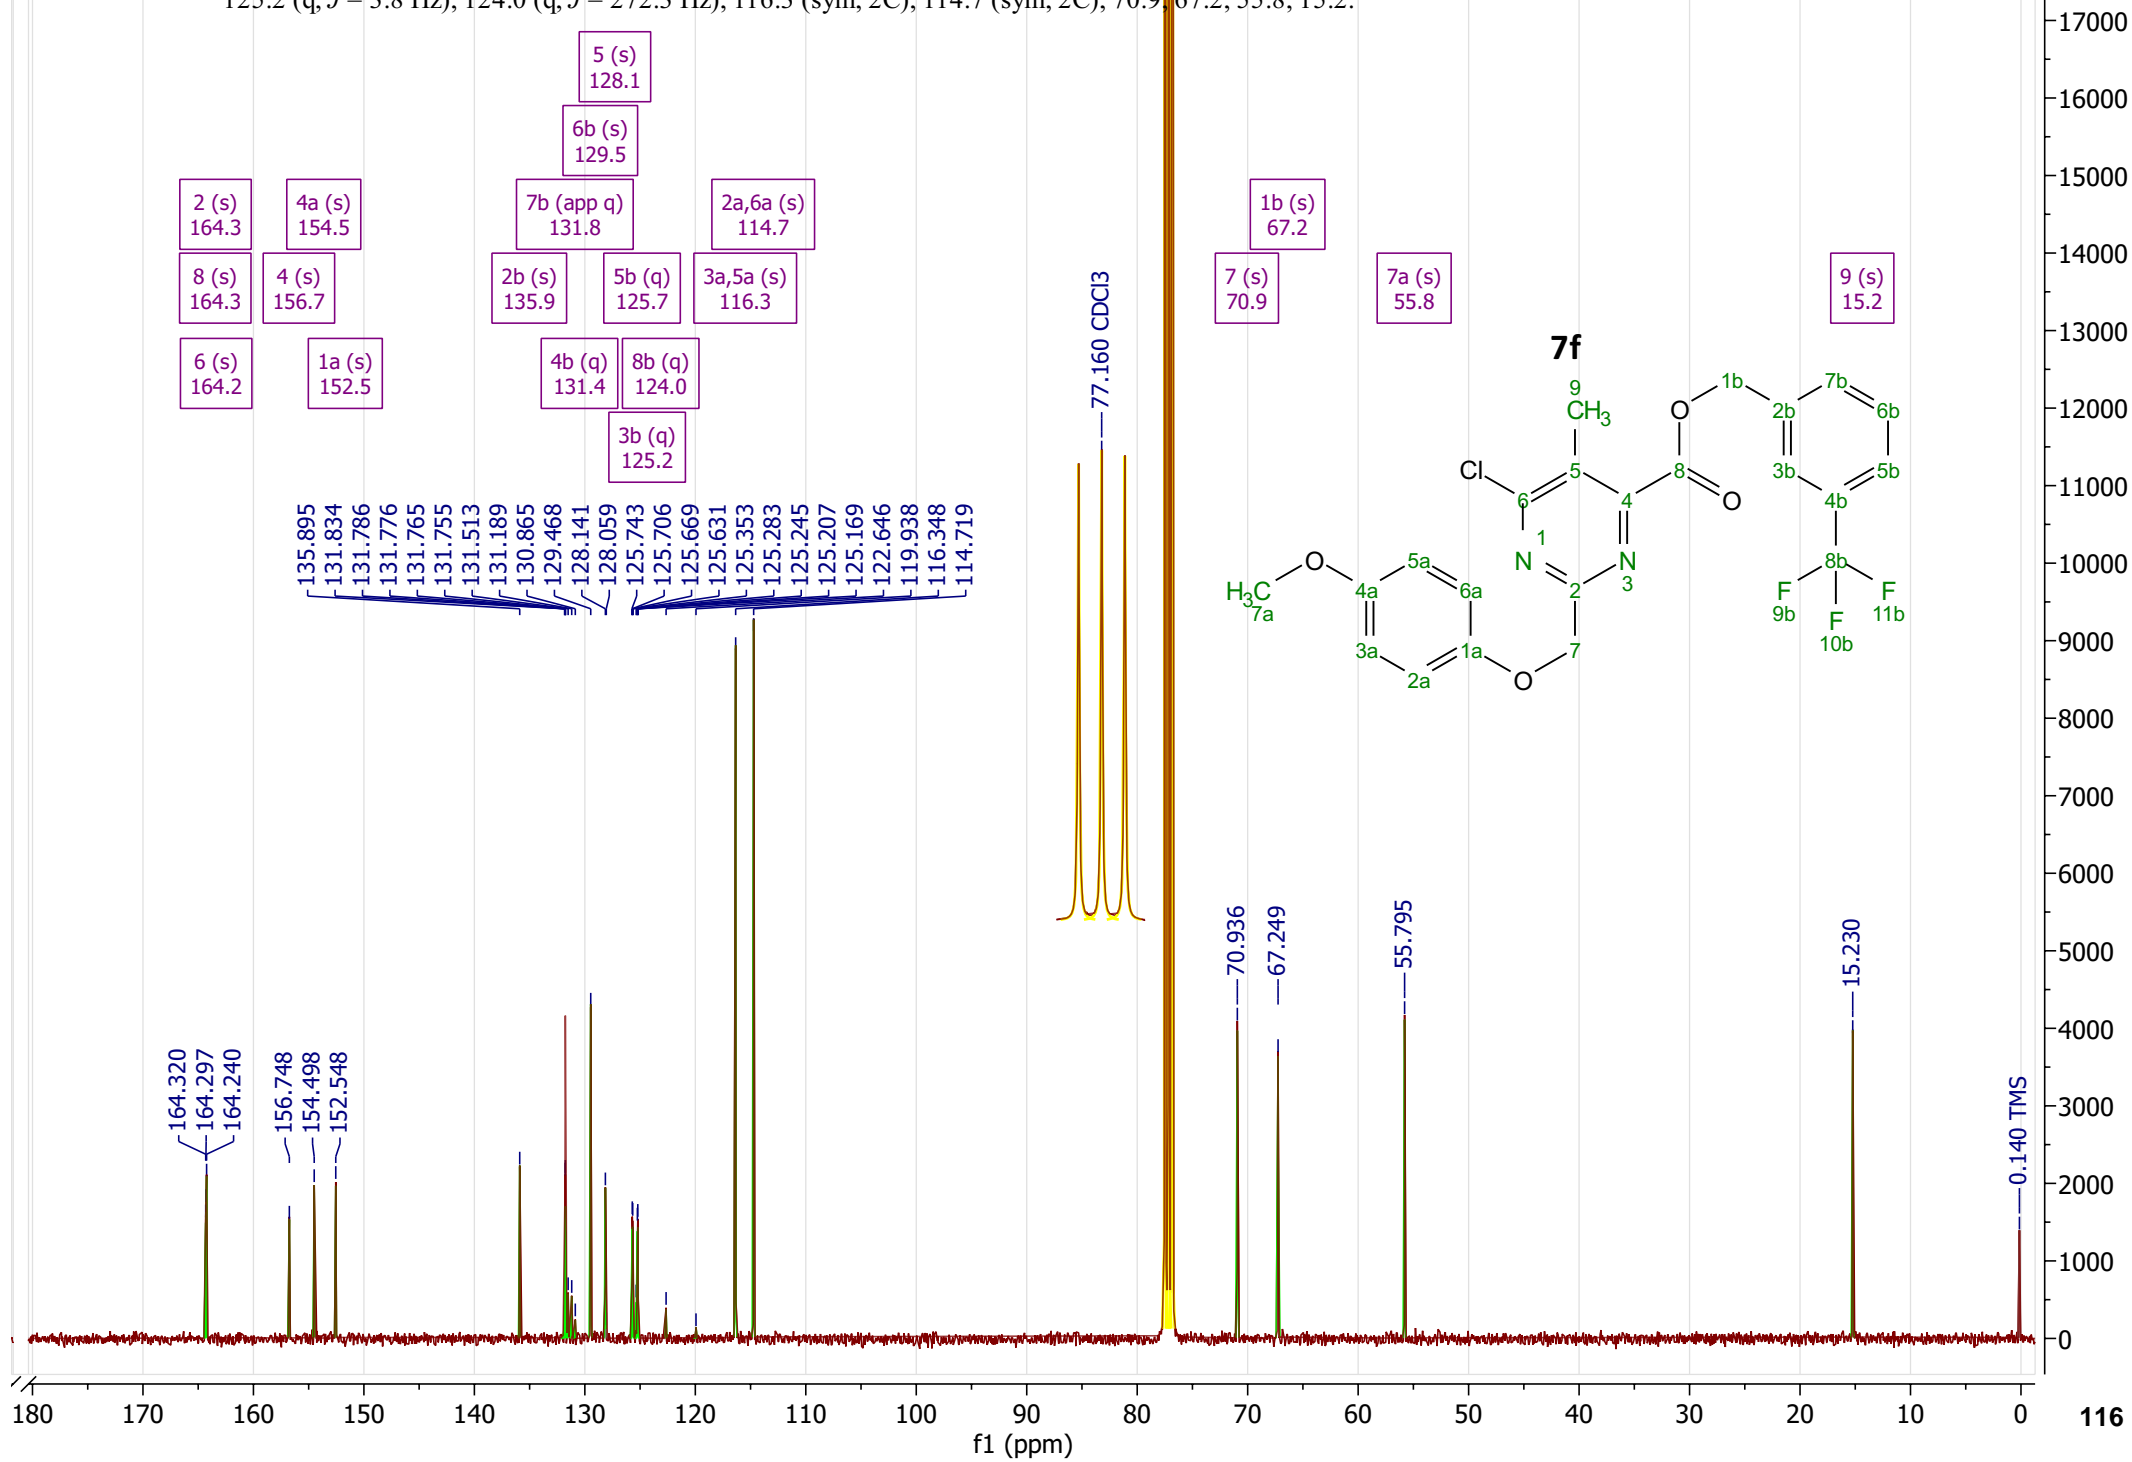

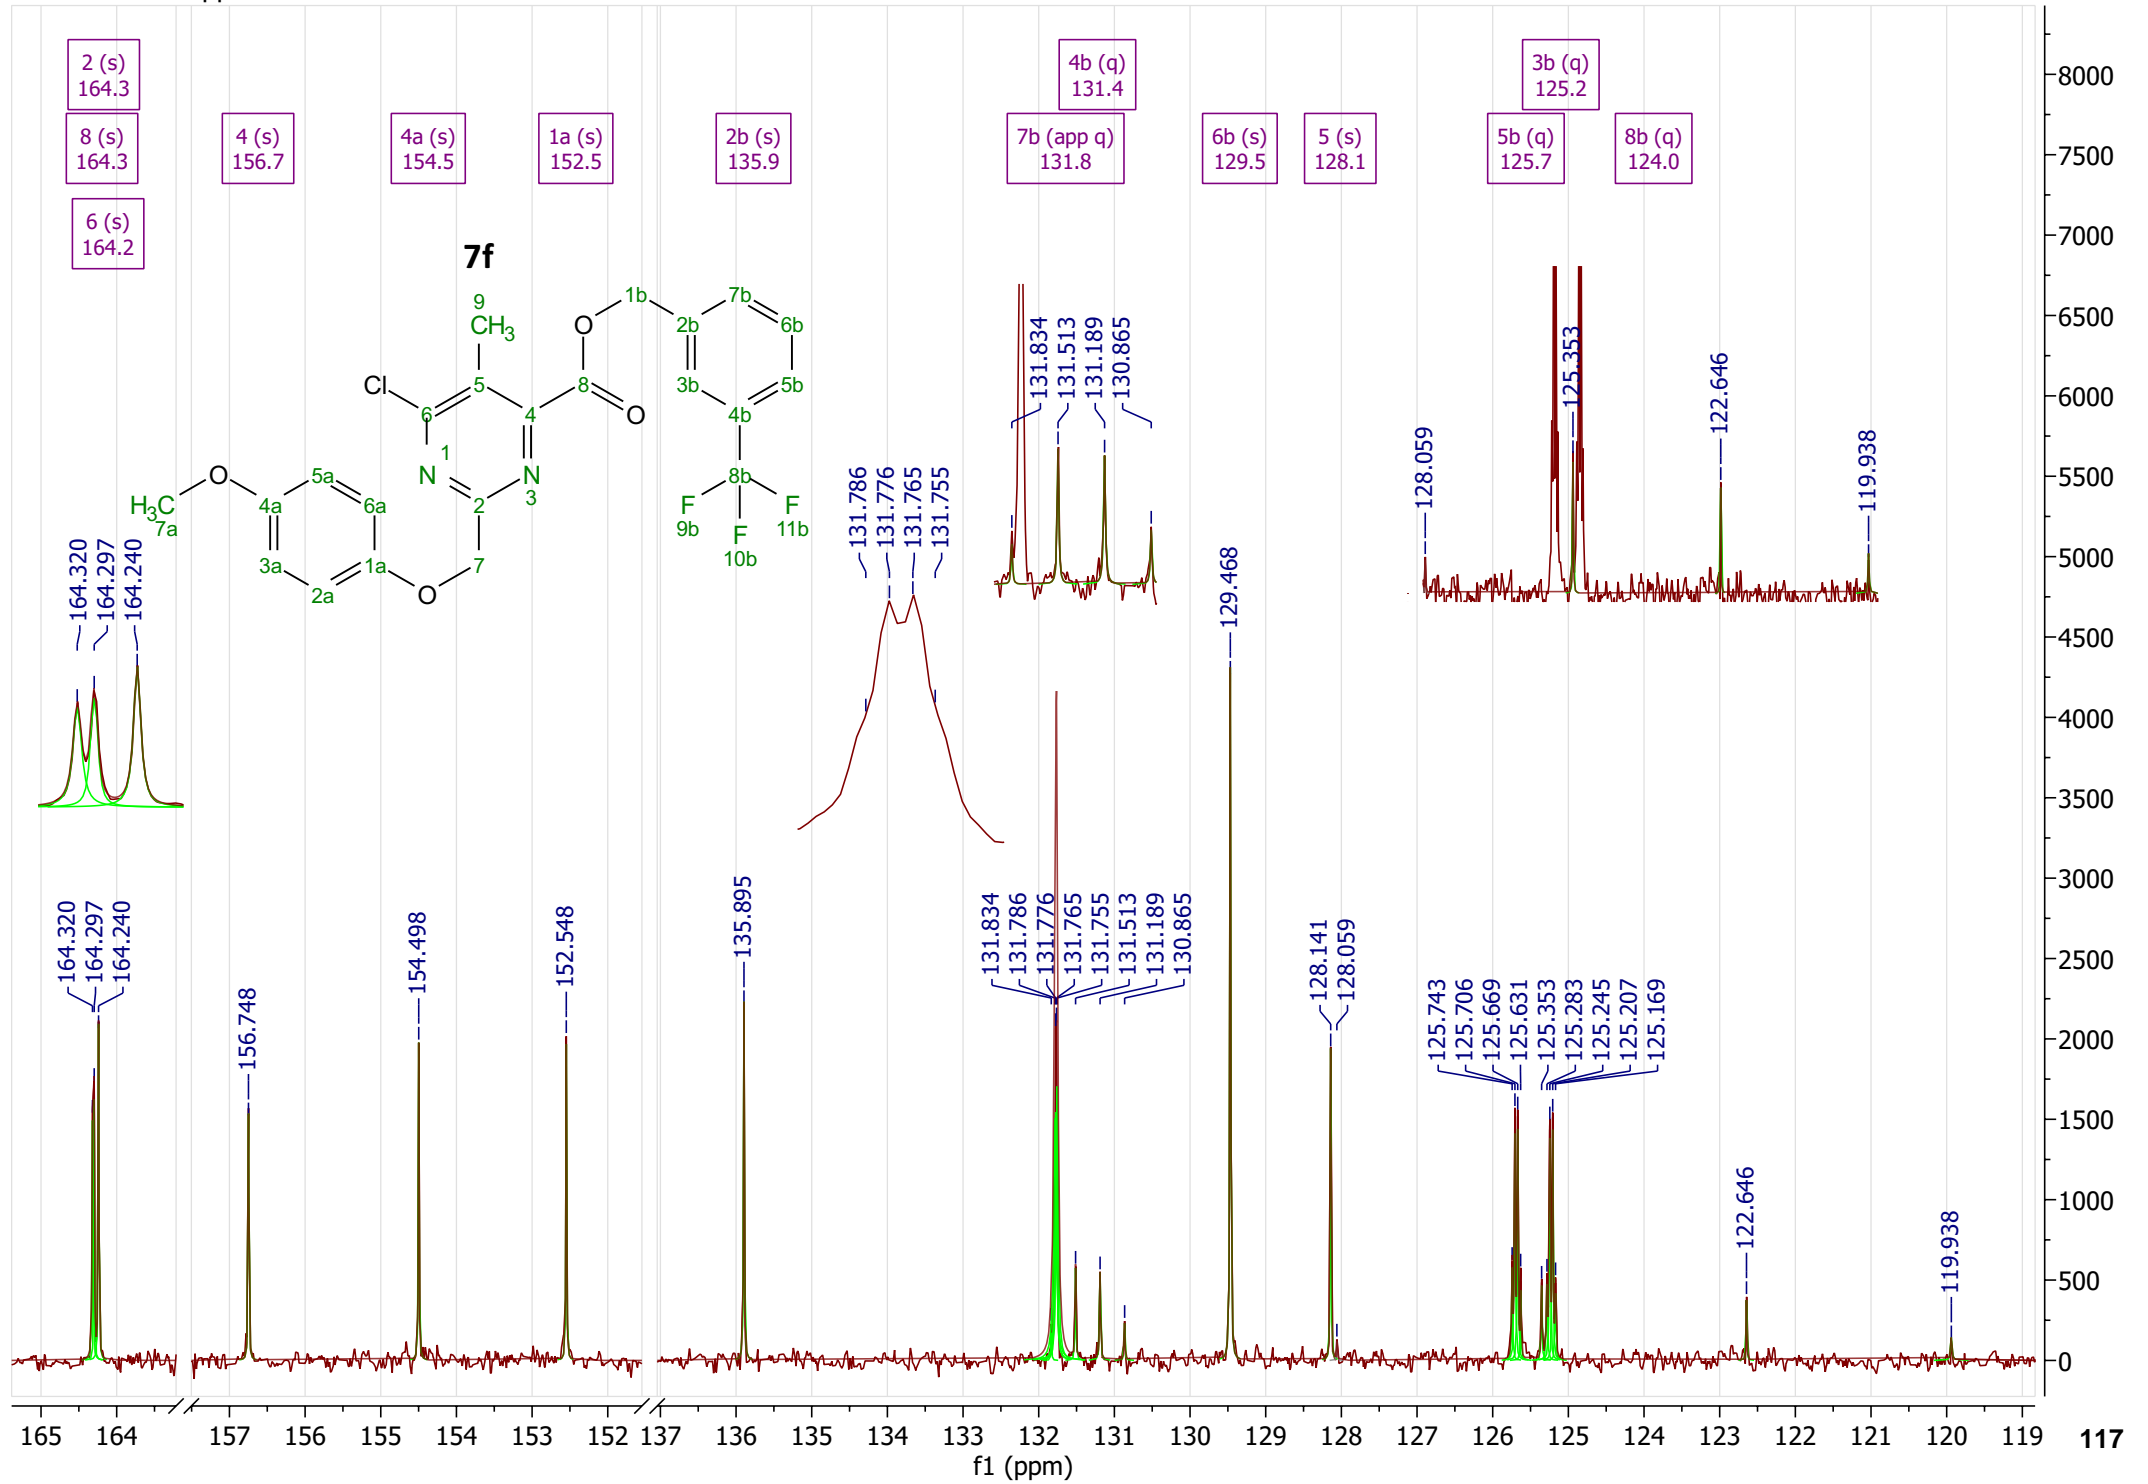

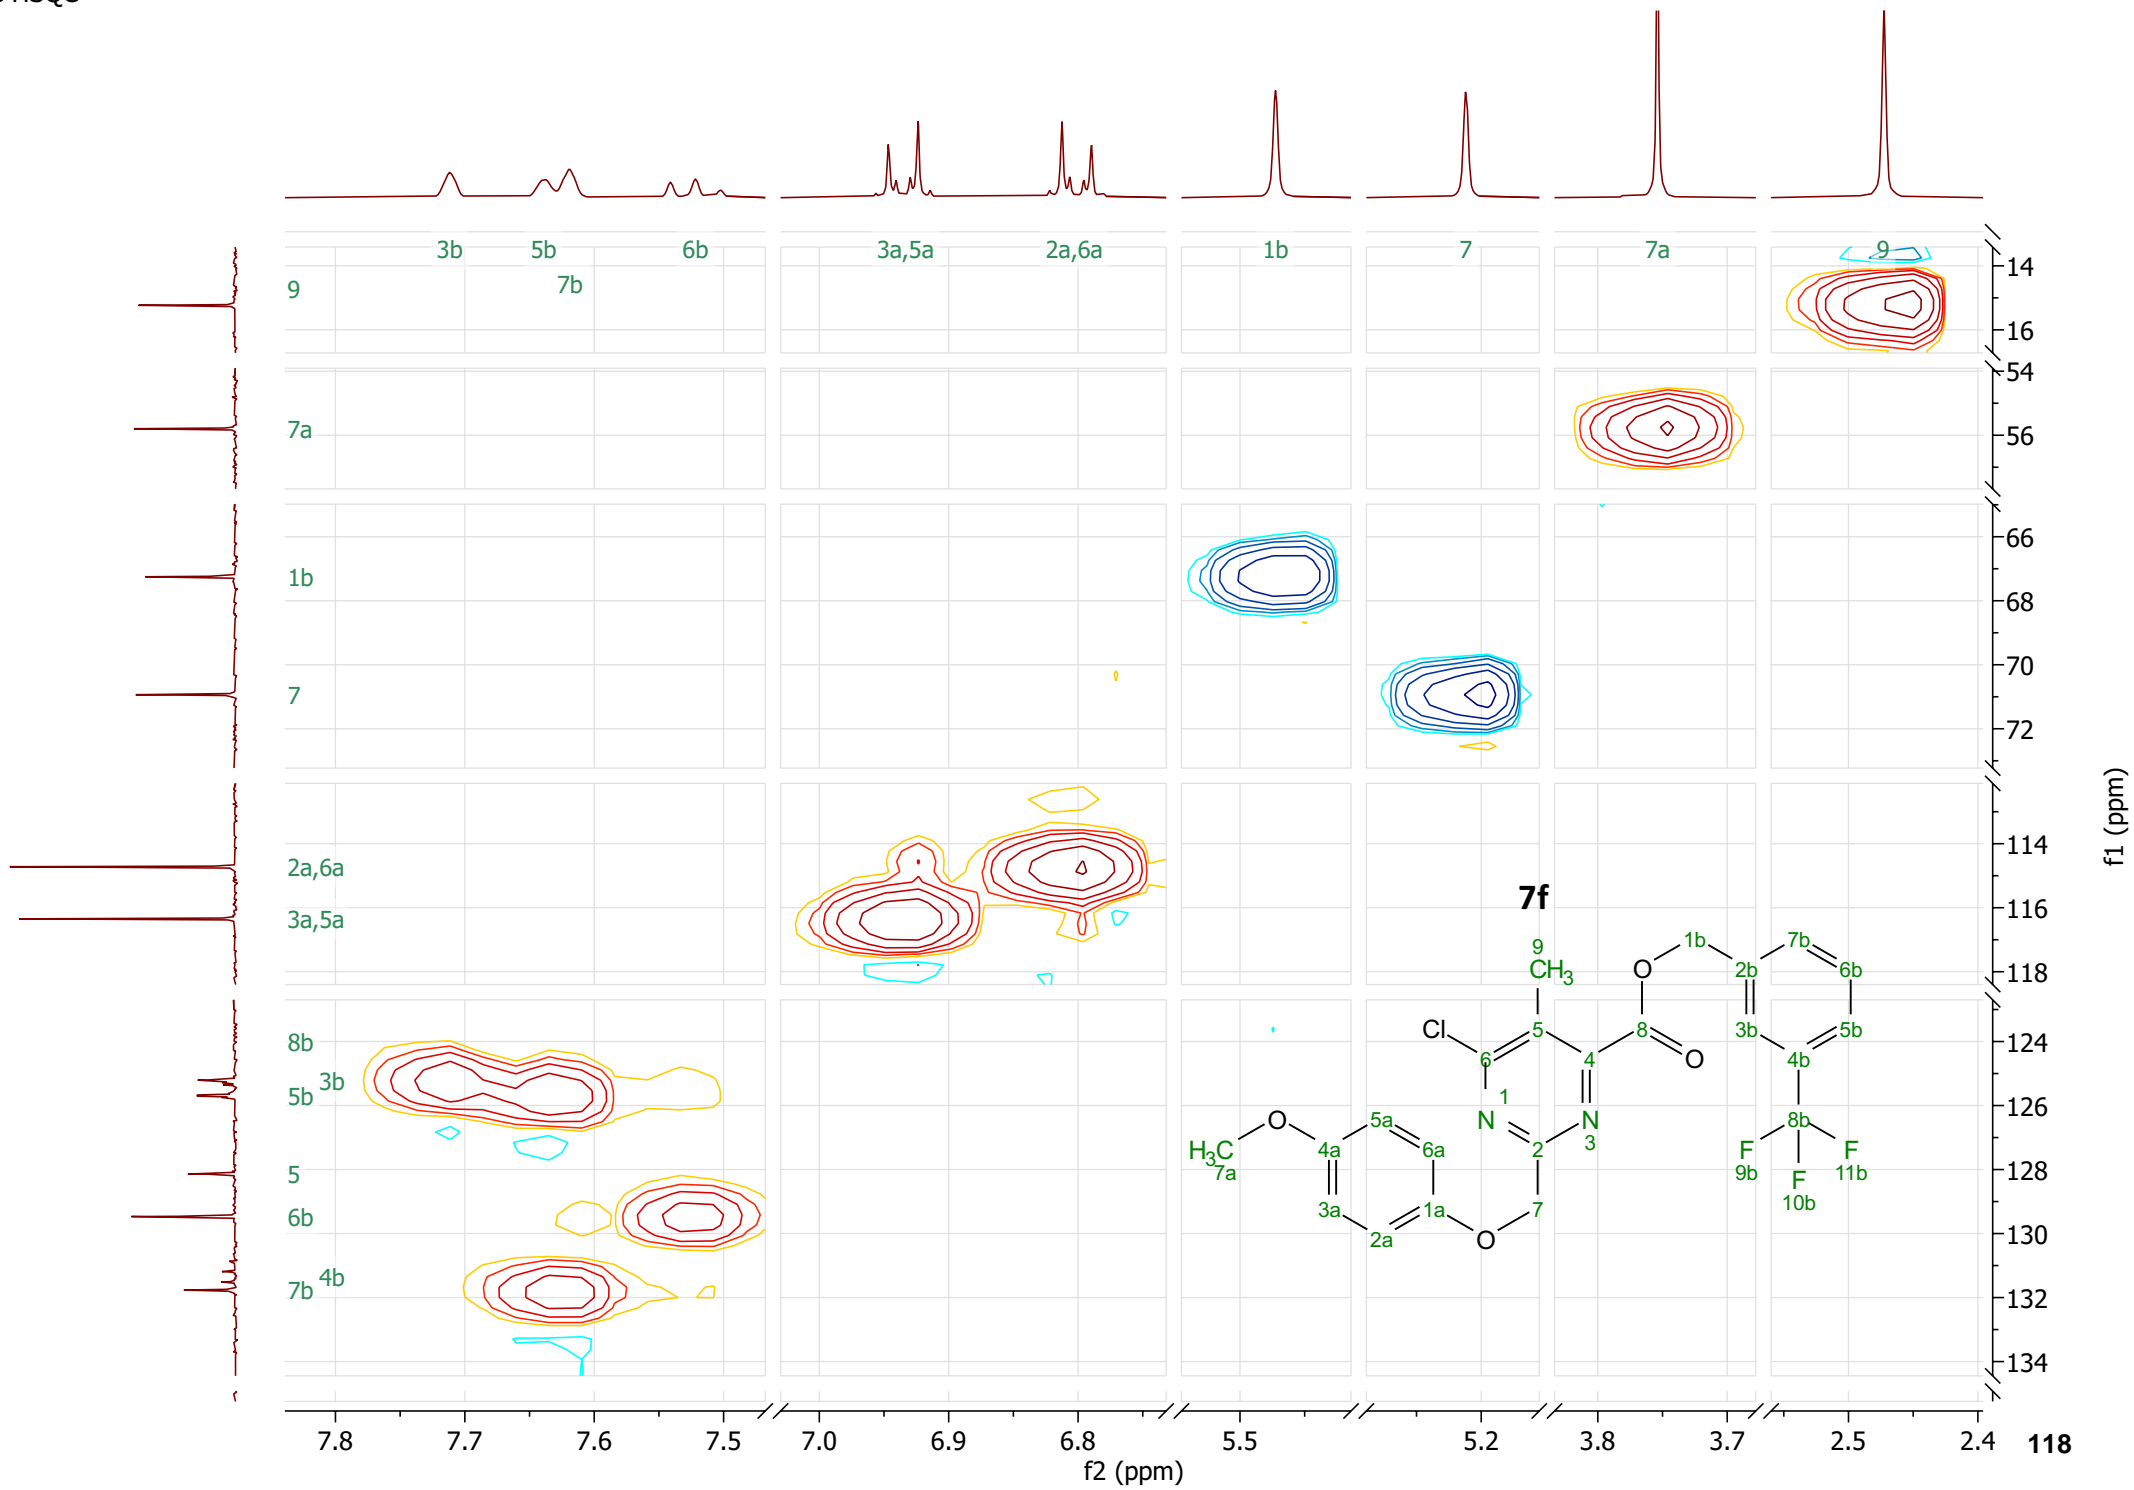

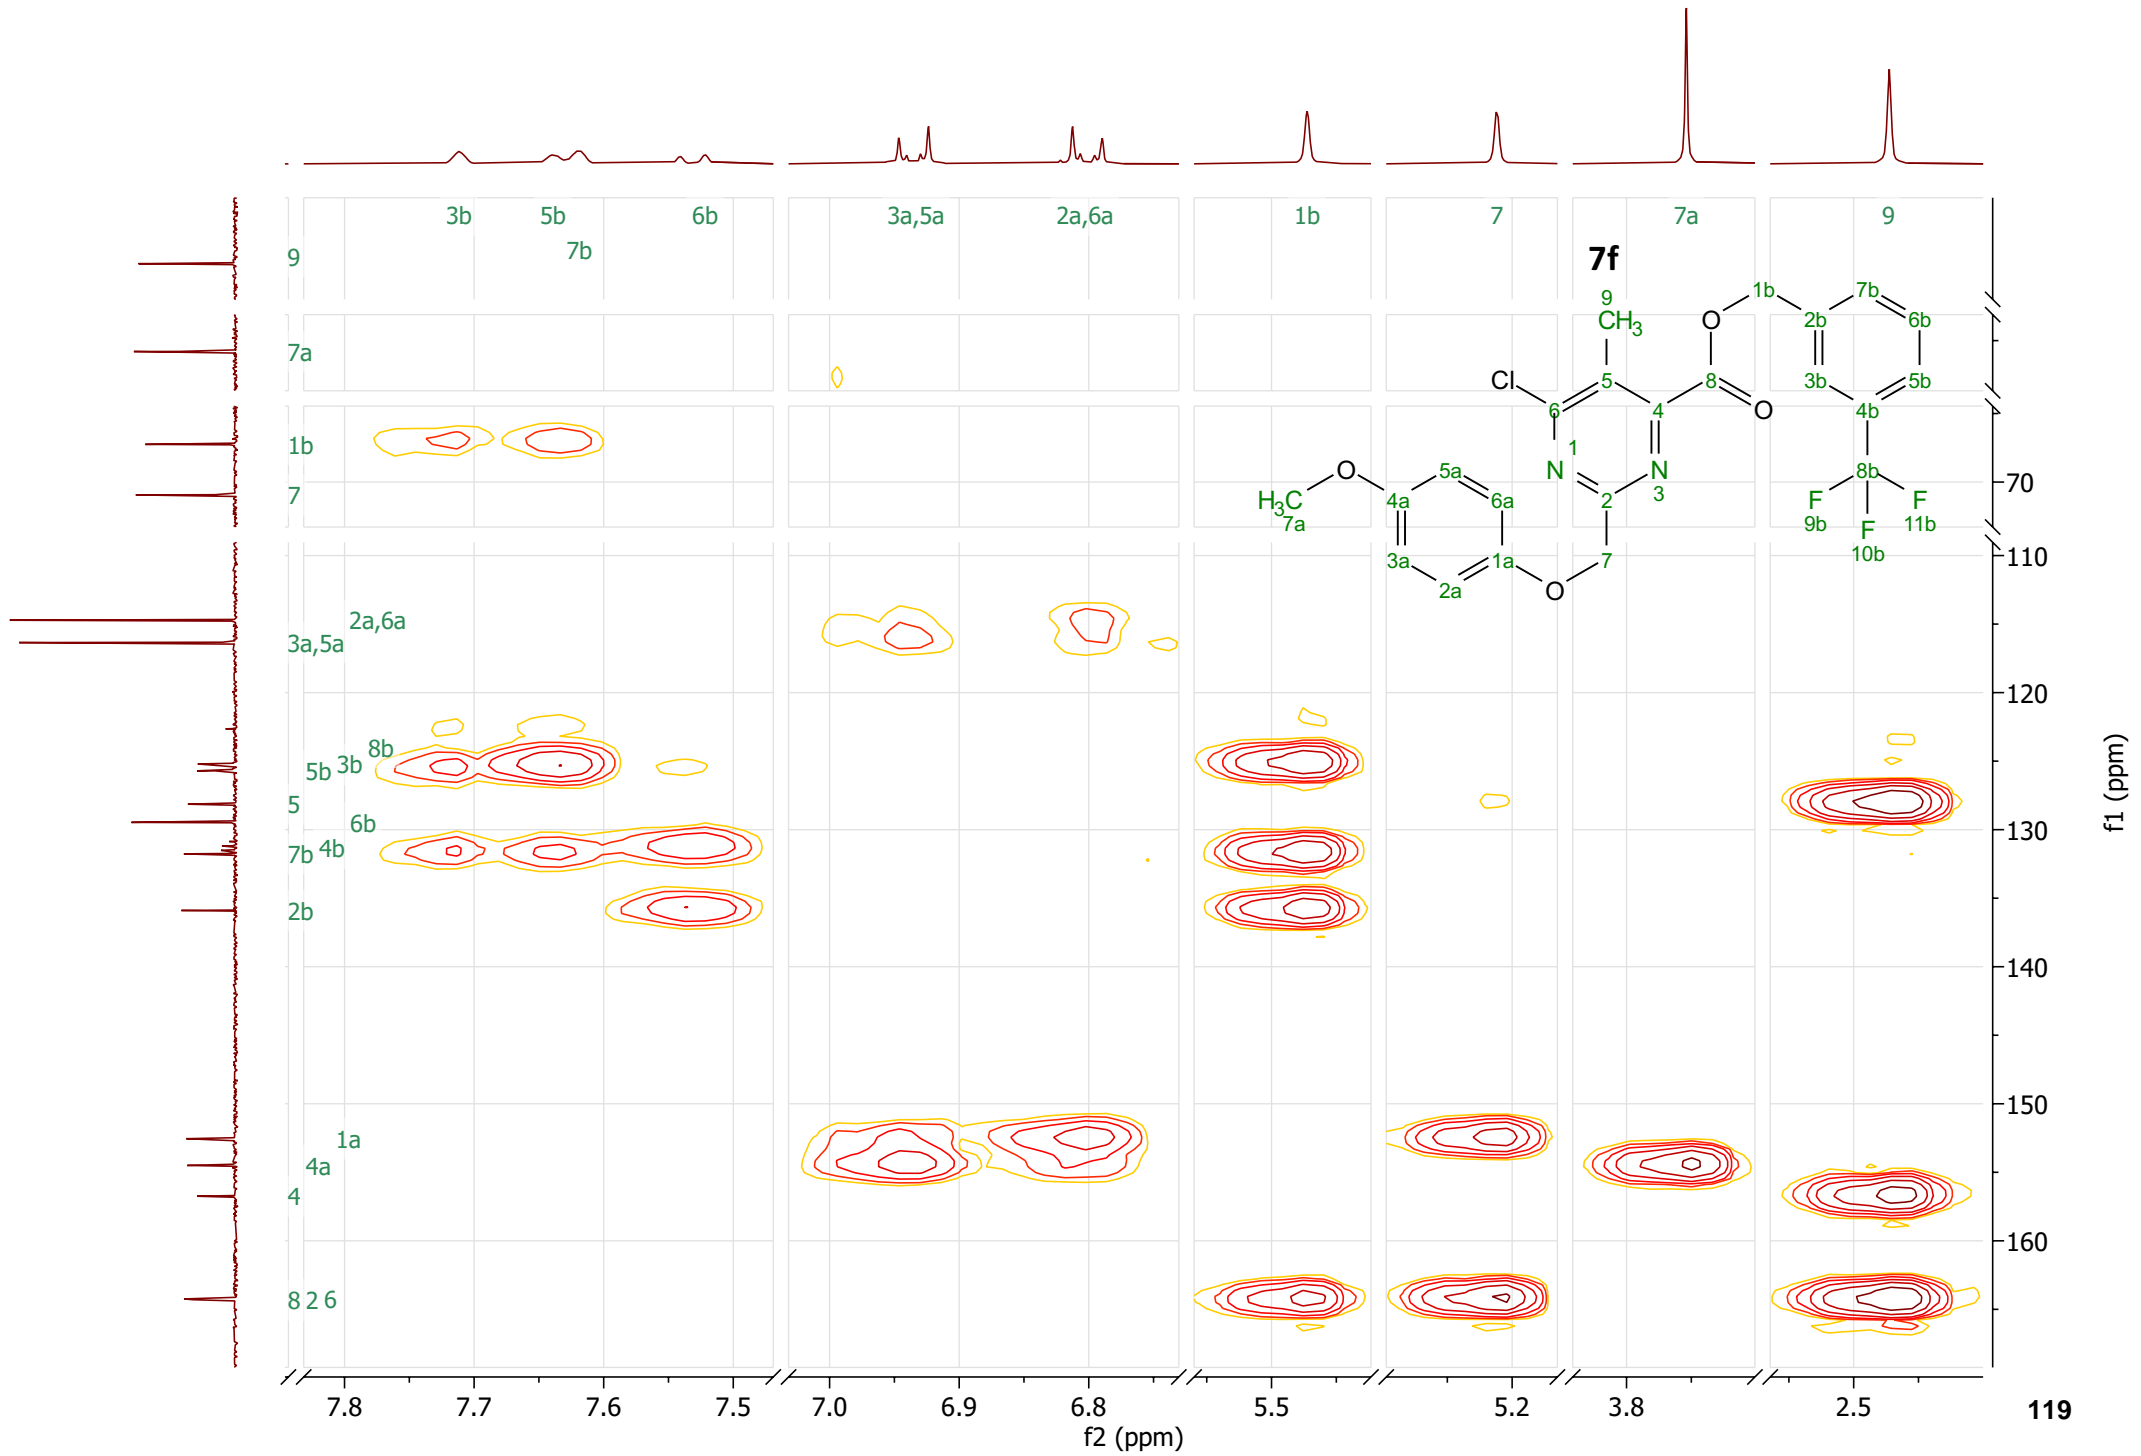

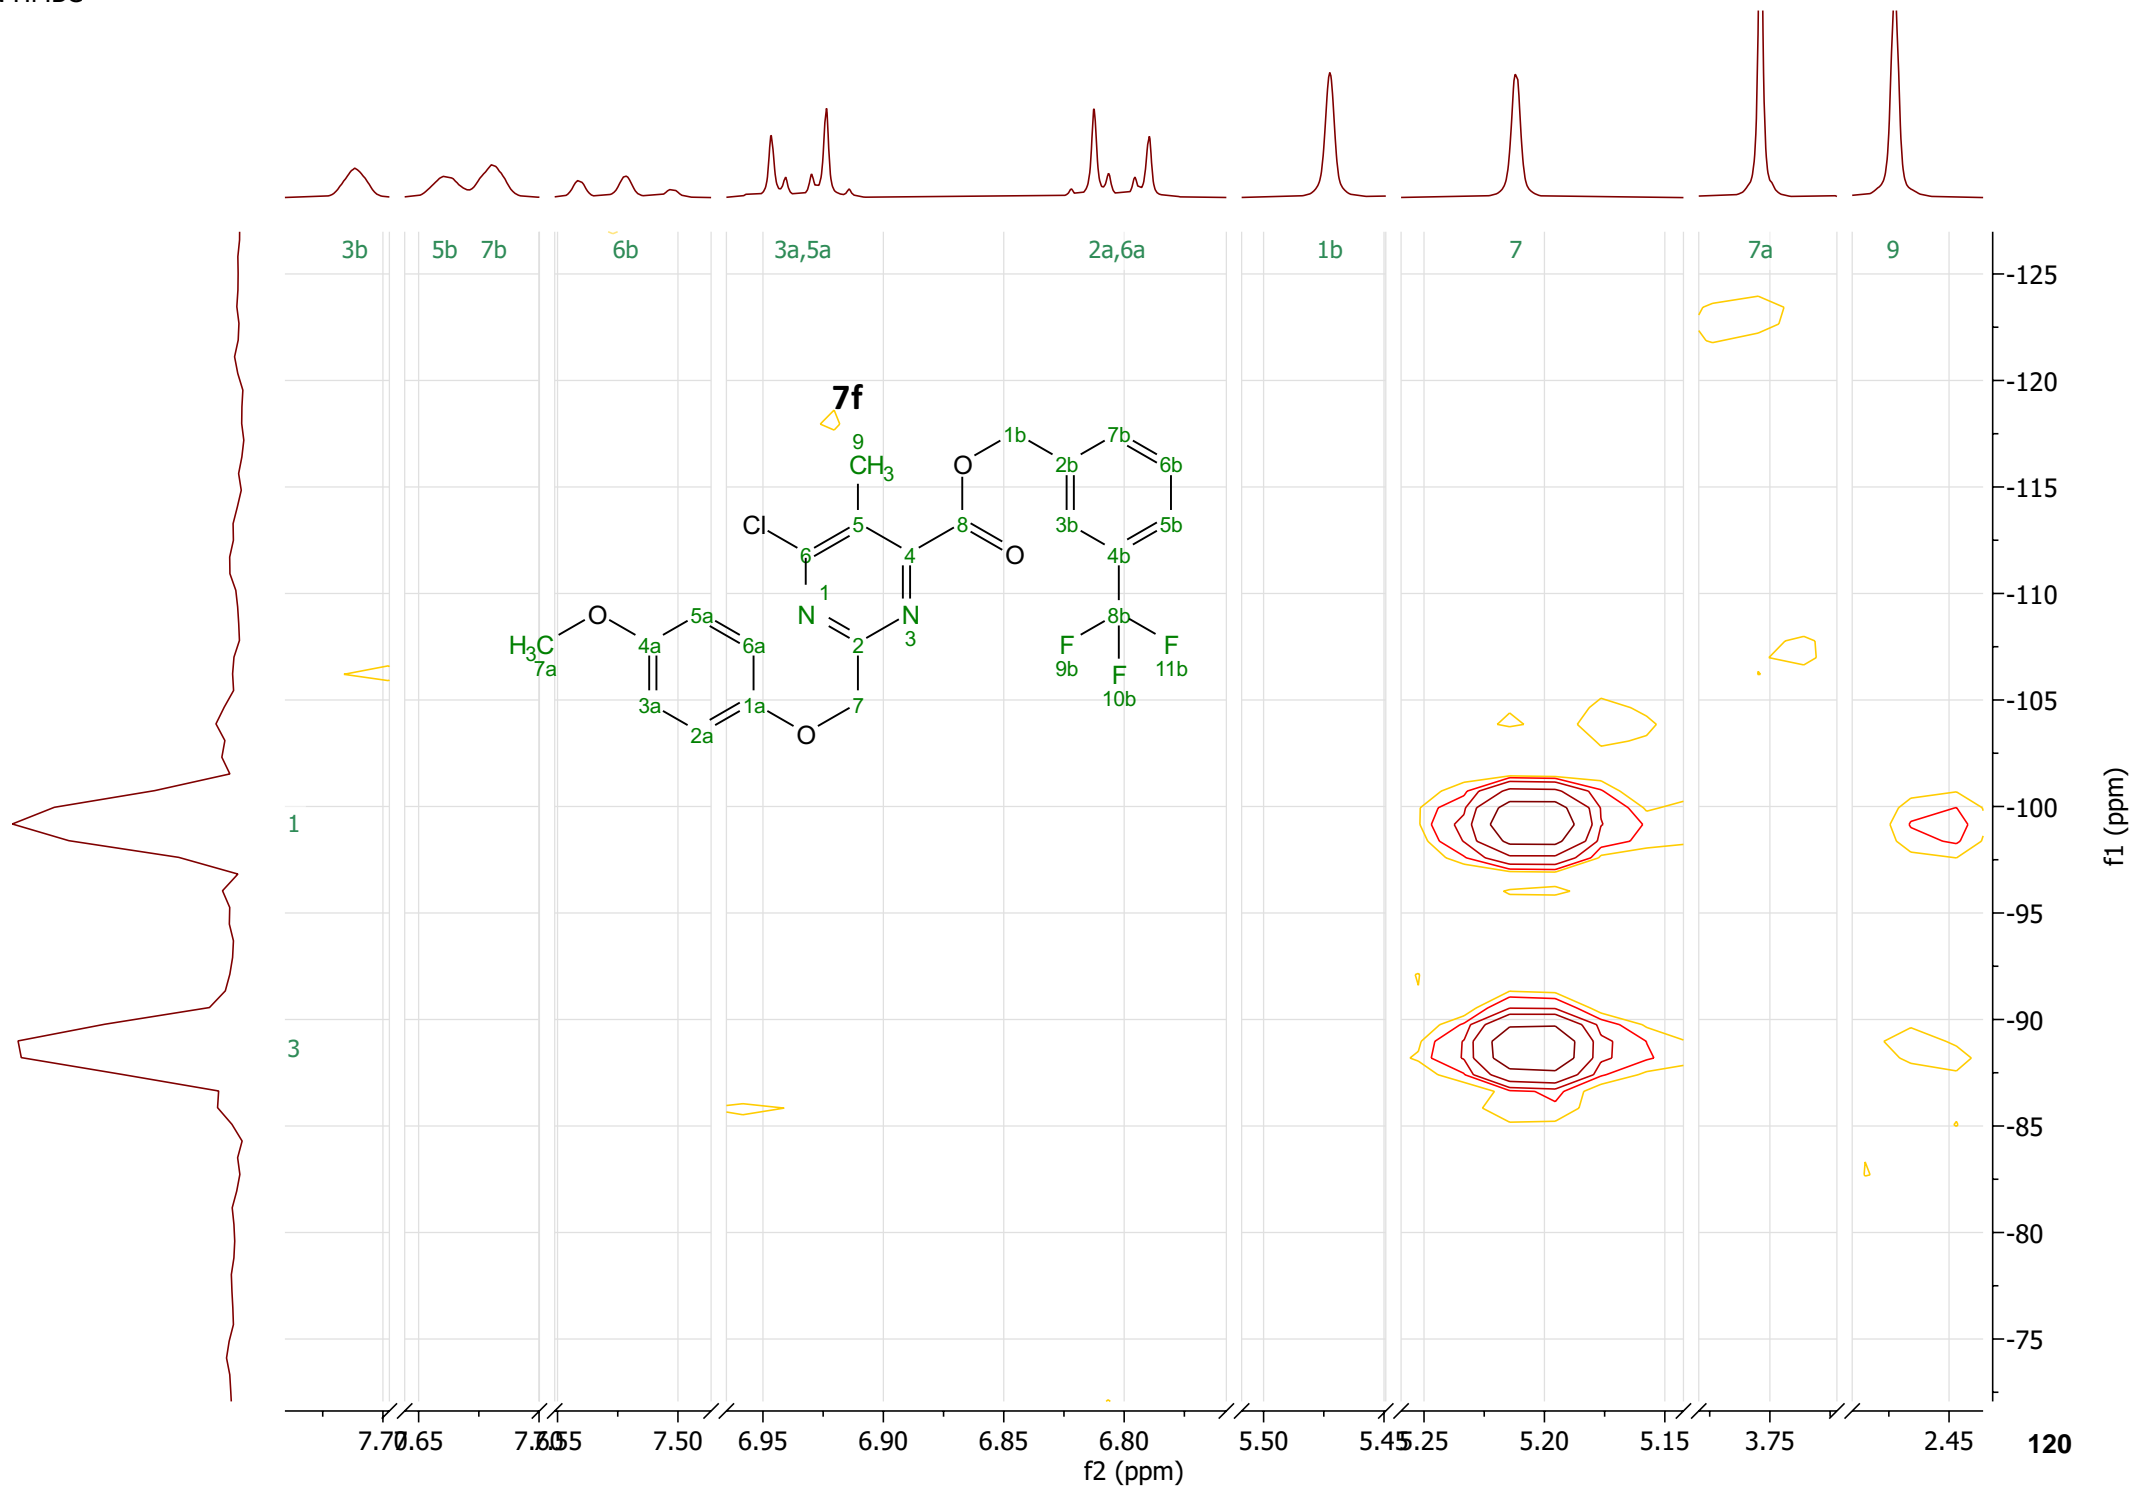



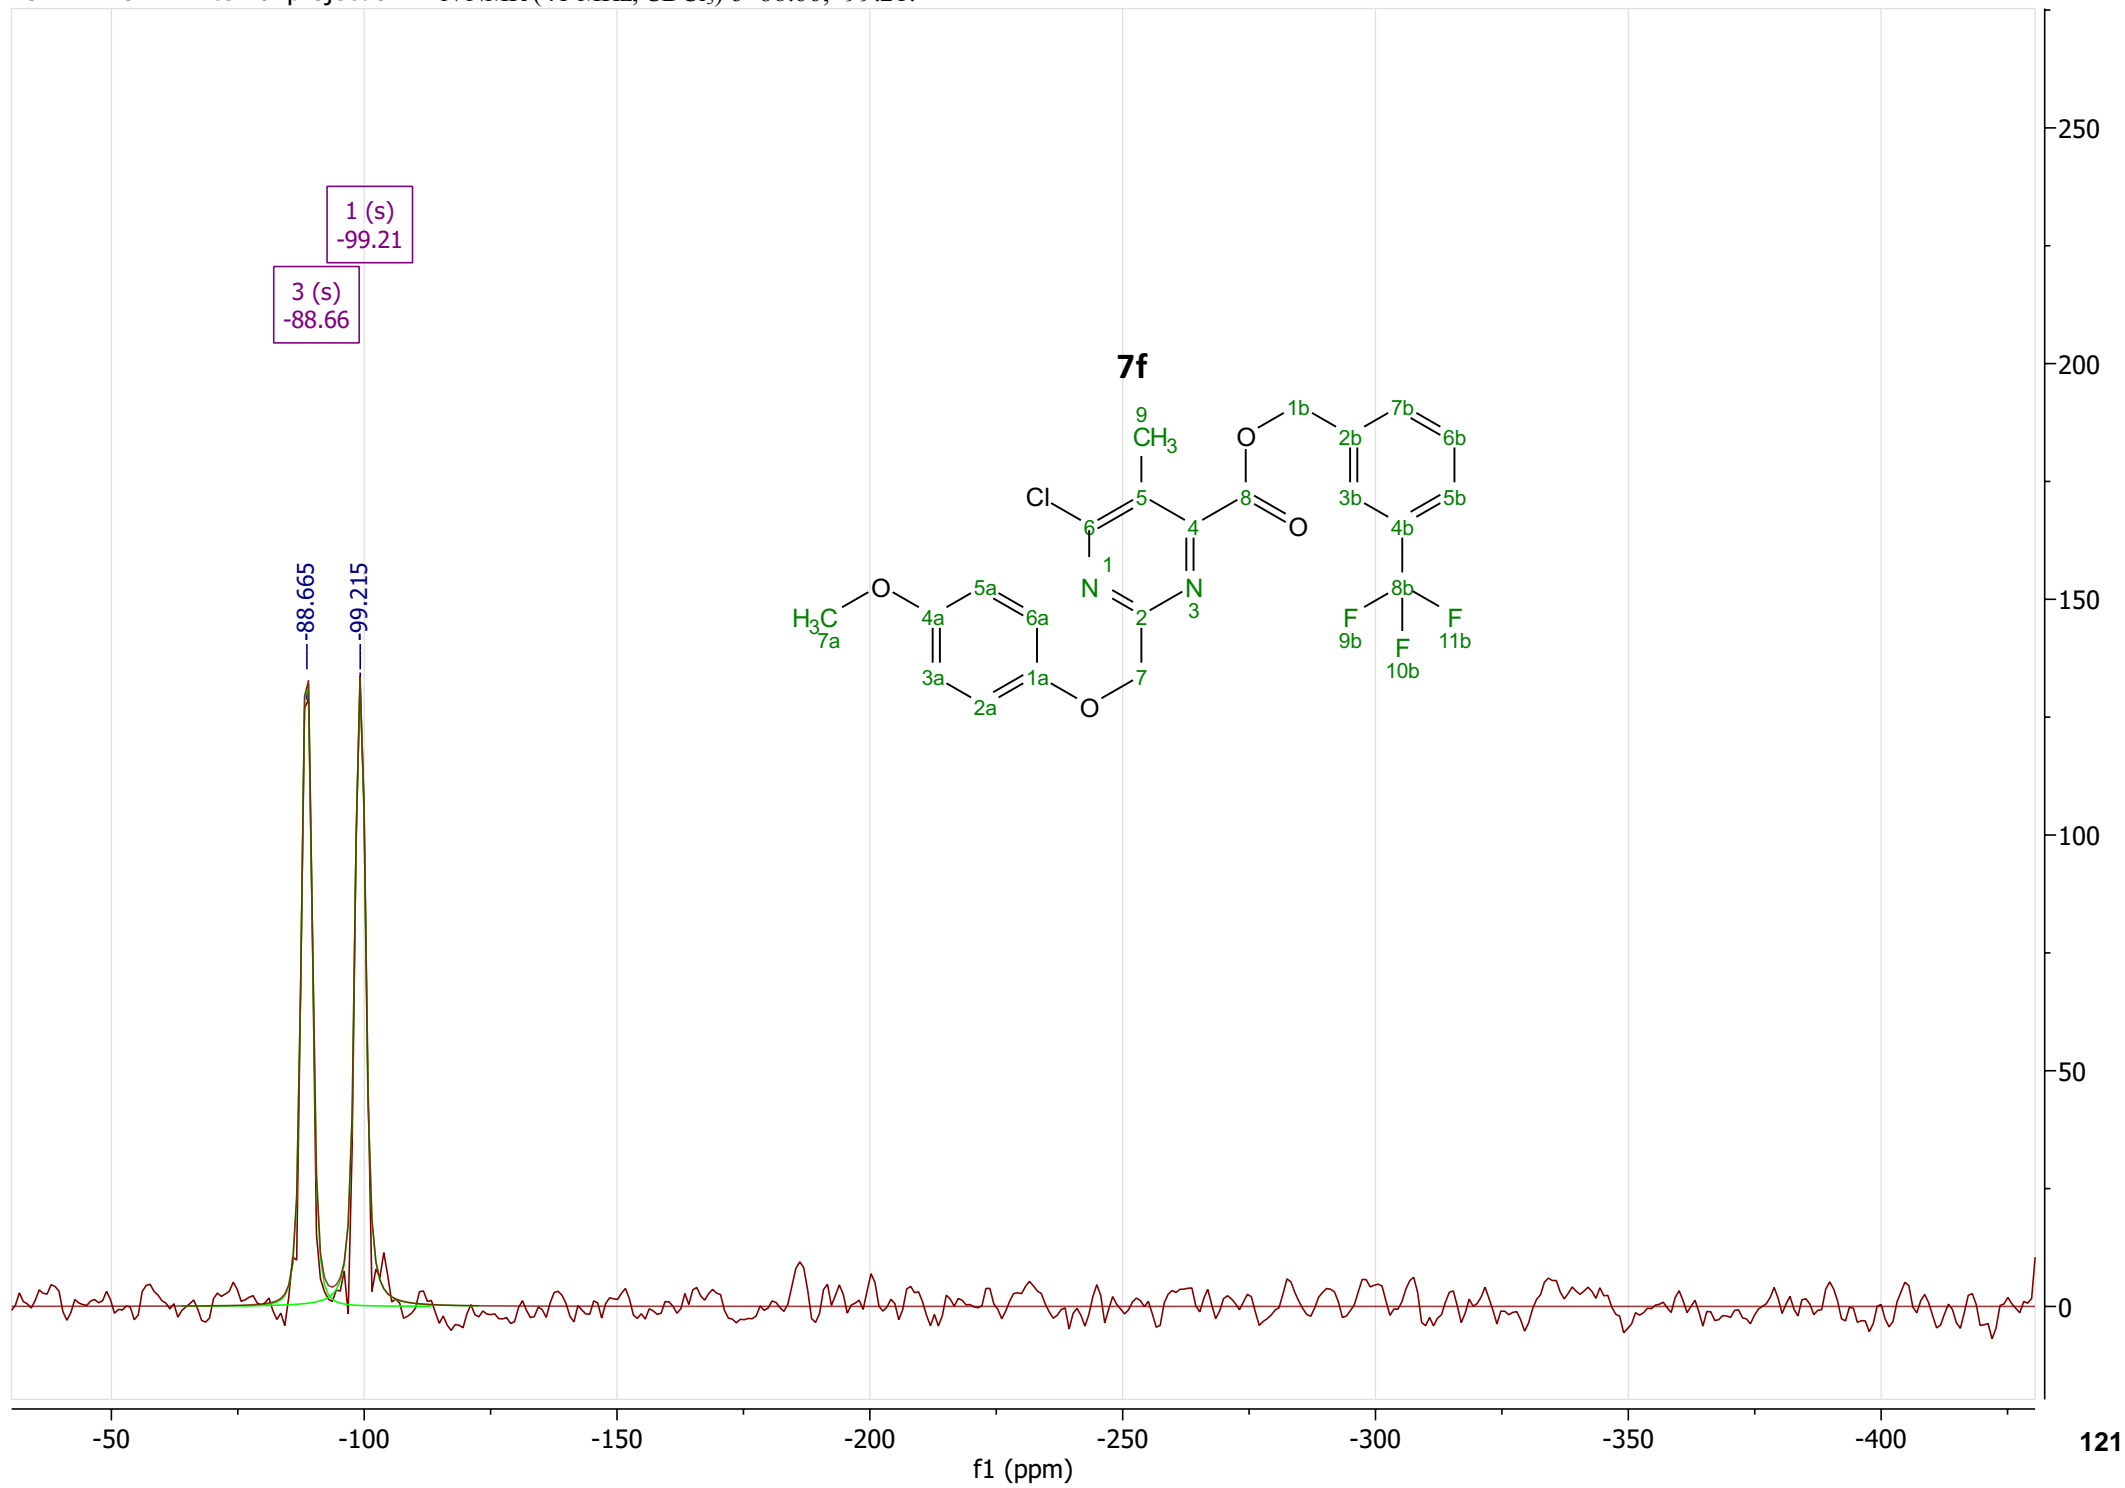

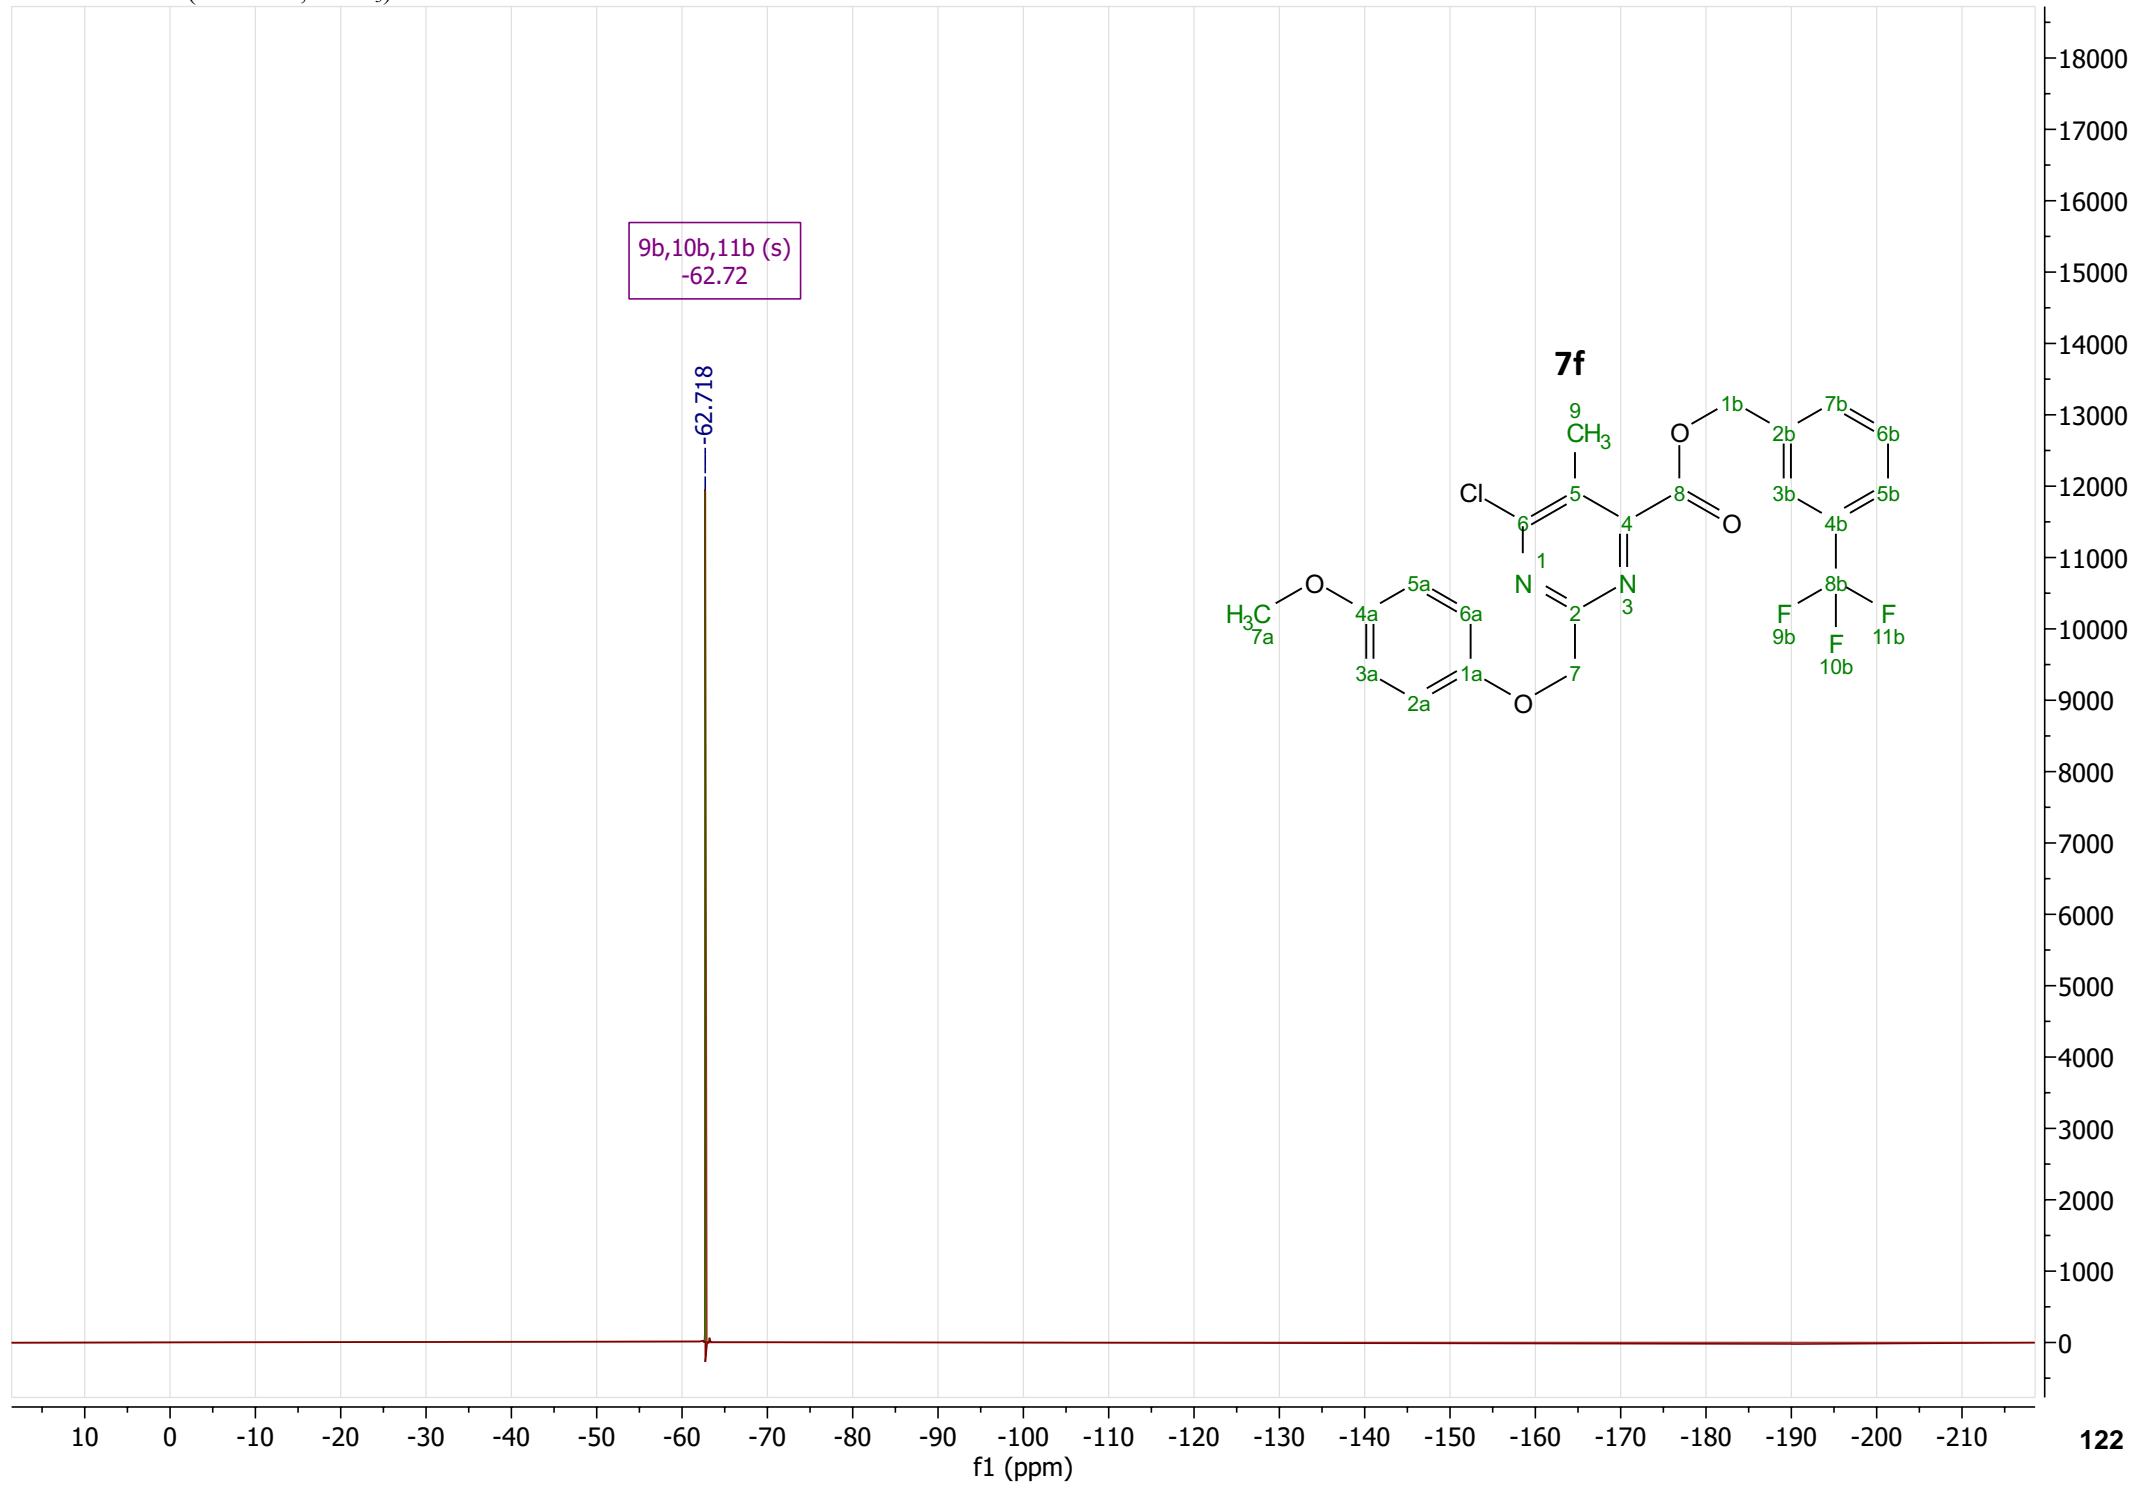

<sup>1</sup>H NMR (400 MHz, CDCl<sub>3</sub>) δ 7.02 – 6.86 (m, 2H), 6.86 – 6.71 (m, 2H), 5.20 (s, 2H), 4.41 (t, *J* = 6.9 Hz, 2H), 3.75 (s, 3H), 2.42 (s, 3H), 1.79 (quint, *J* = 6.9 Hz, 2H), 1.46 – 1.37 (m, 2H), 1.37 – 1.23 (m, 8H), 0.88 (t, *J* = 6.9 Hz, 3H).

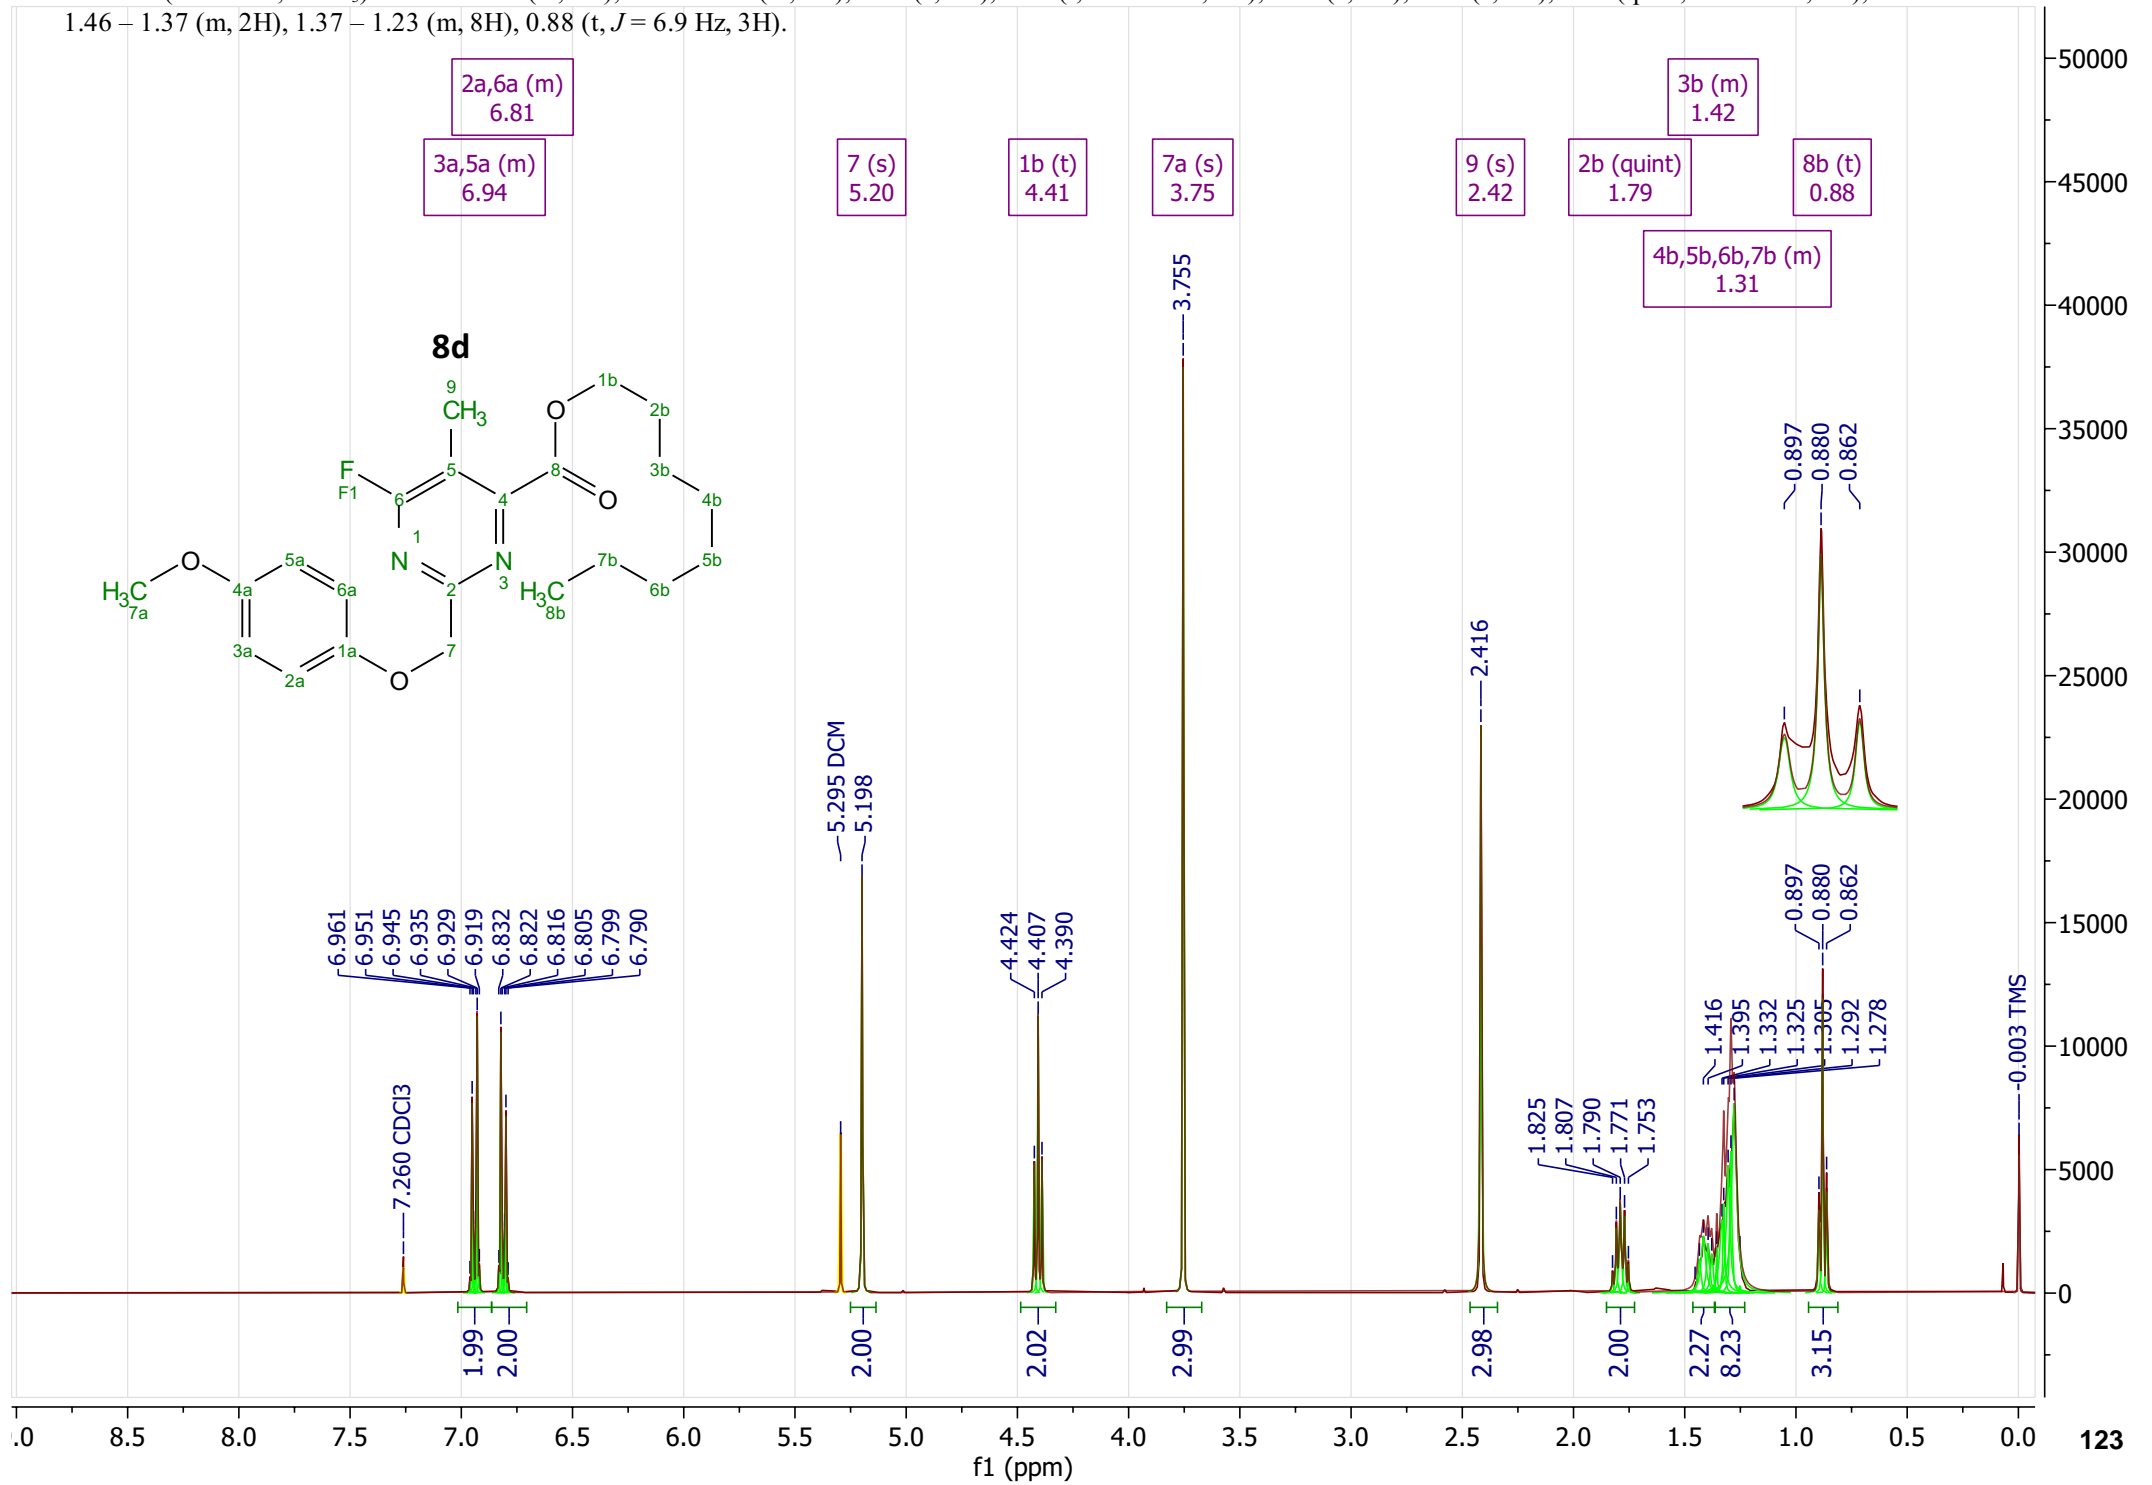

**13C** <sup>13</sup>C NMR (101 MHz, CDCl<sub>3</sub>) δ 169.9 (d, *J* = 255.4 Hz), 164.6 (d, *J* = 13.5 Hz), 164.4 (d, *J* = 5.9 Hz), 159.4 (d, *J* = 5.8 Hz), 154.5, 152.5, 116.4 (d, *J* = 27.4 Hz), 116.3, 114.7, 70.8, 66.9, 55.8, 31.9, 29.28, 29.29, 28.6, 26.0, 22.8, 14.2, 10.5.

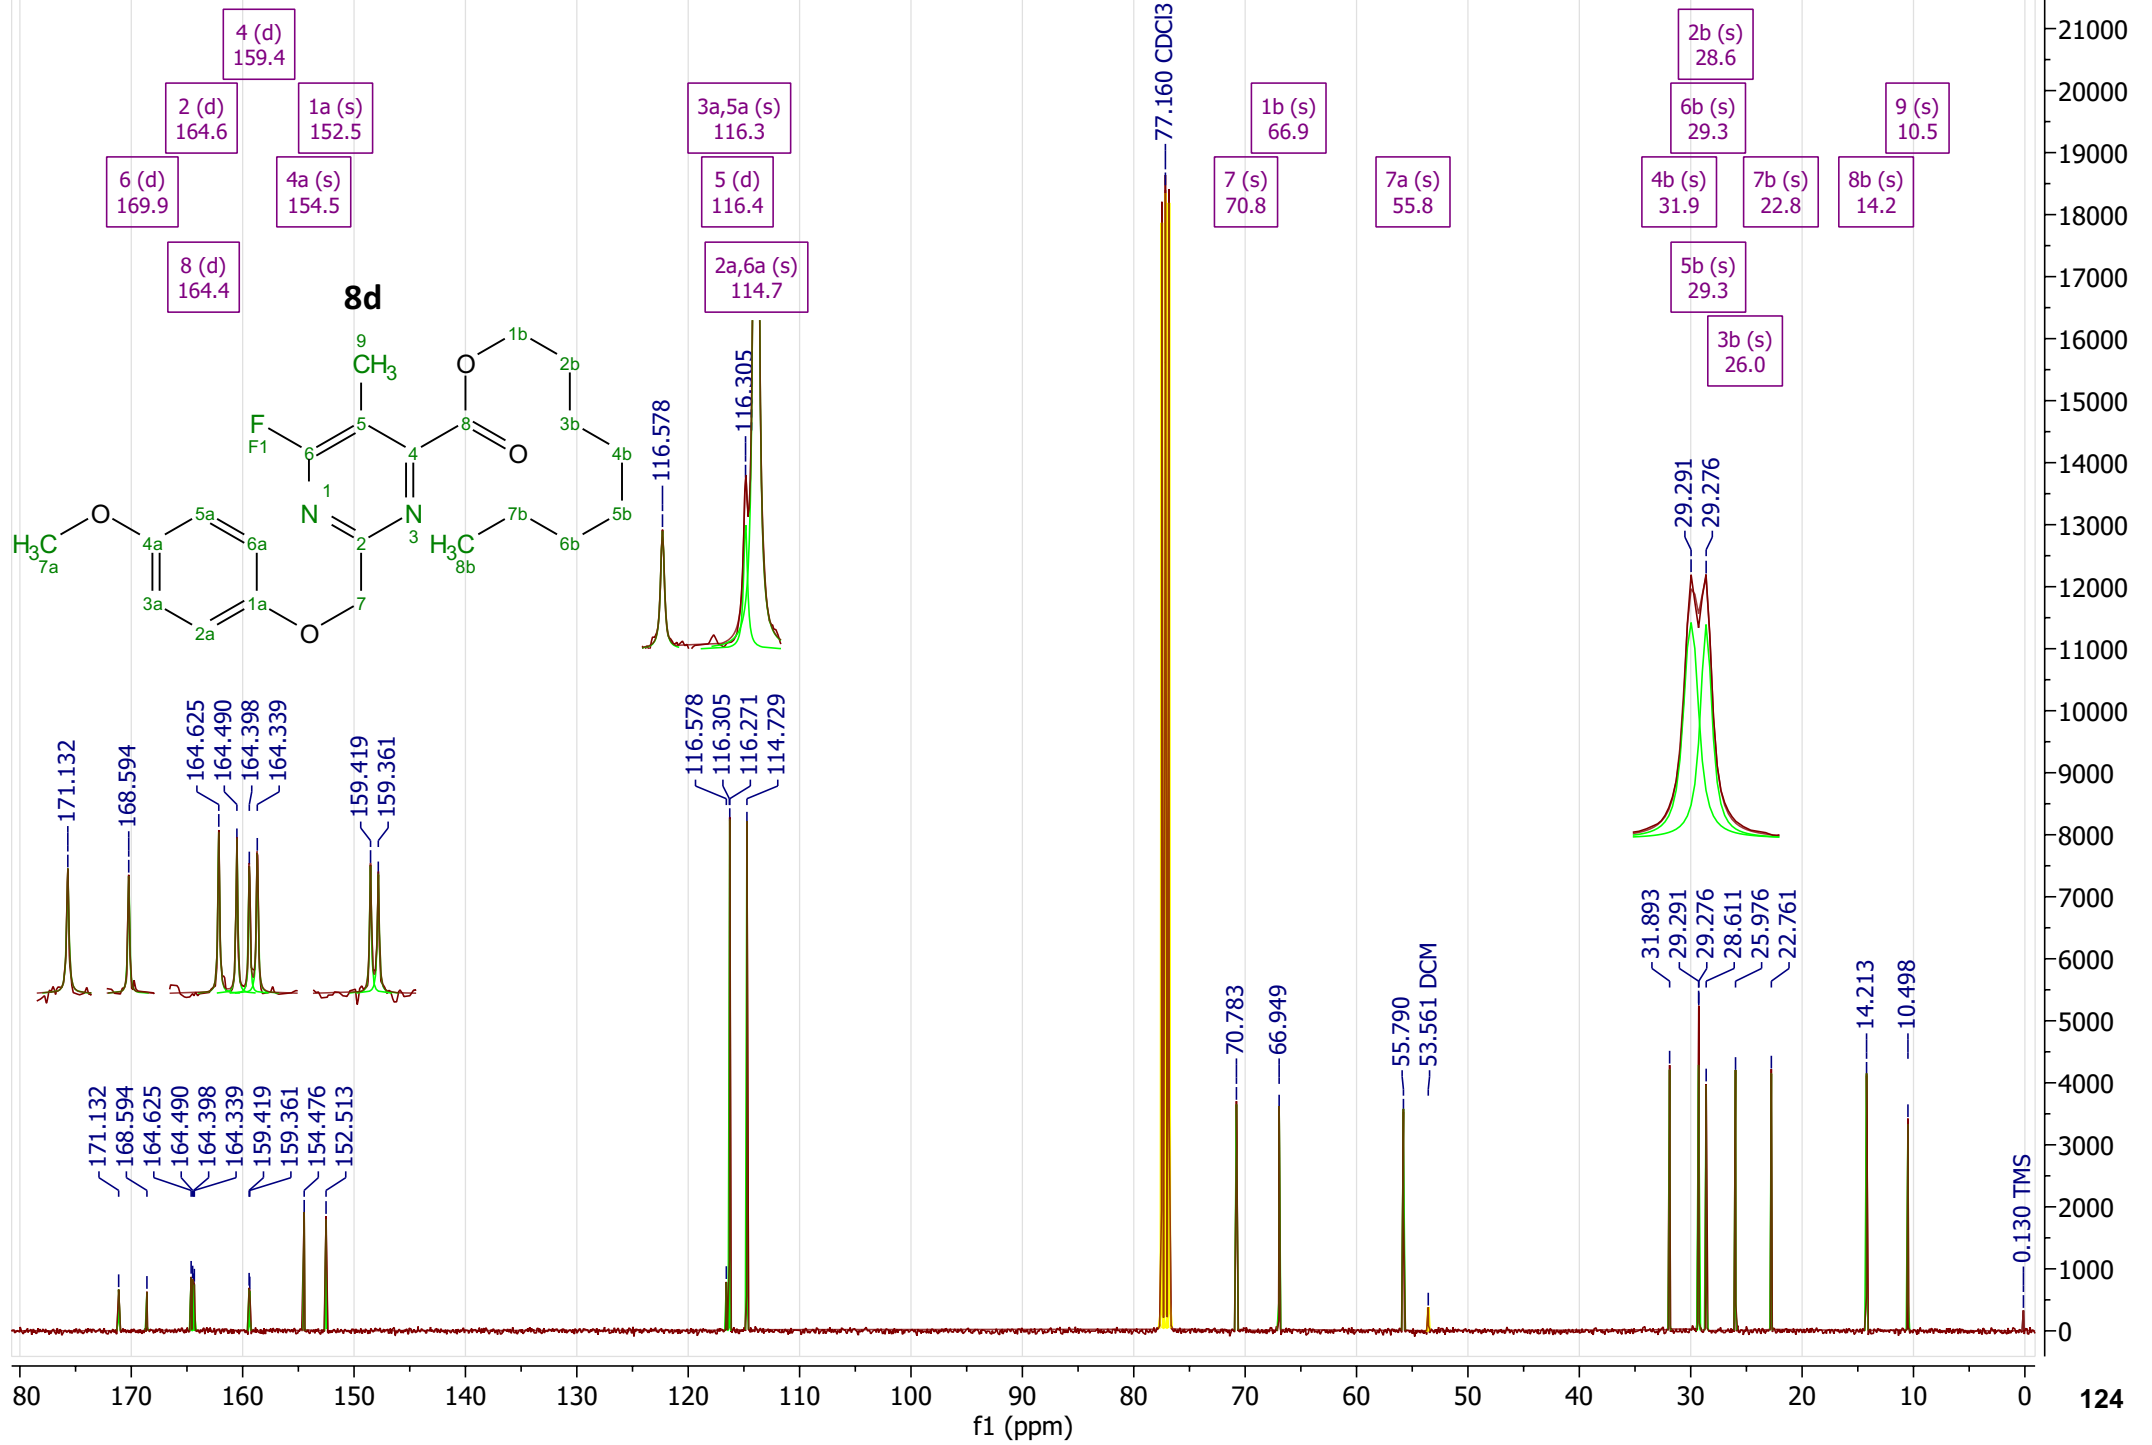

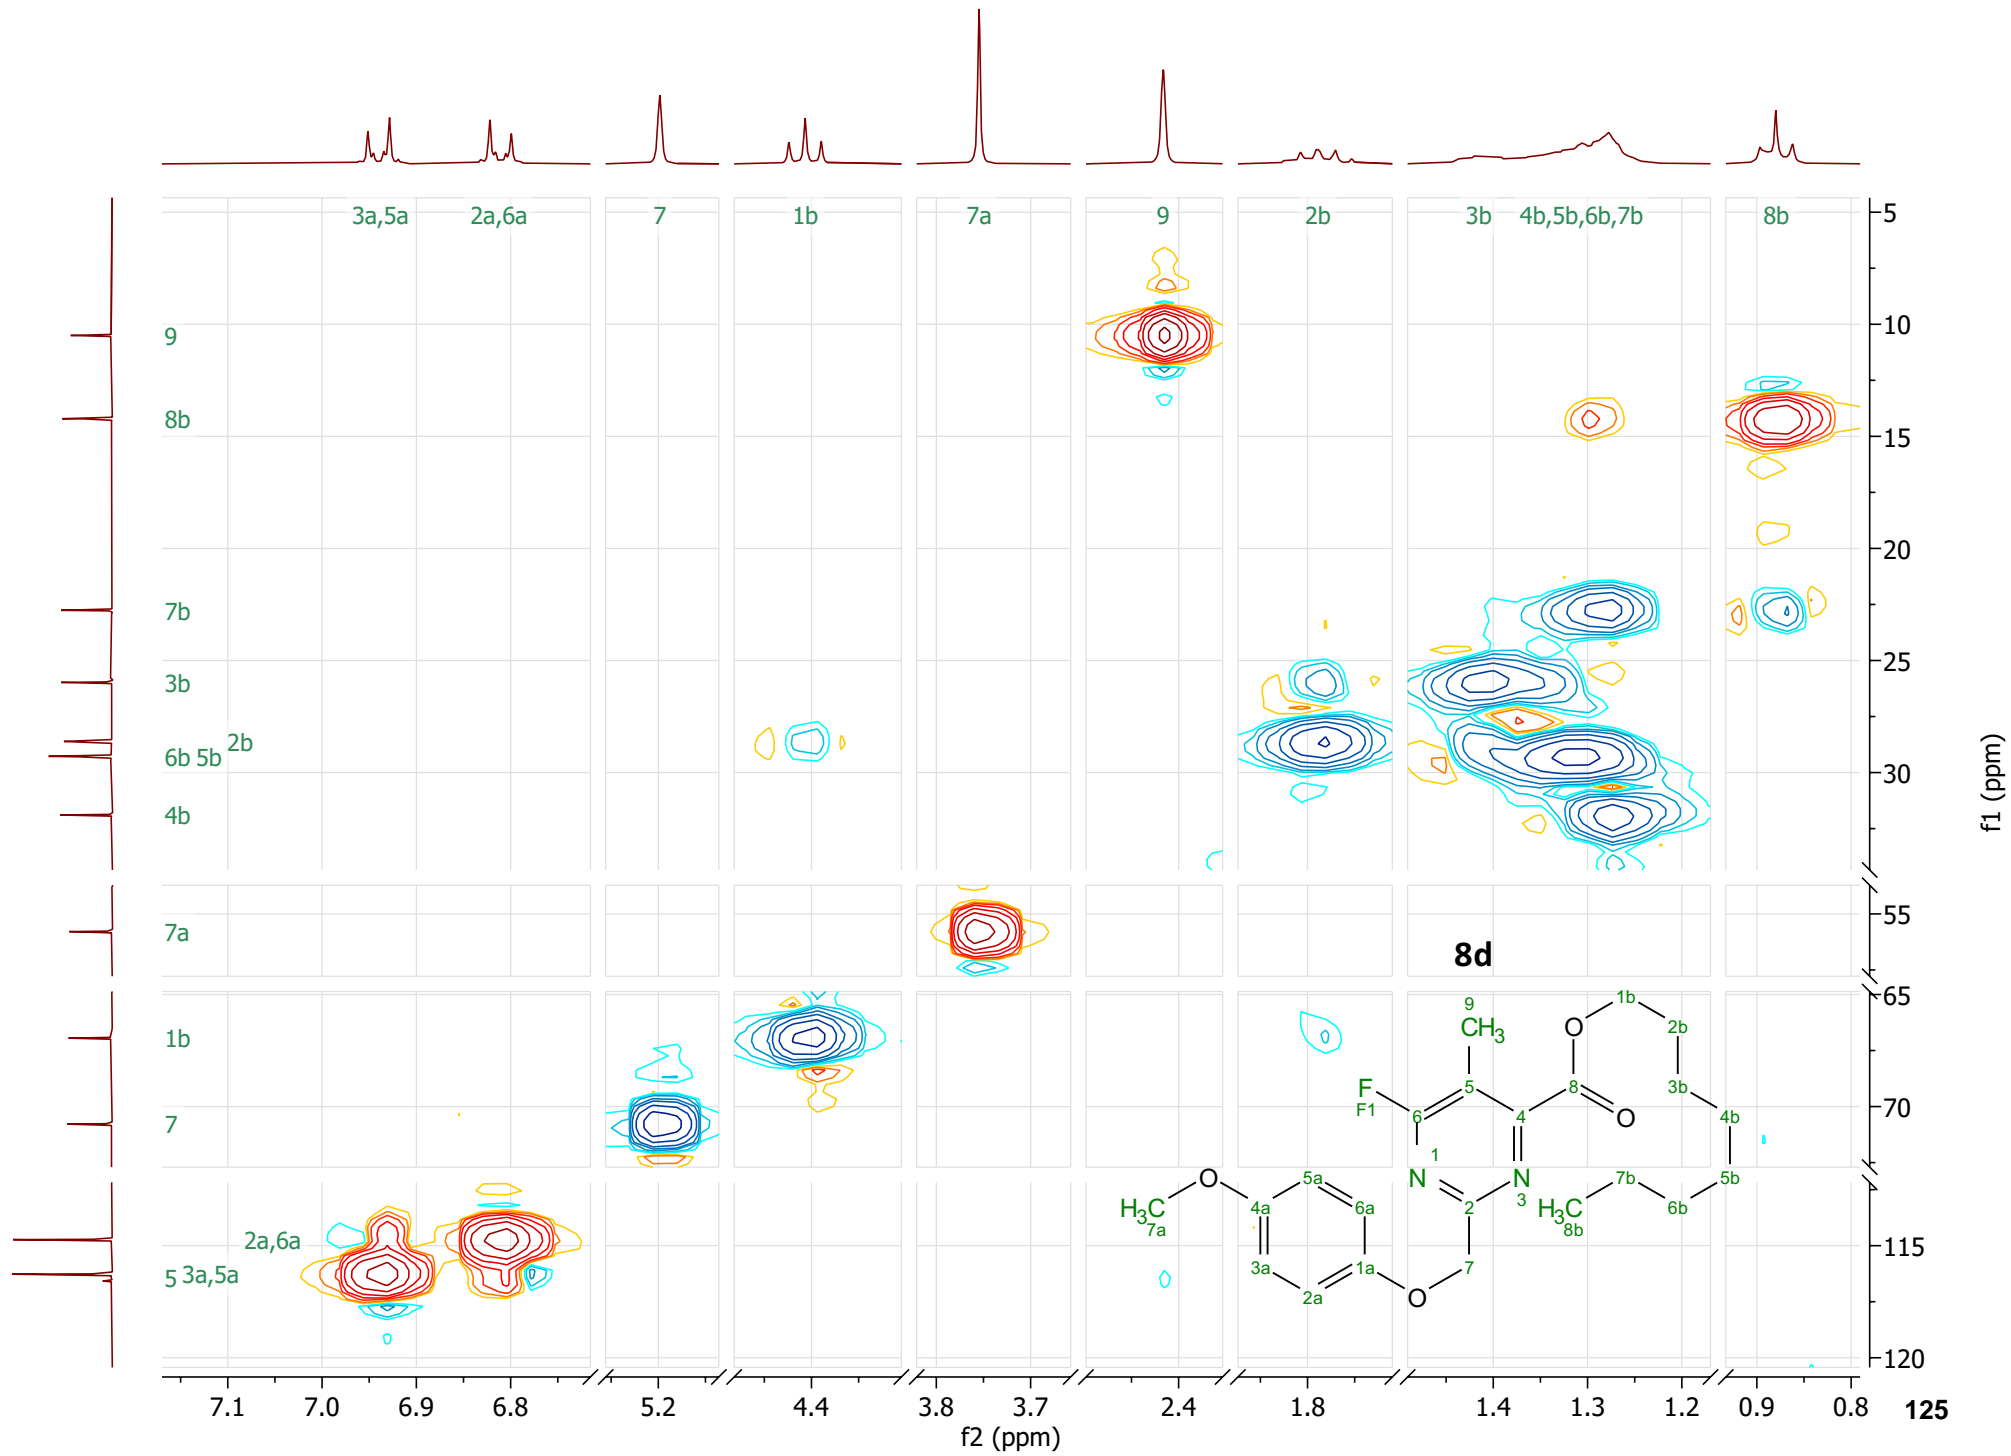

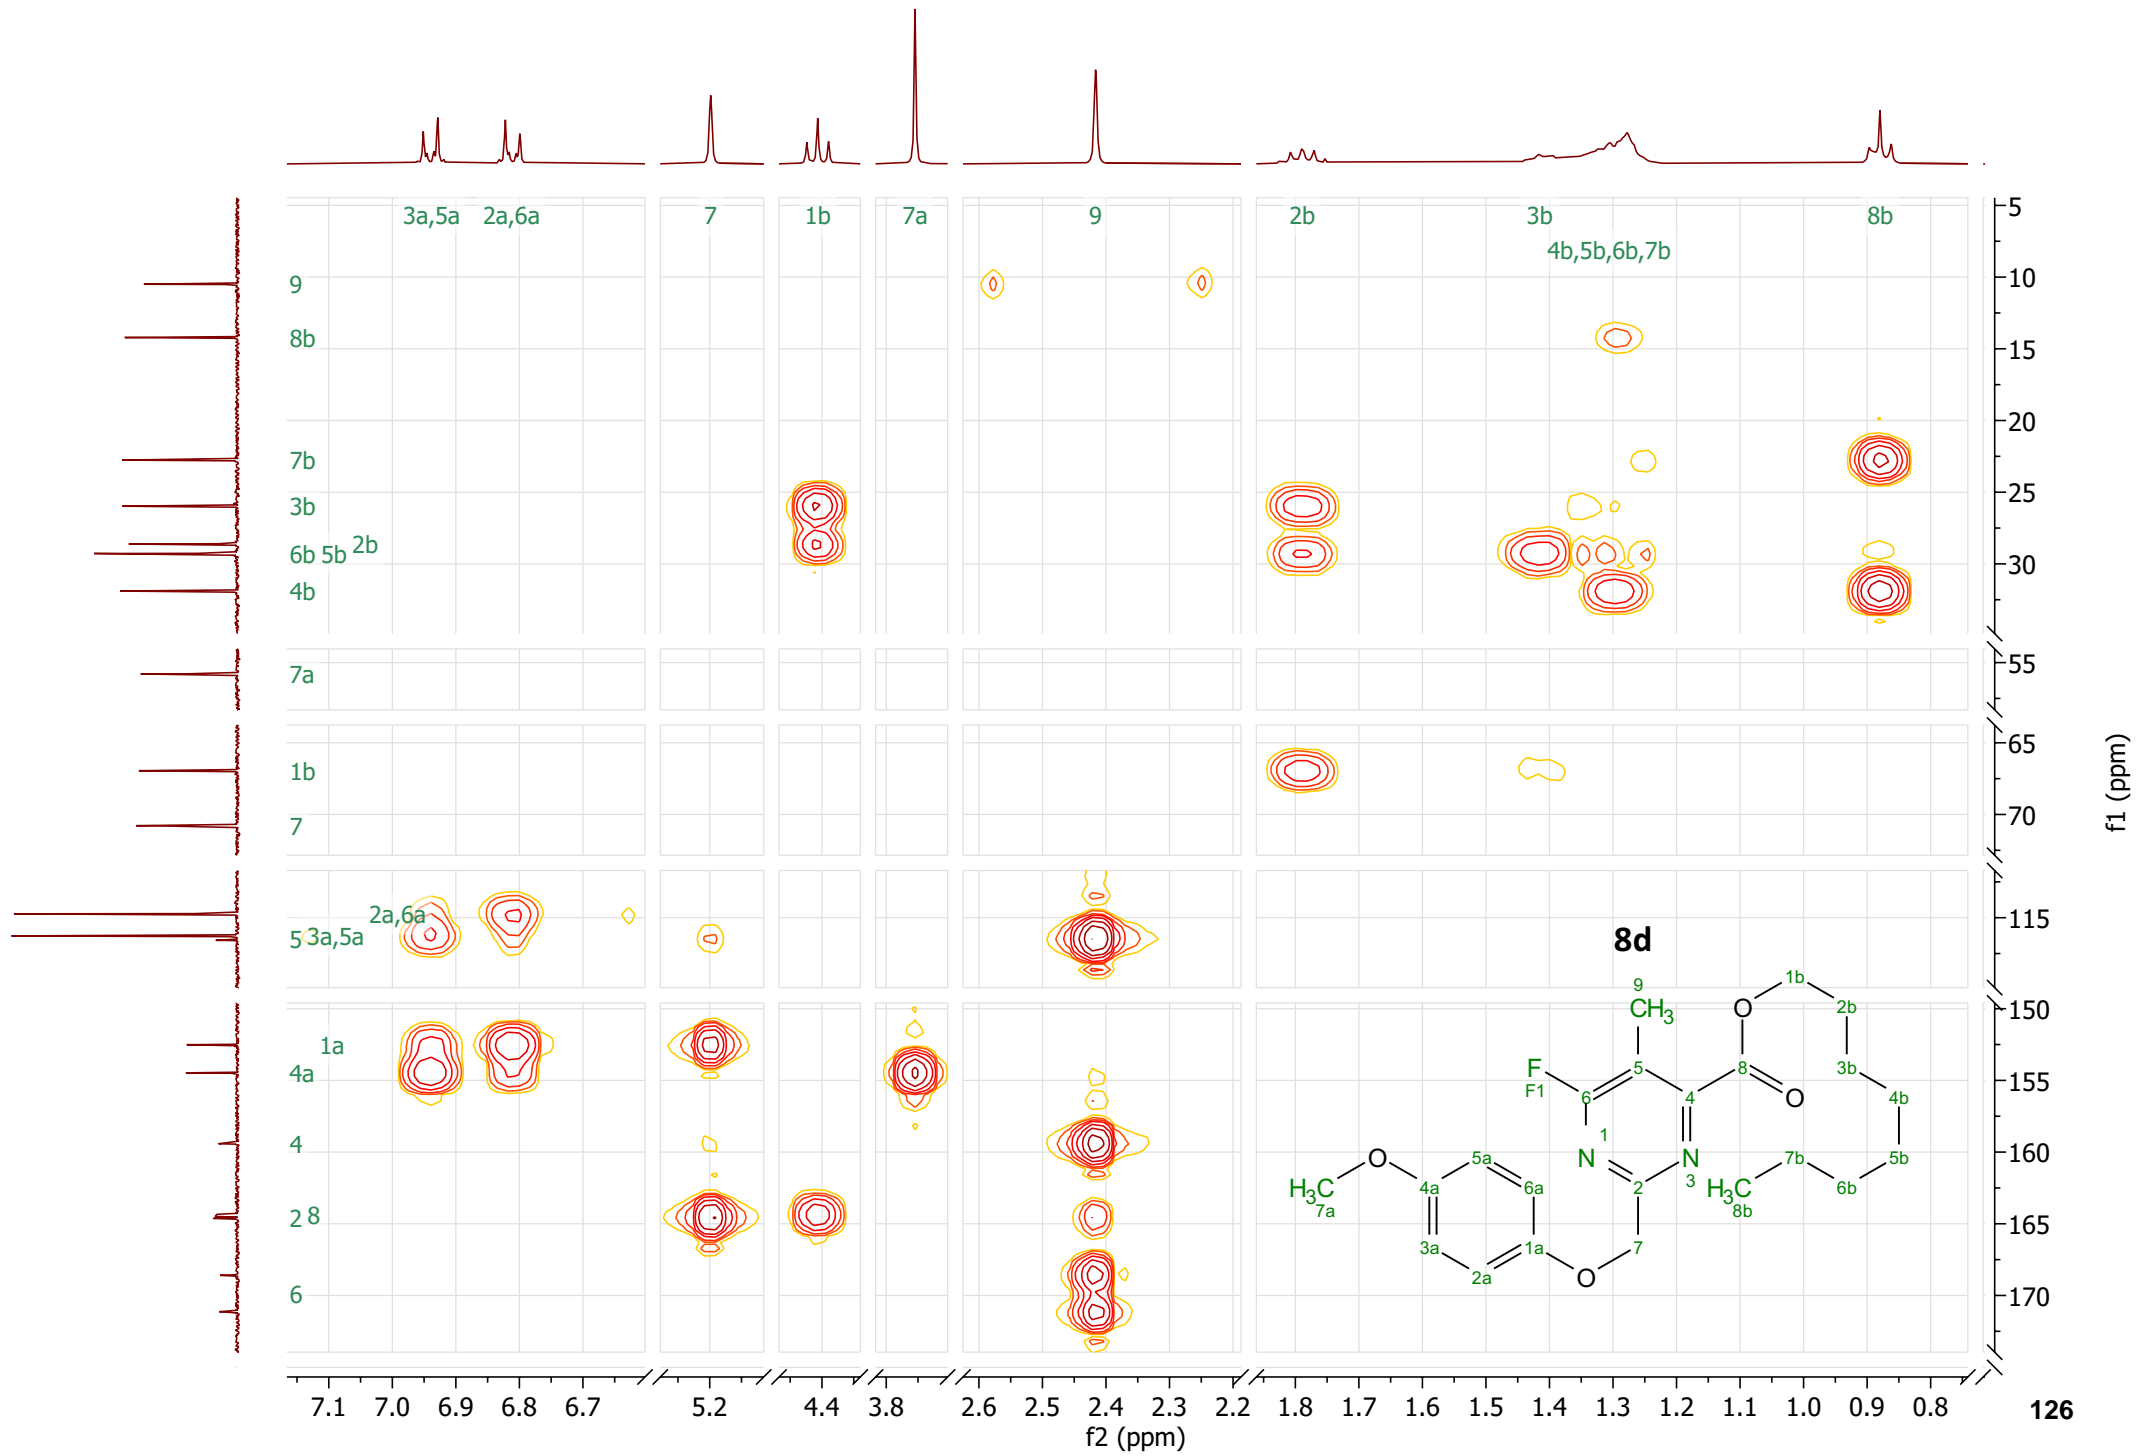

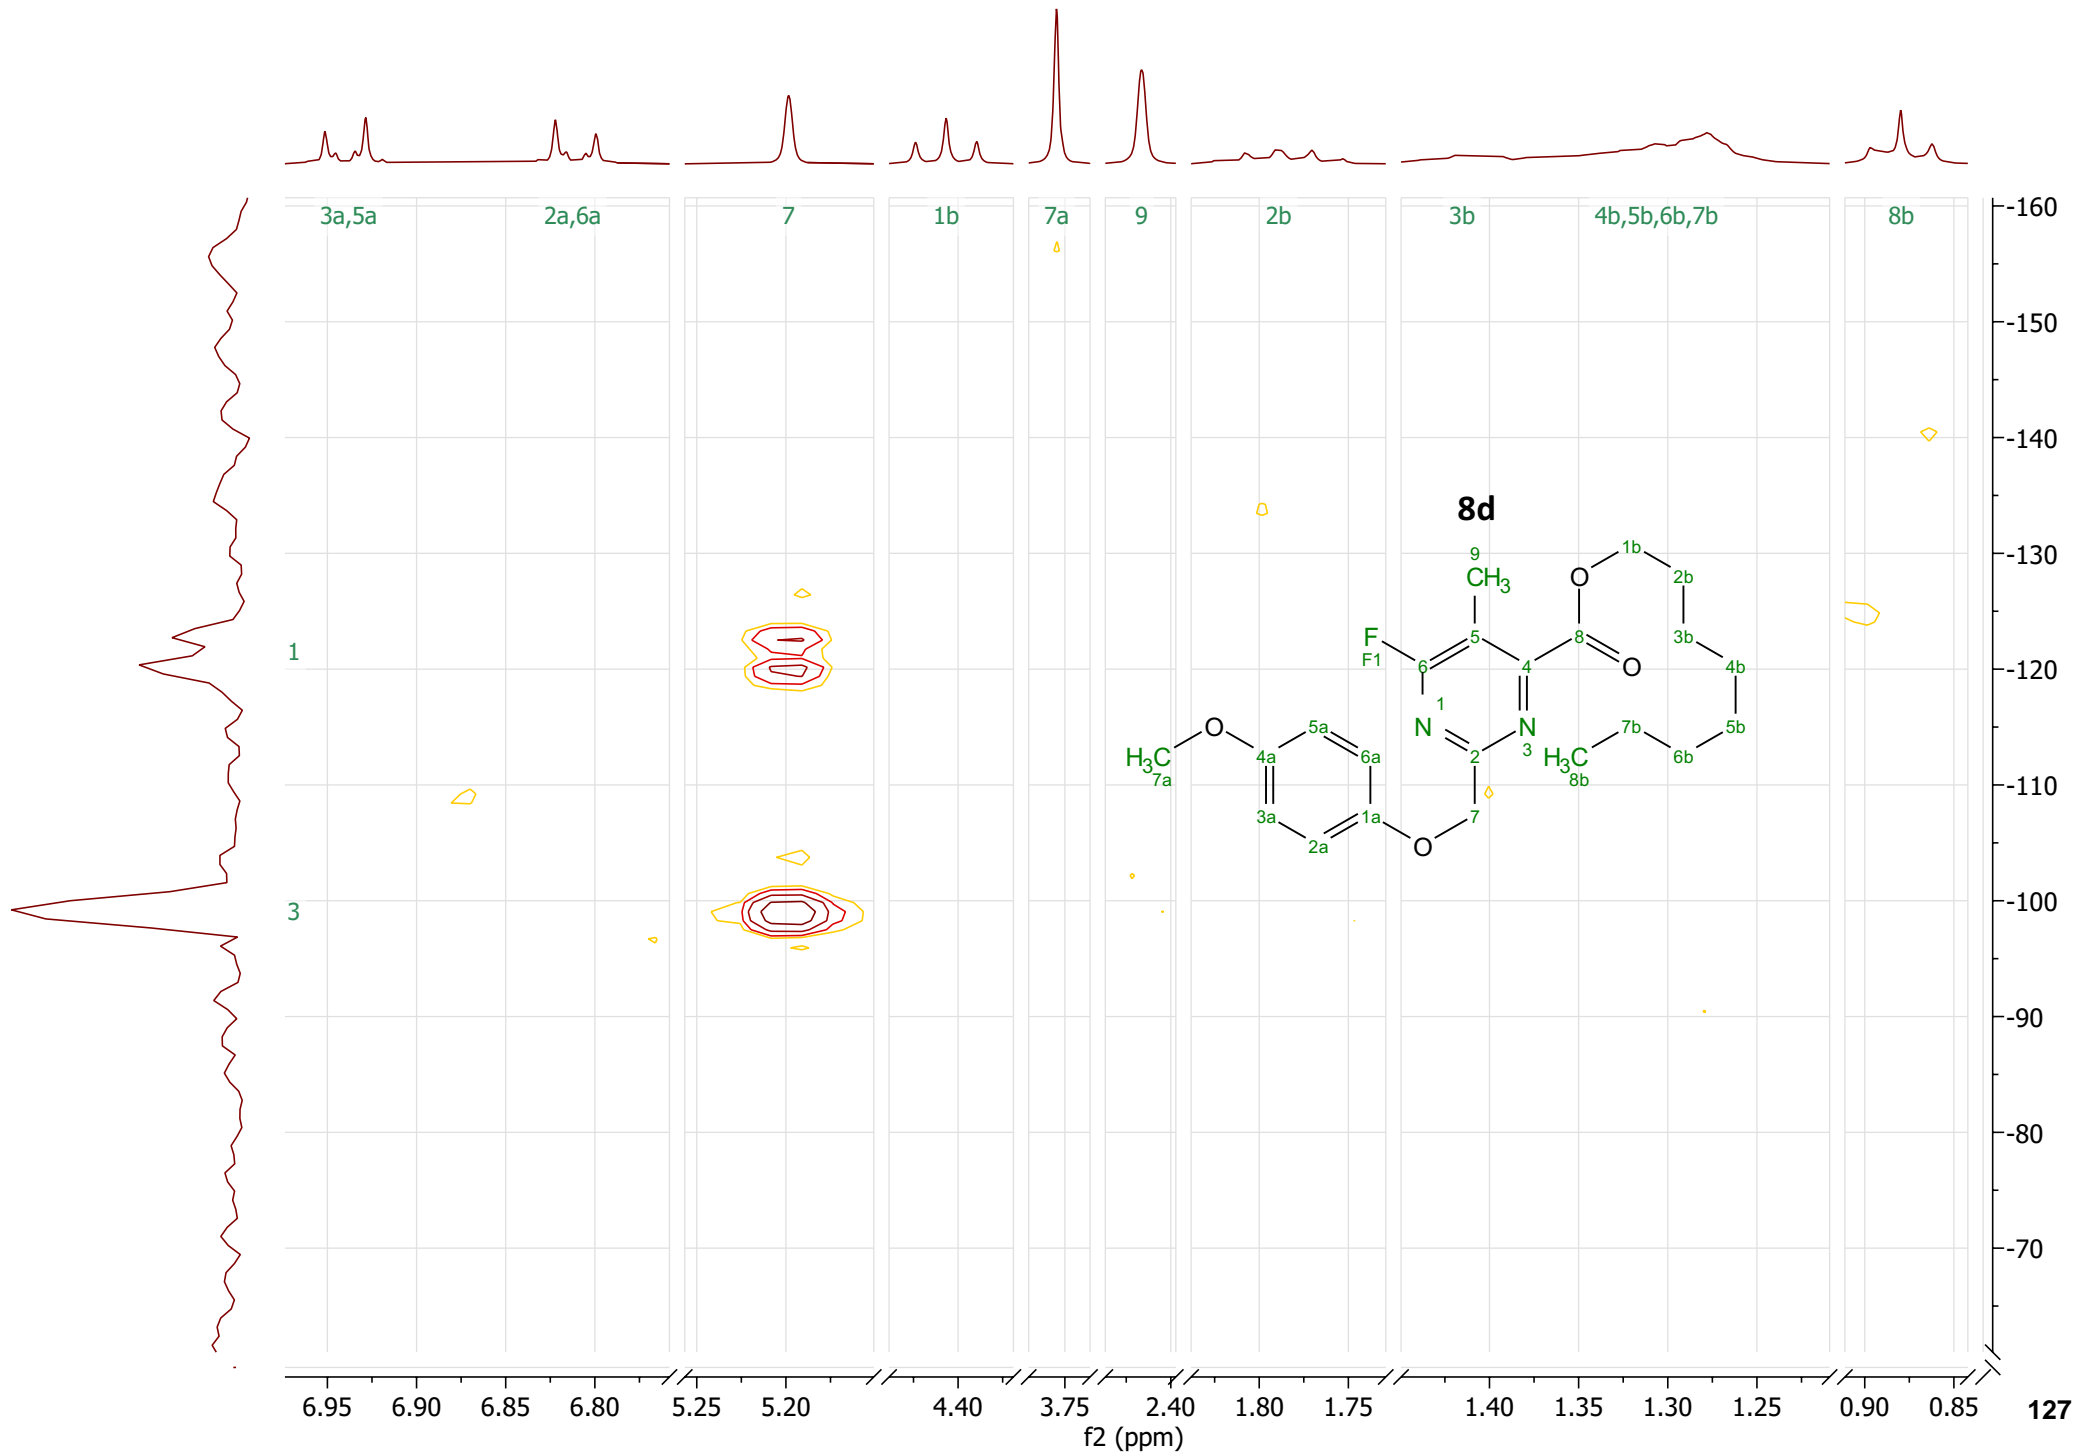





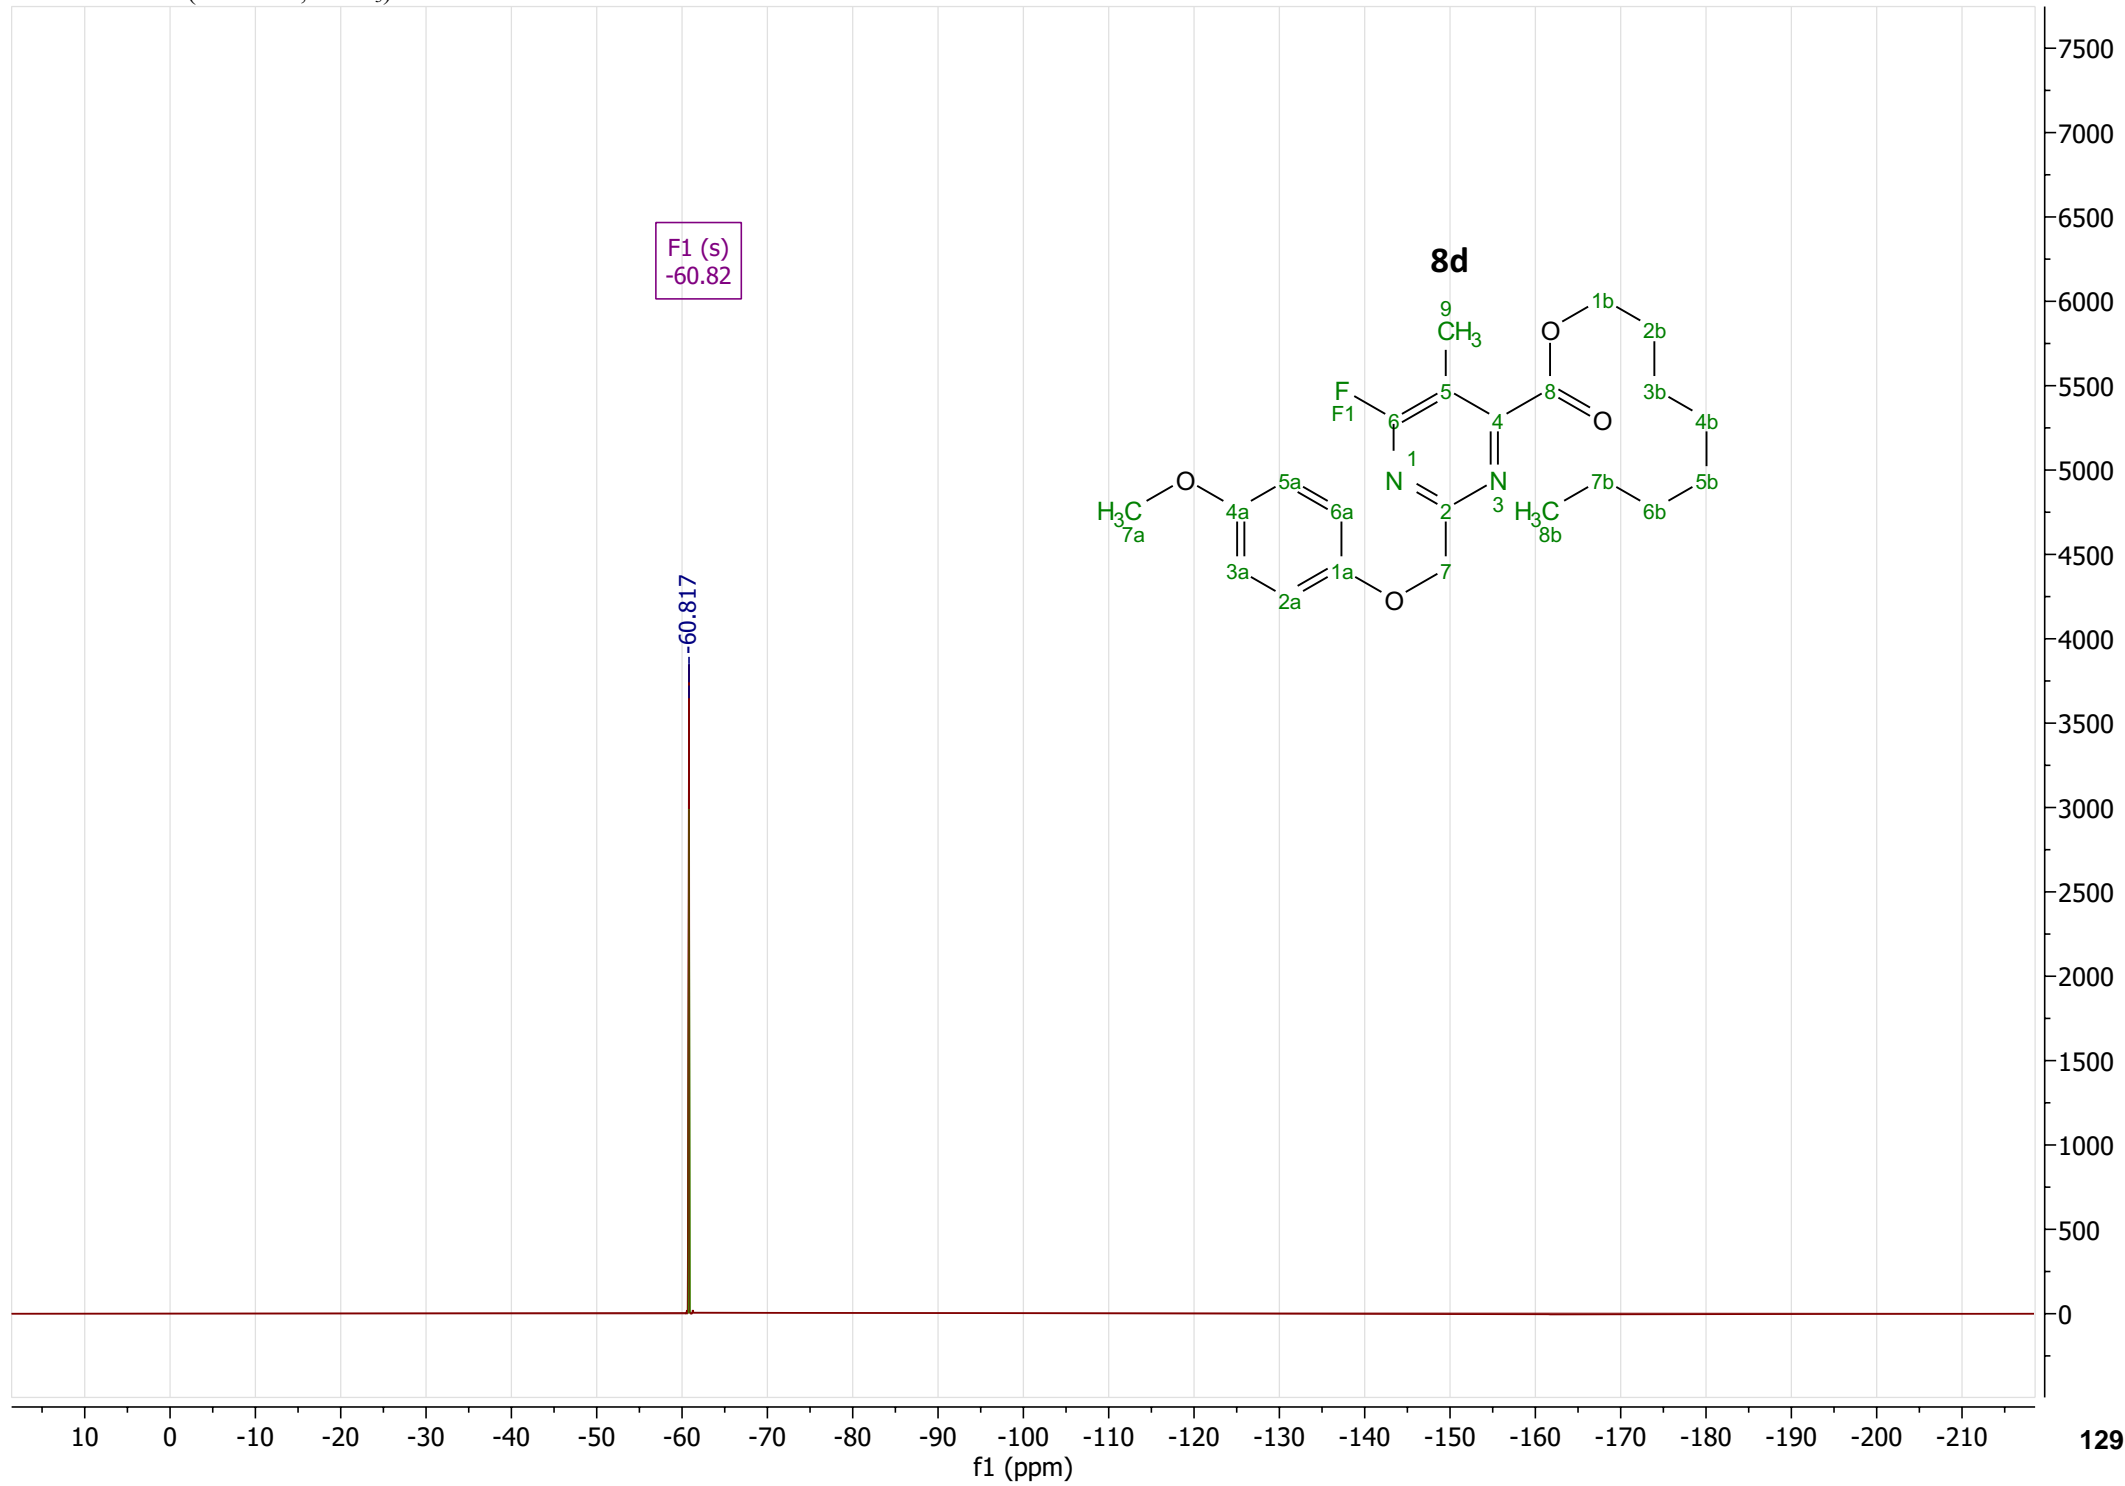

$^1\text{H}$  NMR (400 MHz,  $\text{CDCl}_3$ )  $\delta$  4.82 (br s, 3H), 4.46 (q,  $J = 7.2$  Hz, 3H), 3.33 (br s, 1H), 2.49 (app t,  $J = 0.8$  Hz, 4H), 1.41 (t,  $J = 7.2$  Hz, 4H).

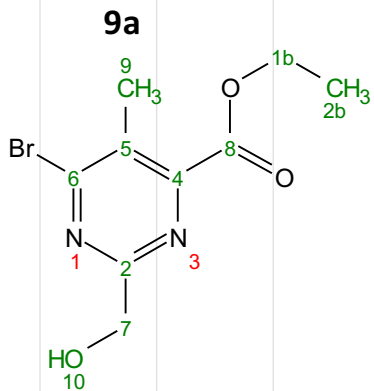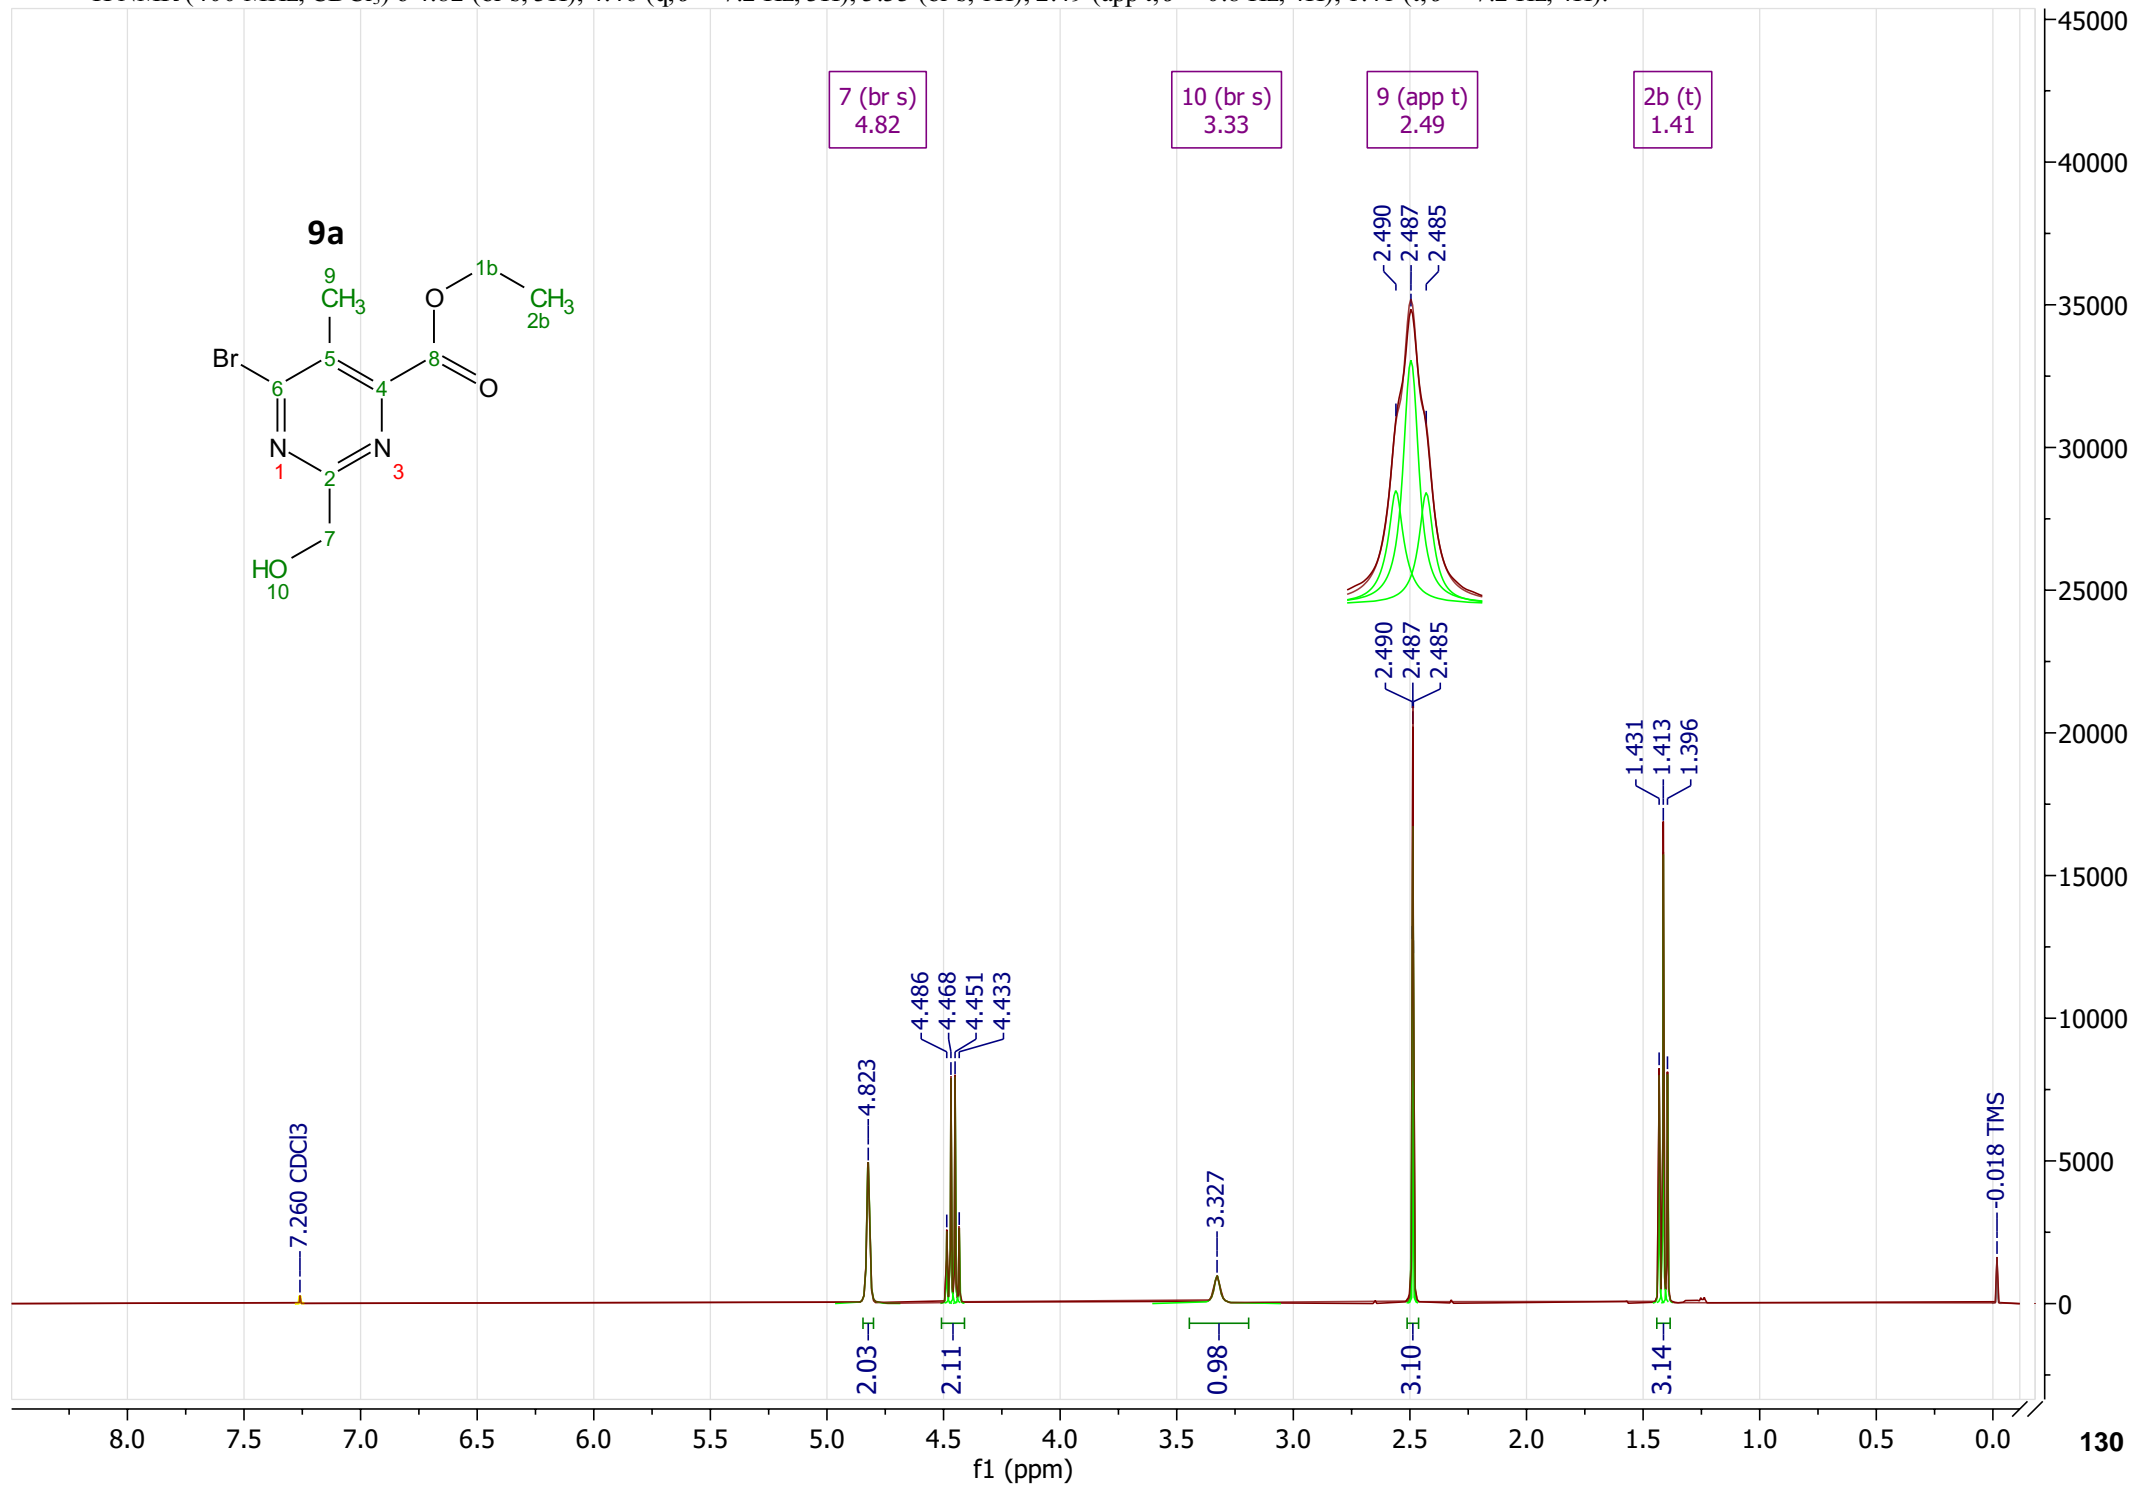

$^{13}\text{C}$  NMR (101 MHz,  $\text{CDCl}_3$ )  $\delta$  166.5, 164.5, 158.0, 156.4, 129.6, 64.1, 62.9, 17.7, 14.2.

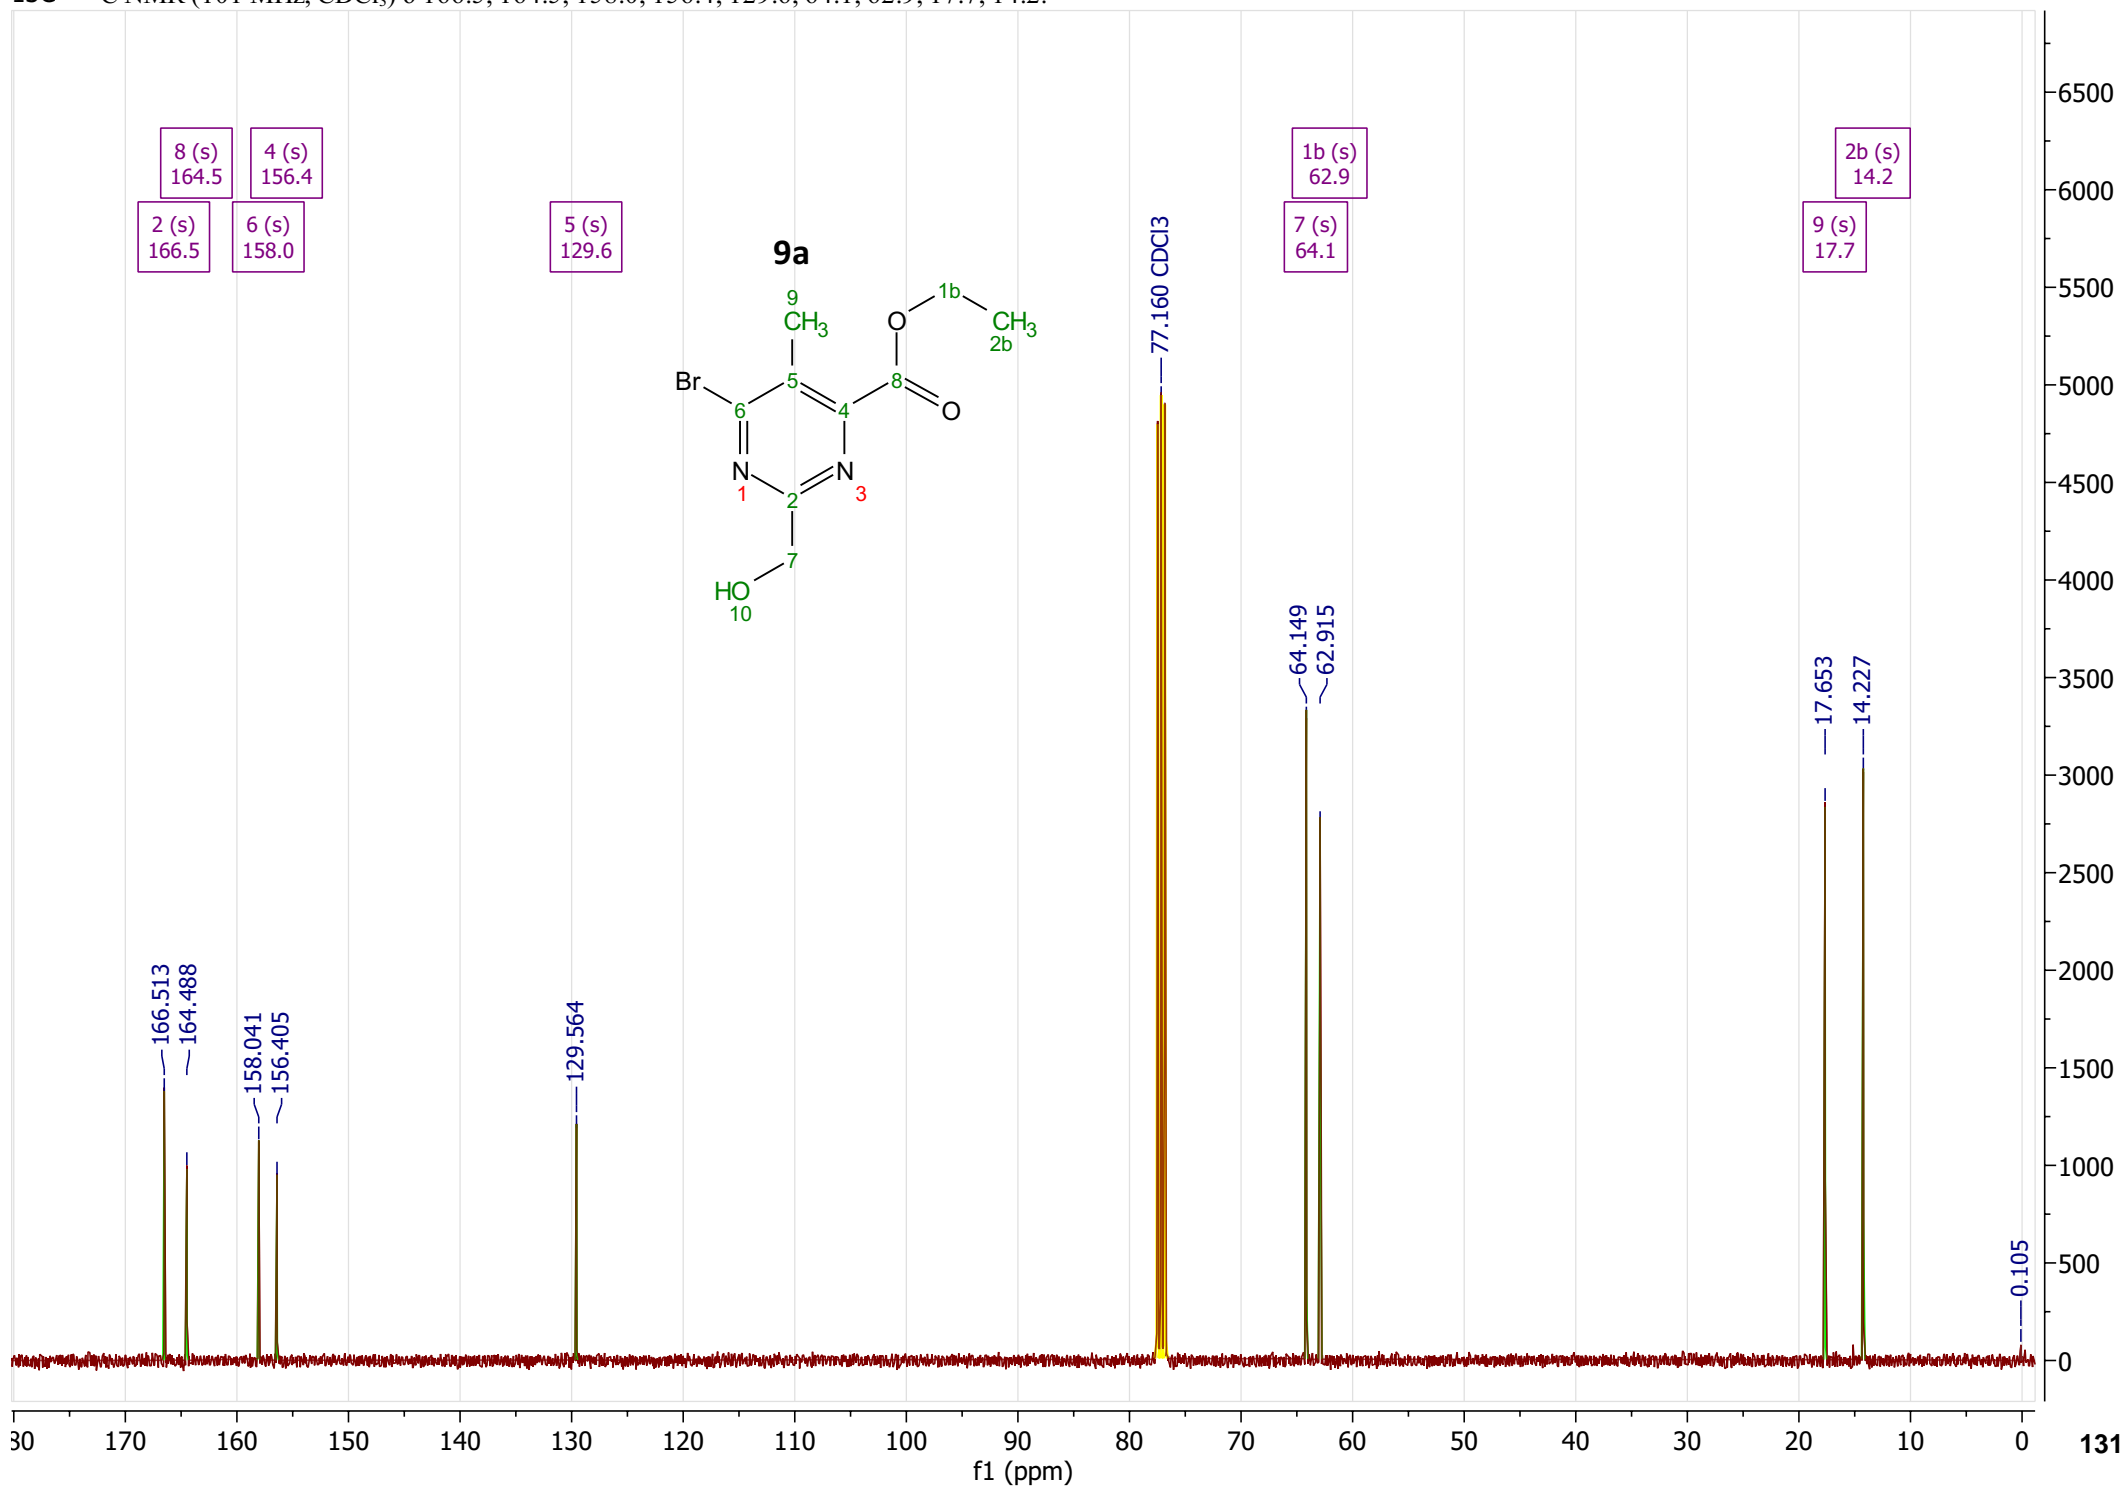

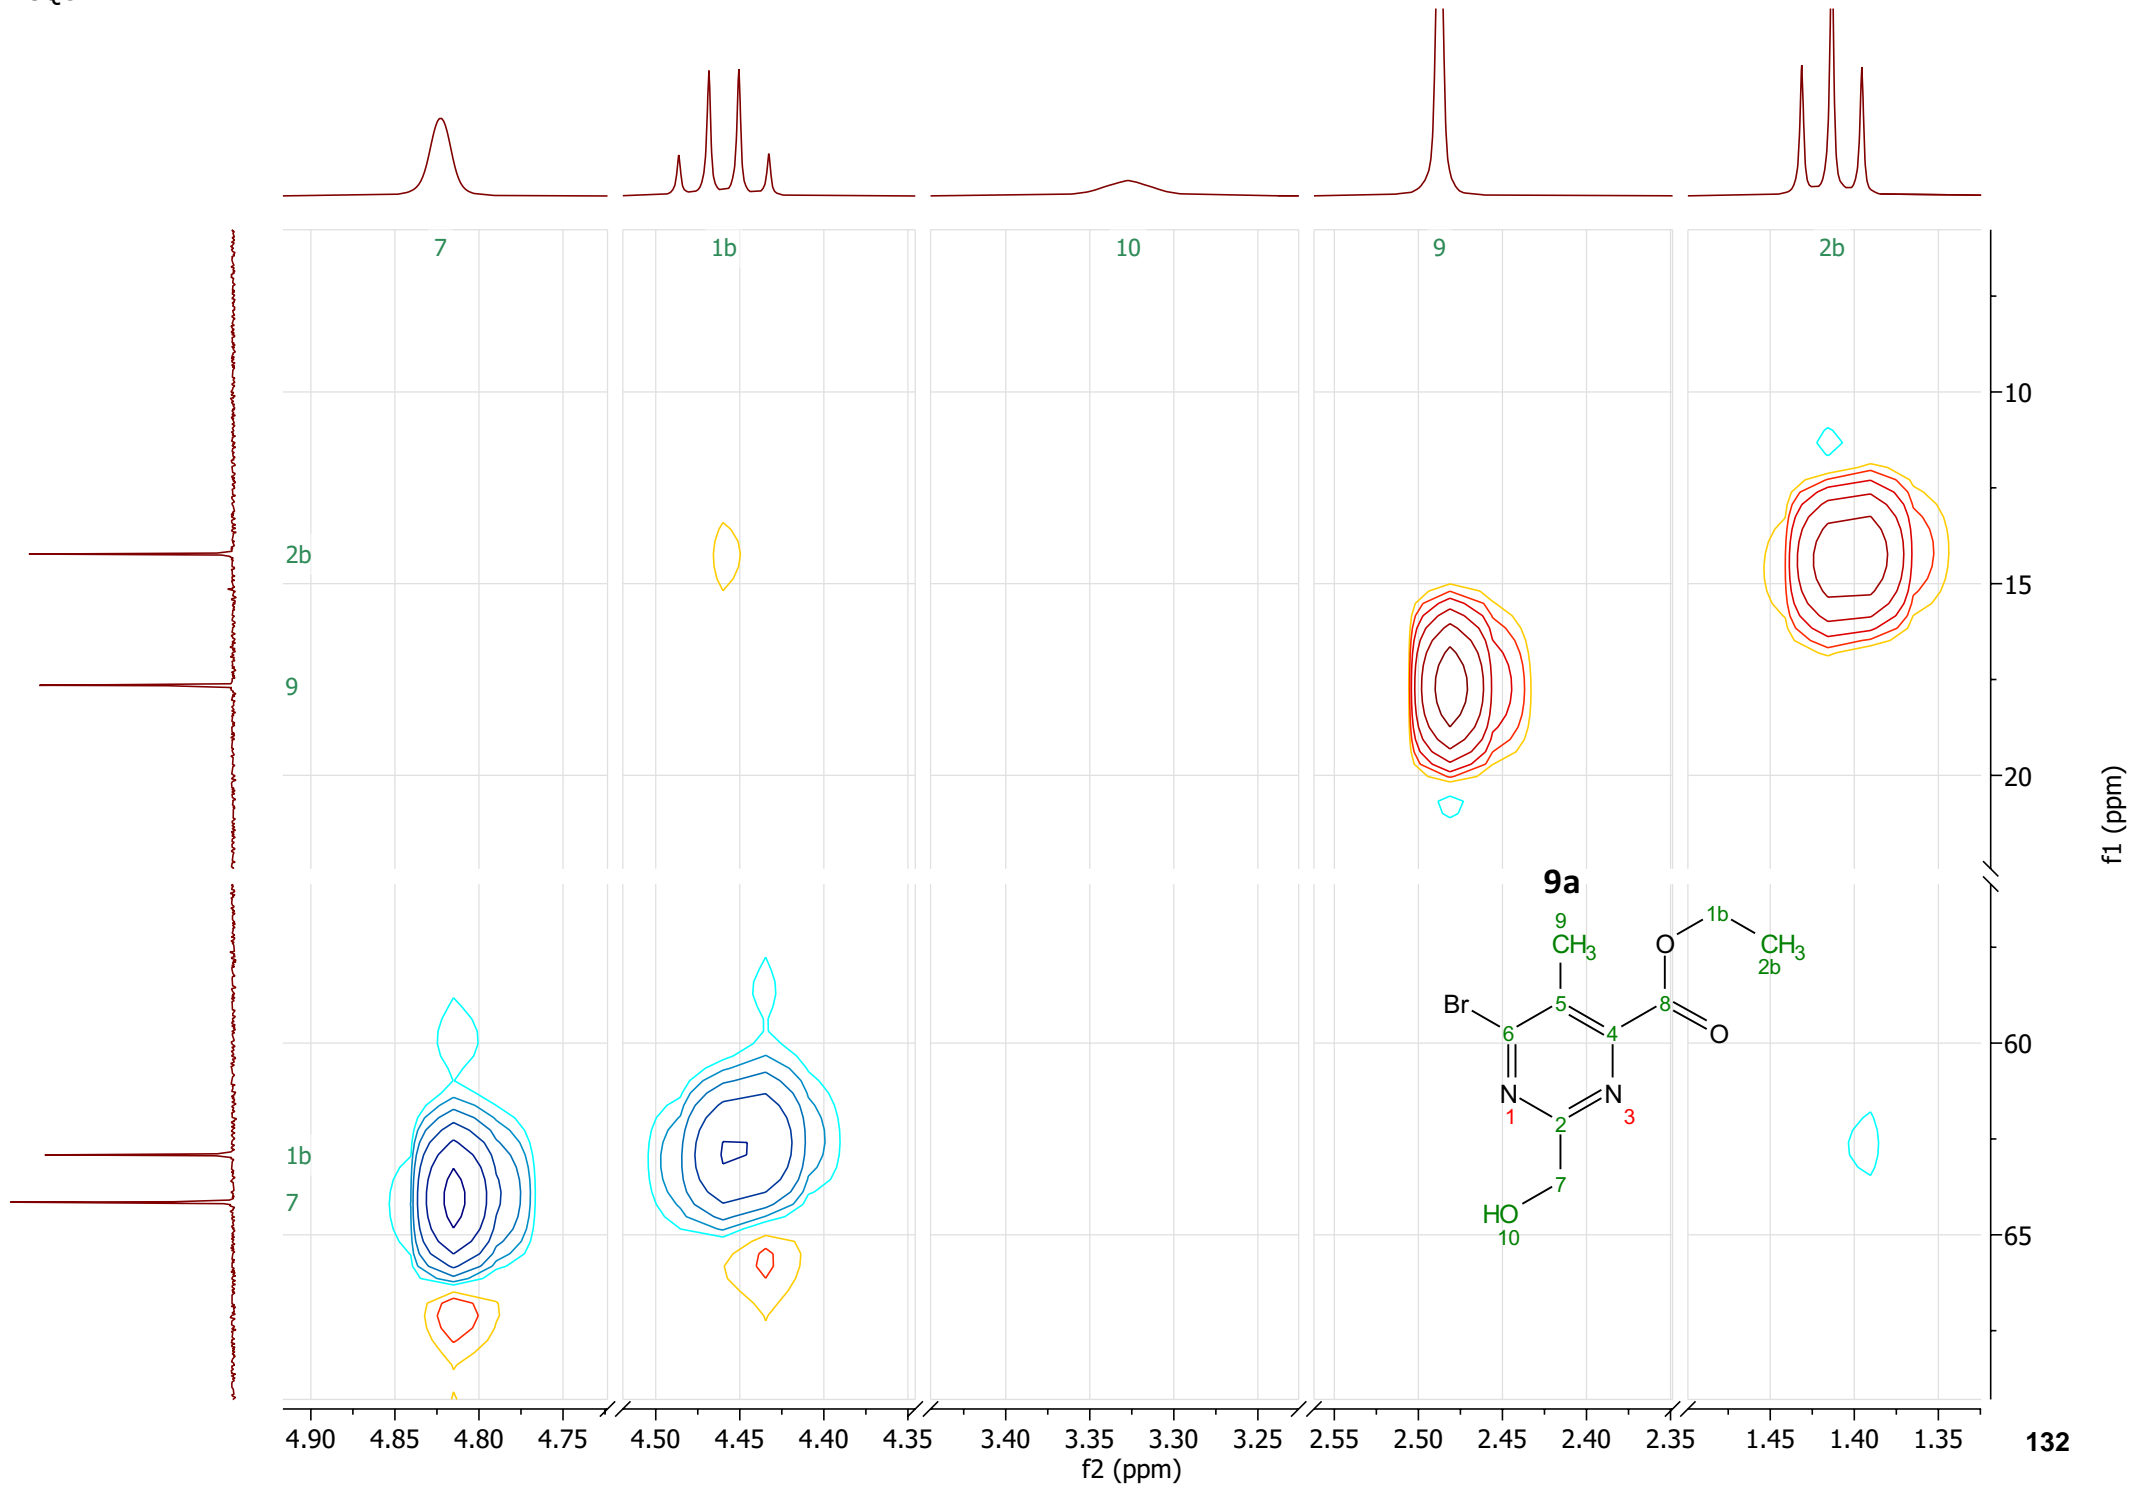

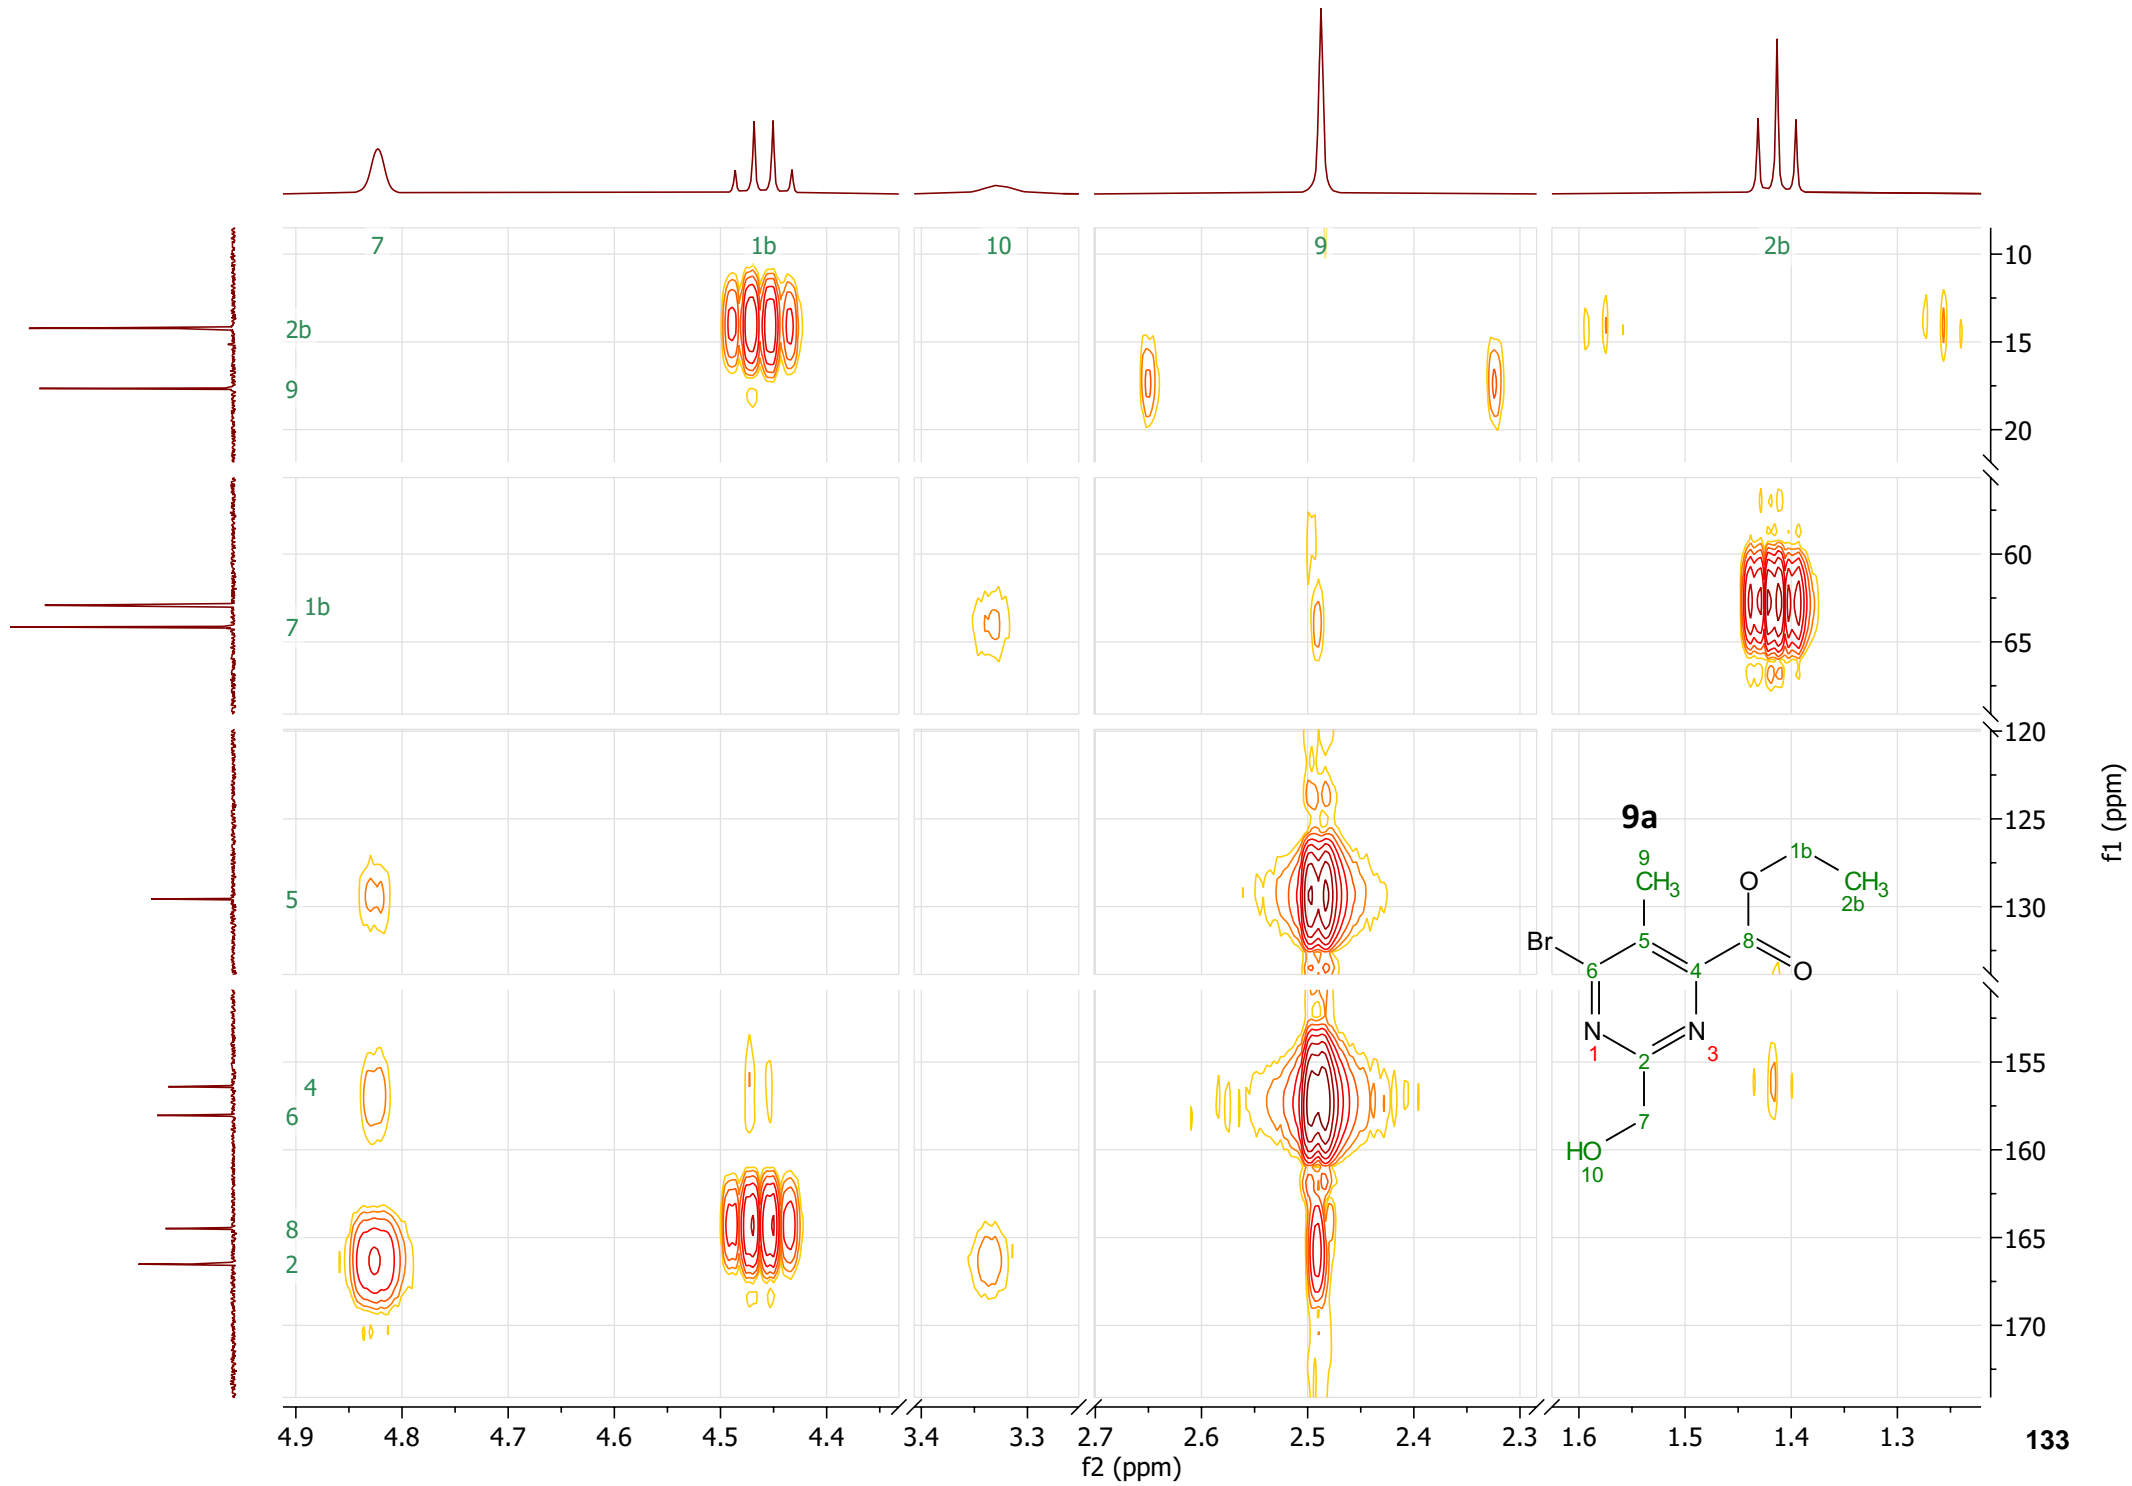

$^1\text{H}$  NMR (400 MHz,  $\text{CDCl}_3$ )  $\delta$  4.83 (d,  $J = 5.1$  Hz, 2H), 4.41 (t,  $J = 6.8, 1.3$  Hz, 2H), 3.27 (t,  $J = 5.5$  Hz, 1H), 2.49 (app t,  $J = 0.8$  Hz, 3H), 1.82 – 1.70 (m, 2H), 1.52 – 1.38 (m, 2H), 0.97 (t,  $J = 7.4$  Hz, 3H).

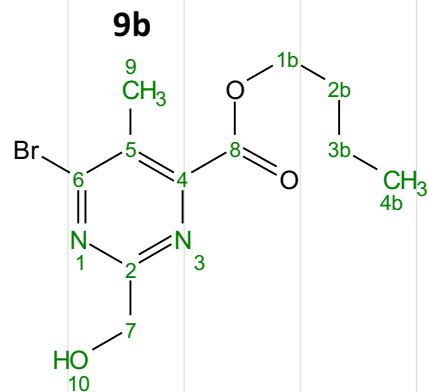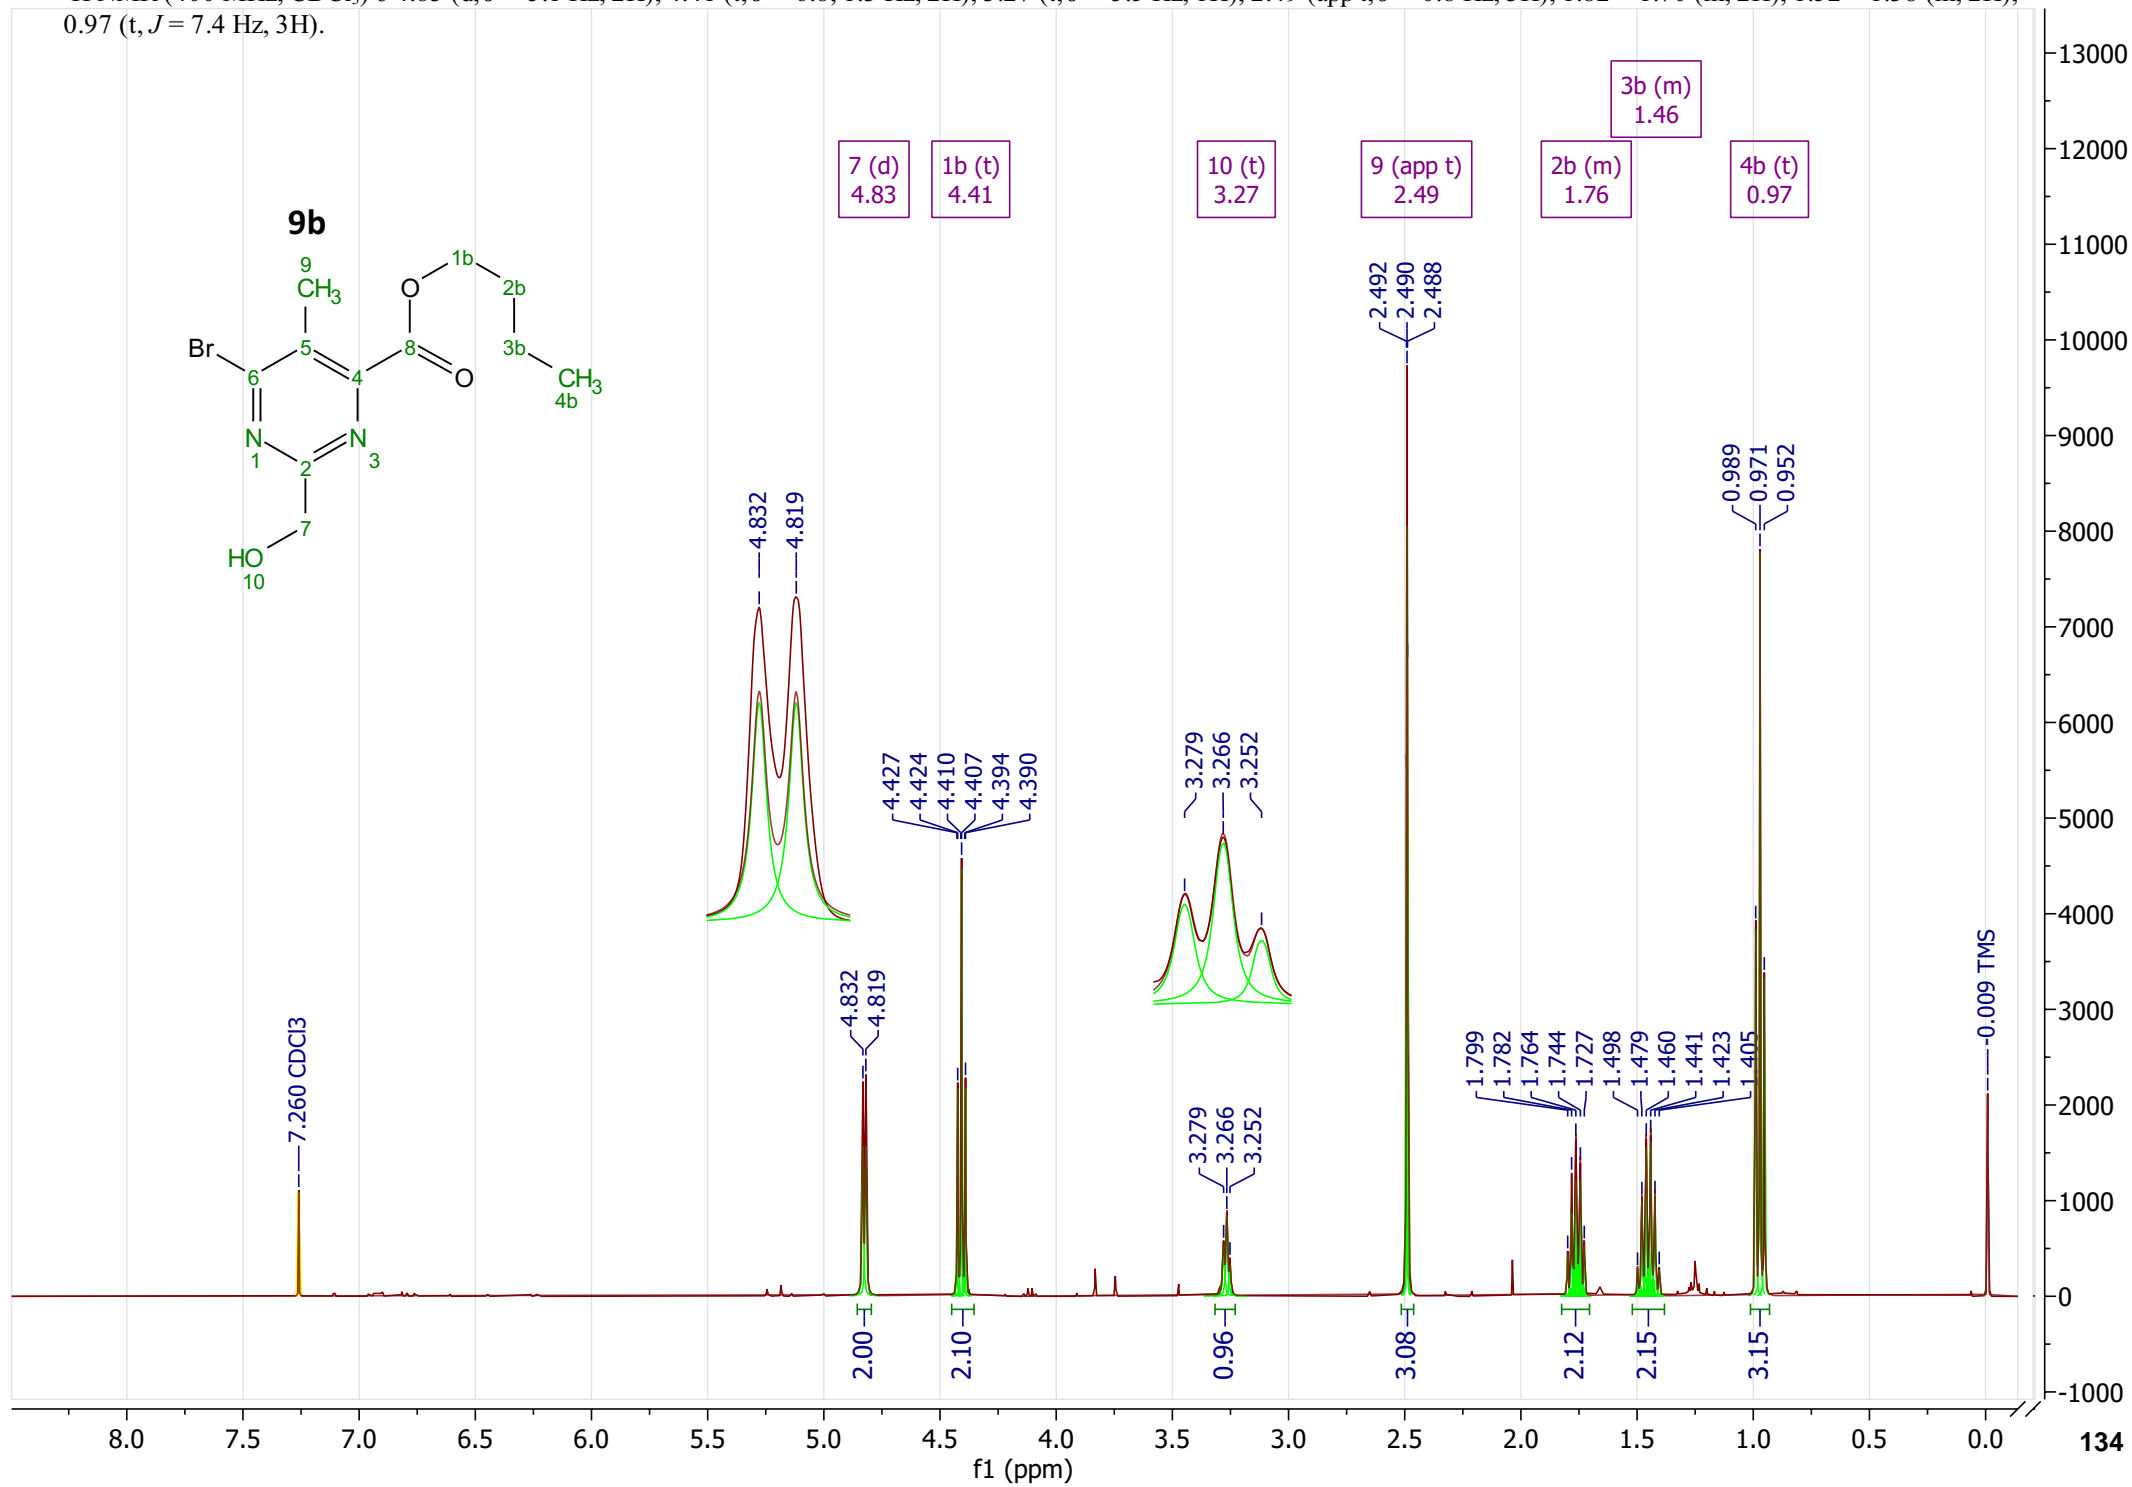

$^{13}\text{C}$  NMR (101 MHz,  $\text{CDCl}_3$ )  $\delta$  166.5, 164.6, 158.0, 156.5, 129.5, 66.7, 64.1, 30.6, 19.2, 17.7, 13.8.

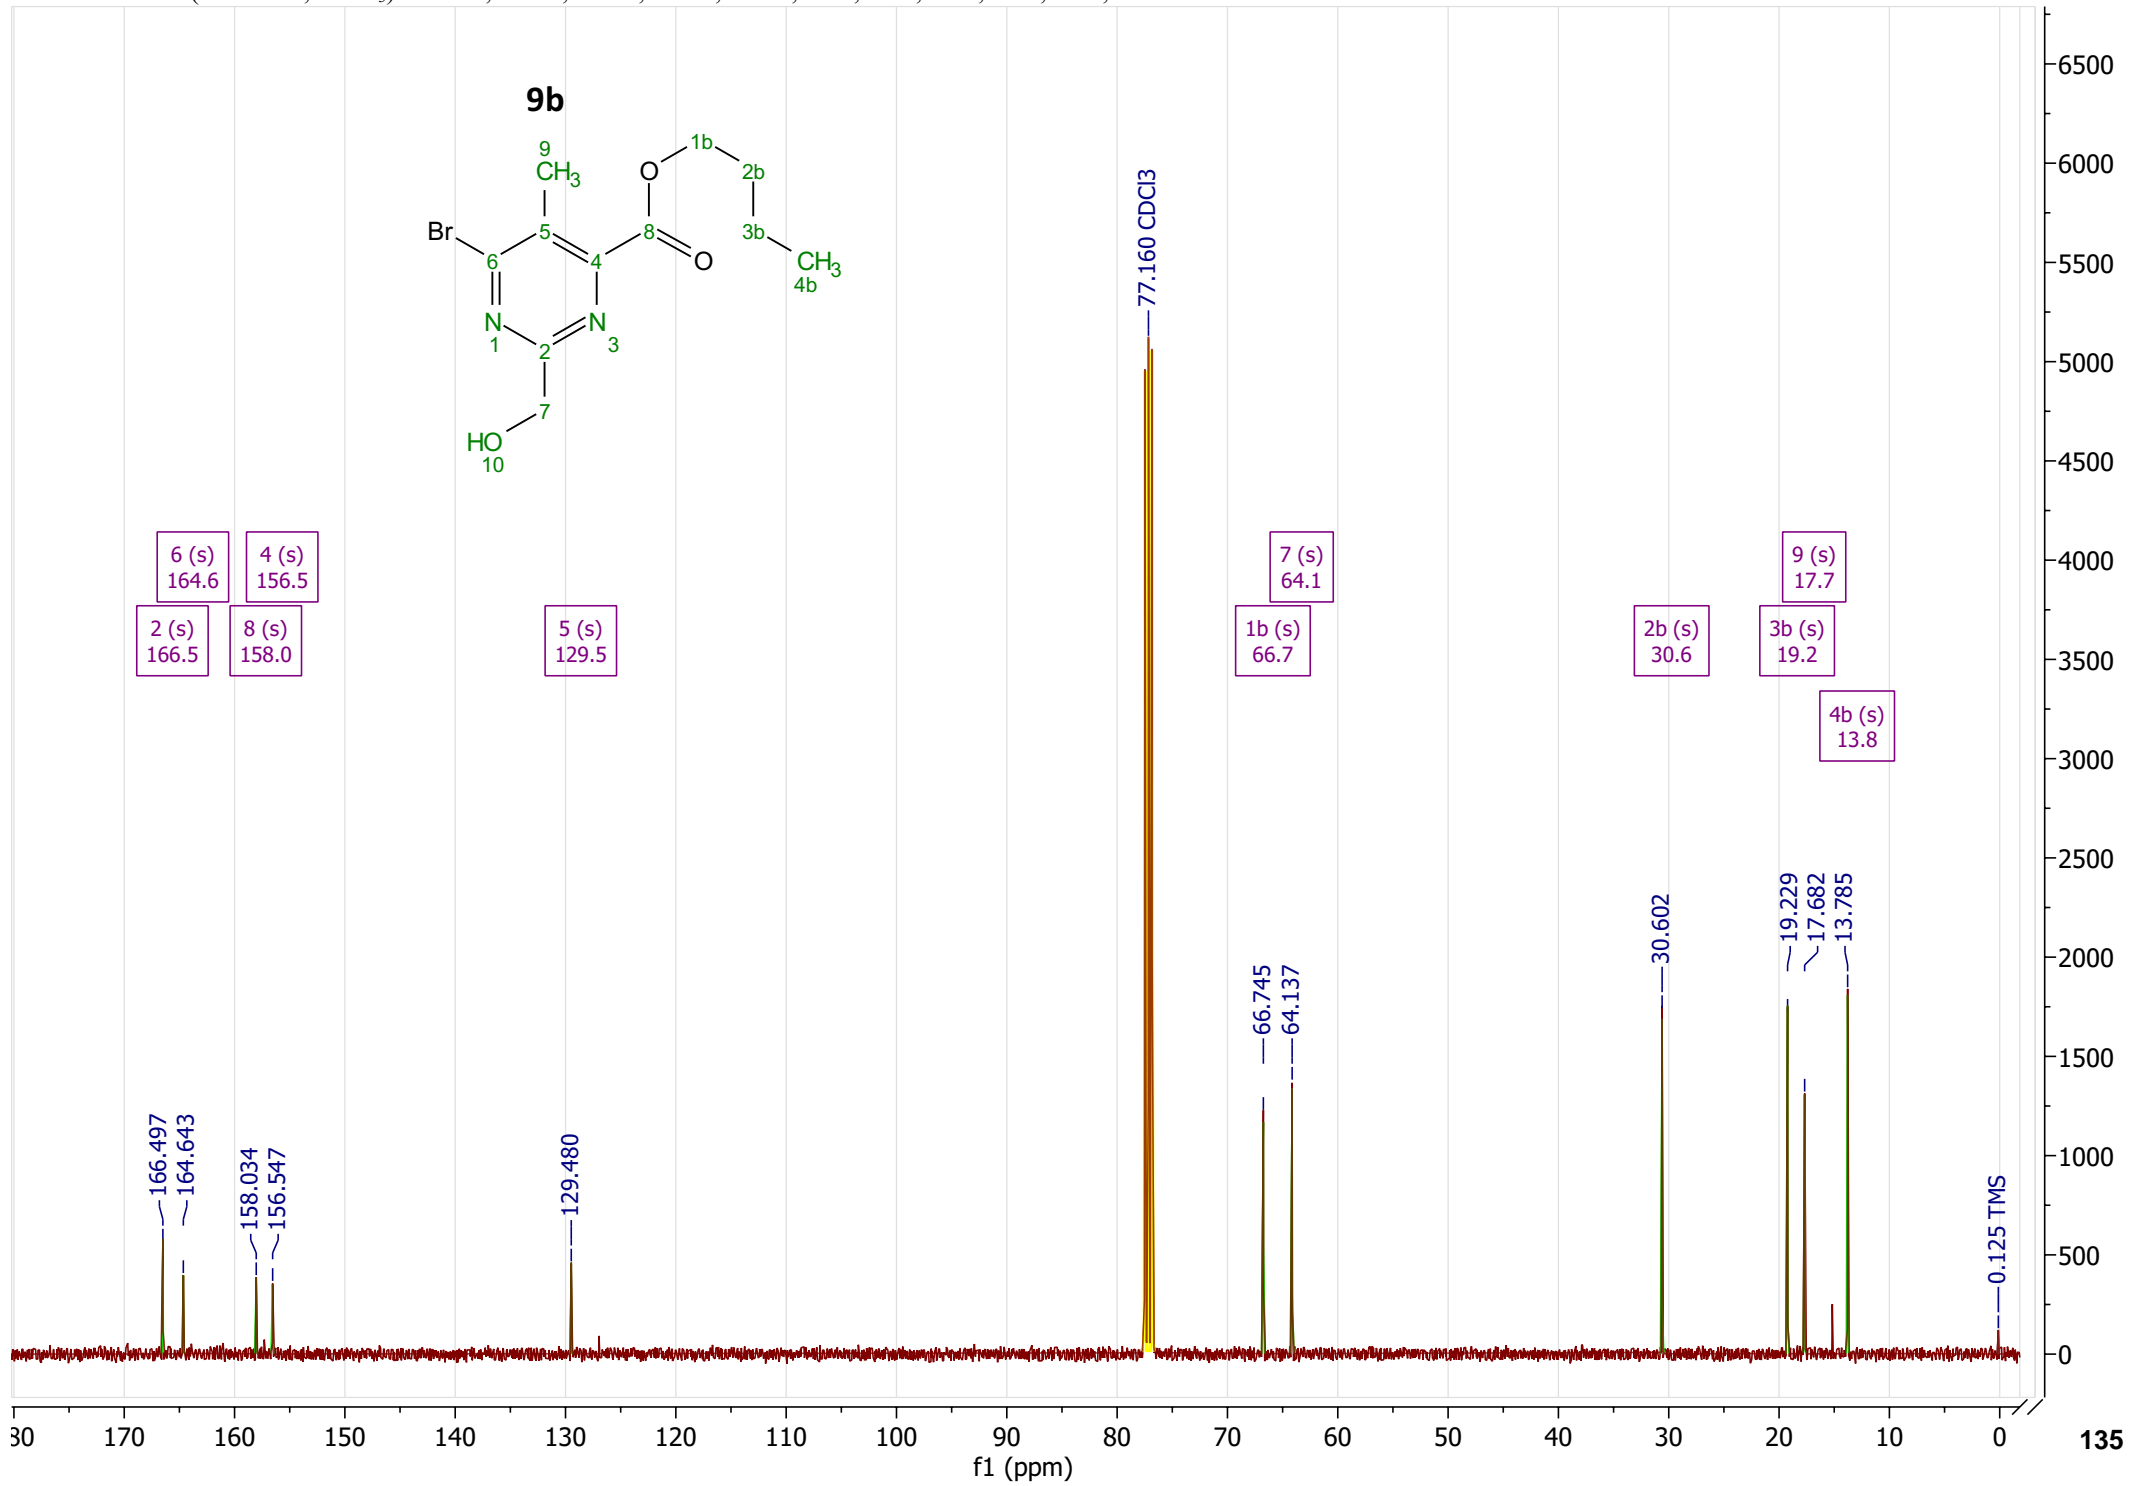

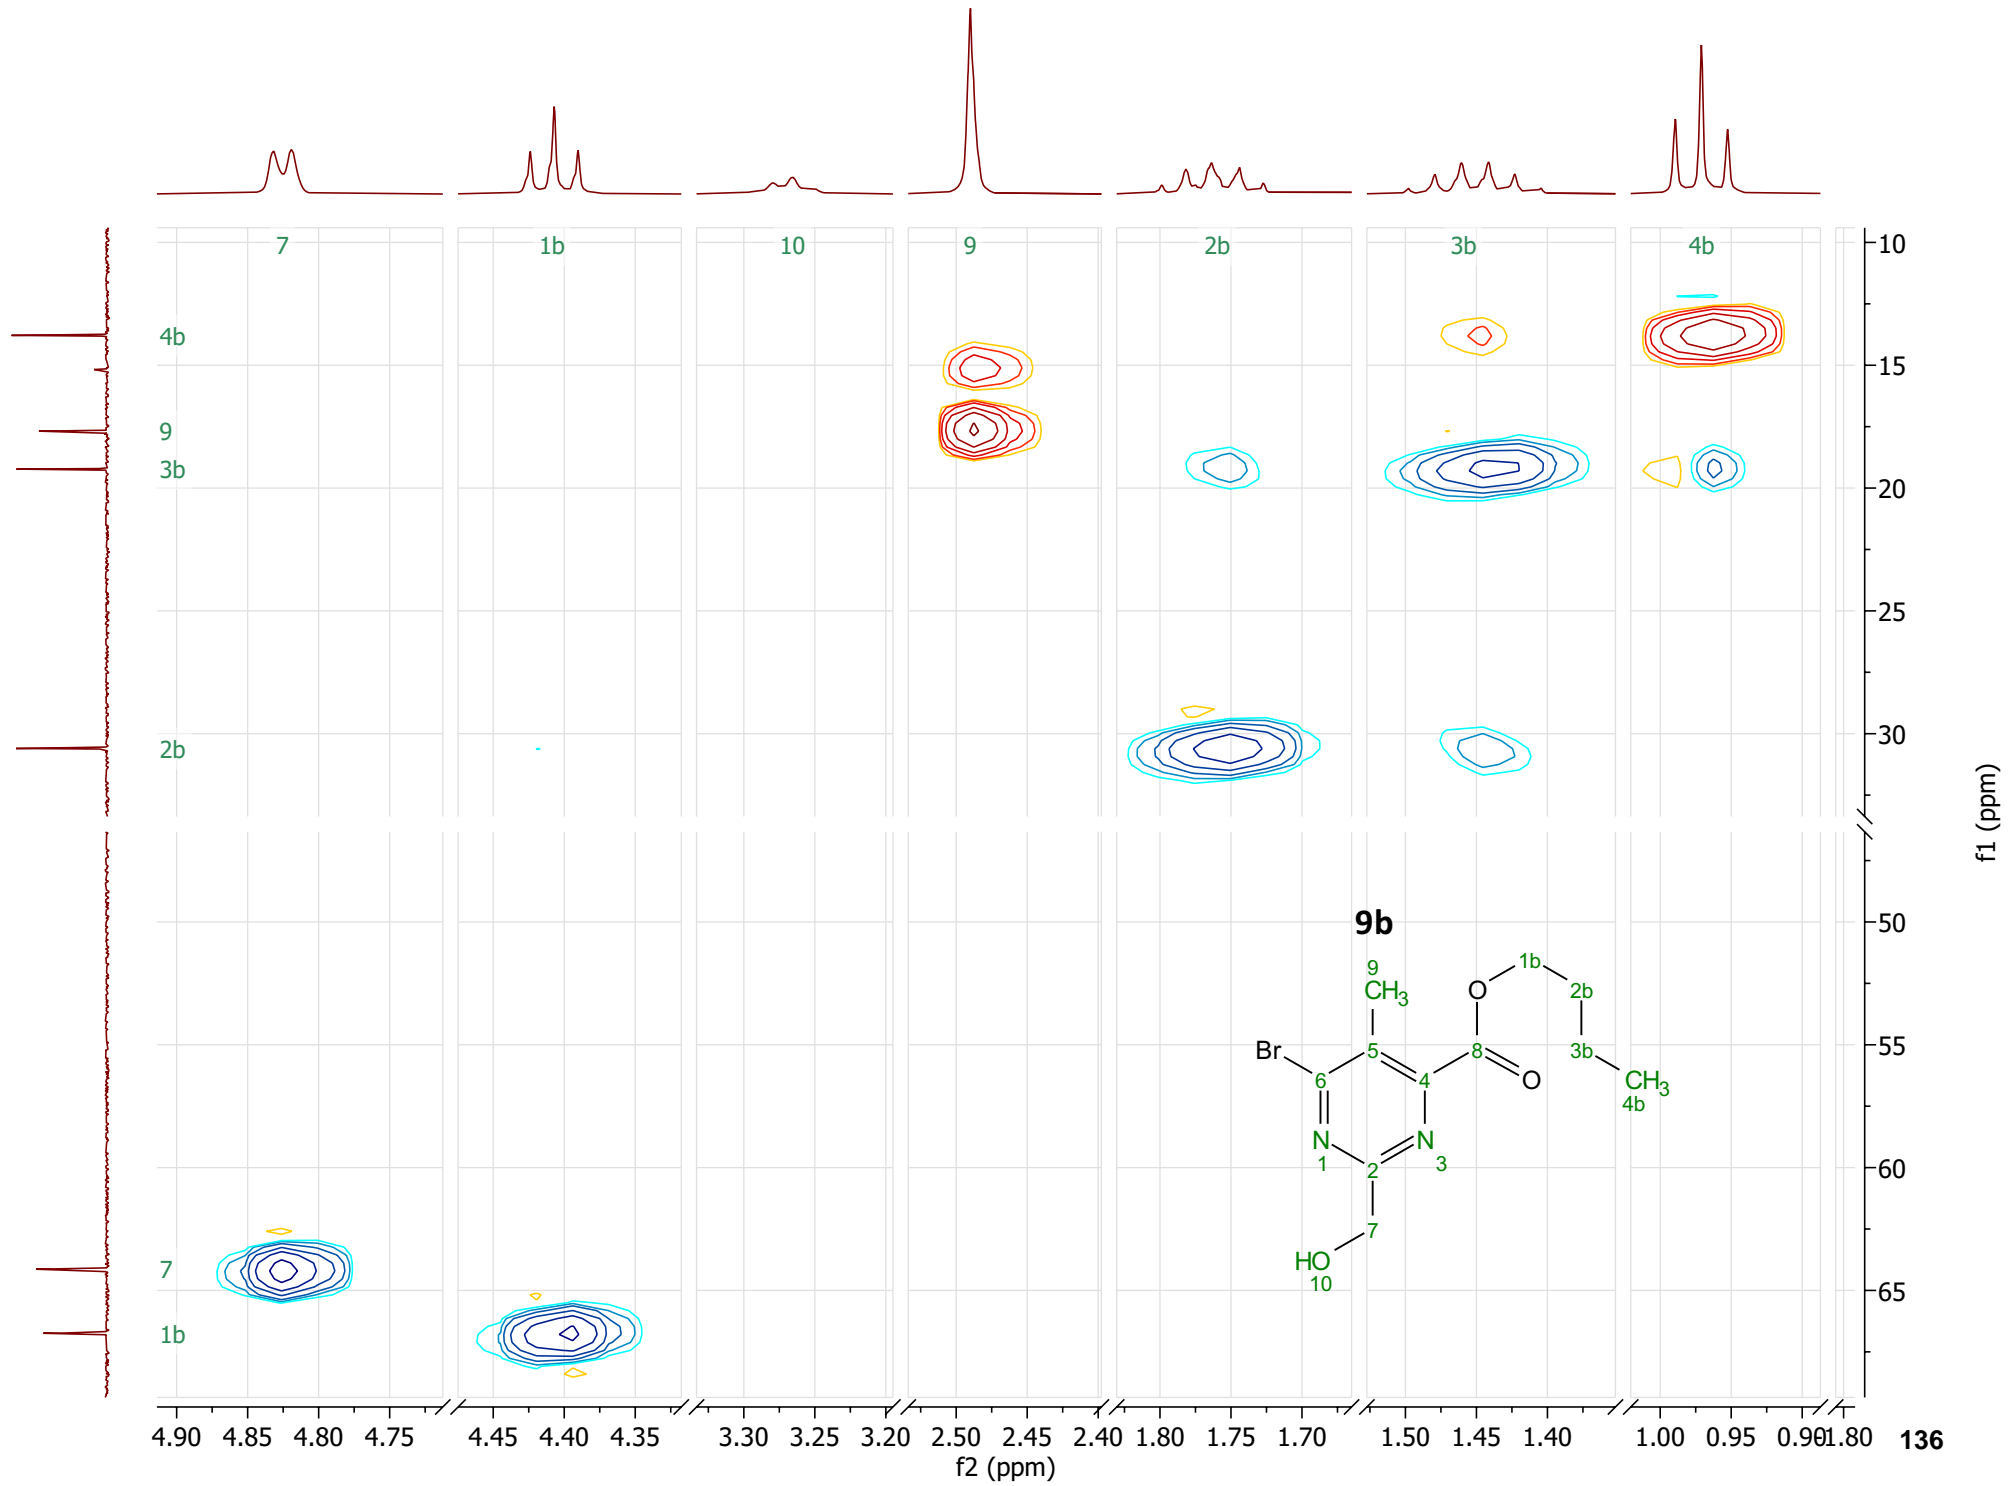



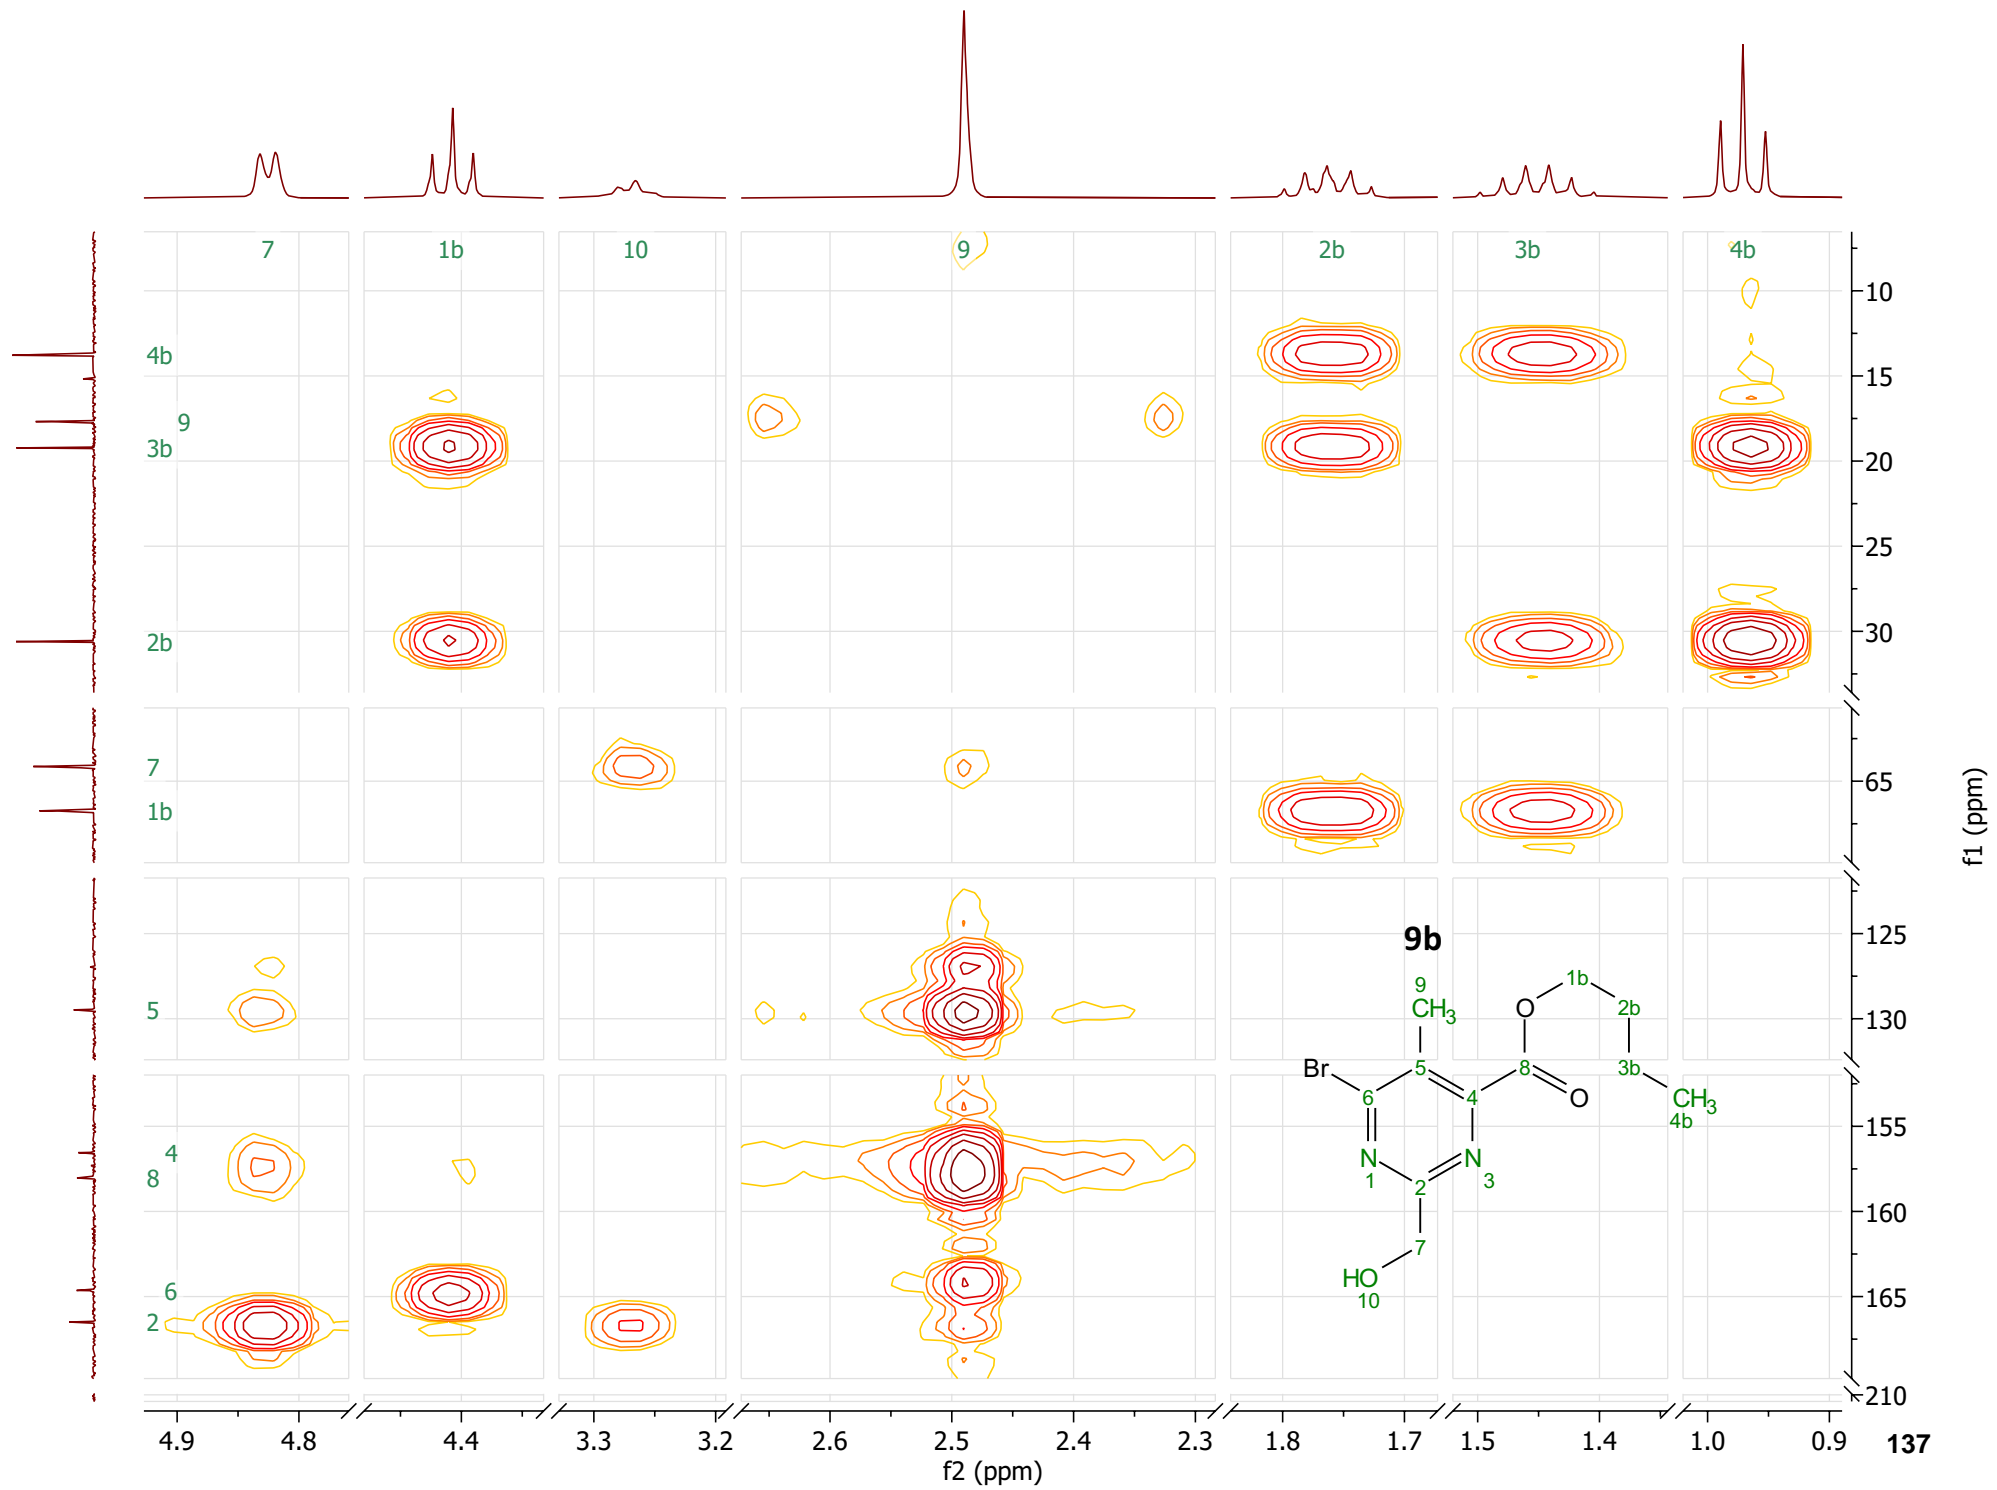

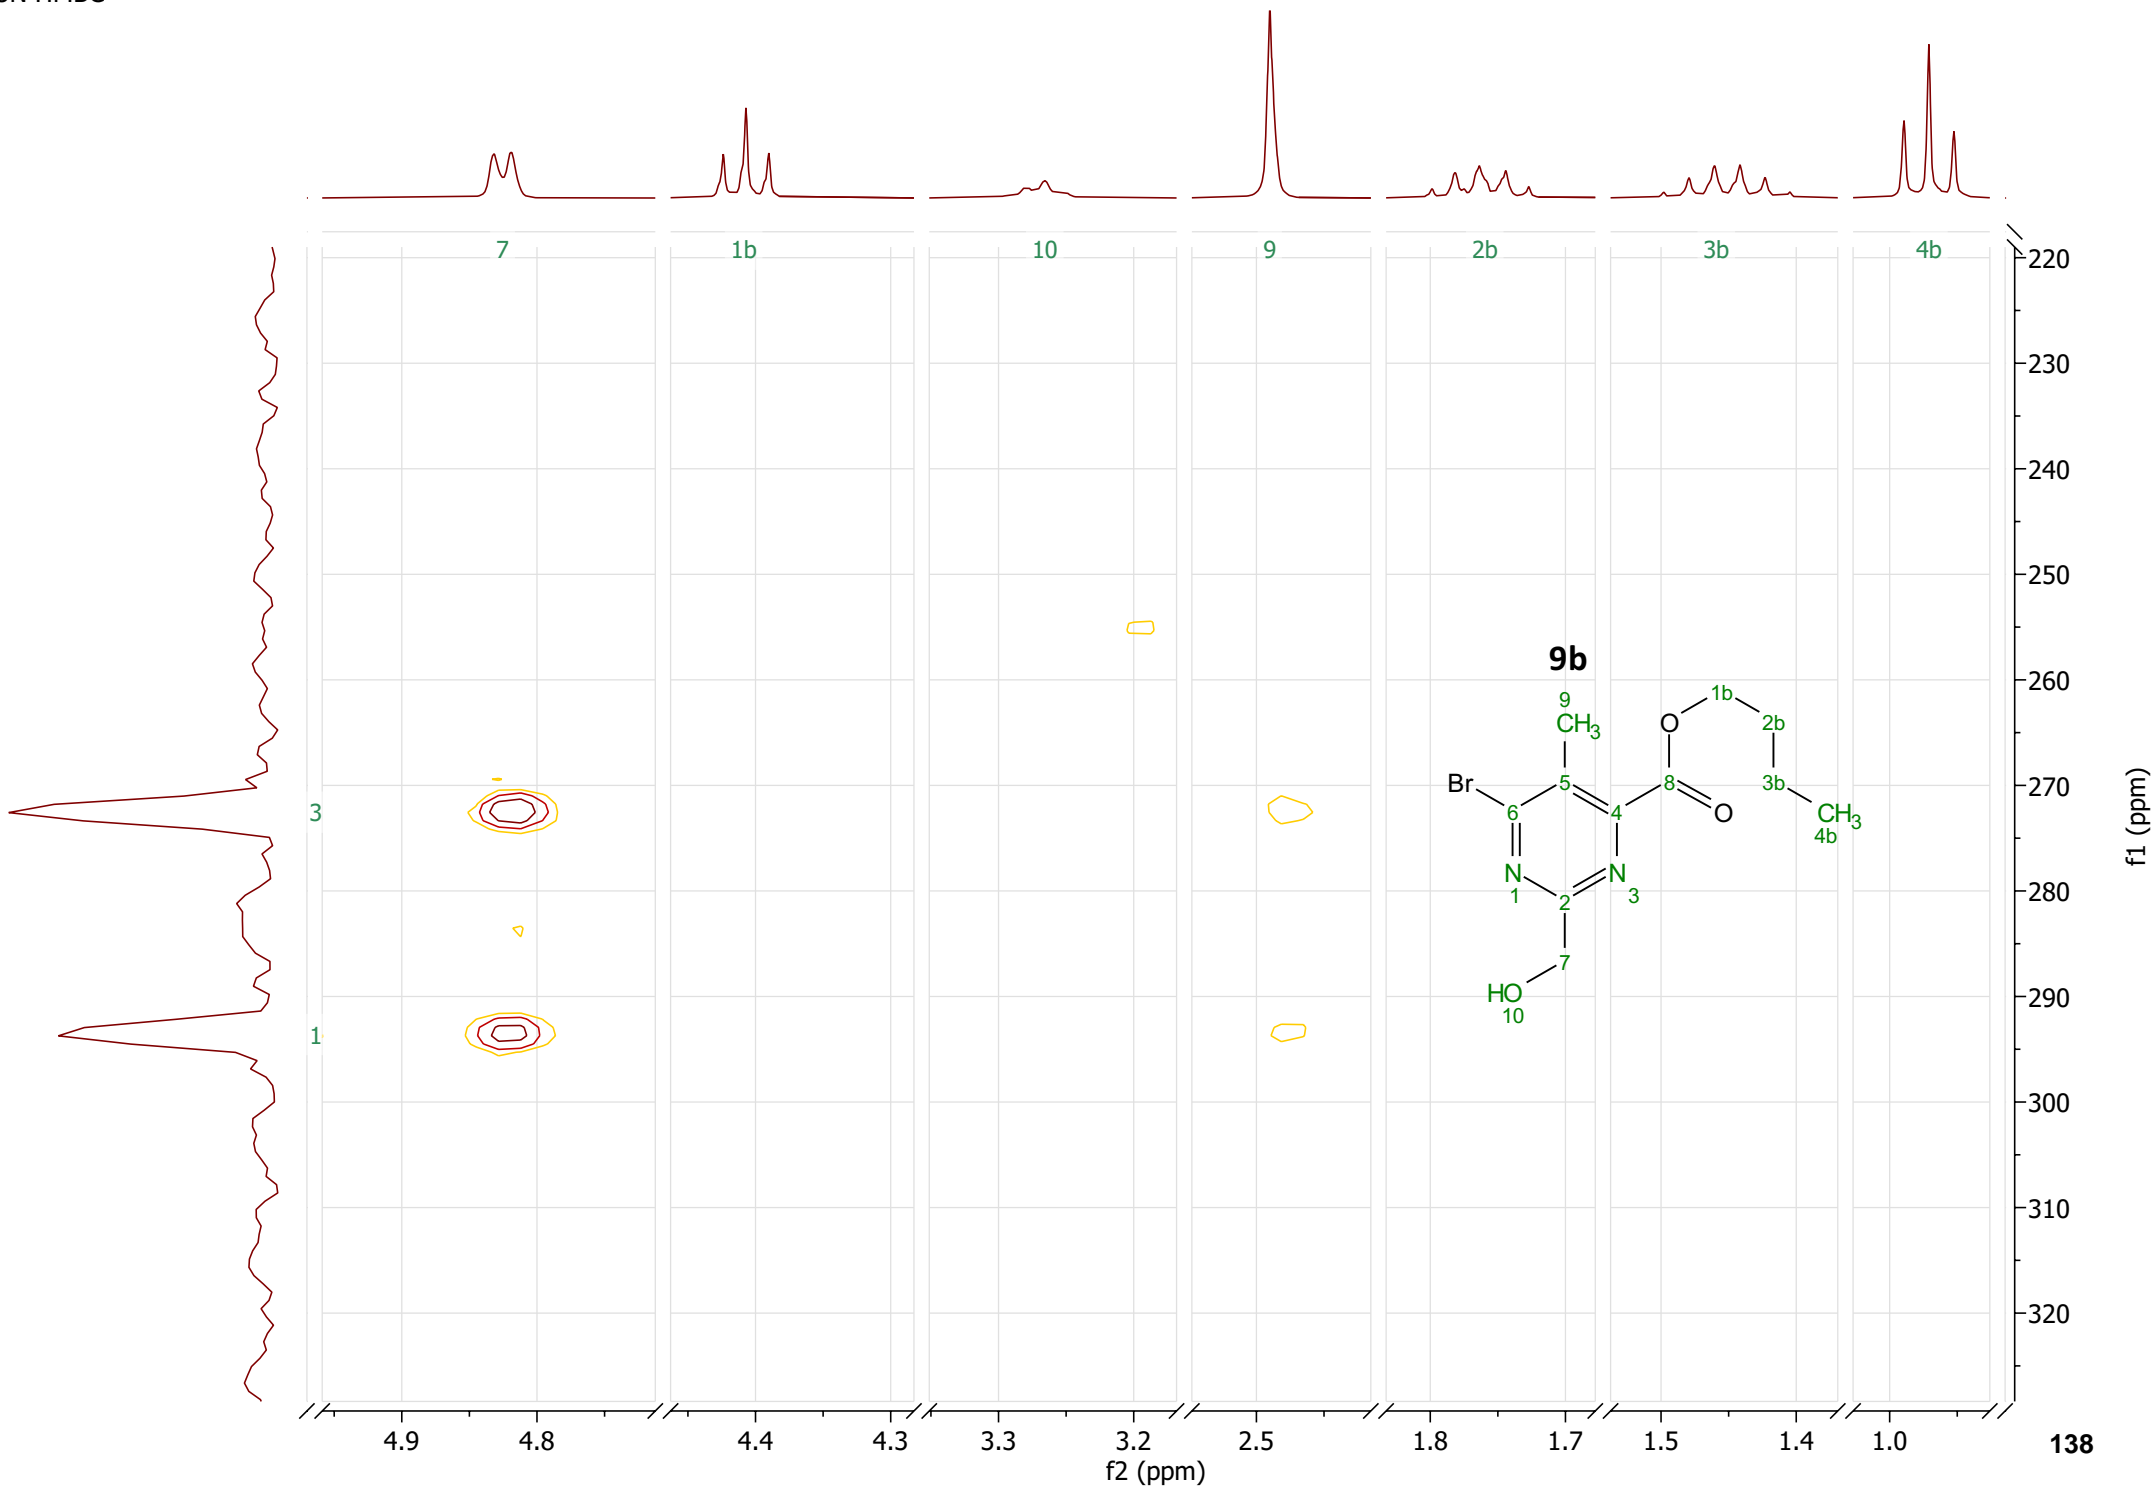

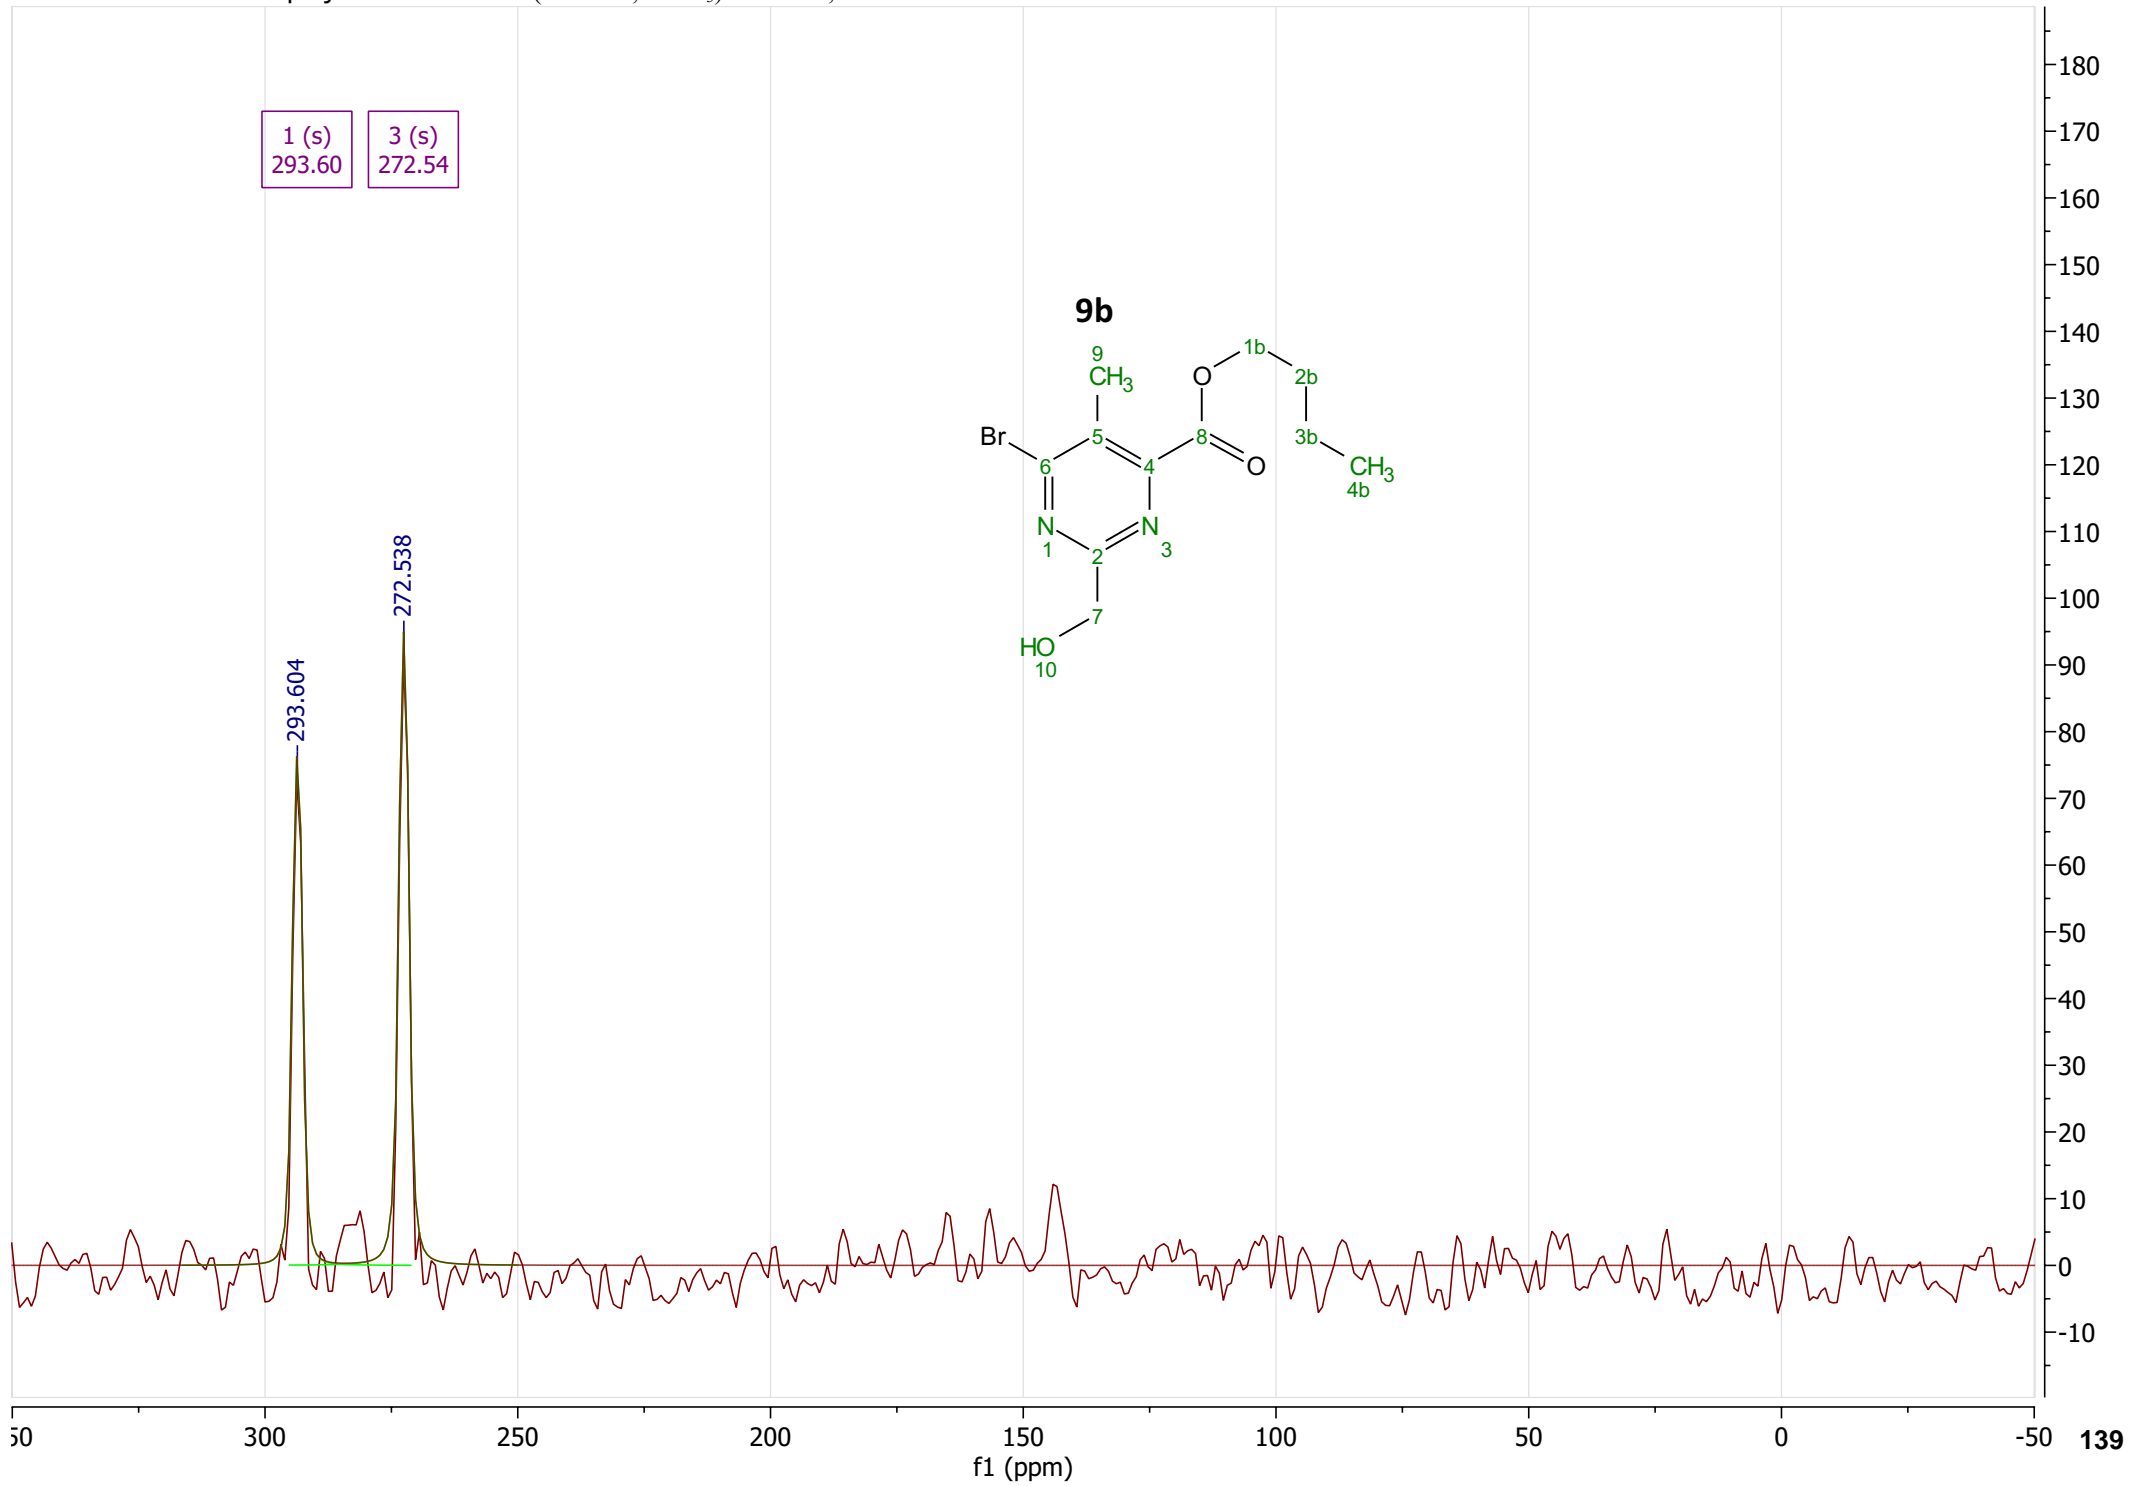

<sup>1</sup>H NMR (400 MHz, CDCl<sub>3</sub>) δ 4.83 (d, *J* = 4.5 Hz, 2H), 4.40 (t, *J* = 6.8 Hz, 2H), 3.25 (t, *J* = 5.4 Hz, 1H), 2.50 (app t, *J* = 0.8 Hz, 3H), 1.84 – 1.72 (m, 2H), 1.47 – 1.38 (m, 2H), 1.37 – 1.24 (m, 6H), 0.89 (app t, *J* = 6.9 Hz, 3H).

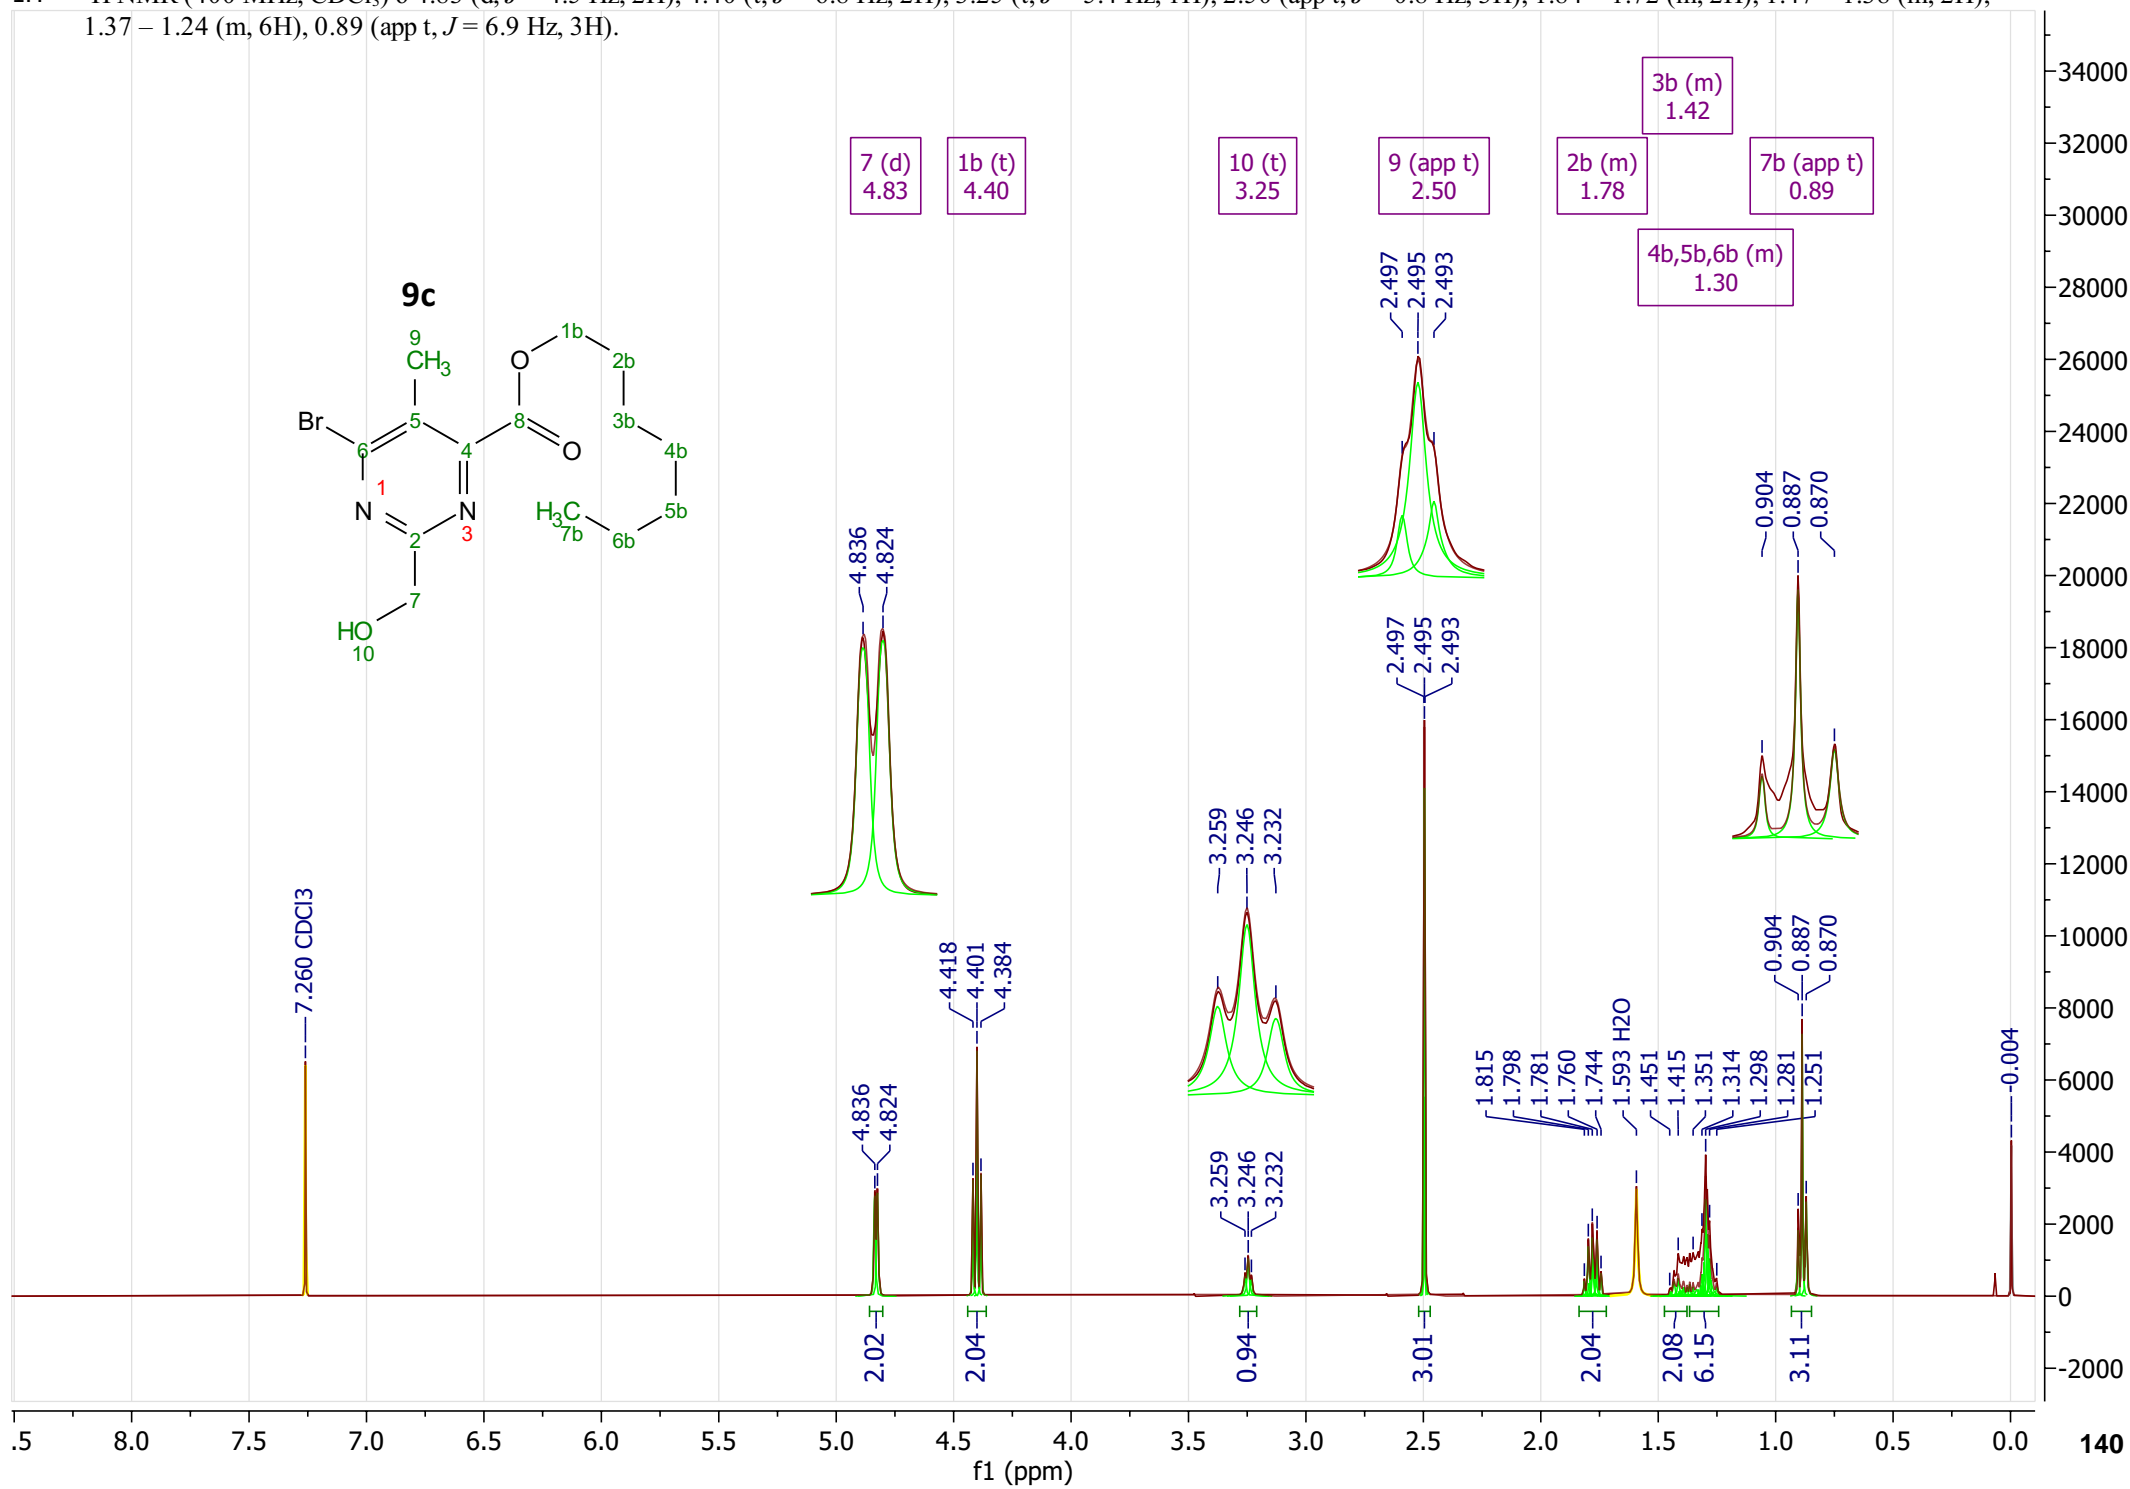

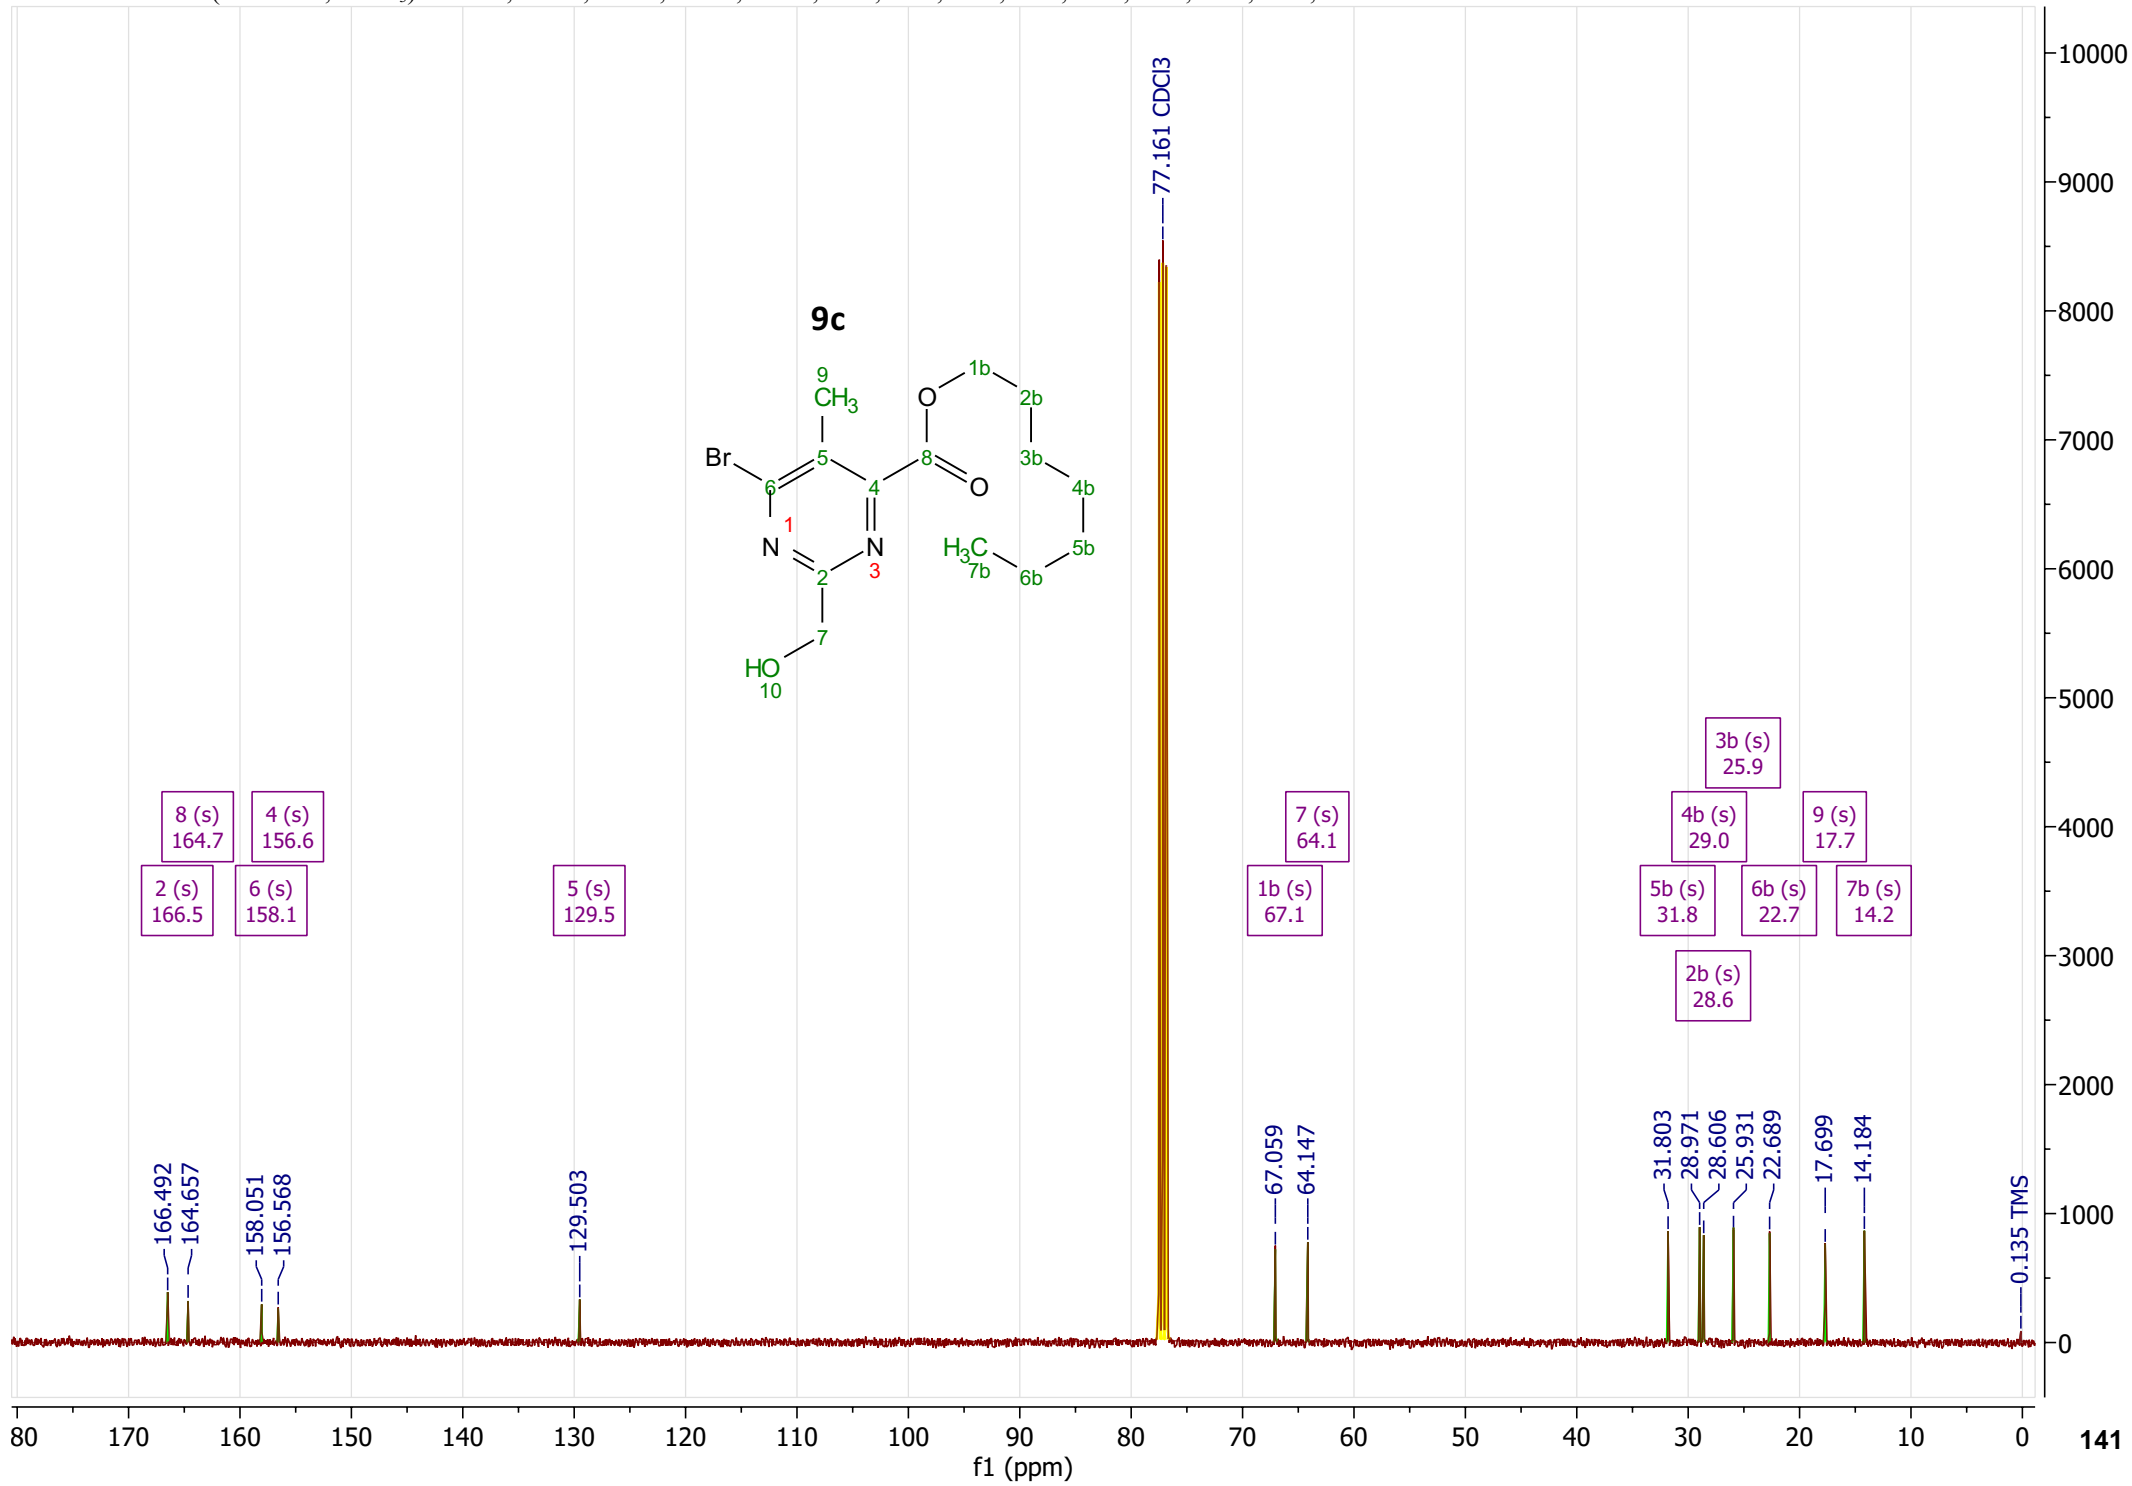

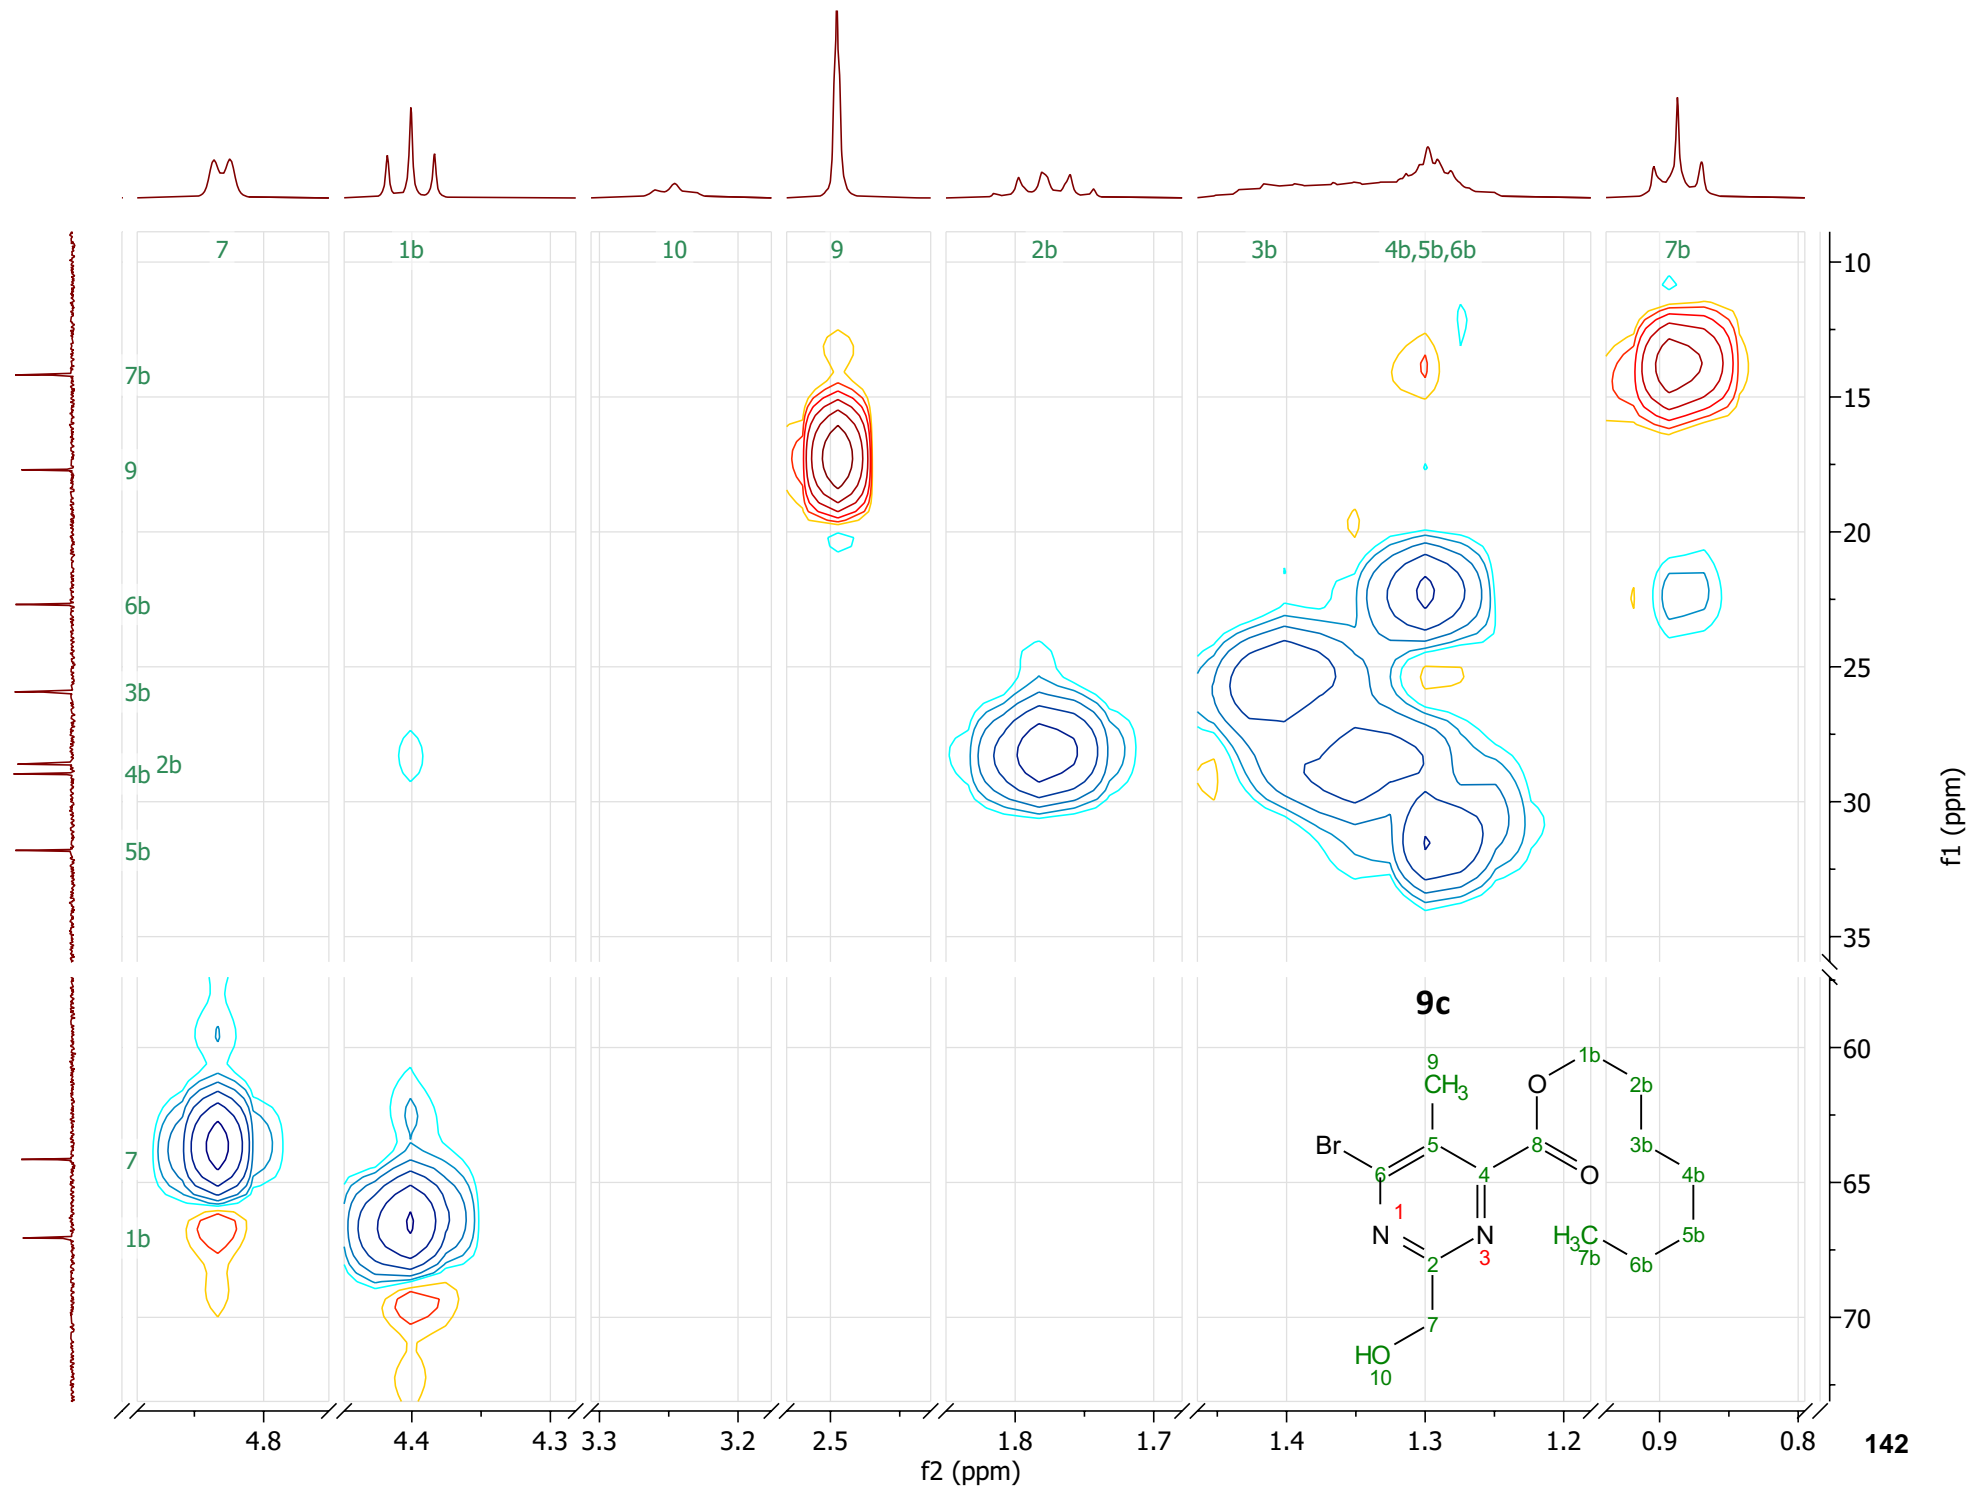

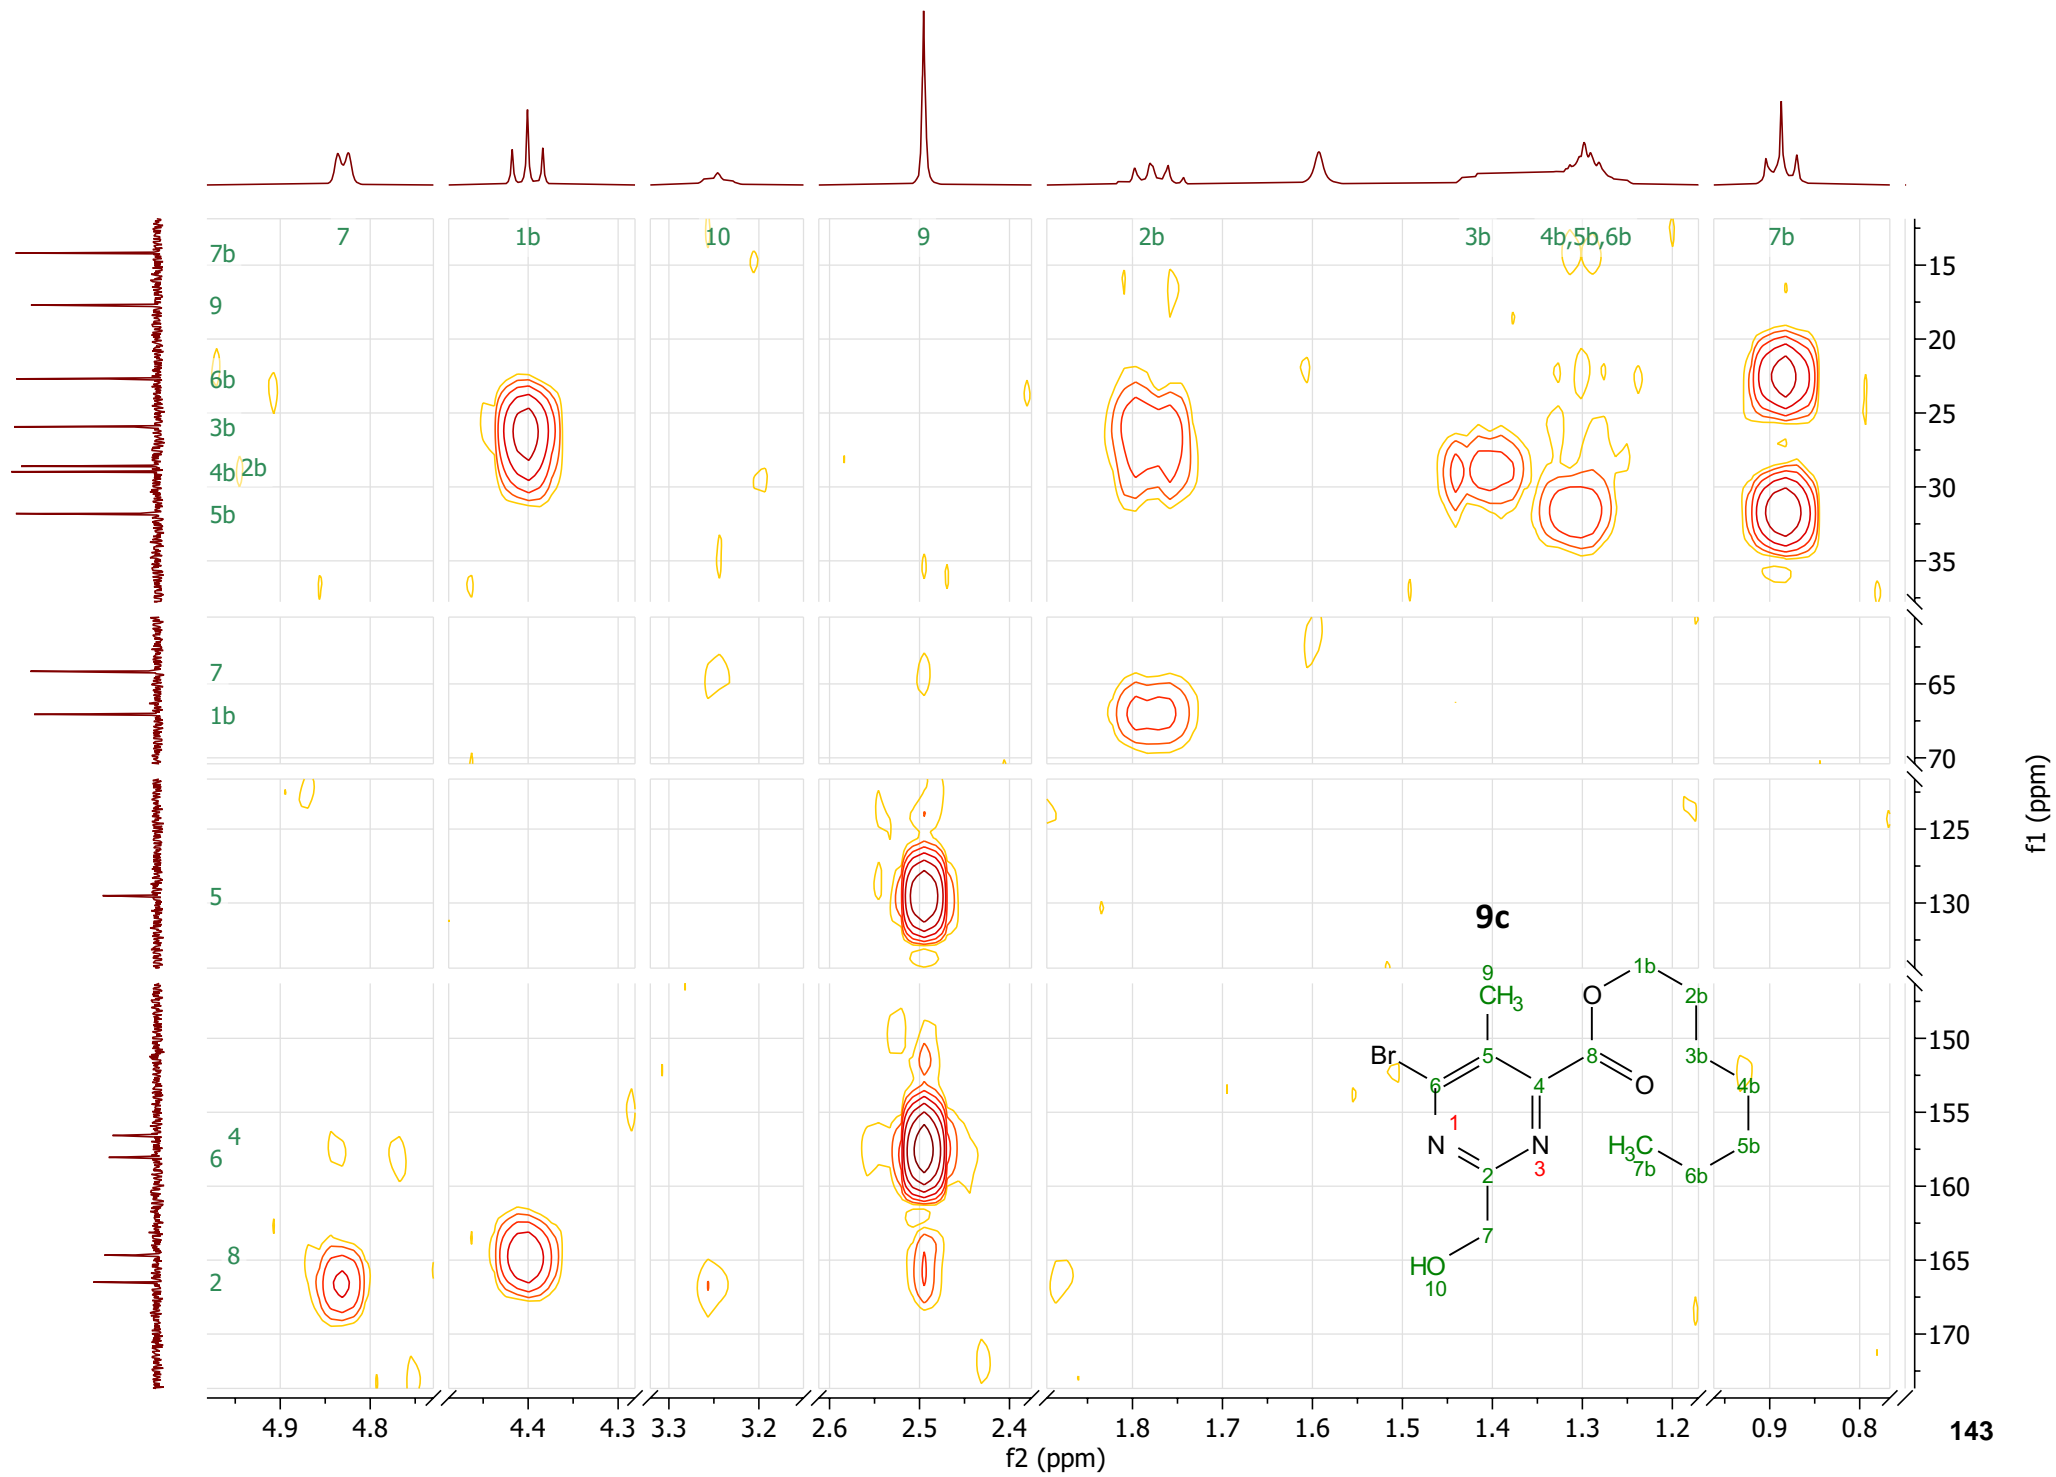

<sup>1</sup>H NMR (400 MHz, CDCl<sub>3</sub>) δ 4.83 (app q, *J* = 0.8 Hz, 2H), 4.40 (t, *J* = 6.8 Hz, 2H), 3.62 (br s, 1H), 2.50 (app t, *J* = 0.8 Hz, 3H), 1.84 – 1.72 (m, 2H), 1.47 – 1.37 (m, 2H), 1.40 – 1.21 (m, 8H), 0.88 (t, *J* = 6.9 Hz, 3H).

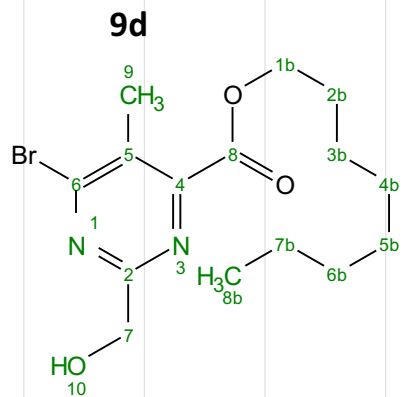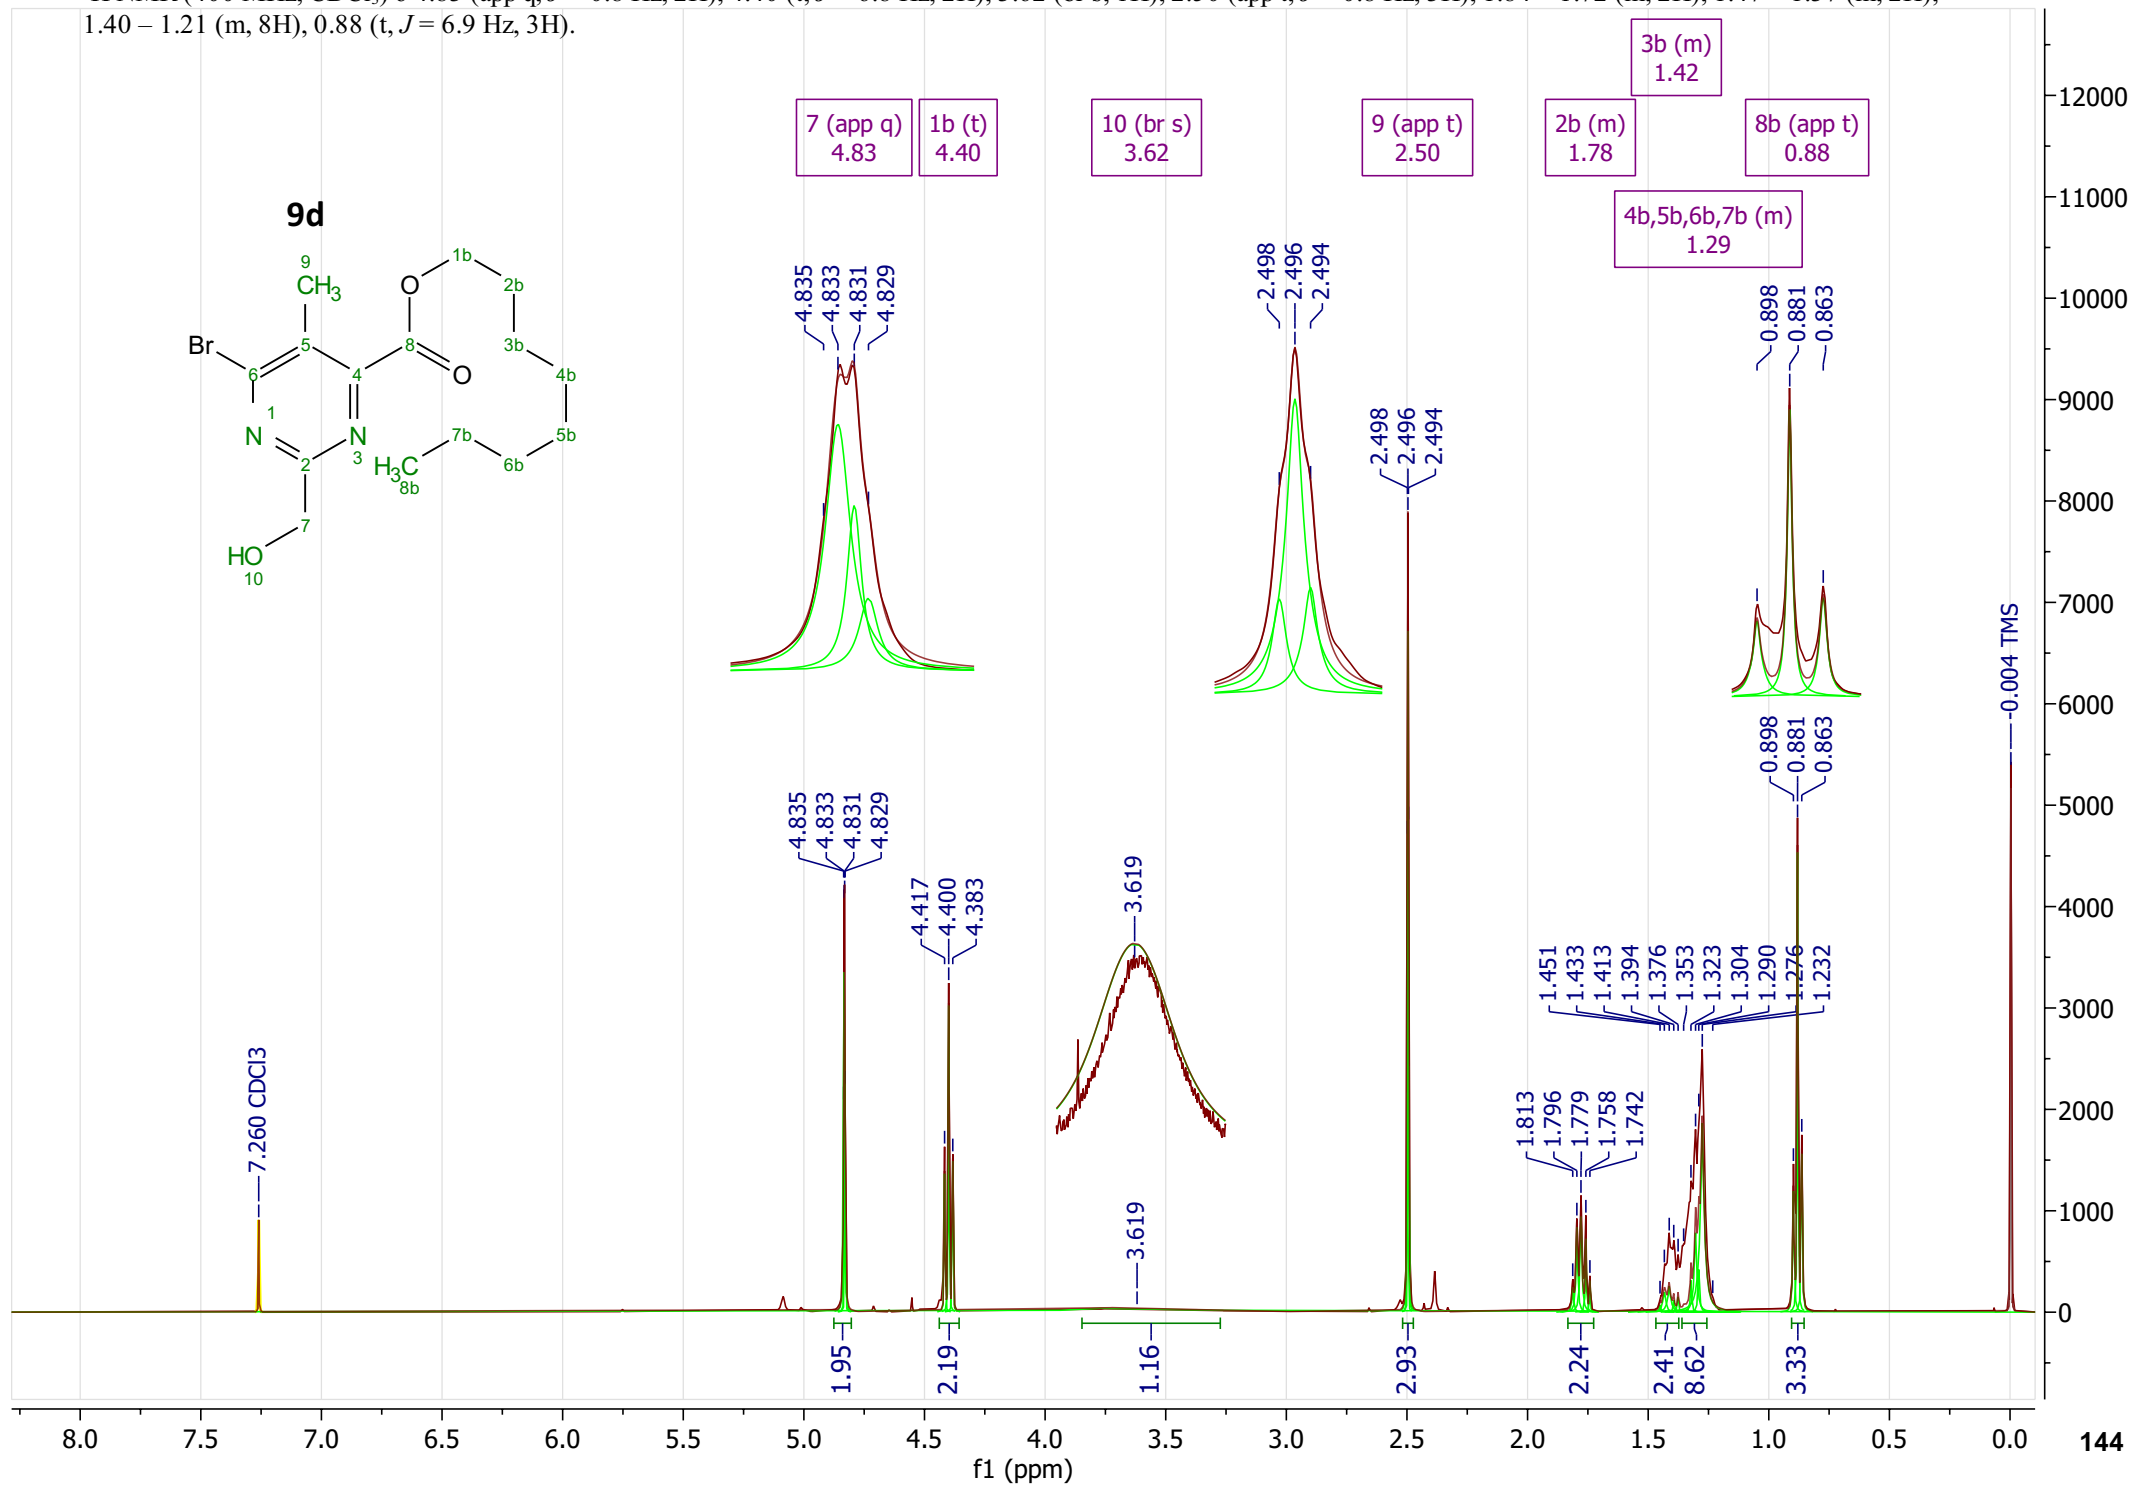



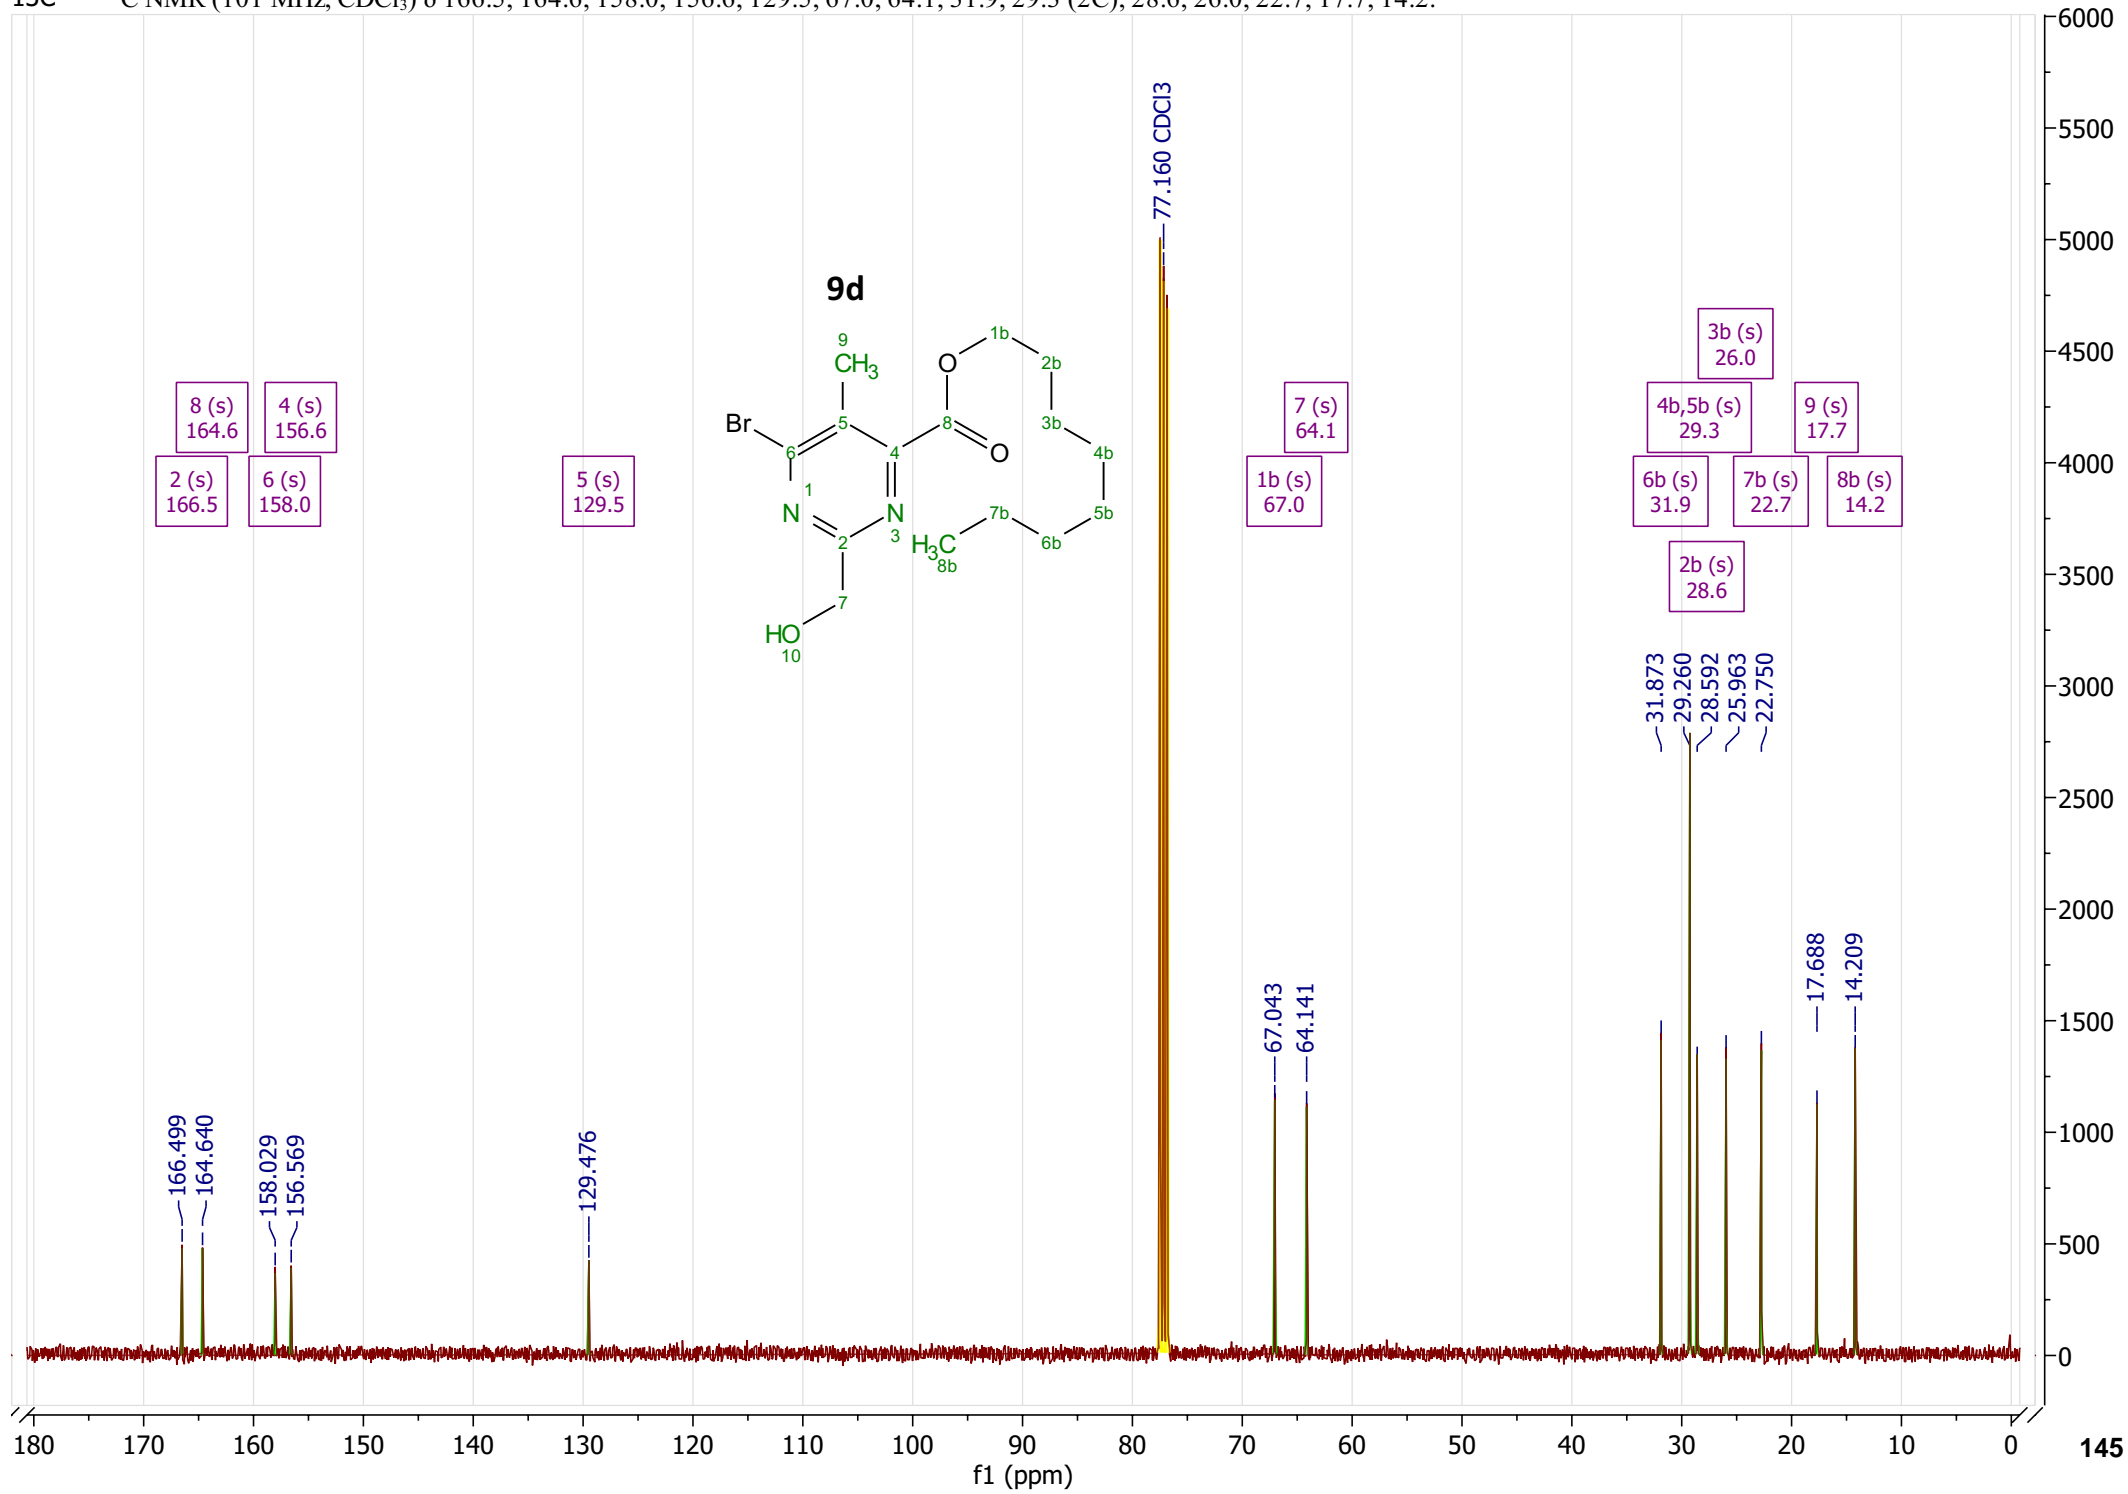

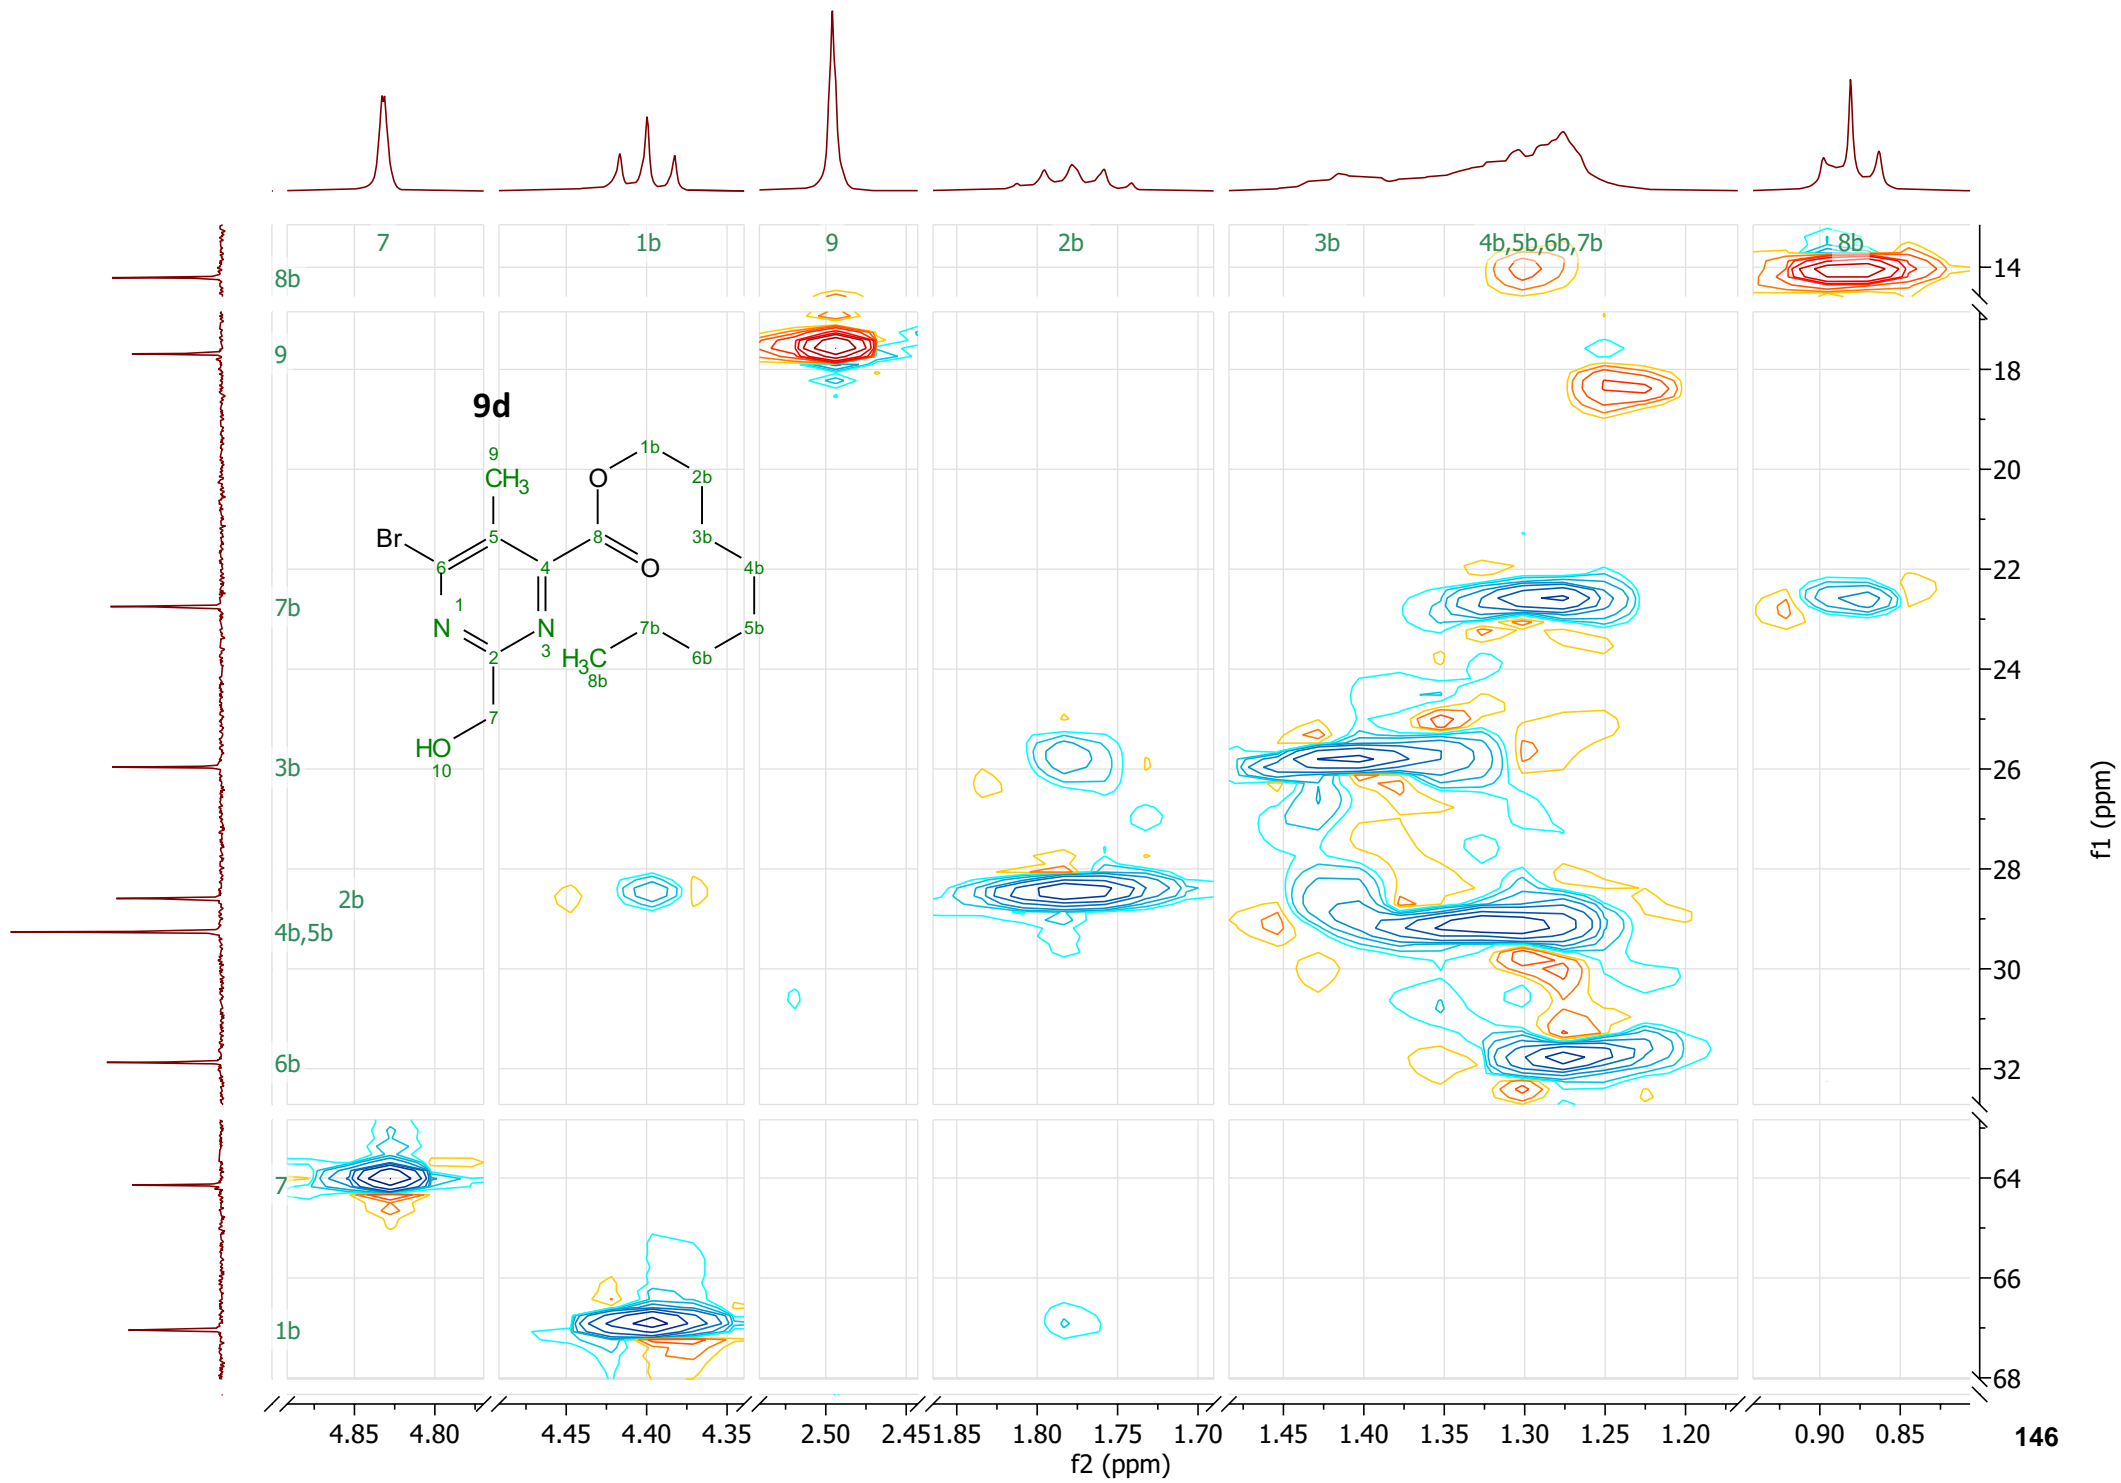

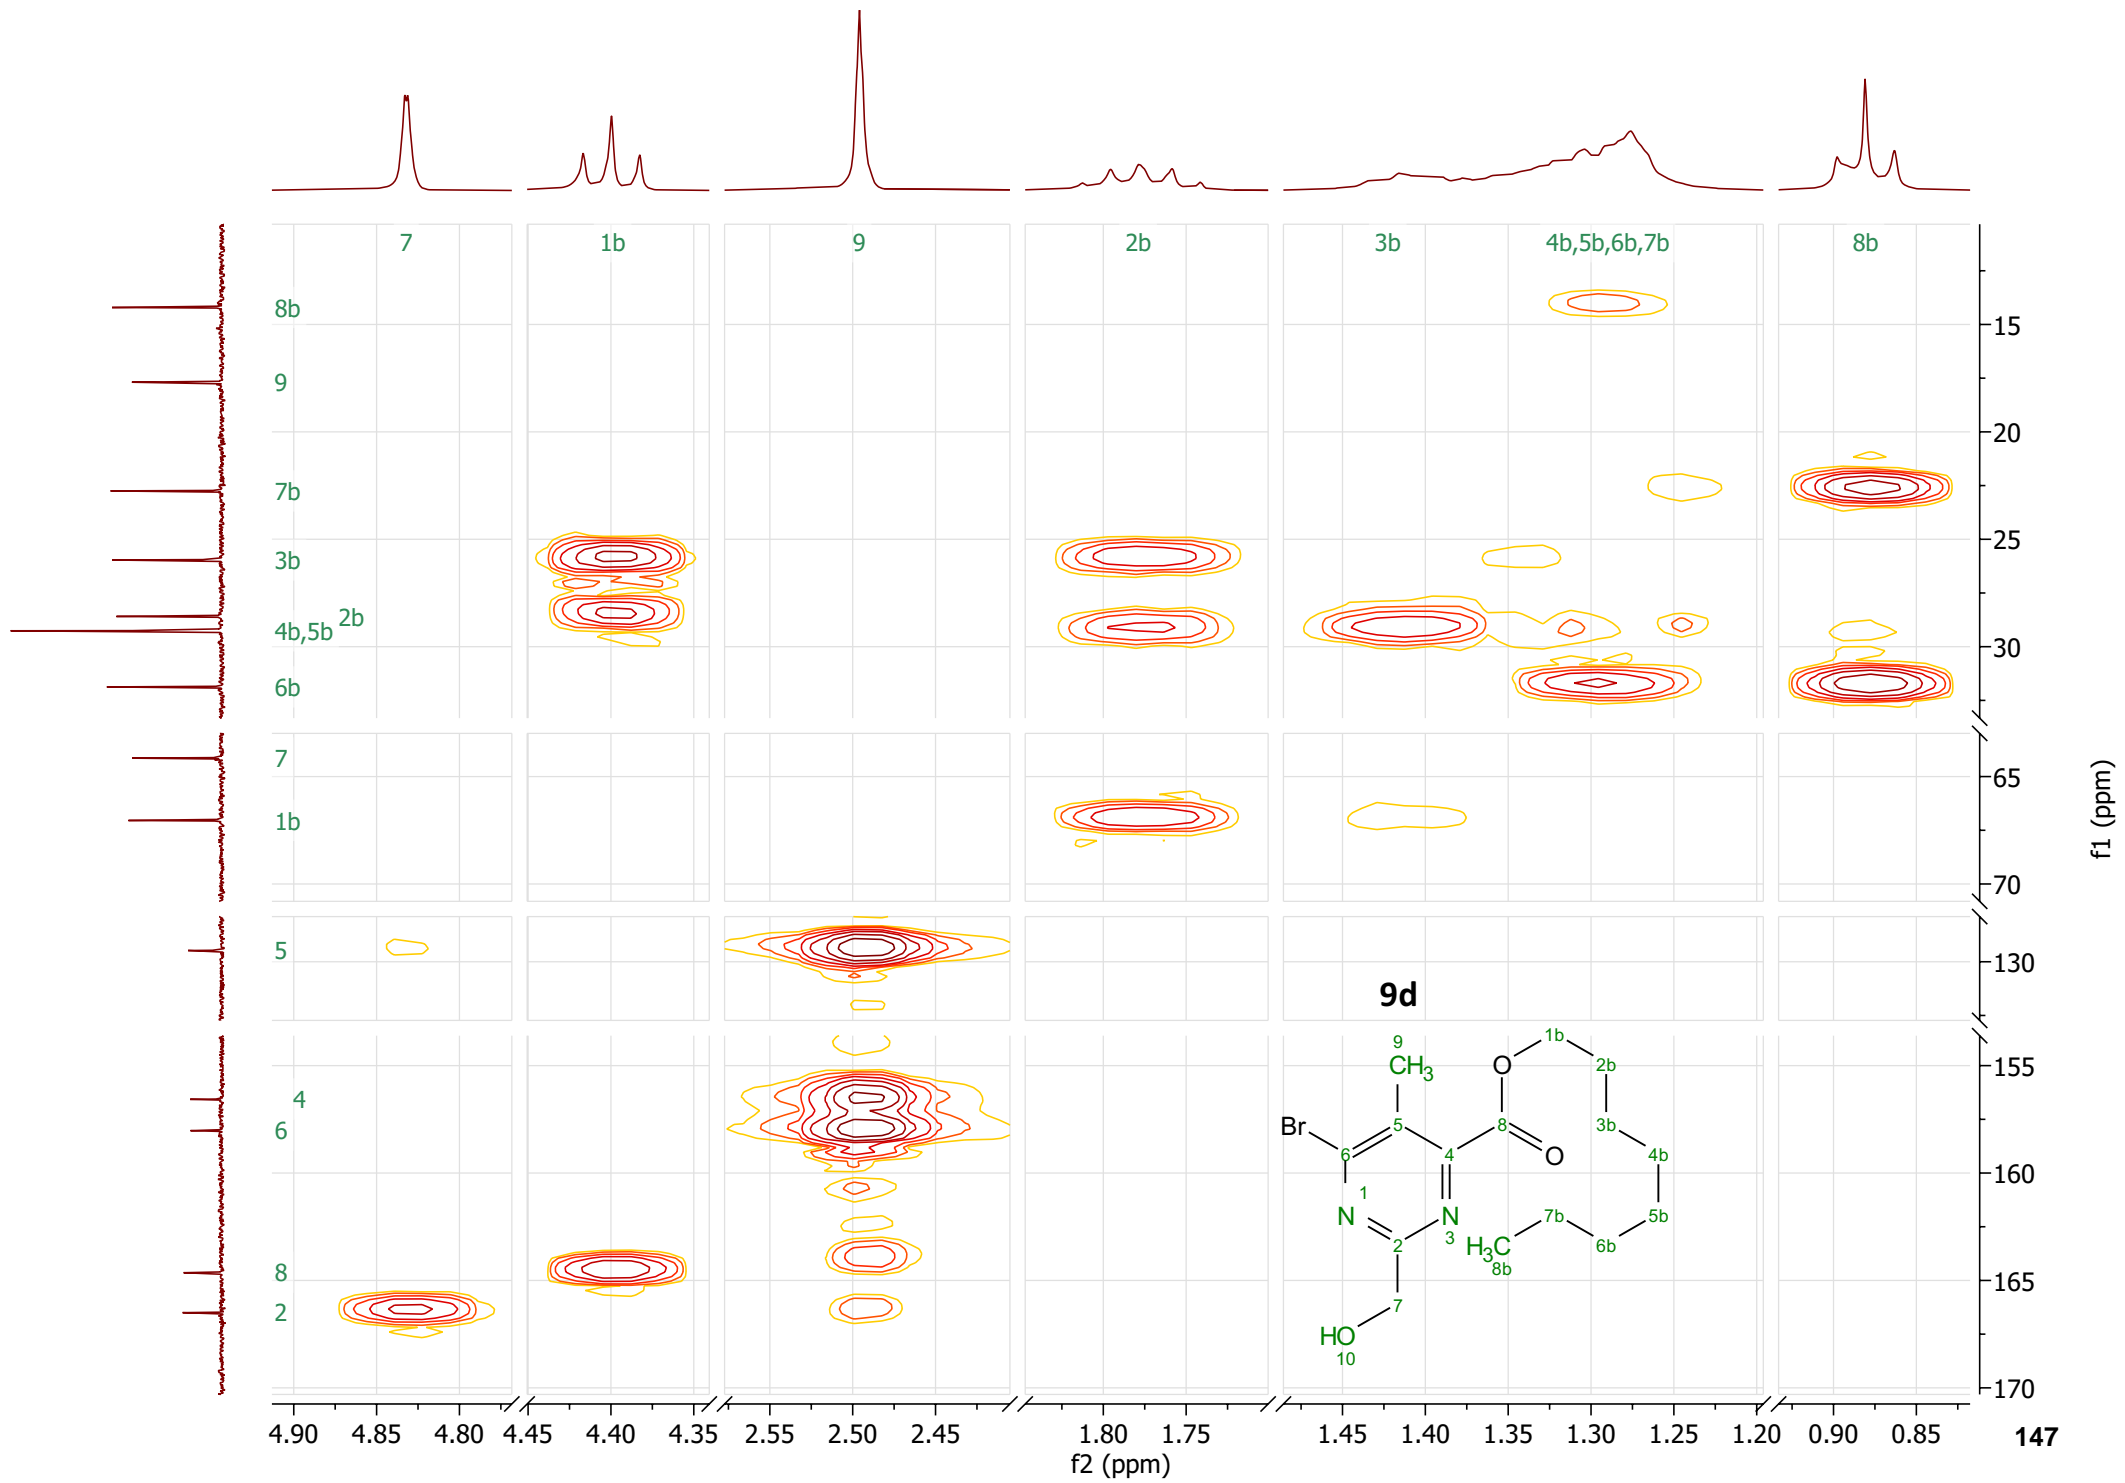

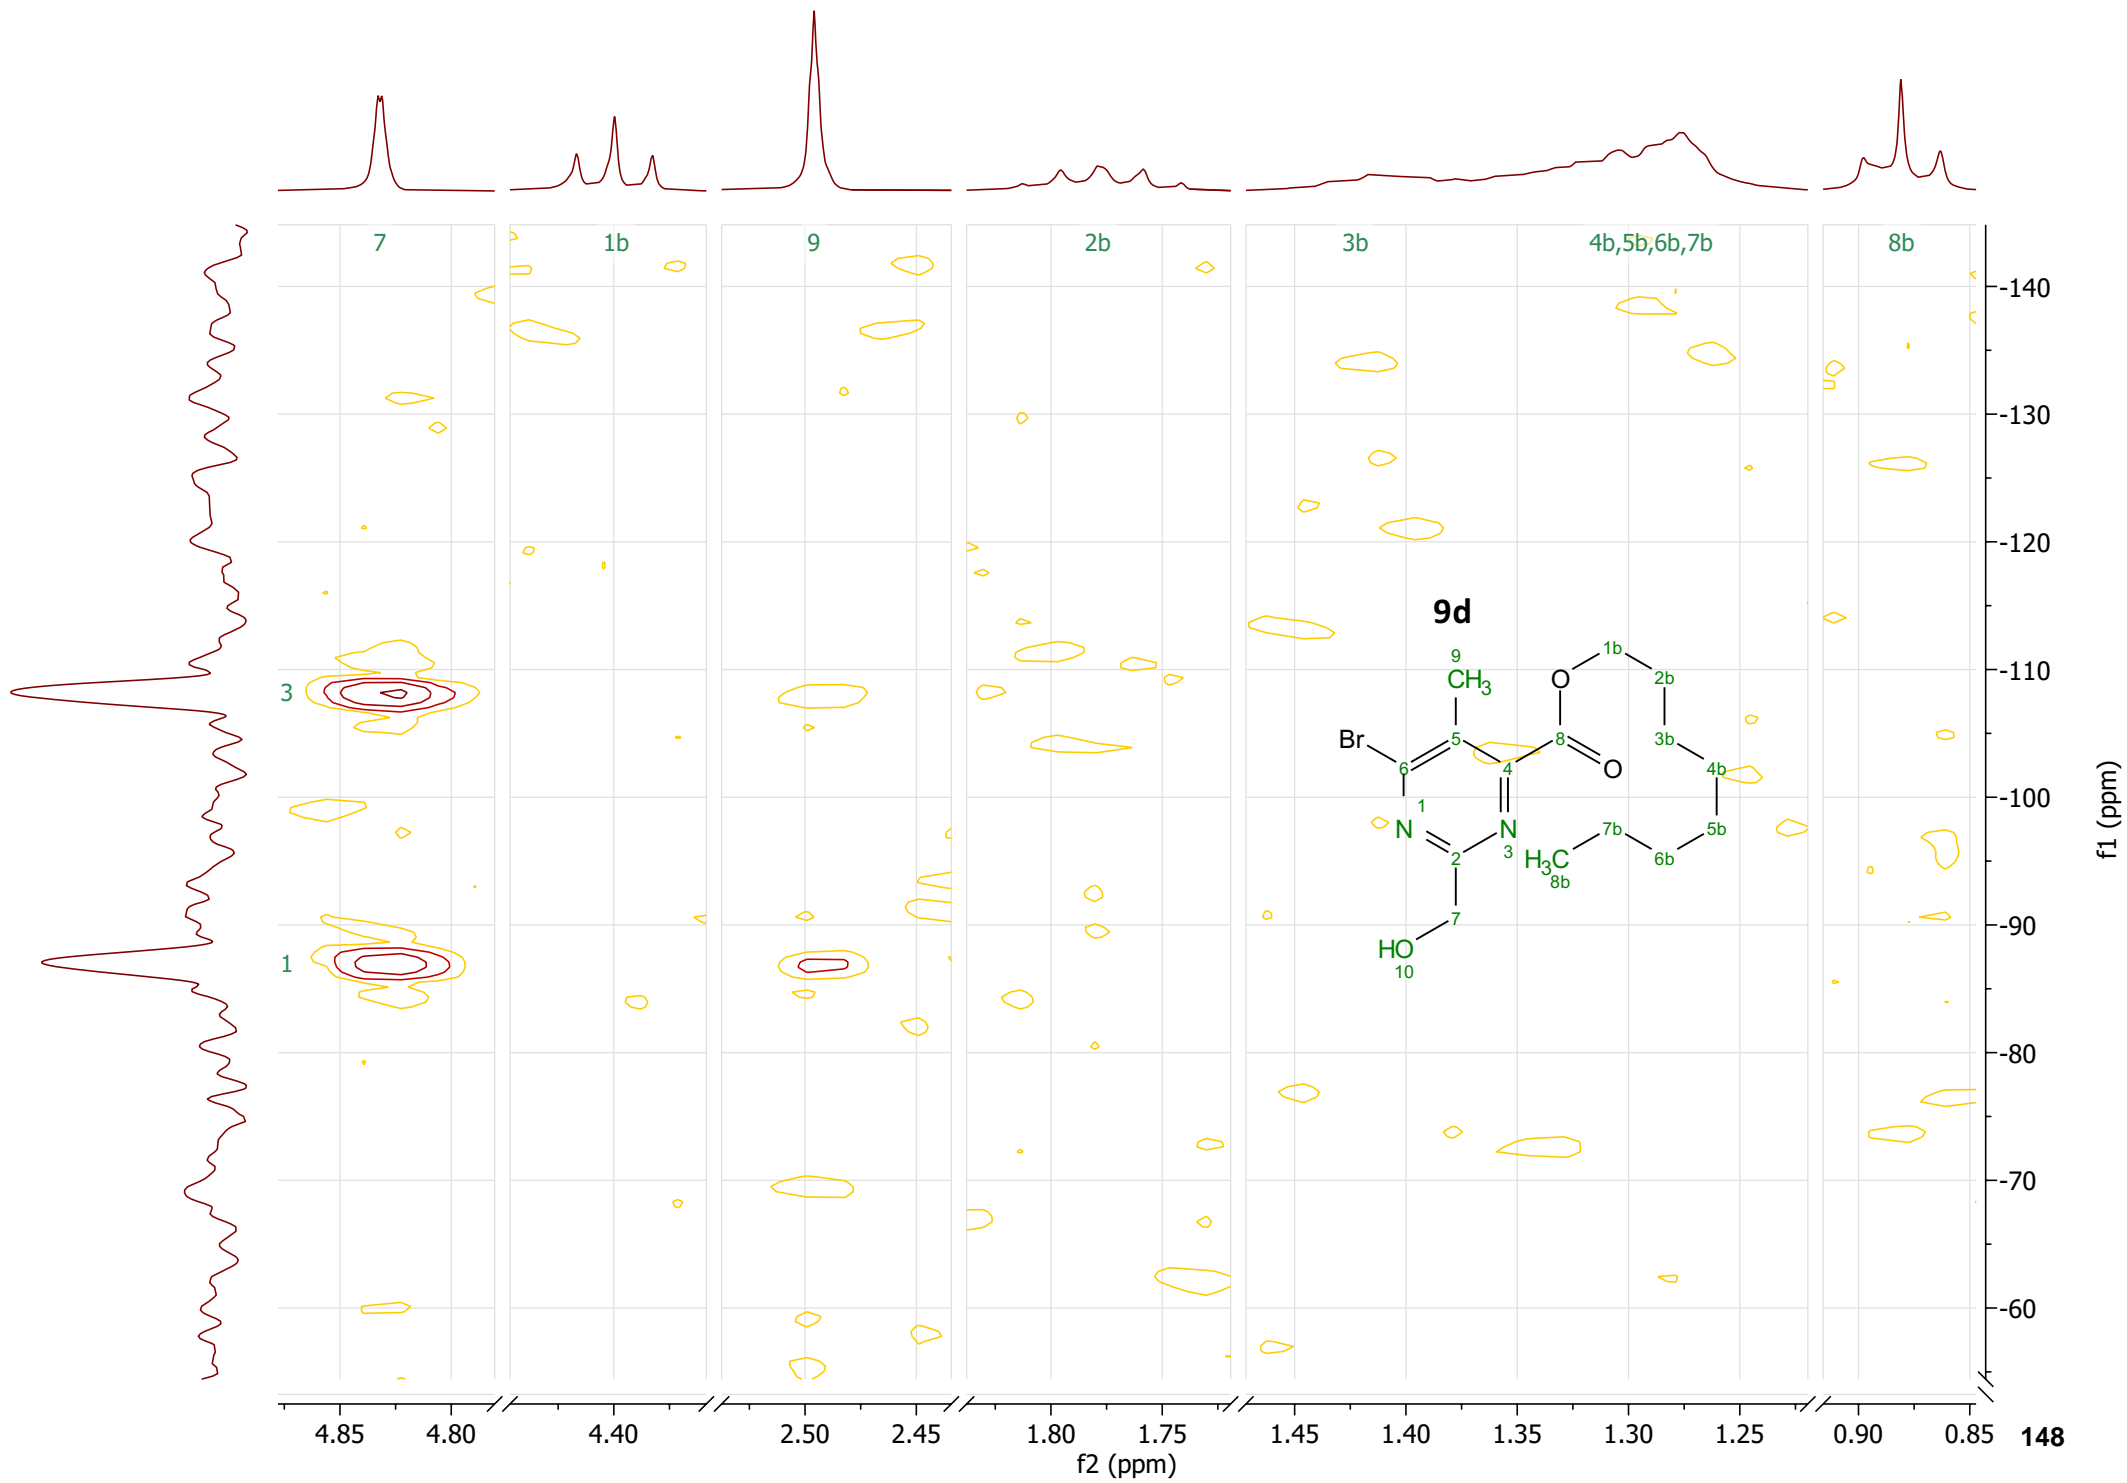

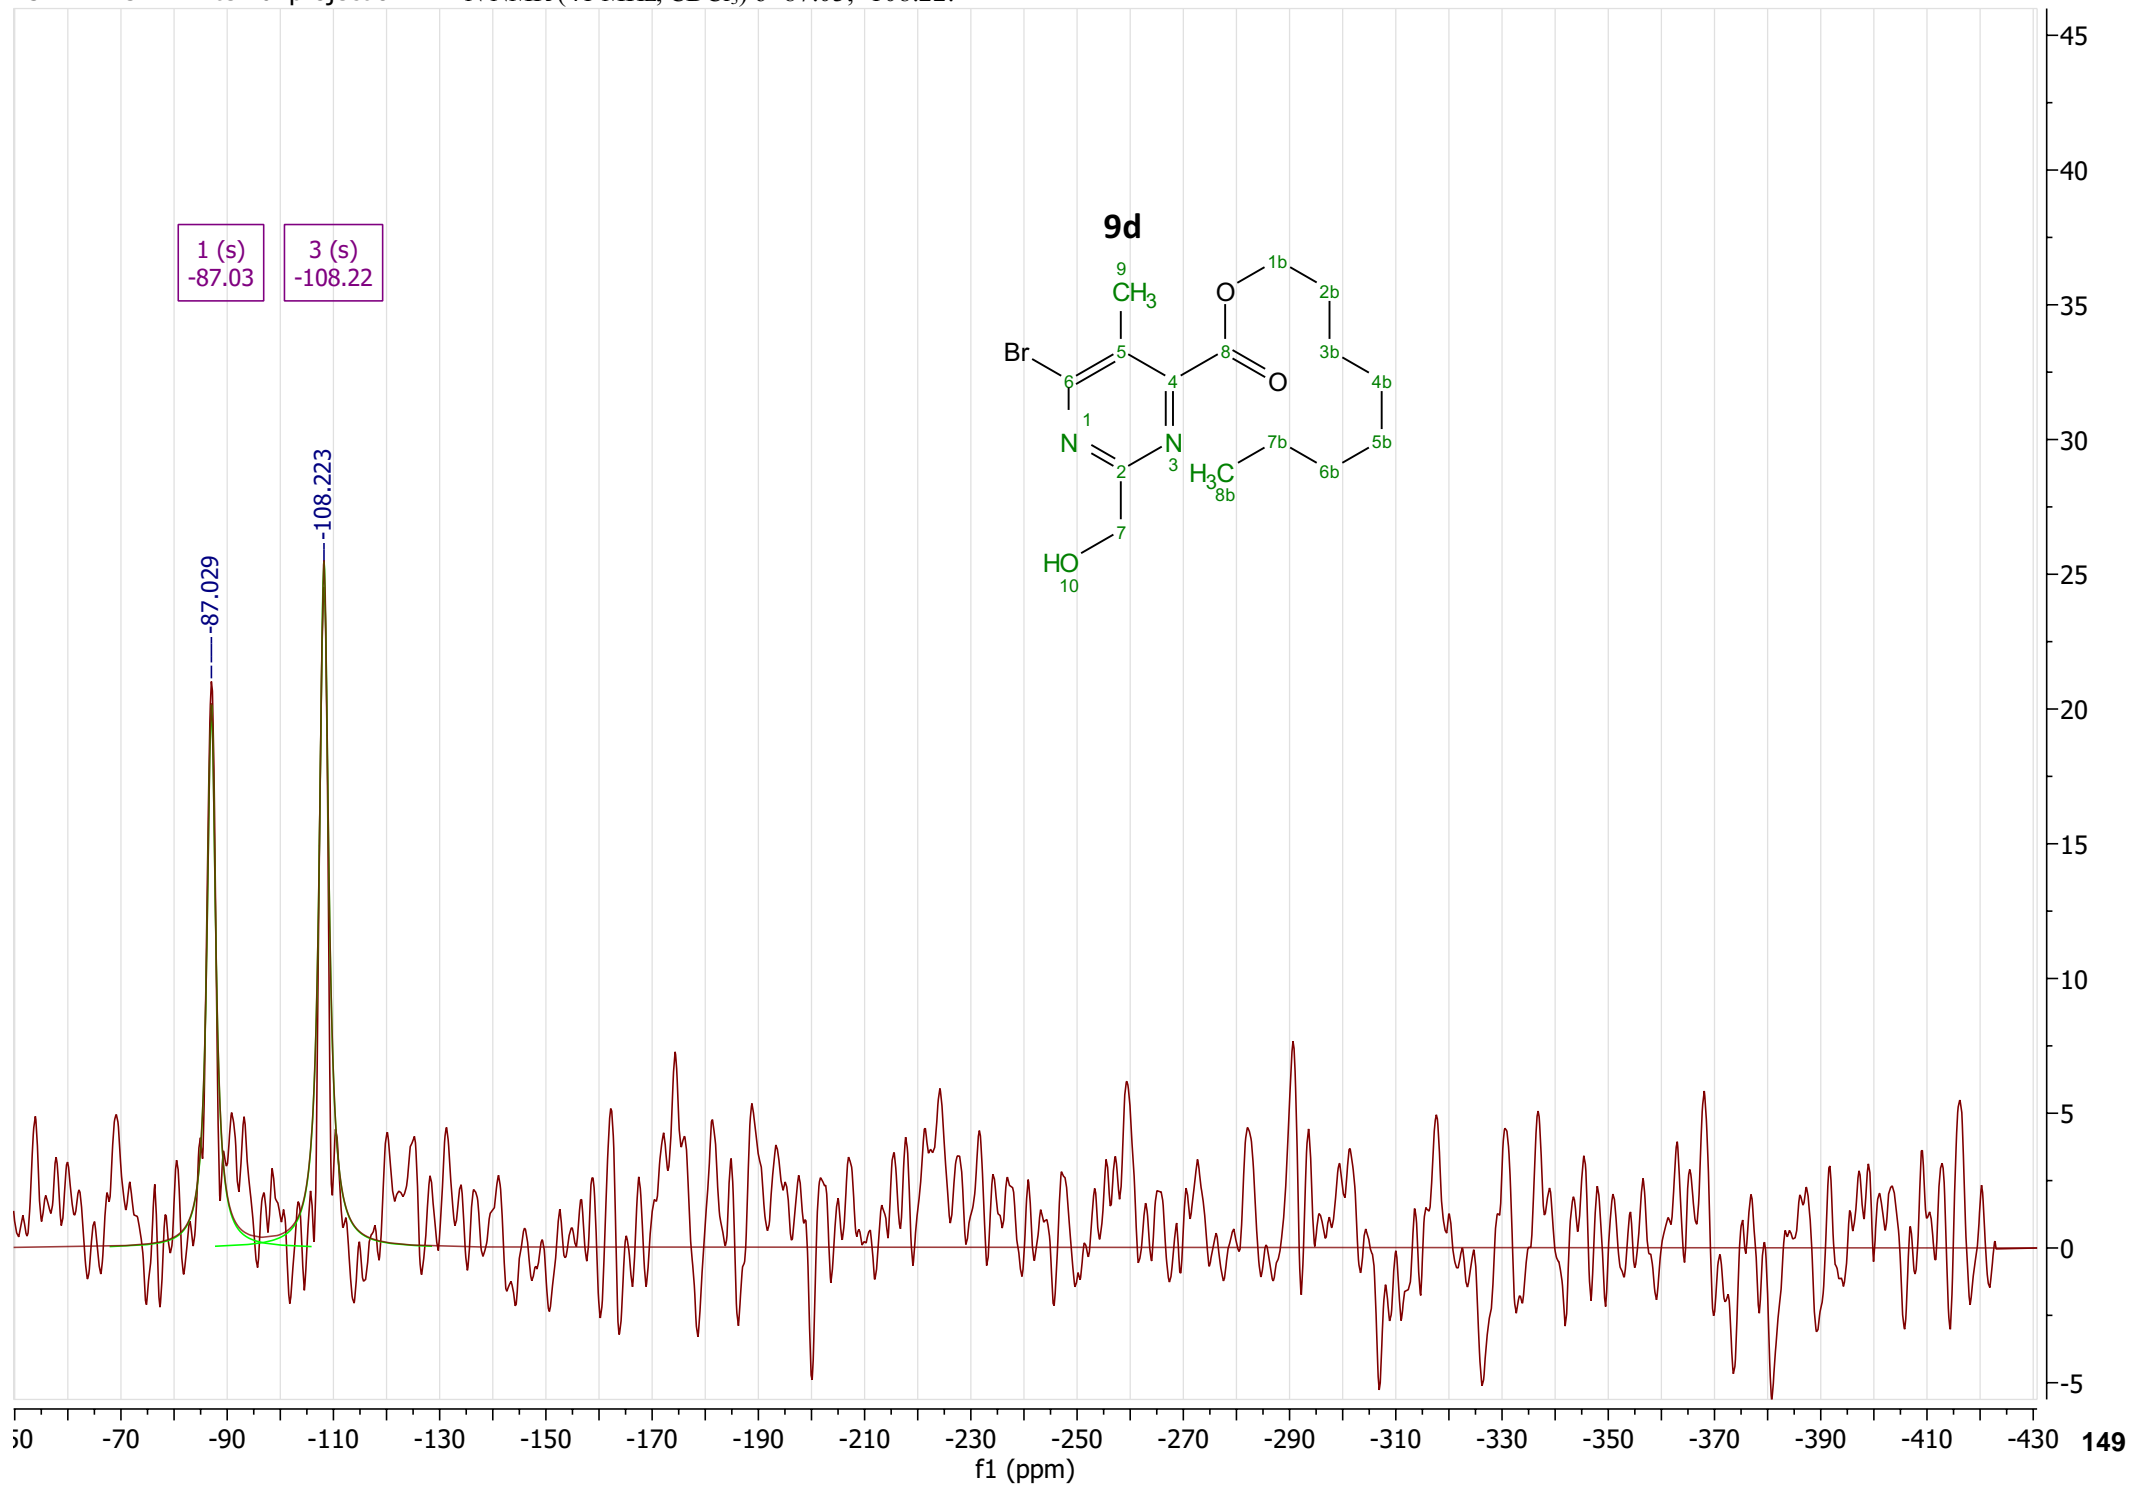

$^1\text{H}$  NMR (400 MHz,  $\text{CDCl}_3$ )  $\delta$  4.82 (d,  $J = 4.9$  Hz, 2H), 4.39 (t,  $J = 6.8$  Hz, 2H), 3.29 (t,  $J = 5.4$  Hz, 1H), 2.49 (app t,  $J = 0.8$  Hz, 3H), 1.82 – 1.72 (m, 2H), 1.46 – 1.37 (m, 2H), 1.36 – 1.19 (m, 10H), 0.87 (app t,  $J = 6.9$  Hz, 3H).

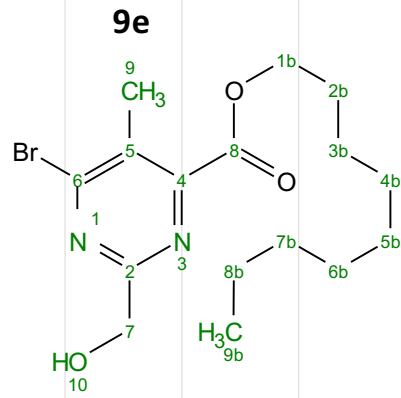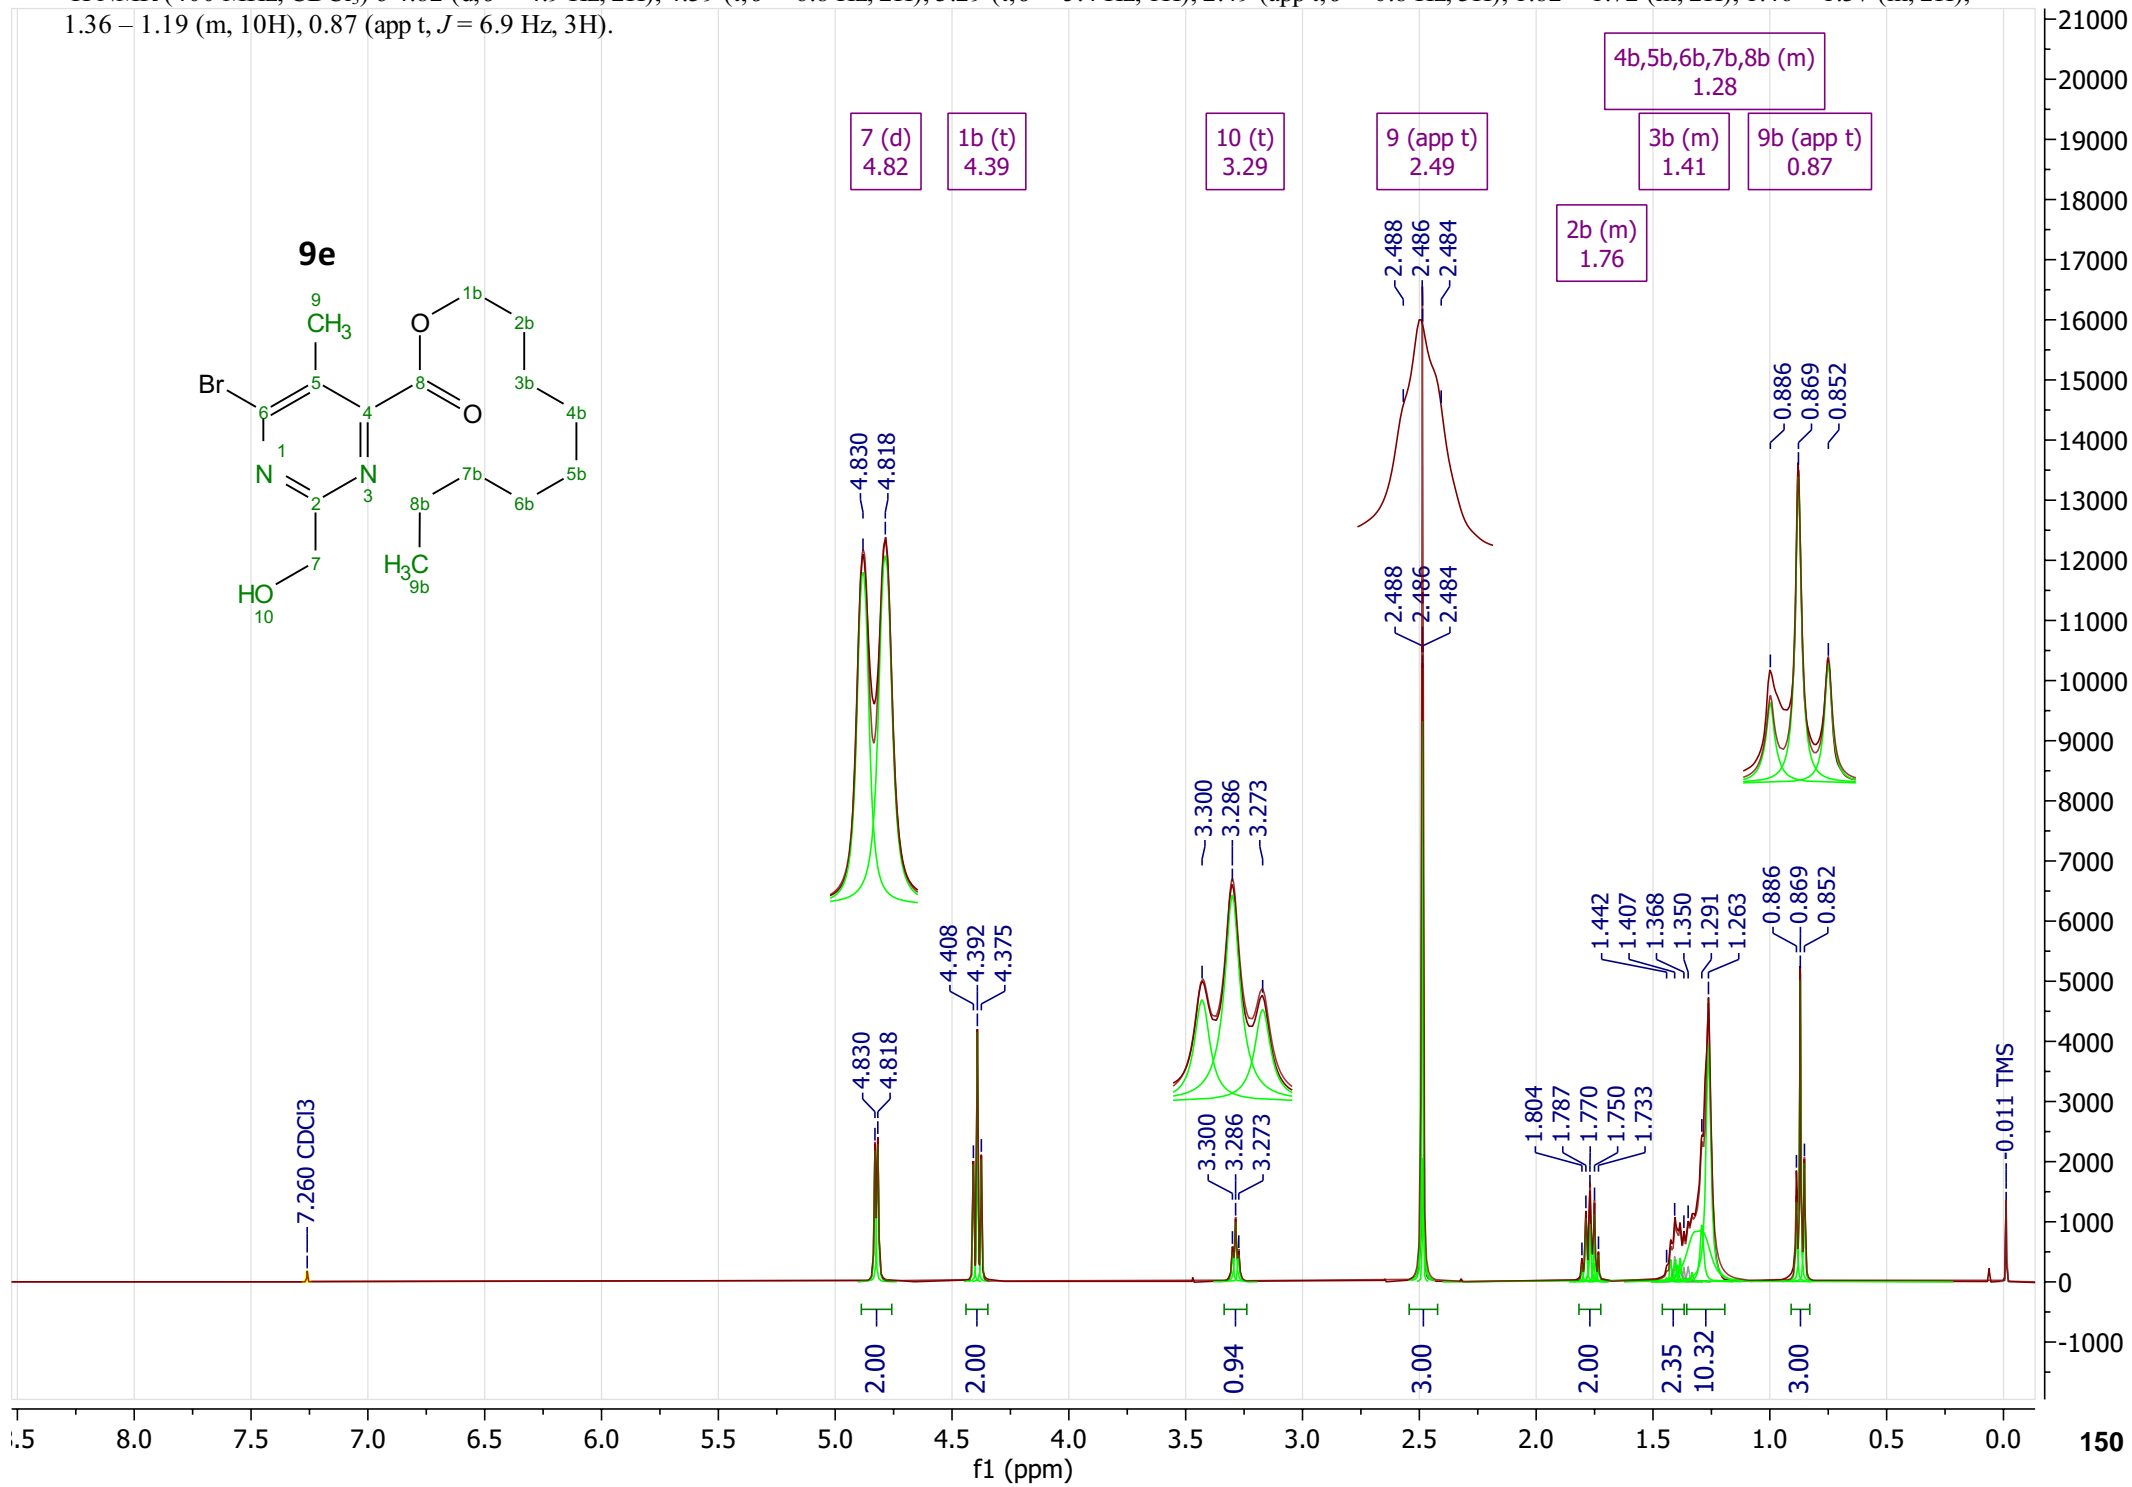

$^{13}\text{C}$  NMR (101 MHz,  $\text{CDCl}_3$ )  $\delta$  166.5, 164.6, 158.0, 156.6, 129.5, 67.0, 64.1, 32.0, 29.6, 29.33, 29.30, 28.6, 26.0, 22.8, 17.7, 14.2.

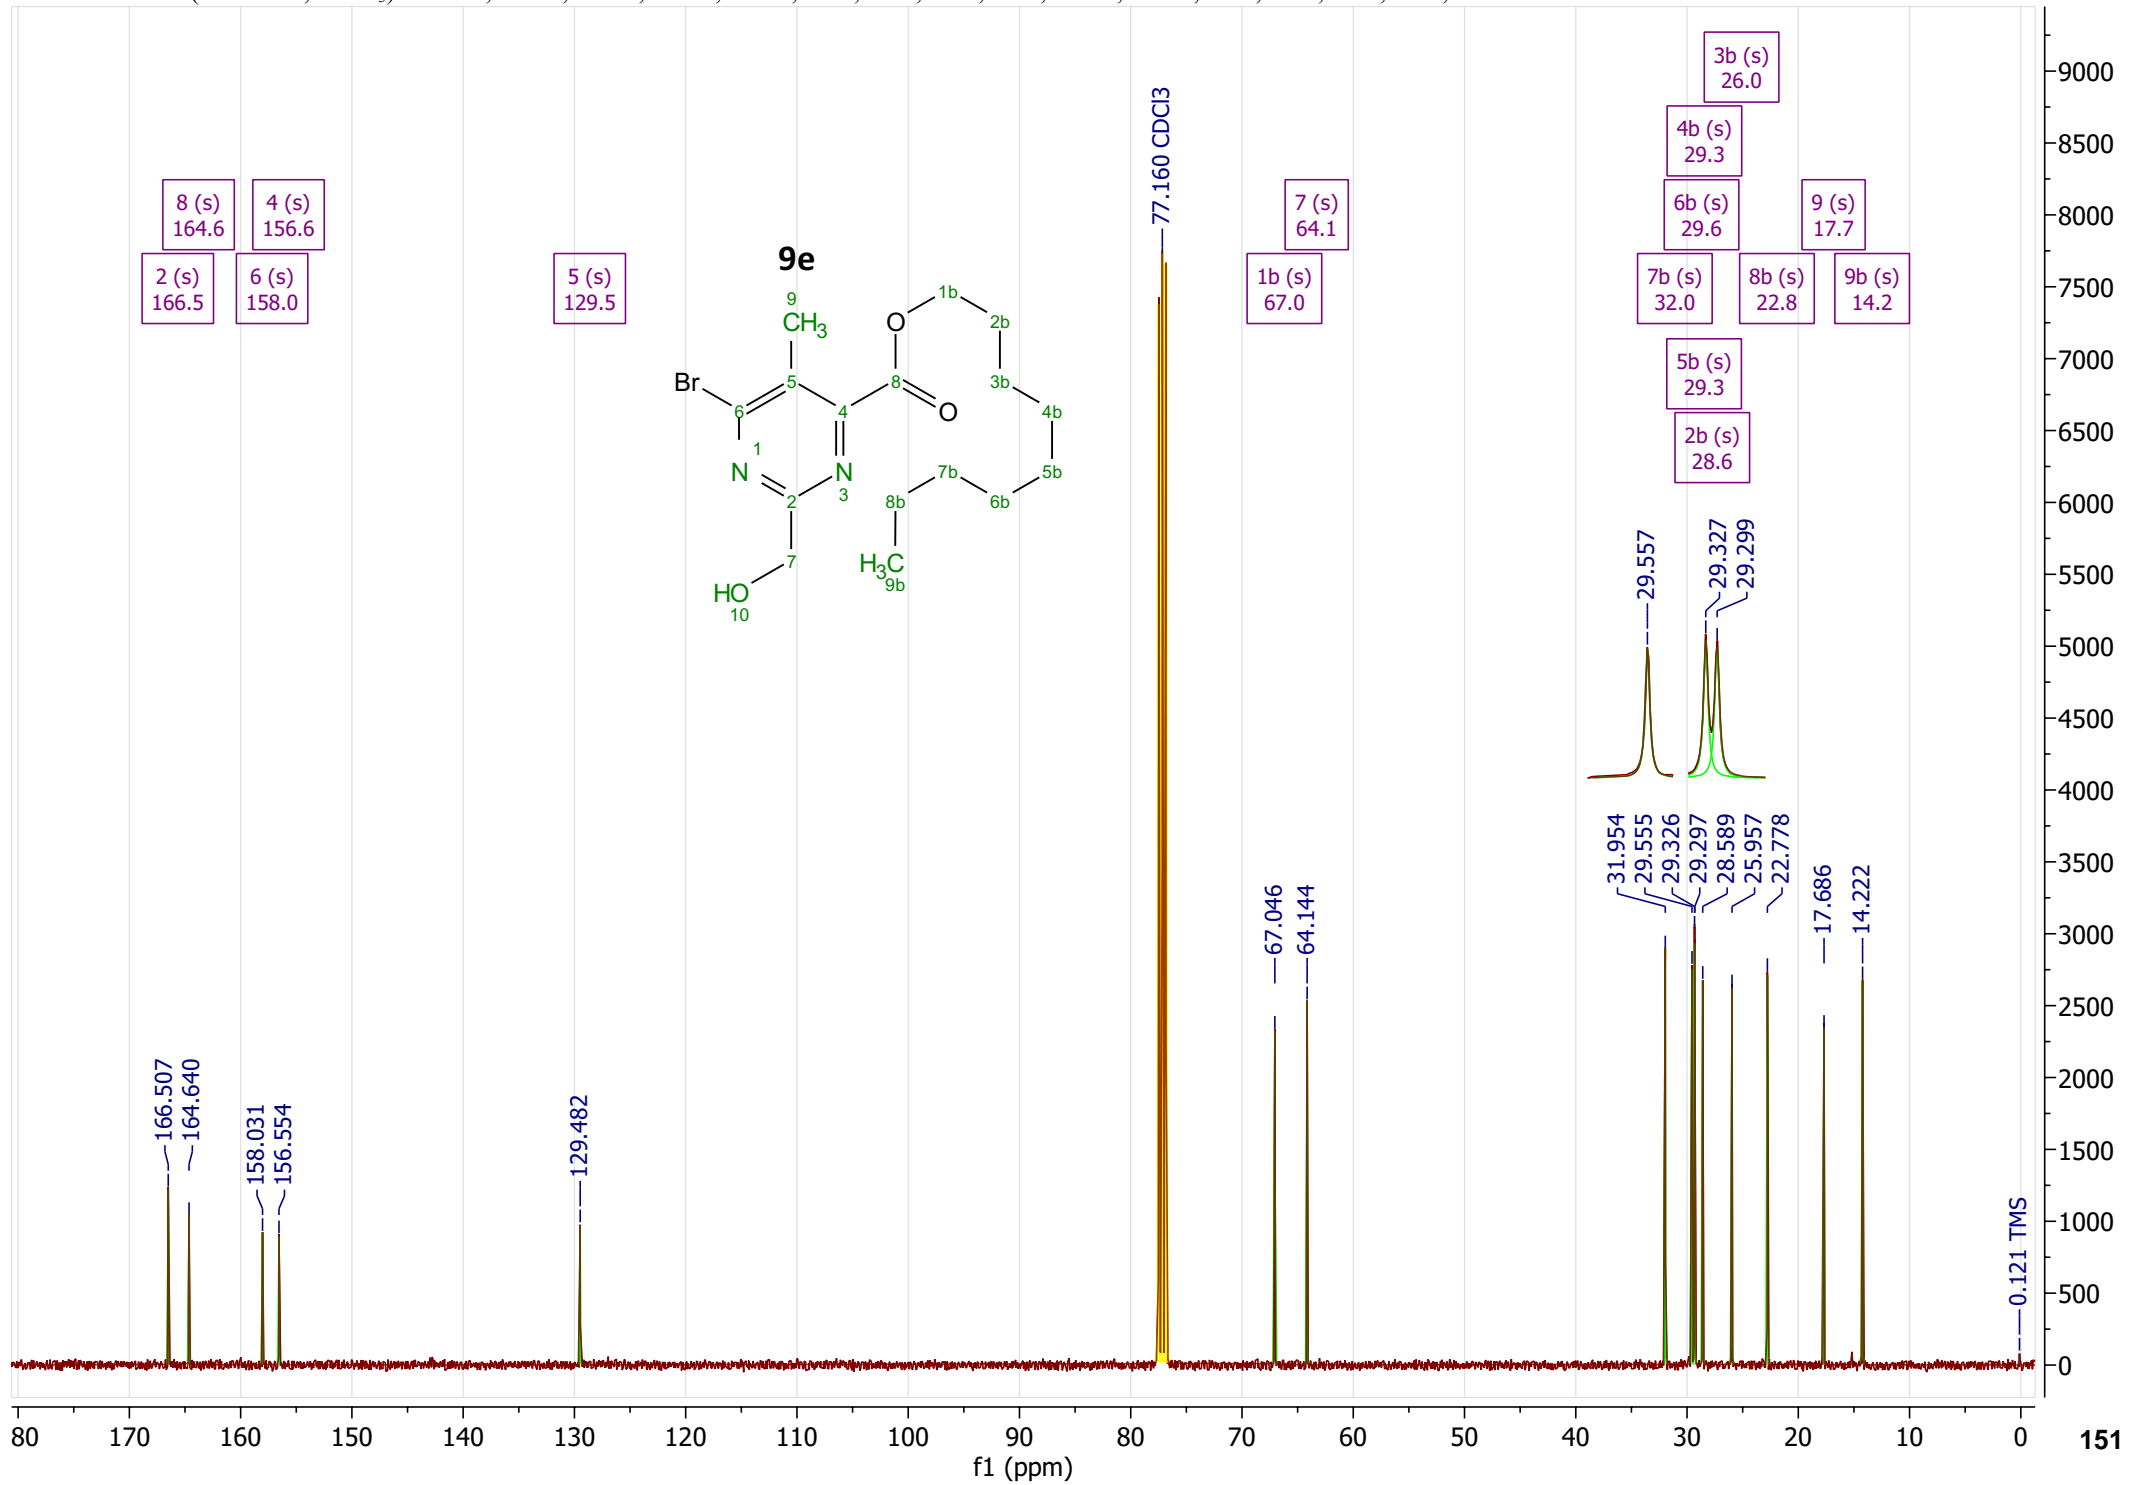

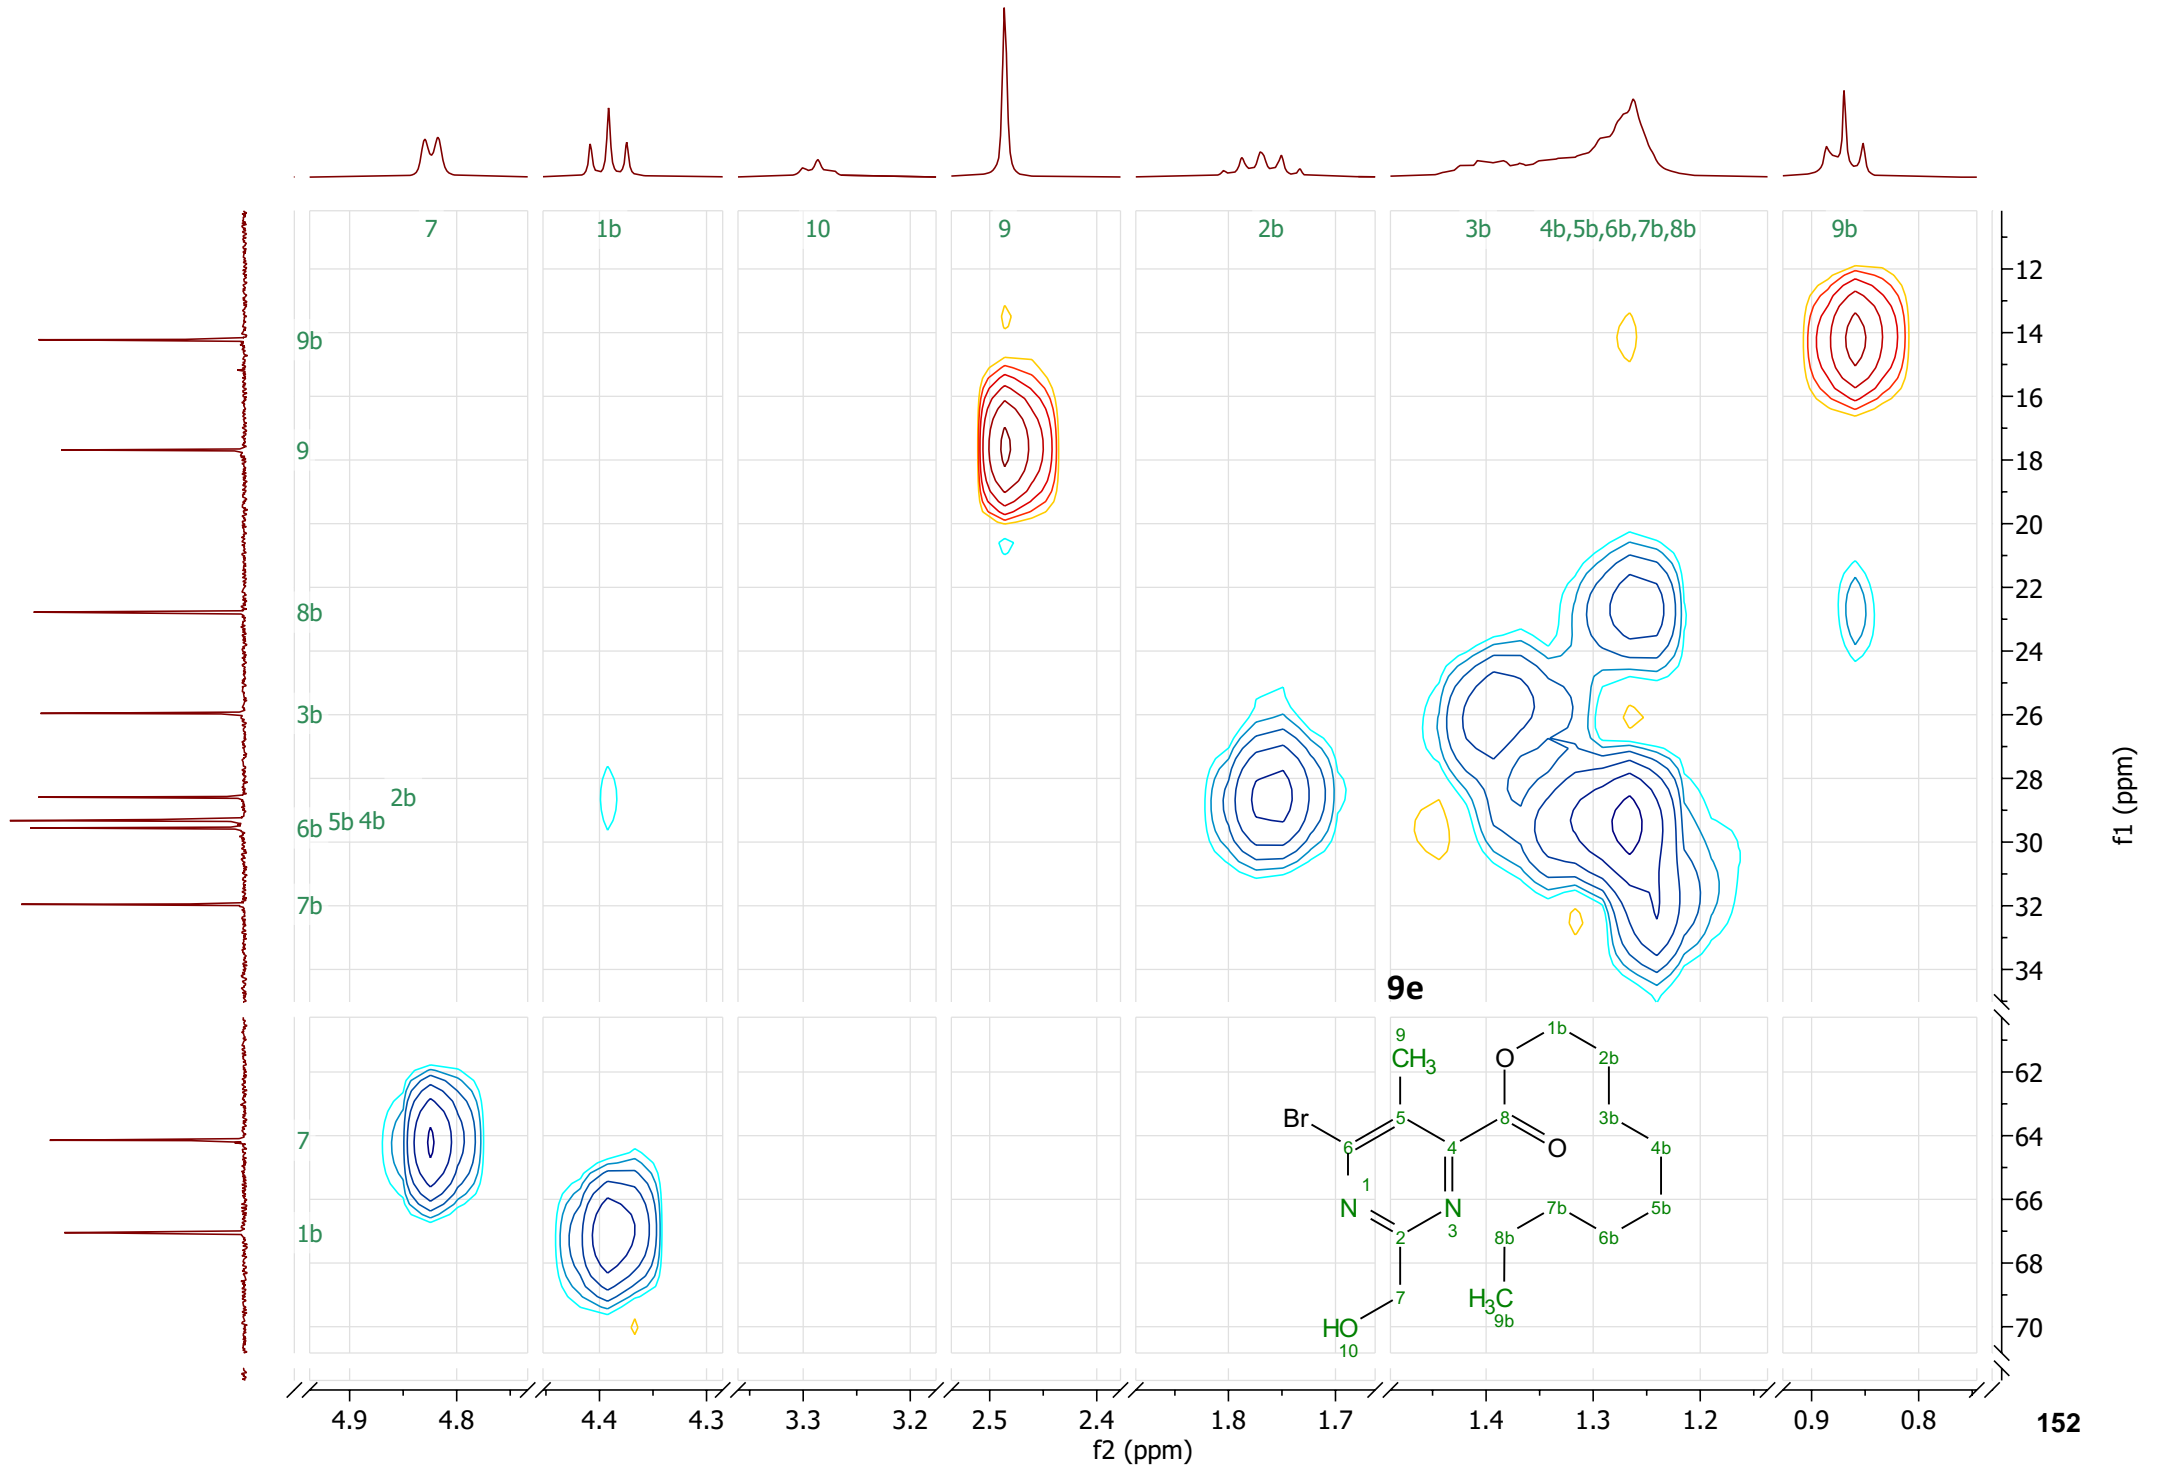



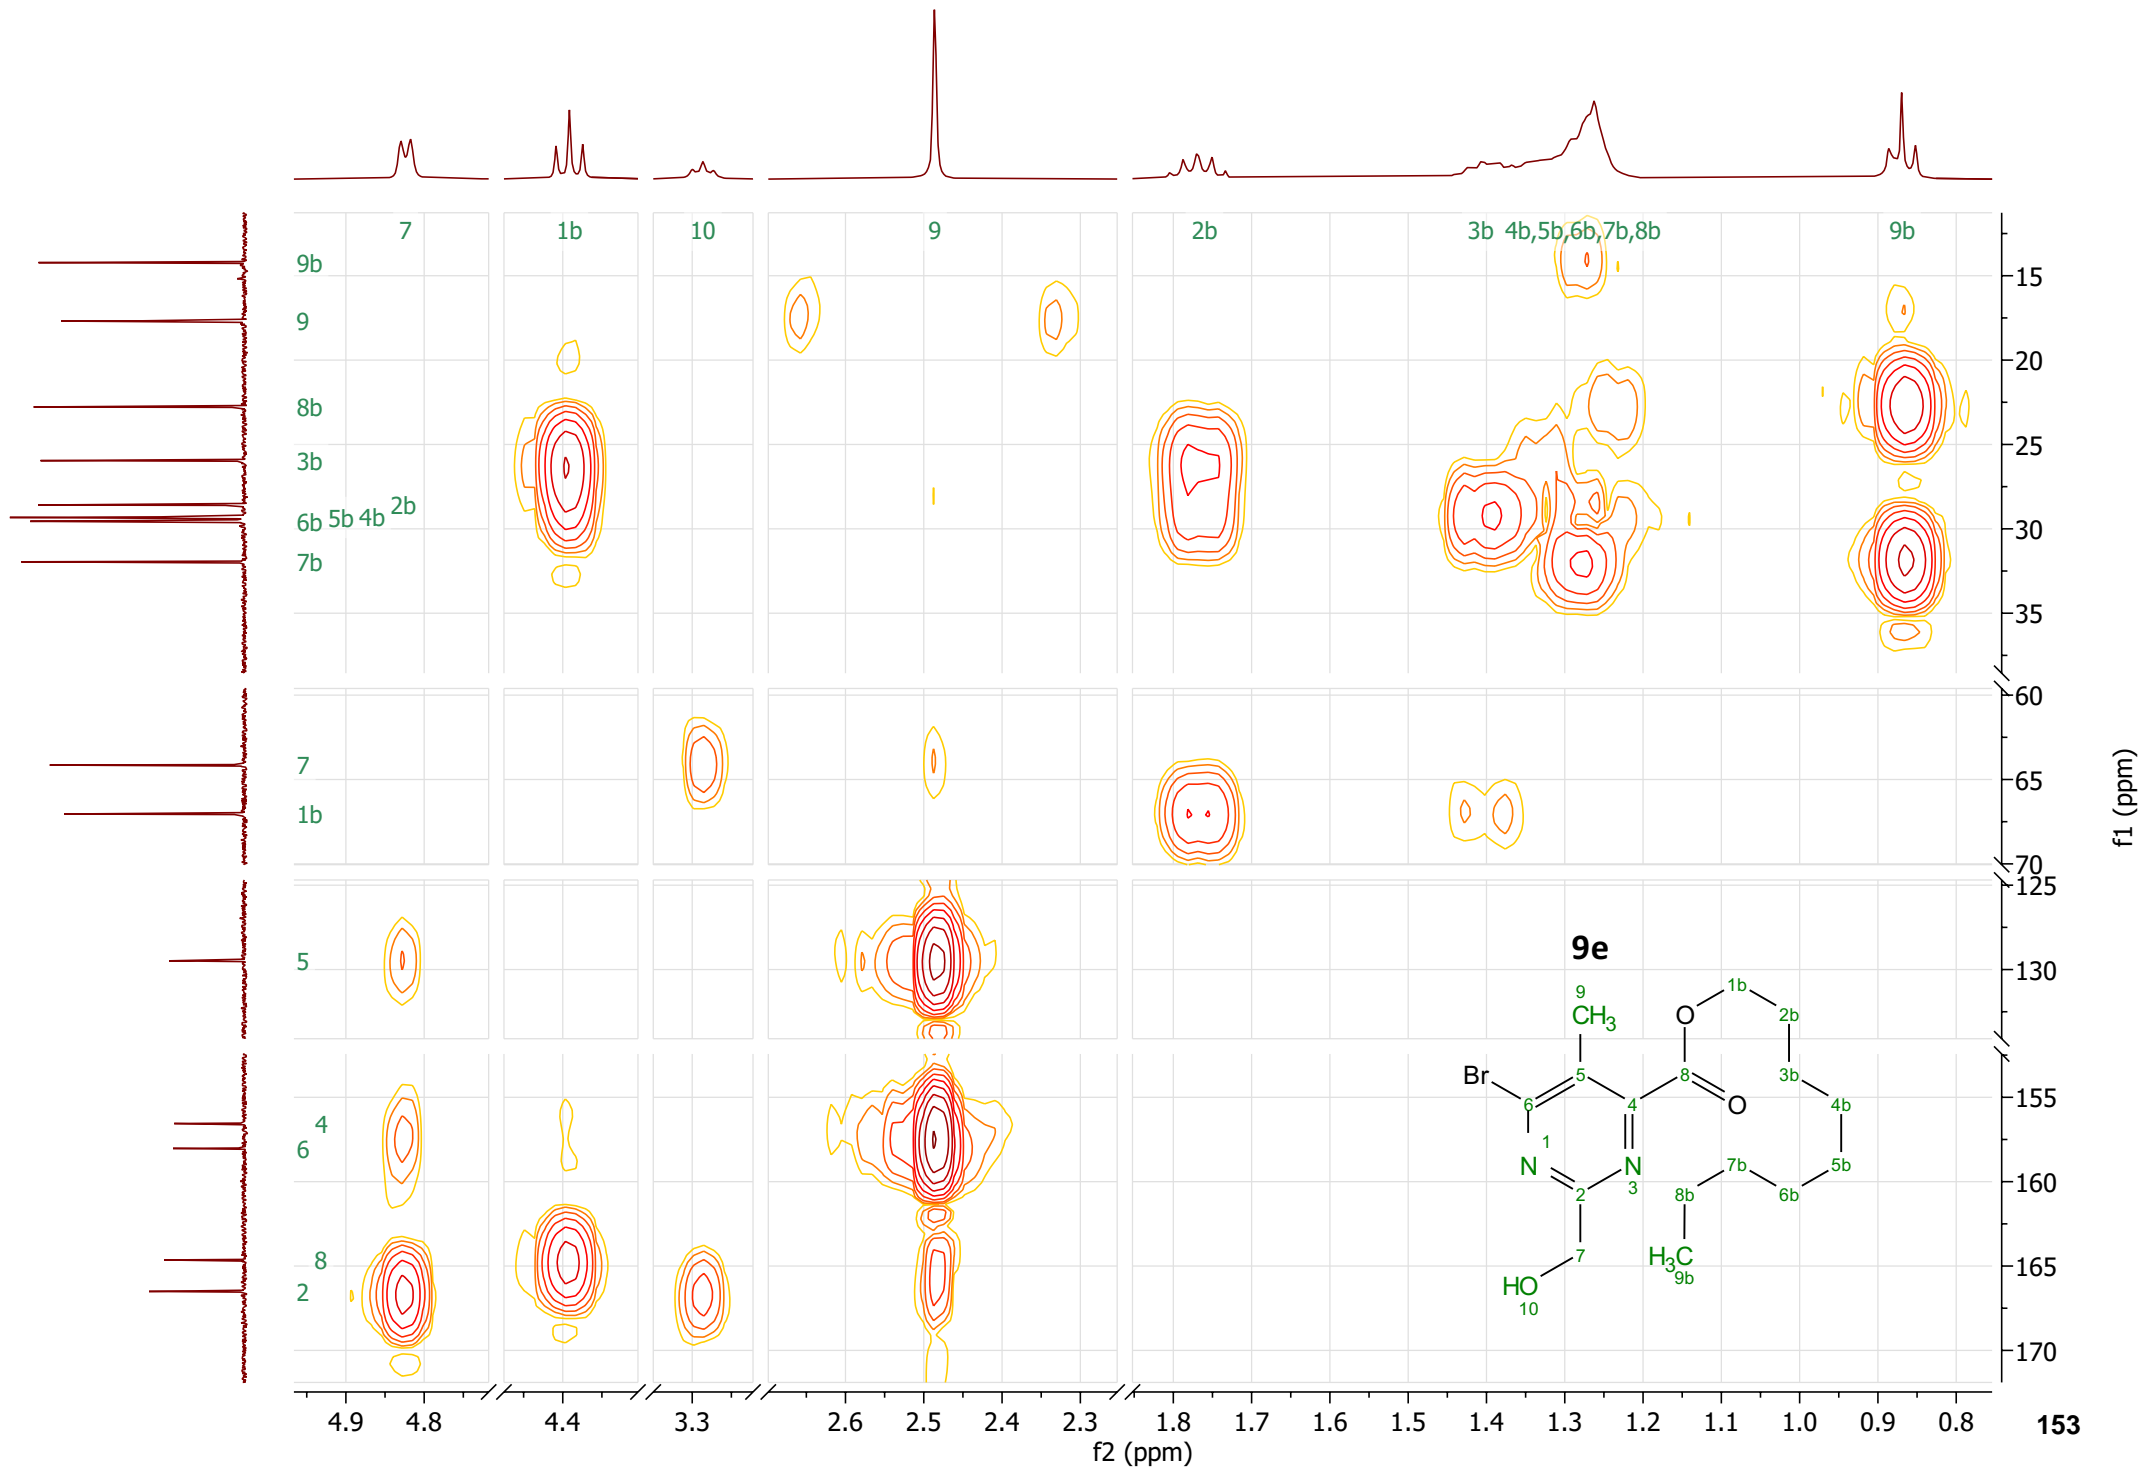

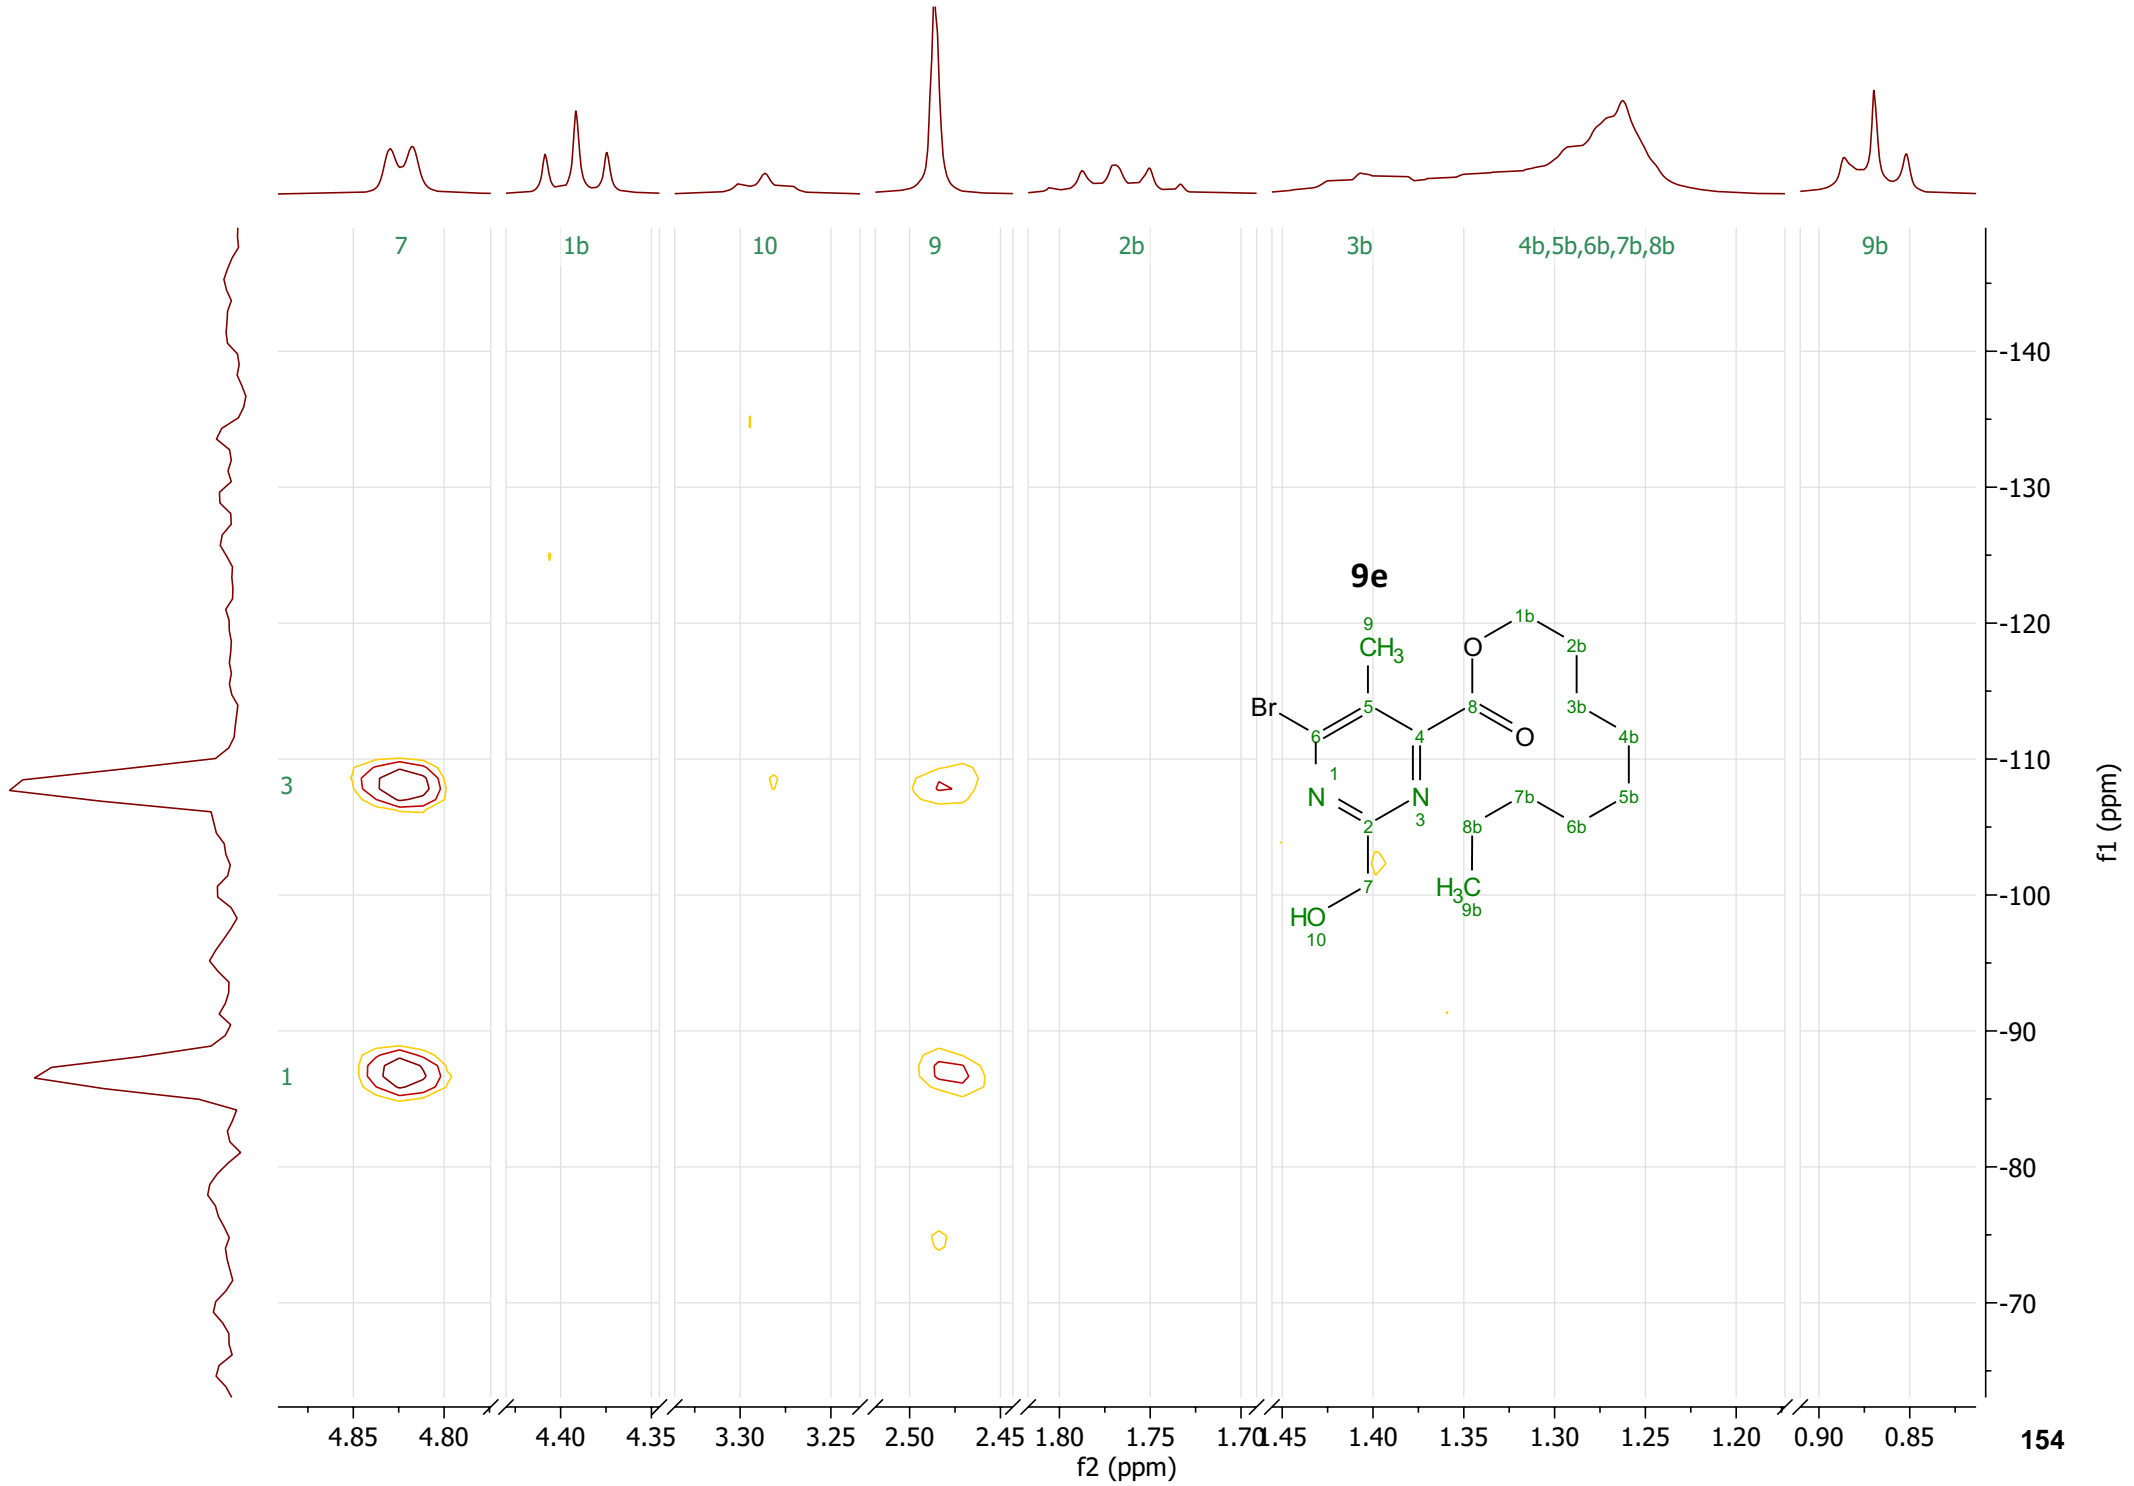

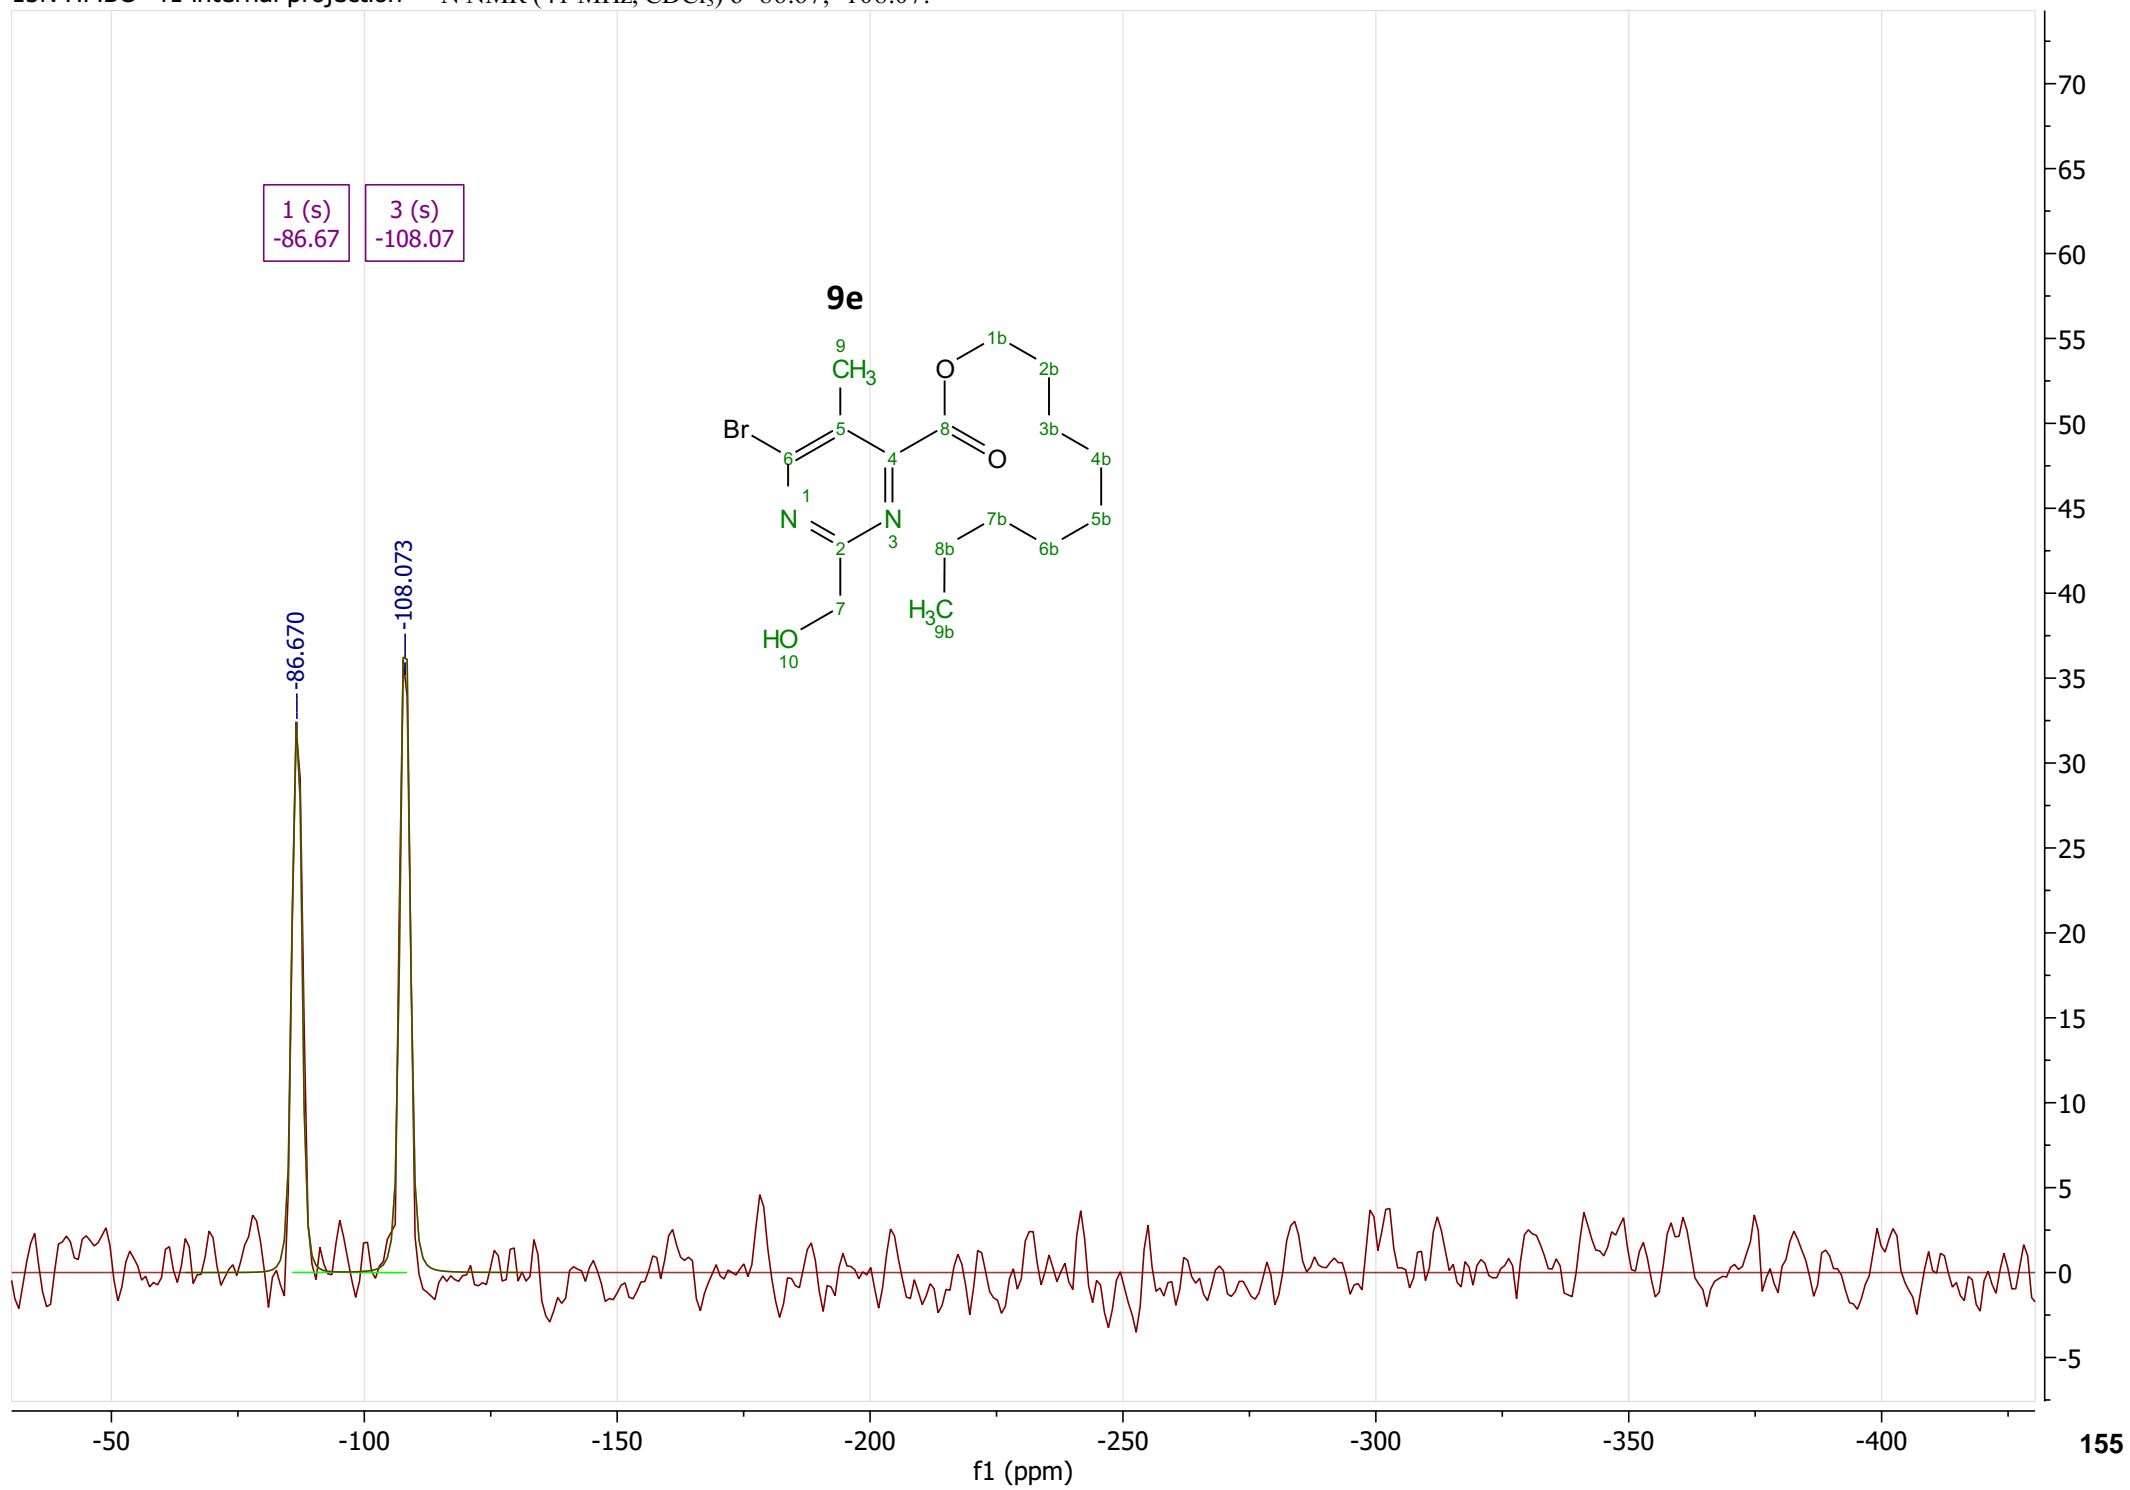

$^1\text{H}$  NMR (400 MHz,  $\text{CDCl}_3$ )  $\delta$  4.82 (app d,  $J = 0.8$  Hz, 2H), 4.47 (q,  $J = 7.1$  Hz, 2H), 3.30 (br s, 1H), 2.49 (app t,  $J = 0.8$  Hz, 3H), 1.42 (t,  $J = 7.1$  Hz, 3H).

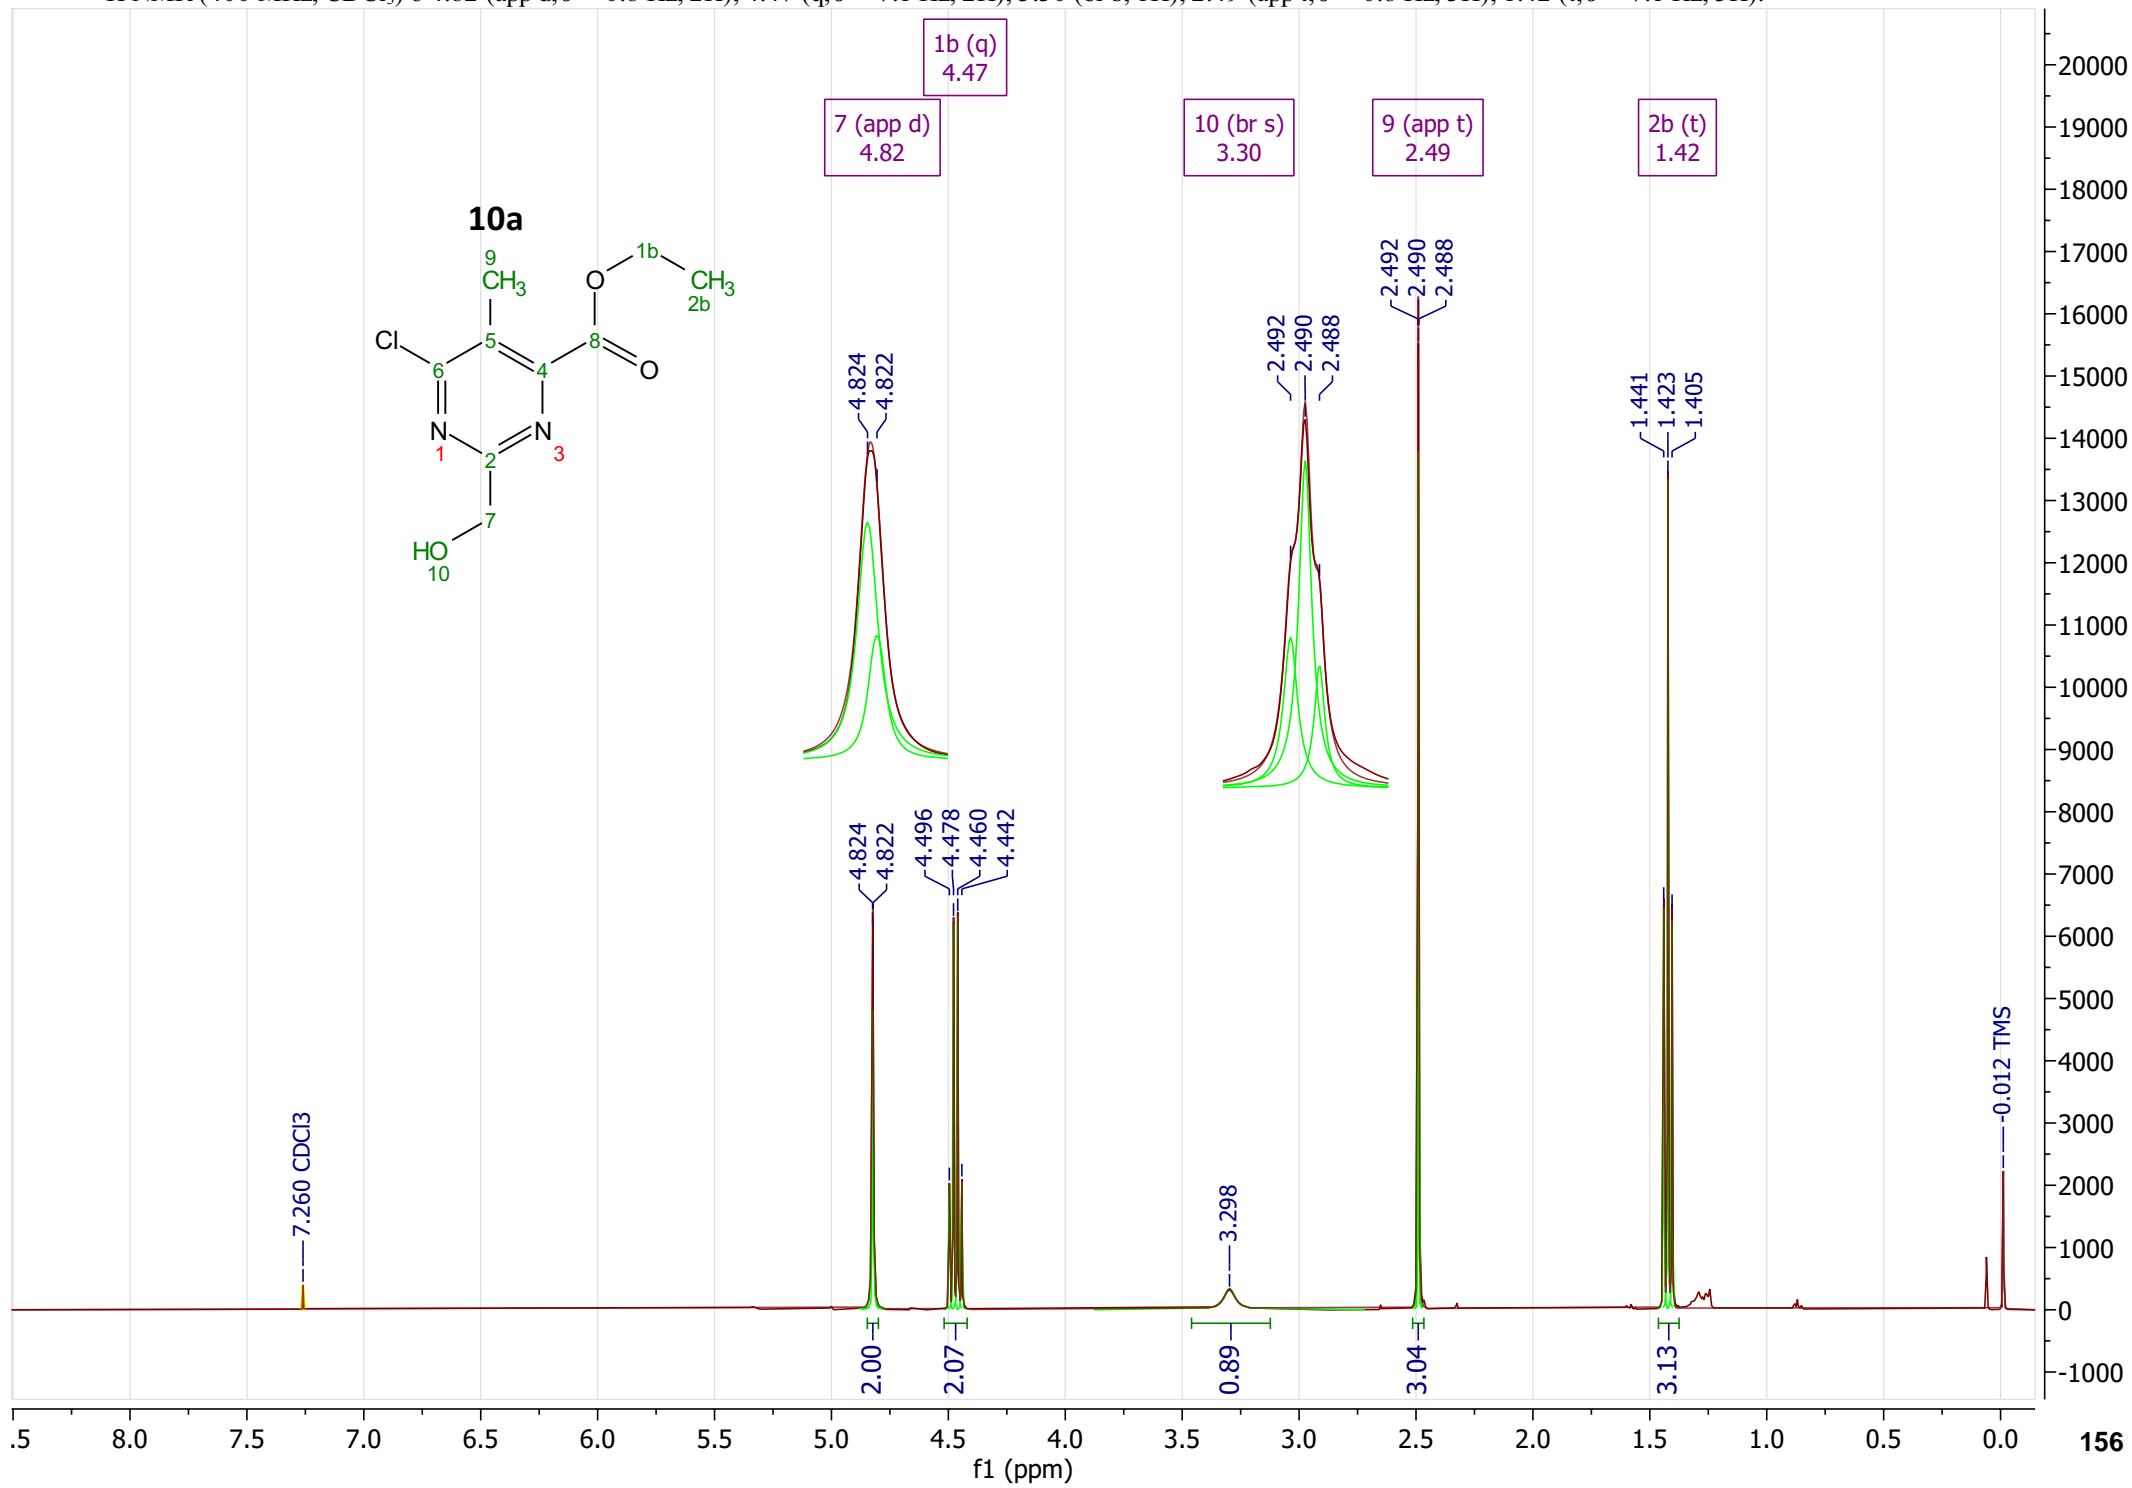

<sup>13</sup>C NMR (101 MHz, CDCl<sub>3</sub>) δ 166.5, 164.6, 163.9, 157.2, 127.1, 64.2, 62.9, 15.2, 14.2.

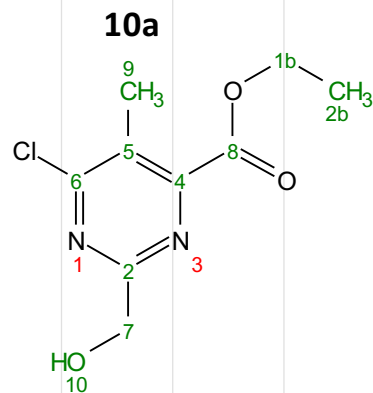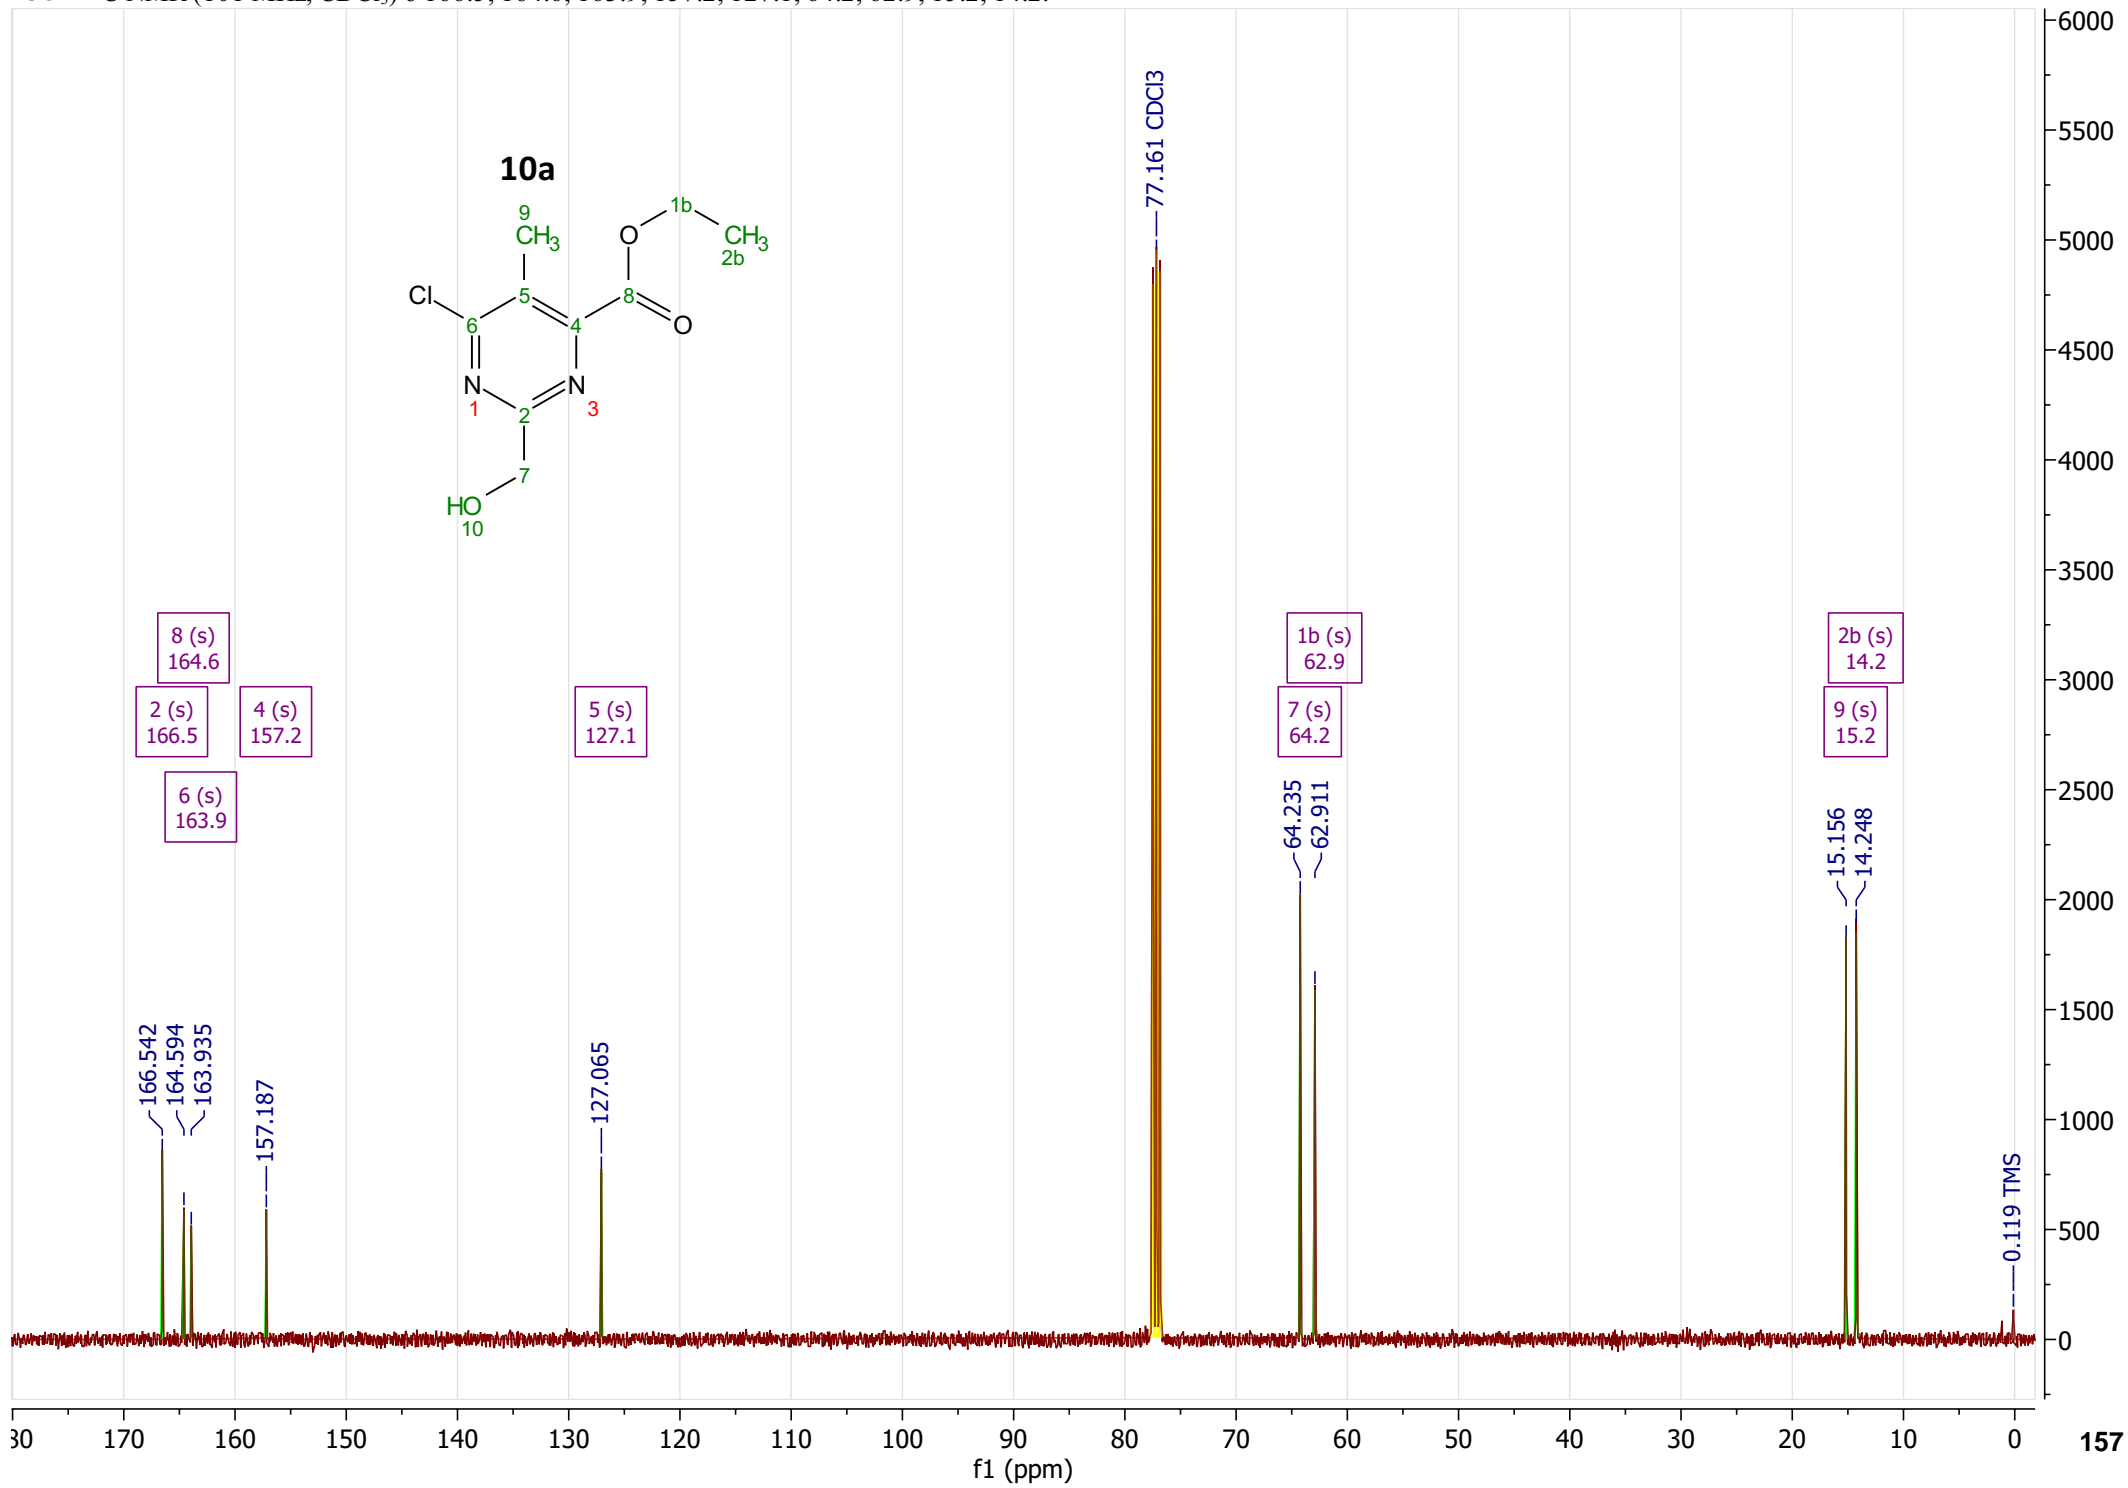

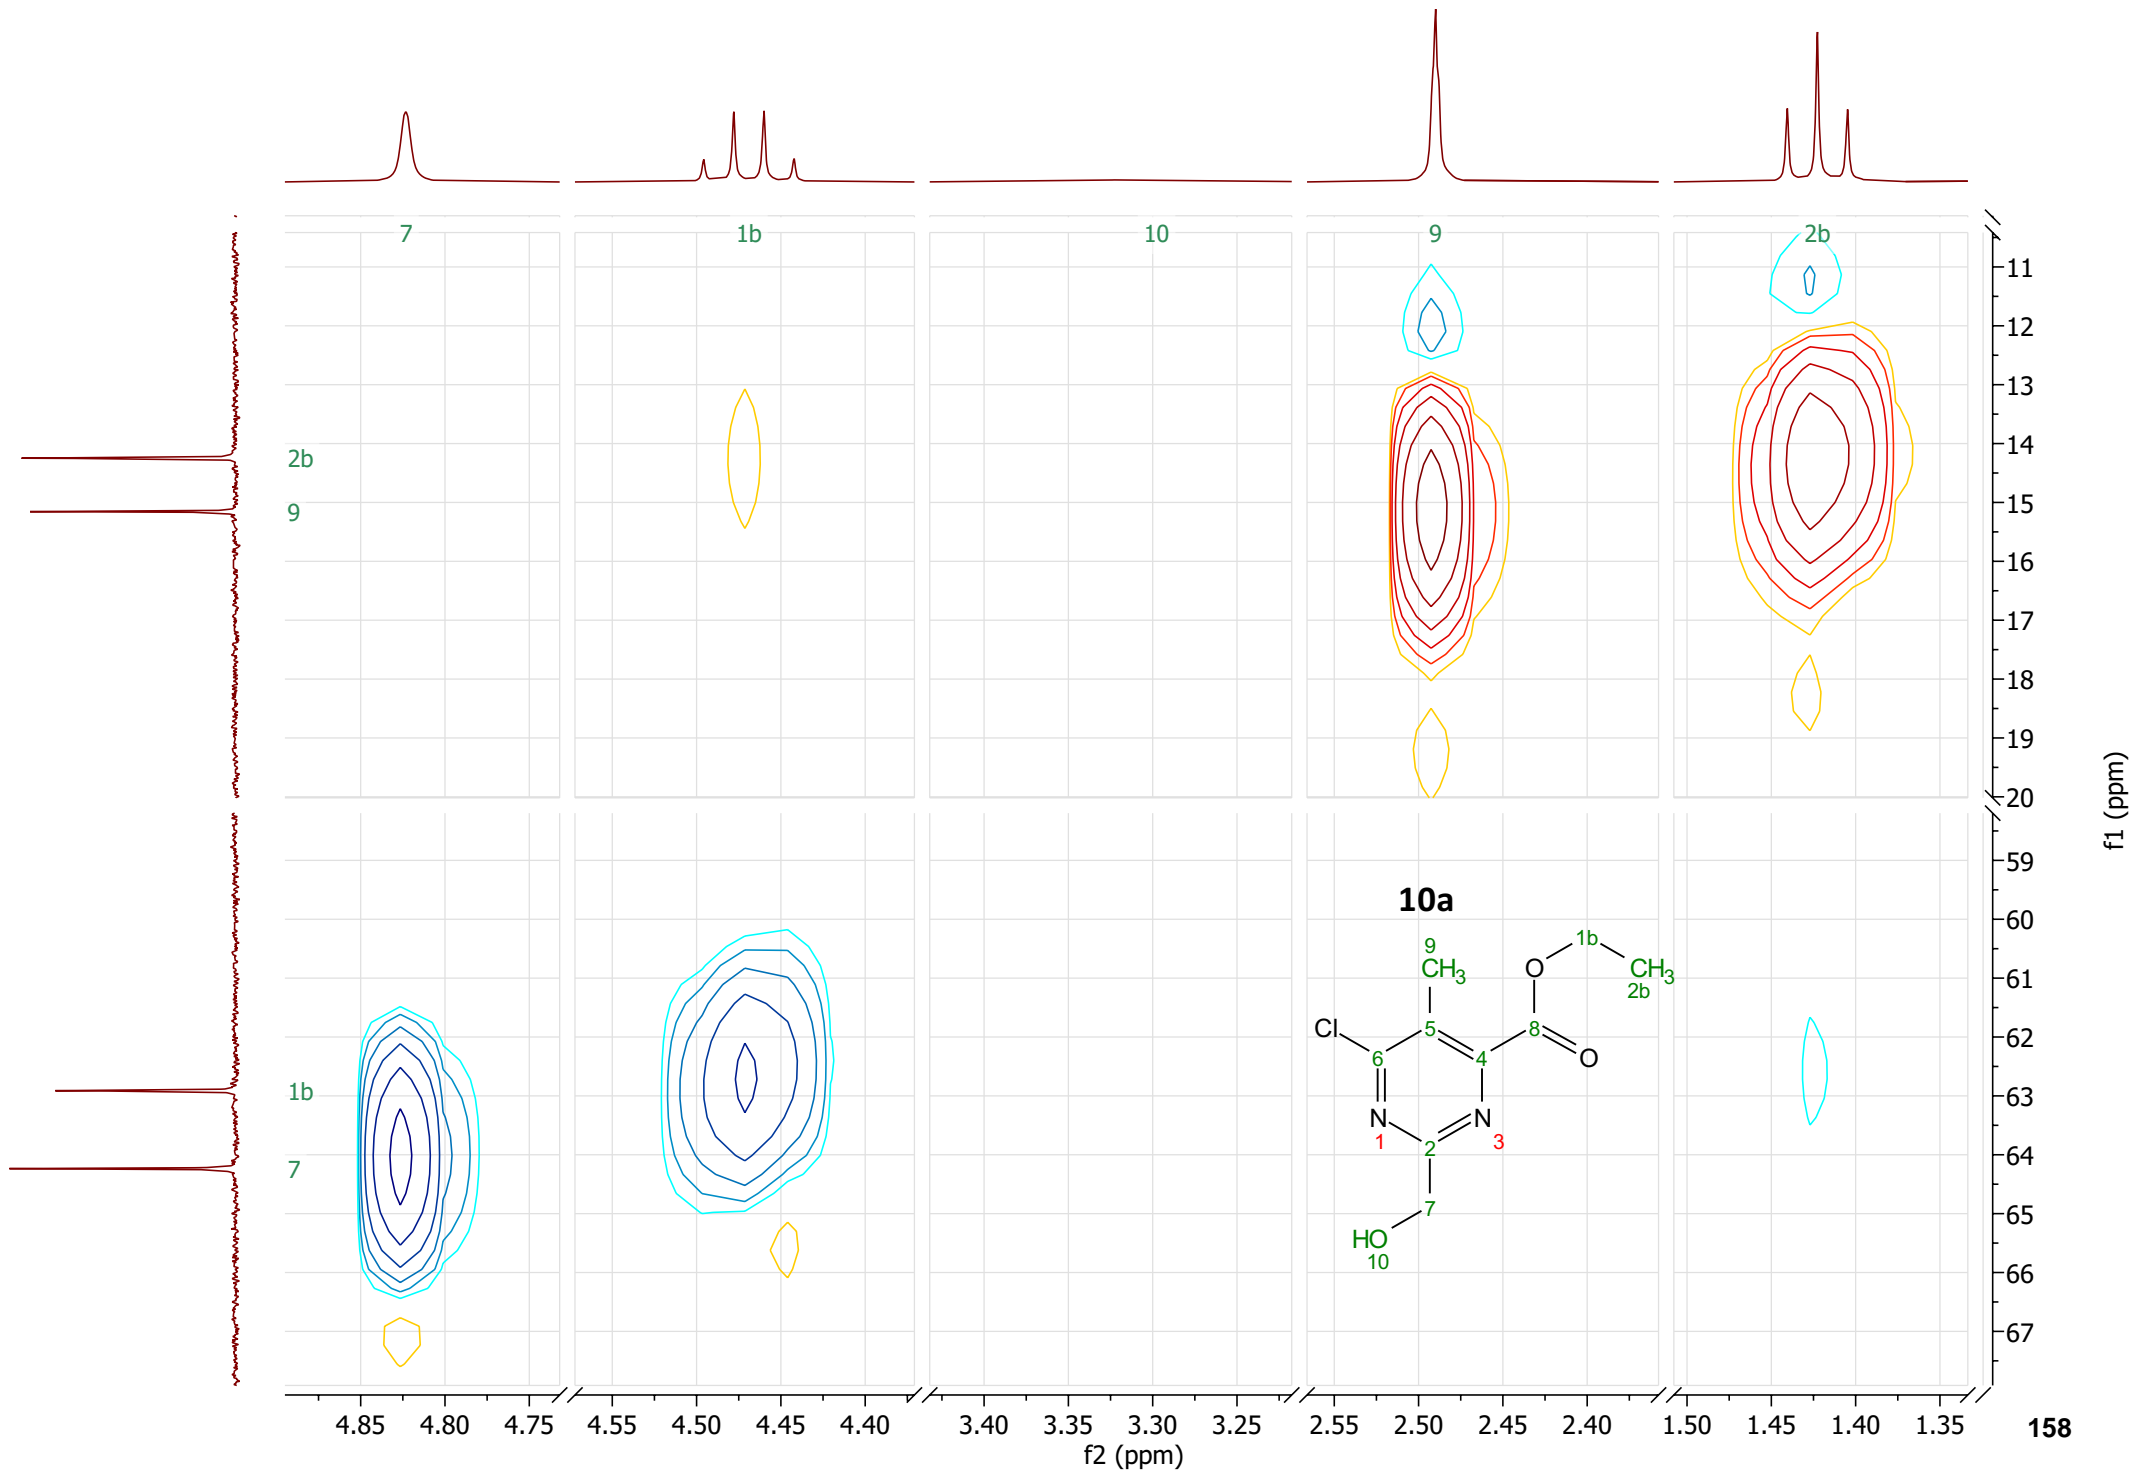

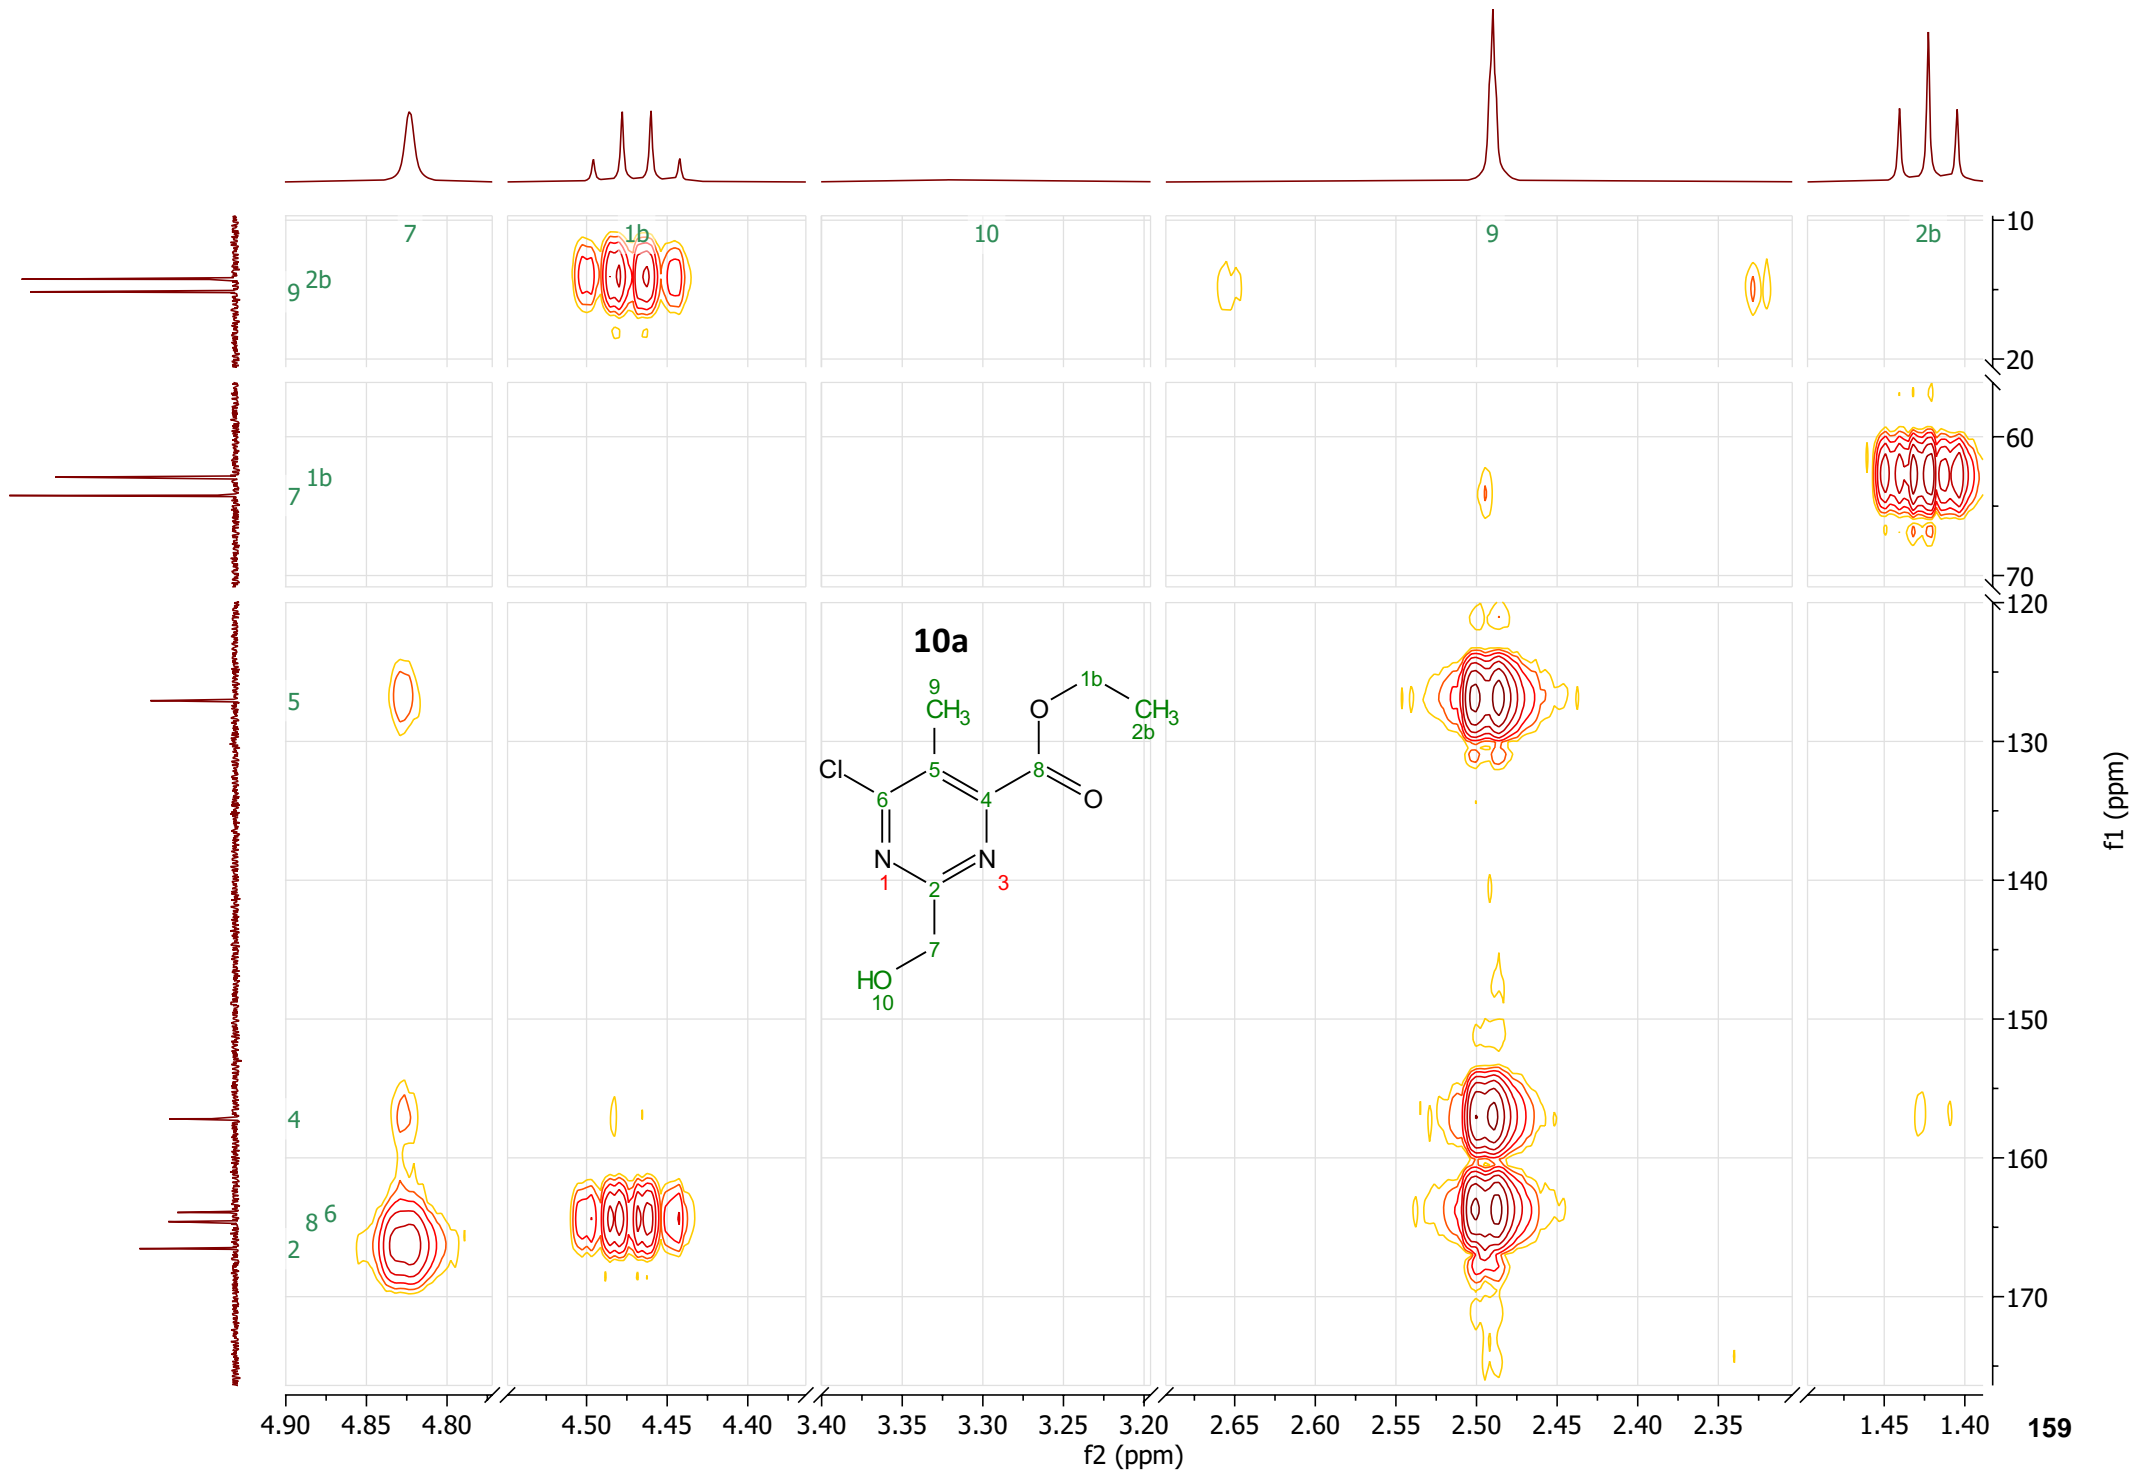

$^1\text{H}$  NMR (400 MHz,  $\text{CDCl}_3$ )  $\delta$  4.82 (app d,  $J = 0.8$  Hz, 2H), 4.41 (t,  $J = 6.7$  Hz, 2H), 3.28 (br s, 1H), 2.49 (app t,  $J = 0.8$  Hz, 3H), 1.83 – 1.71 (m, 2H), 1.52 – 1.39 (m, 2H), 0.97 (t,  $J = 7.4$  Hz, 3H).

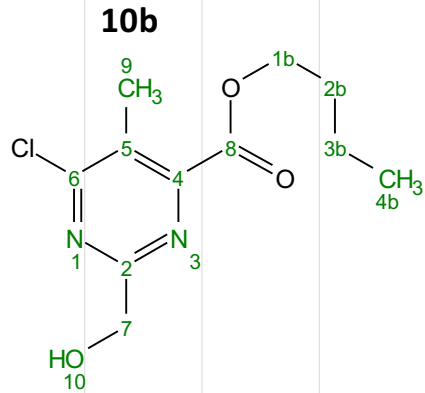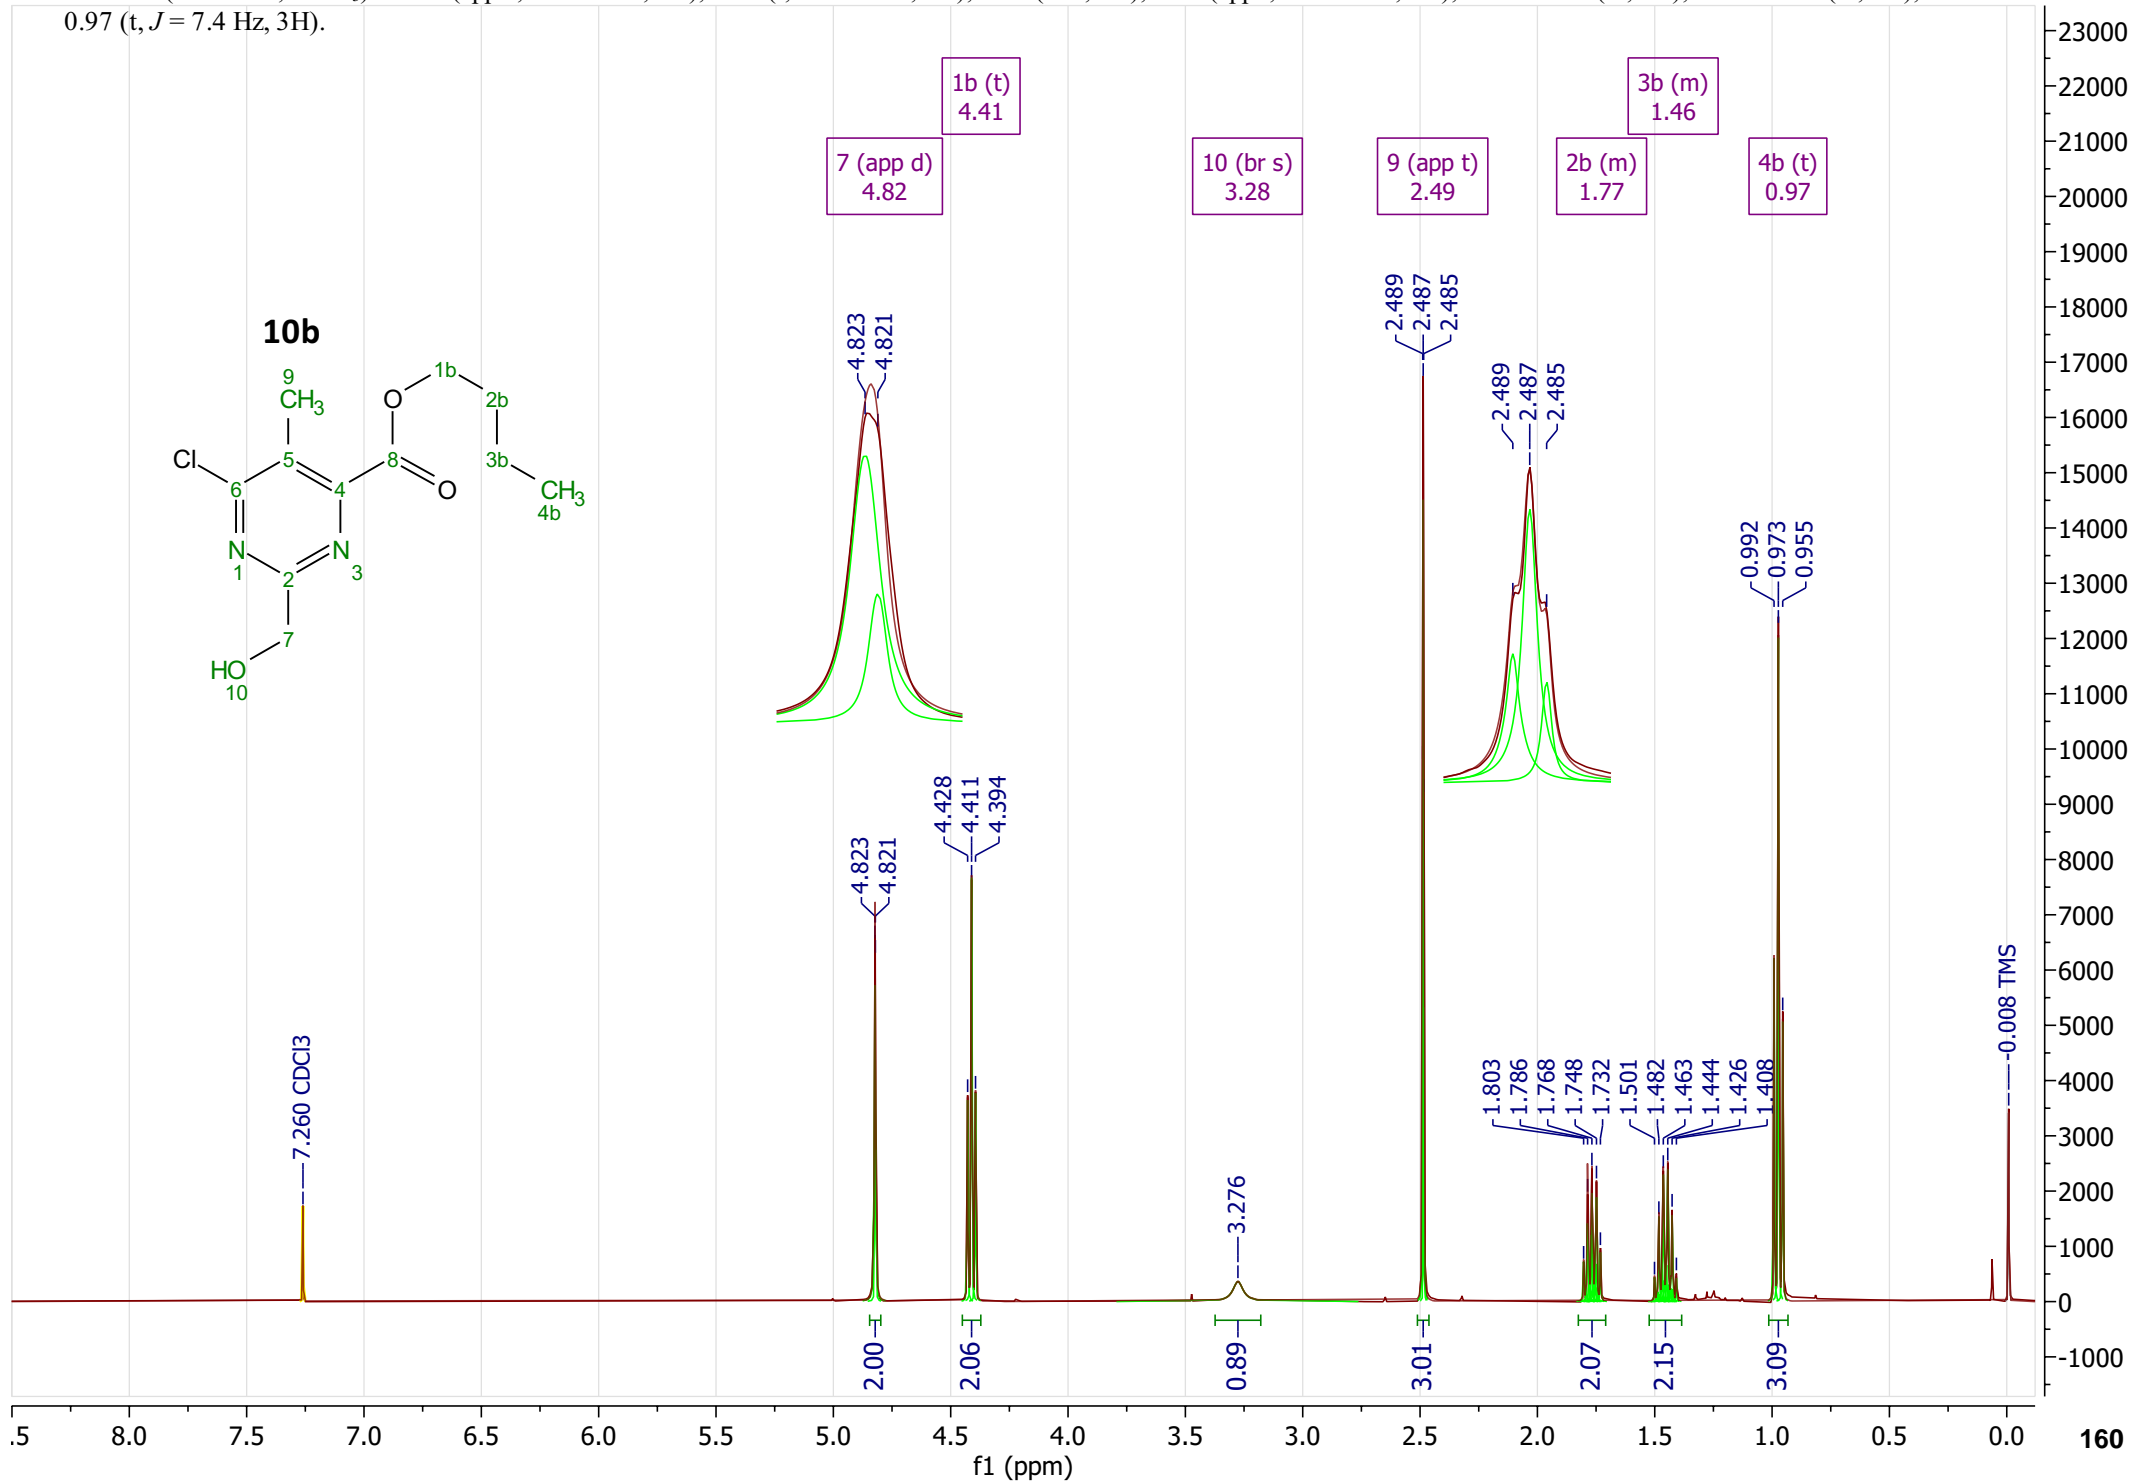



<sup>13</sup>C NMR (101 MHz, CDCl<sub>3</sub>) δ 166.5, 164.7, 163.9, 157.3, 127.0, 66.7, 64.2, 30.6, 19.2, 15.2, 13.8.

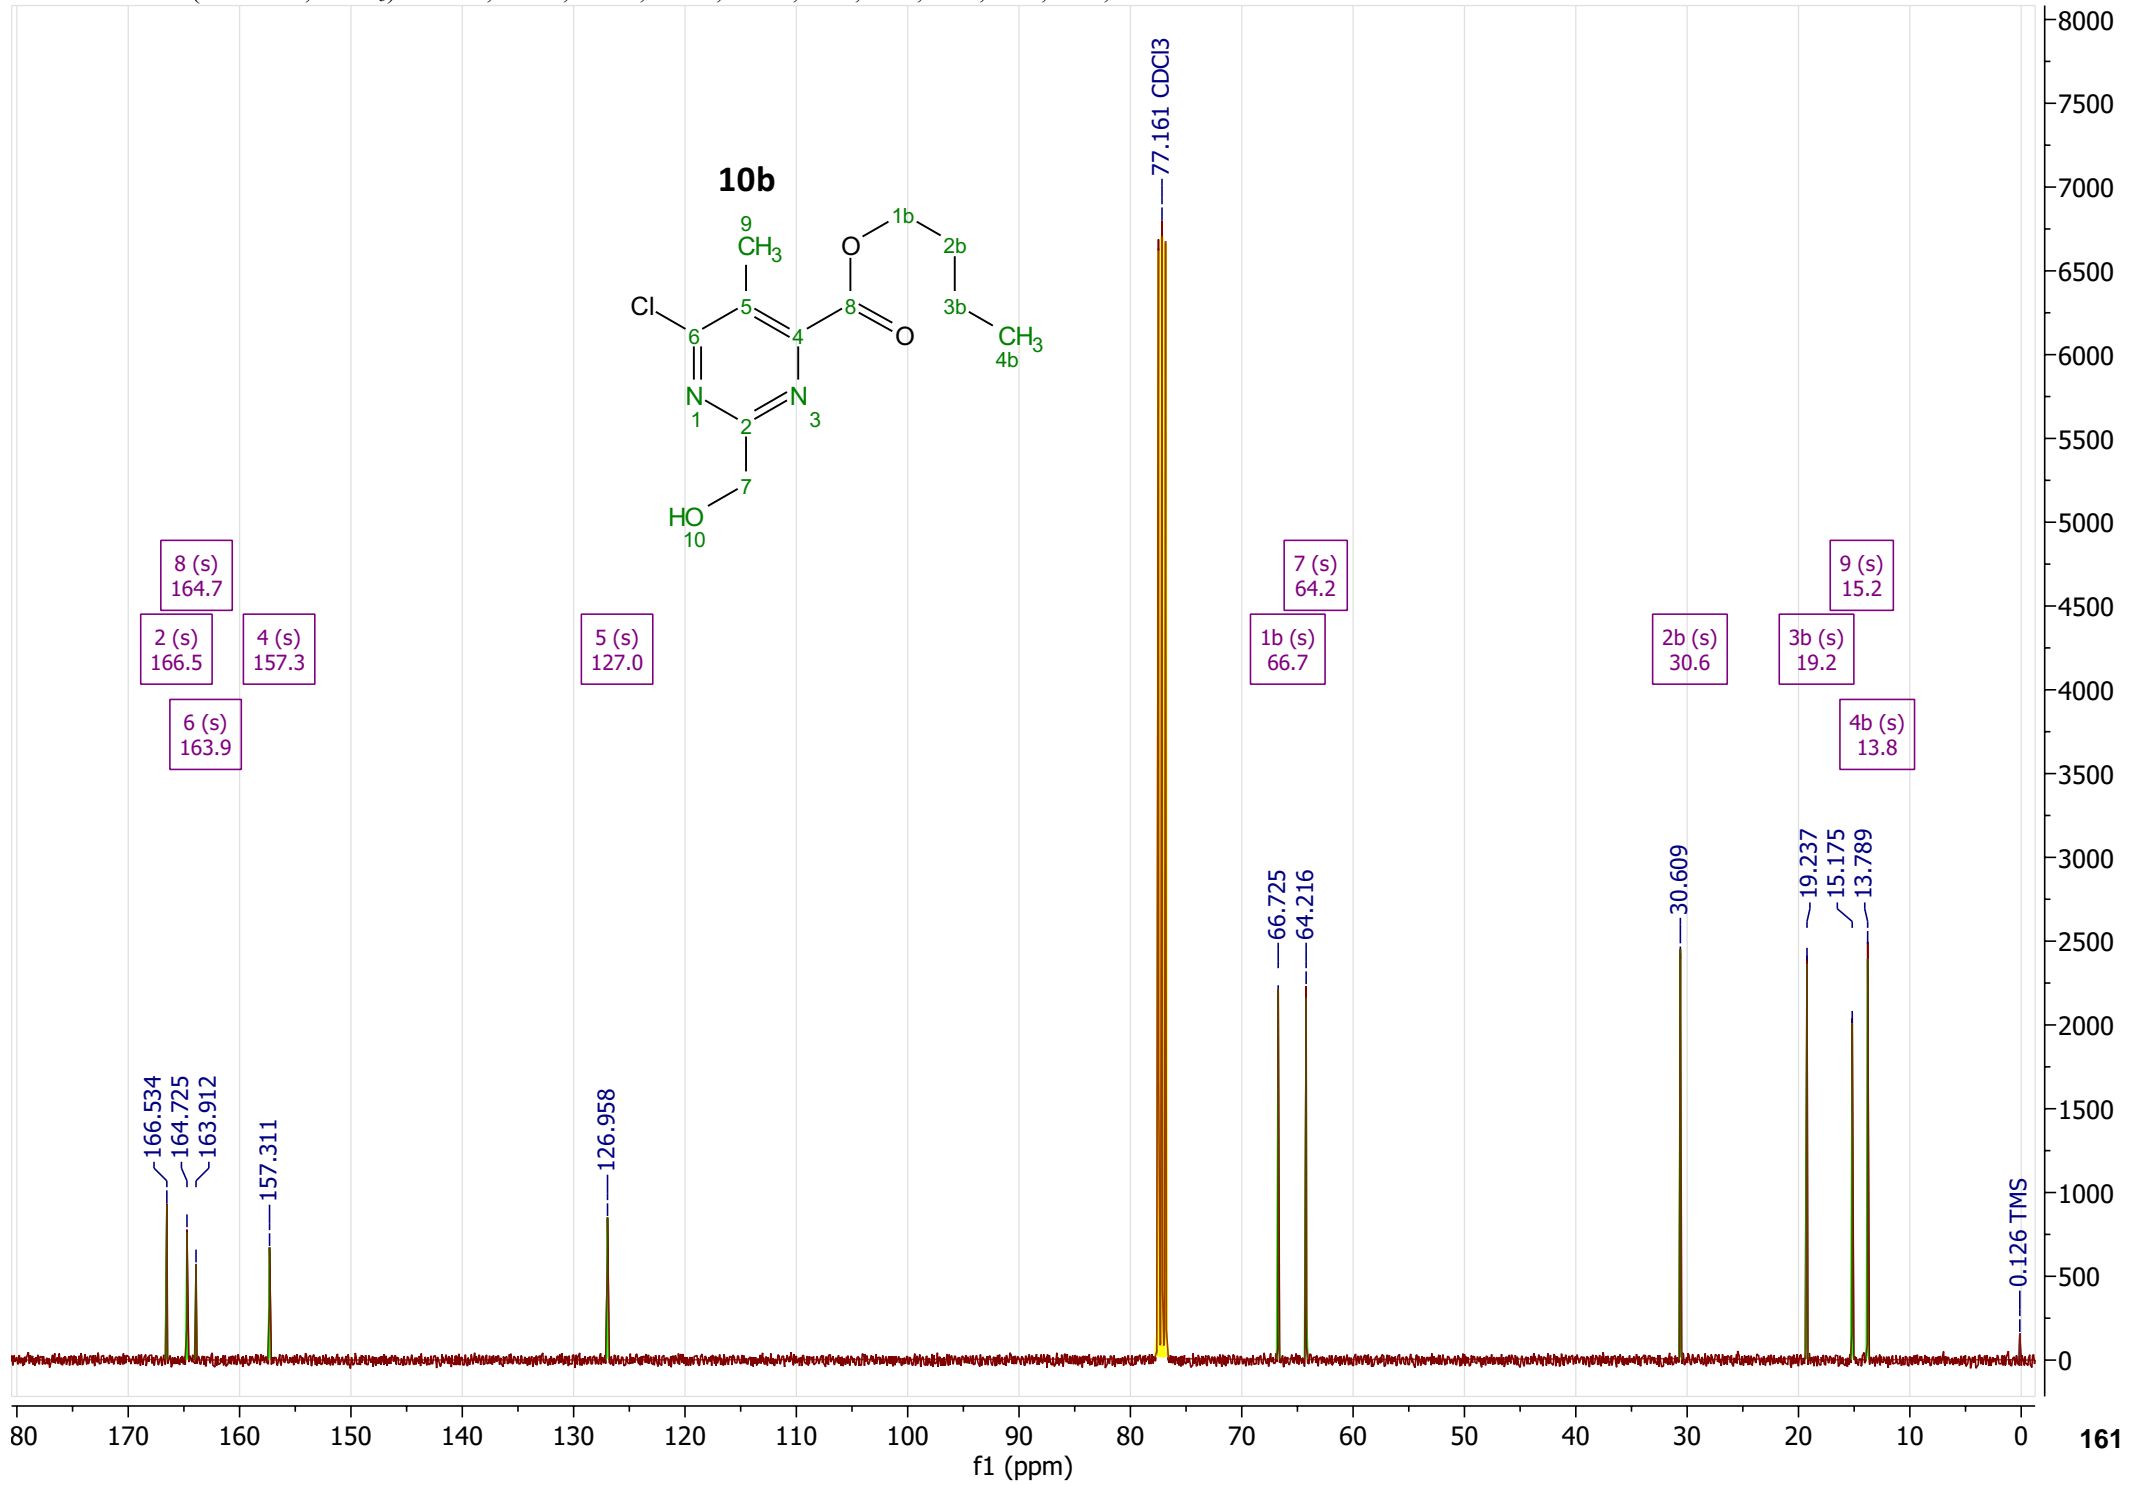

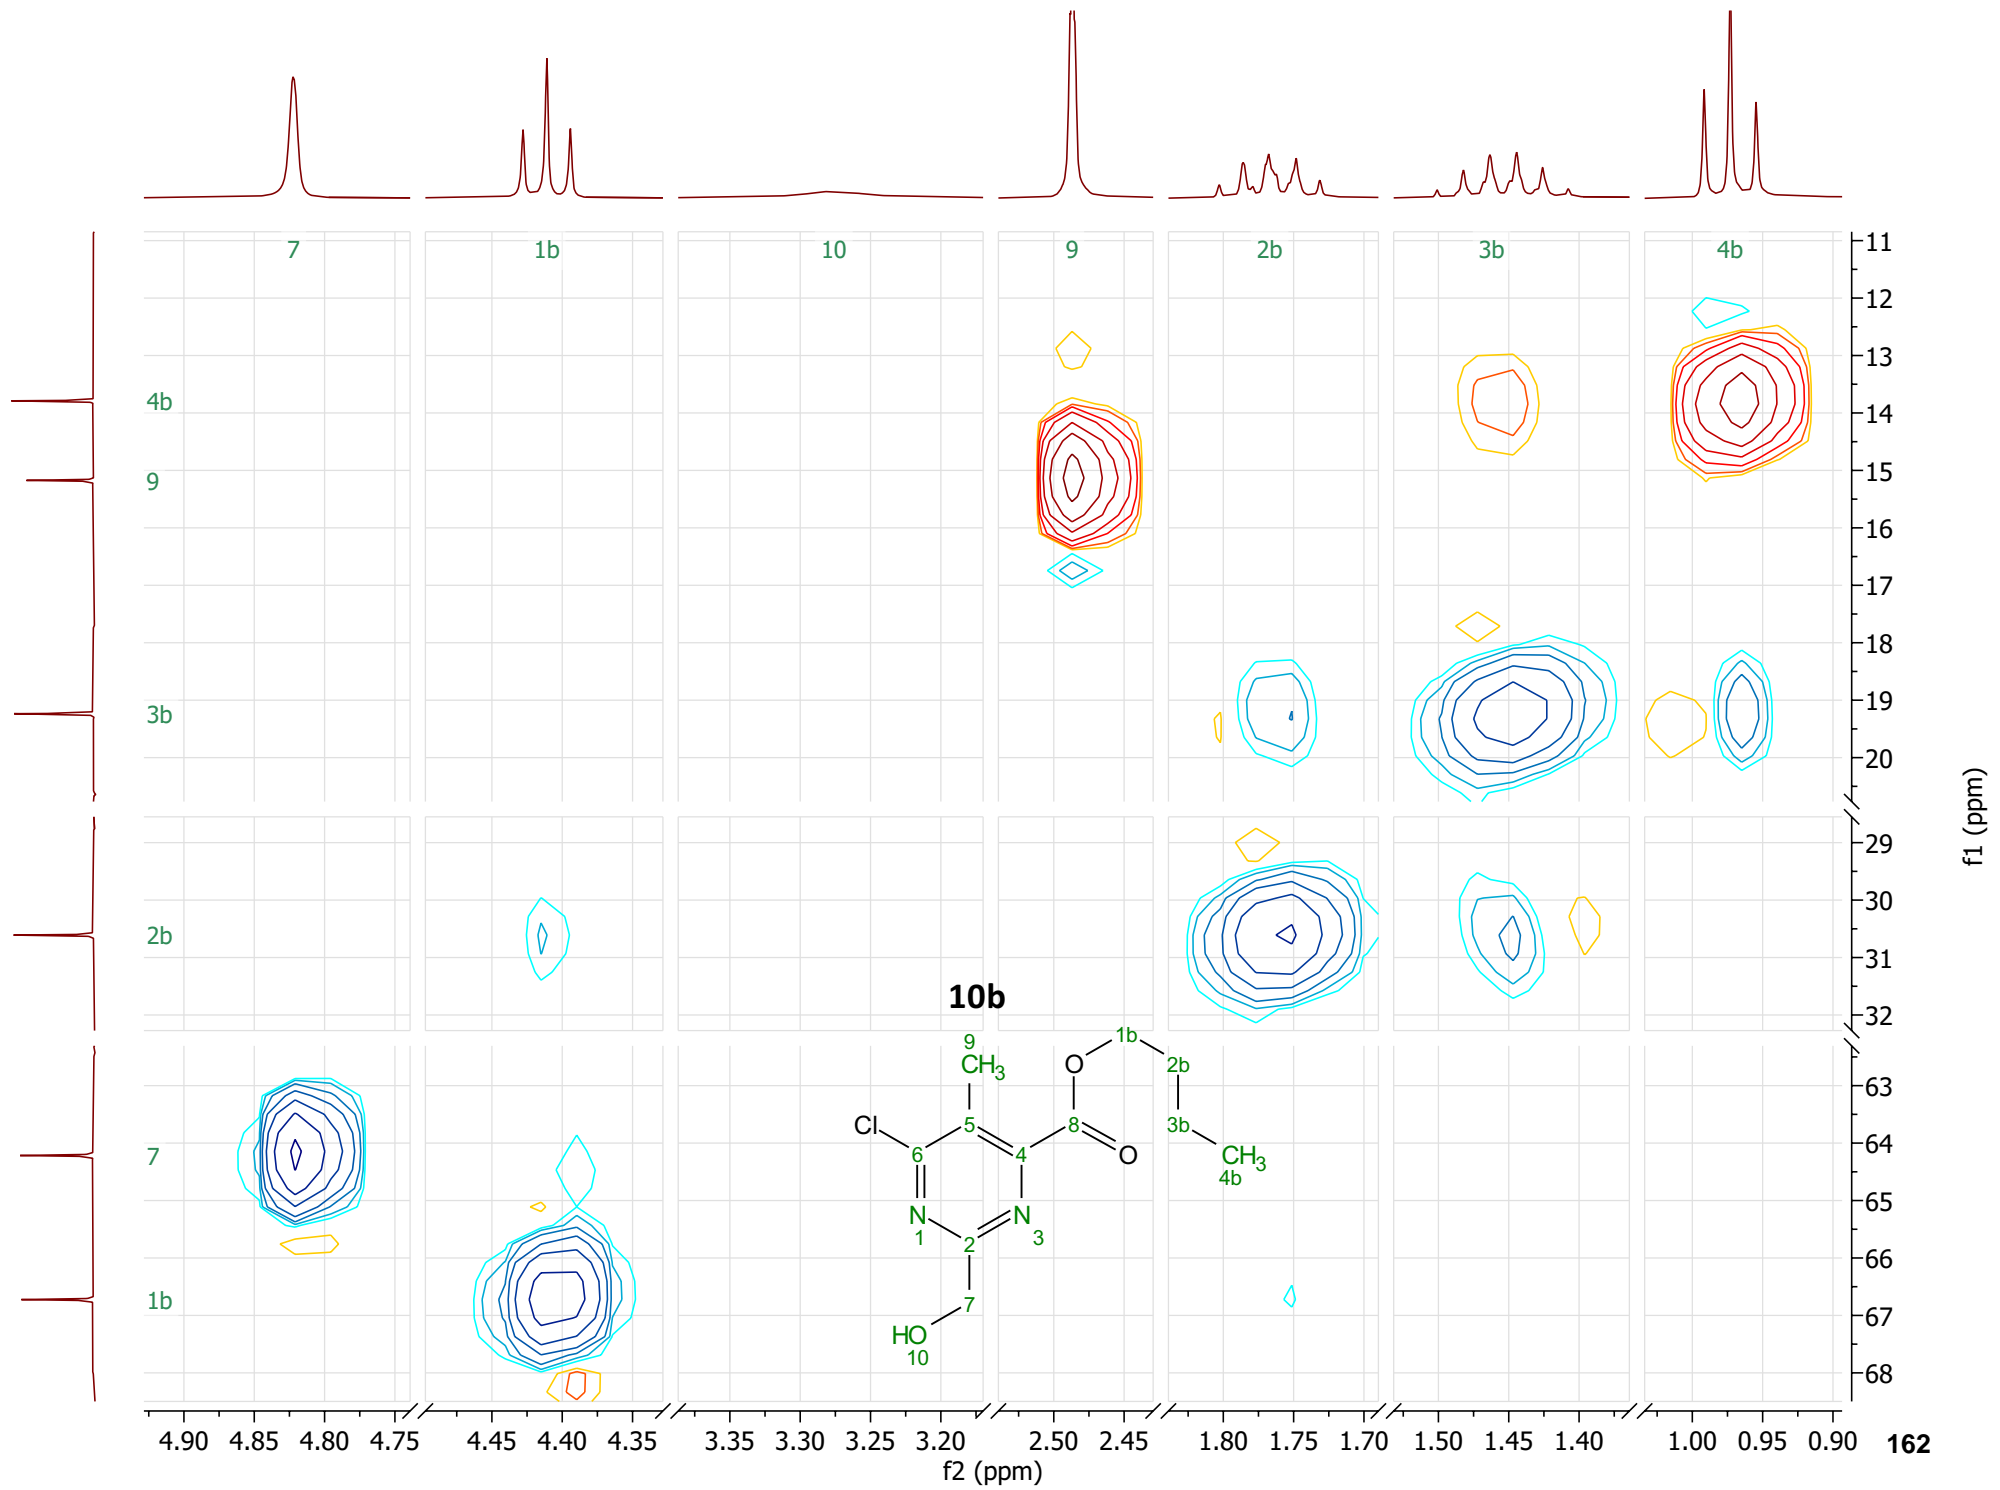

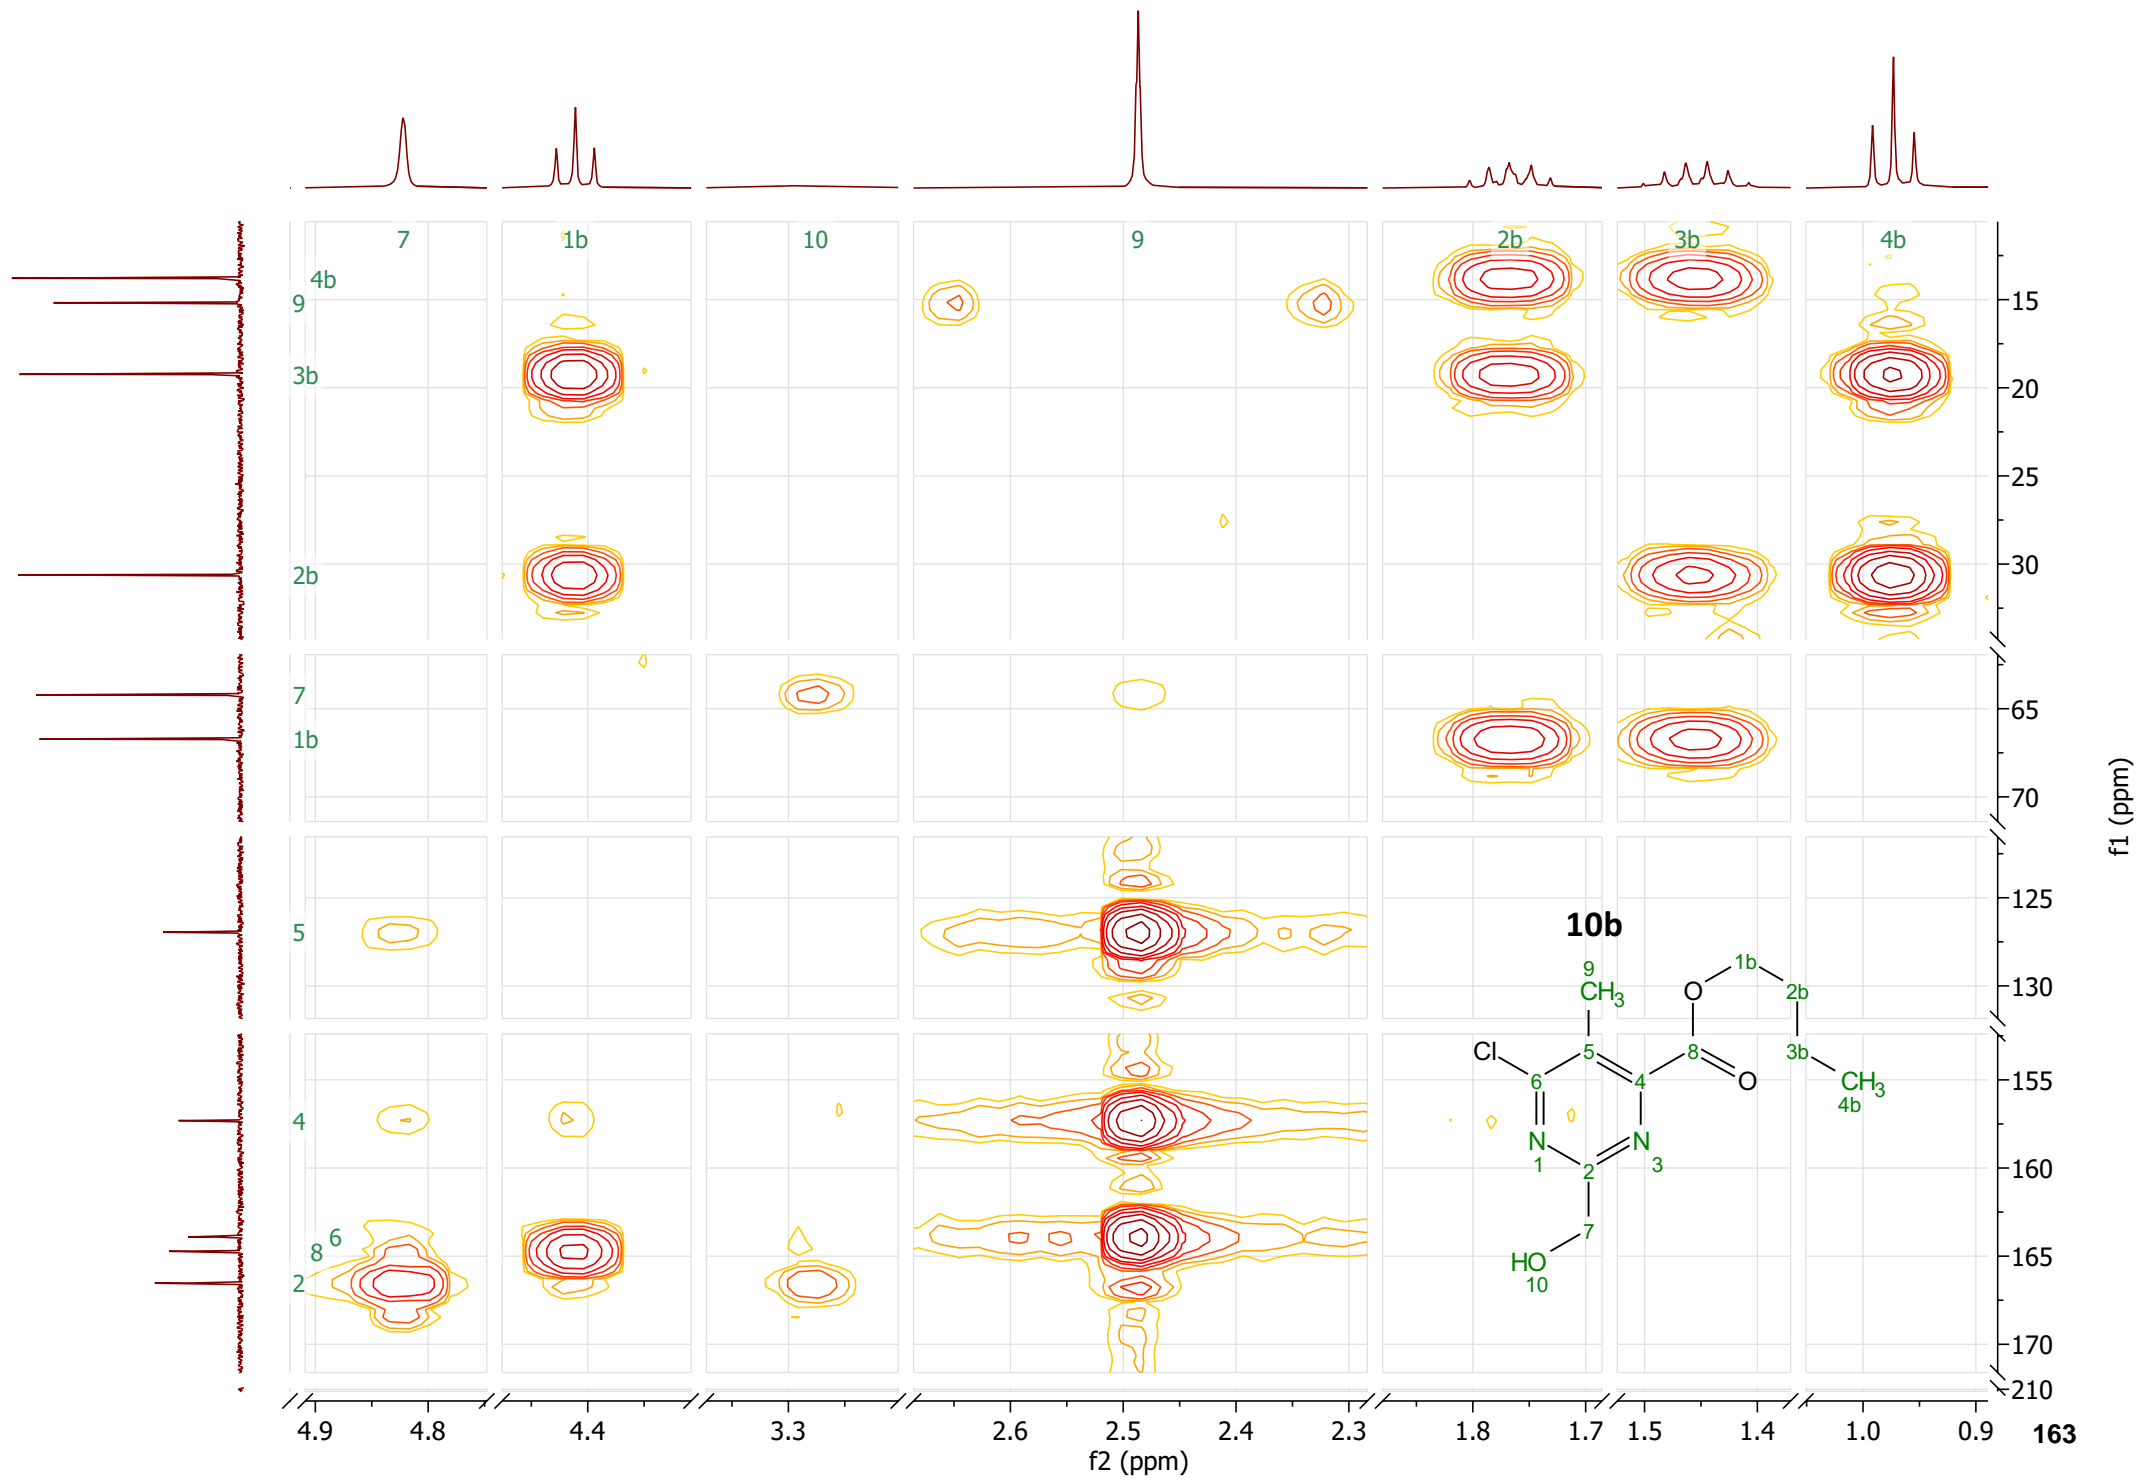

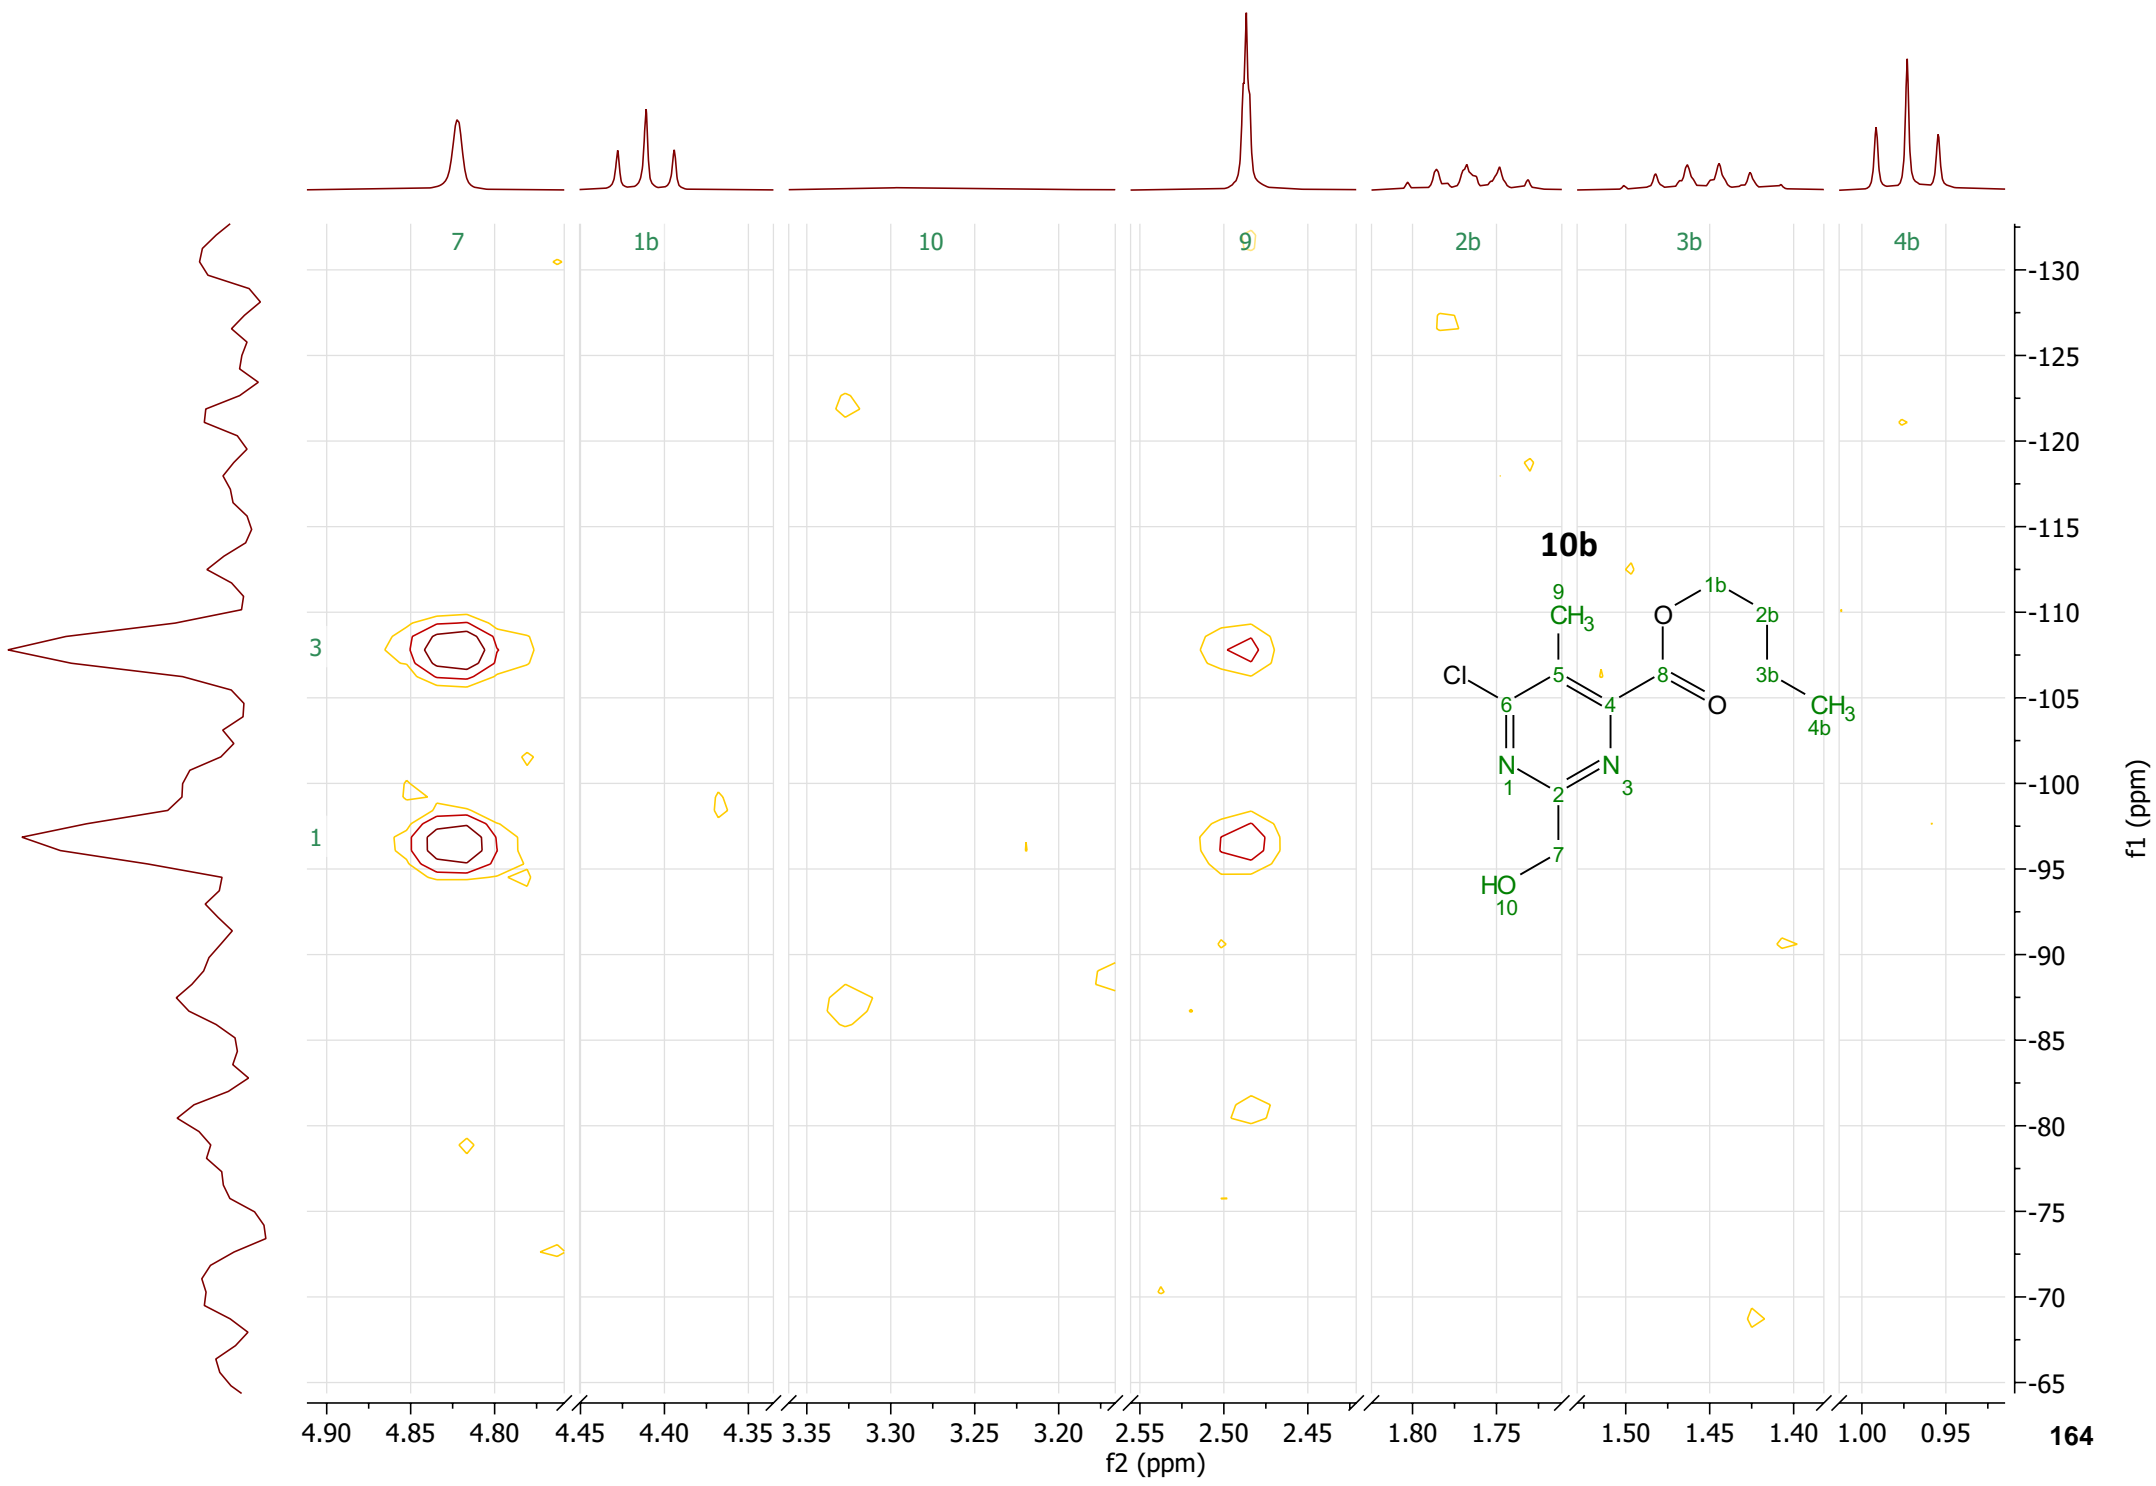

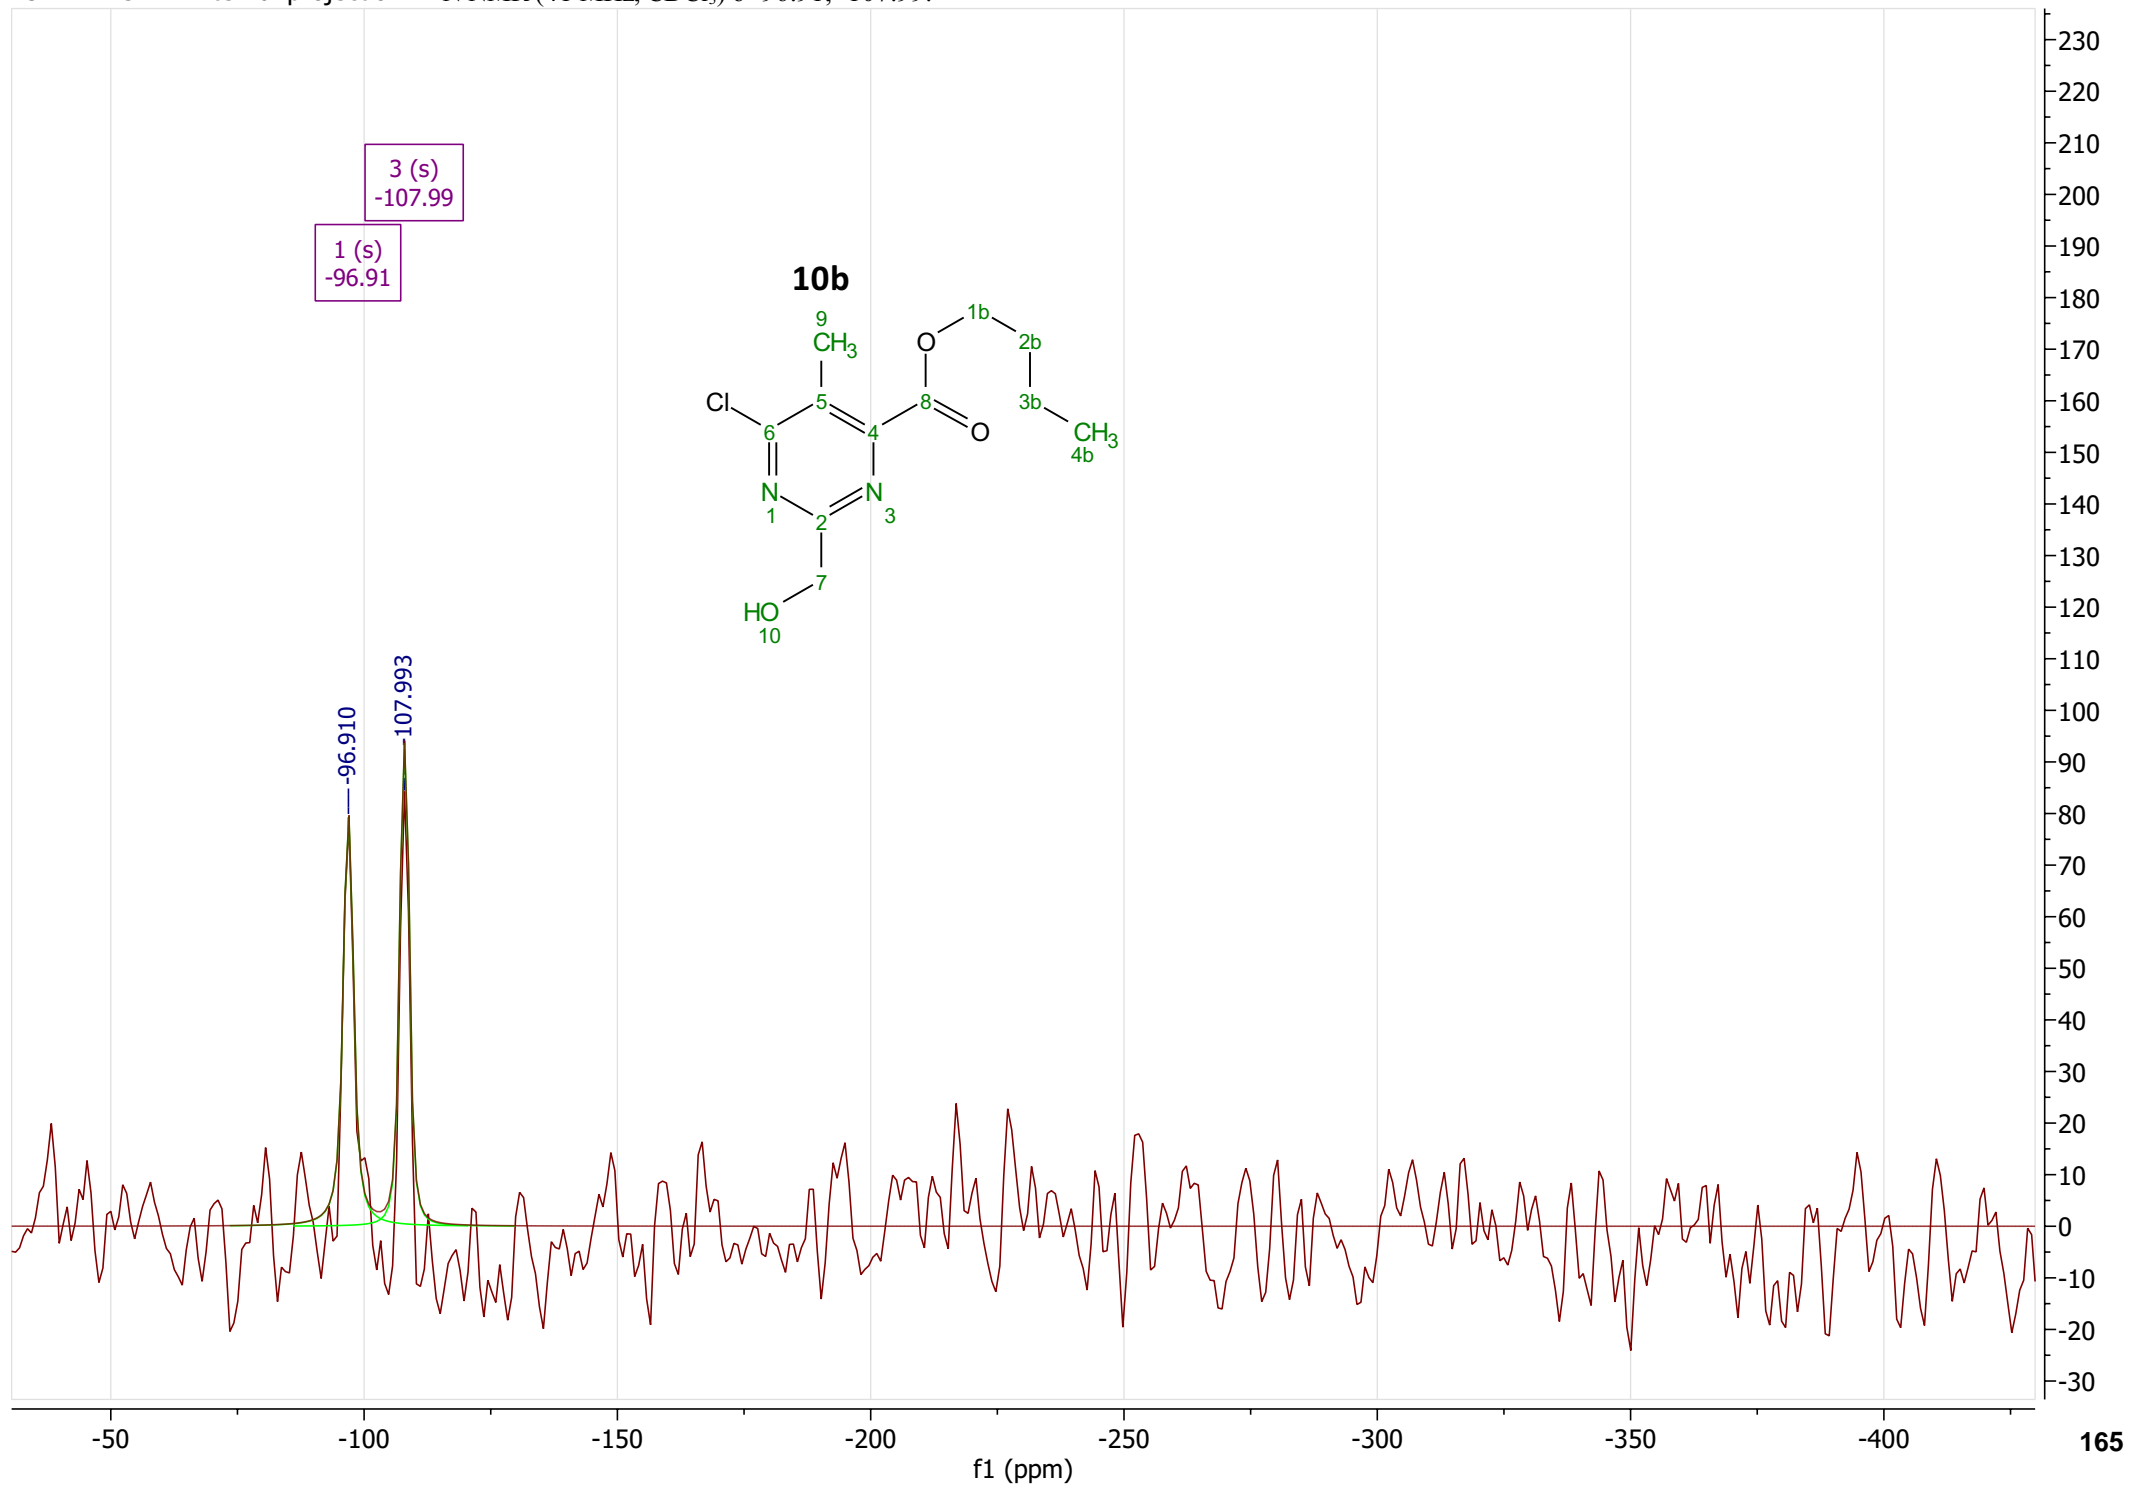

<sup>1</sup>H NMR (400 MHz, CDCl<sub>3</sub>) δ 4.82 (d, *J* = 0.8 Hz, 2H), 4.40 (t, *J* = 6.8 Hz, 2H), 3.13 (br s, 1H), 2.48 (app t, *J* = 0.8 Hz, 3H), 1.83 – 1.72 (m, 2H), 1.46 – 1.37 (m, 2H), 1.37 – 1.23 (m, 6H), 0.88 (app t, *J* = 7.0 Hz, 3H).

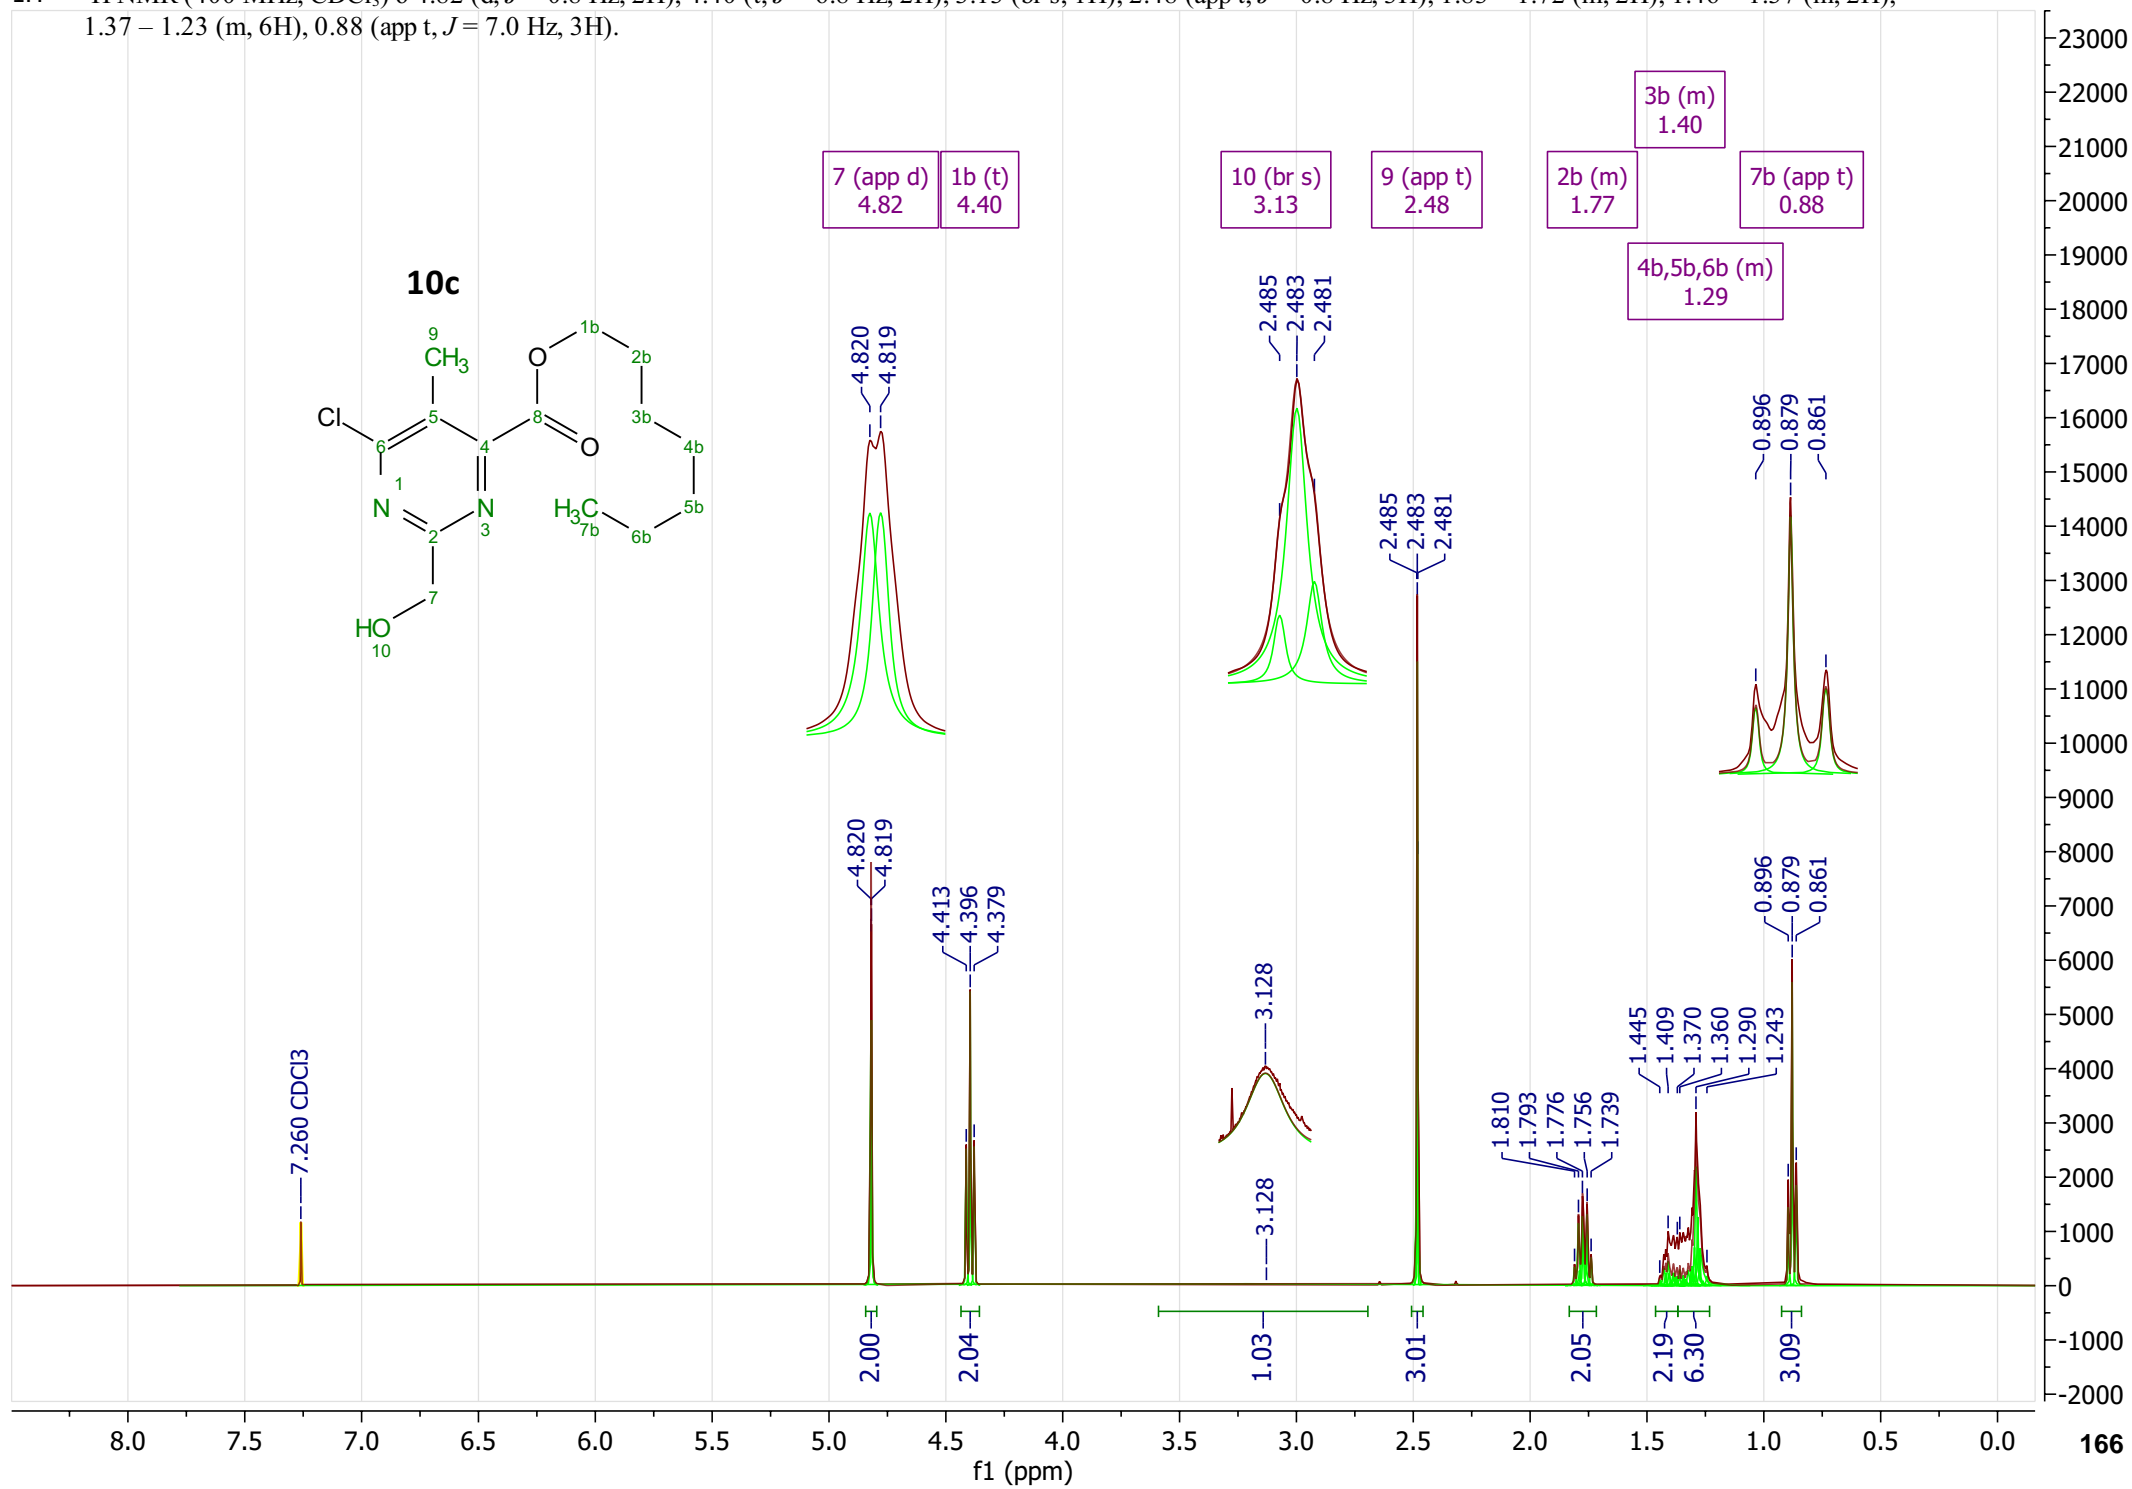

<sup>13</sup>C NMR (101 MHz, CDCl<sub>3</sub>) δ 166.5, 164.7, 163.9, 157.3, 127.0, 67.0, 64.2, 31.8, 29.0, 28.6, 25.9, 22.7, 15.2, 14.2.

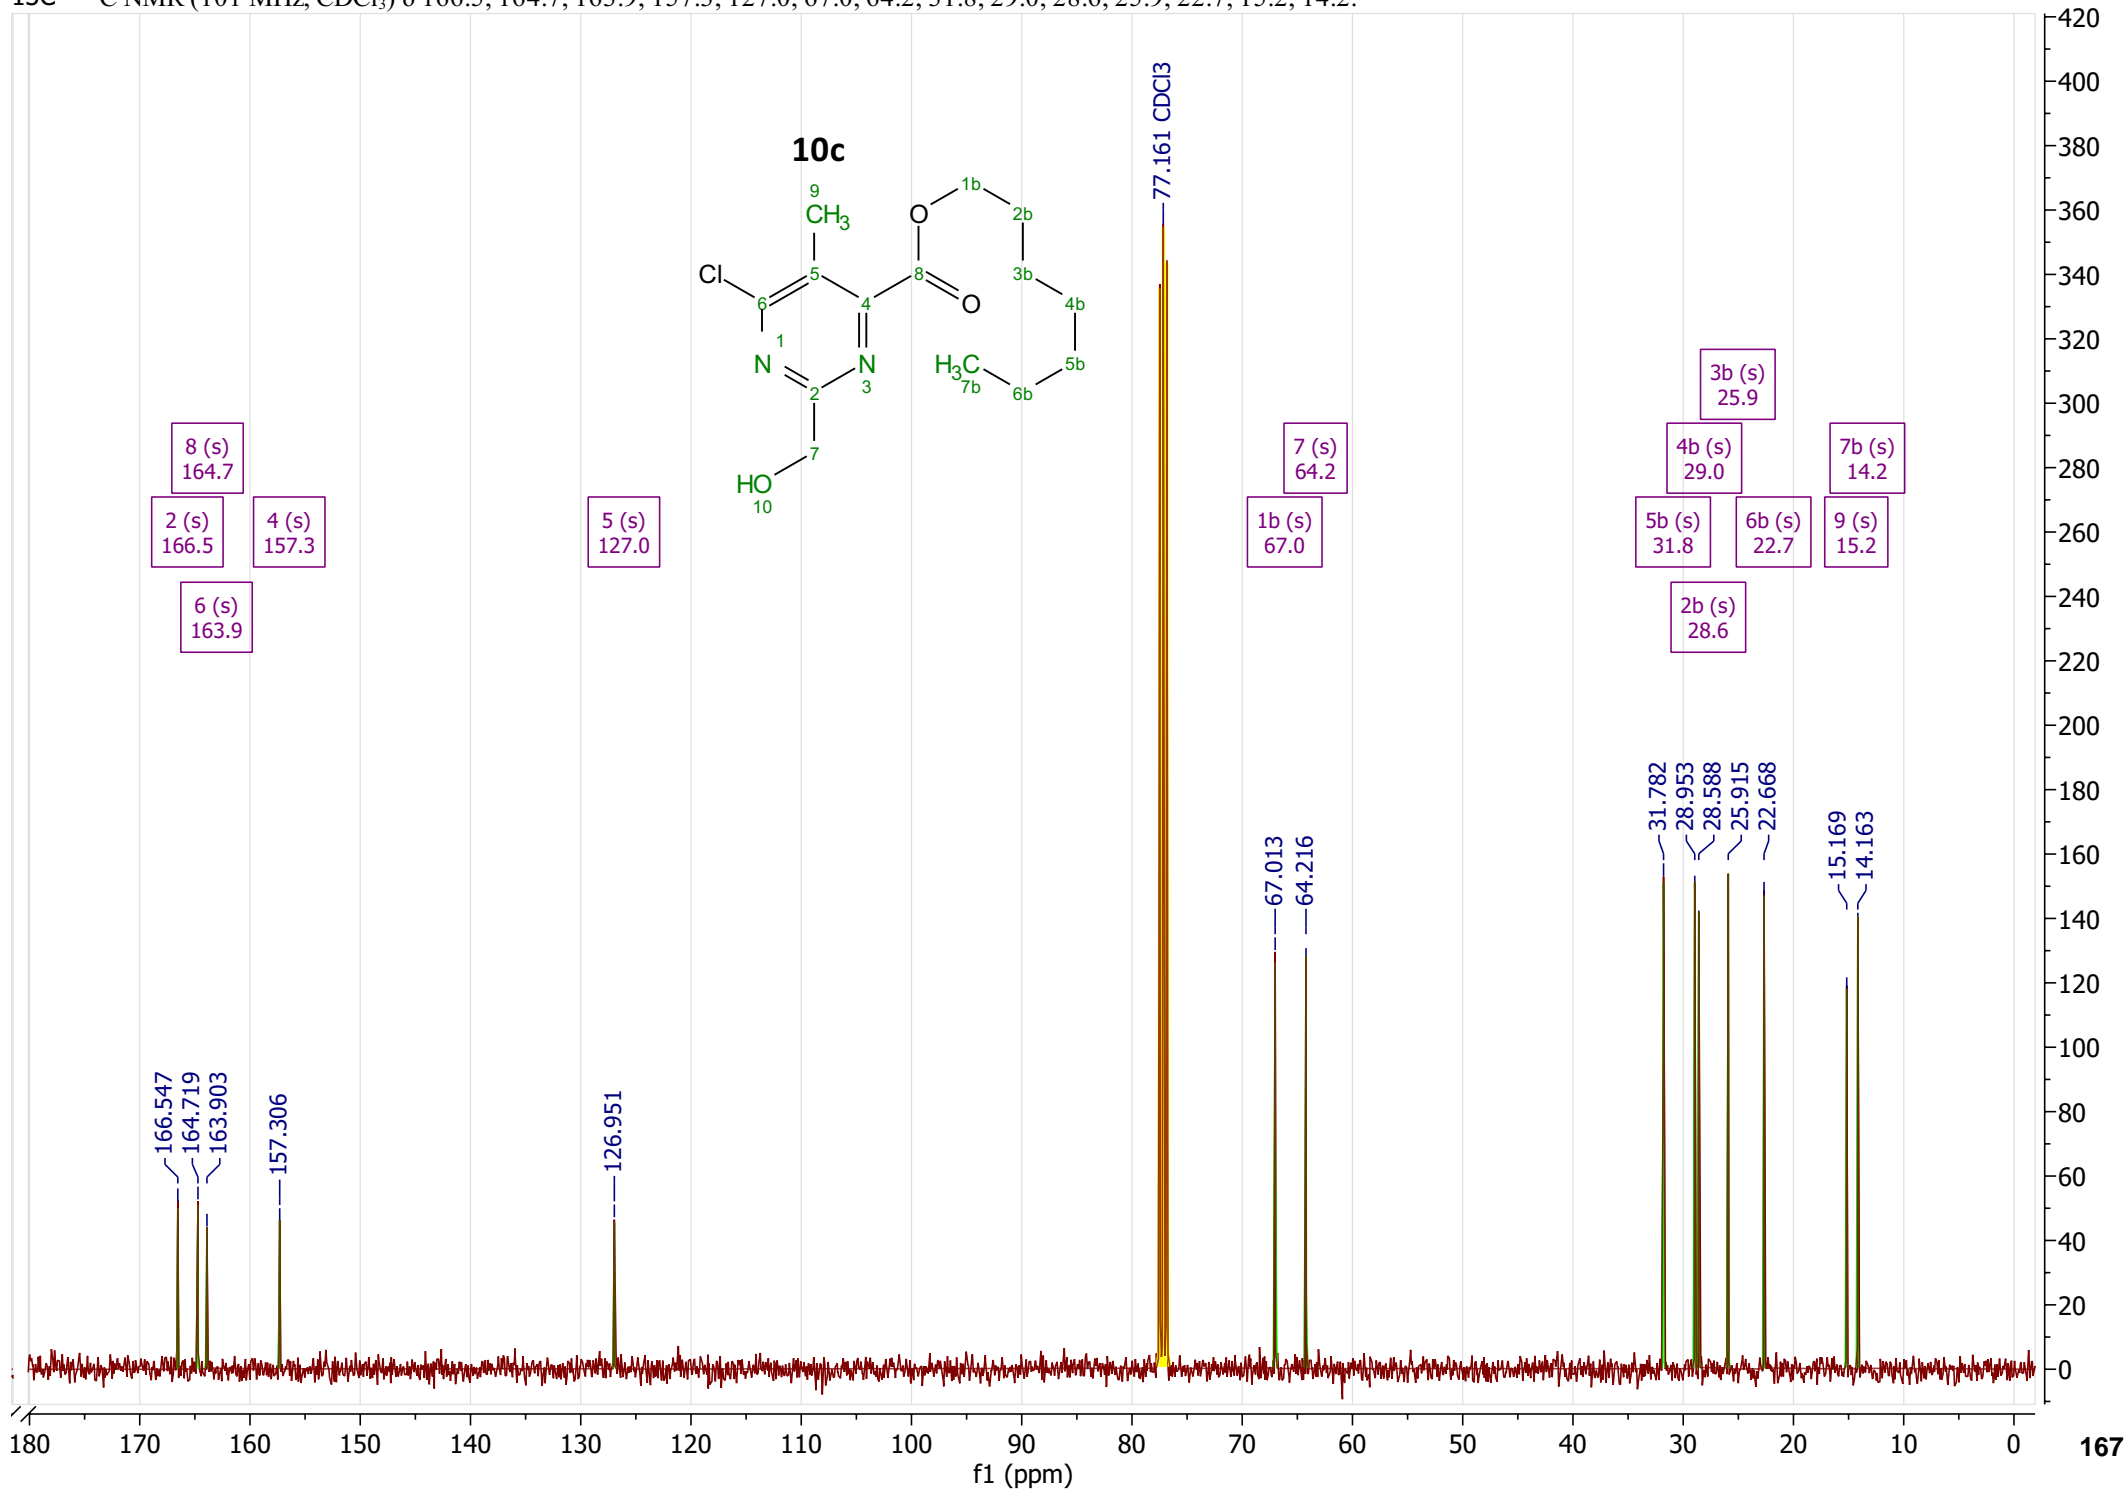

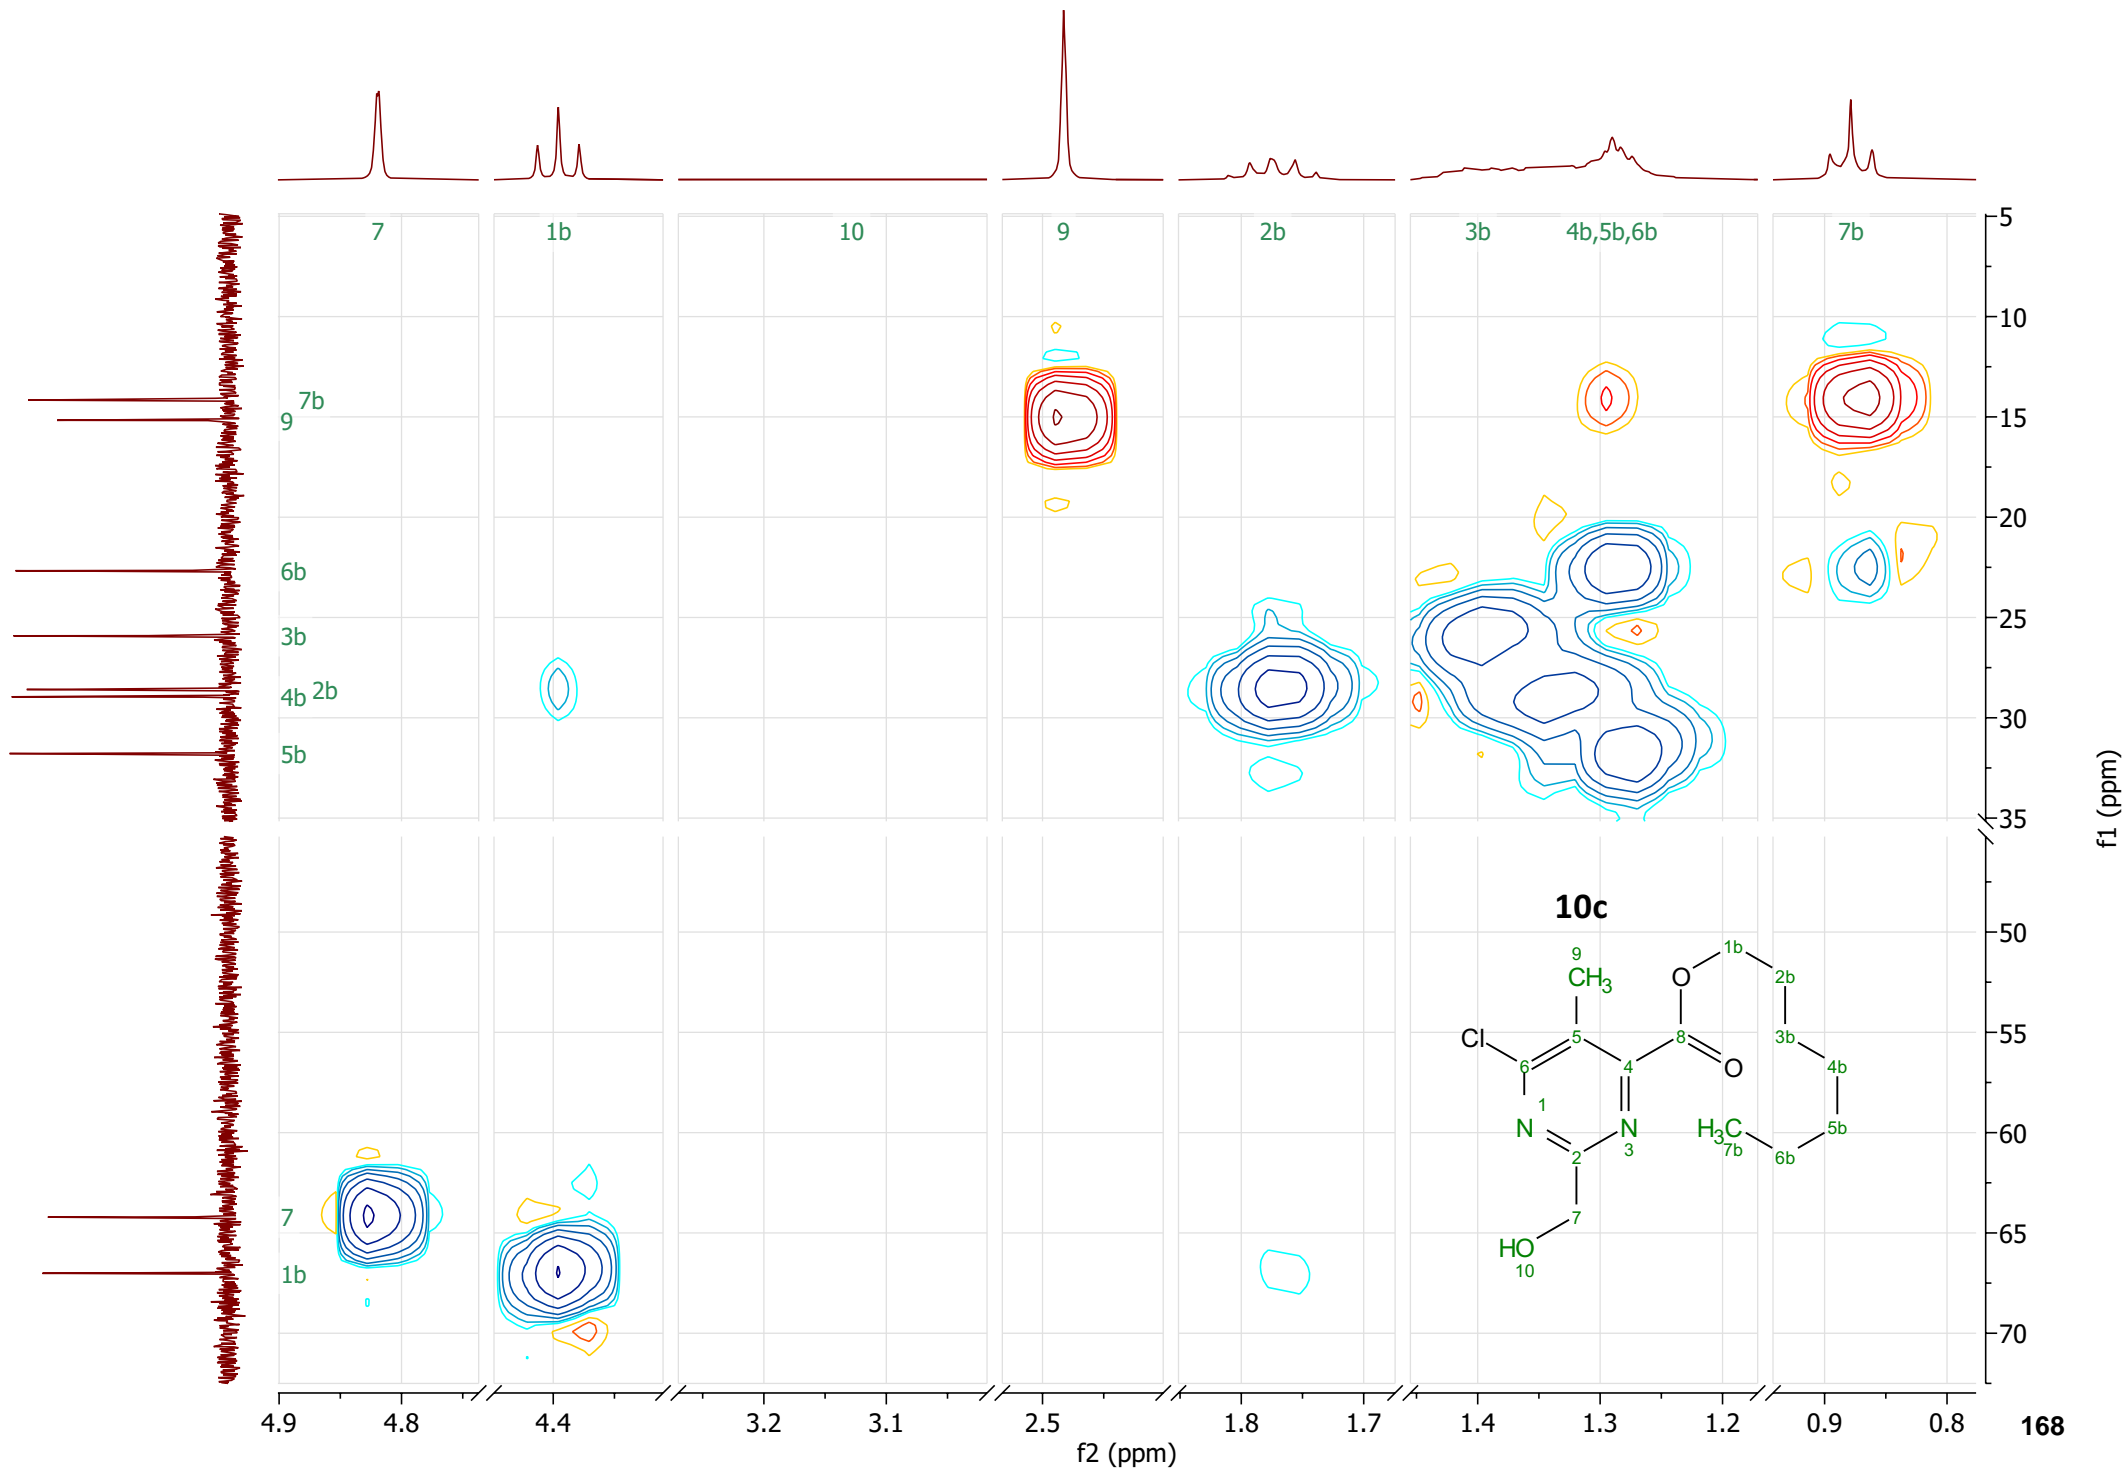



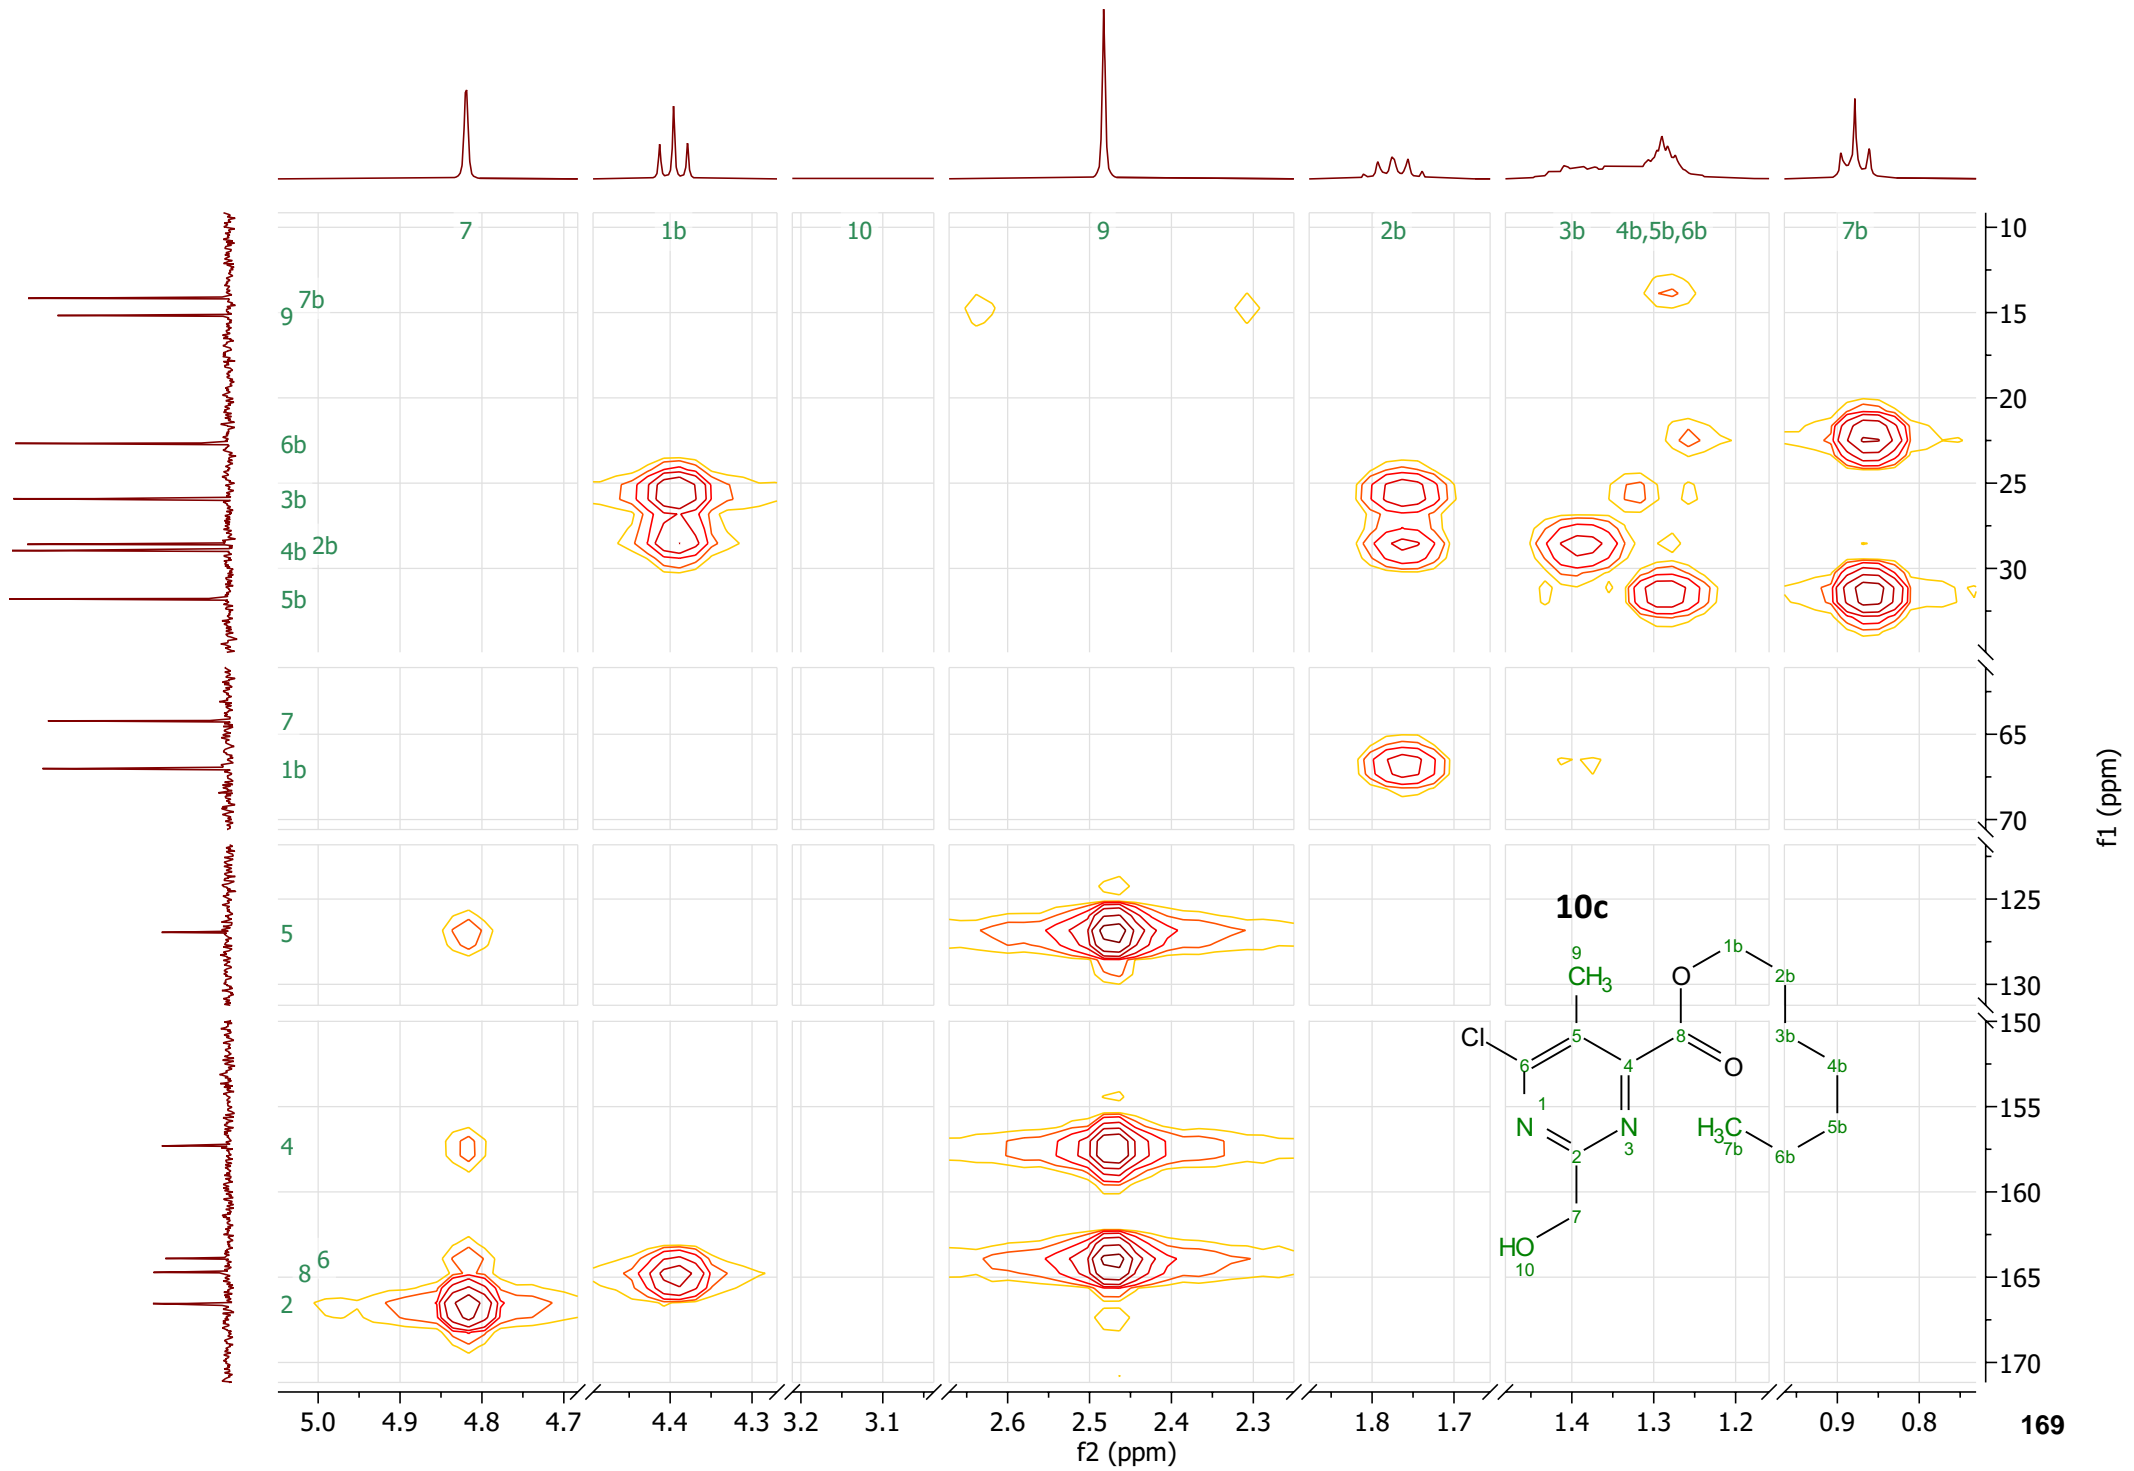

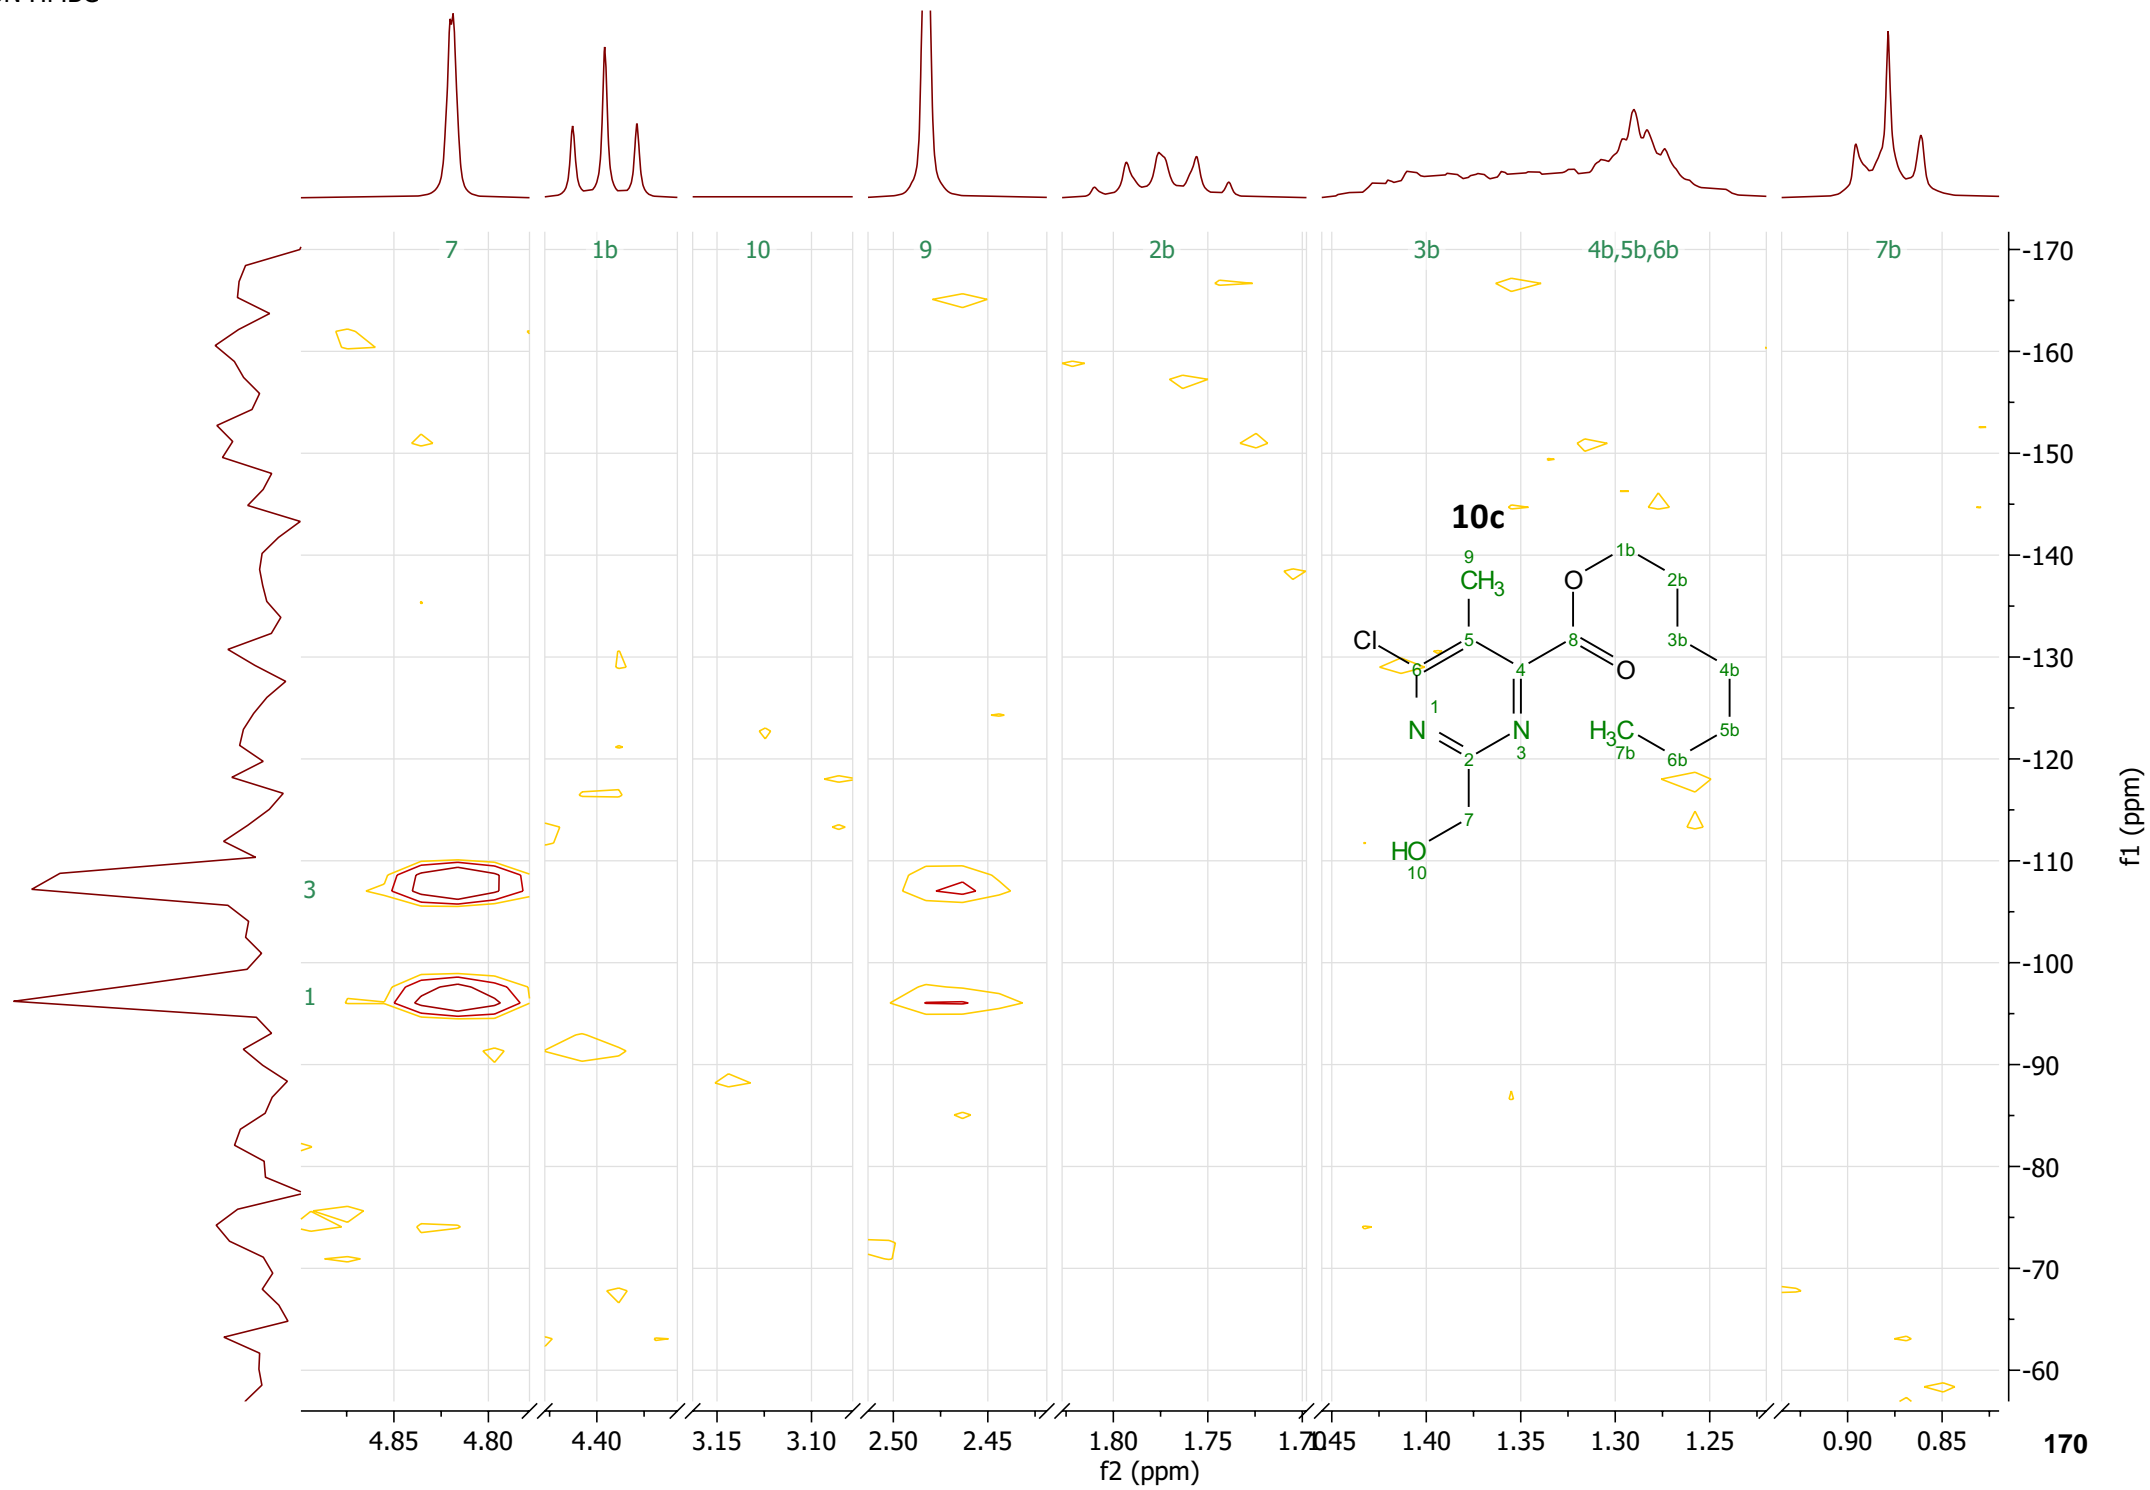

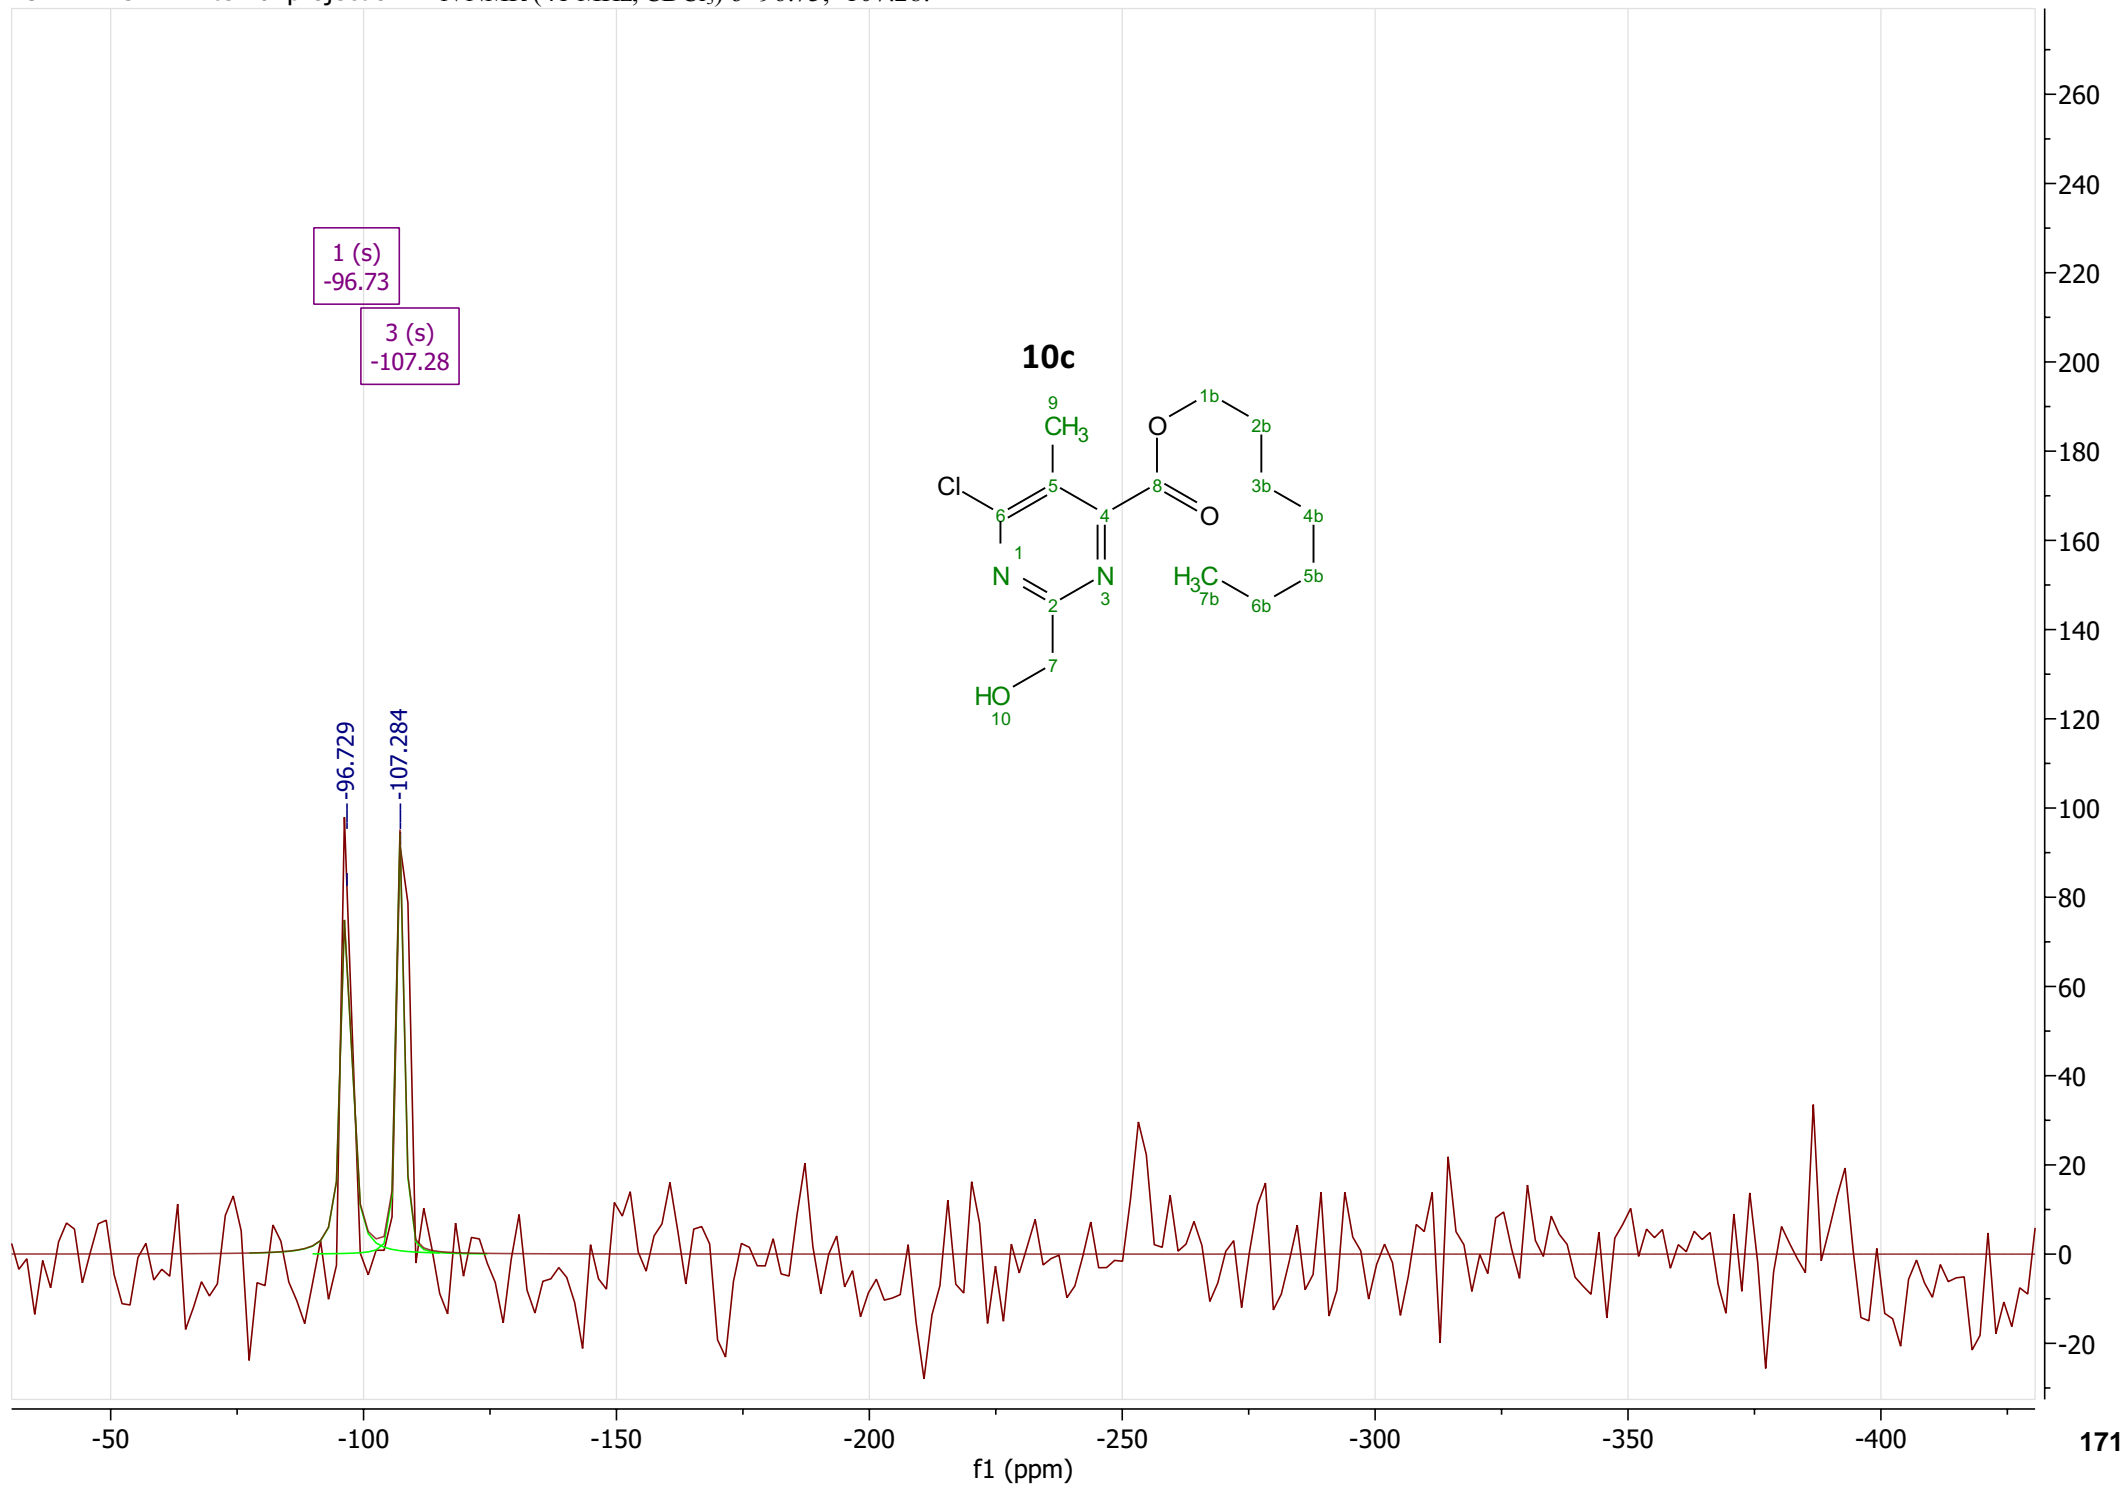

$^1\text{H}$  NMR (400 MHz,  $\text{CDCl}_3$ )  $\delta$  4.82 (app q,  $J = 0.8$  Hz, 2H), 4.40 (t,  $J = 6.8$  Hz, 2H), 3.12 (br s, 1H), 2.49 (app t,  $J = 0.8$  Hz, 3H), 1.84 – 1.72 (m, 2H), 1.47 – 1.37 (m, 2H), 1.36 – 1.21 (m, 8H), 0.88 (app t,  $J = 7.0$  Hz, 3H).

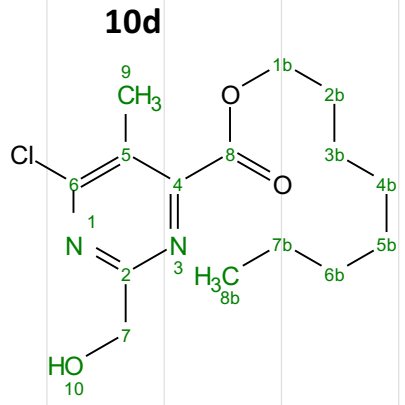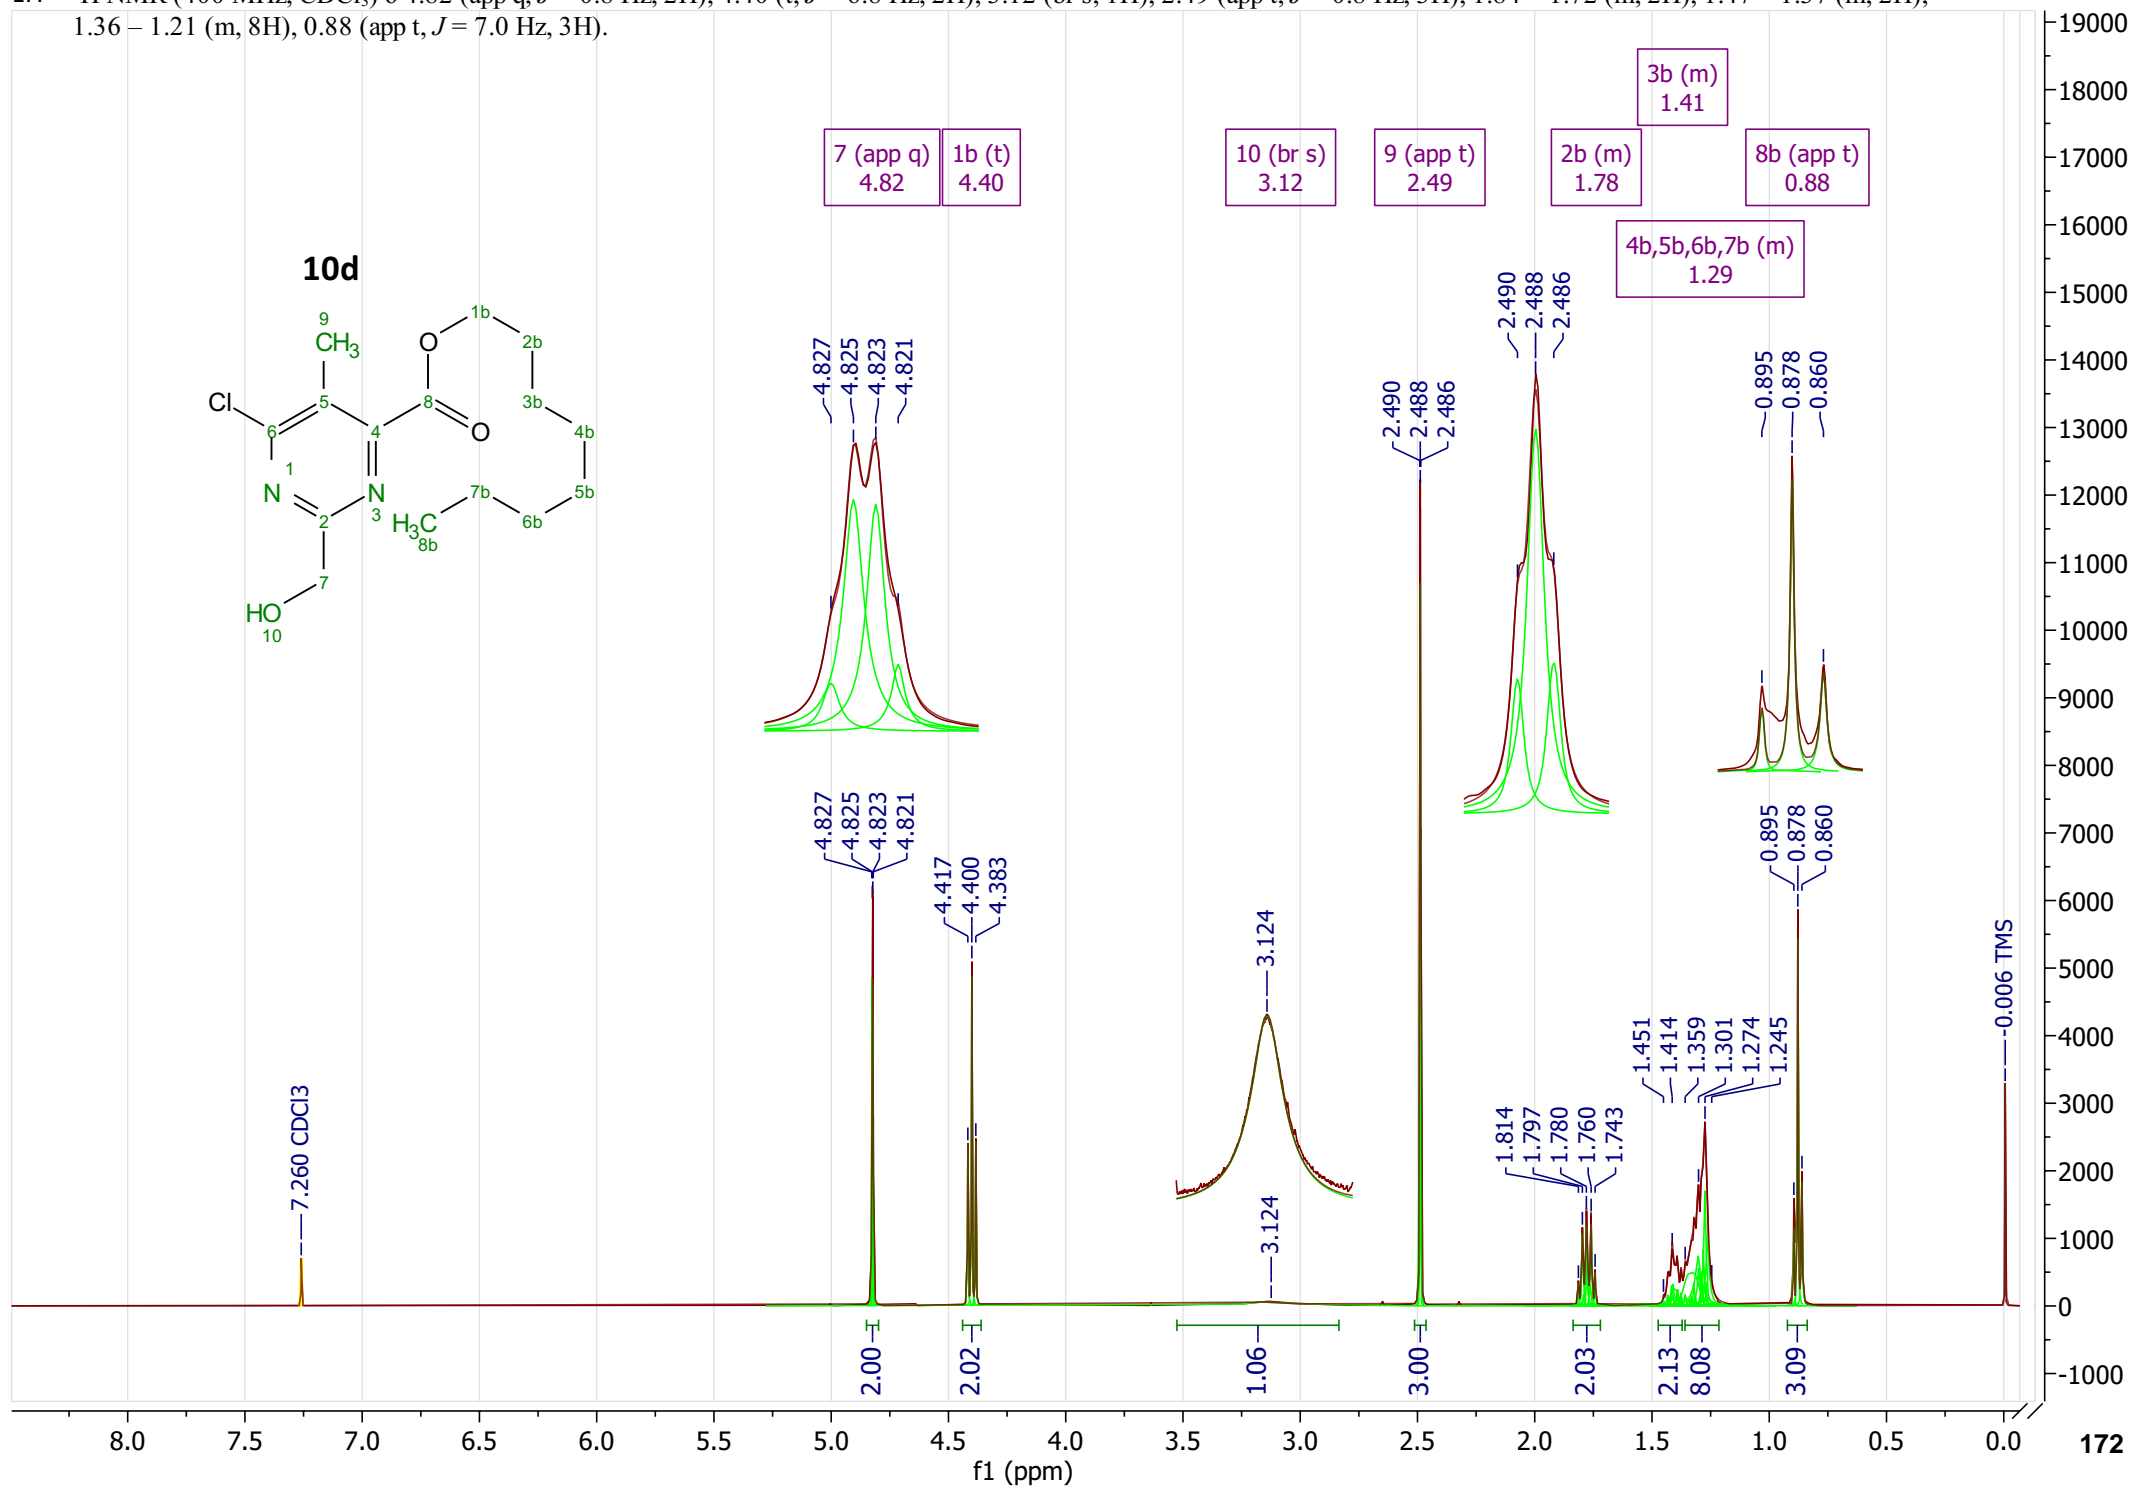

<sup>13</sup>C NMR (101 MHz, CDCl<sub>3</sub>) δ 166.5, 164.7, 163.9, 157.3, 127.0, 67.0, 64.2, 31.9, 29.3 (2C), 28.6, 26.0, 22.8, 15.2, 14.2.

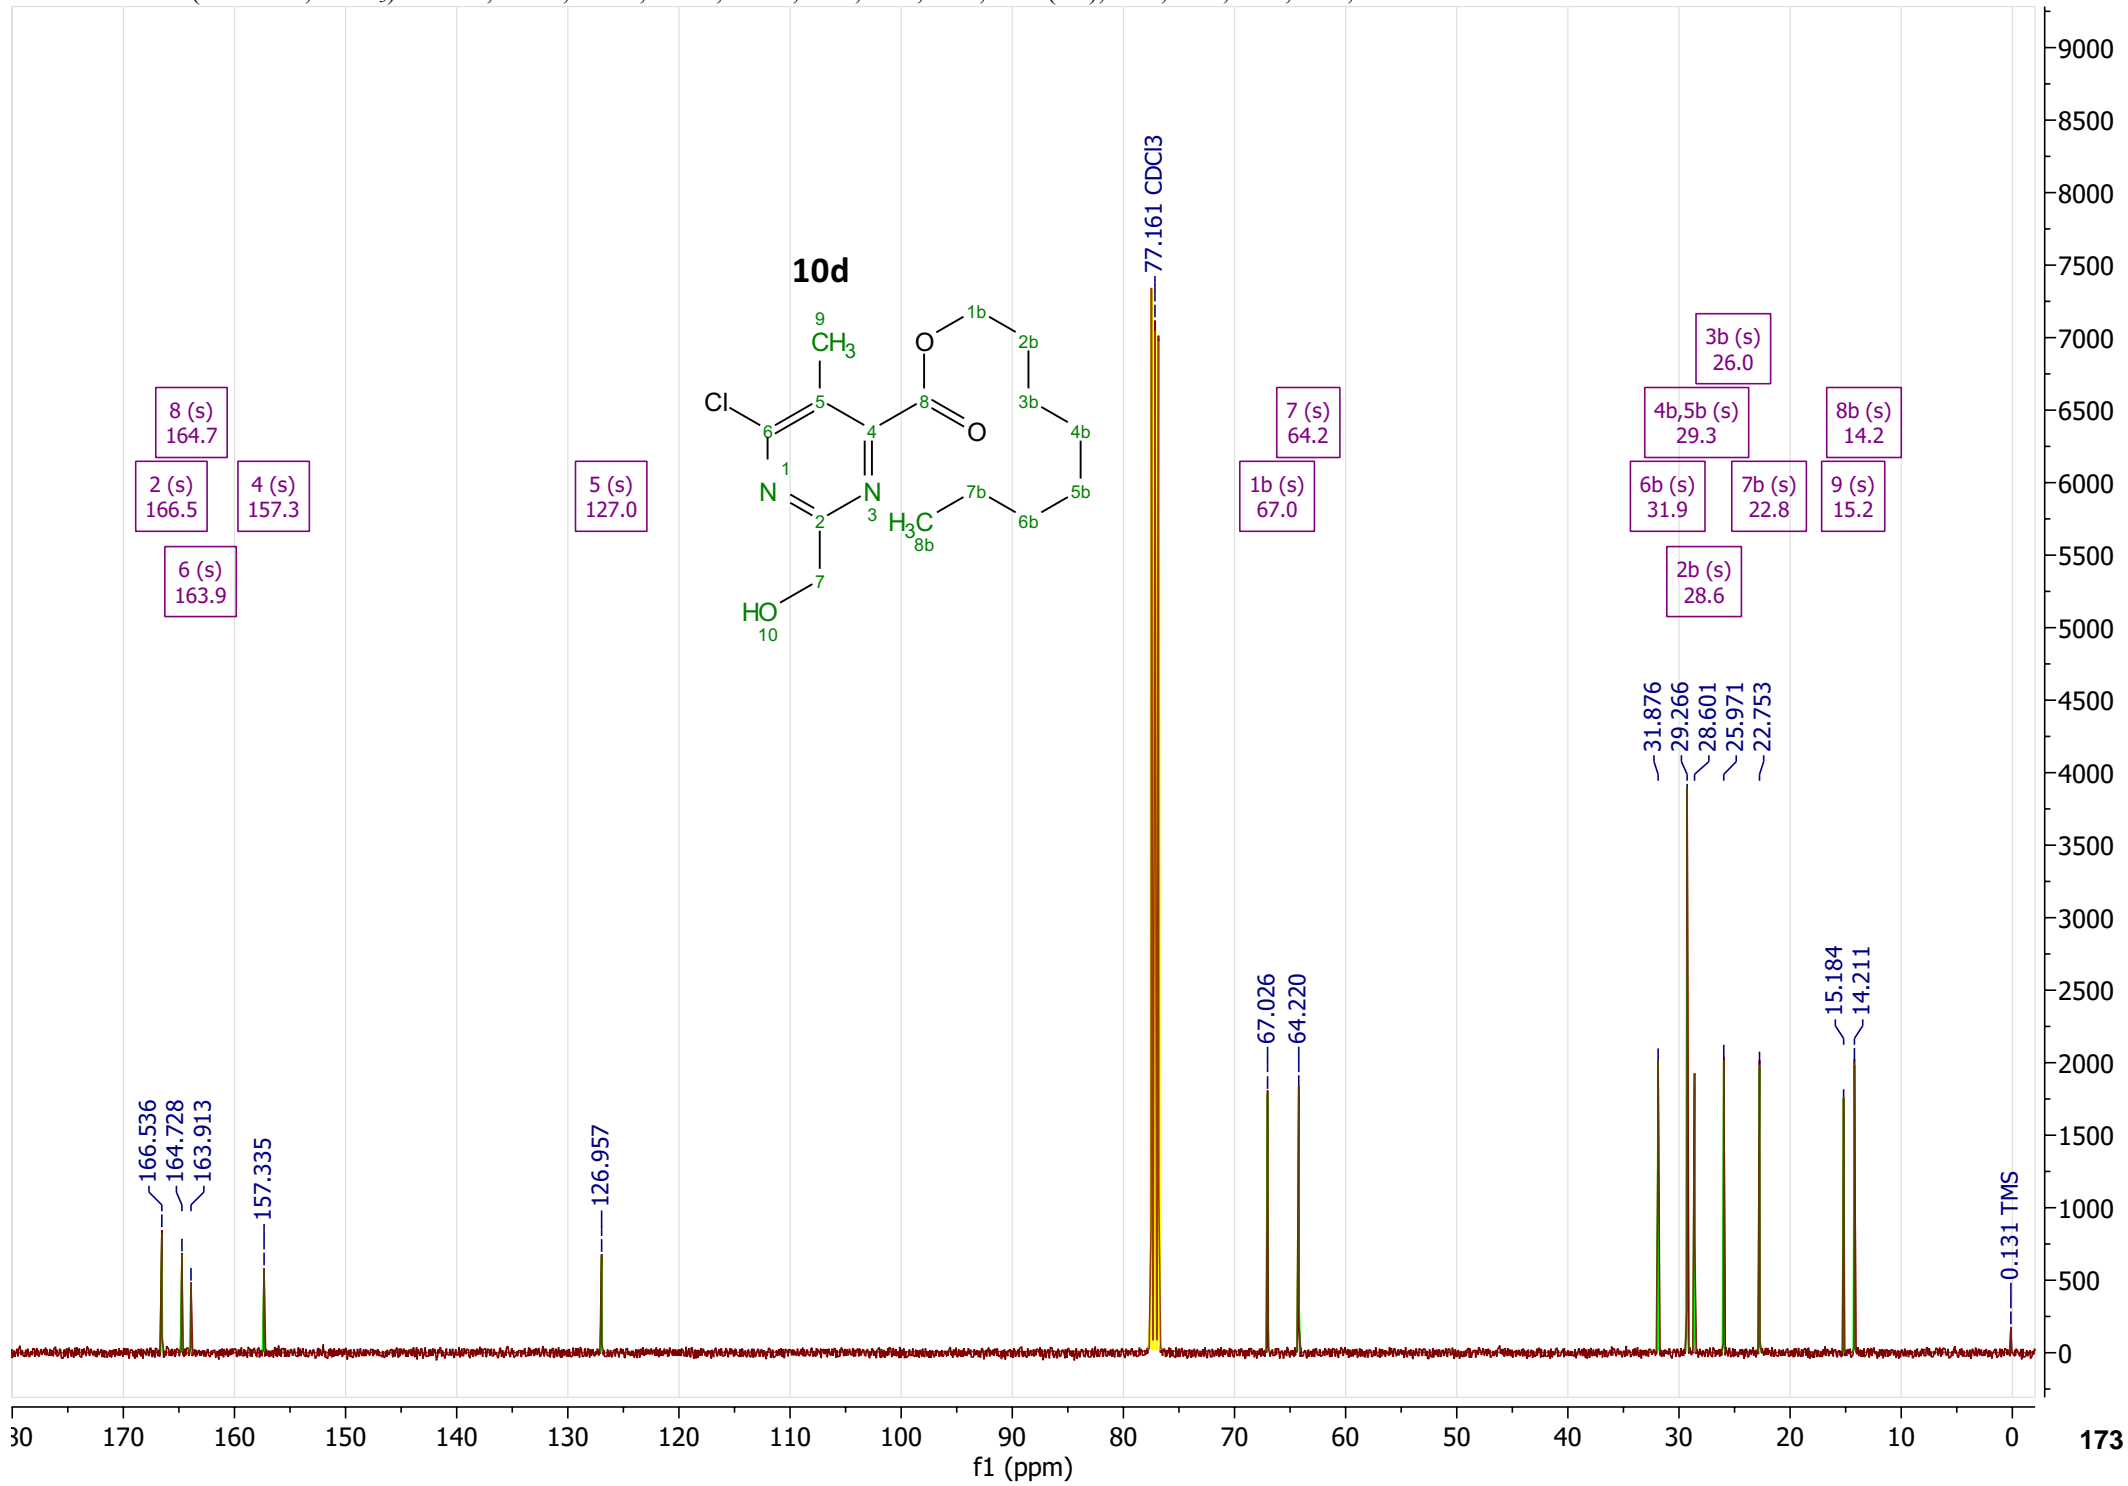

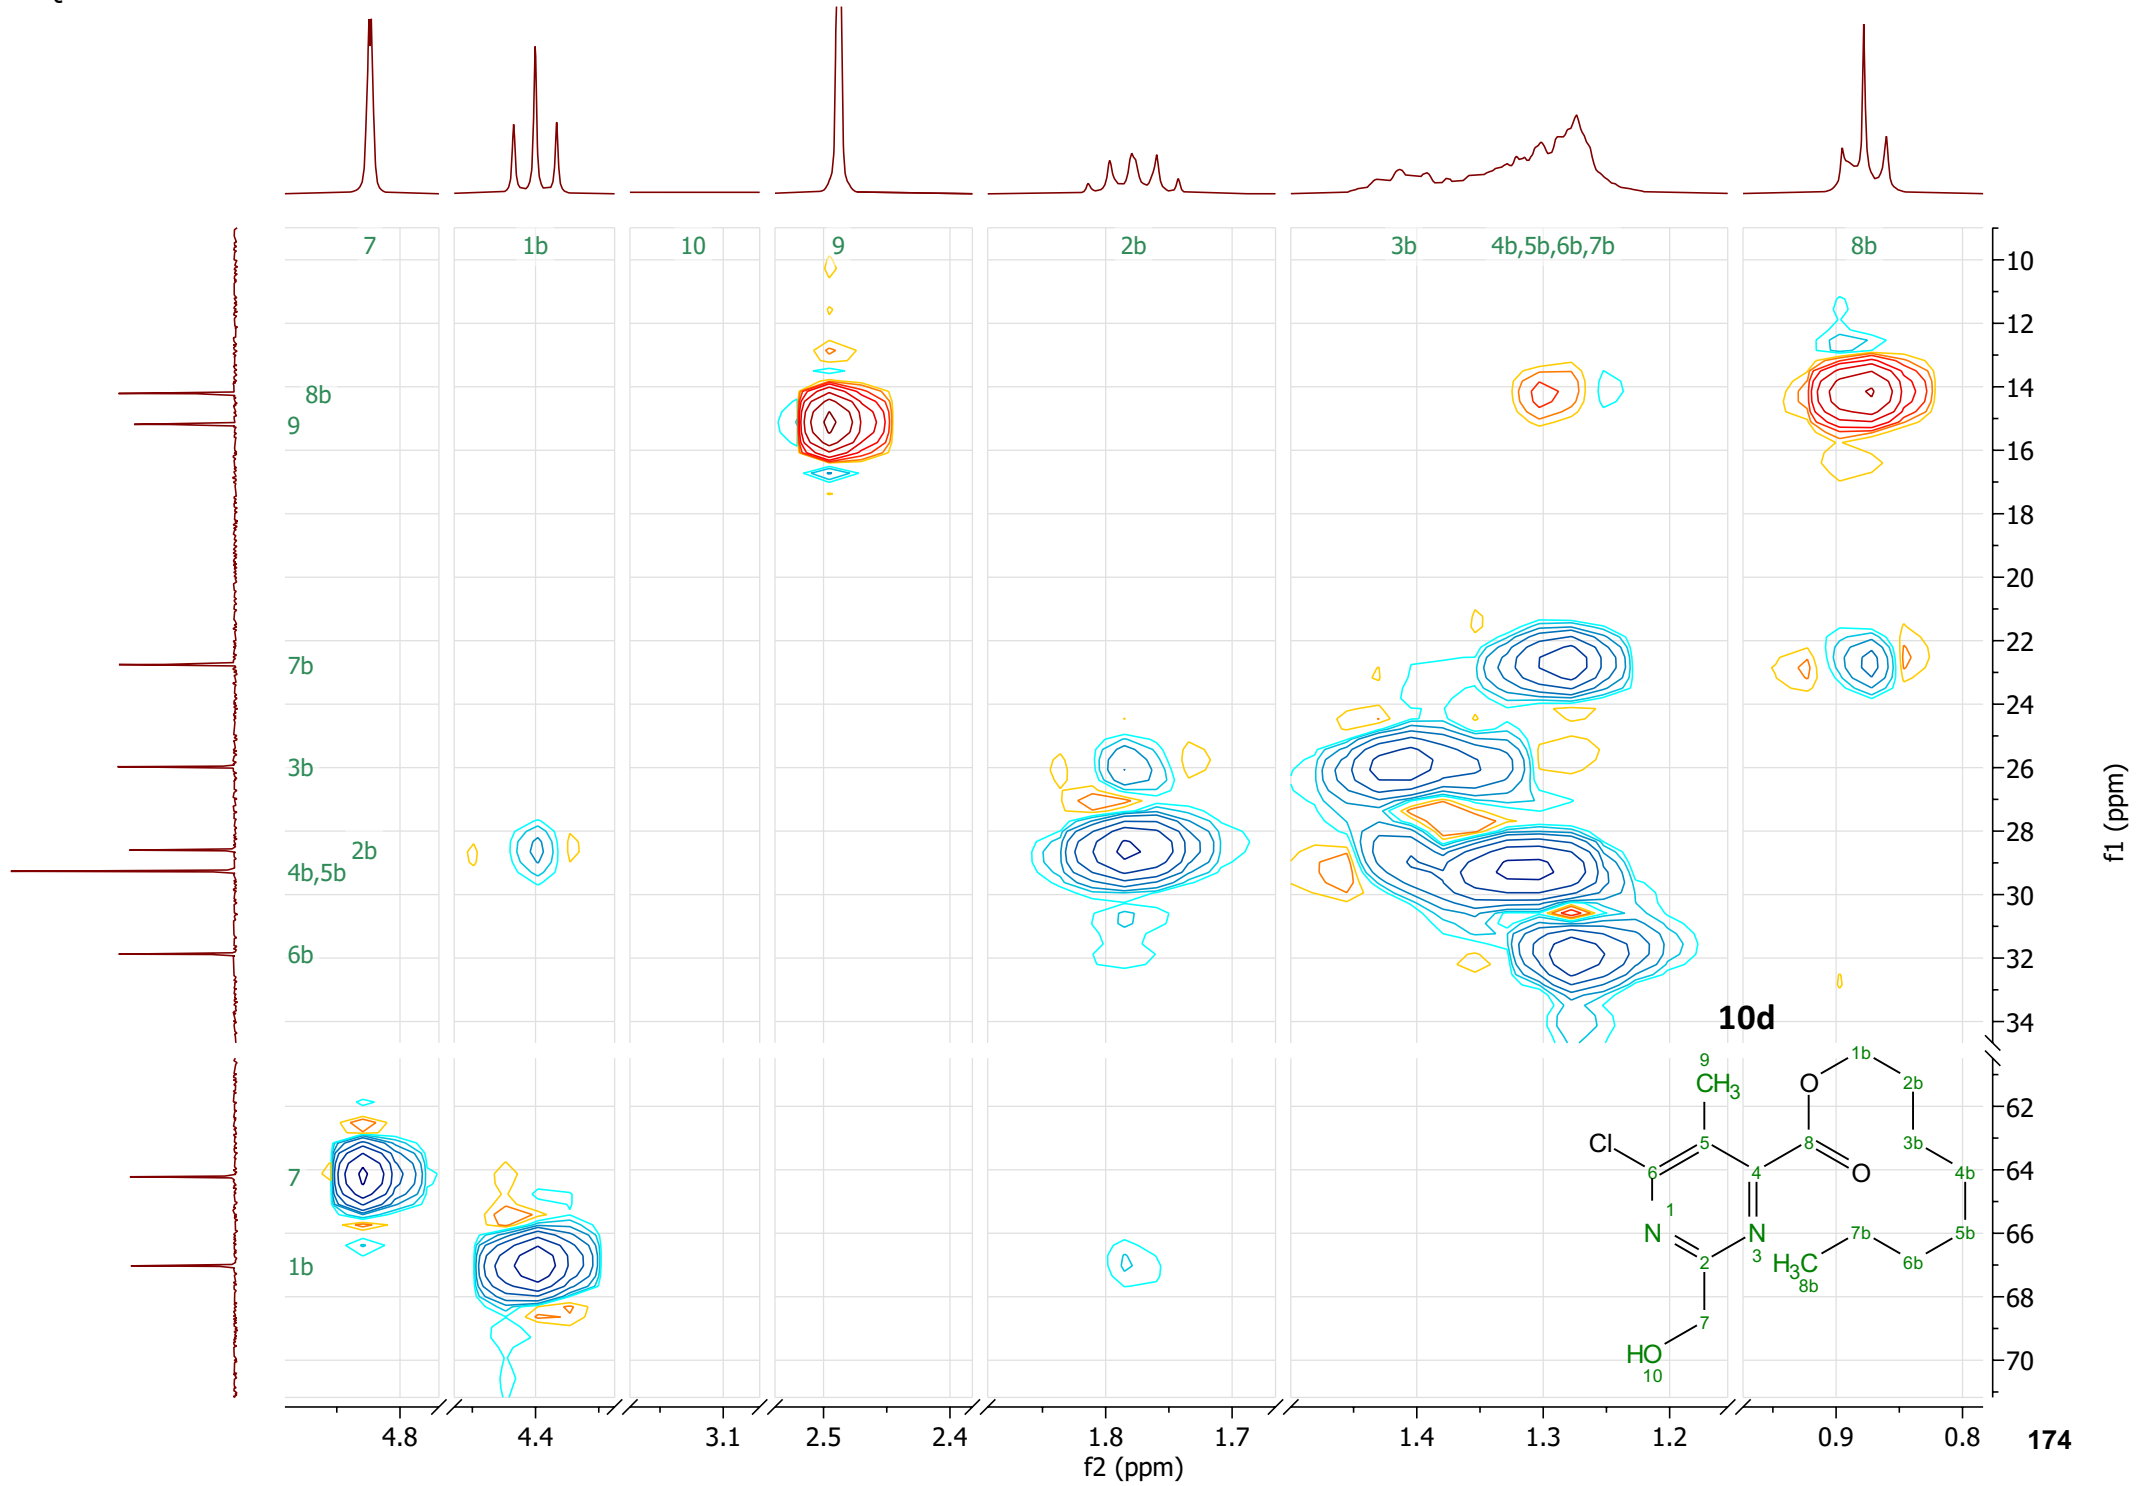

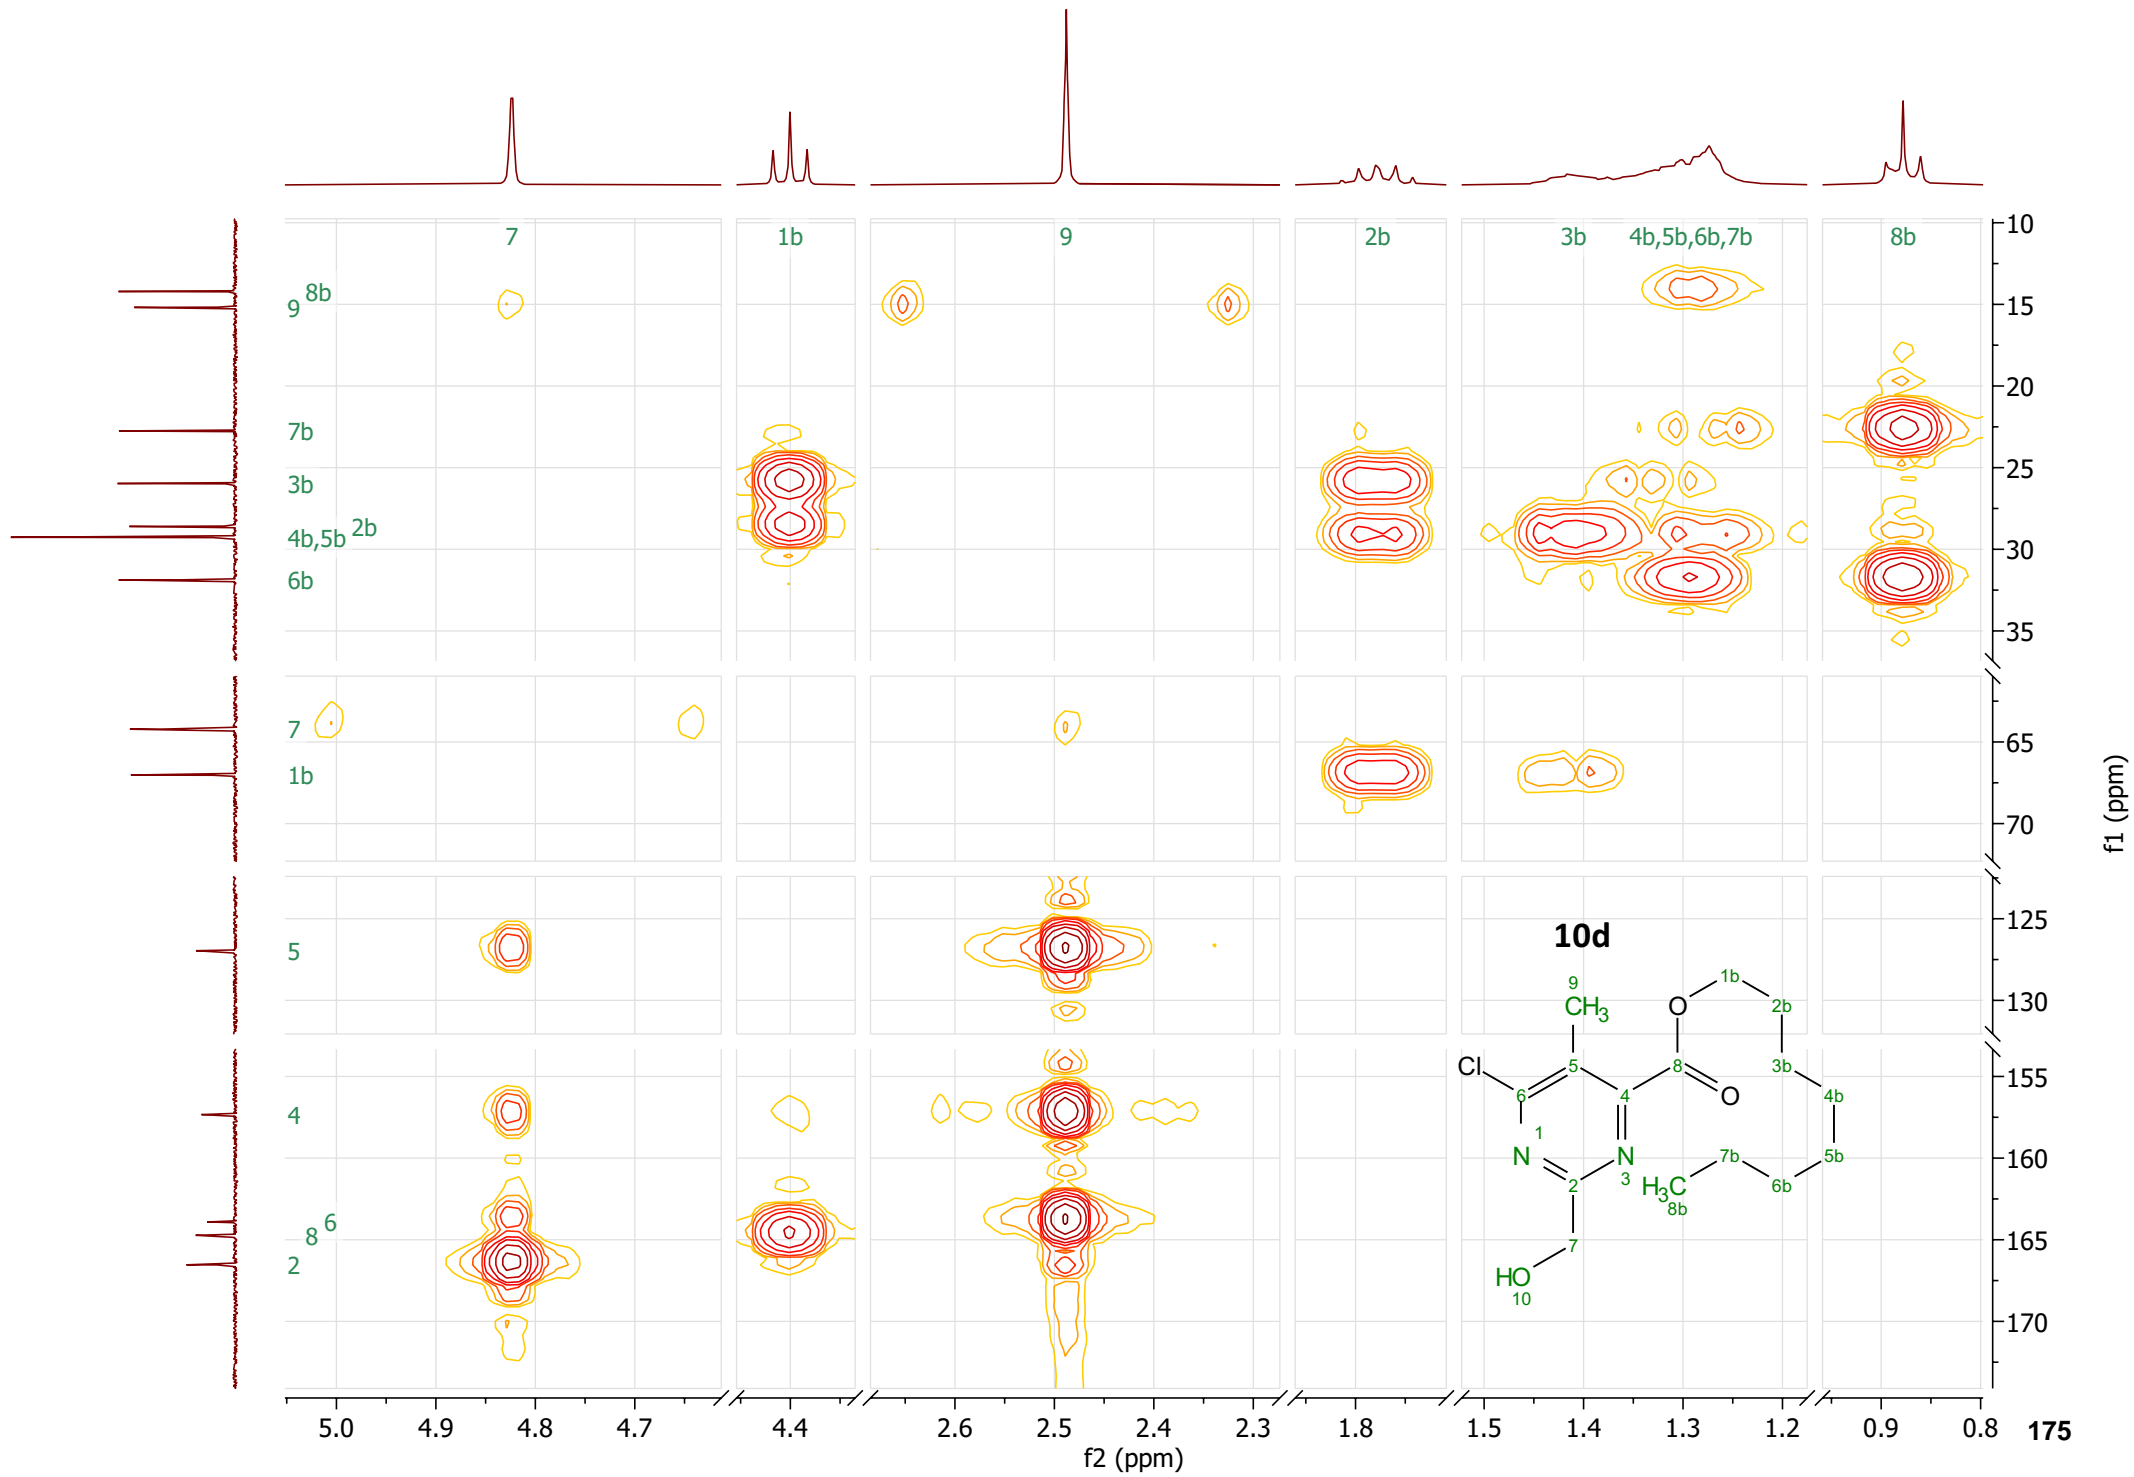

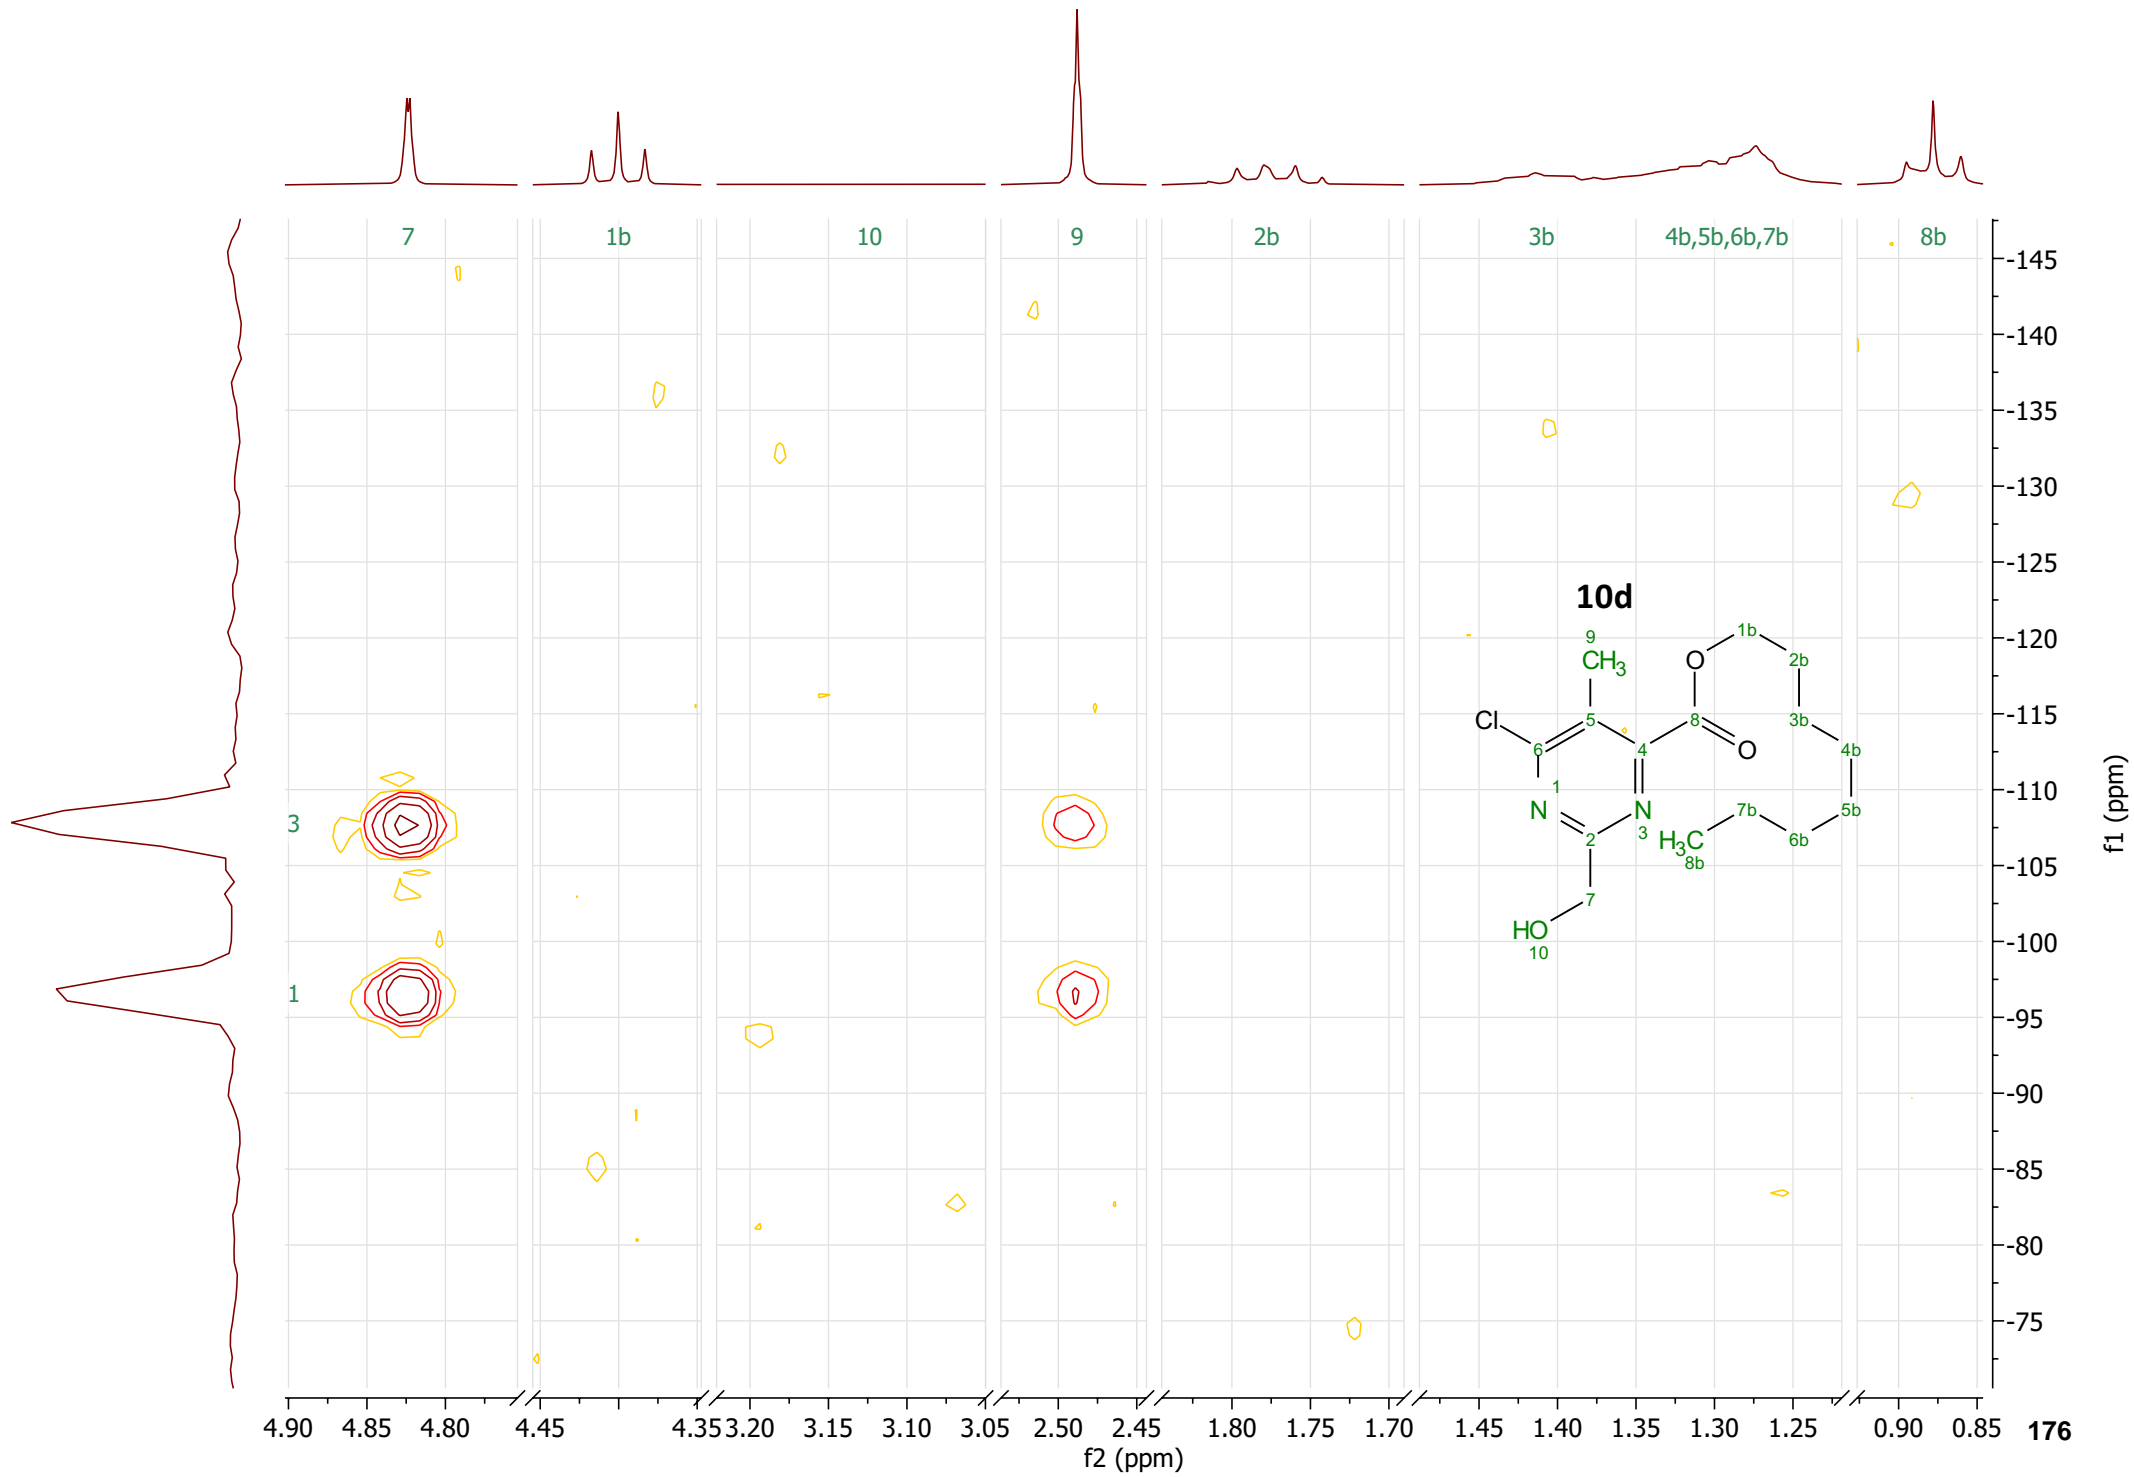



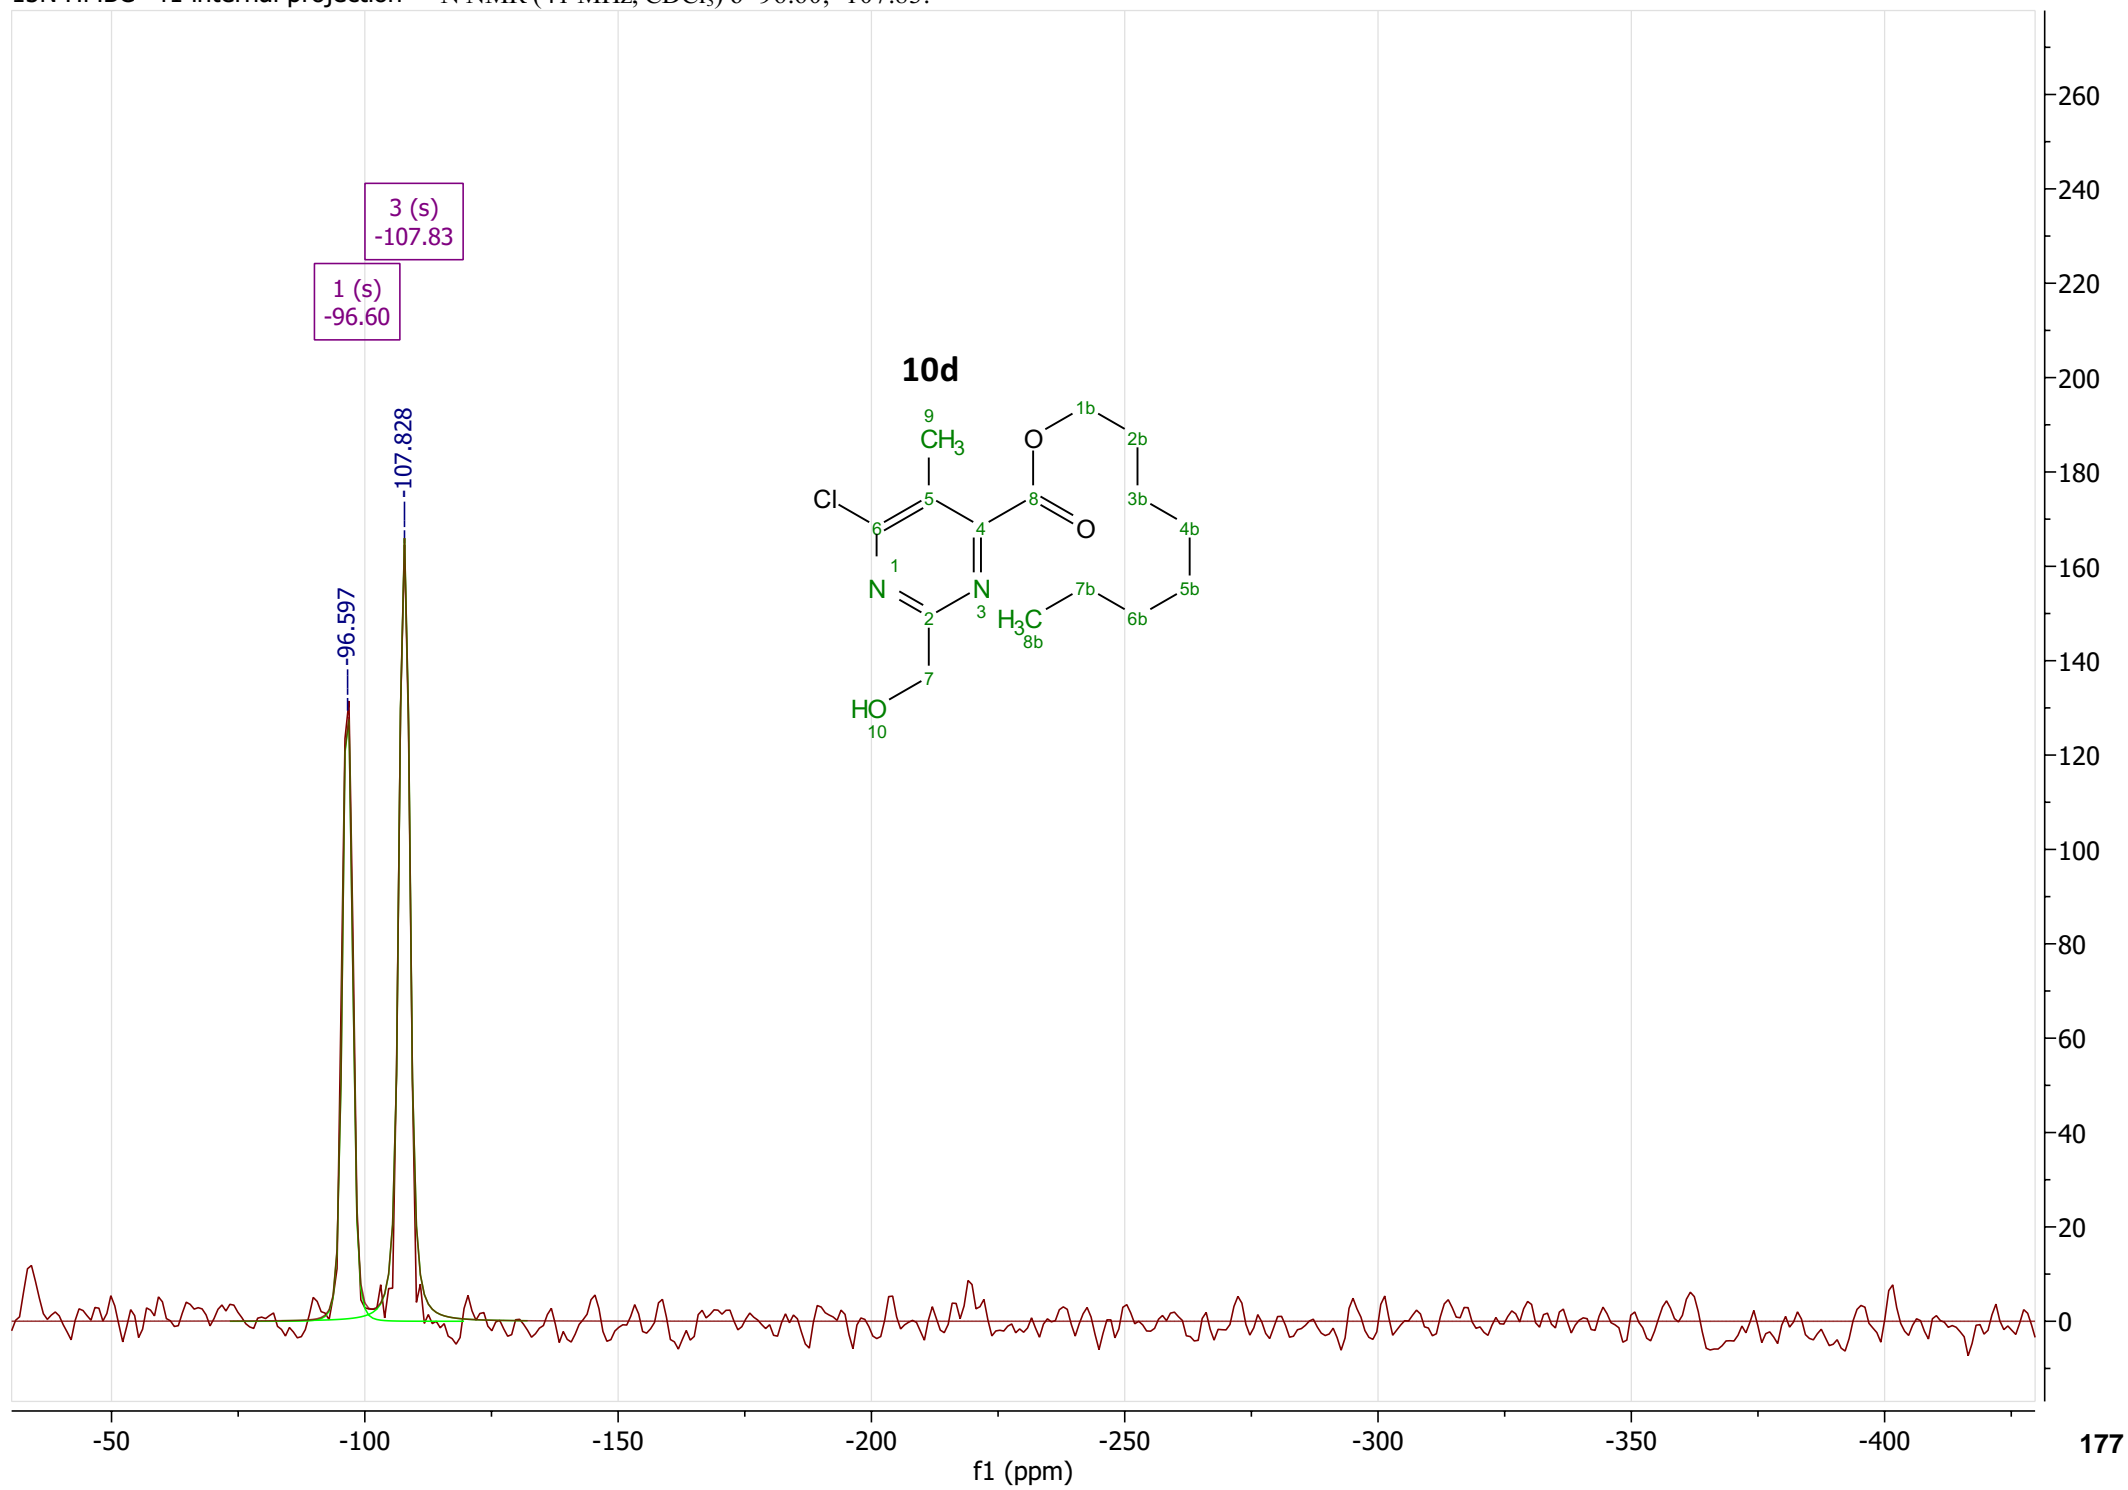

$^1\text{H}$  NMR (400 MHz,  $\text{CDCl}_3$ )  $\delta$  4.83 (app d,  $J = 3.4$  Hz, 2H), 4.40 (t,  $J = 6.8$  Hz, 2H), 3.25 (app t,  $J = 5.0$  Hz, 1H), 2.49 (app t,  $J = 0.8$  Hz, 3H), 1.84 – 1.72 (m, 2H), 1.47 – 1.36 (m, 2H), 1.38 – 1.19 (m, 10H), 0.88 (app t,  $J = 7.0$  Hz, 3H).

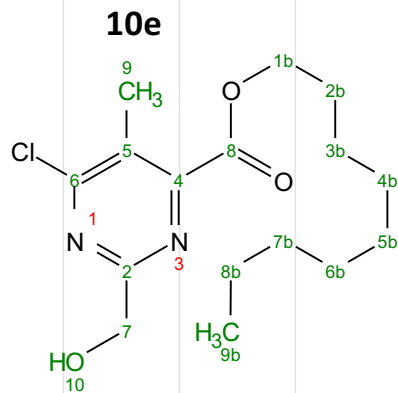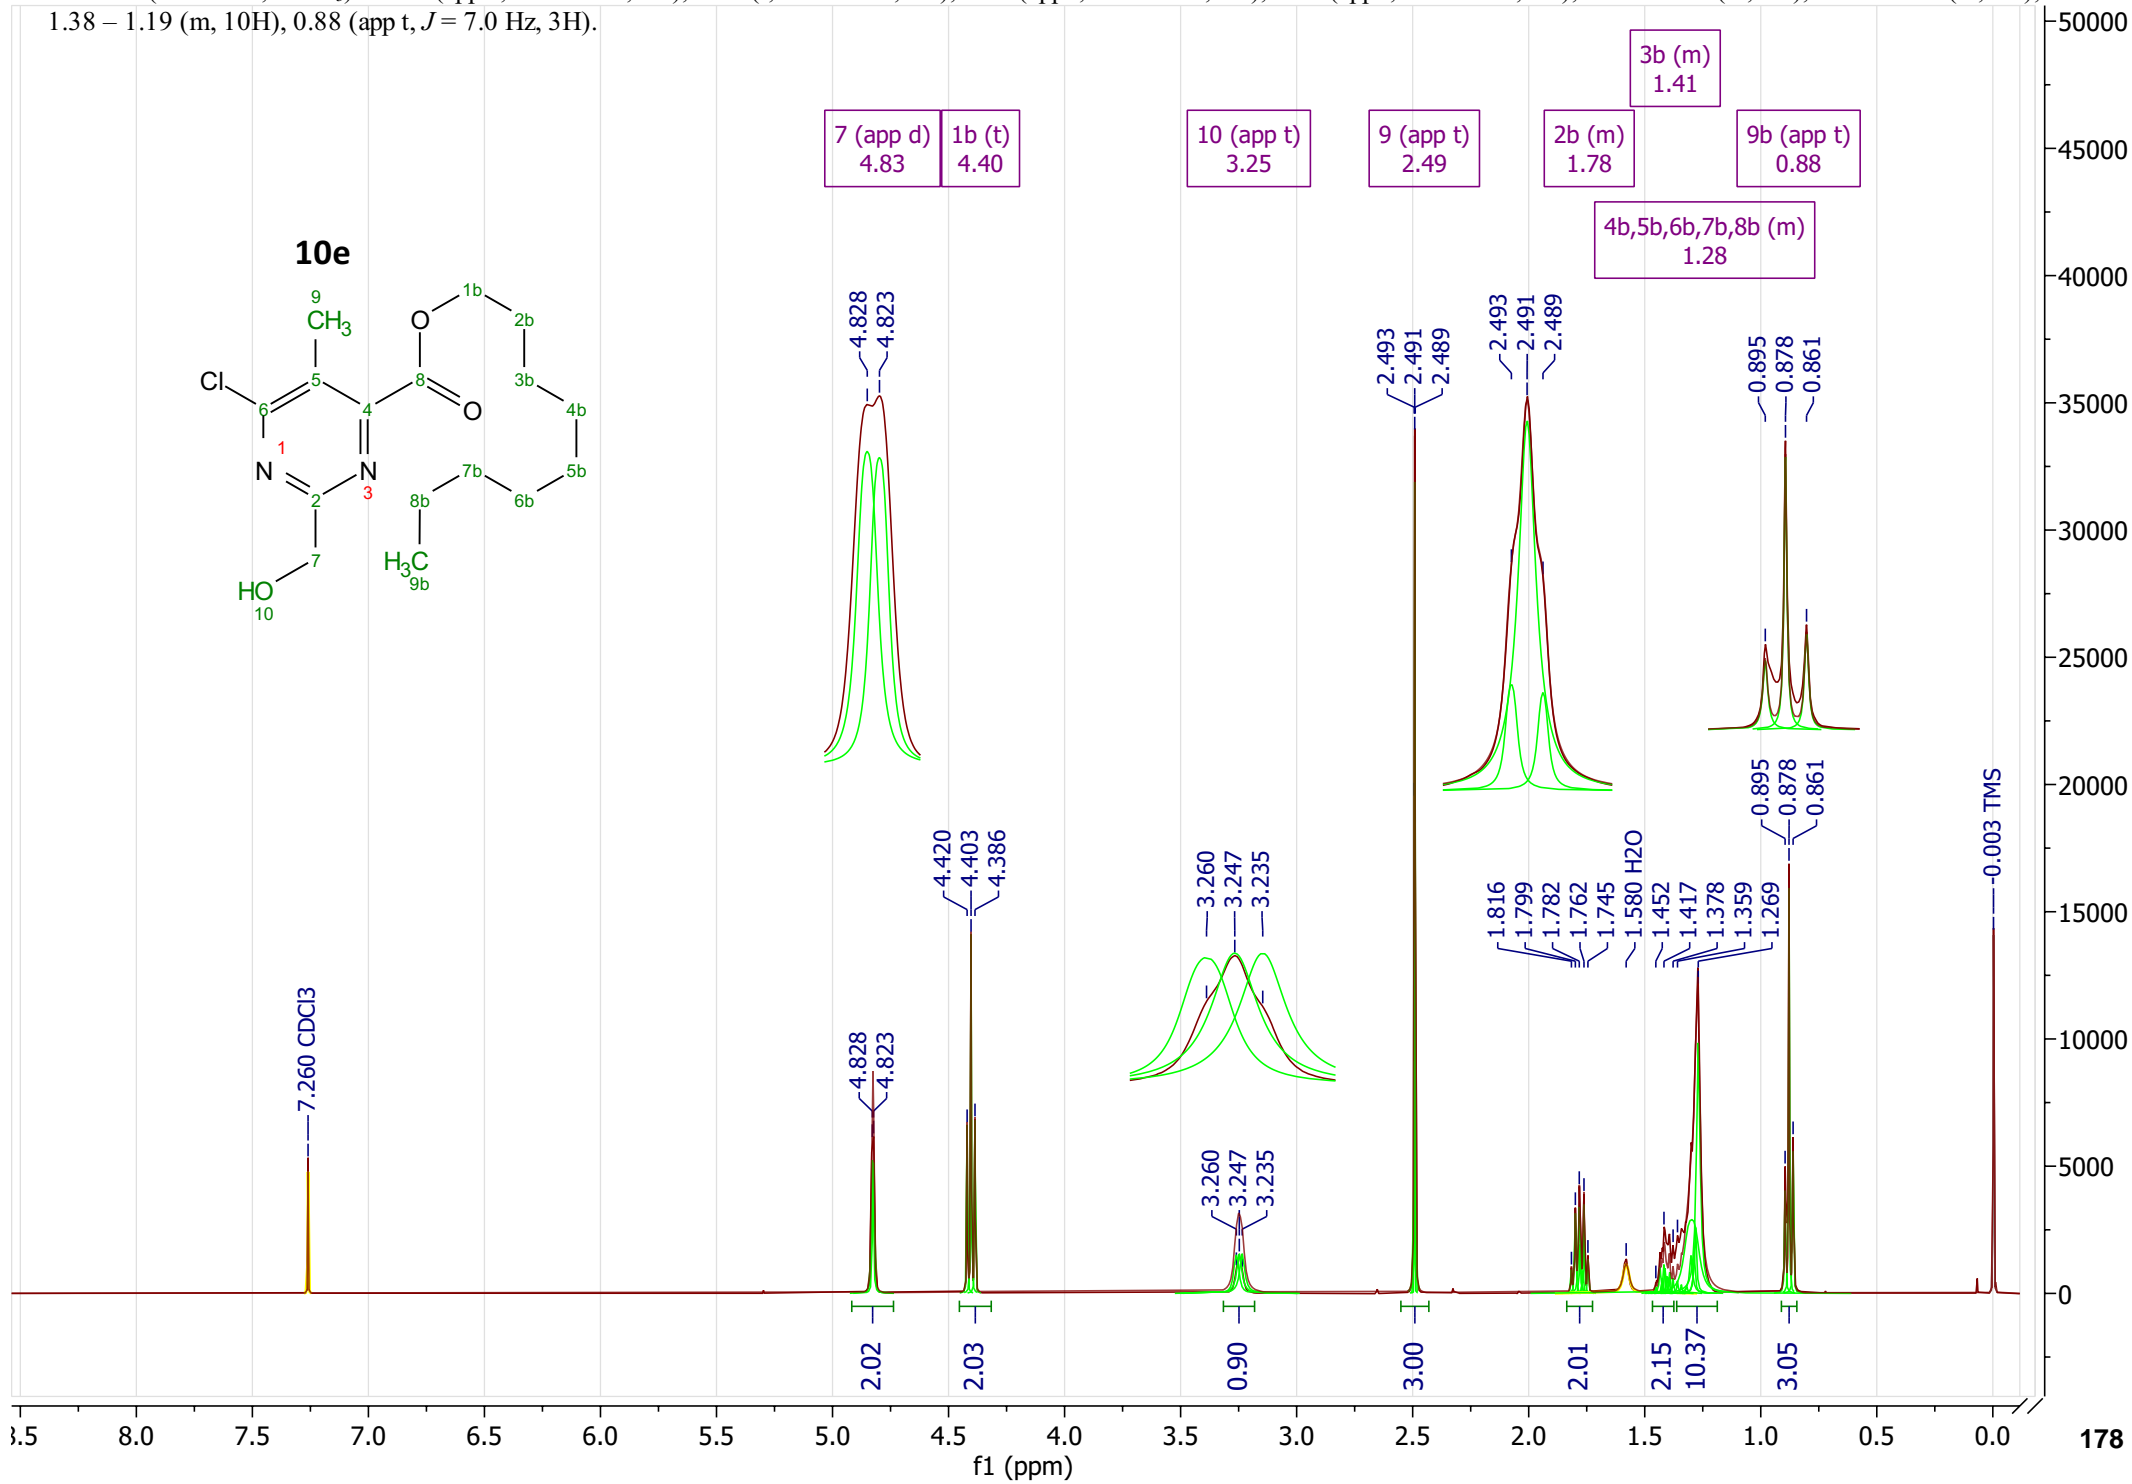

<sup>13</sup>C NMR (101 MHz, CDCl<sub>3</sub>) δ 166.5, 164.7, 163.9, 157.3, 127.0, 67.0, 64.2, 32.0, 29.6, 29.32, 28.6, 26.0, 22.8, 15.2, 14.2.

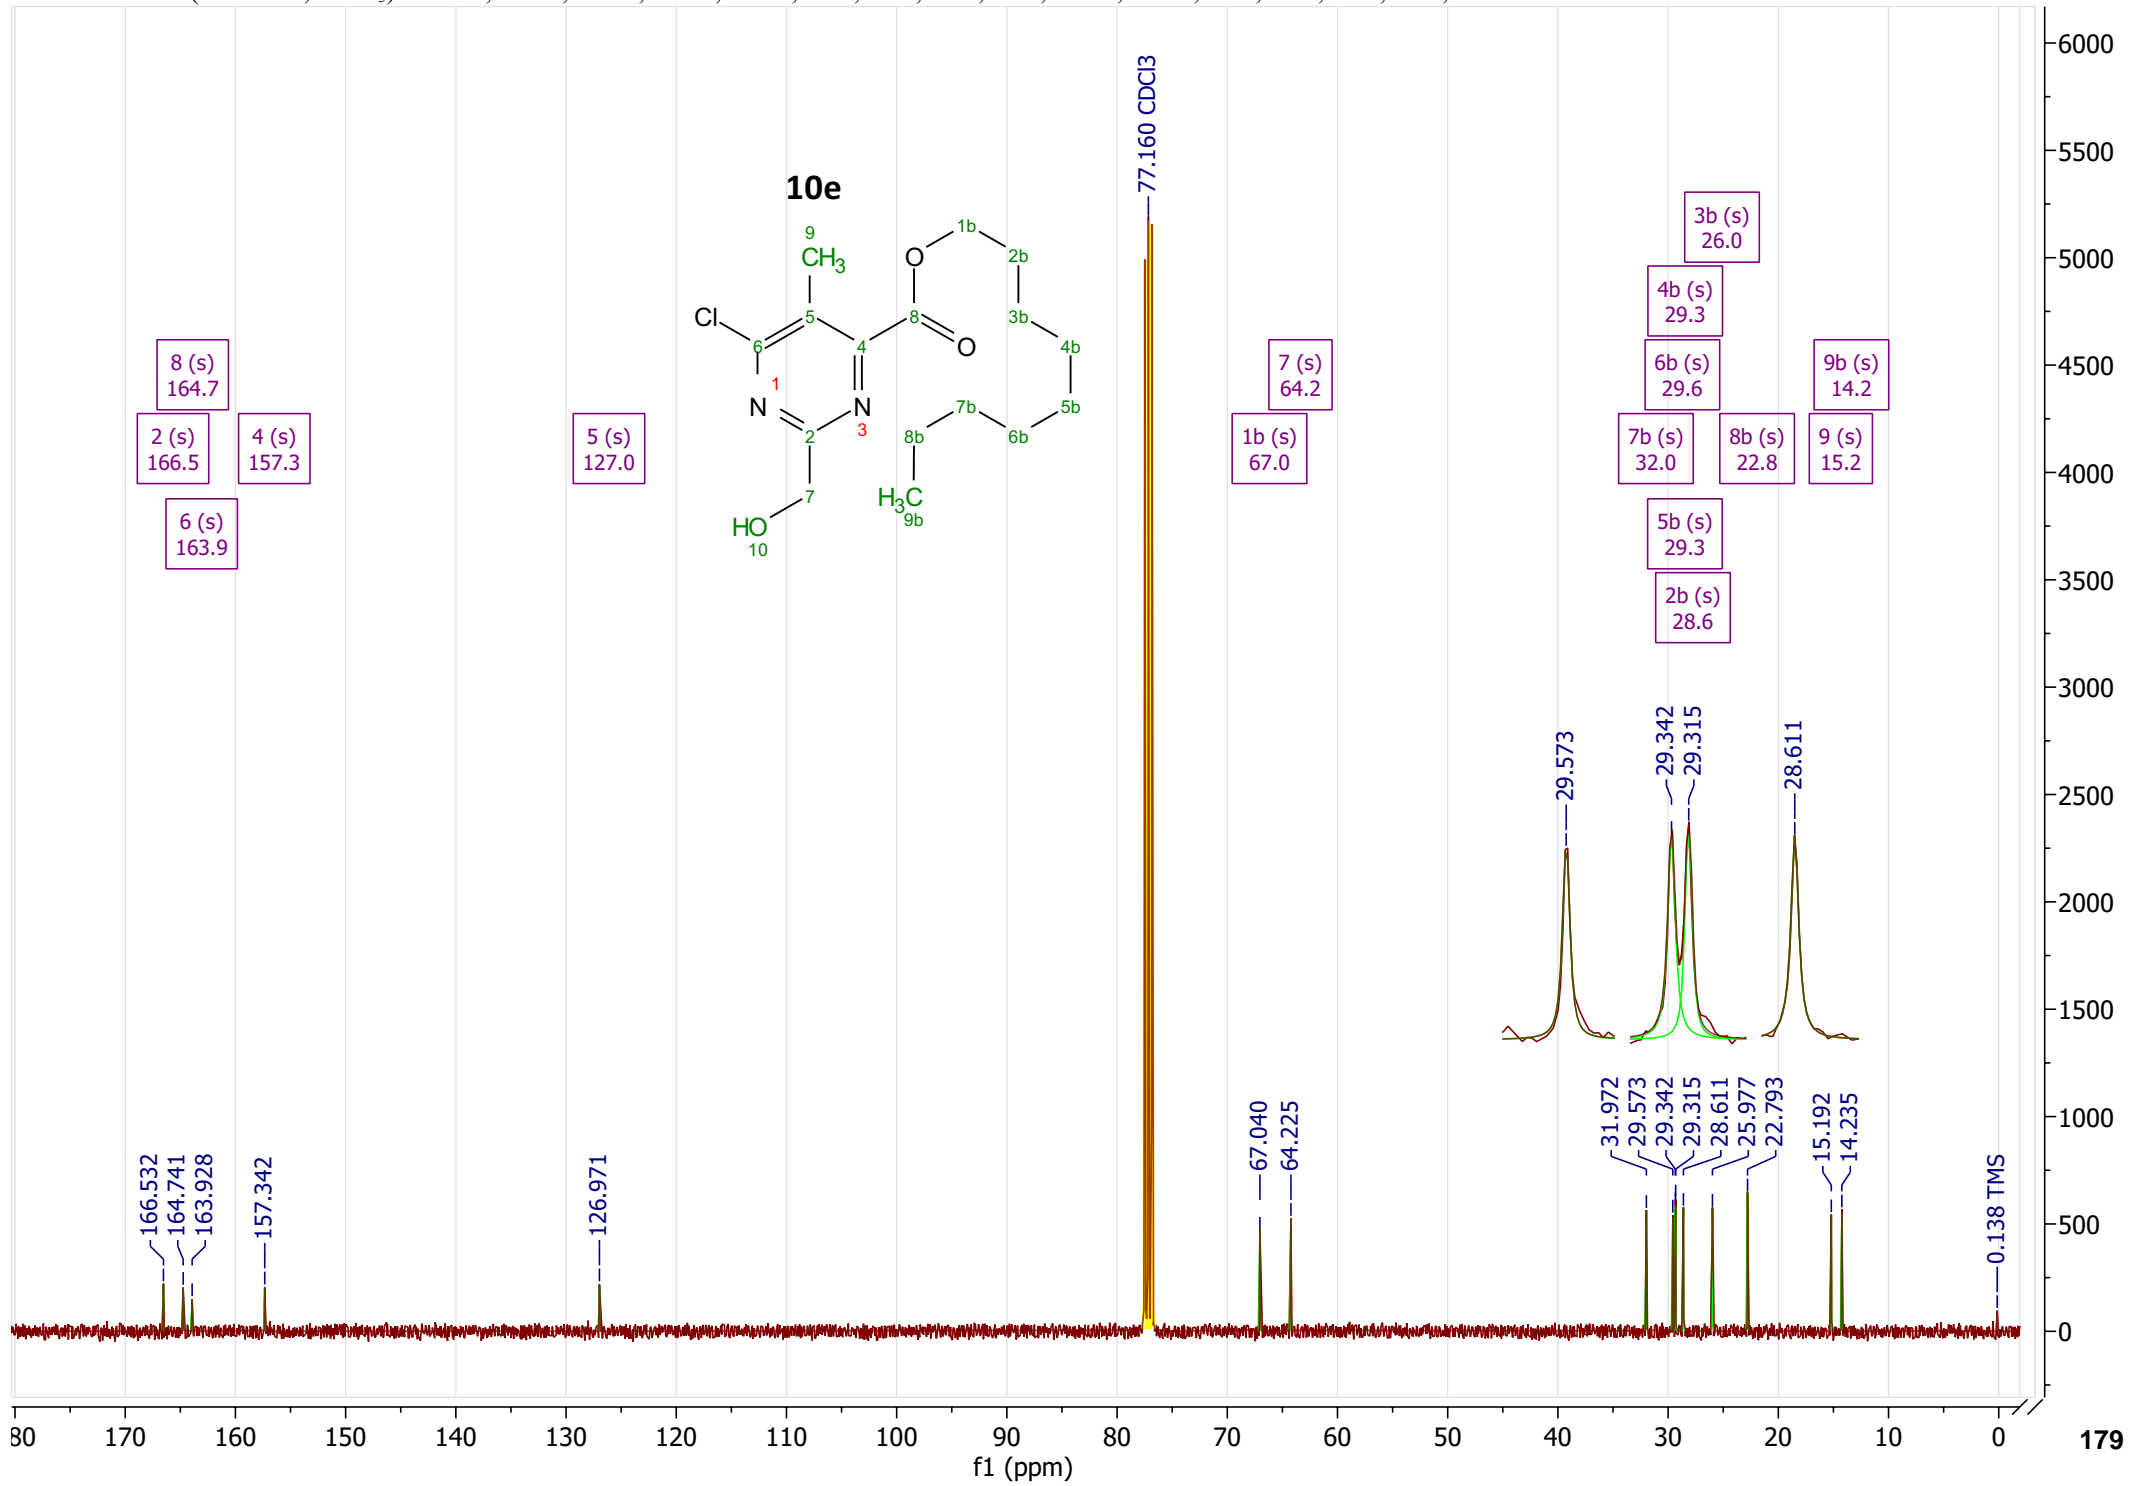

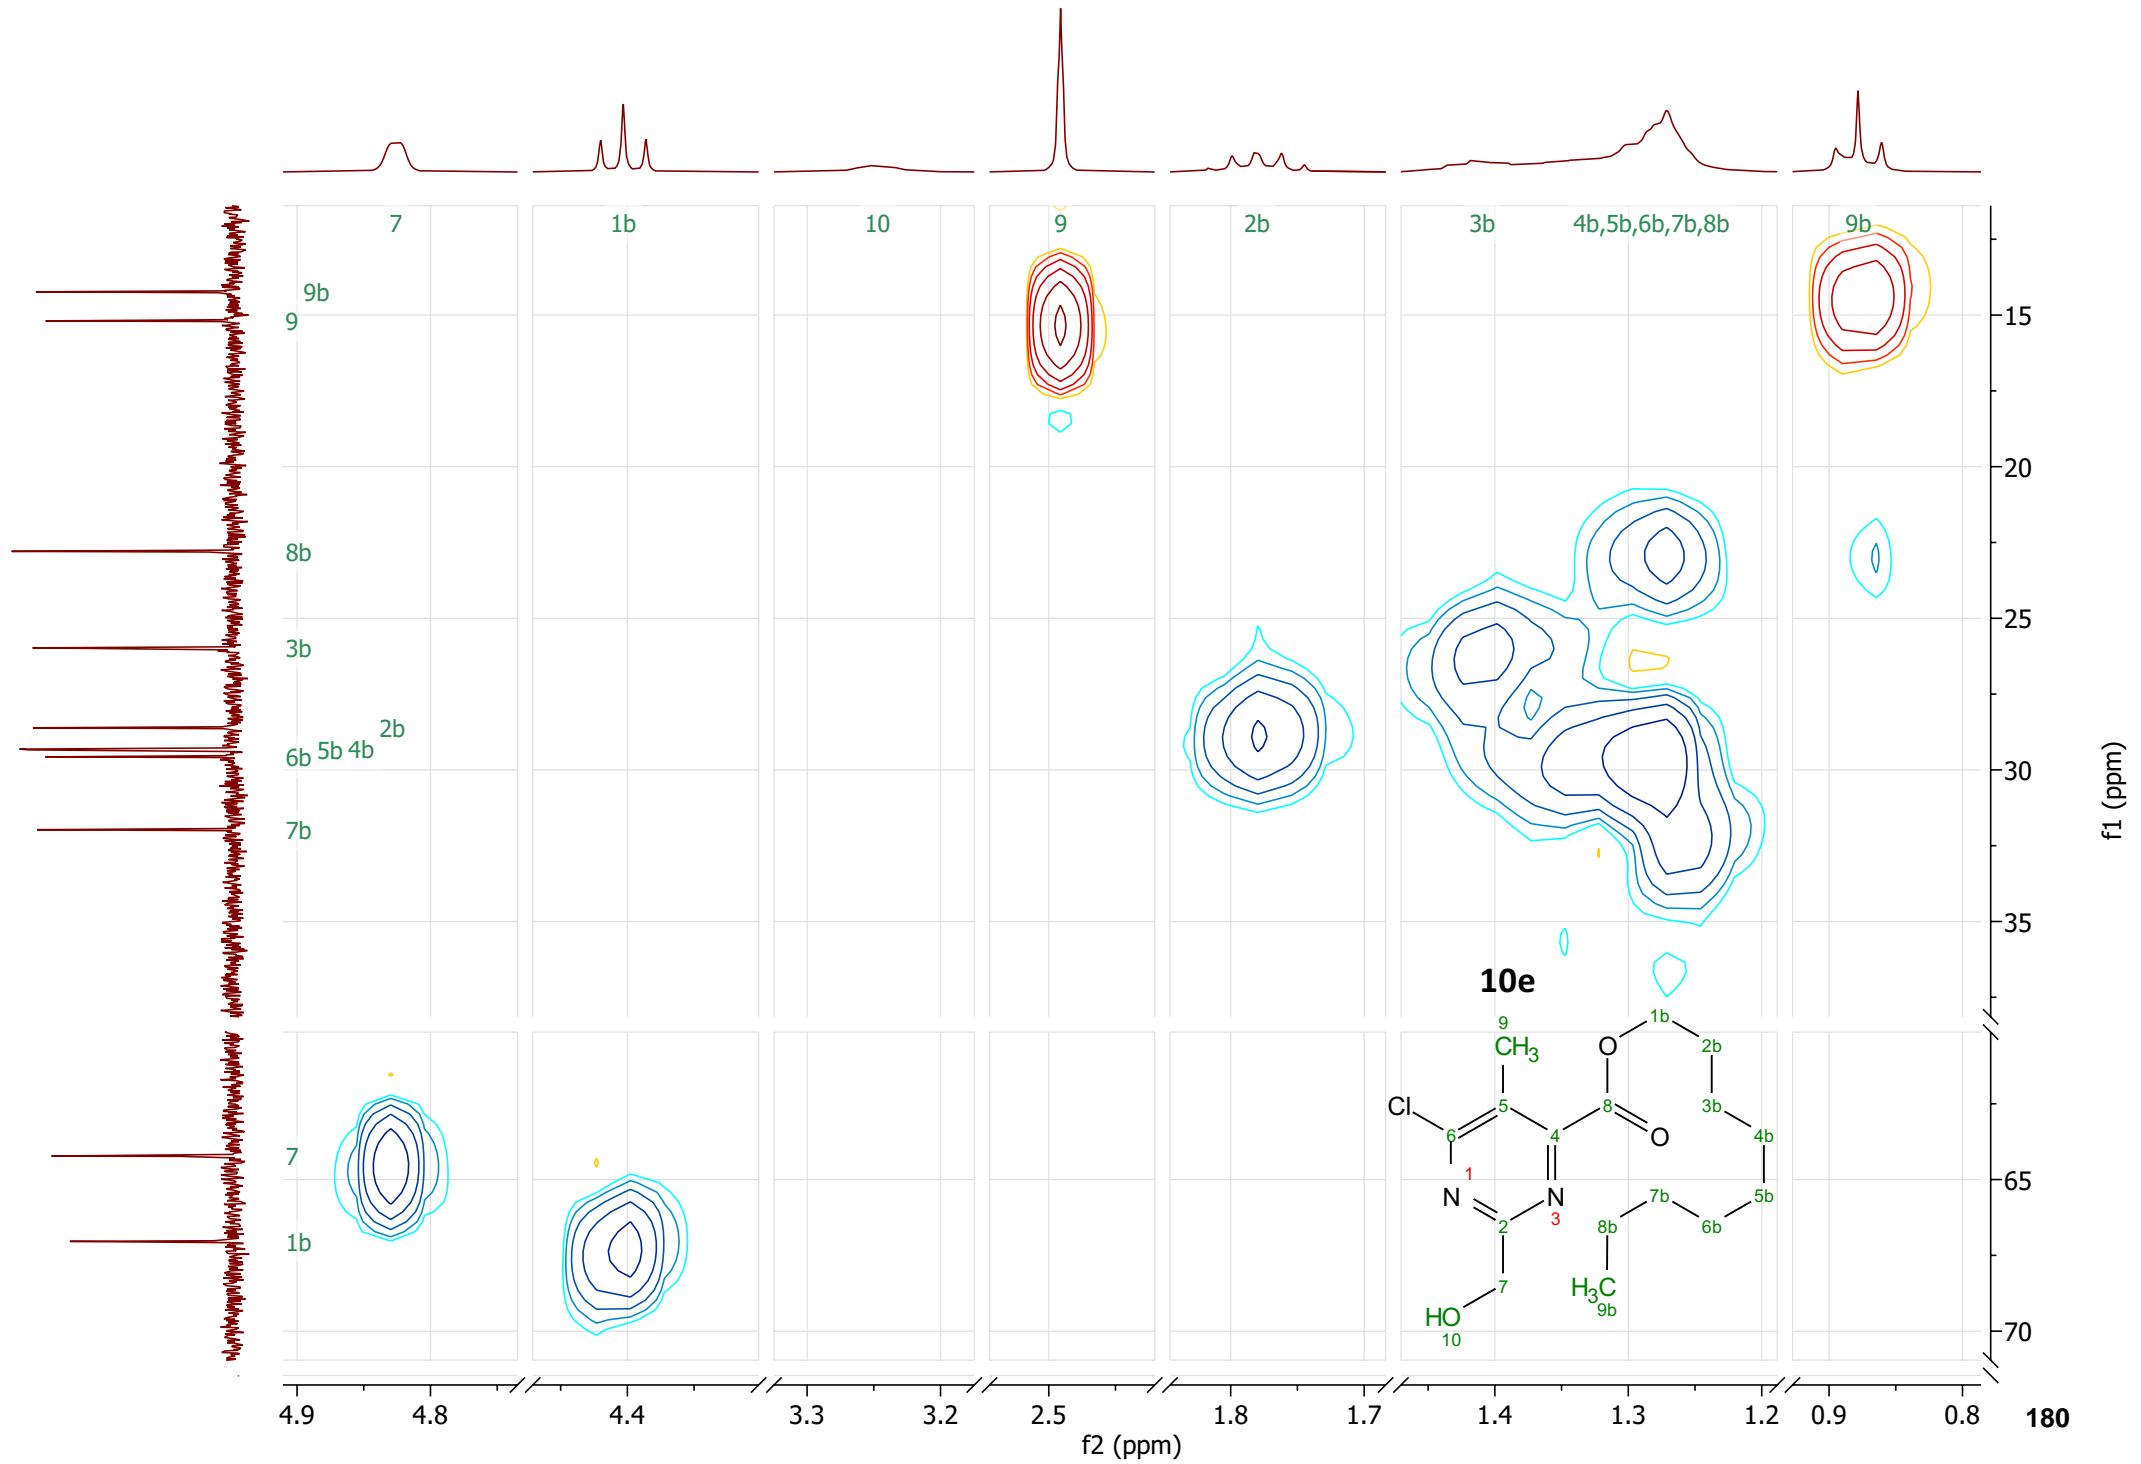

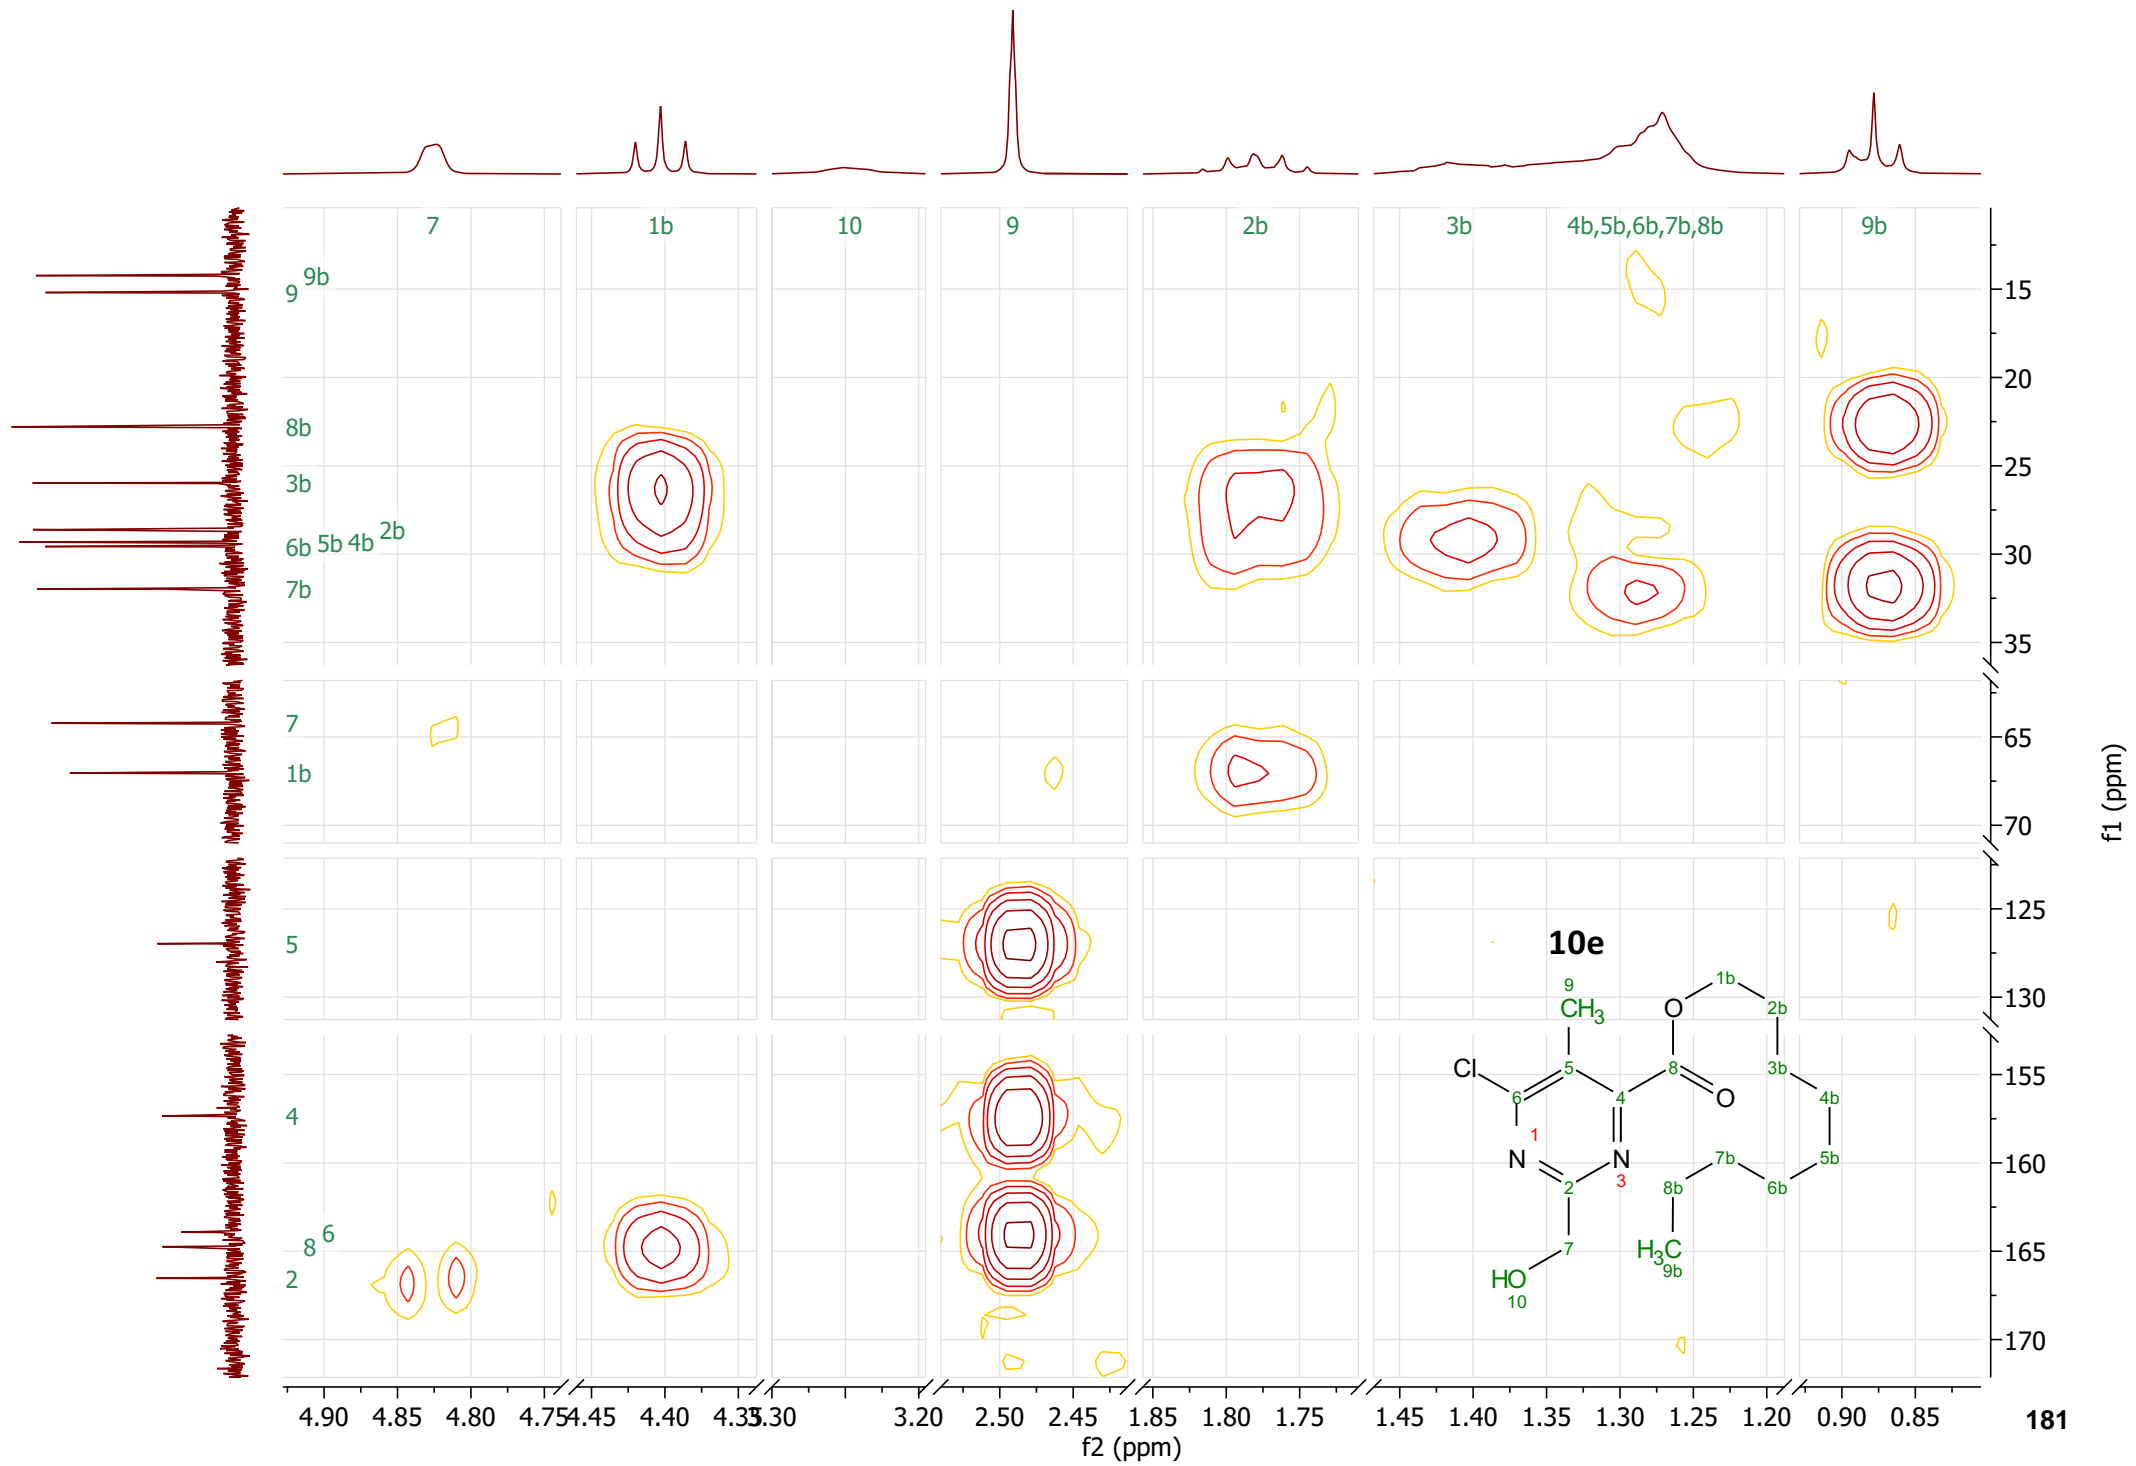

$^1\text{H}$  NMR (400 MHz,  $\text{CDCl}_3$ )  $\delta$  7.74 – 7.69 (m, 1H), 7.68 – 7.64 (m, 1H), 7.64 – 7.61 (m, 1H), 7.58 – 7.49 (m, 1H), 5.48 (s, 2H), 4.83 (app q,  $J = 0.8$  Hz, 2H), 3.15 (br s, 1H), 2.48 (app t,  $J = 0.8$  Hz, 3H).

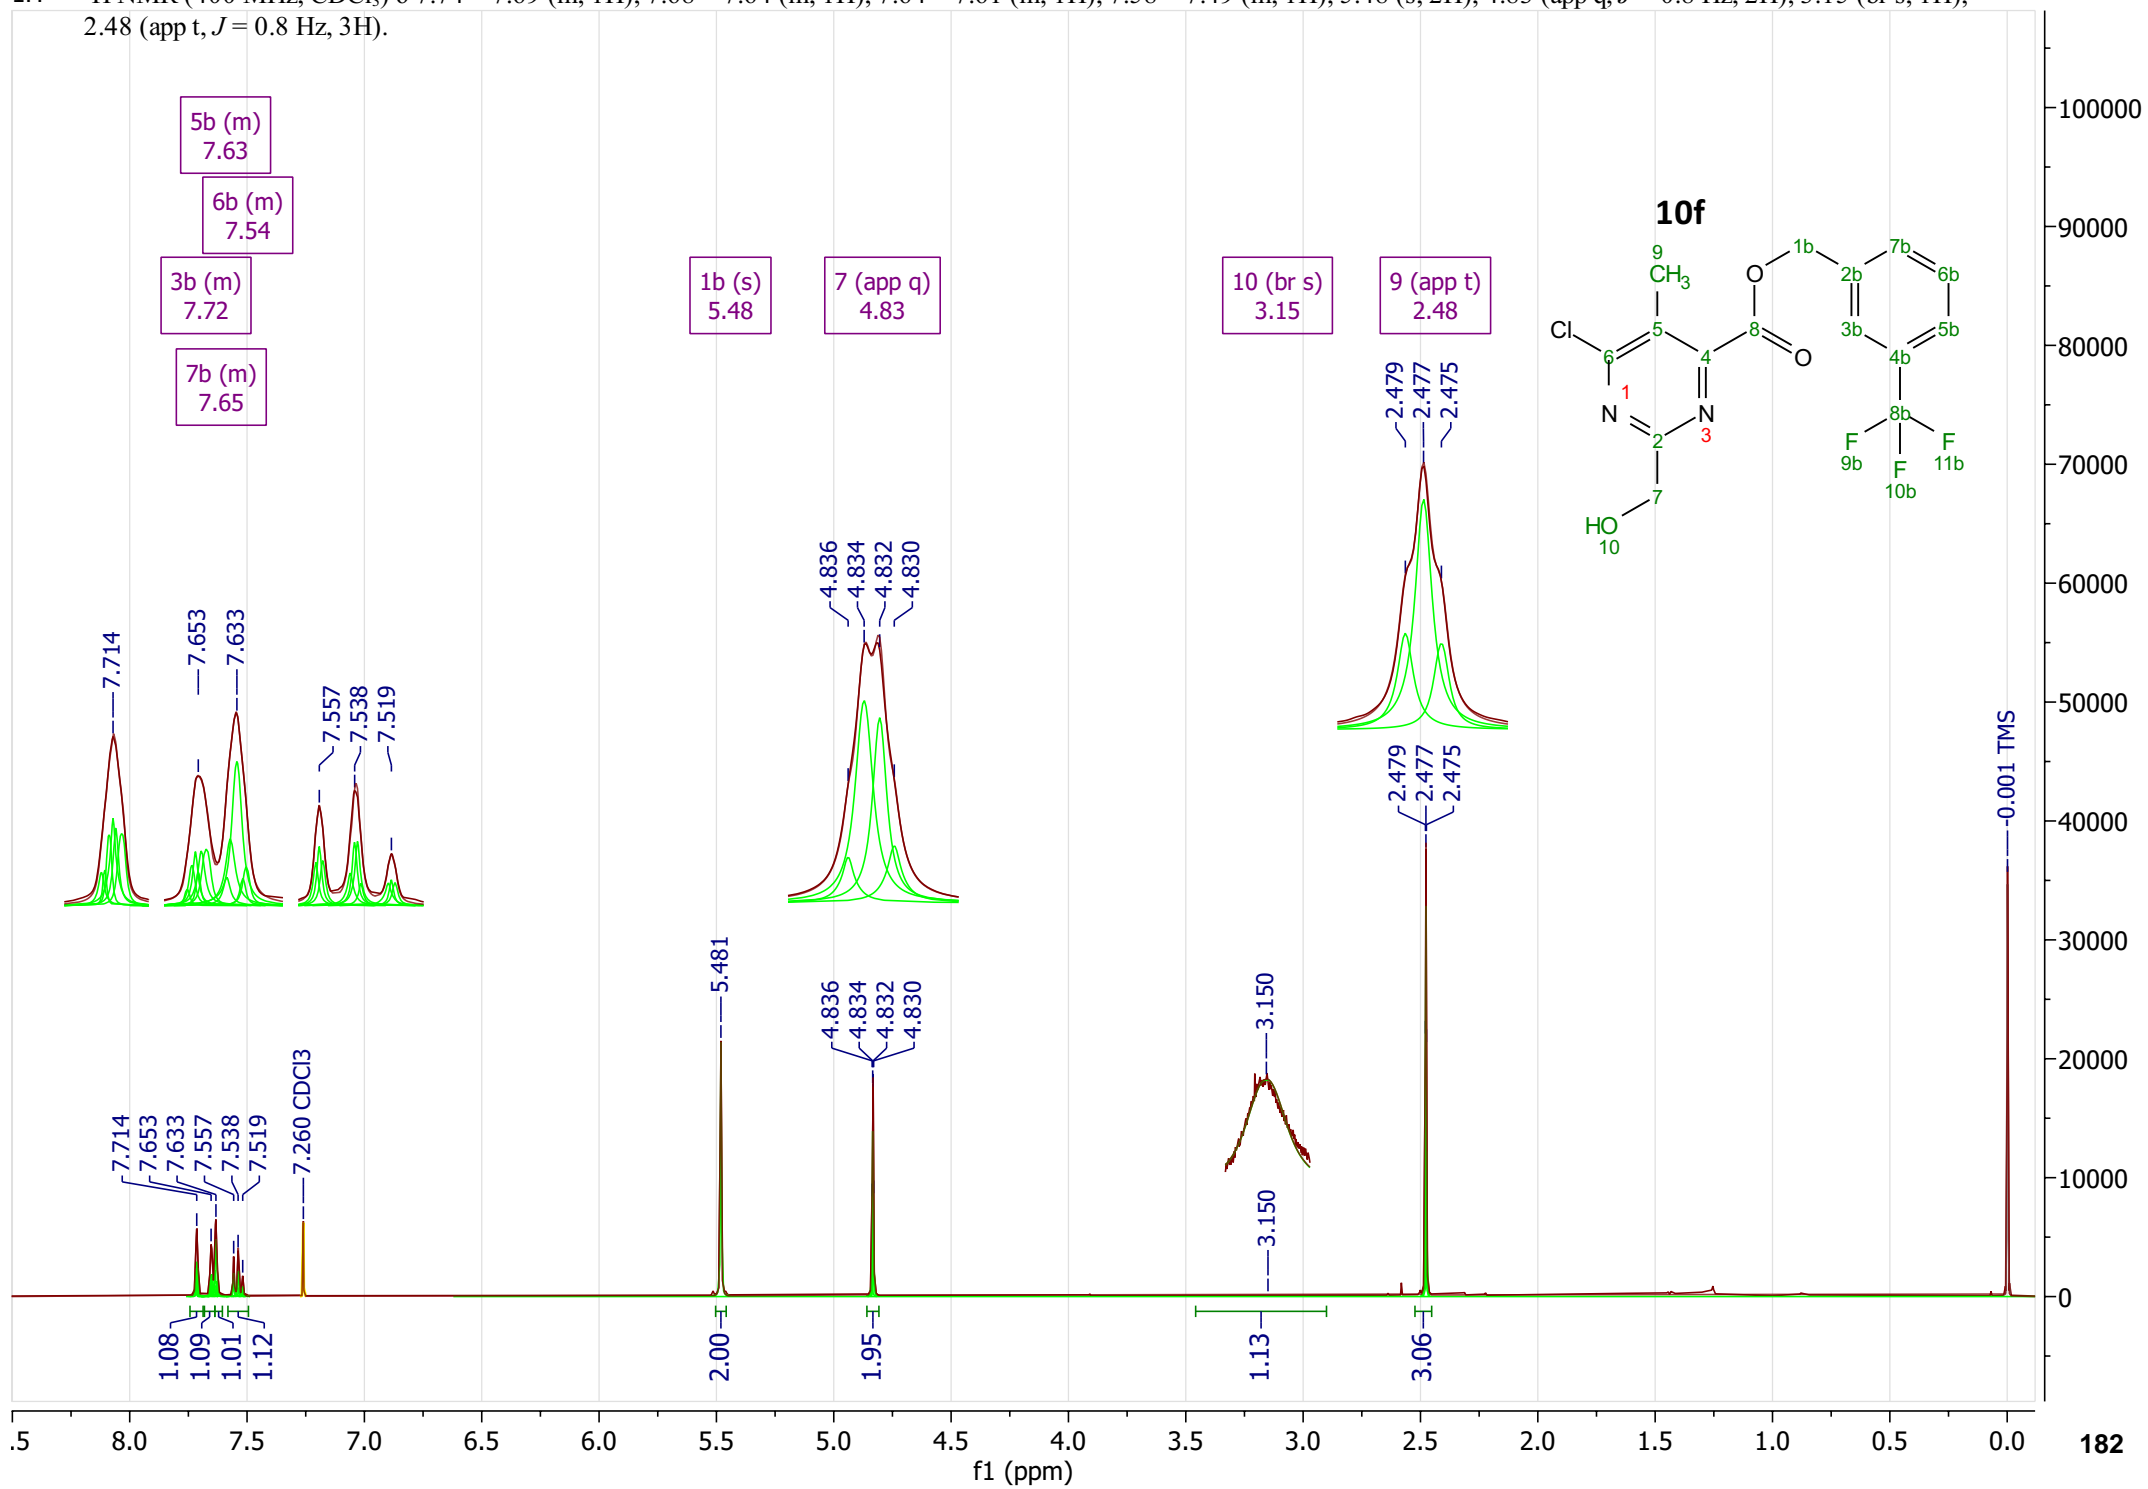

<sup>13</sup>C NMR (101 MHz, CDCl<sub>3</sub>) δ 166.6, 164.24, 164.19, 156.3, 135.8, 131.8 (q, *J* = 1.1 Hz), 131.4 (q, *J* = 32.7 Hz), 129.5, 127.5, 125.8 (q, *J* = 3.7 Hz), 125.3 (q, *J* = 4.0 Hz), 124.0 (q, *J* = 272.4 Hz), 67.3, 64.2, 15.2.

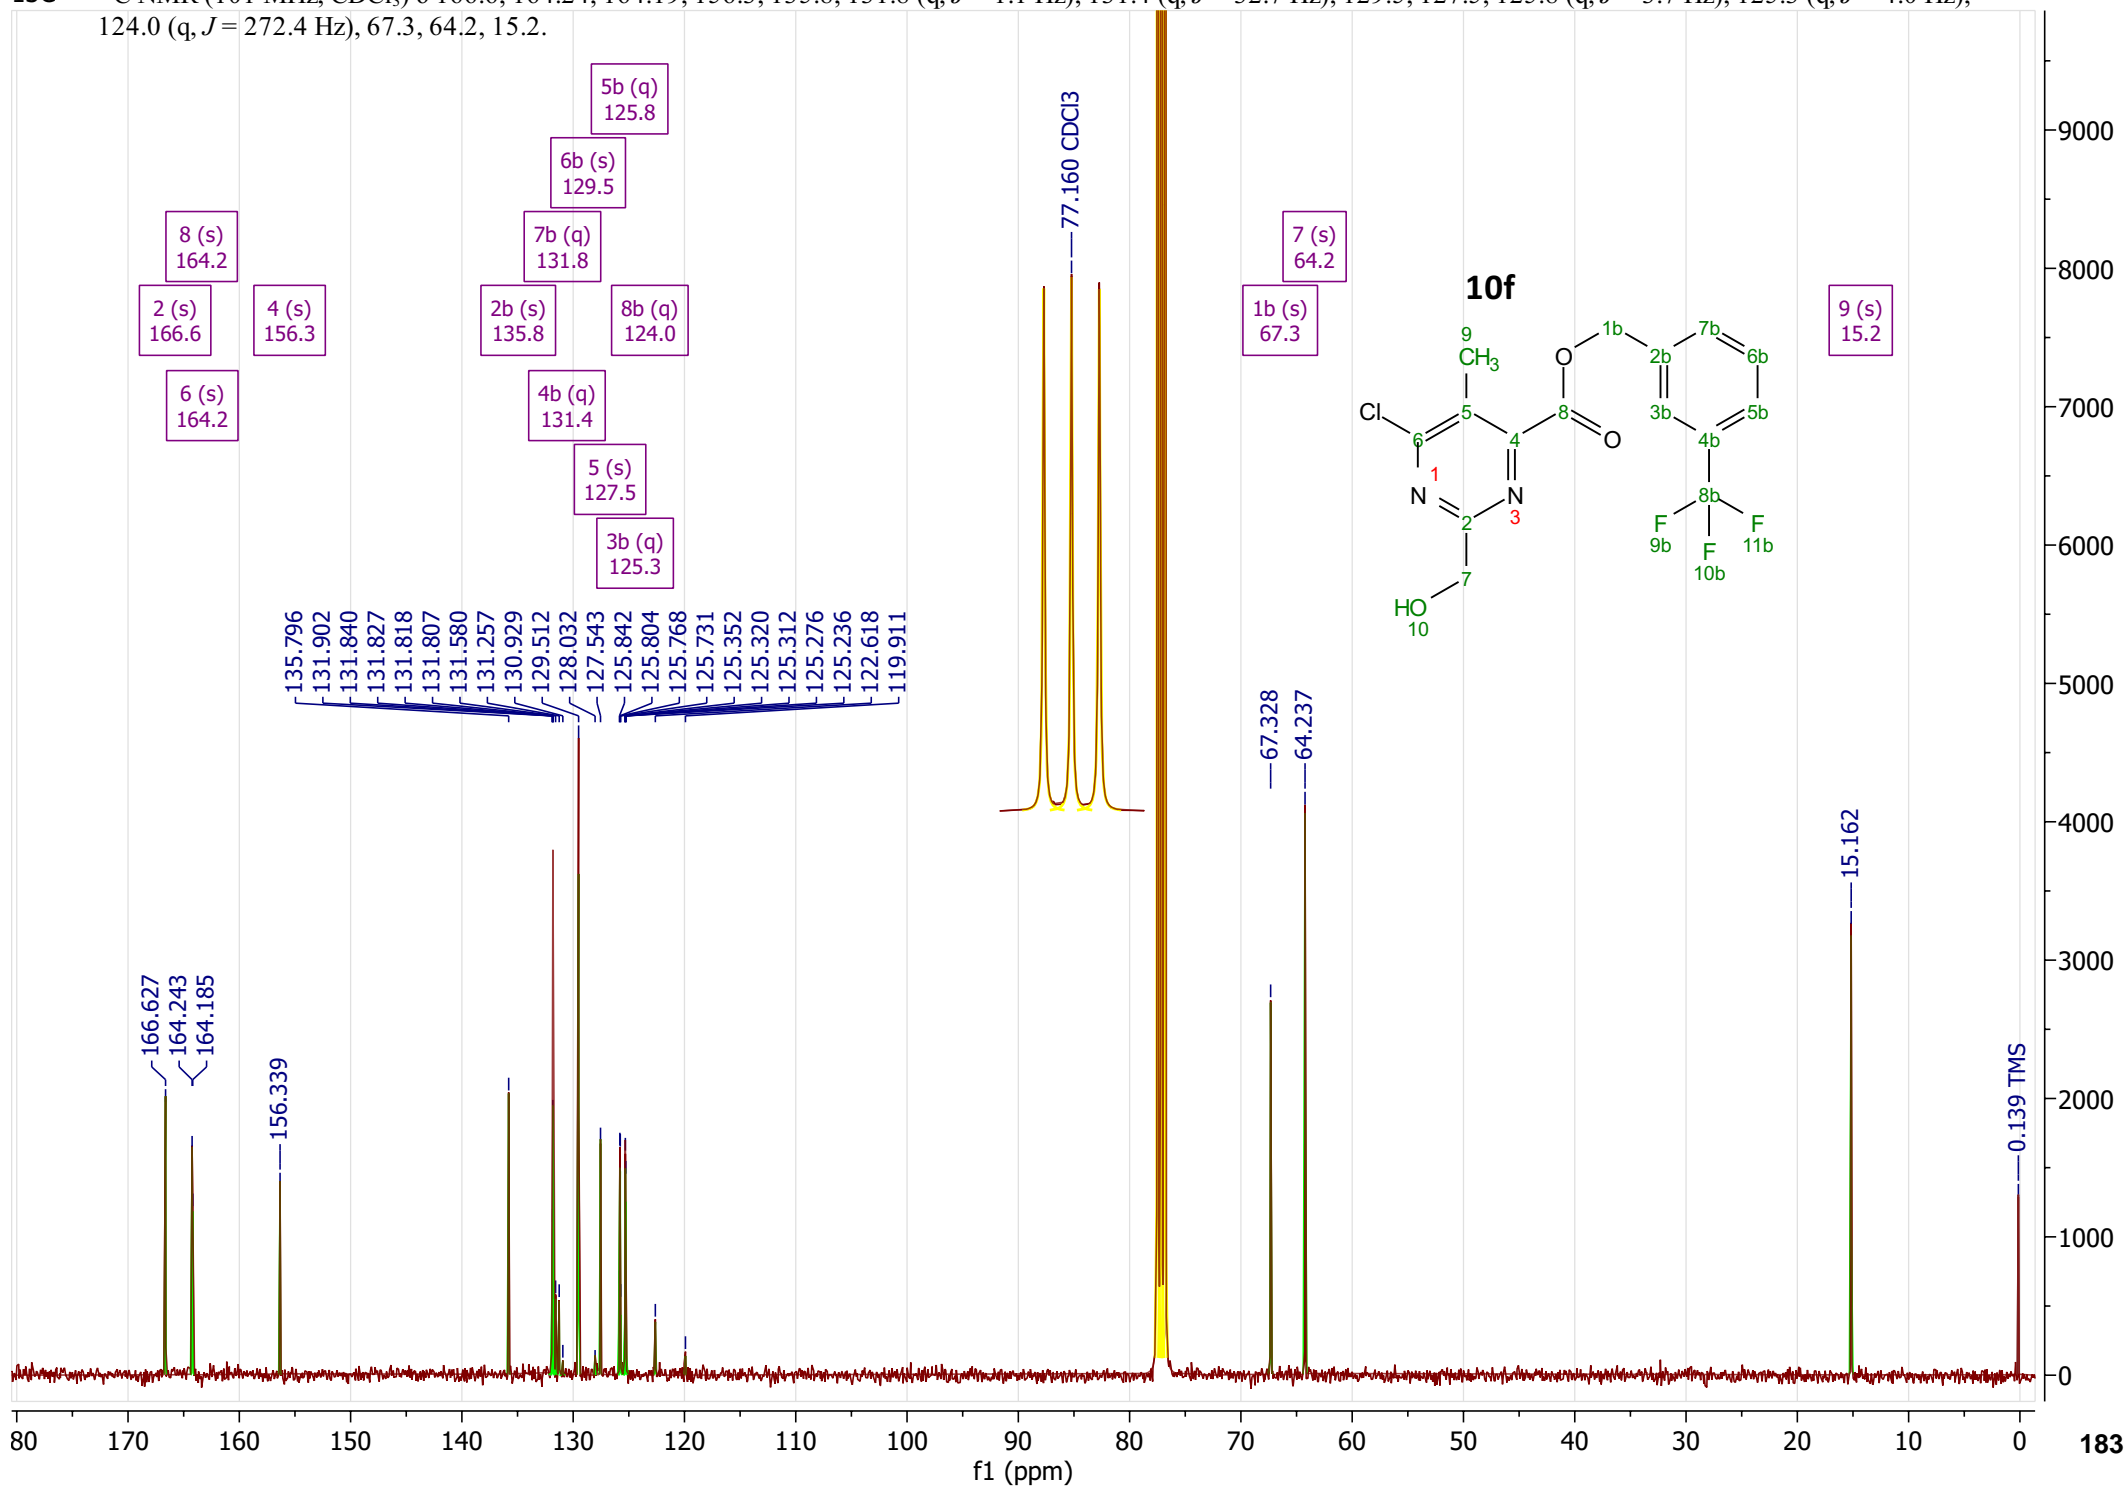

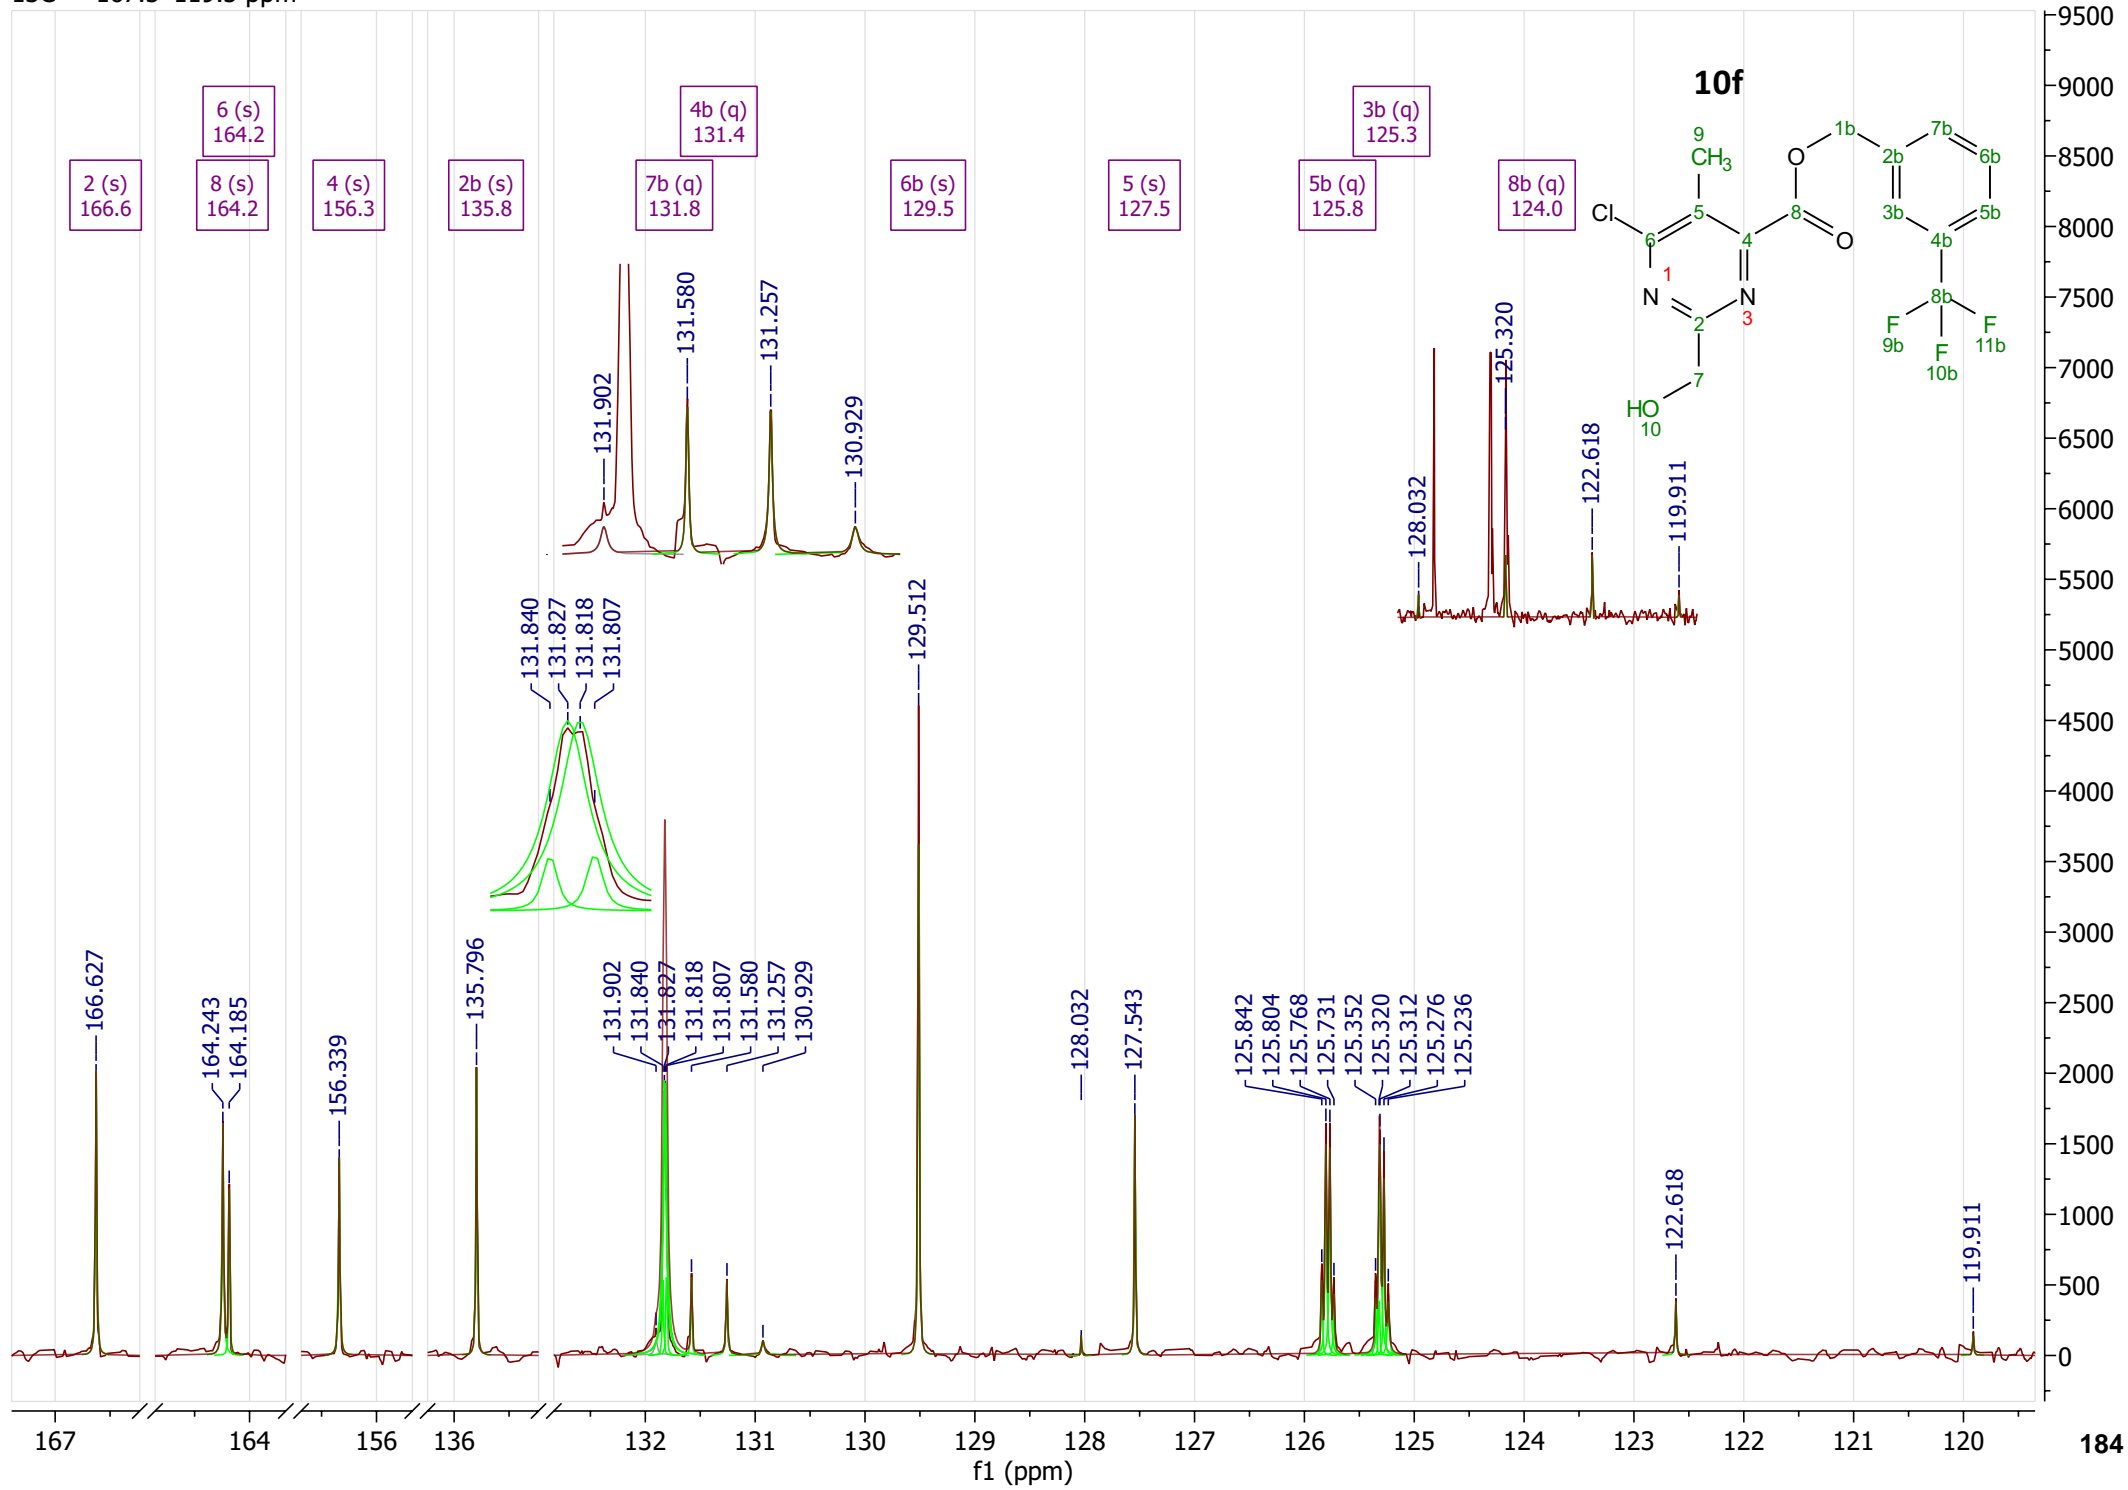



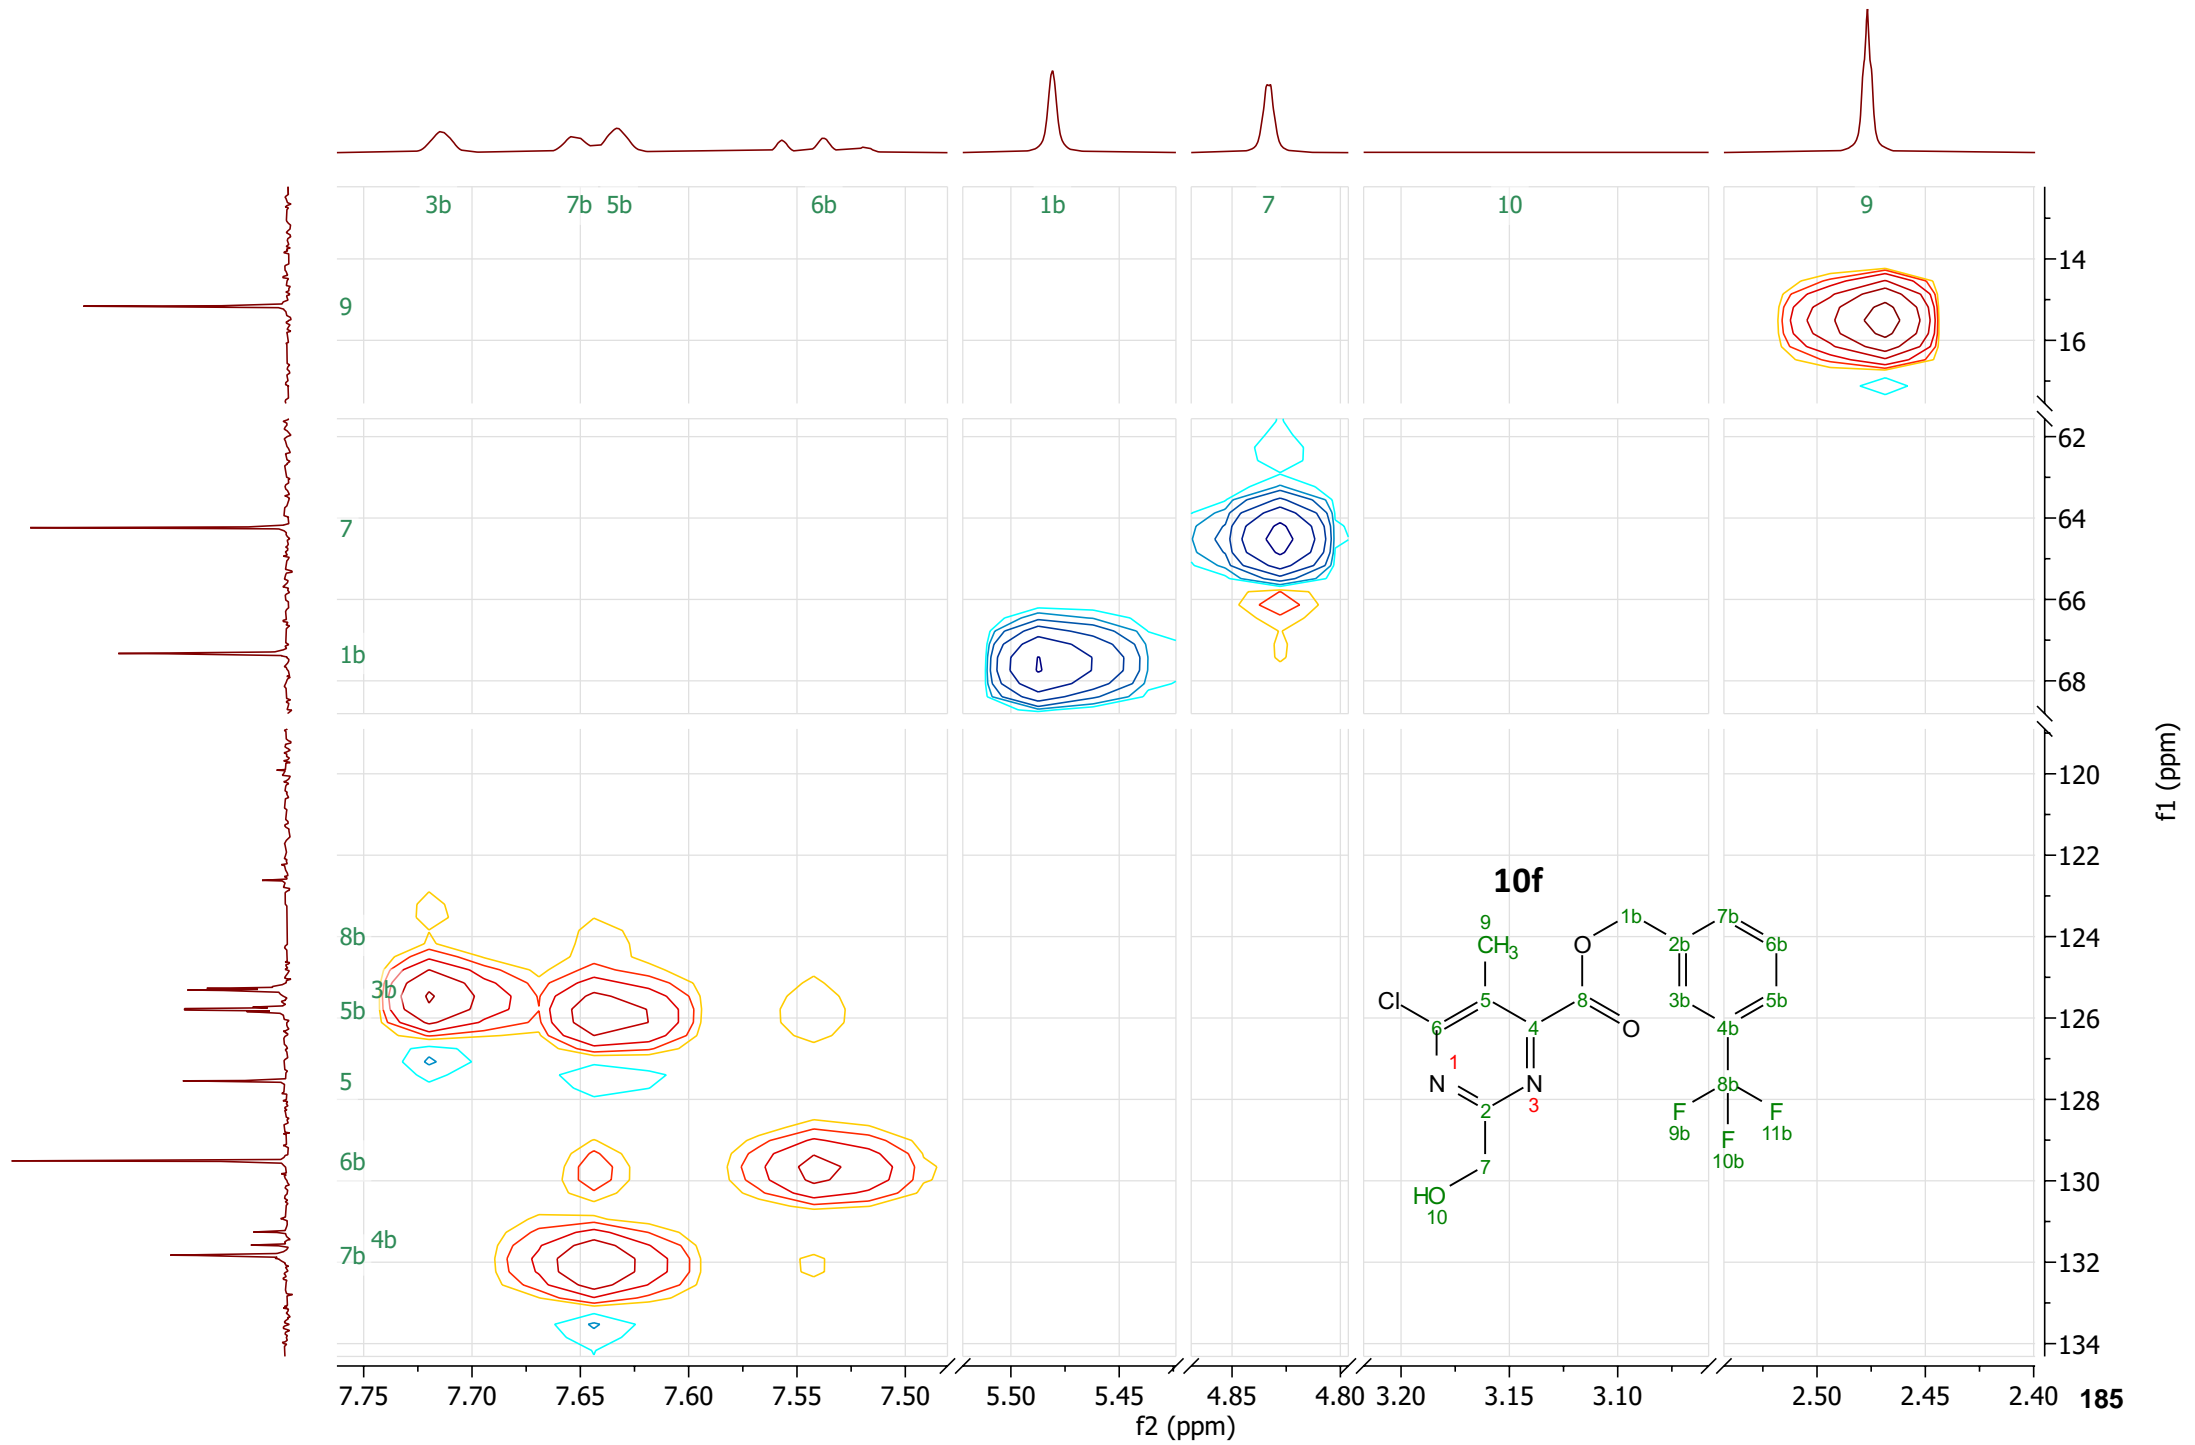

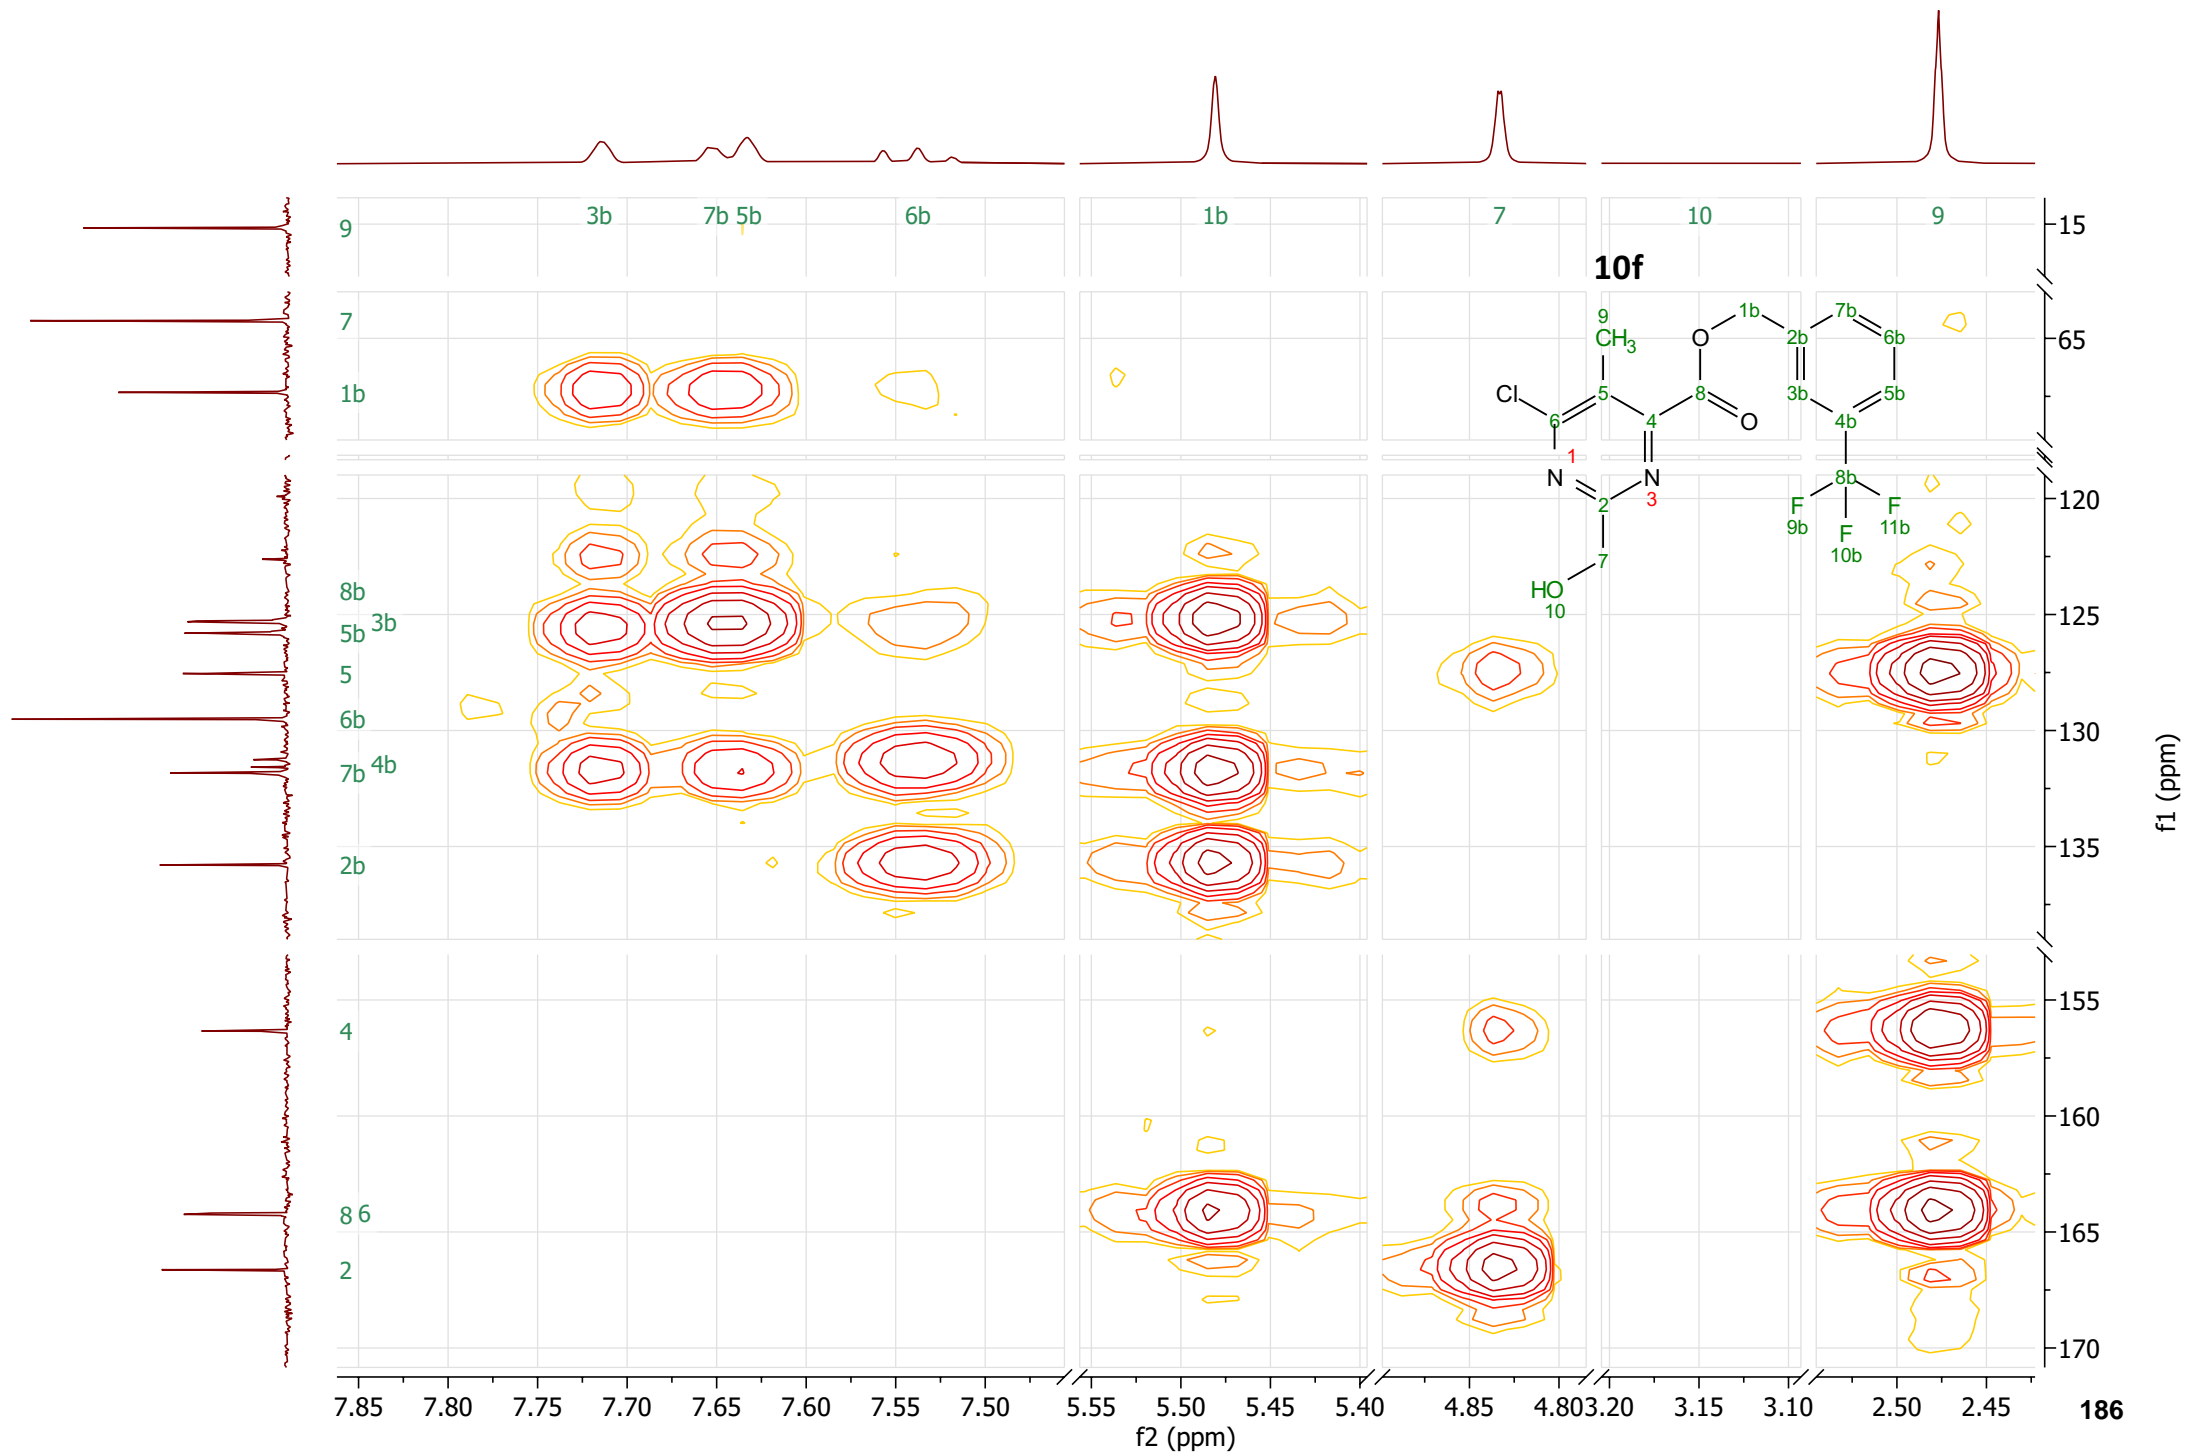

$^{19}\text{F}$  NMR (376 MHz,  $\text{CDCl}_3$ )  $\delta$  -62.76.

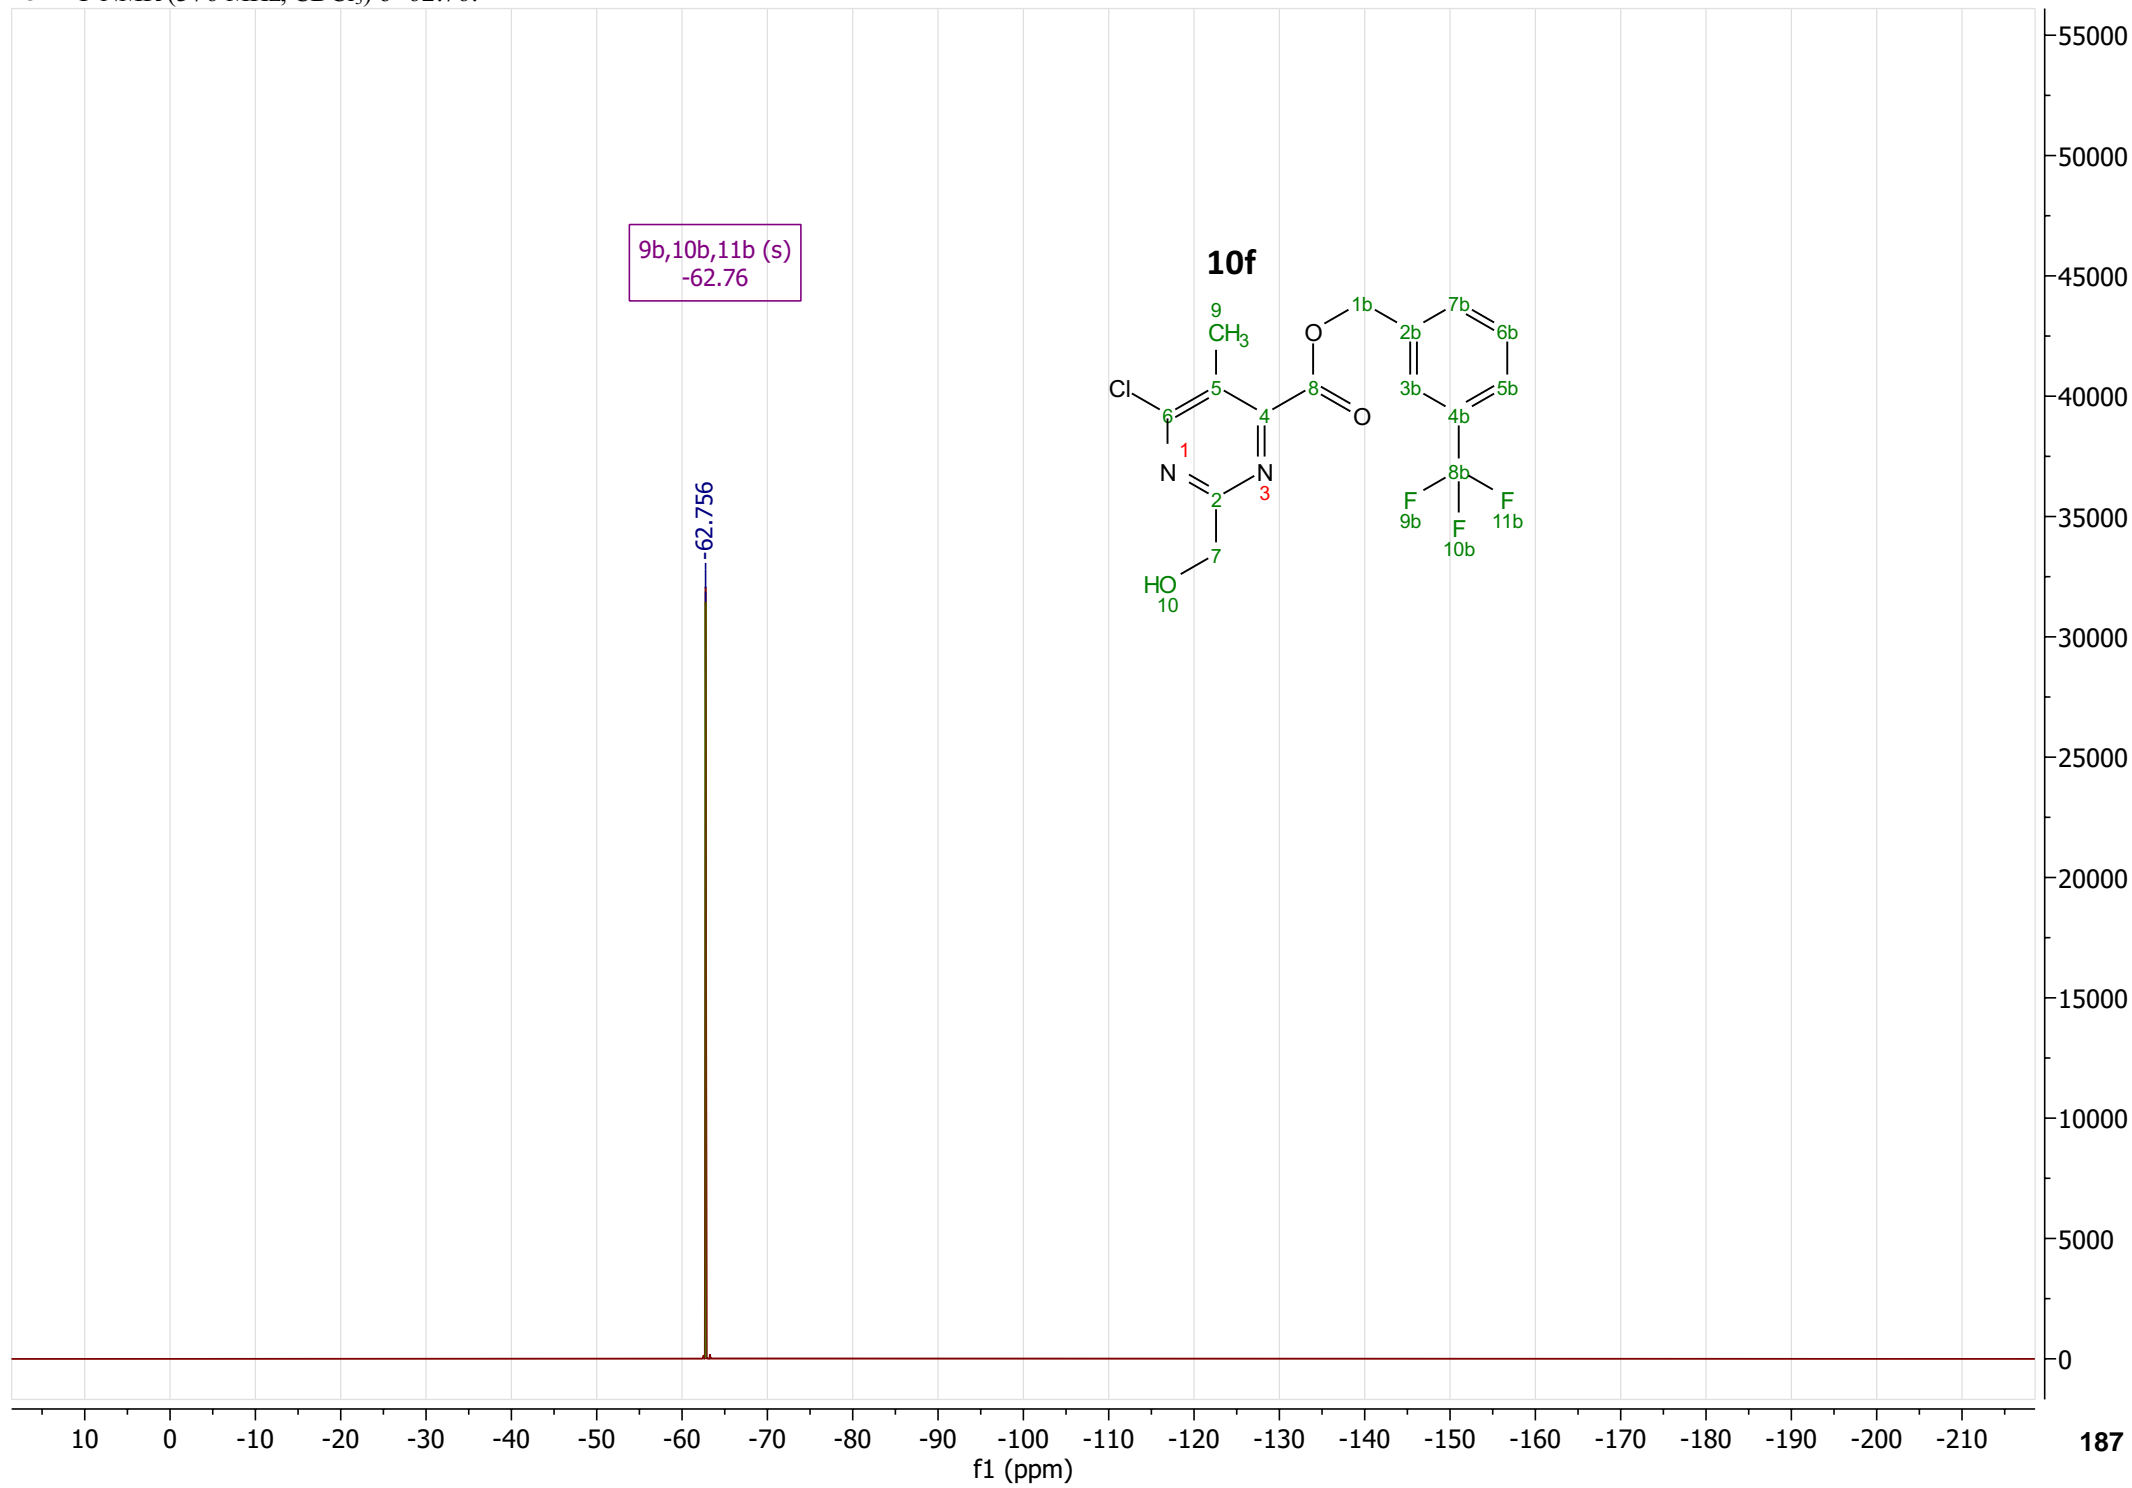

<sup>1</sup>H NMR (400 MHz, CDCl<sub>3</sub>) δ 4.81 (app t, *J* = 0.9 Hz, 2H), 4.41 (t, *J* = 6.8 Hz, 2H), 2.86 (br s, 1H), 2.42 (app q, *J* = 0.8 Hz, 3H), 1.86 – 1.71 (m, 2H), 1.47 – 1.38 (m, 2H), 1.38 – 1.21 (m, 8H), 0.87 (app t, 3H).

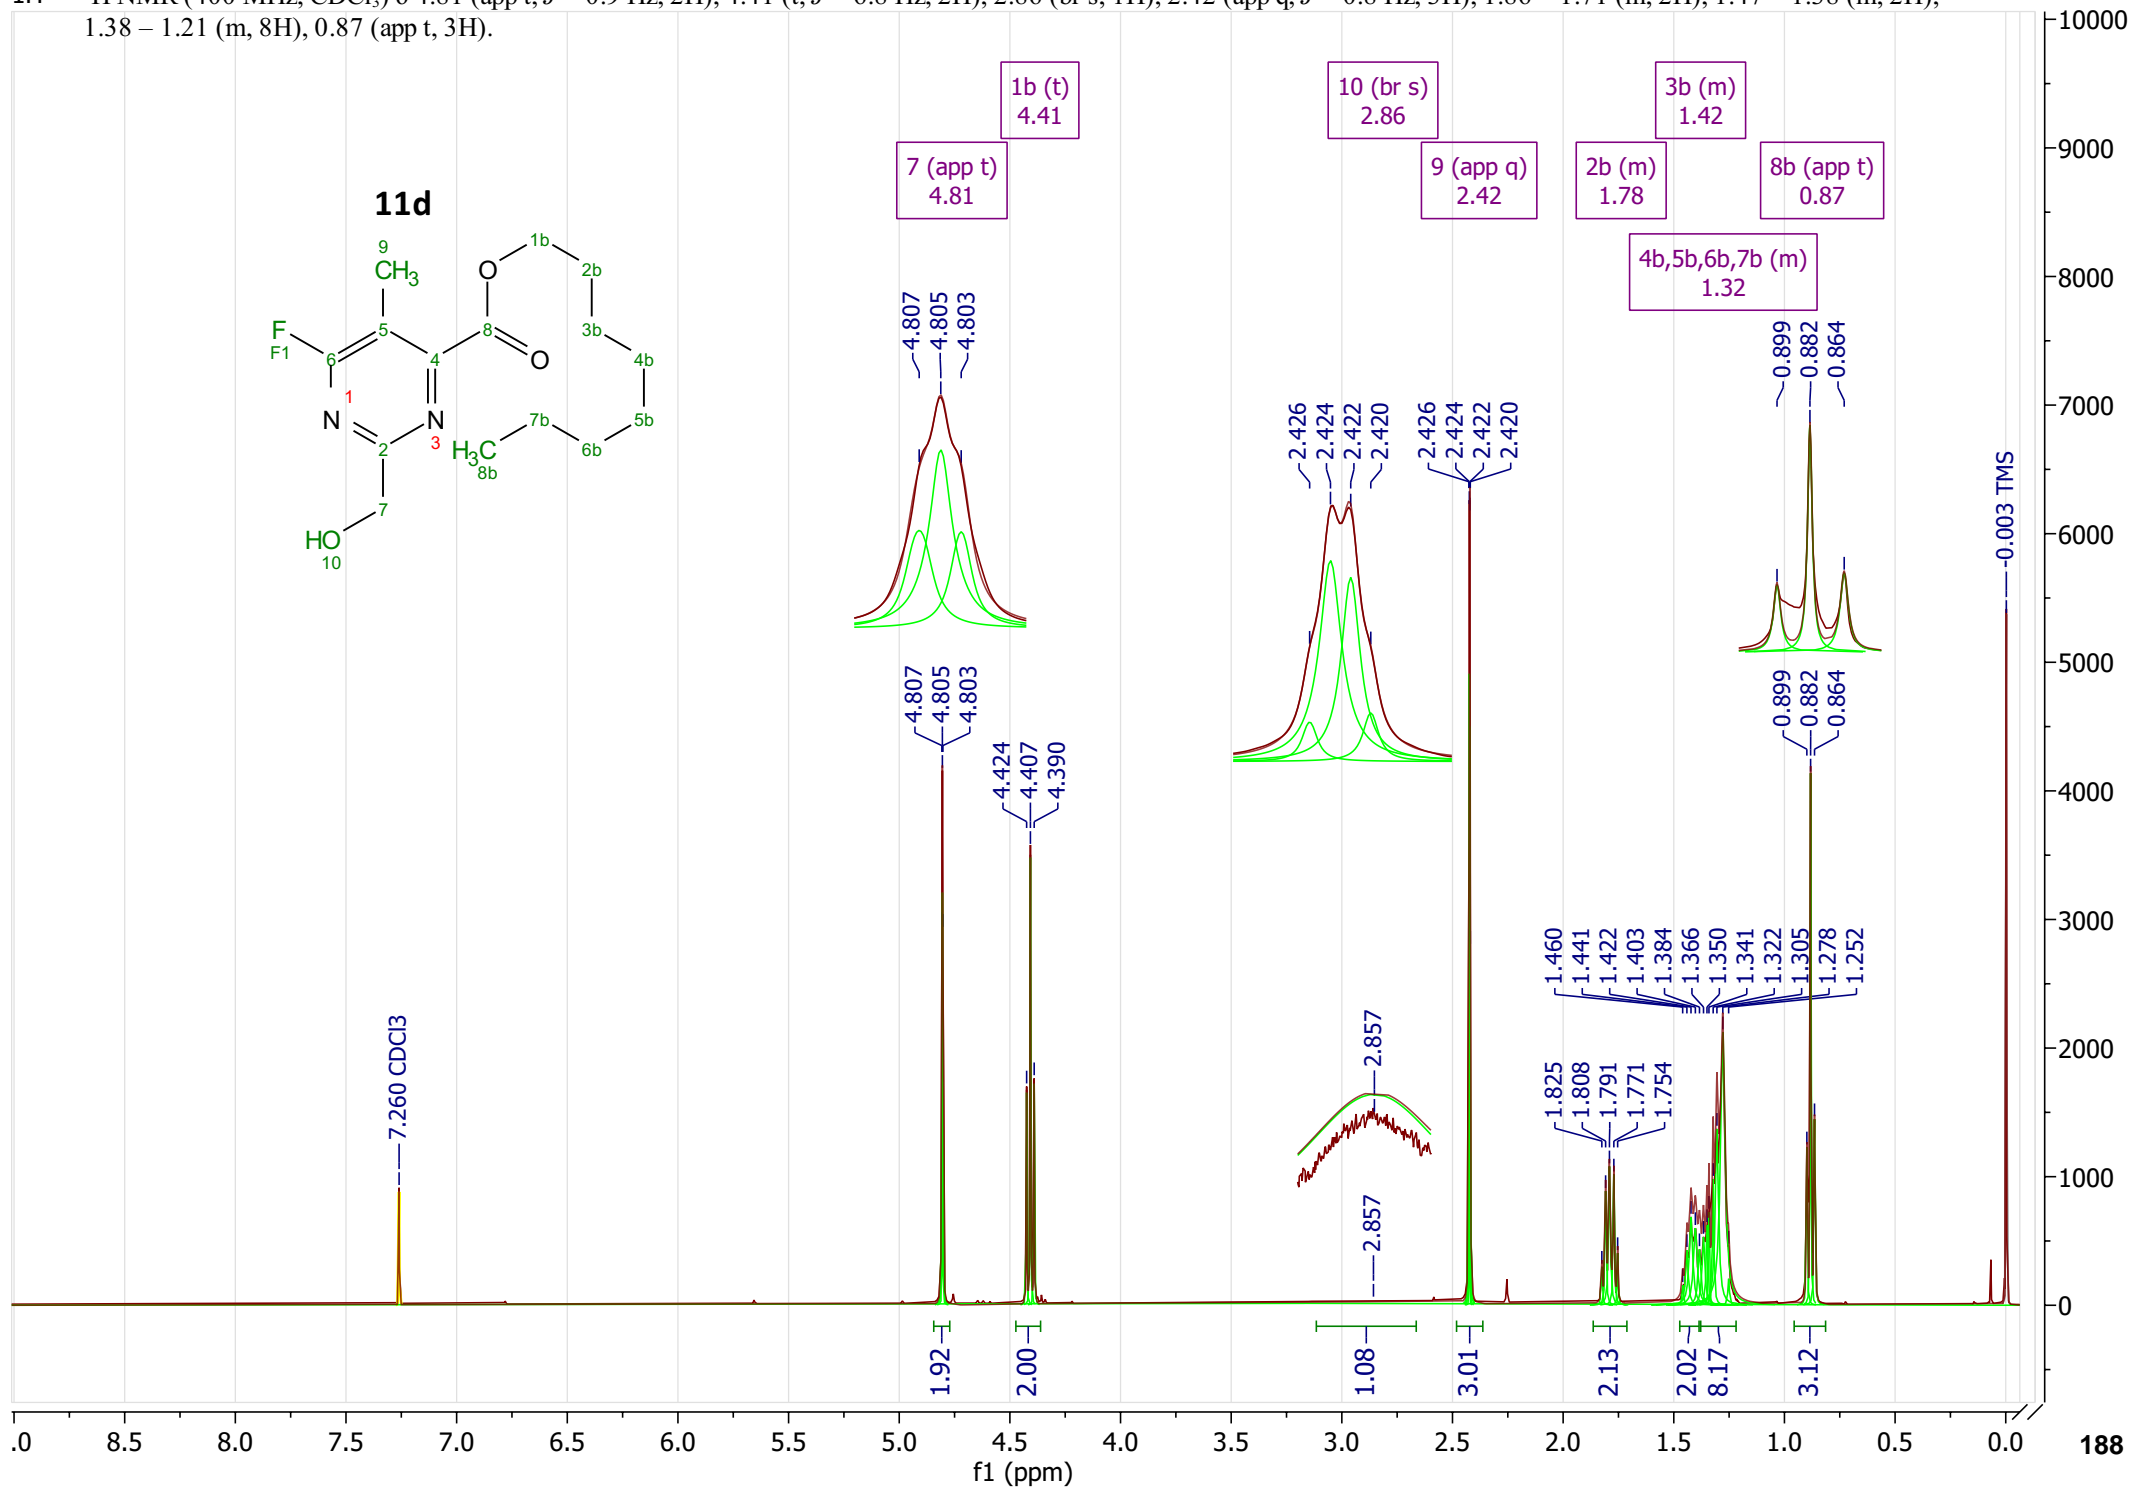

<sup>13</sup>C NMR (101 MHz, CDCl<sub>3</sub>) δ 169.7 (d, *J* = 256.4 Hz), 167.0 (d, *J* = 13.3 Hz), 164.3 (d, *J* = 5.8 Hz), 158.9 (d, *J* = 5.9 Hz), 115.9 (d, *J* = 27.3 Hz), 67.0, 64.2, 31.9, 29.3 (2C), 28.6, 26.0, 22.8, 14.2, 10.4.

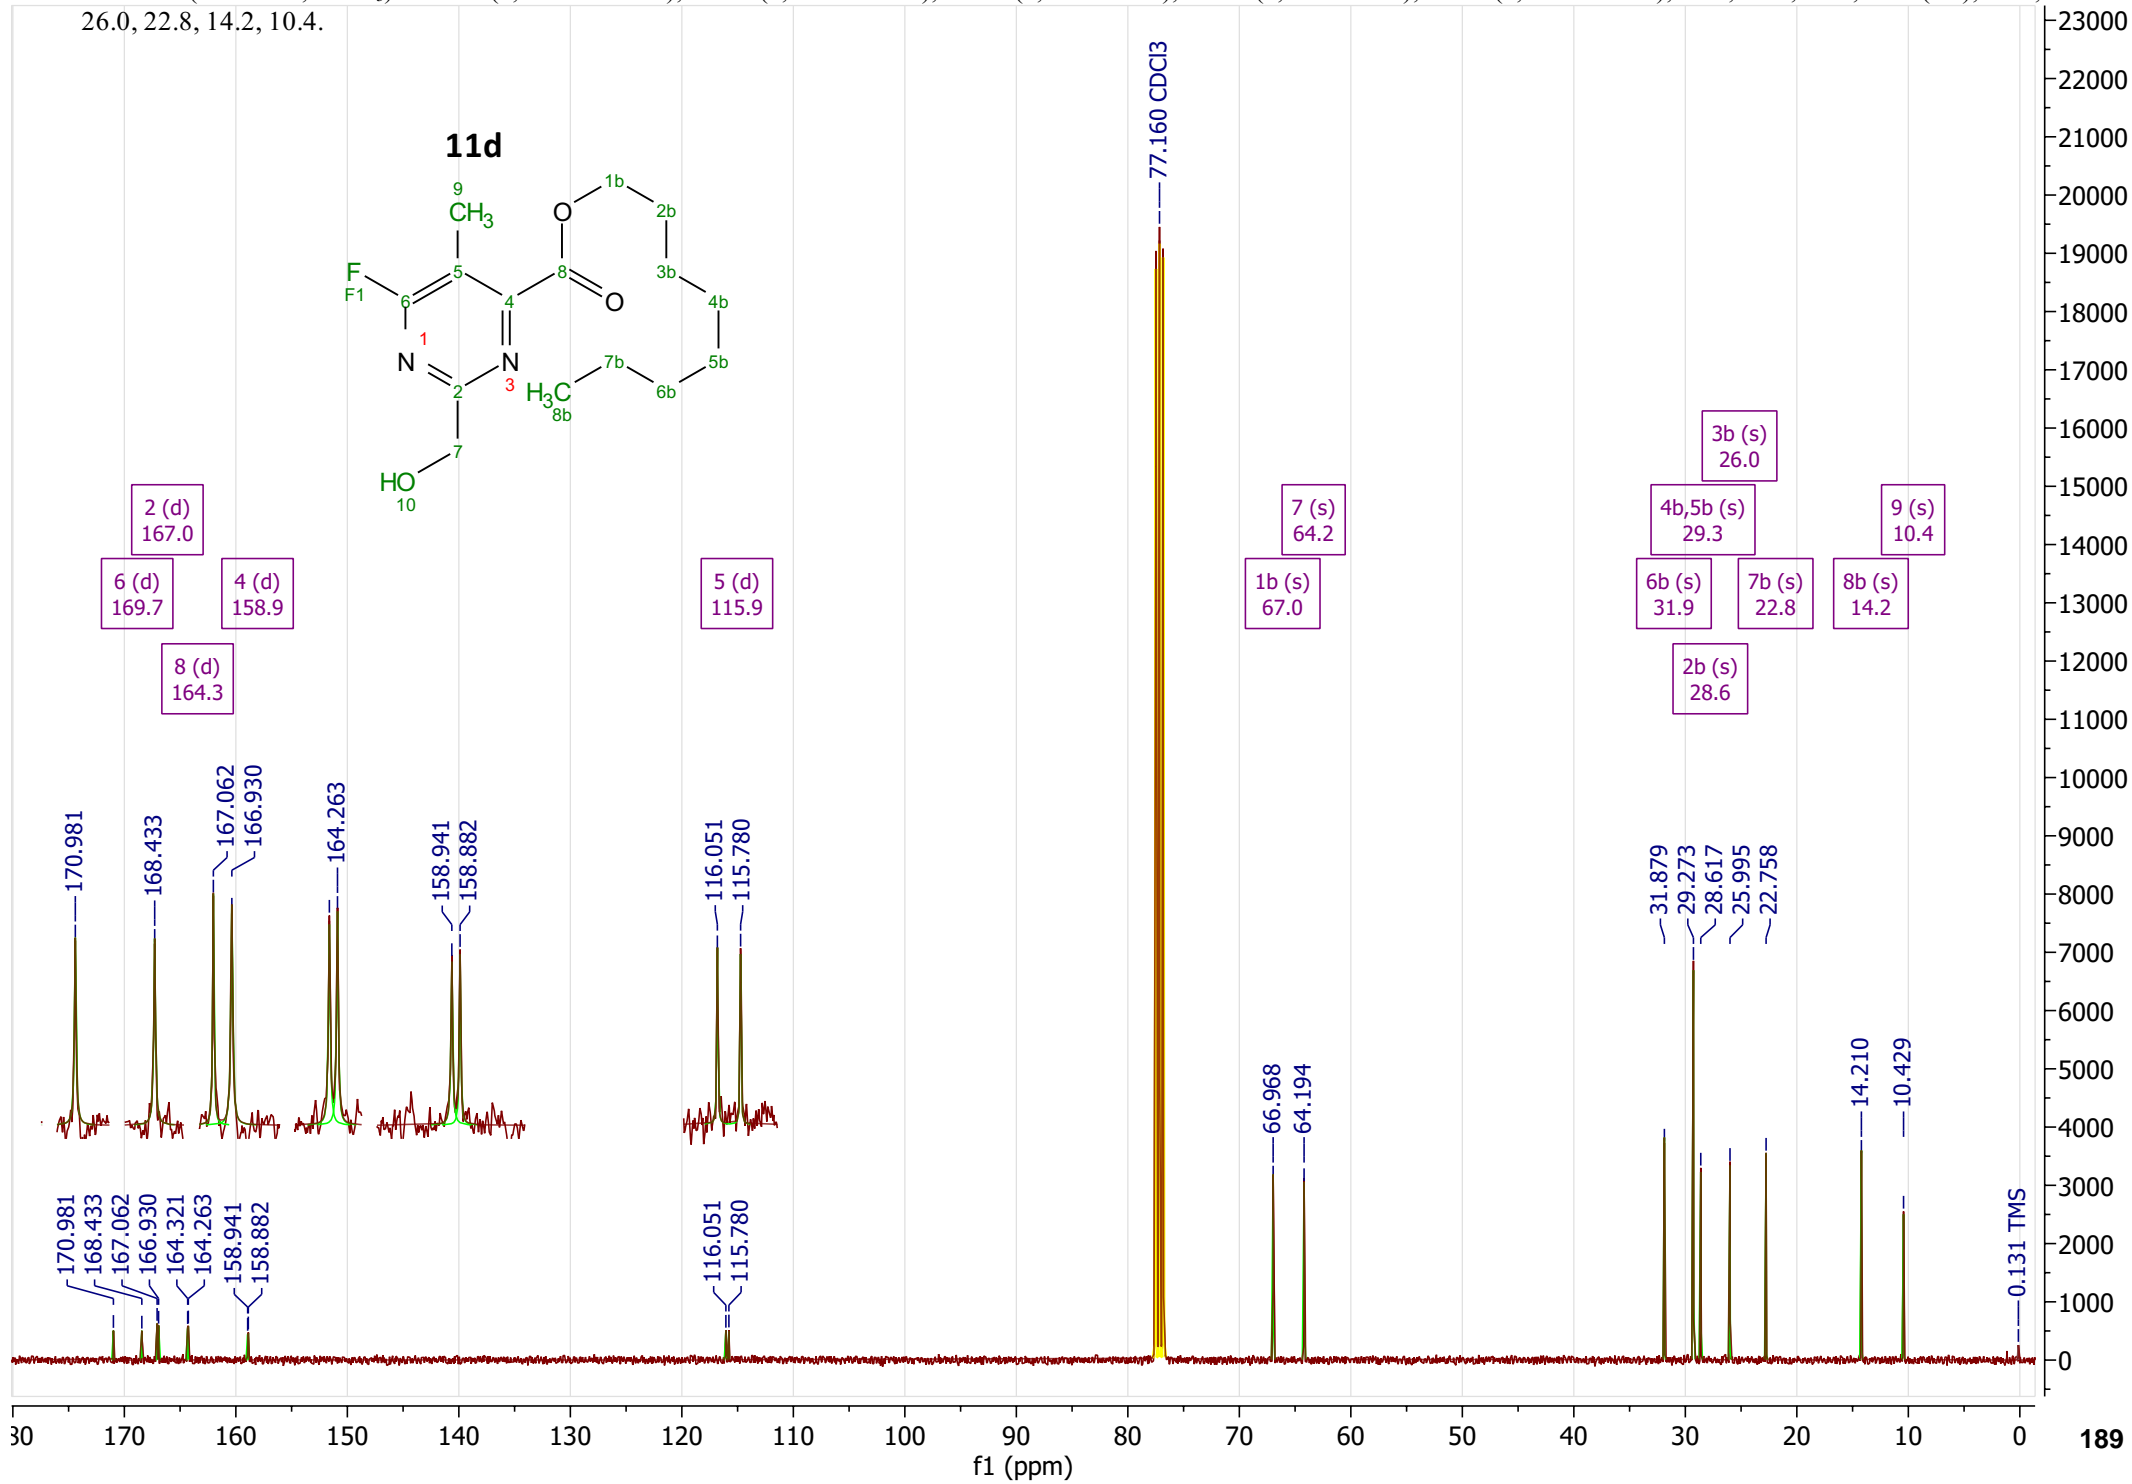

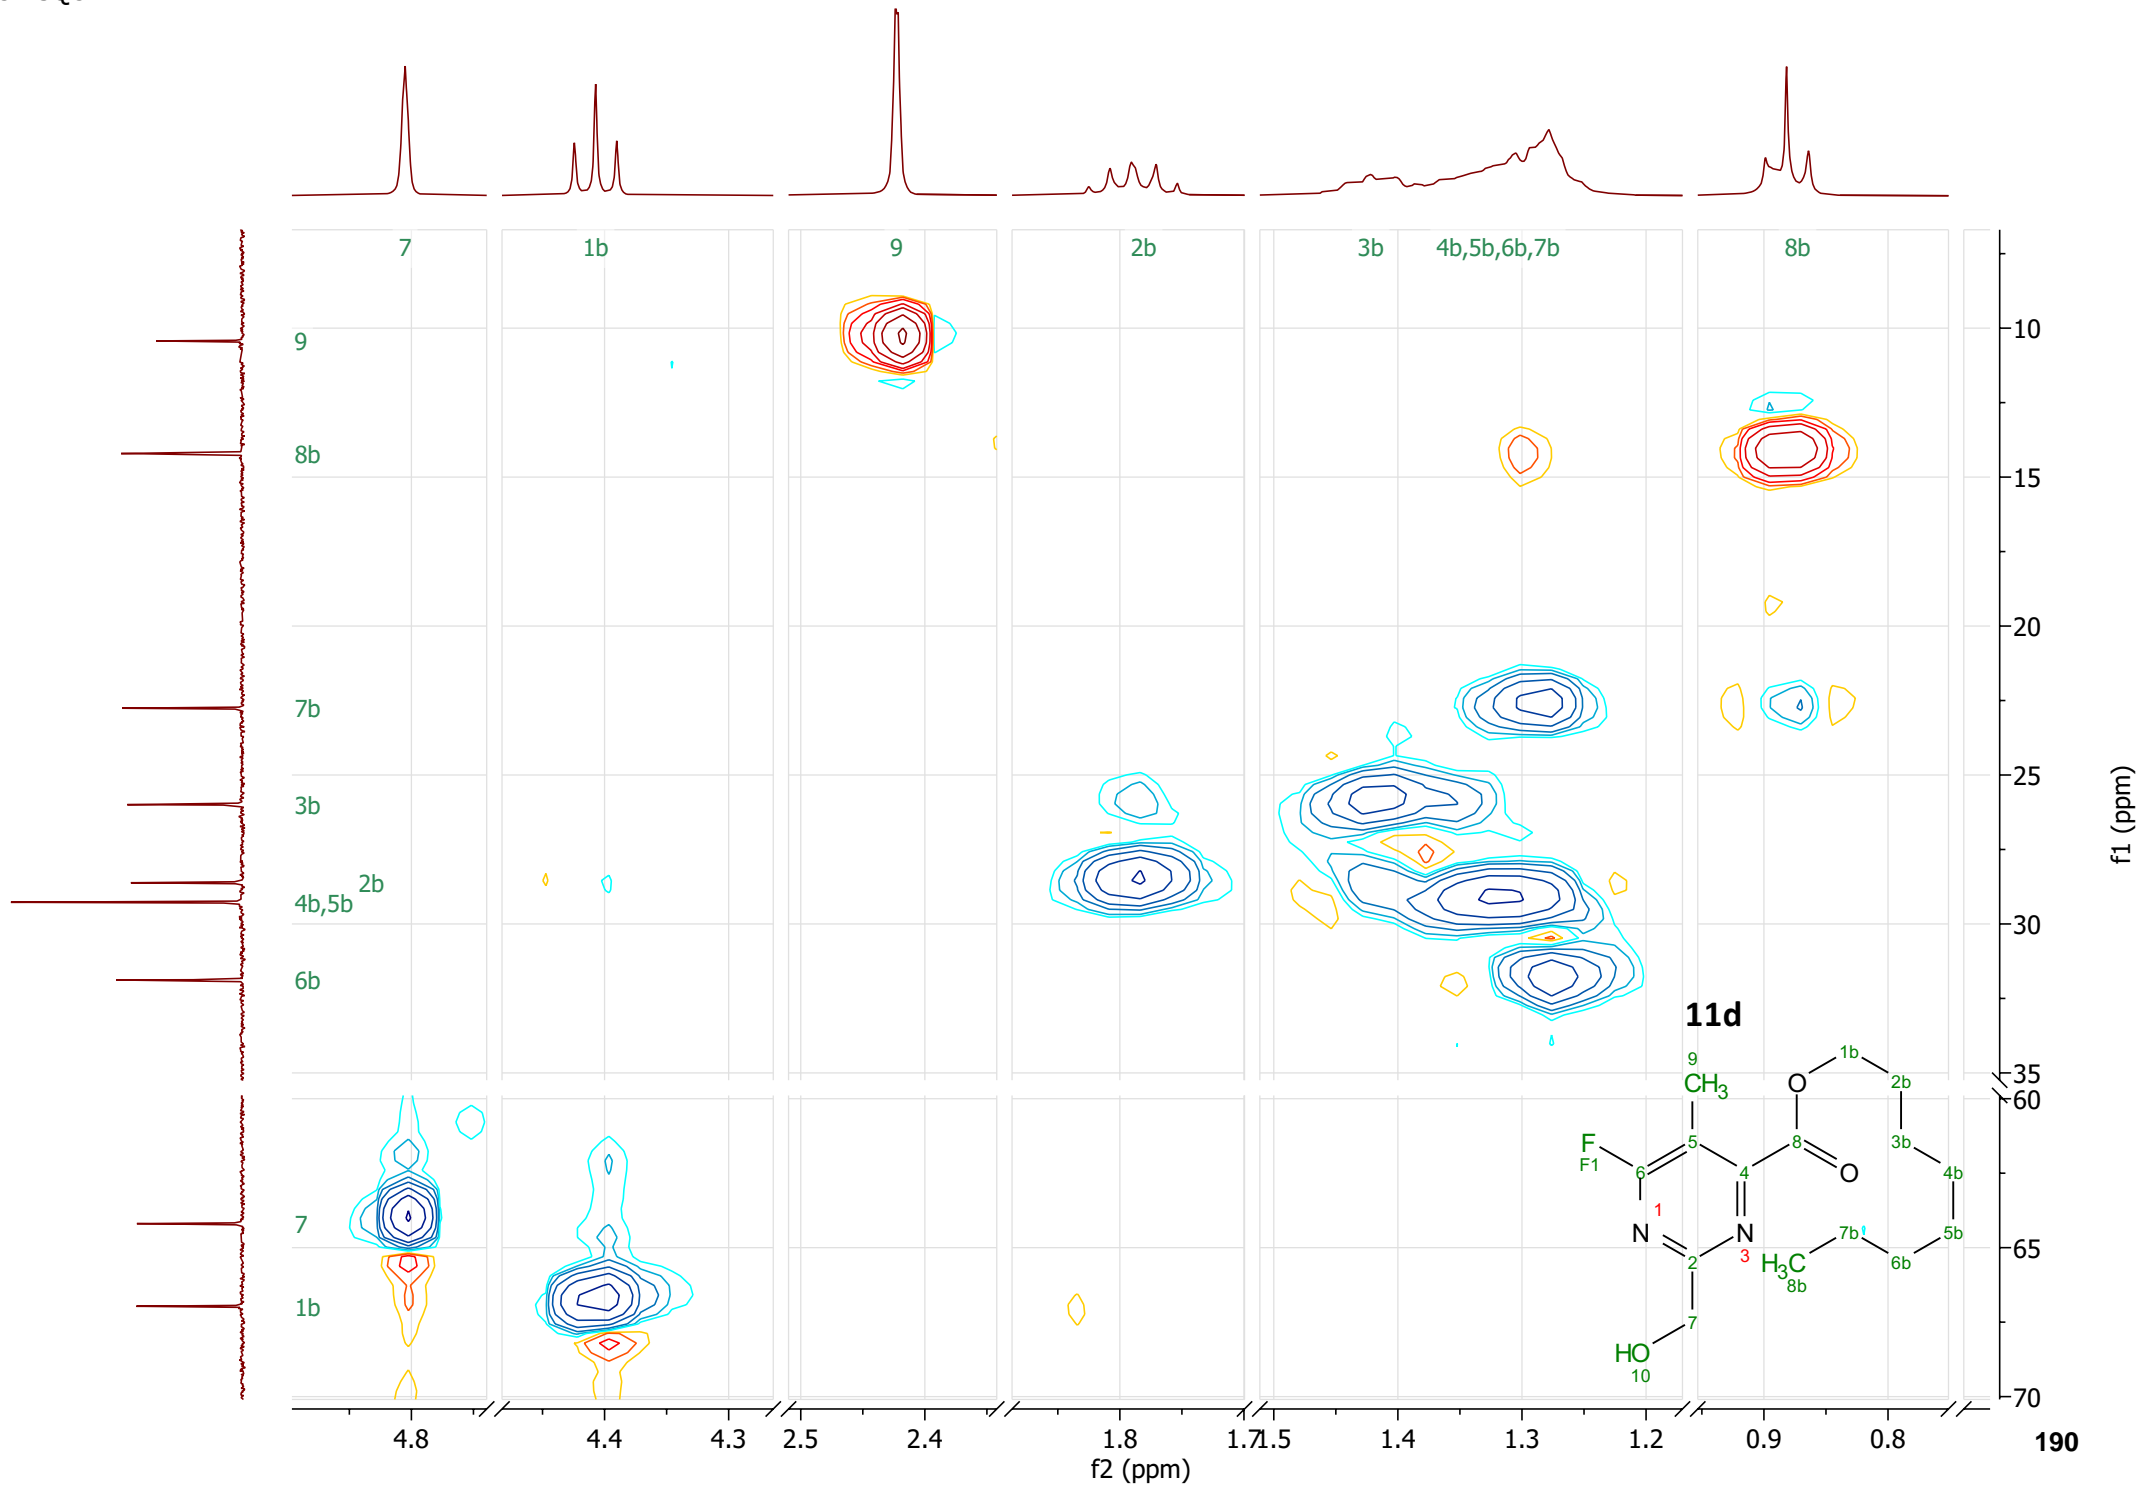

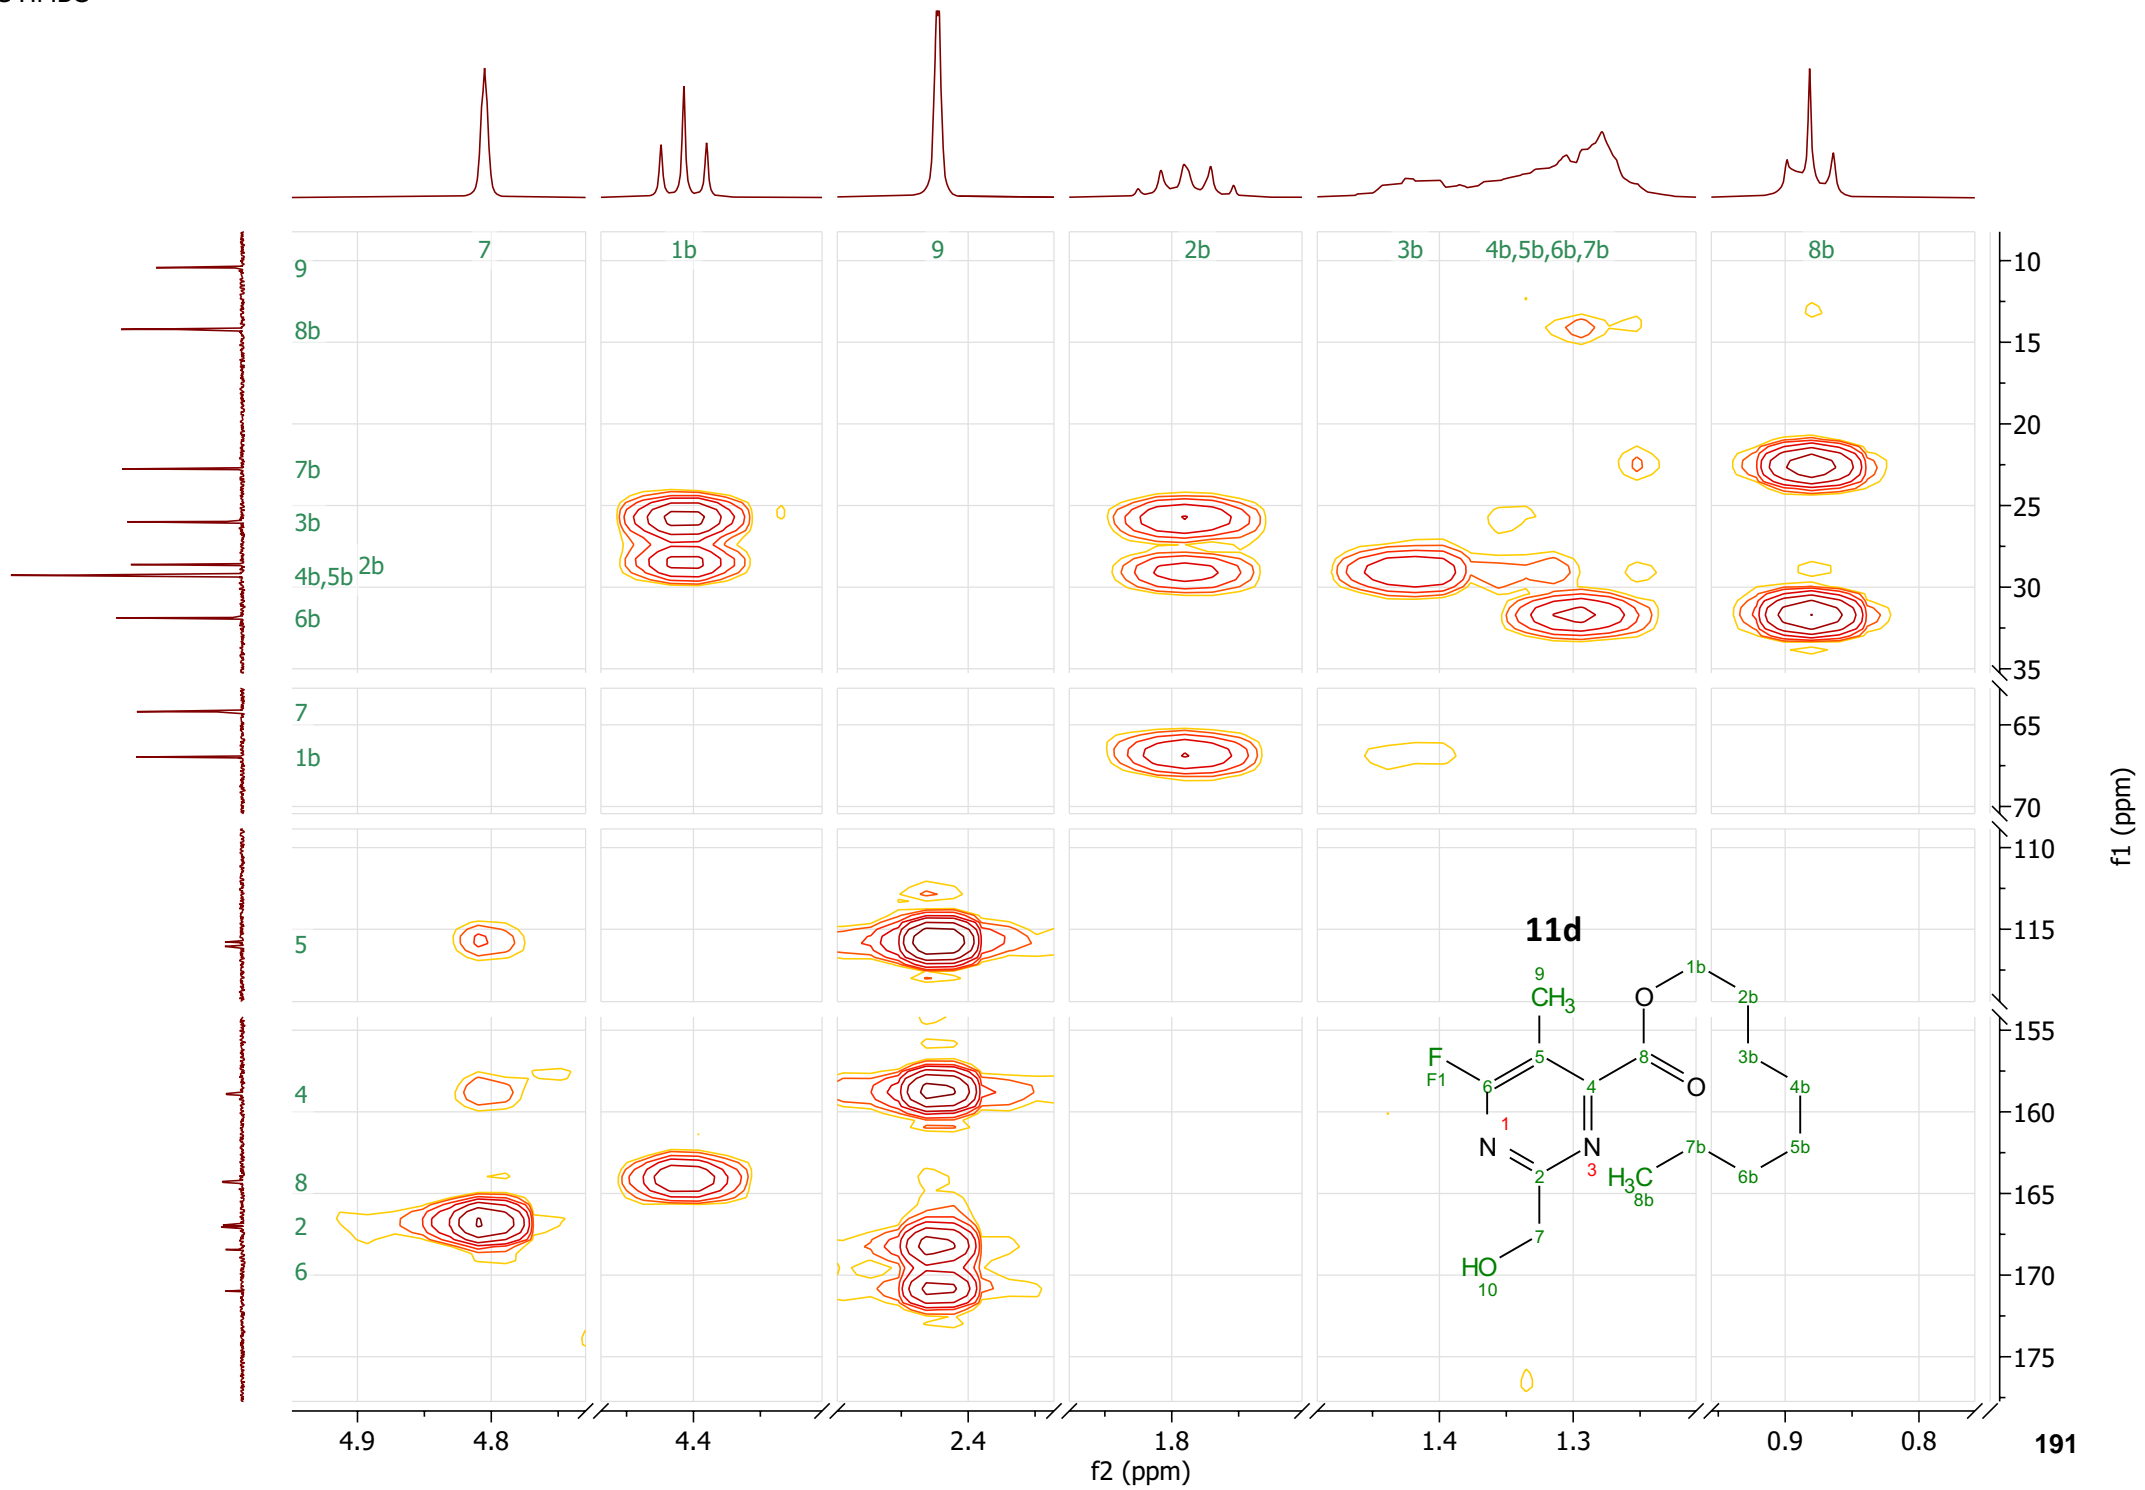

$^{19}\text{F}$  NMR (376 MHz,  $\text{CDCl}_3$ )  $\delta$  -61.28.

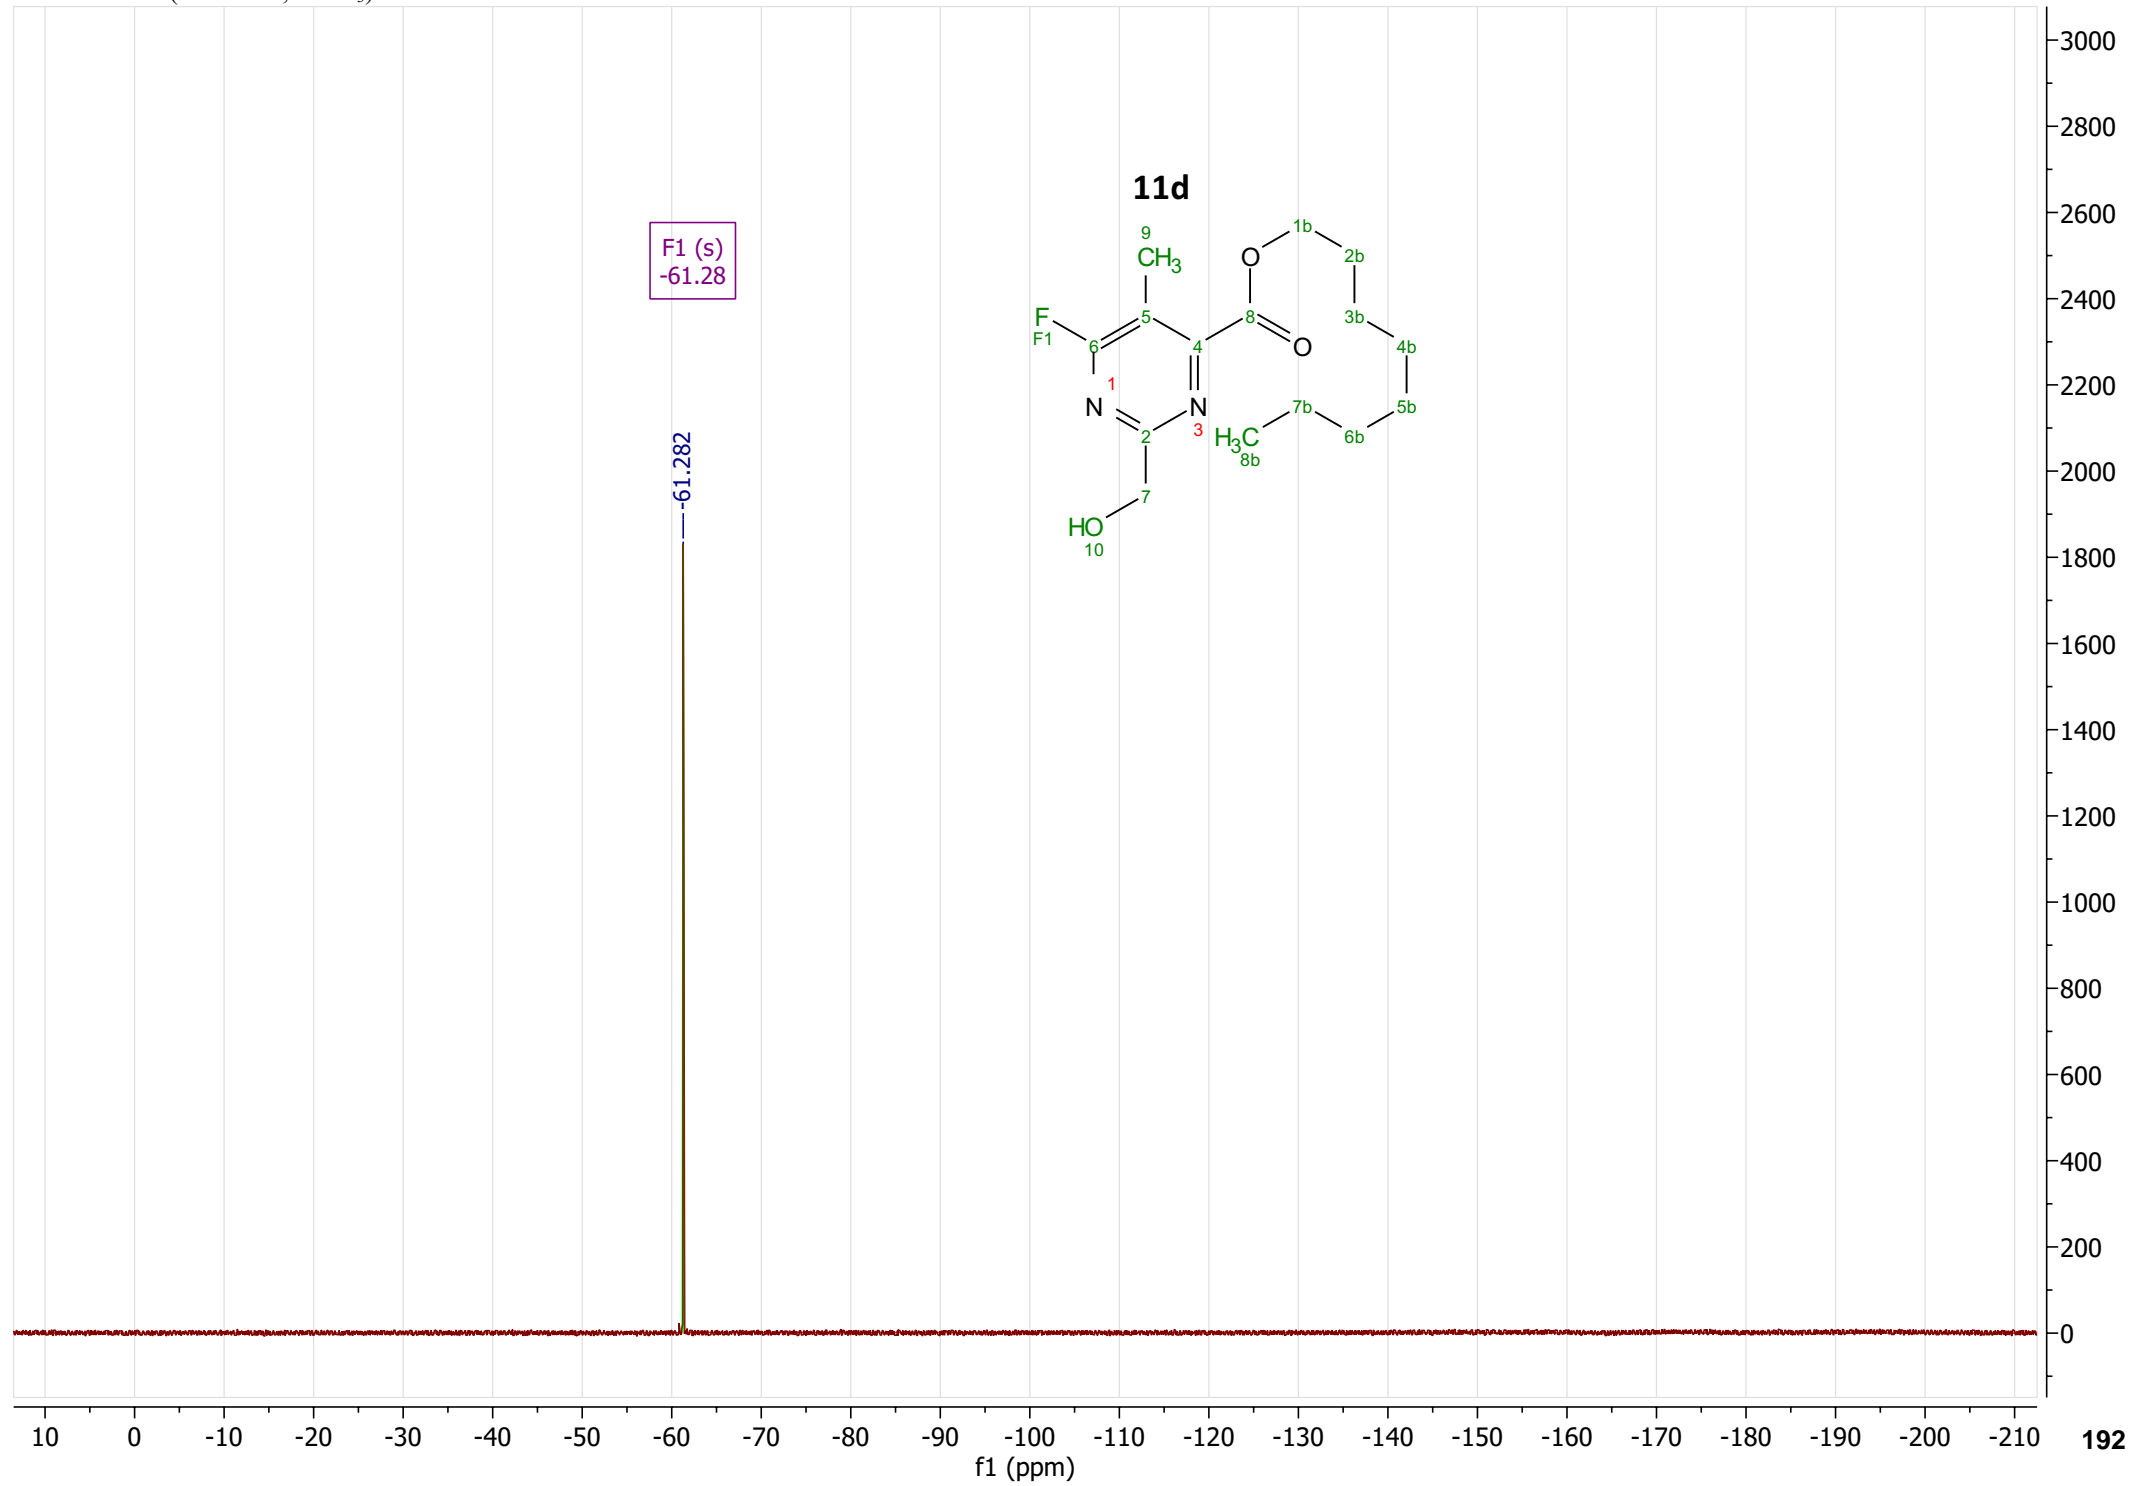



$^1\text{H}$  NMR (400 MHz,  $\text{CDCl}_3$ )  $\delta$  4.69 (app d,  $J = 0.8$  Hz, 2H), 4.41 (t,  $J = 6.5$  Hz, 2H), 4.38 (t,  $J = 6.8$  Hz, 2H), 3.50 (br s, 1H), 2.27 (app t,  $J = 0.8$  Hz, 3H), 1.86 – 1.68 (m, 4H), 1.55 – 1.37 (m, 4H), 0.98 (t,  $J = 7.4$  Hz, 3H), 0.97 (t,  $J = 7.4$  Hz, 3H).

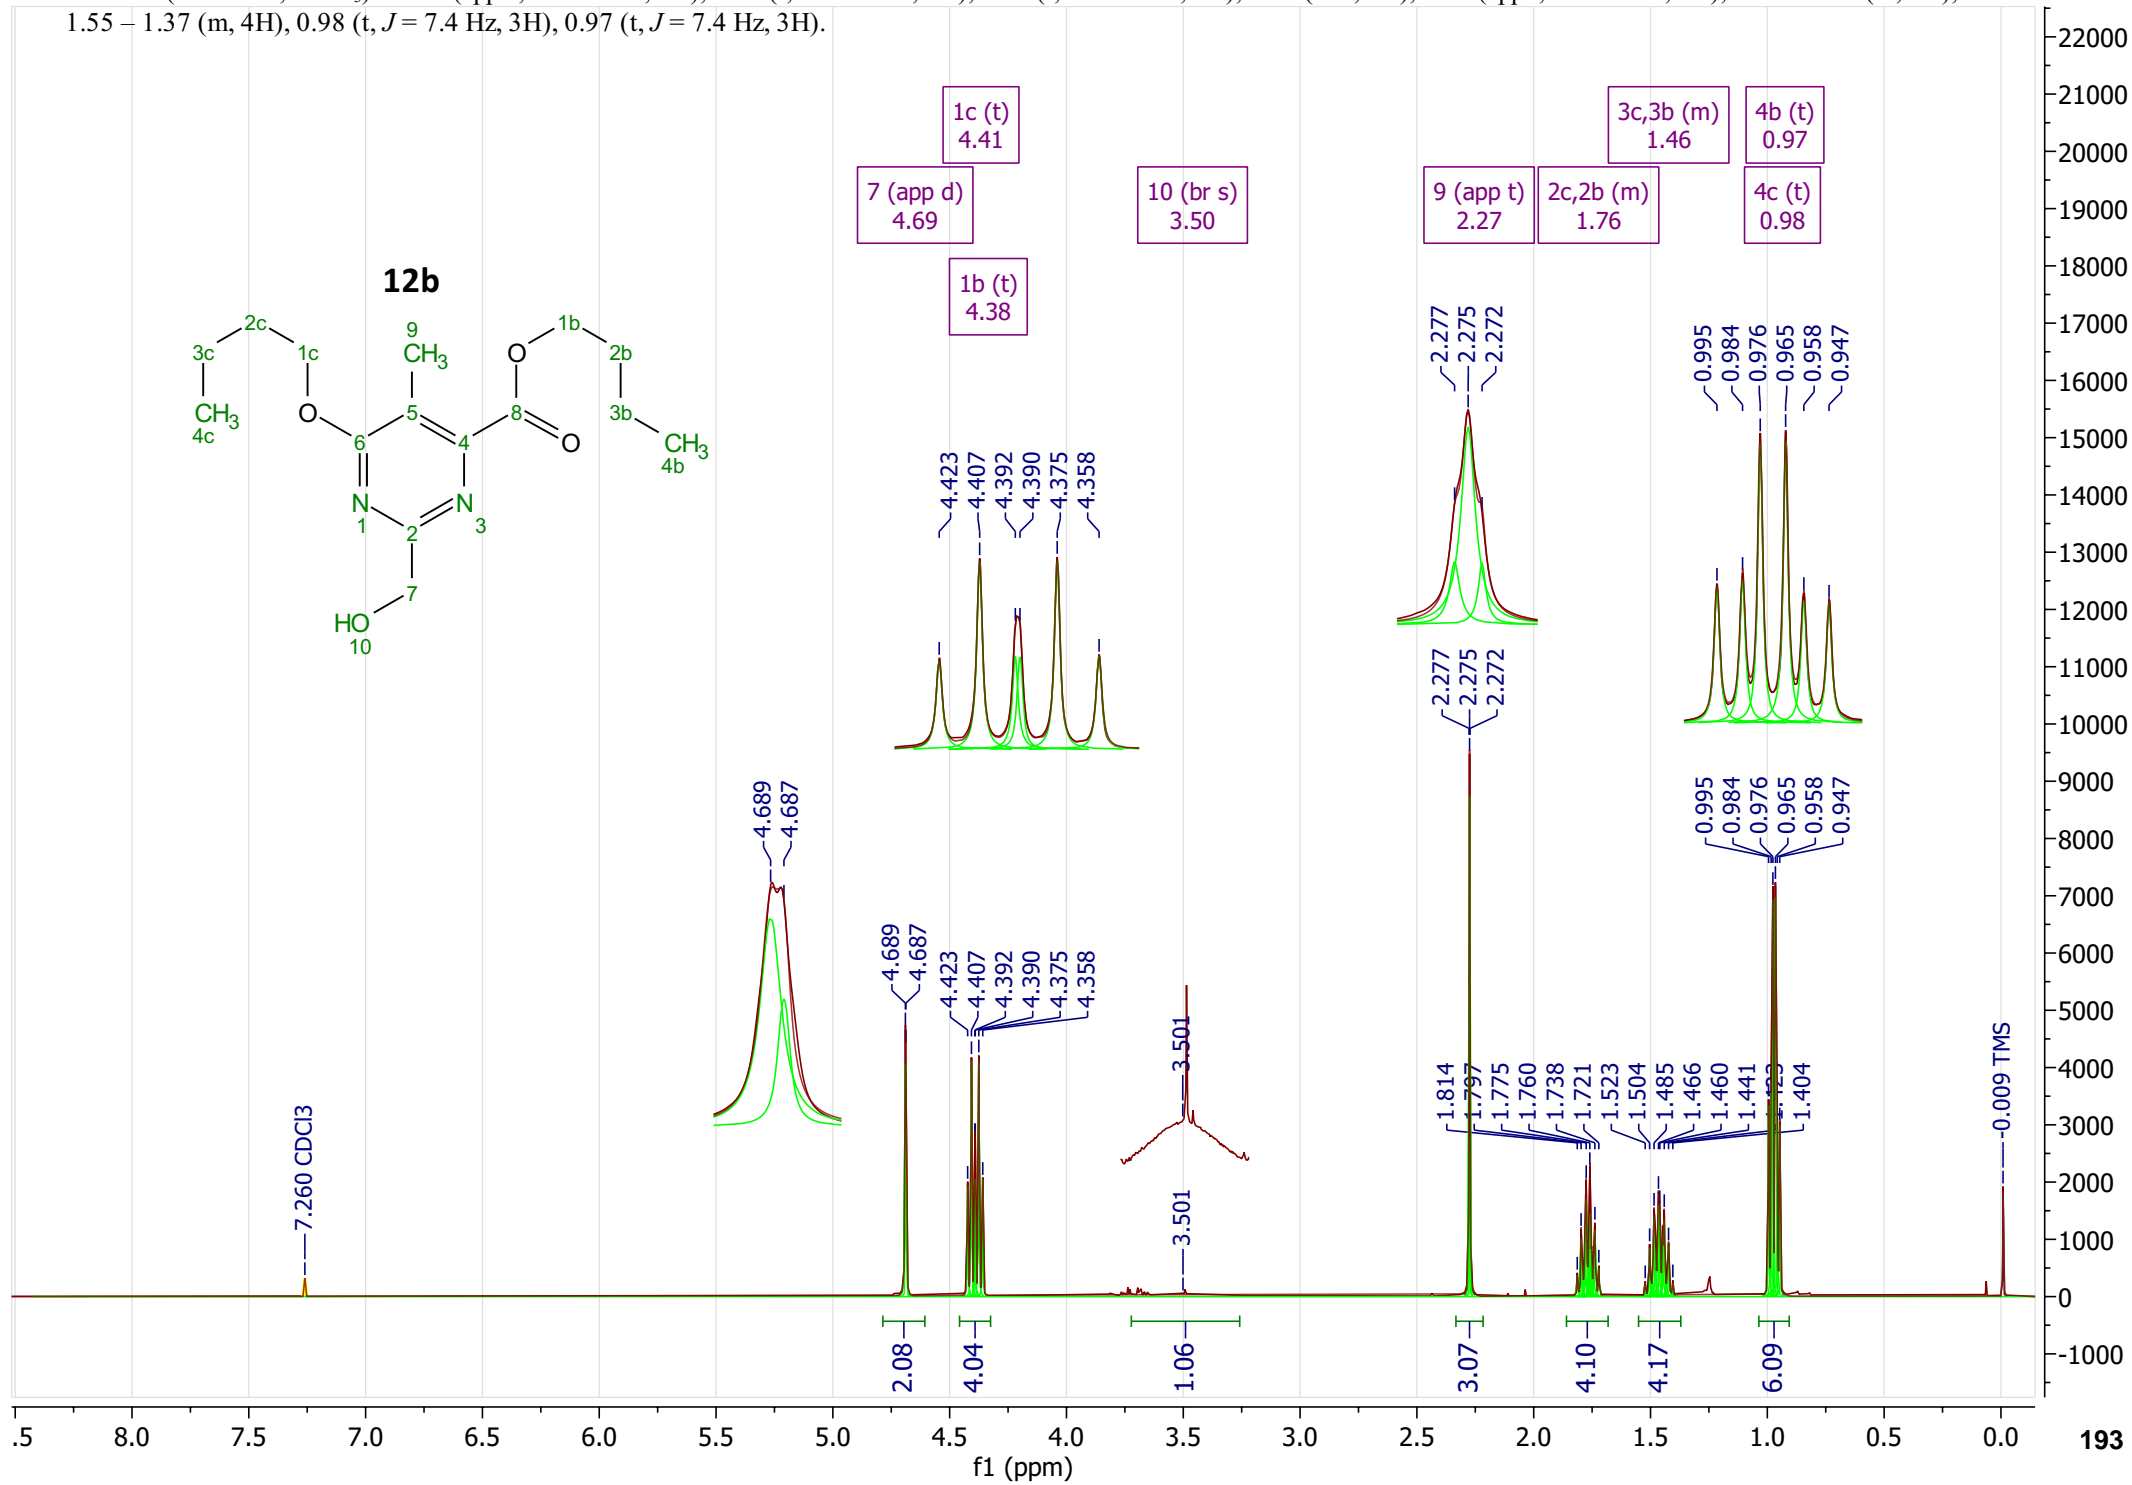

$^{13}\text{C}$  NMR (101 MHz,  $\text{CDCl}_3$ )  $\delta$  169.2, 165.8, 165.3, 154.5, 116.3, 67.4, 66.1, 64.2, 30.8, 30.7, 19.33, 19.29, 13.9, 13.8, 11.0.

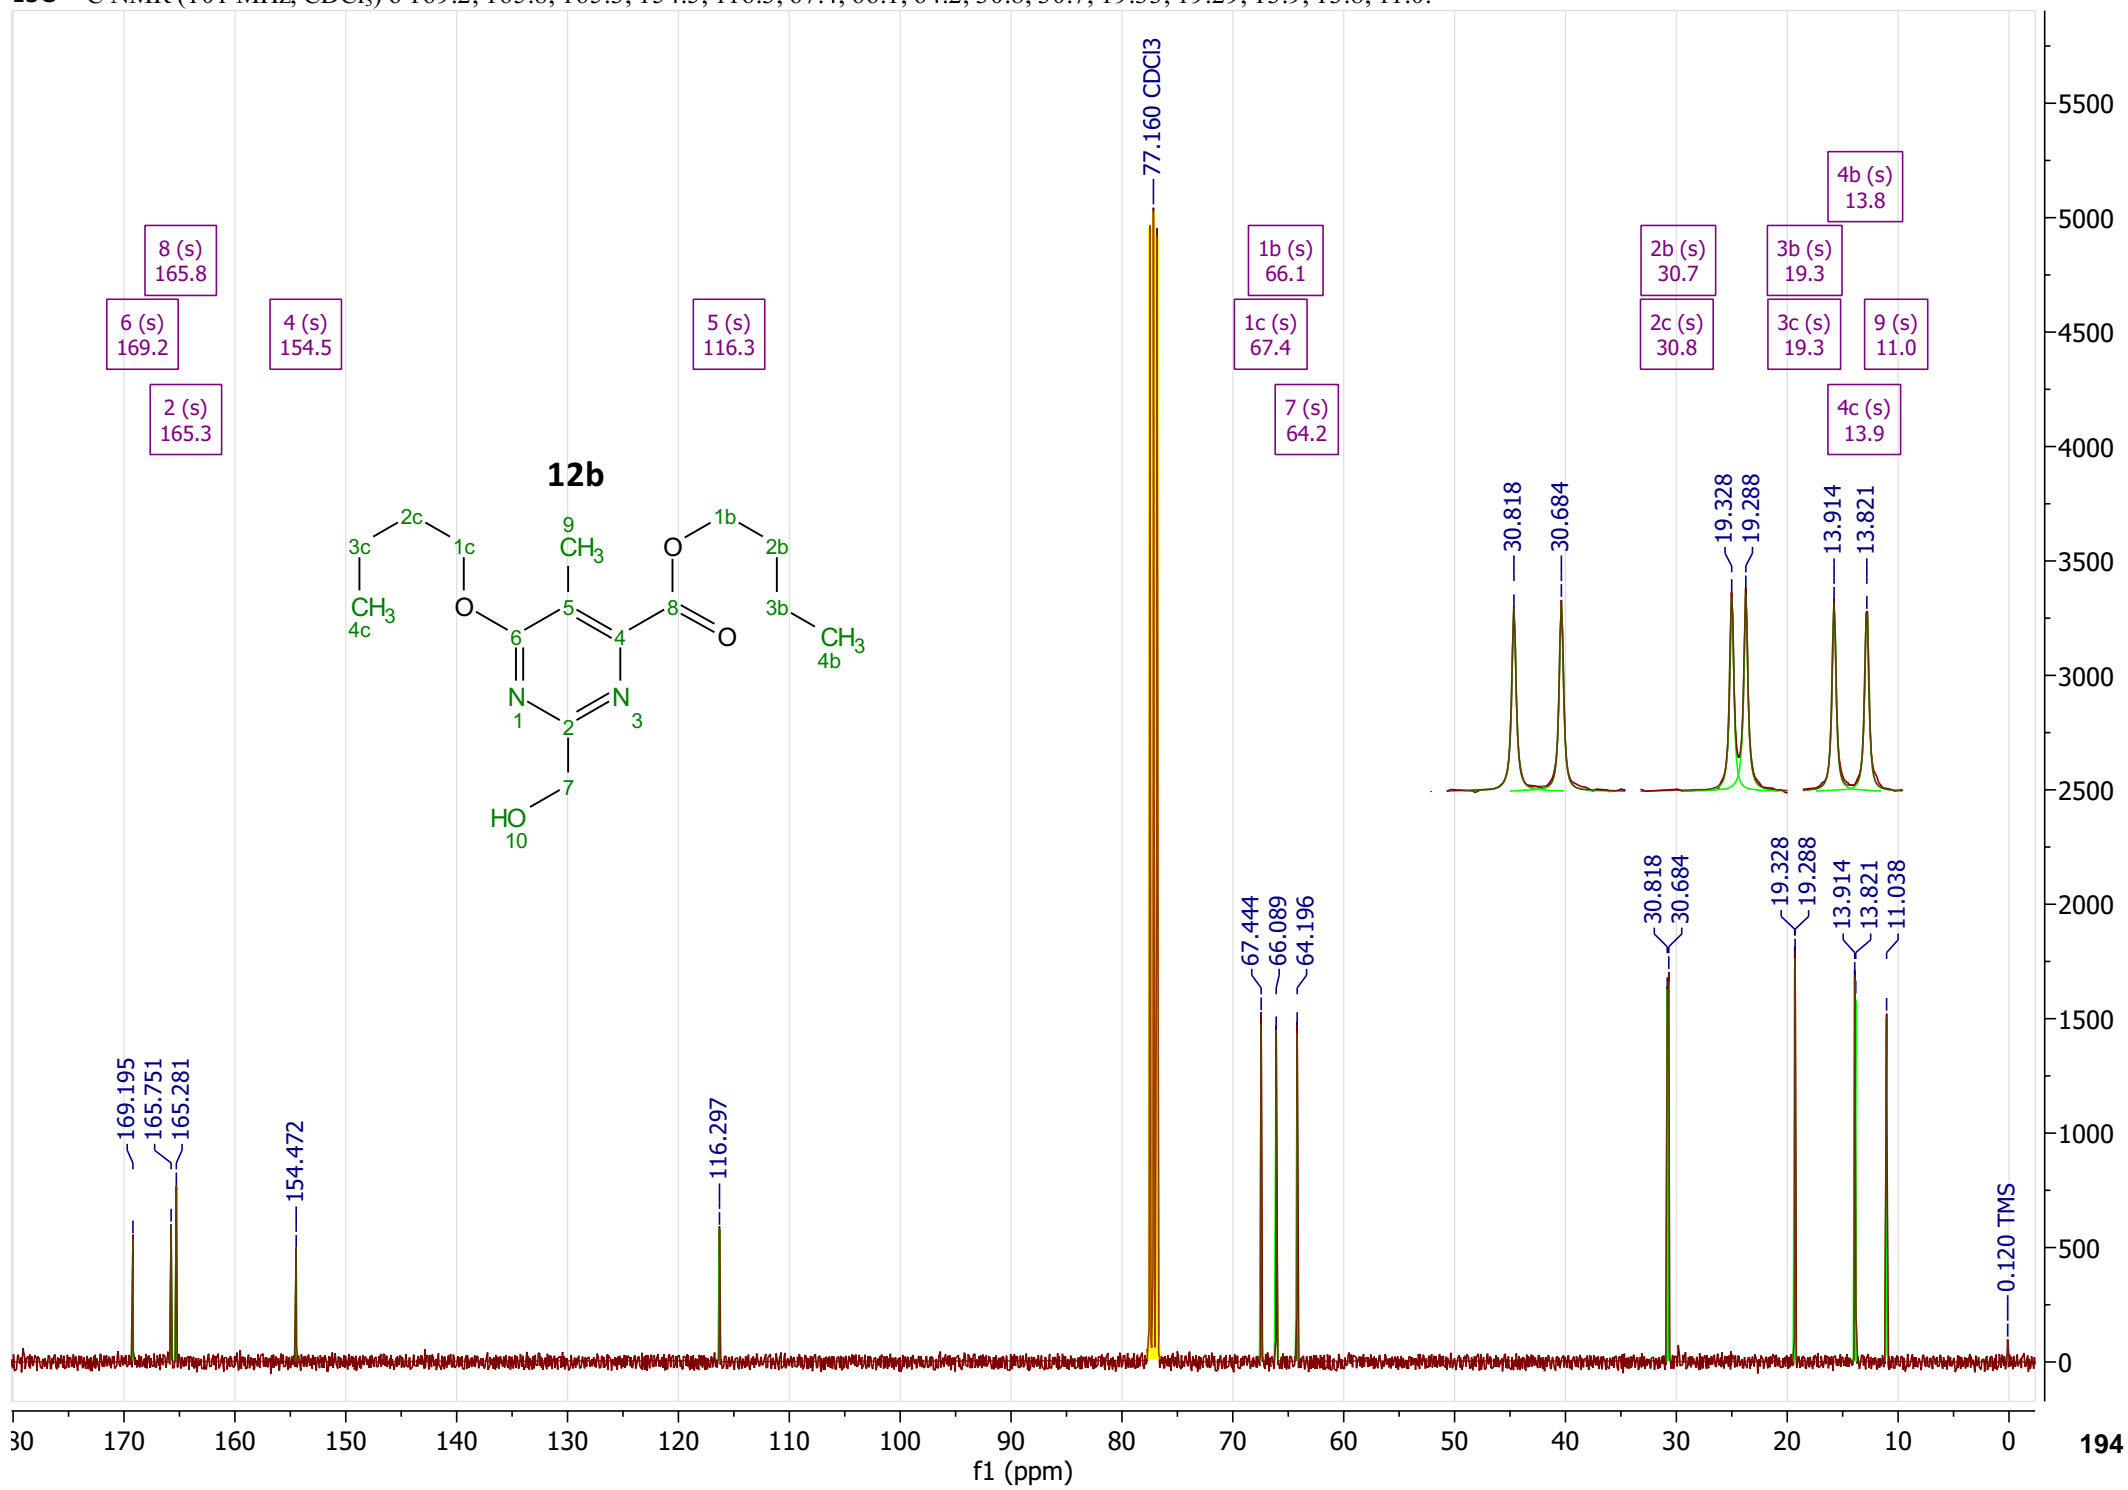

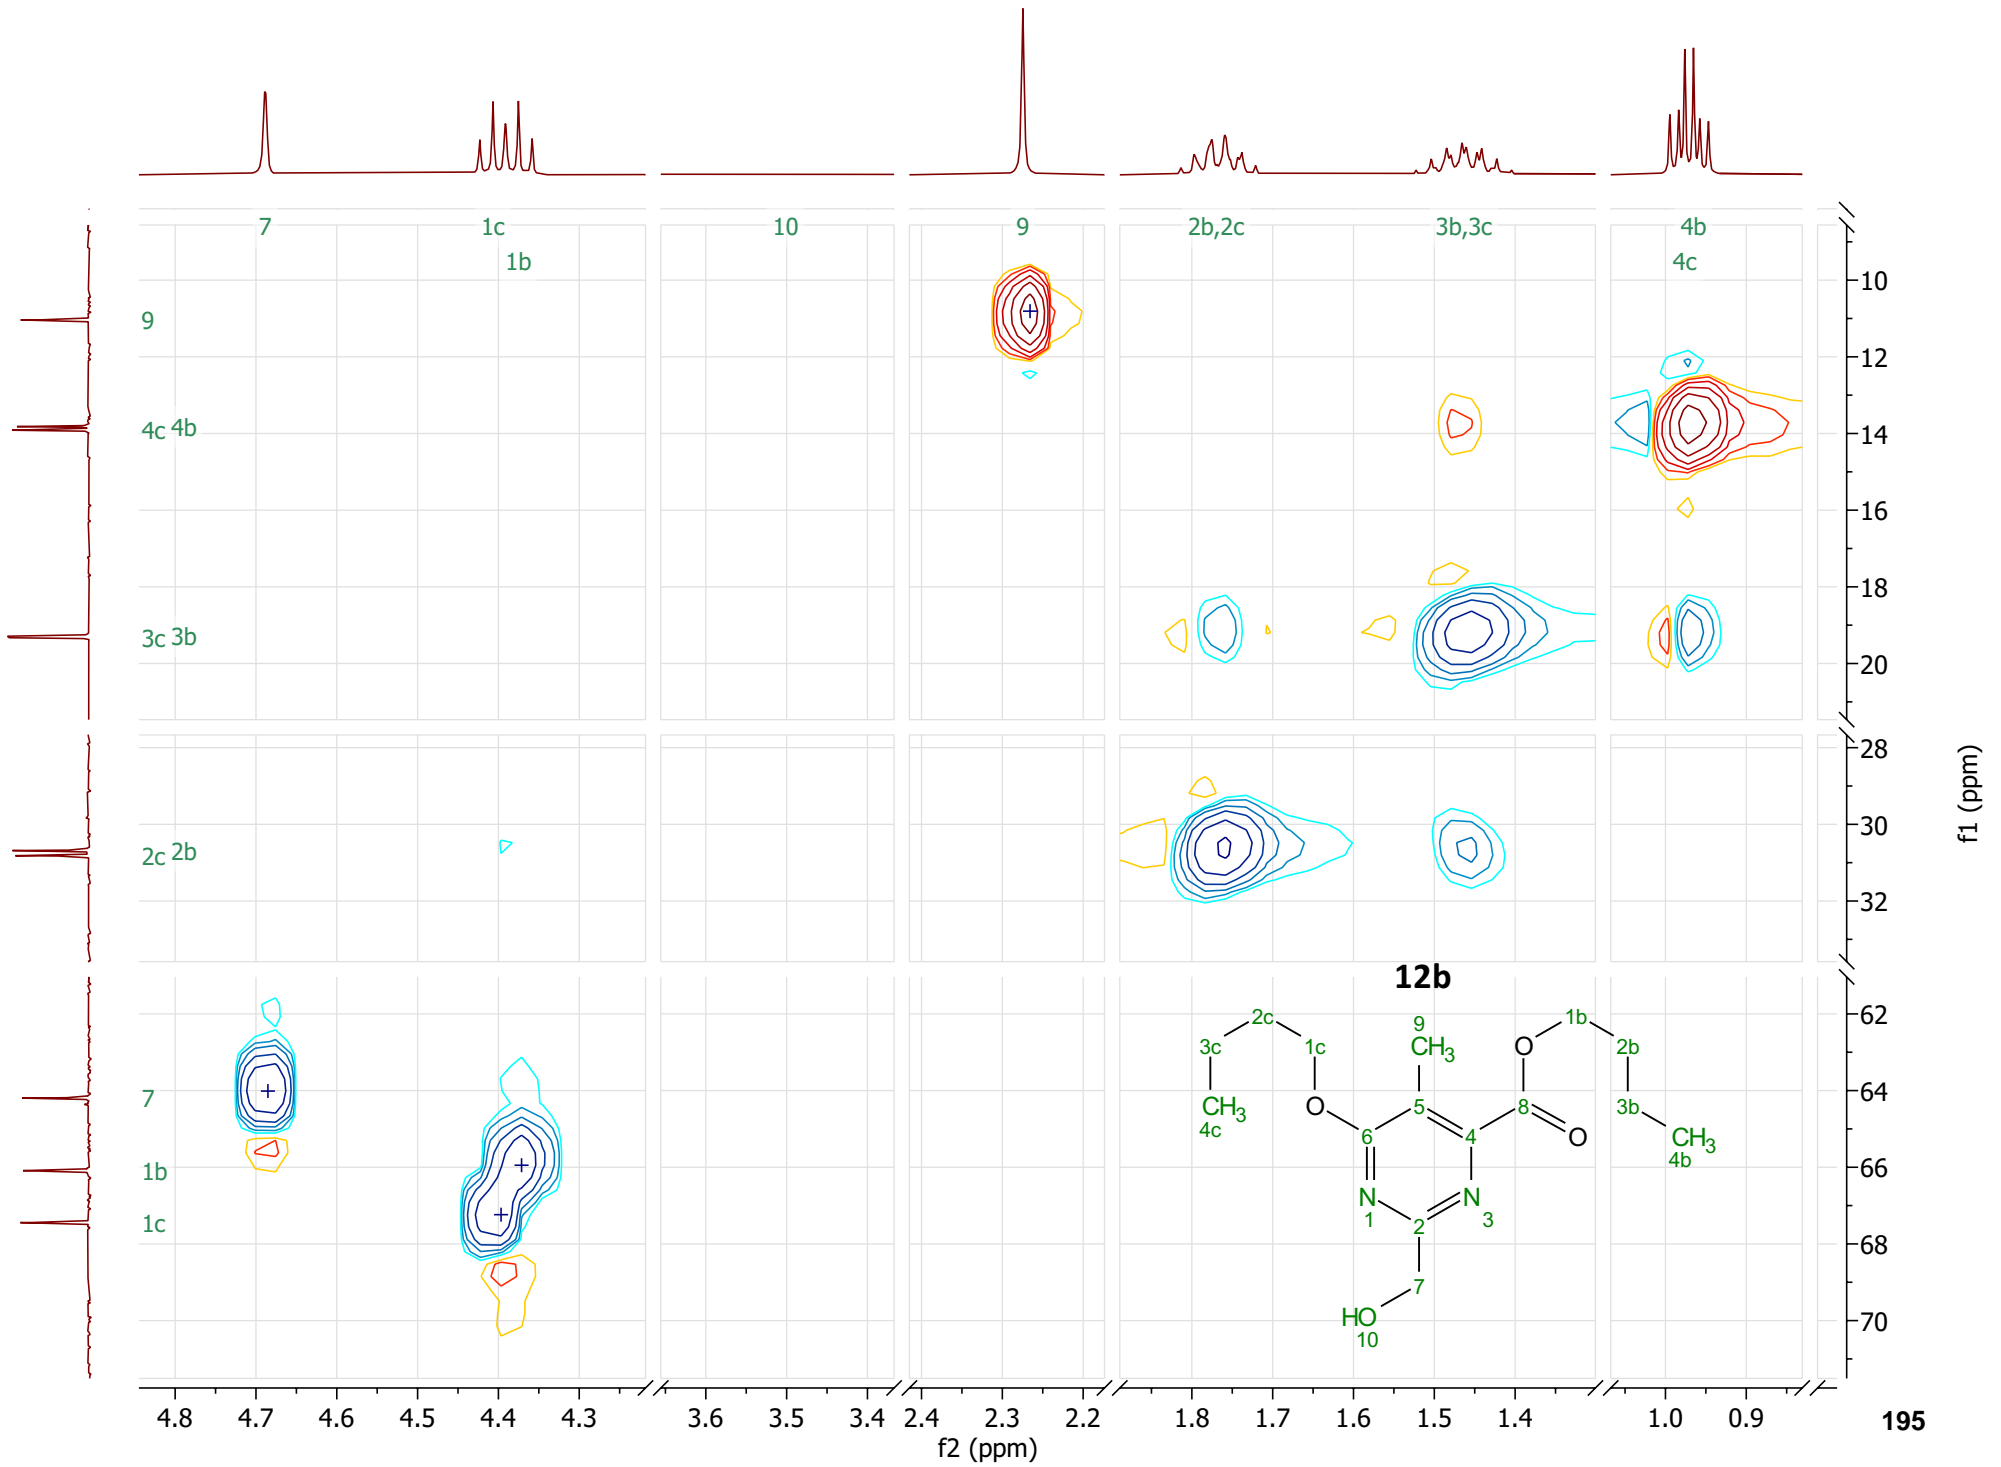

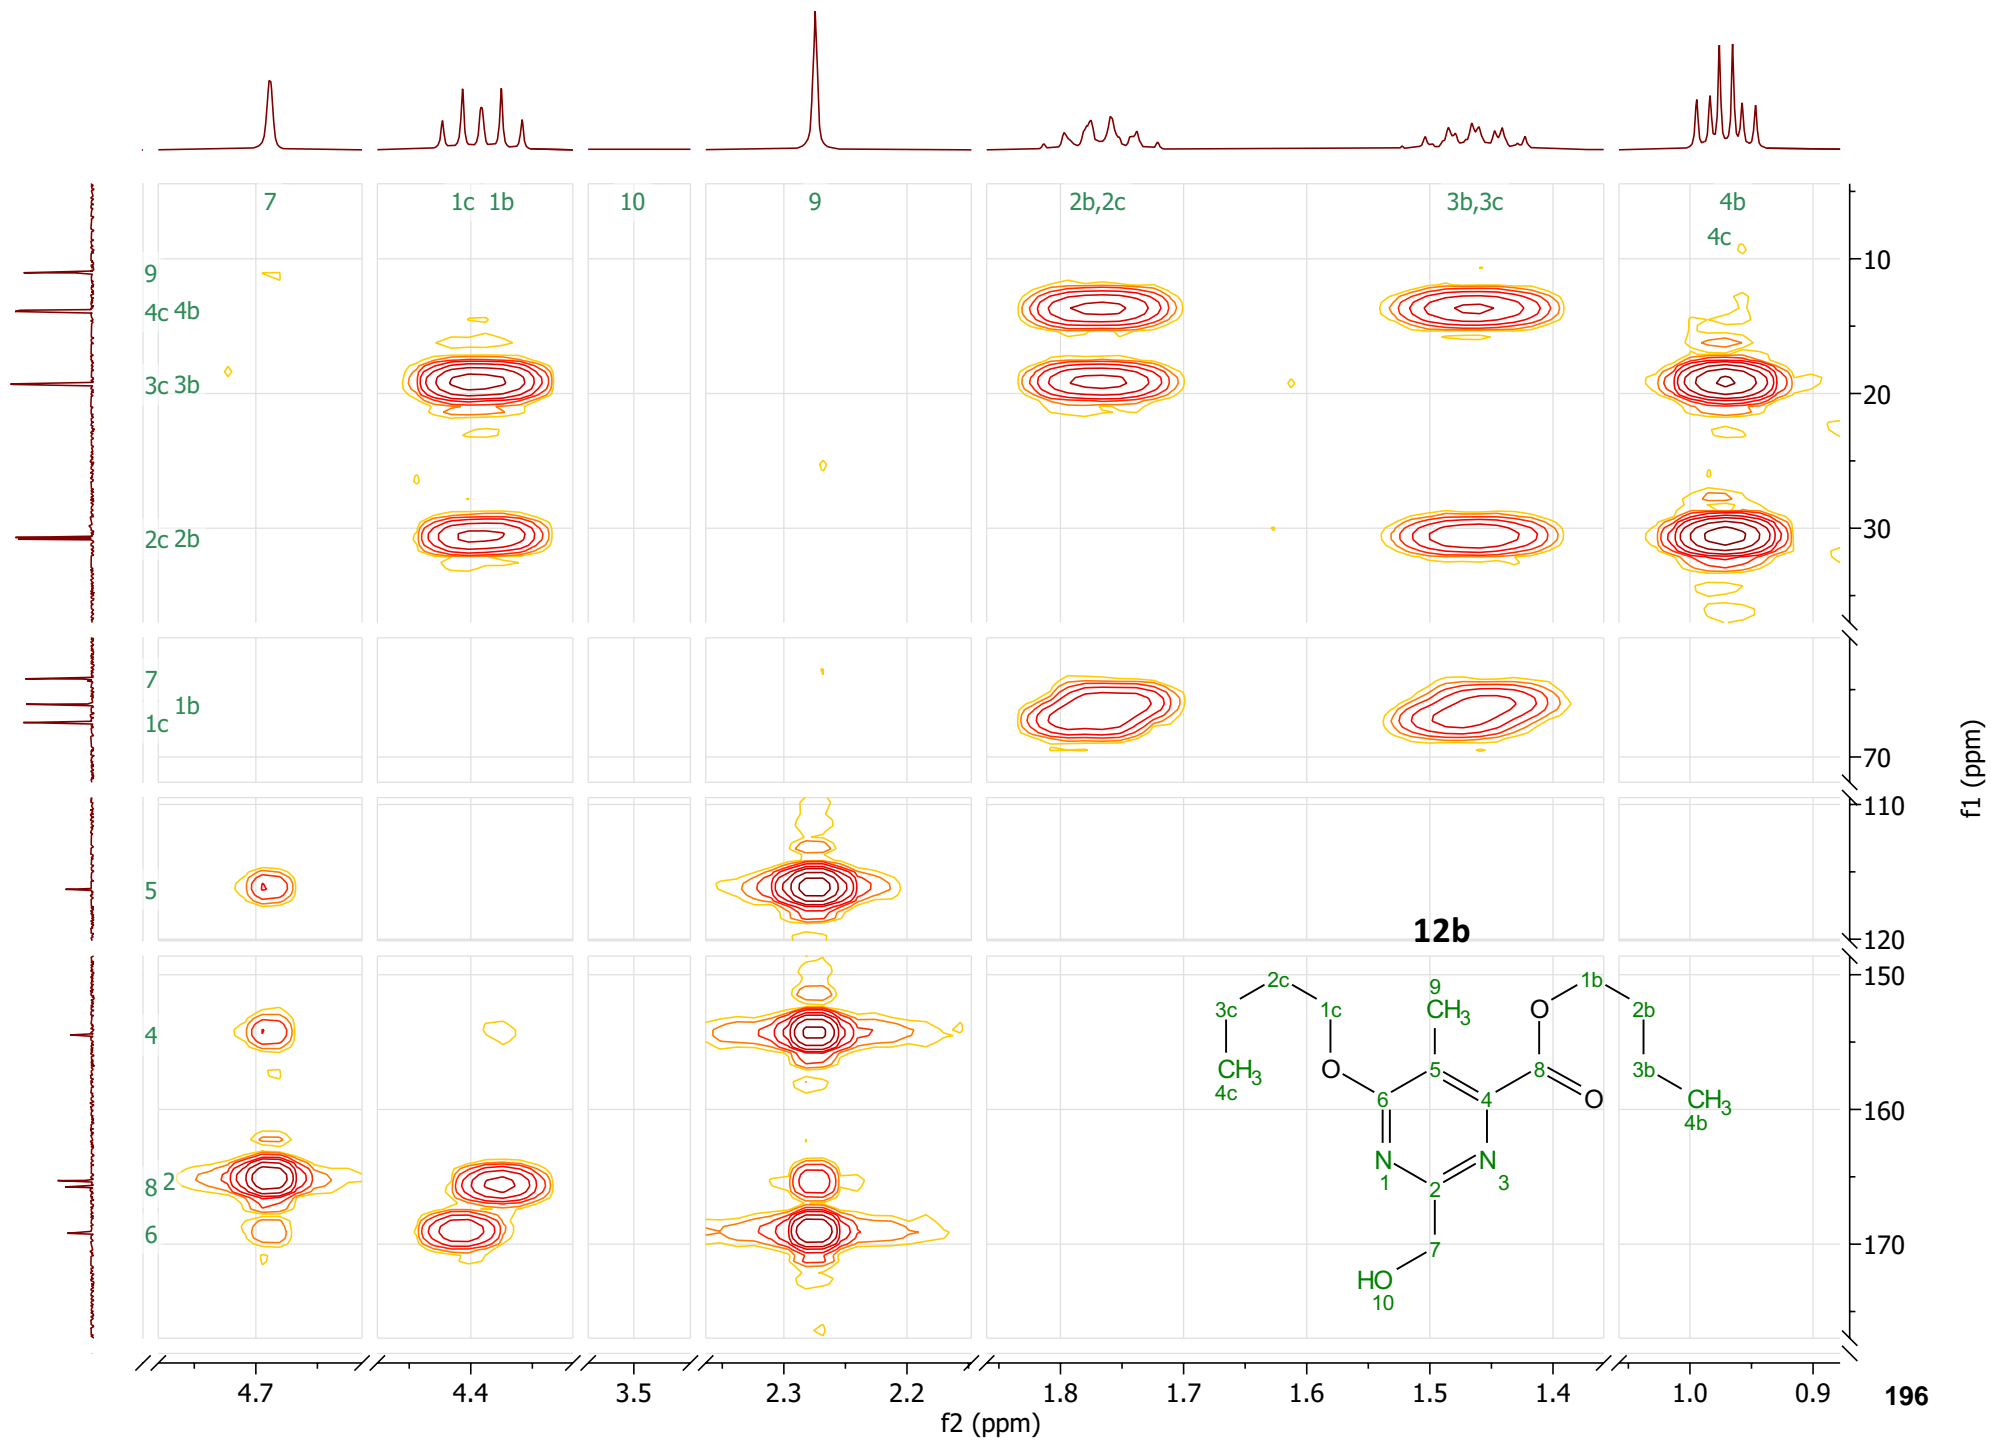

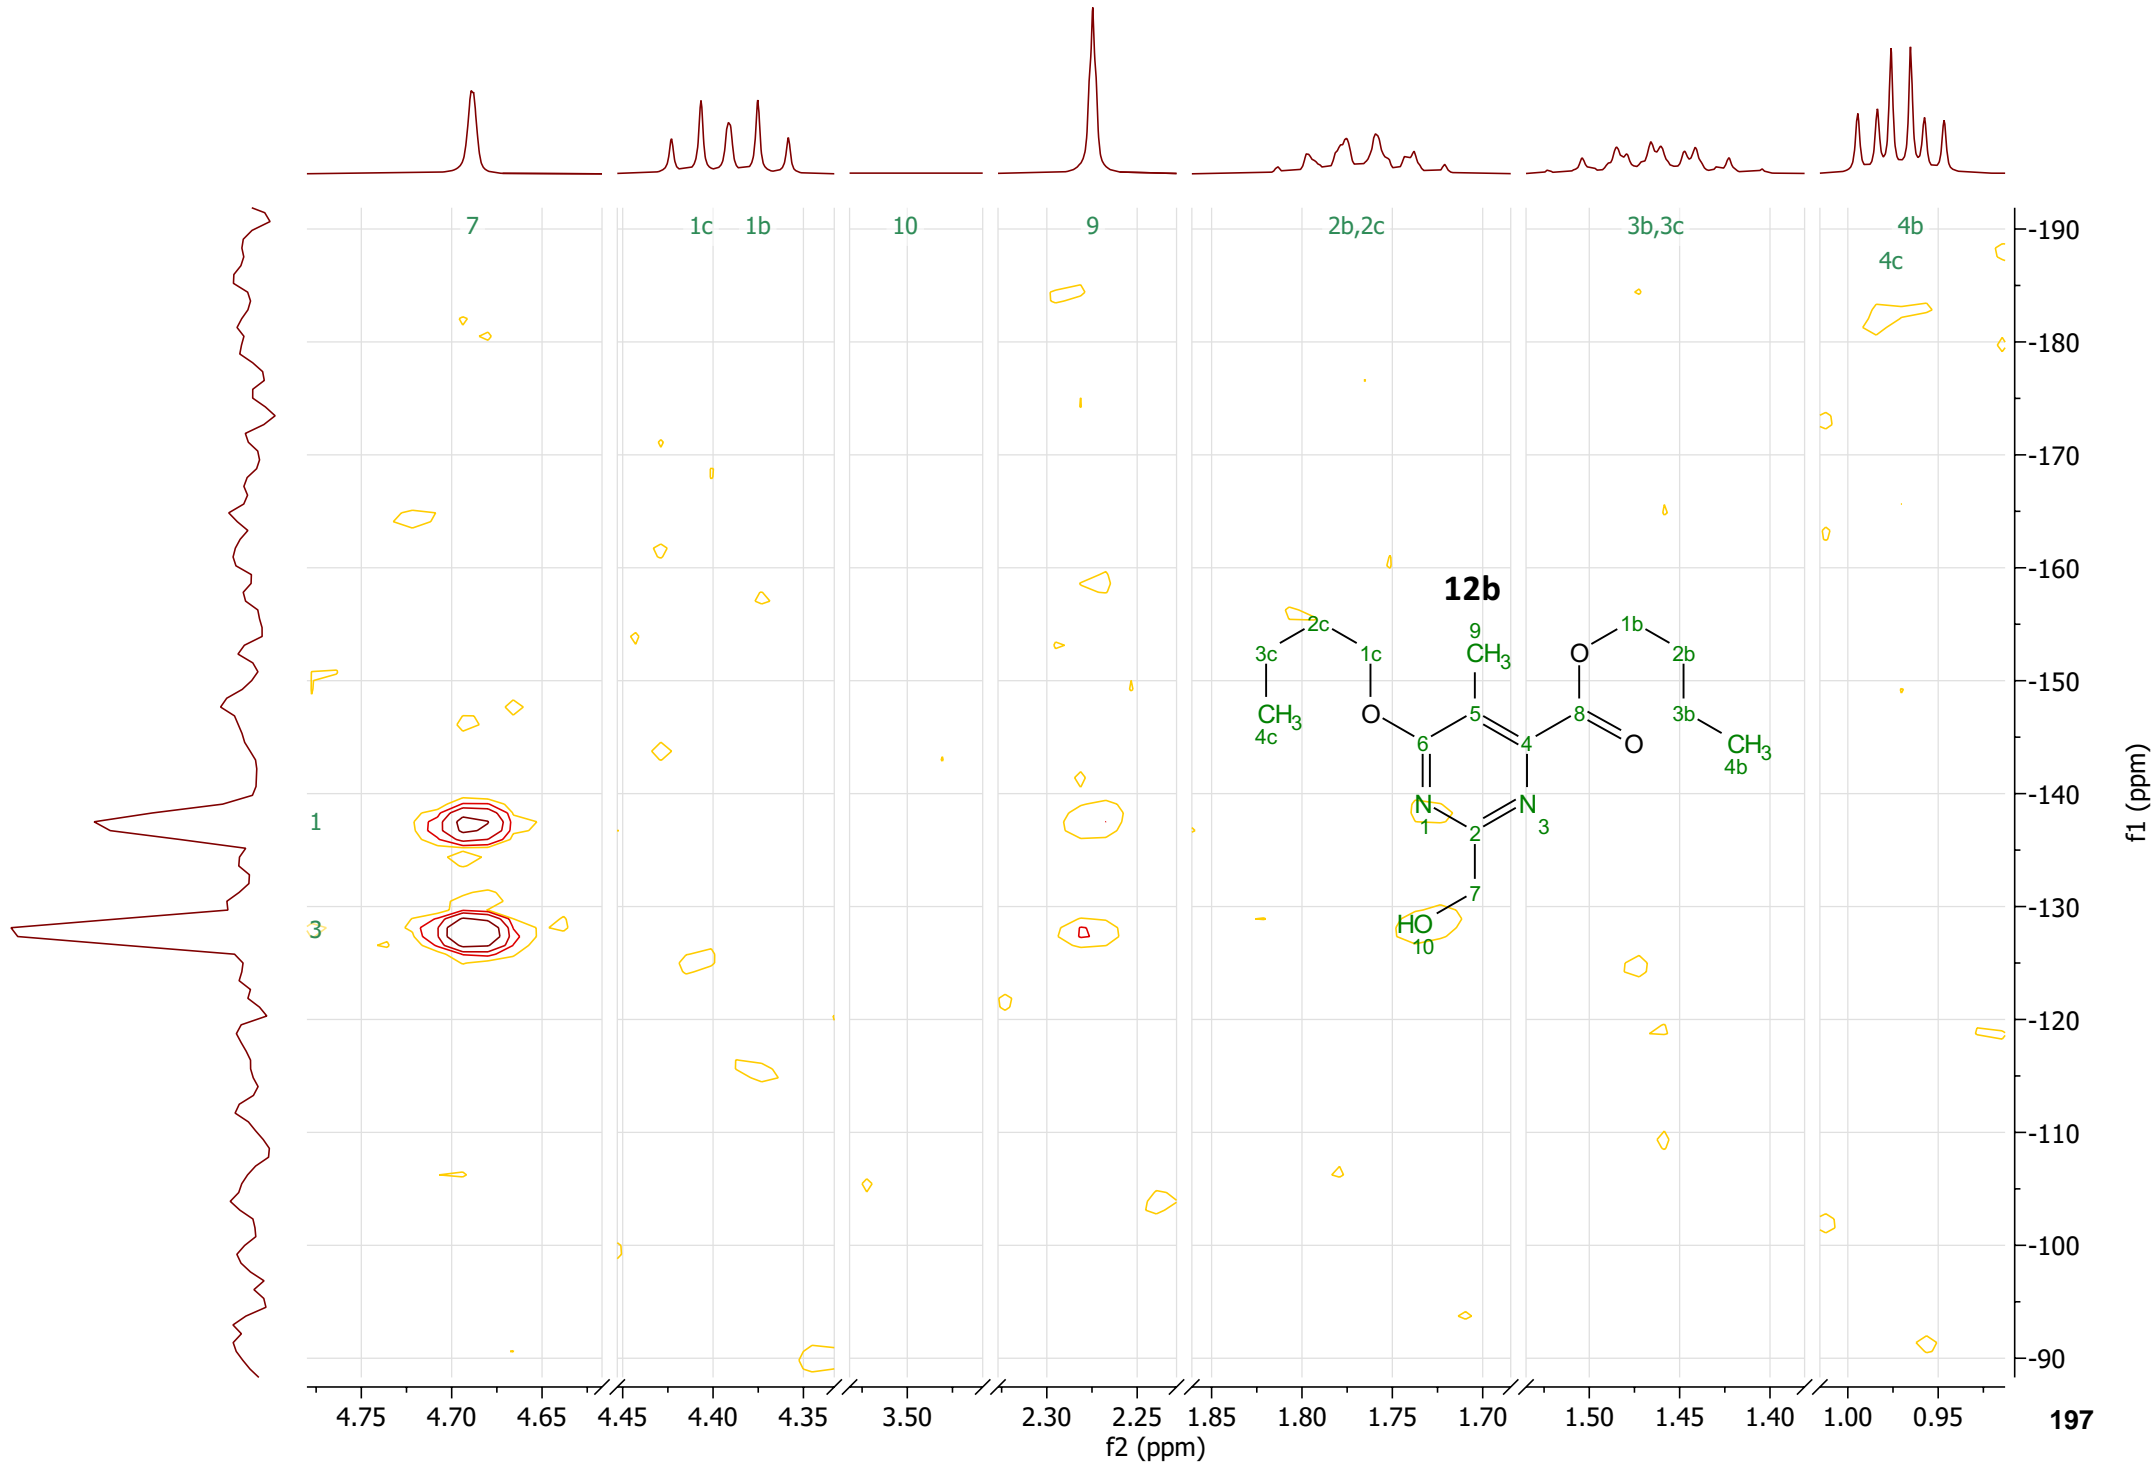

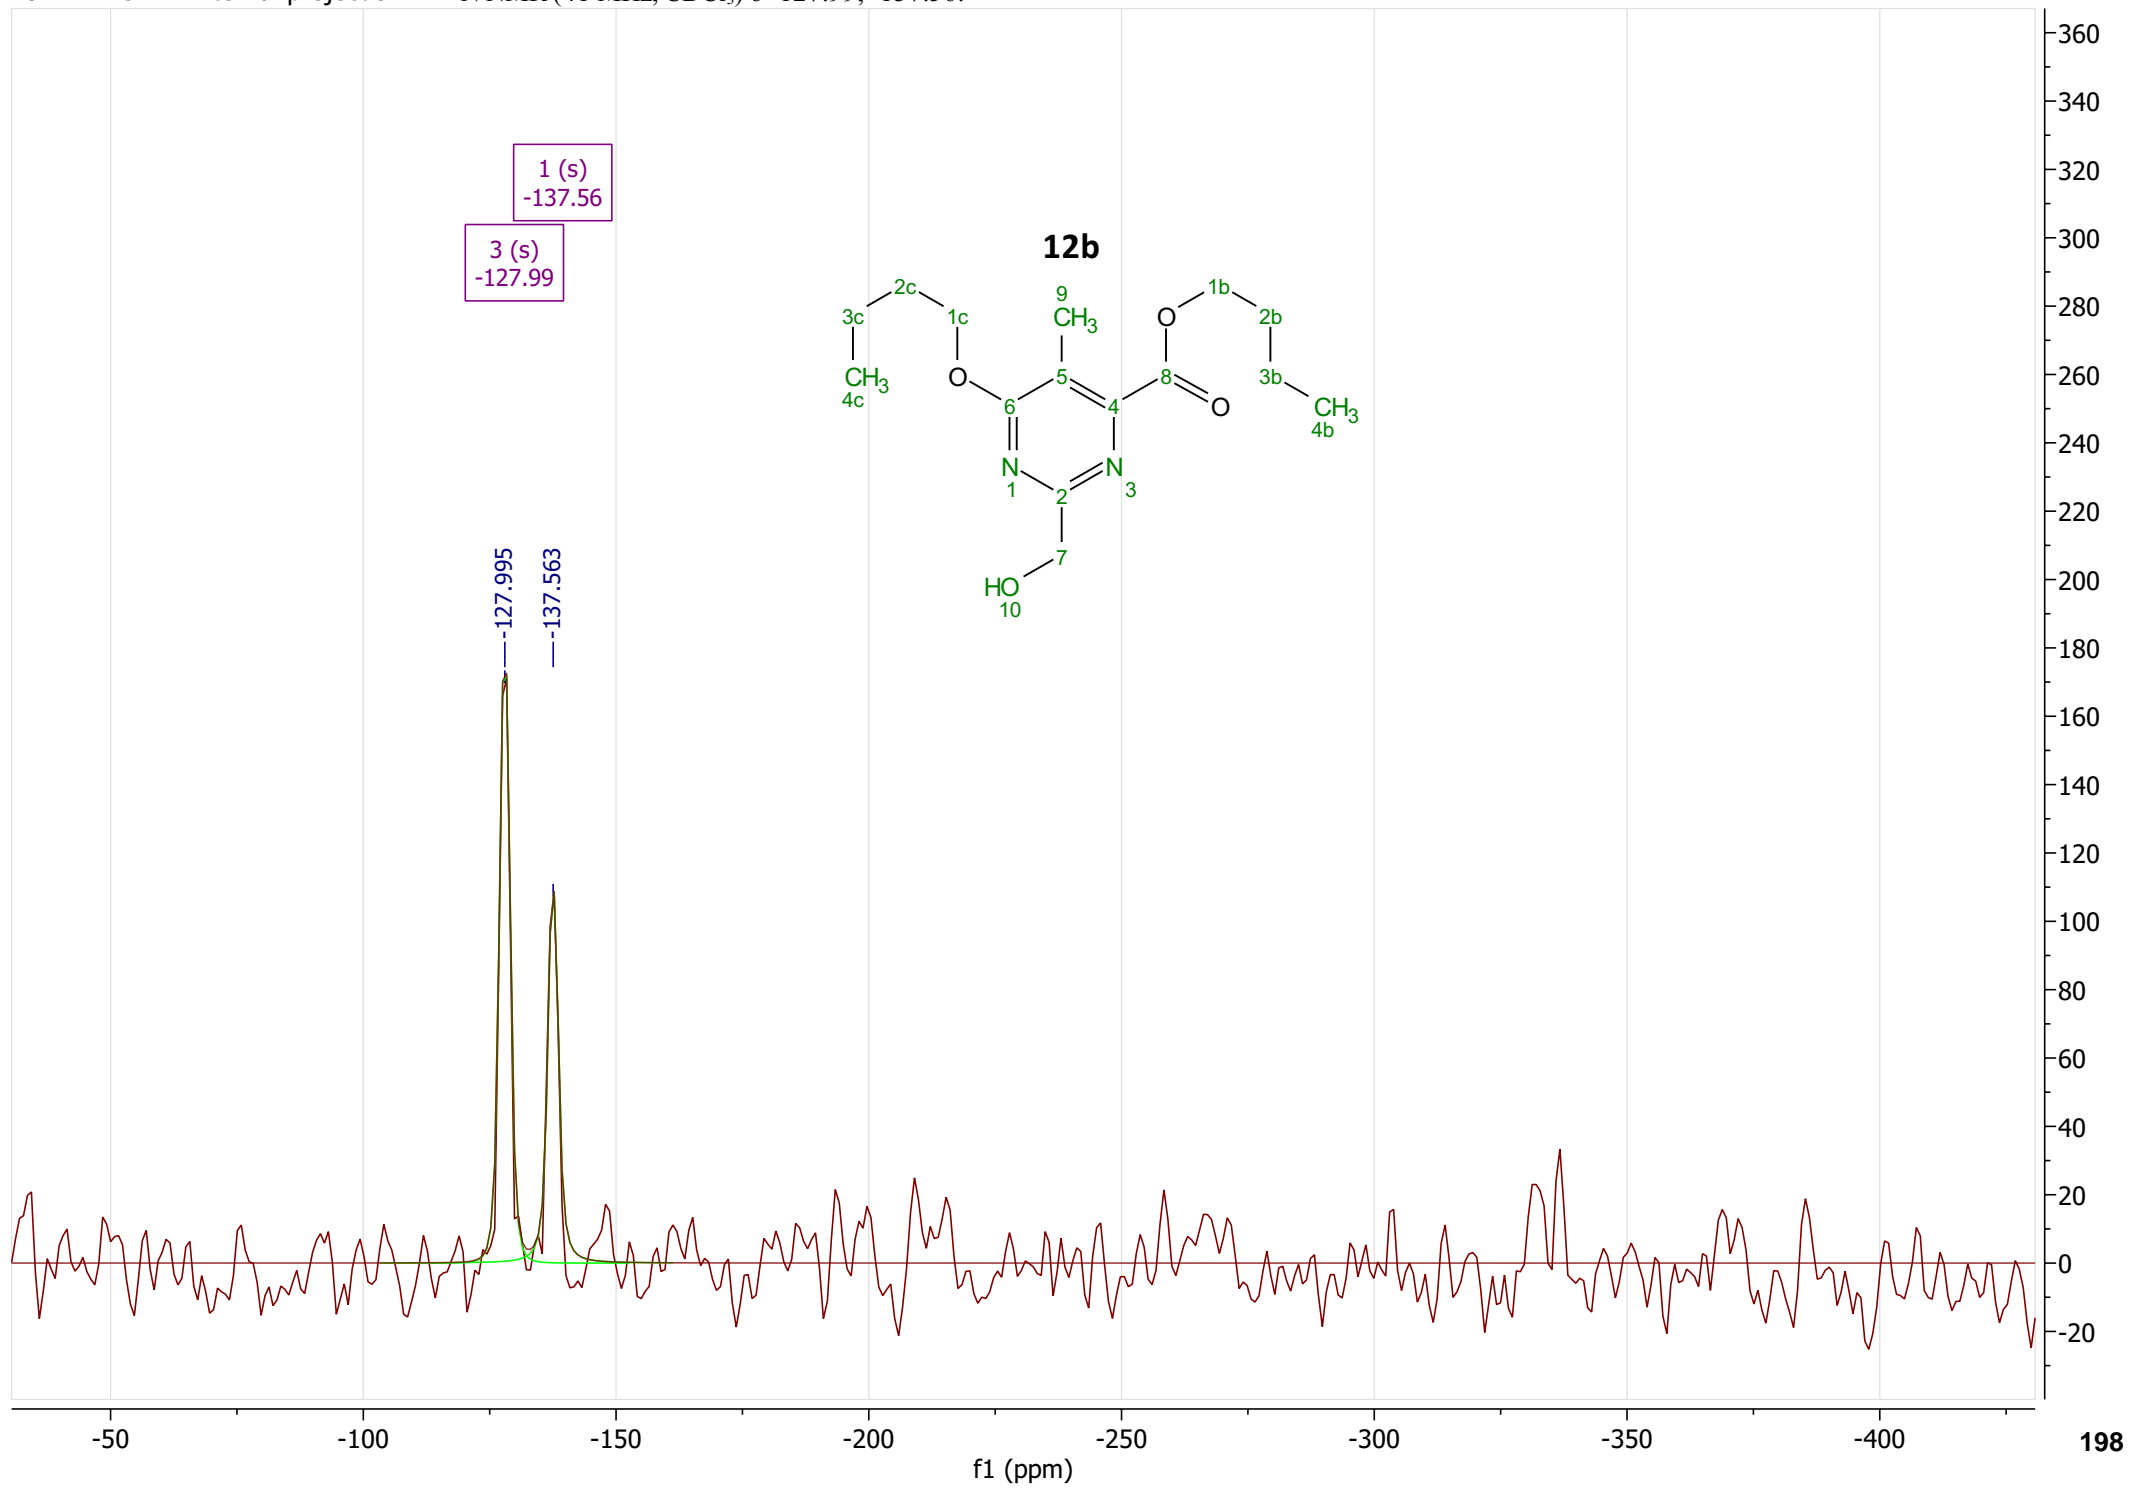

<sup>1</sup>H NMR (400 MHz, CDCl<sub>3</sub>) δ 4.69 (s, 2H), 4.40 (t, *J* = 6.6 Hz, 2H), 4.37 (t, *J* = 6.8 Hz, 2H), 3.49 (br s, 1H), 2.28 (s, 3H), 1.85 – 1.71 (m, 4H), 1.50 – 1.38 (m, 4H), 1.37 – 1.22 (m, 16H), 0.885 (app t, *J* = 6.8 Hz, 3H), 0.877 (app t, *J* = 6.8 Hz, 3H).

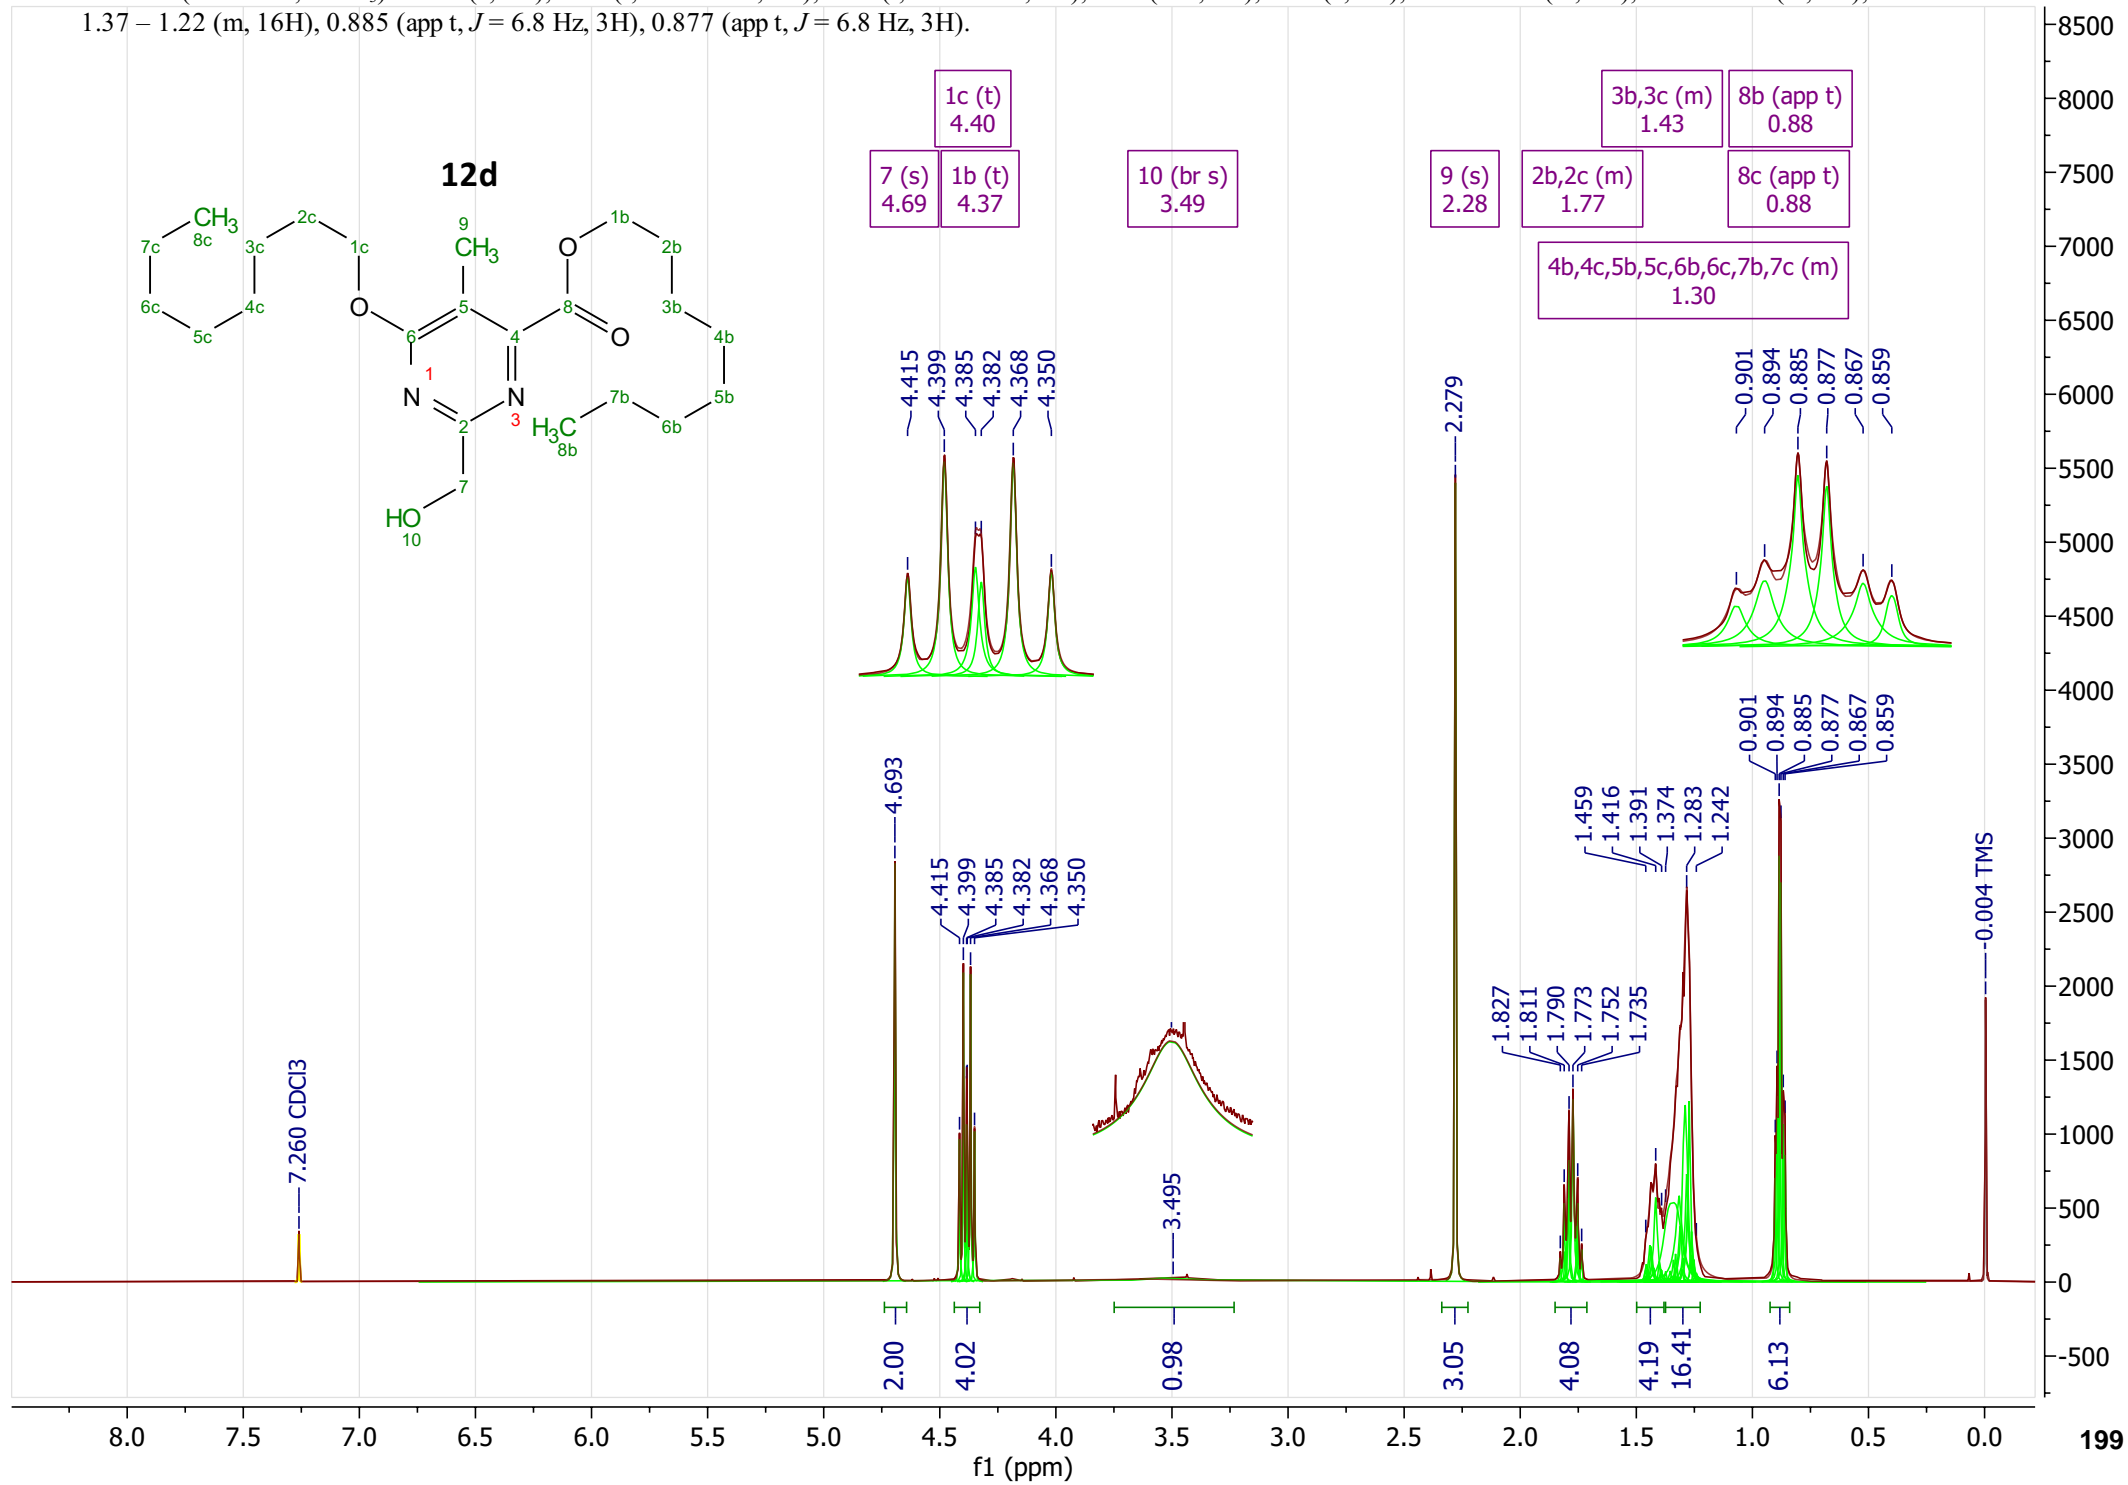

$^{13}\text{C}$  NMR (101 MHz,  $\text{CDCl}_3$ )  $\delta$  169.2, 165.7, 165.3, 154.5, 116.3, 67.8, 66.4, 64.2, 31.92, 31.89, 29.4, 29.34, 29.31, 29.29, 28.8, 28.7, 26.1, 26.0, 22.75, 22.67, 14.23, 14.22, 11.1.

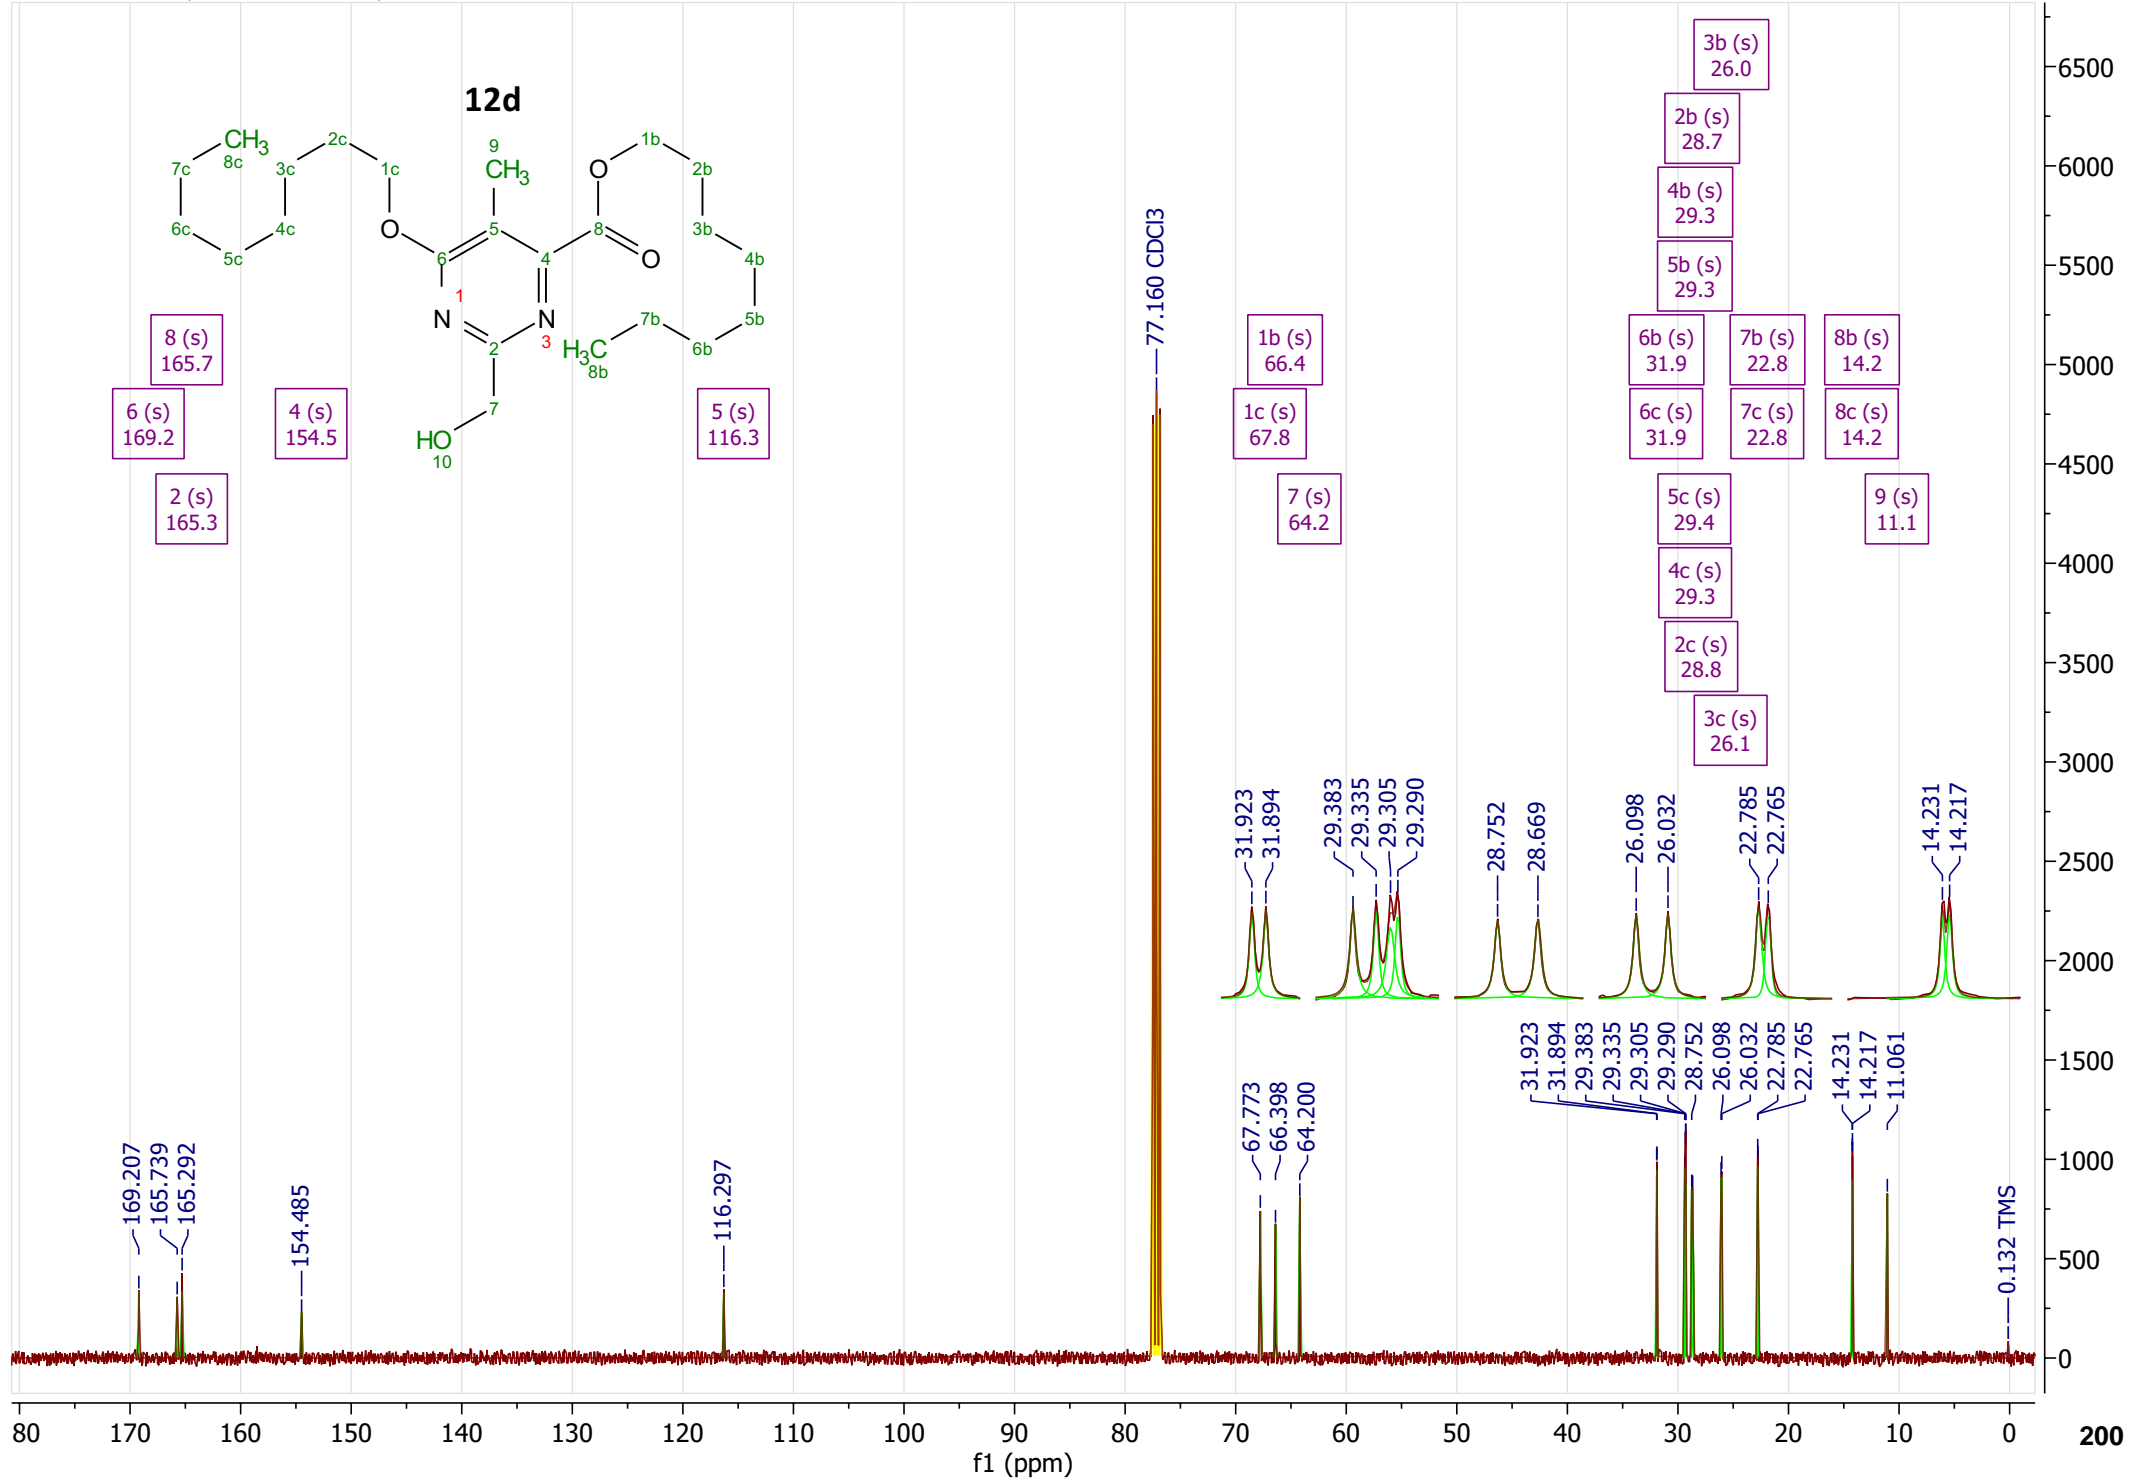



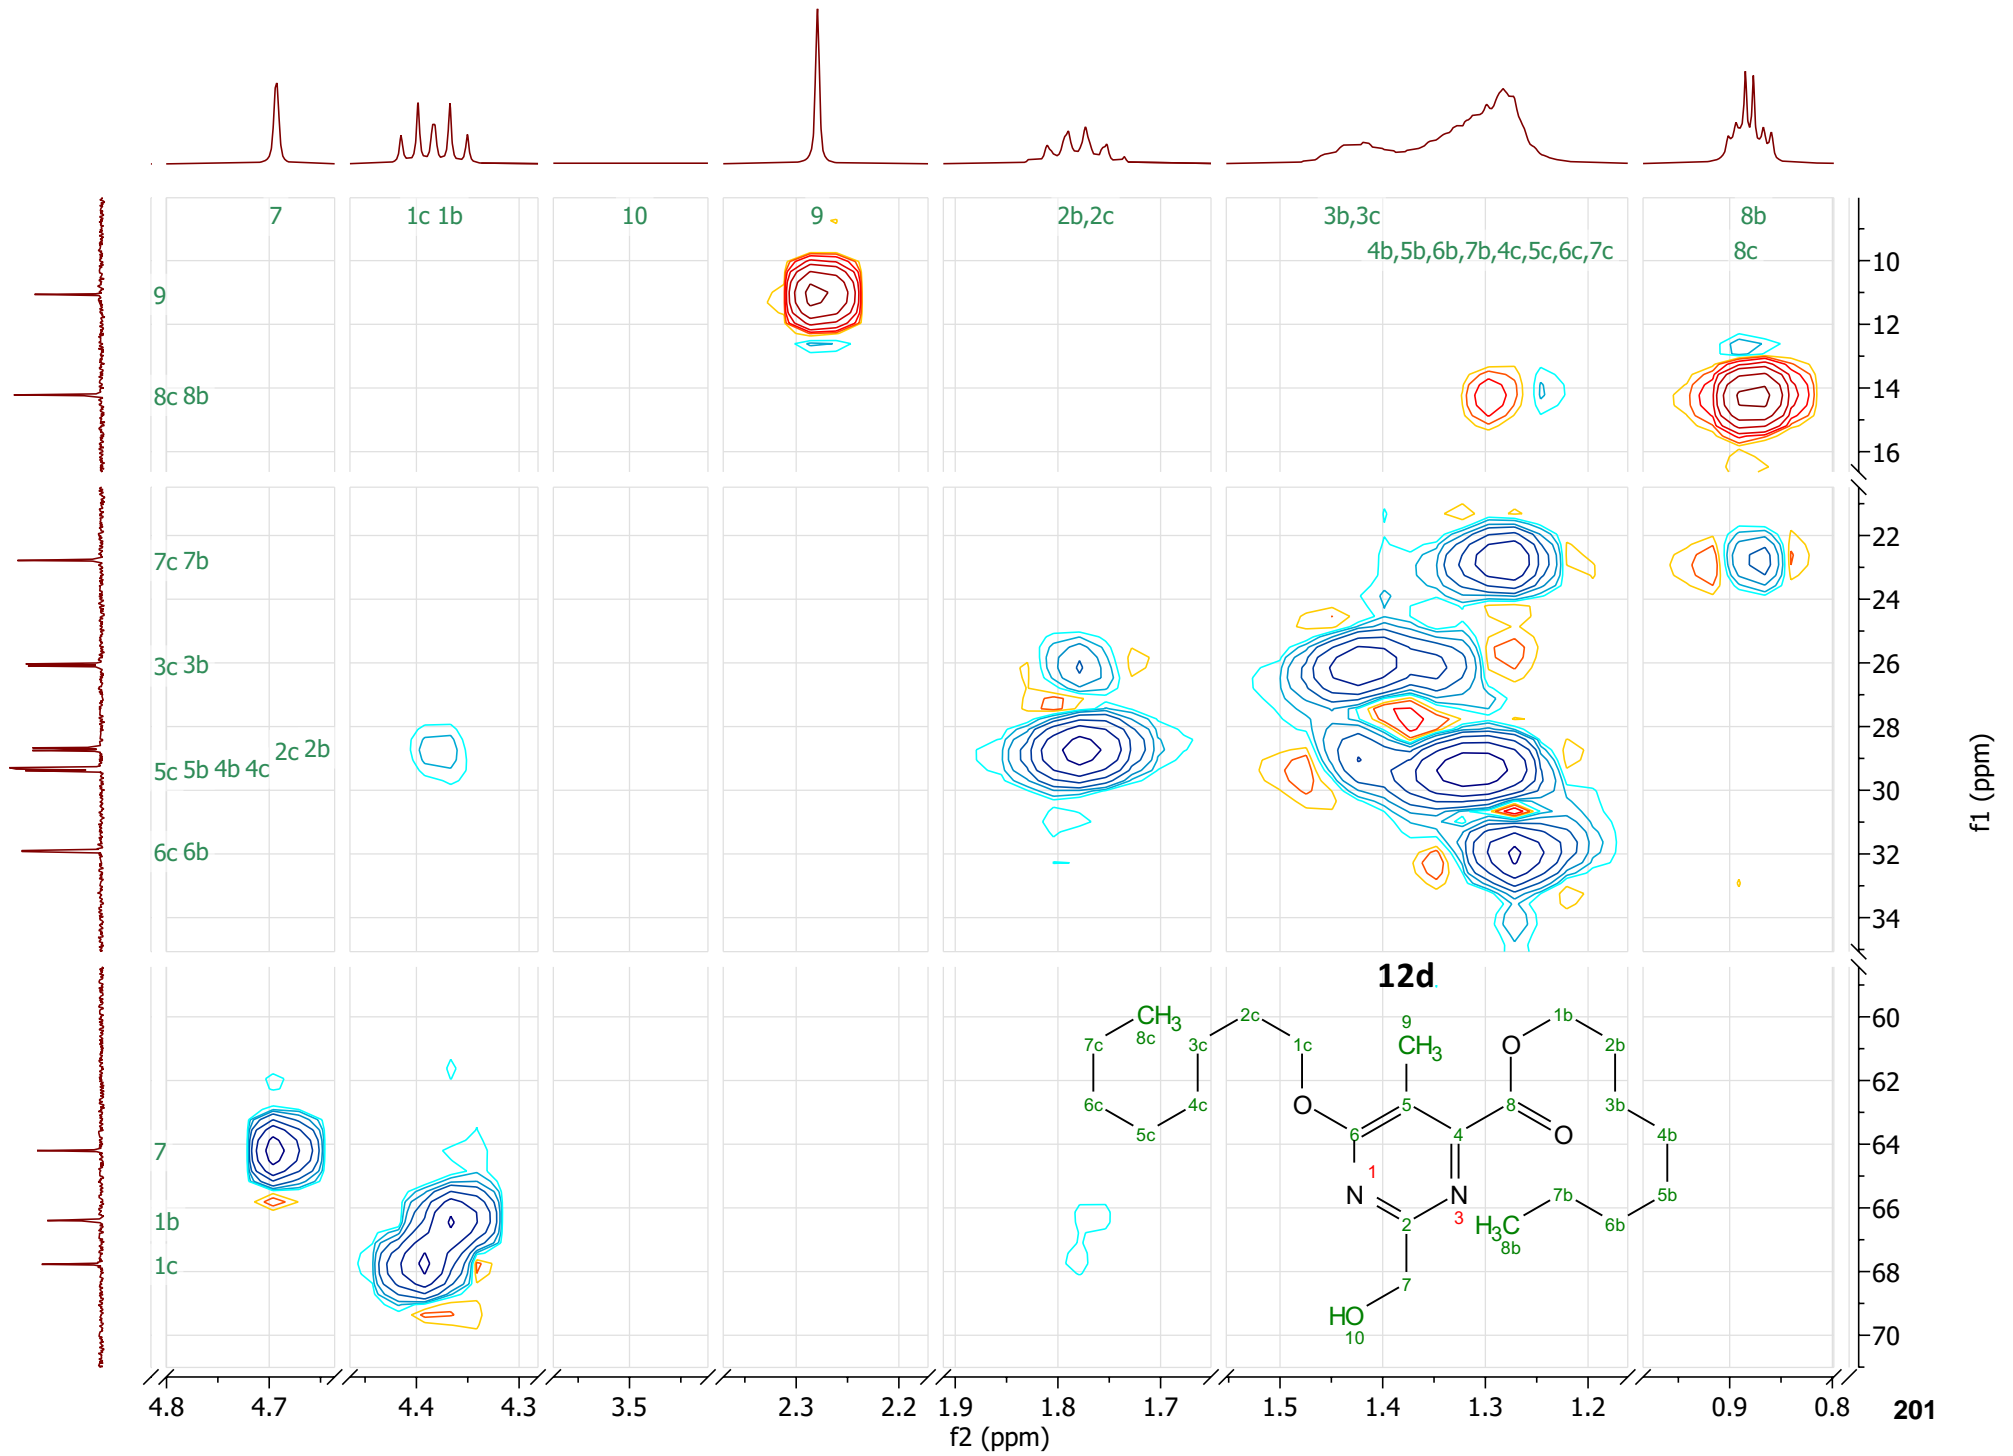

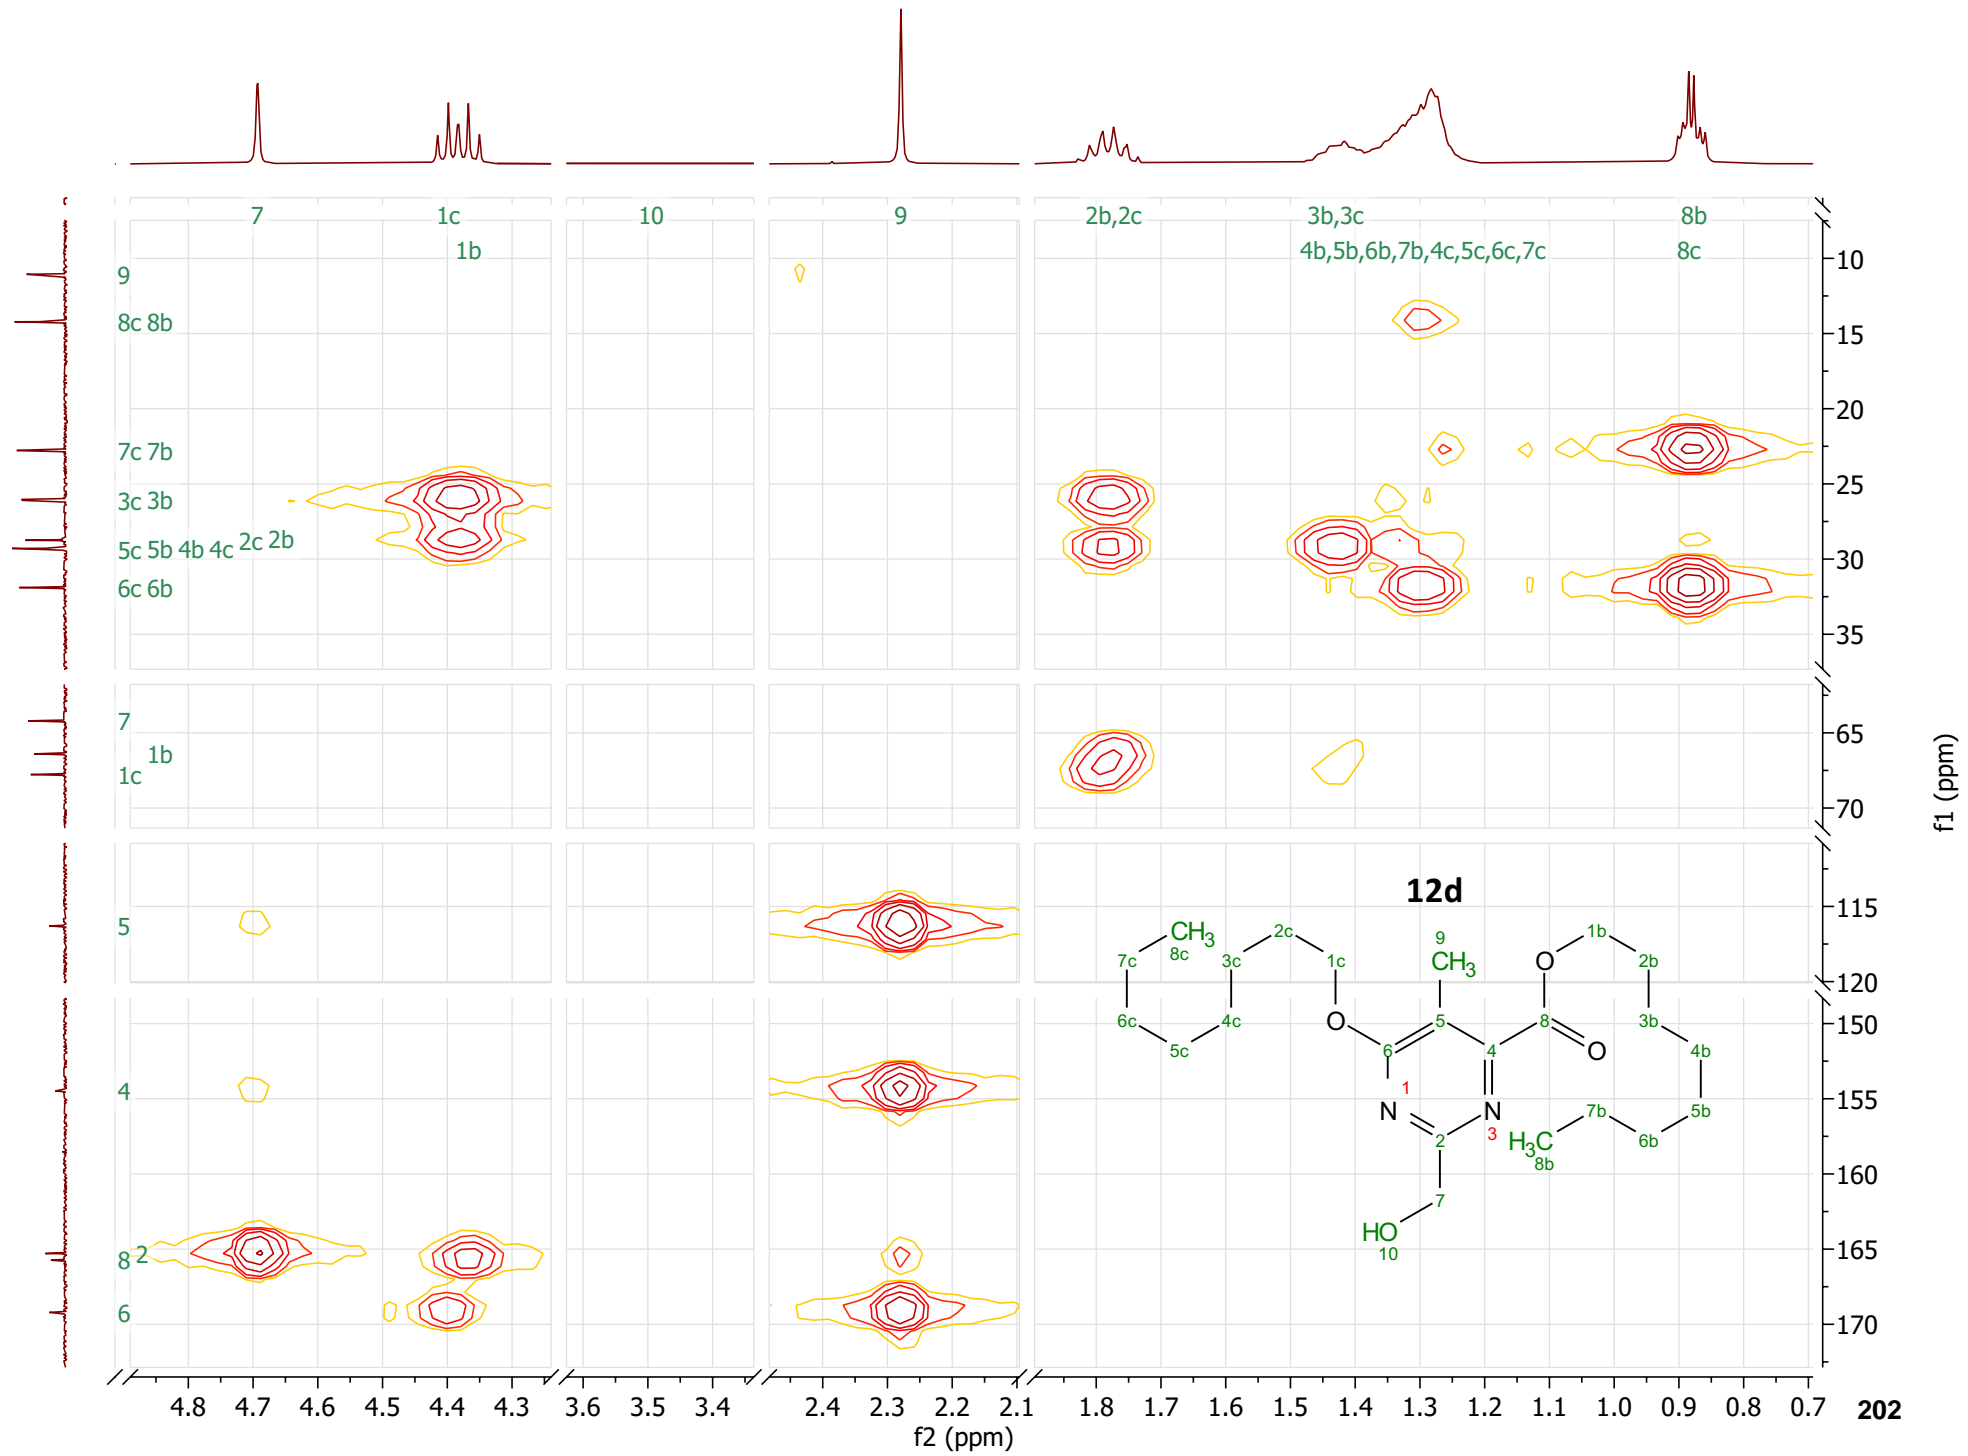

Supplement: 41598_2021_86852_MOESM2_ESM.pdf [file 41598_2021_86852_MOESM2_ESM.pdf]
